# Supplementary material for: Molecular dynamics of the matrisome across sea anemone life history
Source: eLife. 2025 Oct 23;14:RP105319. doi: 10.7554/eLife.105319 (PMC12549020; doi:10.7554/eLife.105319)
Supplement: Supplementary file 1. — Related to Figures 1 and 4. [file elife-105319-supp1.xlsx]

## Sheet: Sheet1
Supplementary File 1. In silico matrisome prediction of the Nematostella mesoglea including results of differential abundance analysis using moderated t-test (limma) for each developmental comparison (Adult - Larvae, Larvae - Primary Polyp, Adult - Primary Polyp). Related to Figs. 1 and 4.														Adult-Larvae comparison				Larvae – Primary Polyp				Primary Polyp – Adult
														fdr	hit_annotation	logFC	pvalue	fdr	hit_annotation	logFC	pvalue	fdr	hit_annotation	logFC	pvalue
transcript_id	StowersTranscriptSeqLink	gene_id	Stowers Description	new_manual_annotation	short_Name	Division manual	Category manual	Orthofinder_hirarchical_orthogroup	orthofinder_orthogroup	specificity	OG_specificity	closest_Swissprot_hit	closest_Swissprot_description
NV2t023164001.1	https://simrbase.stowers.org/feature/Nematostella/vectensis/mRNA/NV2t023164001.1	NV2.23164	Collagen alpha-4(VI) chain	Collagen 6-like-1	NvCol6-like-1	Core matrisome	Collagens	N0.HOG0000300	OG0000004	Cnidaria specific	Cnidaria specific	P15989.2	Collagen alpha-3(VI) chain	0.0345531	hit	-1.28576	0.0179943	0.154476	candidate	-0.890302	0.0739685	0.461924	no hit	-0.395463	0.387831
NV2t023710001.1	https://simrbase.stowers.org/feature/Nematostella/vectensis/mRNA/NV2t023710001.1	NV2.23710	Collagen	Collagen 6-like-2	NvCol6-like-2	Core matrisome	Collagens	N0.HOG0000300	OG0000004	Cnidaria specific	Cnidaria specific	O42401.1	Matrilin-3	0.0219898	hit	-1.45505	0.0103216	0.532154	no hit	-0.393044	0.393431	0.068204	candidate	-1.06201	0.0408808
NV2t024229003.1	https://simrbase.stowers.org/feature/Nematostella/vectensis/mRNA/NV2t024229003.1	NV2.24229	Collagen alpha-4(VI) chain	Collagen 6-like-3	NvCol6-like-3	Core matrisome	Collagens	N0.HOG0000300	OG0000004	Cnidaria specific	Cnidaria specific	Q28833.2	von Willebrand factor
NV2t014089001.1	https://simrbase.stowers.org/feature/Nematostella/vectensis/mRNA/NV2t014089001.1	NV2.14089	Collagen type VI alpha	Collagen 6-like-4, partial	NvCol6-like-4	Core matrisome	Collagens	N0.HOG0001235	OG0000188			B3EWZ3.1	No description found	0.001283	hit	-1.71657	0.000204107	0.170922	no hit	-0.523779	0.0848719	0.00579427	hit	-1.19279	0.00208575
NV2t021411001.1	https://simrbase.stowers.org/feature/Nematostella/vectensis/mRNA/NV2t021411001.1	NV2.21411	Collagen type IV alpha 1	Collagen type IVa	NvCol4a	Core matrisome	Collagens	N0.HOG0000813	OG0000028			P27393.1	Collagen alpha-2(IV) chain	0.00125496	hit	-1.27206	0.000197975	0.013272	candidate	-0.865105	0.00230551	0.110247	no hit	-0.406954	0.0721887
NV2t021409001.1	https://simrbase.stowers.org/feature/Nematostella/vectensis/mRNA/NV2t021409001.1	NV2.21409	Collagen IV NC1 domain-containing protein	Collagen type IVb	NvCol4b	Core matrisome	Collagens	N0.HOG0000813	OG0000028			P27393.1	Collagen alpha-2(IV) chain	0.00296669	hit	-1.56323	0.00073773	0.00471573	hit	-1.67494	0.000472594	0.76102	no hit	0.111715	0.714439
NV2t011420001.1	https://simrbase.stowers.org/feature/Nematostella/vectensis/mRNA/NV2t011420001.1	NV2.11420	collagen alpha-1 XV chain	Collagen XVIII-like	NvCol18	Core matrisome	Collagens	N0.HOG0001052	OG0000084			P39059.2	Collagen alpha-1(XV) chain	0.00482778	hit	-1.04848	0.00144482	0.0116735	hit	-1.00158	0.00190307	0.867336	no hit	-0.0468975	0.836624
NV2t024535001.1	https://simrbase.stowers.org/feature/Nematostella/vectensis/mRNA/NV2t024535001.1	NV2.24535	Autotransporter	Collagen1a	NvCol1a	Core matrisome	Collagens	N0.HOG0000757	OG0000020	Cnidaria specific	Cnidaria specific	P02457.3	Collagen alpha-1(I) chain
NV2t011872001.1	https://simrbase.stowers.org/feature/Nematostella/vectensis/mRNA/NV2t011872001.1	NV2.11872	Cytochrome C family protein	Collagen1b	NvCol1b	Core matrisome	Collagens	N0.HOG0000755	OG0000020	Cnidaria specific	Cnidaria specific	P13941.3	Collagen alpha-1(III) chain	0.112678	candidate	-1.33298	0.074409	0.494828	no hit	-0.636594	0.355801	0.388095	no hit	-0.696387	0.314998
NV2t012027001.1	https://simrbase.stowers.org/feature/Nematostella/vectensis/mRNA/NV2t012027001.1	NV2.12027	collagen alpha-1 I chain-like	Collagen1c	NvCol1c	Core matrisome	Collagens	N0.HOG0000754	OG0000020	Cnidaria specific	Cnidaria specific	P02454.5	Collagen alpha-1(I) chain	0.283211	no hit	-0.886567	0.219364	0.379749	no hit	-0.824874	0.250134	0.941529	no hit	-0.0616933	0.928372
NV2t012159001.1	https://simrbase.stowers.org/feature/Nematostella/vectensis/mRNA/NV2t012159001.1	NV2.12159	collagen type V alpha 2	Collagen2a	NvCol2a	Core matrisome	Collagens	N0.HOG0000755	OG0000020	Cnidaria specific	Cnidaria specific	Q91717.2	Collagen alpha-1(II) chain	0.0884646	candidate	-1.36059	0.0558412	0.238808	no hit	-1.01642	0.133391	0.650865	no hit	-0.344165	0.587008
NV2t012104001.1	https://simrbase.stowers.org/feature/Nematostella/vectensis/mRNA/NV2t012104001.1	NV2.12104	collagen type I alpha 2	Collagen2b	NvCol2b	Core matrisome	Collagens	N0.HOG0000755	OG0000020	Cnidaria specific	Cnidaria specific	P11087.4	Collagen alpha-1(I) chain	0.0923814	candidate	-1.37534	0.0588047	0.185989	candidate	-1.183	0.0947706	0.805619	no hit	-0.192336	0.7658
NV2t010959005.1	https://simrbase.stowers.org/feature/Nematostella/vectensis/mRNA/NV2t010959005.1	NV2.10959	Collagen alpha chain (Fragment)	Collagen2c	NvCol2c	Core matrisome	Collagens	N0.HOG0000755	OG0000020	Cnidaria specific	Cnidaria specific	P08121.4	Collagen alpha-1(III) chain	0.498602	no hit	-0.461685	0.427723	0.955855	no hit	-0.052724	0.92633	0.552274	no hit	-0.408961	0.480427
NV2t024536001.1	https://simrbase.stowers.org/feature/Nematostella/vectensis/mRNA/NV2t024536001.1	NV2.24536	NV2t024536001.1	Collagen5	NvCol5	Core matrisome	Collagens					Q9JI03.1	Collagen alpha-1(V) chain
NV2t024375002.1	https://simrbase.stowers.org/feature/Nematostella/vectensis/mRNA/NV2t024375002.1	NV2.24375	type V alpha 1	Collagen-7	NvCol-7	Core matrisome	Collagens	N0.HOG0000751	OG0000020			P20909.2	Collagen alpha-1(XI) chain
NV2t005987001.1	https://simrbase.stowers.org/feature/Nematostella/vectensis/mRNA/NV2t005987001.1	NV2.5987	collagen alpha-1 XXIII chain-like	Collagen-like-1	NvCol-like-1	Core matrisome	Collagens	N0.HOG0003082	OG0002019	Cnidaria specific	Cnidaria specific	P32017.1	Collagen alpha-3(IX) chain
NV2t013883004.1	https://simrbase.stowers.org/feature/Nematostella/vectensis/mRNA/NV2t013883004.1	NV2.13883	mRNA	Collagen-like-10	NvCol-like-10	Core matrisome	Collagens	N0.HOG0001327	OG0000272	Cnidaria specific	Cnidaria specific	P05997.3	Collagen alpha-2(V) chain	0.0373416	candidate	-0.698236	0.0198582	0.27219	no hit	-0.372764	0.159702	0.278172	no hit	-0.325472	0.212858
NV2t019801001.1	https://simrbase.stowers.org/feature/Nematostella/vectensis/mRNA/NV2t019801001.1	NV2.19801	Collagen-like protein 6	Collagen-like-2	NvCol-like-2	Core matrisome	Collagens	N0.HOG0001302	OG0000250	Cnidaria specific	Cnidaria specific	Q5UPS6.1	No description found
NV2t021821001.1	https://simrbase.stowers.org/feature/Nematostella/vectensis/mRNA/NV2t021821001.1	NV2.21821	Collagen triple helix repeat-containing protein 1	Collagen-like-3	NvCol-like-3	Core matrisome	Collagens					Q17RW2.2	Collagen alpha-1(XXIV) chain
NV2t021793001.1	https://simrbase.stowers.org/feature/Nematostella/vectensis/mRNA/NV2t021793001.1	NV2.21793	C1q and TNF related	Collagen-like-4	NvCol-like-4	Core matrisome	Collagens	N0.HOG0001943	OG0000880	Cnidaria specific	Cnidaria specific	Q96CG8.1	Collagen triple helix repeat-containing protein 1
NV2t019798001.1	https://simrbase.stowers.org/feature/Nematostella/vectensis/mRNA/NV2t019798001.1	NV2.19798	scavenger receptor class A member 5	Collagen-like-5	NvCol-like-5	Core matrisome	Collagens	N0.HOG0001381	OG0000320	Cnidaria specific	Cnidaria specific	No hit	No hit
NV2t019811001.1	https://simrbase.stowers.org/feature/Nematostella/vectensis/mRNA/NV2t019811001.1	NV2.19811	Collagen alpha-5(VI) chain	Collagen-like-6	NvCol-like-6	Core matrisome	Collagens	N0.HOG0001302	OG0000250	Cnidaria specific	Cnidaria specific	No hit	No hit
NV2t020296001.1	https://simrbase.stowers.org/feature/Nematostella/vectensis/mRNA/NV2t020296001.1	NV2.20296	scavenger receptor class A member 5	Collagen-like-7	NvCol-like-7	Core matrisome	Collagens	N0.HOG0001381	OG0000320	Cnidaria specific	Cnidaria specific	Q9C0J8.2	pre-mRNA 3' end processing protein WDR33
NV2t007052001.1	https://simrbase.stowers.org/feature/Nematostella/vectensis/mRNA/NV2t007052001.1	NV2.7052	mRNA	Collagen-like-8	NvCol-like-8	Core matrisome	Collagens	N0.HOG0000845	OG0000032	Cnidaria specific	Cnidaria specific	P18503.1	No description found	0.0290651	candidate	-0.674428	0.0145469	0.0184101	candidate	-0.876954	0.00376105	0.451734	no hit	0.202526	0.377764
NV2t008768001.1	https://simrbase.stowers.org/feature/Nematostella/vectensis/mRNA/NV2t008768001.1	NV2.8768	Col_cuticle_N domain-containing protein	Collagen-like-9	NvCol-like-9	Core matrisome	Collagens	N0.HOG0002603	OG0001540	Cnidaria specific	Cnidaria specific	Q63870.3	Collagen alpha-1(VII) chain	0.0142718	hit	1.2582	0.00607233	0.000891362	hit	-2.87225	3.03614e-05	5.82925e-05	hit	4.13044	2.04448e-06
NV2t011814001.1	https://simrbase.stowers.org/feature/Nematostella/vectensis/mRNA/NV2t011814001.1	NV2.11814	pericardin	Minicollagen-7	NvNcol-7	Core matrisome	Collagens	N0.HOG0001363	OG0000302	Cnidaria specific	Cnidaria specific	Q28247.2	Collagen alpha-5(IV) chain
NV2t012621001.1	https://simrbase.stowers.org/feature/Nematostella/vectensis/mRNA/NV2t012621001.1	NV2.12621	keratin-associated protein	Minicollagen NvNCol-1	NvNCol1	Core matrisome	Collagens	N0.HOG0001391	OG0000330	Cnidaria specific	Cnidaria specific	No hit	No hit
NV2t011801001.1	https://simrbase.stowers.org/feature/Nematostella/vectensis/mRNA/NV2t011801001.1	NV2.11801	predicted protein	Minicollagen NvNCol-4	NvNCol4	Core matrisome	Collagens					No hit	No hit
NV2t011802002.1	https://simrbase.stowers.org/feature/Nematostella/vectensis/mRNA/NV2t011802002.1	NV2.11802	hypothetical protein	Minicollagen NvNCol-5	NvNCol5	Core matrisome	Collagens	N0.HOG0002609	OG0001546	Cnidaria specific	Cnidaria specific	No hit	No hit
NV2t011815001.1	https://simrbase.stowers.org/feature/Nematostella/vectensis/mRNA/NV2t011815001.1	NV2.11815	FBtr0086997	Minicollagen NvNCol-6	NvNCol6	Core matrisome	Collagens	N0.HOG0003060	OG0001997	Cnidaria specific	Cnidaria specific	No hit	No hit
NV2t010686001.1	https://simrbase.stowers.org/feature/Nematostella/vectensis/mRNA/NV2t010686001.1	NV2.10686	mRNA	Minicollagen-3 (fragment)	NvNCol-3	Core matrisome	Collagens					No hit	No hit
NV2t000363001.1	https://simrbase.stowers.org/feature/Nematostella/vectensis/mRNA/NV2t000363001.1	NV2.363	mRNA	Minicollagen-like-1	NvNCol-like-1	Core matrisome	Collagens	N0.HOG0003077	OG0002014	Cnidaria specific	Cnidaria specific	No hit	No hit
NV2t011816001.1	https://simrbase.stowers.org/feature/Nematostella/vectensis/mRNA/NV2t011816001.1	NV2.11816	FBtr0077220	Minicollagen-like-3	NvNCol-like 3	Core matrisome	Collagens					No hit	No hit
NV2t011818001.1	https://simrbase.stowers.org/feature/Nematostella/vectensis/mRNA/NV2t011818001.1	NV2.11818	Collagen-like protein	Minicollagen-like-4	NvNCol-like 4	Core matrisome	Collagens					P12108.3	Collagen alpha-2(IX) chain
NV2t007278001.1	https://simrbase.stowers.org/feature/Nematostella/vectensis/mRNA/NV2t007278001.1	NV2.7278	Short-chain collagen C4 (Fragment)	Spongin-like-1	NvSpongin-like-1	Core matrisome	Collagens	N0.HOG0000842	OG0000032			P18503.1	No description found	0.0120398	hit	-1.36093	0.00485952	0.89399	no hit	-0.0732356	0.840625	0.0145663	hit	-1.2877	0.00653349
NV2t007899001.1	https://simrbase.stowers.org/feature/Nematostella/vectensis/mRNA/NV2t007899001.1	NV2.7899	Short-chain collagen C4 (Fragment)	Spongin-like-2	NvSpongin-like-2	Core matrisome	Collagens	N0.HOG0000846	OG0000032			P18503.1	No description found	0.000254983	hit	-1.82254	6.52644e-06	0.0561823	no hit	-0.517741	0.0182518	0.000502727	hit	-1.3048	7.42449e-05
NV2t008393003.1	https://simrbase.stowers.org/feature/Nematostella/vectensis/mRNA/NV2t008393003.1	NV2.8393	Short-chain collagen C4 (Fragment)	Spongin-like-3	NvSpongin-like-3	Core matrisome	Collagens	N0.HOG0000843	OG0000032	Cnidaria specific	Cnidaria specific	P18503.1	No description found
NV2t008836001.1	https://simrbase.stowers.org/feature/Nematostella/vectensis/mRNA/NV2t008836001.1	NV2.8836	Short-chain collagen C4 (Fragment)	Spongin-like-4	NvSpongin-like-4	Core matrisome	Collagens	N0.HOG0000842	OG0000032			P18503.1	No description found
NV2t014093001.1	https://simrbase.stowers.org/feature/Nematostella/vectensis/mRNA/NV2t014093001.1	NV2.14093	agrin	Agrin-related-1	NvArgn-1	Core matrisome	ECM Glycoproteins	N0.HOG0000597	OG0000010			O00468.6	Agrin	0.000989461	hit	-1.51917	0.000132474	0.481862	no hit	0.222671	0.343726	0.000387	hit	-1.74184	5.06504e-05
NV2t013522001.1	https://simrbase.stowers.org/feature/Nematostella/vectensis/mRNA/NV2t013522001.1	NV2.13522	Follistatin	Agrin-related-2	NvArgn-2	Core matrisome	ECM Glycoproteins	N0.HOG0000597	OG0000010			P25304.2	Agrin
NV2t008096001.1	https://simrbase.stowers.org/feature/Nematostella/vectensis/mRNA/NV2t008096001.1	NV2.8096	leucine-rich repeat LGI family member	Thrombospondin type laminin G domain and EAR repeats	NvTSPEAR	Core matrisome	ECM Glycoproteins	N0.HOG0001411	OG0000350			J3S6Y1.1	Thrombospondin-type laminin G domain and EAR repeat-containing protein	0.00704199	candidate	-0.735849	0.00242587	0.455705	no hit	0.178976	0.319341	0.00234838	candidate	-0.914826	0.000637359
NV2t009101001.1	https://simrbase.stowers.org/feature/Nematostella/vectensis/mRNA/NV2t009101001.1	NV2.9101	Hemicentin-2	Collagen and Ig domain-containing protein	NvColIg	Core matrisome	ECM Glycoproteins	N0.HOG0001196	OG0000161	Cnidaria specific	Cnidaria specific	Q92626.2	Peroxidasin homolog
NV2t002667001.1	https://simrbase.stowers.org/feature/Nematostella/vectensis/mRNA/NV2t002667001.1	NV2.2667	collagen triple helix repeat-containing protein	Collagen triple helix repeat-containing protein 1-like	NvCTHRC	Core matrisome	ECM Glycoproteins	N0.HOG0000849	OG0000033			Q9D1D6.2	Collagen triple helix repeat-containing protein 1	0.0249498	candidate	-0.710367	0.0120696	0.0167522	candidate	-0.910395	0.00327194	0.463246	no hit	0.200028	0.389123
NV2t014958001.1	https://simrbase.stowers.org/feature/Nematostella/vectensis/mRNA/NV2t014958001.1	NV2.14958	MAM and LDL-receptor class A domain-containing protein 2 (Fragment)	Deleted in malignant brain tumors 1 protein-like-1	NvDMBT-1	Core matrisome	ECM Glycoproteins	N0.HOG0000727	OG0000018			B3EWZ5.1	MAM and LDL-receptor class A domain-containing protein 1	0.536162	no hit	0.144523	0.466384	0.000284386	hit	-2.16607	3.19157e-06	5.81764e-05	hit	2.31059	1.95792e-06
NV2t024741002.1	https://simrbase.stowers.org/feature/Nematostella/vectensis/mRNA/NV2t024741002.1	NV2.24741	Macrophage scavenger receptor types I and II	Deleted in malignant brain tumors 1 protein-like-2	NvDMBT-2	Core matrisome	ECM Glycoproteins	N0.HOG0000706	OG0000015			G8HTB6.1	ZP domain-containing protein
NV2t013059001.1	https://simrbase.stowers.org/feature/Nematostella/vectensis/mRNA/NV2t013059001.1	NV2.13059	A-kinase anchoring protein 12	Dentin sialophosphoprotein-like	NvDSPP	Core matrisome	ECM Glycoproteins	N0.HOG0001761	OG0000698			No hit	No hit
NV2t001116001.1	https://simrbase.stowers.org/feature/Nematostella/vectensis/mRNA/NV2t001116001.1	NV2.1116	Hemicentin-1	Discoidin and Ig domain-containing protein	NvDisc-Ig	Core matrisome	ECM Glycoproteins	N0.HOG0000576	OG0000010			Q96RW7.2	Hemicentin-1	0.850534	no hit	-0.0427122	0.819889	0.000766992	hit	-1.59735	2.27117e-05	0.000257466	hit	1.55464	2.76553e-05
NV2t012171001.1	https://simrbase.stowers.org/feature/Nematostella/vectensis/mRNA/NV2t012171001.1	NV2.12171	Lactadherin	Discoidin and SEA domain-containing protein	NvDisc-SEA	Core matrisome	ECM Glycoproteins	N0.HOG0000869	OG0000035	Cnidaria specific	Cnidaria specific	P70490.1	Lactadherin	0.000703401	hit	1.26041	7.32622e-05	0.000236009	hit	-2.12088	1.58075e-06	7.54877e-06	hit	3.38128	4.30849e-08
NV2t025722001.1	https://simrbase.stowers.org/feature/Nematostella/vectensis/mRNA/NV2t025722001.1	NV2.25722	sushi von Willebrand factor type A EGF and pentraxin domain-containing protein 1	Discoidin and Sushi domain repeat protein-1	NvDisc-Sushi-1	Core matrisome	ECM Glycoproteins	N0.HOG0000408	OG0000006			Q80T79.3	CUB and sushi domain-containing protein 3
NV2t025724001.1	https://simrbase.stowers.org/feature/Nematostella/vectensis/mRNA/NV2t025724001.1	NV2.25724	Complement factor H related 4	Discoidin and Sushi domain repeat protein-2	NvDisc-Sushi-2	Core matrisome	ECM Glycoproteins	N0.HOG0000408	OG0000006			Q80T79.3	CUB and sushi domain-containing protein 3
NV2t000997001.1	https://simrbase.stowers.org/feature/Nematostella/vectensis/mRNA/NV2t000997001.1	NV2.997	EGF-like repeat and discoidin I-like domain-containing protein 3	Discoidin domain repeat protein	NvDisc	Core matrisome	ECM Glycoproteins	N0.HOG0000875	OG0000035			O35474.2	EGF-like repeat and discoidin I-like domain-containing protein 3
NV2t009243001.1	https://simrbase.stowers.org/feature/Nematostella/vectensis/mRNA/NV2t009243001.1	NV2.9243	Protein jagged-1	DSL and vWFA domain-containing protein	NvDSLvWFA	Core matrisome	ECM Glycoproteins	N0.HOG0000979	OG0000062	Cnidaria specific	Cnidaria specific	P78504.3	Protein jagged-1	0.0071827	hit	-1.52355	0.0025003	0.276779	no hit	-0.53849	0.16343	0.041494	candidate	-0.98506	0.0230214
NV2t012181001.1	https://simrbase.stowers.org/feature/Nematostella/vectensis/mRNA/NV2t012181001.1	NV2.12181	Derived by automated computational analysis using gene prediction method Gnomon	EGF and Trimeric LpxA-like domain-containing protein	EGF-triLpxA	Core matrisome	ECM Glycoproteins	N0.HOG0000273	OG0000003			P98133.2	Fibrillin-1	0.000443763	hit	-2.23984	3.02308e-05	0.741673	no hit	-0.127755	0.642375	0.000362236	hit	-2.11208	4.61261e-05
NV2t005962001.1	https://simrbase.stowers.org/feature/Nematostella/vectensis/mRNA/NV2t005962001.1	NV2.5962	Sushi	EGF repeat and pentraxin domain-containing protein-1	NvPolyEGF-PTX-1	Core matrisome	ECM Glycoproteins	N0.HOG0000499	OG0000008			P0C6B8.1	Sushi, von Willebrand factor type A, EGF and pentraxin domain-containing protein 1
NV2t023171001.1	https://simrbase.stowers.org/feature/Nematostella/vectensis/mRNA/NV2t023171001.1	NV2.23171	Fibropellin-1	EGF repeat and pentraxin domain-containing protein-2	NvPolyEGF-PTX-2	Core matrisome	ECM Glycoproteins	N0.HOG0001063	OG0000091			P10079.2	Fibropellin-1
NV2t017270001.1	https://simrbase.stowers.org/feature/Nematostella/vectensis/mRNA/NV2t017270001.1	NV2.17270	Multiple epidermal growth factor-like domains protein 6	EGF, Sushi and Ig domain-containing protein	NvPolyEGF-Sushi-Ig	Core matrisome	ECM Glycoproteins	N0.HOG0000883	OG0000036			O88281.1	Multiple epidermal growth factor-like domains protein 6	0.00402603	candidate	0.900634	0.00112402	0.000217454	hit	-2.36506	1.20775e-06	1.13273e-05	hit	3.26569	1.0032e-07
NV2t010398001.1	https://simrbase.stowers.org/feature/Nematostella/vectensis/mRNA/NV2t010398001.1	NV2.10398	Protocadherin Fat 4	EGF-like domain-containing protein-1	NvEGF-1	Core matrisome	ECM Glycoproteins	N0.HOG0000515	OG0000008			P82279.2	Protein crumbs homolog 1
NV2t020524001.1	https://simrbase.stowers.org/feature/Nematostella/vectensis/mRNA/NV2t020524001.1	NV2.20524	cadherin EGF LAG seven-pass G-type receptor	Adhesion G protein-coupled receptor E1-like	NvAdhGPCR-E1	Core matrisome	ECM Glycoproteins	N0.HOG0001276	OG0000225			P98133.2	Fibrillin-1
NV2t010636001.1	https://simrbase.stowers.org/feature/Nematostella/vectensis/mRNA/NV2t010636001.1	NV2.10636	Hemicentin-1	EGF-like repeat and discoidin domain-containing protein-1	NvPolyEGF-Disc-1	Core matrisome	ECM Glycoproteins	N0.HOG0001041	OG0000081			Q00918.1	Latent-transforming growth factor beta-binding protein 1
NV2t013422001.1	https://simrbase.stowers.org/feature/Nematostella/vectensis/mRNA/NV2t013422001.1	NV2.13422	Adhesion G protein-coupled receptor E2	EGF-like repeat and discoidin domain-containing protein-3	NvPolyEGF-Disc-3	Core matrisome	ECM Glycoproteins	N0.HOG0002229	OG0001166	Cnidaria specific	Cnidaria specific	Q5Y4N8.1	Adhesion G protein-coupled receptor E2	0.238138	no hit	-0.595941	0.179154	0.217825	no hit	-0.70913	0.117931	0.823728	no hit	0.11319	0.786765
NV2t013802001.1	https://simrbase.stowers.org/feature/Nematostella/vectensis/mRNA/NV2t013802001.1	NV2.13802	platelet endothelial aggregation receptor 1	EGF-like repeat and discoidin domain-containing protein-4	NvPolyEGF-Disc-4	Core matrisome	ECM Glycoproteins	N0.HOG0002229	OG0001166	Cnidaria specific	Cnidaria specific	Q8N2S1.2	Latent-transforming growth factor beta-binding protein 4	0.331122	no hit	0.369836	0.263516	0.871333	no hit	0.0764066	0.809994	0.441605	no hit	0.293429	0.367903
NV2t009055001.1	https://simrbase.stowers.org/feature/Nematostella/vectensis/mRNA/NV2t009055001.1	NV2.9055	Multiple epidermal growth factor-like domains protein 6	EGF-like repeat and discoidin domain-containing protein-8	NvPolyEGF-Disc-8	Core matrisome	ECM Glycoproteins	N0.HOG0001345	OG0000286	Cnidaria specific	Cnidaria specific	O88281.1	Multiple epidermal growth factor-like domains protein 6
NV2t006022001.1	https://simrbase.stowers.org/feature/Nematostella/vectensis/mRNA/NV2t006022001.1	NV2.6022	thrombospondin 2	EGF-like repeat domain-5	NvPolyEGF-5	Core matrisome	ECM Glycoproteins	N0.HOG0000491	OG0000008	Cnidaria specific	Cnidaria specific	P07207.3	Neurogenic locus Notch protein
NV2t024285001.1	https://simrbase.stowers.org/feature/Nematostella/vectensis/mRNA/NV2t024285001.1	NV2.24285	fibulin 5	EGF-like repeat domain-6	NvPolyEGF-6	Core matrisome	ECM Glycoproteins	N0.HOG0000509	OG0000008	Cnidaria specific	Cnidaria specific	P46531.4	Neurogenic locus notch homolog protein 1
NV2t024286001.1	https://simrbase.stowers.org/feature/Nematostella/vectensis/mRNA/NV2t024286001.1	NV2.24286	Neurogenic locus Notch protein	EGF-like repeat domain-7	NvPolyEGF-7	Core matrisome	ECM Glycoproteins	N0.HOG0000509	OG0000008	Cnidaria specific	Cnidaria specific	Q90Y54.1	Protein jagged-1b
NV2t023400001.1	https://simrbase.stowers.org/feature/Nematostella/vectensis/mRNA/NV2t023400001.1	NV2.23400	EGF-like domain-containing protein	EGF-like repeat domain-8	NvPolyEGF-8	Core matrisome	ECM Glycoproteins	N0.HOG0000441	OG0000007			Q9WVH8.1	Fibulin-5
NV2t019497002.1	https://simrbase.stowers.org/feature/Nematostella/vectensis/mRNA/NV2t019497002.1	NV2.19497	nephronectin	EGF-like repeat domain-9	NvPolyEGF-9	Core matrisome	ECM Glycoproteins	N0.HOG0000261	OG0000003			Q75N90.3	Fibrillin-3	0.00561317	hit	-1.53528	0.00176275	0.335835	no hit	-0.451001	0.212943	0.0234918	hit	-1.08428	0.0117066
NV2t003706001.1	https://simrbase.stowers.org/feature/Nematostella/vectensis/mRNA/NV2t003706001.1	NV2.3706	fibulin	EGF-like repeat protein-10	NvPolyEGF-10	Core matrisome	ECM Glycoproteins	N0.HOG0001501	OG0000438	Cnidaria specific	Cnidaria specific	Q61555.2	Fibrillin-2
NV2t006897002.1	https://simrbase.stowers.org/feature/Nematostella/vectensis/mRNA/NV2t006897002.1	NV2.6897	delta like non-canonical Notch ligand 1	EGF-like repeat protein-11	NvPolyEGF-11	Core matrisome	ECM Glycoproteins	N0.HOG0000235	OG0000003			Q61555.2	Fibrillin-2
NV2t007683001.1	https://simrbase.stowers.org/feature/Nematostella/vectensis/mRNA/NV2t007683001.1	NV2.7683	EGF-like domain-containing protein	EGF-like repeat protein-12	NvPolyEGF-12	Core matrisome	ECM Glycoproteins	N0.HOG0000287	OG0000003			P35555.4	Fibrillin-1
NV2t011904015.1	https://simrbase.stowers.org/feature/Nematostella/vectensis/mRNA/NV2t011904015.1	NV2.11904	Uromodulin	EGF-like repeat protein-13	NvPolyEGF-13	Core matrisome	ECM Glycoproteins	N0.HOG0000480	OG0000008			P07911.1	Uromodulin
NV2t017951001.1	https://simrbase.stowers.org/feature/Nematostella/vectensis/mRNA/NV2t017951001.1	NV2.17951	Crumbs cell polarity complex component	EGF-like repeat protein-14	NvPolyEGF-14	Core matrisome	ECM Glycoproteins	N0.HOG0000519	OG0000008			P49013.1	Fibropellin-3
NV2t023650001.1	https://simrbase.stowers.org/feature/Nematostella/vectensis/mRNA/NV2t023650001.1	NV2.23650	Fibropellin-3	EGF-like repeat protein-15	NvPolyEGF-15	Core matrisome	ECM Glycoproteins	N0.HOG0000499	OG0000008			P49013.1	Fibropellin-3
NV2t006034001.1	https://simrbase.stowers.org/feature/Nematostella/vectensis/mRNA/NV2t006034001.1	NV2.6034	domain-containing protein	EGF-like repeat protein-17,partial	NvPolyEGF-17	Core matrisome	ECM Glycoproteins	N0.HOG0000514	OG0000008			Q70E20.2	Sushi, nidogen and EGF-like domain-containing protein 1
NV2t006437001.1	https://simrbase.stowers.org/feature/Nematostella/vectensis/mRNA/NV2t006437001.1	NV2.6437	Neurogenic locus notch homolog protein 2	EGF-like repeat protein-18,partial	NvPolyEGF-18	Core matrisome	ECM Glycoproteins	N0.HOG0000469	OG0000008			O35516.2	Neurogenic locus notch homolog protein 2
NV2t024543001.1	https://simrbase.stowers.org/feature/Nematostella/vectensis/mRNA/NV2t024543001.1	NV2.24543	Protocadherin Fat 1	EGF-like repeat protein-20, partial	NvPolyEGF-20	Core matrisome	ECM Glycoproteins	N0.HOG0000496	OG0000008			P49013.1	Fibropellin-3
NV2t010668001.1	https://simrbase.stowers.org/feature/Nematostella/vectensis/mRNA/NV2t010668001.1	NV2.10668	mRNA	Elastin microfibril interfacer 1	NvEmilin1	Core matrisome	ECM Glycoproteins	N0.HOG0001286	OG0000235			No hit	No hit	0.00157239	hit	-1.61121	0.000283891	0.472597	no hit	0.269863	0.333954	0.000608331	hit	-1.88107	9.8278e-05
NV2t022931001.1	https://simrbase.stowers.org/feature/Nematostella/vectensis/mRNA/NV2t022931001.1	NV2.22931	latent transforming growth factor beta binding protein	Fibrillin	NvFbn	Core matrisome	ECM Glycoproteins	N0.HOG0000990	OG0000064			Q61555.2	Fibrillin-2	0.000238564	hit	-2.37352	5.02586e-06	0.713968	no hit	0.117655	0.607273	7.99767e-05	hit	-2.49118	3.49436e-06
NV2t022930001.1	https://simrbase.stowers.org/feature/Nematostella/vectensis/mRNA/NV2t022930001.1	NV2.22930	latent transforming growth factor beta binding protein 3	Fibrillin-like-1	NvFbn-1	Core matrisome	ECM Glycoproteins	N0.HOG0000989	OG0000064			Q61555.2	Fibrillin-2	0.000224712	hit	-2.48222	4.00758e-06	0.663409	no hit	0.142036	0.542326	6.49789e-05	hit	-2.62426	2.63445e-06
NV2t022932001.1	https://simrbase.stowers.org/feature/Nematostella/vectensis/mRNA/NV2t022932001.1	NV2.22932	Fibrillin 2b	Fibrillin-like-2	NvFbn-2	Core matrisome	ECM Glycoproteins					Q9TV36.1	Fibrillin-1	0.000729777	hit	-2.06823	7.88037e-05	0.528106	no hit	0.25418	0.389919	0.000294619	hit	-2.32241	3.44937e-05
NV2t014812001.1	https://simrbase.stowers.org/feature/Nematostella/vectensis/mRNA/NV2t014812001.1	NV2.14812	prion-like- Q/N-rich domain-bearing protein 25	Fibrillin-like-3	NvFbn-3	Core matrisome	ECM Glycoproteins	N0.HOG0000453	OG0000007			P35555.4	Fibrillin-1
NV2t010397002.1	https://simrbase.stowers.org/feature/Nematostella/vectensis/mRNA/NV2t010397002.1	NV2.10397	Fibropellin-3	Fibrinogen-like	NvFib-like	Core matrisome	ECM Glycoproteins	N0.HOG0000469	OG0000008			P49013.1	Fibropellin-3
NV2t003028001.1	https://simrbase.stowers.org/feature/Nematostella/vectensis/mRNA/NV2t003028001.1	NV2.3028	EGF containing fibulin extracellular matrix protein 1	Fibropellin-like-1	NvFp-like-1	Core matrisome	ECM Glycoproteins	N0.HOG0000277	OG0000003			P98133.2	Fibrillin-1
NV2t006439001.1	https://simrbase.stowers.org/feature/Nematostella/vectensis/mRNA/NV2t006439001.1	NV2.6439	Kunitz/Bovine pancreatic trypsin inhibitor domain protein	Fibropellin-like-2	NvFp-like-2	Core matrisome	ECM Glycoproteins	N0.HOG0000490	OG0000008	Cnidaria specific	Cnidaria specific	P10079.2	Fibropellin-1
NV2t010691002.1	https://simrbase.stowers.org/feature/Nematostella/vectensis/mRNA/NV2t010691002.1	NV2.10691	Notch	Fibropellin-like-3	NvFp-like-3	Core matrisome	ECM Glycoproteins	N0.HOG0000500	OG0000008			P10079.2	Fibropellin-1
NV2t005916001.1	https://simrbase.stowers.org/feature/Nematostella/vectensis/mRNA/NV2t005916001.1	NV2.5916	mucin 6 oligomeric mucus/gel-forming	Fibropellin-like-4	NvFp-like-4	Core matrisome	ECM Glycoproteins	N0.HOG0000492	OG0000008	Cnidaria specific	Cnidaria specific	Q01705.3	Neurogenic locus notch homolog protein 1
NV2t005917001.1	https://simrbase.stowers.org/feature/Nematostella/vectensis/mRNA/NV2t005917001.1	NV2.5917	Putative uncharacterized protein	Fibropellin-like-5	NvFp-like-5	Core matrisome	ECM Glycoproteins	N0.HOG0000487	OG0000008	Cnidaria specific	Cnidaria specific	P10079.2	Fibropellin-1	0.0575428	candidate	0.778495	0.0335921	0.0205157	hit	-1.19412	0.00439074	0.000961941	hit	1.97261	0.000193865
NV2t005918002.1	https://simrbase.stowers.org/feature/Nematostella/vectensis/mRNA/NV2t005918002.1	NV2.5918	Delta/notch like EGF repeat containing	Fibropellin-like-6	NvFp-like-6	Core matrisome	ECM Glycoproteins	N0.HOG0000491	OG0000008	Cnidaria specific	Cnidaria specific	P10079.2	Fibropellin-1	0.00023991	hit	2.20521	5.33162e-06	0.00418683	hit	-1.20465	0.00039218	1.51932e-05	hit	3.40986	1.91373e-07
NV2t006438001.1	https://simrbase.stowers.org/feature/Nematostella/vectensis/mRNA/NV2t006438001.1	NV2.6438	Fibropellin-1	Fibropellin-like-7	NvFp-like-7	Core matrisome	ECM Glycoproteins	N0.HOG0001502	OG0000439			P10079.2	Fibropellin-1
NV2t006441001.1	https://simrbase.stowers.org/feature/Nematostella/vectensis/mRNA/NV2t006441001.1	NV2.6441	Fibropellin-1	Fibropellin-like-8	NvFp-like-8	Core matrisome	ECM Glycoproteins	N0.HOG0000489	OG0000008	Cnidaria specific	Cnidaria specific	P10079.2	Fibropellin-1
NV2t025686001.1	https://simrbase.stowers.org/feature/Nematostella/vectensis/mRNA/NV2t025686001.1	NV2.25686	crumbs cell polarity complex component 2	Fibropellin-like-9	NvFp-like-9	Core matrisome	ECM Glycoproteins					P07207.3	Neurogenic locus Notch protein
NV2t003768001.1	https://simrbase.stowers.org/feature/Nematostella/vectensis/mRNA/NV2t003768001.1	NV2.3768	Fibrillin-3	Fibulin	NvFbln	Core matrisome	ECM Glycoproteins	N0.HOG0001130	OG0000123	Cnidaria specific	Cnidaria specific	P35556.3	Fibrillin-2	0.000397006	hit	-1.82708	2.28936e-05	0.64715	no hit	0.138778	0.523174	0.000169265	hit	-1.96586	1.3392e-05
NV2t013189001.1	https://simrbase.stowers.org/feature/Nematostella/vectensis/mRNA/NV2t013189001.1	NV2.13189	Fibulin-2	Fibulin-like	NvFbln-like	Core matrisome	ECM Glycoproteins	N0.HOG0000235	OG0000003			P35556.3	Fibrillin-2
NV2t023125001.1	https://simrbase.stowers.org/feature/Nematostella/vectensis/mRNA/NV2t023125001.1	NV2.23125	immunoglobulin superfamily member 22	Hemicentin 1-like-1	NvHmcn1-like 1	Core matrisome	ECM Glycoproteins	N0.HOG0000580	OG0000010			Q96RW7.2	Hemicentin-1	0.00256915	hit	-1.29417	0.000601442	0.267253	no hit	-0.370779	0.155385	0.0107375	candidate	-0.92339	0.00454353
NV2t024790001.1	https://simrbase.stowers.org/feature/Nematostella/vectensis/mRNA/NV2t024790001.1	NV2.24790	hemicentin-1	Hemicentin-1	NvHncn1	Core matrisome	ECM Glycoproteins	N0.HOG0000579	OG0000010			Q8NDA2.4	Hemicentin-2
NV2t010243001.1	https://simrbase.stowers.org/feature/Nematostella/vectensis/mRNA/NV2t010243001.1	NV2.10243	Sushi	Lactadherin-like-1	NvMFGE-like-1	Core matrisome	ECM Glycoproteins	N0.HOG0000470	OG0000008			A2AVA0.1	Sushi, von Willebrand factor type A, EGF and pentraxin domain-containing protein 1
NV2t010407001.1	https://simrbase.stowers.org/feature/Nematostella/vectensis/mRNA/NV2t010407001.1	NV2.10407	EGF-like repeat and discoidin I-like domain-containing protein 3	Lactadherin-like-2	NvMFGE-like-2	Core matrisome	ECM Glycoproteins	N0.HOG0001311	OG0000259			O35474.2	EGF-like repeat and discoidin I-like domain-containing protein 3
NV2t015715001.1	https://simrbase.stowers.org/feature/Nematostella/vectensis/mRNA/NV2t015715001.1	NV2.15715	Fibropellin-3	Lactadherin-like-3	NvMFGE-like-3	Core matrisome	ECM Glycoproteins	N0.HOG0000499	OG0000008			P49013.1	Fibropellin-3
NV2t015716001.1	https://simrbase.stowers.org/feature/Nematostella/vectensis/mRNA/NV2t015716001.1	NV2.15716	Fibropellin-1	Lactadherin-like-4	NvMFGE-like-4	Core matrisome	ECM Glycoproteins	N0.HOG0000499	OG0000008			P10079.2	Fibropellin-1
NV2t005960001.1	https://simrbase.stowers.org/feature/Nematostella/vectensis/mRNA/NV2t005960001.1	NV2.5960	Sushi	Lactadherin-like-5	NvMFGE-like-5	Core matrisome	ECM Glycoproteins	N0.HOG0000499	OG0000008			P0C6B8.1	Sushi, von Willebrand factor type A, EGF and pentraxin domain-containing protein 1
NV2t024158001.1	https://simrbase.stowers.org/feature/Nematostella/vectensis/mRNA/NV2t024158001.1	NV2.24158	laminin subunit gamma 3	Laminin subunit alpha-1	NvLamA1	Core matrisome	ECM Glycoproteins	N0.HOG0000128	OG0000001	Cnidaria specific	Cnidaria specific	P25391.2	Laminin subunit alpha-1
NV2t022840001.1	https://simrbase.stowers.org/feature/Nematostella/vectensis/mRNA/NV2t022840001.1	NV2.22840	laminin subunit alpha 1	Laminin subunit alpha-1-like	NvLamA1-like	Core matrisome	ECM Glycoproteins	N0.HOG0000129	OG0000001	Cnidaria specific	Cnidaria specific	Q21313.1	Laminin-like protein epi-1	0.000376242	hit	1.66494	1.95906e-05	0.00136917	hit	-1.4163	6.28111e-05	1.49816e-05	hit	3.08124	1.85759e-07
NV2t015818001.1	https://simrbase.stowers.org/feature/Nematostella/vectensis/mRNA/NV2t015818001.1	NV2.15818	laminin subunit alpha 4	laminin subunit alpha-2	NvLamA2	Core matrisome	ECM Glycoproteins	N0.HOG0000923	OG0000045			Q60675.2	Laminin subunit alpha-2	0.00495742	hit	-1.75467	0.00149262	0.00546826	hit	-2.02798	0.00060292	0.553492	no hit	0.273302	0.481705
NV2t017119001.1	https://simrbase.stowers.org/feature/Nematostella/vectensis/mRNA/NV2t017119001.1	NV2.17119	Laminin subunit alpha	Laminin subunit alpha-5	NvLamA5	Core matrisome	ECM Glycoproteins	N0.HOG0000916	OG0000045	Cnidaria specific	Cnidaria specific	Q21313.1	Laminin-like protein epi-1	0.0422548	candidate	-0.607322	0.0229612	0.626283	no hit	0.153033	0.499029	0.0170891	candidate	-0.760355	0.00793745
NV2t015819001.1	https://simrbase.stowers.org/feature/Nematostella/vectensis/mRNA/NV2t015819001.1	NV2.15819	laminin subunit	Laminin subunit alpha-like	NvLamA-like	Core matrisome	ECM Glycoproteins	N0.HOG0000915	OG0000045	Cnidaria specific	Cnidaria specific	Q00174.2	Laminin subunit alpha	0.00312395	hit	-1.74727	0.000789945	0.00994109	hit	-1.57589	0.00149929	0.679346	no hit	-0.171378	0.620612
NV2t001719001.1	https://simrbase.stowers.org/feature/Nematostella/vectensis/mRNA/NV2t001719001.1	NV2.1719	Laminin subunit	Laminin subunit beta-1-1	NvLamB1-1	Core matrisome	ECM Glycoproteins	N0.HOG0000050	OG0000001			P15800.1	Laminin subunit beta-2	0.00763464	hit	-1.72926	0.0026967	0.00398421	hit	-2.38649	0.000363199	0.196738	candidate	0.657228	0.142026
NV2t024496003.1	https://simrbase.stowers.org/feature/Nematostella/vectensis/mRNA/NV2t024496003.1	NV2.24496	Laminin subunit gamma-1	Laminin subunit beta-1-2	NvLamB1-2	Core matrisome	ECM Glycoproteins	N0.HOG0000125	OG0000001	Cnidaria specific	Cnidaria specific	A0JP86.1	Laminin subunit gamma-1
NV2t024823001.1	https://simrbase.stowers.org/feature/Nematostella/vectensis/mRNA/NV2t024823001.1	NV2.24823	Laminin EGF-like domain-containing protein	Laminin subunit beta-1-3, partial	NvLamB1-3	Core matrisome	ECM Glycoproteins	N0.HOG0003066	OG0002003	Cnidaria specific	Cnidaria specific	P07942.2	Laminin subunit beta-1
NV2t025732001.1	https://simrbase.stowers.org/feature/Nematostella/vectensis/mRNA/NV2t025732001.1	NV2.25732	Derived by automated computational analysis using gene prediction method Gnomon	Laminin subunit beta-2-1	NvLamB2-1	Core matrisome	ECM Glycoproteins	N0.HOG0000121	OG0000001	Cnidaria specific	Cnidaria specific	P15800.1	Laminin subunit beta-2
NV2t025734001.1	https://simrbase.stowers.org/feature/Nematostella/vectensis/mRNA/NV2t025734001.1	NV2.25734	laminin subunit beta 4	Laminin subunit beta-2-2	NvLamB2-2	Core matrisome	ECM Glycoproteins	N0.HOG0000120	OG0000001	Cnidaria specific	Cnidaria specific	Q61292.2	Laminin subunit beta-2
NV2t025737001.1	https://simrbase.stowers.org/feature/Nematostella/vectensis/mRNA/NV2t025737001.1	NV2.25737	laminin subunit gamma 1	Laminin subunit gamma-1	NvLamG	Core matrisome	ECM Glycoproteins	N0.HOG0000122	OG0000001			P11047.3	Laminin subunit gamma-1
NV2t000836001.1	https://simrbase.stowers.org/feature/Nematostella/vectensis/mRNA/NV2t000836001.1	NV2.836	eyes shut homolog	Matrilin-like-1	NvMatn-1	Core matrisome	ECM Glycoproteins	N0.HOG0000309	OG0000004	Cnidaria specific	Cnidaria specific	Q5GFL6.1	von Willebrand factor A domain-containing protein 2
NV2t000840001.1	https://simrbase.stowers.org/feature/Nematostella/vectensis/mRNA/NV2t000840001.1	NV2.840	matrilin 1	Matrilin-like-2	NvMatn-2	Core matrisome	ECM Glycoproteins	N0.HOG0001599	OG0000536	Cnidaria specific	Cnidaria specific	Q61982.1	Neurogenic locus notch homolog protein 3	0.0330646	no hit	0.534842	0.0169847	0.771906	no hit	-0.0763432	0.679046	0.0188366	candidate	0.611186	0.00894194
NV2t000841001.1	https://simrbase.stowers.org/feature/Nematostella/vectensis/mRNA/NV2t000841001.1	NV2.841	Collagen type VI alpha	Matrilin-like-3	NvMatn-3	Core matrisome	ECM Glycoproteins	N0.HOG0000309	OG0000004	Cnidaria specific	Cnidaria specific	P10079.2	Fibropellin-1
NV2t000842001.1	https://simrbase.stowers.org/feature/Nematostella/vectensis/mRNA/NV2t000842001.1	NV2.842	Collagen type VI alpha	Matrilin-like-4	NvMatn-4	Core matrisome	ECM Glycoproteins	N0.HOG0000309	OG0000004	Cnidaria specific	Cnidaria specific	P21941.1	Cartilage matrix protein
NV2t000843001.1	https://simrbase.stowers.org/feature/Nematostella/vectensis/mRNA/NV2t000843001.1	NV2.843	Cartilage matrix protein	Matrilin-like-5	NvMatn-5	Core matrisome	ECM Glycoproteins	N0.HOG0000309	OG0000004	Cnidaria specific	Cnidaria specific	P05099.2	Cartilage matrix protein
NV2t000845001.1	https://simrbase.stowers.org/feature/Nematostella/vectensis/mRNA/NV2t000845001.1	NV2.845	matrilin 2	Matrilin-like-6	NvMatn-6	Core matrisome	ECM Glycoproteins	N0.HOG0000309	OG0000004	Cnidaria specific	Cnidaria specific	O08746.2	Matrilin-2
NV2t018428001.1	https://simrbase.stowers.org/feature/Nematostella/vectensis/mRNA/NV2t018428001.1	NV2.18428	multiple epidermal growth factor-like domains protein	Matrilin-like-7	NvMatn-7	Core matrisome	ECM Glycoproteins	N0.HOG0000303	OG0000004	Cnidaria specific	Cnidaria specific	A2RUV0.2	Neurogenic locus notch homolog protein 1	0.224925	no hit	-0.368734	0.167398	0.00219023	hit	-1.66431	0.000133898	0.00254403	hit	1.29558	0.000710283
NV2t014418001.1	https://simrbase.stowers.org/feature/Nematostella/vectensis/mRNA/NV2t014418001.1	NV2.14418	Derived by automated computational analysis using gene prediction method Gnomo	Mega-Thrombospondin	NvMTSP	Core matrisome	ECM Glycoproteins	N0.HOG0000142	OG0000002	Cnidaria specific	Cnidaria specific	P35445.2	Cartilage oligomeric matrix protein	0.0142718	hit	1.17669	0.0060712	0.410868	no hit	-0.356332	0.277714	0.00381786	hit	1.53302	0.00121652
NV2t007038001.1	https://simrbase.stowers.org/feature/Nematostella/vectensis/mRNA/NV2t007038001.1	NV2.7038	angiopoietin-related protein	Microfibril-associated glycoprotein 4-like-1	NvMfap4-1	Core matrisome	ECM Glycoproteins	N0.HOG0000026	OG0000000			Q6AX44.1	No description found	0.0464244	no hit	-0.446047	0.0258675	0.0821458	no hit	-0.428093	0.0306604	0.931808	no hit	-0.0179546	0.915119
NV2t025470001.1	https://simrbase.stowers.org/feature/Nematostella/vectensis/mRNA/NV2t025470001.1	NV2.25470	Fibrinogen	Microfibril-associated glycoprotein 4-like-2	NvMfap4-2	Core matrisome	ECM Glycoproteins	N0.HOG0000024	OG0000000			Q15485.2	Ficolin-2
NV2t016067001.1	https://simrbase.stowers.org/feature/Nematostella/vectensis/mRNA/NV2t016067001.1	NV2.16067	Fibrinogen C-terminal domain-containing protein	Microfibril-associated glycoprotein 4-like-3	NvMfap4-3	Core matrisome	ECM Glycoproteins	N0.HOG0000024	OG0000000			P55083.2	Microfibril-associated glycoprotein 4
NV2t025464001.1	https://simrbase.stowers.org/feature/Nematostella/vectensis/mRNA/NV2t025464001.1	NV2.25464	ficolin 3	Microfibril-associated glycoprotein 4-like-4	NvMfap4-4	Core matrisome	ECM Glycoproteins	N0.HOG0000024	OG0000000			Q5I2E5.1	Ficolin-2
NV2t005873001.1	https://simrbase.stowers.org/feature/Nematostella/vectensis/mRNA/NV2t005873001.1	NV2.5873	angiopoietin like 7	Microfibril-associated glycoprotein 4-like-5	NvMfap4-5	Core matrisome	ECM Glycoproteins	N0.HOG0000008	OG0000000			Q5I2E5.1	Ficolin-2
NV2t008818001.1	https://simrbase.stowers.org/feature/Nematostella/vectensis/mRNA/NV2t008818001.1	NV2.8818	Contactin-associated protein-like 2	Microfibril-associated glycoprotein 4-like-6	NvMfap4-6	Core matrisome	ECM Glycoproteins	N0.HOG0000825	OG0000029			Q9CPW0.2	Contactin-associated protein-like 2
NV2t017967001.1	https://simrbase.stowers.org/feature/Nematostella/vectensis/mRNA/NV2t017967001.1	NV2.17967	Ficolin-1	Microfibril-associated glycoprotein 4-like-7	NvMfap4-7	Core matrisome	ECM Glycoproteins	N0.HOG0000032	OG0000000			Q9WTS8.2	Ficolin-1
NV2t013515001.1	https://simrbase.stowers.org/feature/Nematostella/vectensis/mRNA/NV2t013515001.1	NV2.13515	microfibril associated protein 1	Microfibrillar-associated protein 1	NvMfap1	Core matrisome	ECM Glycoproteins	N0.HOG0001185	OG0000156			Q5EA98.1	Microfibrillar-associated protein 1	0.00216098	hit	2.15681	0.000471851	0.134853	candidate	0.827658	0.060842	0.017364	hit	1.32915	0.00810277
NV2t007734001.1	https://simrbase.stowers.org/feature/Nematostella/vectensis/mRNA/NV2t007734001.1	NV2.7734	netrin 1	Netrin-1	NvNetr	Core matrisome	ECM Glycoproteins	N0.HOG0000122	OG0000001			O09118.3	Netrin-1
NV2t020722002.1	https://simrbase.stowers.org/feature/Nematostella/vectensis/mRNA/NV2t020722002.1	NV2.20722	Nidogen-1	Nidogen	NvNid	Core matrisome	ECM Glycoproteins	N0.HOG0000760	OG0000021			P07207.3	Neurogenic locus Notch protein	0.659464	no hit	-0.291144	0.599217	0.147013	candidate	-1.1178	0.0690343	0.217136	no hit	0.826652	0.159059
NV2t012221001.1	https://simrbase.stowers.org/feature/Nematostella/vectensis/mRNA/NV2t012221001.1	NV2.12221	Derived by automated computational analysis using gene prediction method Gnomon	NtA (N-terminal agrin) domain-containing protein	NvNtA	Core matrisome	ECM Glycoproteins	N0.HOG0001282	OG0000231			Q8N2E2.4	von Willebrand factor D and EGF domain-containing protein	0.78994	no hit	-0.126911	0.748724	0.135049	candidate	-0.833995	0.0611244	0.148627	candidate	0.707084	0.102053
NV2t006495001.1	https://simrbase.stowers.org/feature/Nematostella/vectensis/mRNA/NV2t006495001.1	NV2.6495	collagen type X alpha 1	Otolin-1-like	NvOto-like-1	Core matrisome	ECM Glycoproteins	N0.HOG0003083	OG0002020	Cnidaria specific	Cnidaria specific	C0HM84.1	Collagen, type I, alpha 1a	0.0559305	no hit	0.555341	0.0323861	0.970723	no hit	-0.0142894	0.948553	0.050903	no hit	0.56963	0.0292134
NV2t018957001.1	https://simrbase.stowers.org/feature/Nematostella/vectensis/mRNA/NV2t018957001.1	NV2.18957	Neuronal pentraxin-1	Pentraxin domain-containing protein-1	NvPtx-1	Core matrisome	ECM Glycoproteins	N0.HOG0001150	OG0000137			Q15818.2	Neuronal pentraxin-1
NV2t003861001.1	https://simrbase.stowers.org/feature/Nematostella/vectensis/mRNA/NV2t003861001.1	NV2.3861	Sushi	Pentraxin domain-containing protein-2	NvPtx-2	Core matrisome	ECM Glycoproteins					A2AVA0.1	Sushi, von Willebrand factor type A, EGF and pentraxin domain-containing protein 1
NV2t023776001.1	https://simrbase.stowers.org/feature/Nematostella/vectensis/mRNA/NV2t023776001.1	NV2.23776	Sushi	Pentraxin-related protein	NvPtx-related	Core matrisome	ECM Glycoproteins	N0.HOG0000282	OG0000003			P0C6B8.1	Sushi, von Willebrand factor type A, EGF and pentraxin domain-containing protein 1
NV2t020449001.1	https://simrbase.stowers.org/feature/Nematostella/vectensis/mRNA/NV2t020449001.1	NV2.20449	periostin	Periostin	NvPostn	Core matrisome	ECM Glycoproteins	N0.HOG0000885	OG0000037			Q62009.2	Periostin	0.000576645	hit	-1.72342	4.9842e-05	0.398518	no hit	-0.260409	0.267405	0.000844057	hit	-1.46301	0.00015715
NV2t013306001.1	https://simrbase.stowers.org/feature/Nematostella/vectensis/mRNA/NV2t013306001.1	NV2.13306	Peroxidasin homolog	Peroxidasin-related	NvPxdn	Core matrisome	ECM Glycoproteins	N0.HOG0001009	OG0000070			Q9VZZ4.1	Peroxidasin
NV2t000707001.1	https://simrbase.stowers.org/feature/Nematostella/vectensis/mRNA/NV2t000707001.1	NV2.707	neurexin 3	Pikachurin-like	NvPika	Core matrisome	ECM Glycoproteins	N0.HOG0000594	OG0000010			Q63HQ2.2	Pikachurin
NV2t003792001.1	https://simrbase.stowers.org/feature/Nematostella/vectensis/mRNA/NV2t003792001.1	NV2.3792	sushi von Willebrand factor type A EGF and pentraxin domain containing 1	Polydom1	NvPolydom1	Core matrisome	ECM Glycoproteins	N0.HOG0000405	OG0000006	Cnidaria specific	Cnidaria specific	P0C6B8.1	Sushi, von Willebrand factor type A, EGF and pentraxin domain-containing protein 1	0.000389249	hit	1.94344	2.16527e-05	0.00163007	hit	-1.61082	8.31243e-05	1.66415e-05	hit	3.55426	2.26436e-07
NV2t003300001.1	https://simrbase.stowers.org/feature/Nematostella/vectensis/mRNA/NV2t003300001.1	NV2.3300	sushi von Willebrand factor type A EGF and pentraxin domain containing 1	Polydom2	NvPolydom2	Core matrisome	ECM Glycoproteins	N0.HOG0000405	OG0000006	Cnidaria specific	Cnidaria specific	P0C6B8.1	Sushi, von Willebrand factor type A, EGF and pentraxin domain-containing protein 1	0.000774036	hit	1.58318	8.59073e-05	0.00143846	hit	-1.63764	6.76887e-05	2.4539e-05	hit	3.22081	4.39491e-07
NV2t003560001.1	https://simrbase.stowers.org/feature/Nematostella/vectensis/mRNA/NV2t003560001.1	NV2.3560	sushi von Willebrand factor type A EGF and pentraxin domain-containing protein	Polydom3	NvPolydom3	Core matrisome	ECM Glycoproteins	N0.HOG0000404	OG0000006	Cnidaria specific	Cnidaria specific	Q4LDE5.3	Sushi, von Willebrand factor type A, EGF and pentraxin domain-containing protein 1	0.000178018	hit	2.58323	2.0156e-06	0.00816091	hit	-1.05579	0.00110065	1.29679e-05	hit	3.63902	1.44893e-07
NV2t003561001.1	https://simrbase.stowers.org/feature/Nematostella/vectensis/mRNA/NV2t003561001.1	NV2.3561	selectin P	Polydom-like-1	NvPolydom-like-1	Core matrisome	ECM Glycoproteins	N0.HOG0001023	OG0000075	Cnidaria specific	Cnidaria specific	O88281.1	Multiple epidermal growth factor-like domains protein 6	0.00575012	candidate	0.969337	0.00183066	0.00100075	hit	-1.7375	3.75677e-05	5.01816e-05	hit	2.70684	1.39256e-06
NV2t002755001.1	https://simrbase.stowers.org/feature/Nematostella/vectensis/mRNA/NV2t002755001.1	NV2.2755	signal peptide CUB domain and EGF like domain containing 3	Polydom-like-2	NvPolydom-like-2	Core matrisome	ECM Glycoproteins	N0.HOG0001024	OG0000075			A0A1D5NSM8.1	Sushi, von Willebrand factor type A, EGF and pentraxin domain-containing protein 1	0.000485862	hit	1.88828	3.51076e-05	0.000408836	hit	-2.33813	7.32509e-06	9.97308e-06	hit	4.22641	7.91745e-08
NV2t002824002.1	https://simrbase.stowers.org/feature/Nematostella/vectensis/mRNA/NV2t002824002.1	NV2.2824	signal peptide CUB domain and EGF like domain containing 3	Polydom-like-3	NvPolydom-like-3	Core matrisome	ECM Glycoproteins	N0.HOG0001023	OG0000075	Cnidaria specific	Cnidaria specific	P98095.2	Fibulin-2	0.000319591	hit	1.67871	1.30882e-05	0.000217454	hit	-2.30573	1.20672e-06	6.3077e-06	hit	3.98445	1.738e-08
NV2t013340001.1	https://simrbase.stowers.org/feature/Nematostella/vectensis/mRNA/NV2t013340001.1	NV2.13340	Hemicentin-1	Polydom-like-4	NvPolydom-like-4	Core matrisome	ECM Glycoproteins	N0.HOG0001027	OG0000075	Cnidaria specific	Cnidaria specific	Q96RW7.2	Hemicentin-1	0.000230921	hit	2.64584	4.68299e-06	0.00307718	hit	-1.53451	0.000234234	1.29679e-05	hit	4.18035	1.41567e-07
NV2t011255001.1	https://simrbase.stowers.org/feature/Nematostella/vectensis/mRNA/NV2t011255001.1	NV2.11255	sushi von Willebrand factor type A EGF and pentraxin domain-containing protein	Polydom-related	NvPolydom-related	Core matrisome	ECM Glycoproteins	N0.HOG0000420	OG0000006			A2AVA0.1	Sushi, von Willebrand factor type A, EGF and pentraxin domain-containing protein 1	0.00778613	hit	2.10209	0.00276861	0.00577785	hit	-2.66573	0.000649568	0.000154913	hit	4.76782	1.12808e-05
NV2t024561001.1	https://simrbase.stowers.org/feature/Nematostella/vectensis/mRNA/NV2t024561001.1	NV2.24561	RING-type E3 ubiquitin transferase	Proline-rich fibronectin type 3 domain-containing protein	NvProFnt	Core matrisome	ECM Glycoproteins	N0.HOG0001129	OG0000122	Cnidaria specific	Cnidaria specific	No hit	No hit
NV2t023465002.1	https://simrbase.stowers.org/feature/Nematostella/vectensis/mRNA/NV2t023465002.1	NV2.23465	thrombospondin type-1 domain-containing protein	Properdin-like-1	NvCFP-1	Core matrisome	ECM Glycoproteins	N0.HOG0000211	OG0000002	Cnidaria specific	Cnidaria specific	Q96RW7.2	Hemicentin-1
NV2t017239001.1	https://simrbase.stowers.org/feature/Nematostella/vectensis/mRNA/NV2t017239001.1	NV2.17239	mRNA	Properdin-like-10	NvCFP-10	Core matrisome	ECM Glycoproteins	N0.HOG0000135	OG0000002			Q03350.2	Thrombospondin-2
NV2t017421001.1	https://simrbase.stowers.org/feature/Nematostella/vectensis/mRNA/NV2t017421001.1	NV2.17421	Hemicentin-1	Properdin-like-11	NvCFP-11	Core matrisome	ECM Glycoproteins	N0.HOG0000193	OG0000002	Cnidaria specific	Cnidaria specific	Q96RW7.2	Hemicentin-1	0.175381	no hit	0.541764	0.124759	0.00170913	hit	-2.28804	9.1194e-05	0.000216082	hit	2.8298	1.98967e-05
NV2t019412001.1	https://simrbase.stowers.org/feature/Nematostella/vectensis/mRNA/NV2t019412001.1	NV2.19412	TSP1_spondin domain-containing protein	Properdin-like-12	NvCFP-12	Core matrisome	ECM Glycoproteins	N0.HOG0000216	OG0000002	Cnidaria specific	Cnidaria specific	Q96RW7.2	Hemicentin-1
NV2t023447001.1	https://simrbase.stowers.org/feature/Nematostella/vectensis/mRNA/NV2t023447001.1	NV2.23447	Hemicentin-1	Properdin-like-13	NvCFP-13	Core matrisome	ECM Glycoproteins	N0.HOG0000211	OG0000002	Cnidaria specific	Cnidaria specific	Q96RW7.2	Hemicentin-1	0.00107473	hit	-1.23708	0.000154047	0.631926	no hit	0.128257	0.505864	0.000515569	hit	-1.36533	7.75138e-05
NV2t024746001.1	https://simrbase.stowers.org/feature/Nematostella/vectensis/mRNA/NV2t024746001.1	NV2.24746	Hemicentin-1	Properdin-like-14	NvCFP-14	Core matrisome	ECM Glycoproteins	N0.HOG0000216	OG0000002	Cnidaria specific	Cnidaria specific	D3YXG0.1	Hemicentin-1
NV2t025346001.1	https://simrbase.stowers.org/feature/Nematostella/vectensis/mRNA/NV2t025346001.1	NV2.25346	Hemicentin-1	Properdin-like-15	NvCFP-15	Core matrisome	ECM Glycoproteins	N0.HOG0000219	OG0000002			Q96RW7.2	Hemicentin-1
NV2t015937001.1	https://simrbase.stowers.org/feature/Nematostella/vectensis/mRNA/NV2t015937001.1	NV2.15937	Mucin-like protein (Fragment)	Properdin-like-2	NvCFP-2	Core matrisome	ECM Glycoproteins	N0.HOG0001955	OG0000892	Cnidaria specific	Cnidaria specific	B3EWY9.1	No description found
NV2t010038001.1	https://simrbase.stowers.org/feature/Nematostella/vectensis/mRNA/NV2t010038001.1	NV2.10038	Thrombospondin-2	Properdin-like-3	NvCFP-3	Core matrisome	ECM Glycoproteins	N0.HOG0000179	OG0000002			P35442.2	Thrombospondin-2	0.0103951	hit	-1.60482	0.00404424	0.552459	no hit	0.344778	0.416166	0.0040058	hit	-1.9496	0.00129504
NV2t011945001.1	https://simrbase.stowers.org/feature/Nematostella/vectensis/mRNA/NV2t011945001.1	NV2.11945	thrombospondin type 1 domain containing 7B	Properdin-like-4	NvCFP-4	Core matrisome	ECM Glycoproteins	N0.HOG0000203	OG0000002	Cnidaria specific	Cnidaria specific	D3YXG0.1	Hemicentin-1
NV2t013338003.1	https://simrbase.stowers.org/feature/Nematostella/vectensis/mRNA/NV2t013338003.1	NV2.13338	Hemicentin-1	Properdin-like-5	NvCFP-5	Core matrisome	ECM Glycoproteins	N0.HOG0001027	OG0000075	Cnidaria specific	Cnidaria specific	Q96RW7.2	Hemicentin-1
NV2t013919001.1	https://simrbase.stowers.org/feature/Nematostella/vectensis/mRNA/NV2t013919001.1	NV2.13919	Hemicentin-1	Properdin-like-6	NvCFP-6	Core matrisome	ECM Glycoproteins	N0.HOG0000216	OG0000002	Cnidaria specific	Cnidaria specific	Q96RW7.2	Hemicentin-1
NV2t013920001.1	https://simrbase.stowers.org/feature/Nematostella/vectensis/mRNA/NV2t013920001.1	NV2.13920	domain-containing protein	Properdin-like-7	NvCFP-7	Core matrisome	ECM Glycoproteins	N0.HOG0000216	OG0000002	Cnidaria specific	Cnidaria specific	D3YXG0.1	Hemicentin-1
NV2t015932001.1	https://simrbase.stowers.org/feature/Nematostella/vectensis/mRNA/NV2t015932001.1	NV2.15932	Mucin-like protein (Fragment)	Properdin-like-8	NvCFP-8	Core matrisome	ECM Glycoproteins					Q2PC93.1	SCO-spondin
NV2t015933001.1	https://simrbase.stowers.org/feature/Nematostella/vectensis/mRNA/NV2t015933001.1	NV2.15933	Hemicentin-1	Properdin-like-9	NvCFP-9	Core matrisome	ECM Glycoproteins	N0.HOG0000210	OG0000002	Cnidaria specific	Cnidaria specific	D3YXG0.1	Hemicentin-1
NV2t025658001.1	https://simrbase.stowers.org/feature/Nematostella/vectensis/mRNA/NV2t025658001.1	NV2.25658	crumbs	Protein Crumbs homolog-1	NvCrumbsh-1	Core matrisome	ECM Glycoproteins	N0.HOG0000498	OG0000008			P10079.2	Fibropellin-1
NV2t025685001.1	https://simrbase.stowers.org/feature/Nematostella/vectensis/mRNA/NV2t025685001.1	NV2.25685	crumbs cell polarity complex component 2	Protein Crumbs homolog-2	NvCrumbsh-2	Core matrisome	ECM Glycoproteins	N0.HOG0001293	OG0000241			P10079.2	Fibropellin-1
NV2t006047001.1	https://simrbase.stowers.org/feature/Nematostella/vectensis/mRNA/NV2t006047001.1	NV2.6047	eyes shut	Protein eyes shut homolog	NvEys	Core matrisome	ECM Glycoproteins	N0.HOG0000592	OG0000010			P10079.2	Fibropellin-1
NV2t002046001.1	https://simrbase.stowers.org/feature/Nematostella/vectensis/mRNA/NV2t002046001.1	NV2.2046	Fibropellin-3	SAM and EGF-like domain-containing protein	NvSAMEGF	Core matrisome	ECM Glycoproteins	N0.HOG0001779	OG0000716	Cnidaria specific	Cnidaria specific	P10079.2	Fibropellin-1	0.00506071	hit	-1.08536	0.00153545	0.0393325	candidate	-0.757701	0.0110775	0.255764	no hit	-0.327659	0.19254
NV2t017517001.1	https://simrbase.stowers.org/feature/Nematostella/vectensis/mRNA/NV2t017517001.1	NV2.17517	Golgi-associated plant pathogenesis-related protein 1	SCP and Thrombospondin type-1 domain-containing protein-1	NvSCP-TSR-1	Core matrisome	ECM Glycoproteins	N0.HOG0001183	OG0000155	Cnidaria specific	Cnidaria specific	Q9CYL5.3	Golgi-associated plant pathogenesis-related protein 1
NV2t017827001.1	https://simrbase.stowers.org/feature/Nematostella/vectensis/mRNA/NV2t017827001.1	NV2.17827	Golgi-associated plant pathogenesis-related protein 1	SCP and Thrombospondin type-1 domain-containing protein-2	NvSCP-TSR-2	Core matrisome	ECM Glycoproteins	N0.HOG0001183	OG0000155	Cnidaria specific	Cnidaria specific	Q9CYL5.3	Golgi-associated plant pathogenesis-related protein 1
NV2t018054001.1	https://simrbase.stowers.org/feature/Nematostella/vectensis/mRNA/NV2t018054001.1	NV2.18054	signal peptide CUB domain and EGF like domain containing 2	Signal peptide, CUB and EGF-like domain-containing protein-like	NvCUB_EGF	Core matrisome	ECM Glycoproteins	N0.HOG0000974	OG0000059			Q9JJS0.1	Signal peptide, CUB and EGF-like domain-containing protein 2
NV2t007952001.1	https://simrbase.stowers.org/feature/Nematostella/vectensis/mRNA/NV2t007952001.1	NV2.7952	glycoprotein Ib platelet subunit alpha	Slit homolog-like-1	NvSlit-like-1	Core matrisome	ECM Glycoproteins	N0.HOG0002235	OG0001172	Cnidaria specific	Cnidaria specific	No hit	No hit
NV2t012458001.1	https://simrbase.stowers.org/feature/Nematostella/vectensis/mRNA/NV2t012458001.1	NV2.12458	Uromodulin	Slit homolog-like-2	NvSlit-like-2	Core matrisome	ECM Glycoproteins	N0.HOG0001762	OG0000699	Cnidaria specific	Cnidaria specific	P07911.1	Uromodulin
NV2t020861001.1	https://simrbase.stowers.org/feature/Nematostella/vectensis/mRNA/NV2t020861001.1	NV2.20861	Nidogen-2	Slit homolog-like-3	NvSlit-like-3	Core matrisome	ECM Glycoproteins	N0.HOG0000279	OG0000003			Q14112.3	Nidogen-2
NV2t021613001.1	https://simrbase.stowers.org/feature/Nematostella/vectensis/mRNA/NV2t021613001.1	NV2.21613	follistatin like 1	SPARC/BM-40 homolog	NvSPARC	Core matrisome	ECM Glycoproteins	N0.HOG0001405	OG0000344			Q58D84.1	Follistatin-related protein 1
NV2t011433001.1	https://simrbase.stowers.org/feature/Nematostella/vectensis/mRNA/NV2t011433001.1	NV2.11433	SPARC related modular calcium binding 1	SPARC-related modular calcium-binding protein 1	NvSPARC-related	Core matrisome	ECM Glycoproteins	N0.HOG0001071	OG0000095			Q9H4F8.1	SPARC-related modular calcium-binding protein 1
NV2t025124001.1	https://simrbase.stowers.org/feature/Nematostella/vectensis/mRNA/NV2t025124001.1	NV2.25124	complement C3d receptor 2	Sushi domain repeat protein-1	NvSushi-1	Core matrisome	ECM Glycoproteins	N0.HOG0000399	OG0000006			Q7Z407.3	CUB and sushi domain-containing protein 3
NV2t025727002.1	https://simrbase.stowers.org/feature/Nematostella/vectensis/mRNA/NV2t025727002.1	NV2.25727	complement C3b/C4b receptor 1 like	Sushi domain repeat protein-2	NvSushi-2	Core matrisome	ECM Glycoproteins	N0.HOG0000408	OG0000006			P0C6B8.1	Sushi, von Willebrand factor type A, EGF and pentraxin domain-containing protein 1
NV2t025725001.1	https://simrbase.stowers.org/feature/Nematostella/vectensis/mRNA/NV2t025725001.1	NV2.25725	Sushi von Willebrand factor type A EGF and pentraxi	Sushi domain repeat protein-3	NvSushi-3	Core matrisome	ECM Glycoproteins	N0.HOG0000408	OG0000006			A0A1D5NSM8.1	Sushi, von Willebrand factor type A, EGF and pentraxin domain-containing protein 1
NV2t024979002.1	https://simrbase.stowers.org/feature/Nematostella/vectensis/mRNA/NV2t024979002.1	NV2.24979	complement factor H	Sushi domain repeat protein-4	NvSushi-4	Core matrisome	ECM Glycoproteins	N0.HOG0000399	OG0000006			Q7Z407.3	CUB and sushi domain-containing protein 3
NV2t024371001.1	https://simrbase.stowers.org/feature/Nematostella/vectensis/mRNA/NV2t024371001.1	NV2.24371	mRNA	Sushi domain repeat protein-5	NvSushi-5	Core matrisome	ECM Glycoproteins	N0.HOG0001776	OG0000713	Cnidaria specific	Cnidaria specific	A2AVA0.1	Sushi, von Willebrand factor type A, EGF and pentraxin domain-containing protein 1
NV2t015519002.1	https://simrbase.stowers.org/feature/Nematostella/vectensis/mRNA/NV2t015519002.1	NV2.15519	Thrombospondin-1	Sushi-Thrombospondin	NvSushiTSP	Core matrisome	ECM Glycoproteins	N0.HOG0000146	OG0000002	Cnidaria specific	Cnidaria specific	P07996.2	Thrombospondin-1
NV2t023274001.1	https://simrbase.stowers.org/feature/Nematostella/vectensis/mRNA/NV2t023274001.1	NV2.23274	Derived by automated computational analysis using gene prediction method Gnomon	Tenascin-related	NvTens	Core matrisome	ECM Glycoproteins	N0.HOG0000892	OG0000039			P21783.3	Neurogenic locus notch homolog protein 1	0.0412723	no hit	-0.481716	0.0222654	0.116121	no hit	-0.393298	0.0497955	0.676586	no hit	-0.0884186	0.617505
NV2t023884001.1	https://simrbase.stowers.org/feature/Nematostella/vectensis/mRNA/NV2t023884001.1	NV2.23884	thrombospondin-3b-like	Thrombospondin-1	NvTSP-1	Core matrisome	ECM Glycoproteins	N0.HOG0000139	OG0000002	Cnidaria specific	Cnidaria specific	P35443.2	Thrombospondin-4	0.00103808	hit	-1.30668	0.000143684	0.183637	no hit	-0.366927	0.0933191	0.00388046	candidate	-0.939754	0.00124399
NV2t023886001.1	https://simrbase.stowers.org/feature/Nematostella/vectensis/mRNA/NV2t023886001.1	NV2.23886	Thrombospondin	Thrombospondin-2	NvTSP-2	Core matrisome	ECM Glycoproteins	N0.HOG0000149	OG0000002			P35443.2	Thrombospondin-4
NV2t017626001.1	https://simrbase.stowers.org/feature/Nematostella/vectensis/mRNA/NV2t017626001.1	NV2.17626	SH3 domain-containing protein	Thyroglobin domain-containing protein	NvThyrd	Core matrisome	ECM Glycoproteins	N0.HOG0001778	OG0000715	Cnidaria specific	Cnidaria specific	No hit	No hit
NV2t014419001.1	https://simrbase.stowers.org/feature/Nematostella/vectensis/mRNA/NV2t014419001.1	NV2.14419	WAP	Thyroglobin repeat protein-1	NvThyr-1	Core matrisome	ECM Glycoproteins	N0.HOG0000800	OG0000024			Q8TEU8.1	WAP, Kazal, immunoglobulin, Kunitz and NTR domain-containing protein 2	0.000774036	hit	-1.59477	8.60624e-05	0.454779	no hit	0.232359	0.318318	0.000284154	hit	-1.82713	3.26601e-05
NV2t014040001.1	https://simrbase.stowers.org/feature/Nematostella/vectensis/mRNA/NV2t014040001.1	NV2.14040	Derived by automated computational analysis using gene prediction method Gnomon	Thyroglobin repeat protein-2	NvThyr-2	Core matrisome	ECM Glycoproteins	N0.HOG0000800	OG0000024			P81439.2	Equistatin	0.000602769	hit	-1.72547	5.41348e-05	0.00531779	hit	-1.2195	0.000576905	0.0832264	no hit	-0.505978	0.0516408
NV2t019319002.1	https://simrbase.stowers.org/feature/Nematostella/vectensis/mRNA/NV2t019319002.1	NV2.19319	Derived by automated computational analysis using gene prediction method Gnomon	Thyroglobin repeat protein-3	NvThyr-3	Core matrisome	ECM Glycoproteins	N0.HOG0000800	OG0000024			P81439.2	Equistatin	0.472545	no hit	0.136783	0.400067	0.000475701	hit	-1.52694	9.39163e-06	9.53481e-05	hit	1.66372	4.95412e-06
NV2t014919002.1	https://simrbase.stowers.org/feature/Nematostella/vectensis/mRNA/NV2t014919002.1	NV2.14919	Hemicentin-1	TLDc domain-containing Thrombospondin type-1 repeat protein	NvTSR	Core matrisome	ECM Glycoproteins	N0.HOG0000193	OG0000002	Cnidaria specific	Cnidaria specific	Q96RW7.2	Hemicentin-1	0.680606	no hit	-0.17022	0.623788	0.00136917	hit	-2.54995	6.26804e-05	0.000623634	hit	2.37973	0.000101921
NV2t003437001.1	https://simrbase.stowers.org/feature/Nematostella/vectensis/mRNA/NV2t003437001.1	NV2.3437	periostin	Transforming growth factor-beta-induced protein ig-h3-1	NvTGFbIP-1	Core matrisome	ECM Glycoproteins	N0.HOG0000885	OG0000037			Q15582.1	Transforming growth factor-beta-induced protein ig-h3
NV2t002361003.1	https://simrbase.stowers.org/feature/Nematostella/vectensis/mRNA/NV2t002361003.1	NV2.2361	Transforming growth factor-beta-induced protein ig-h3	Transforming growth factor-beta-induced protein ig-h3-2	NvTGFbIP-2	Core matrisome	ECM Glycoproteins	N0.HOG0000886	OG0000037			P82198.1	Transforming growth factor-beta-induced protein ig-h3
NV2t011419002.1	https://simrbase.stowers.org/feature/Nematostella/vectensis/mRNA/NV2t011419002.1	NV2.11419	Collagen alpha-1(IV) chain	Trimeric LpxA-like domain-containing collagen	NvLpxACol	Core matrisome	ECM Glycoproteins					No hit	No hit	0.000205506	hit	-2.45014	2.63002e-06	0.0023174	hit	-1.40869	0.000147375	0.00345953	hit	-1.04145	0.00107306
NV2t017583002.1	https://simrbase.stowers.org/feature/Nematostella/vectensis/mRNA/NV2t017583002.1	NV2.17583	mRNA	Thrombospondin type-1 domain-containing protein-3	NvTSRd-3	Core matrisome	ECM Glycoproteins	N0.HOG0002241	OG0001178			No hit	No hit
NV2t010387001.1	https://simrbase.stowers.org/feature/Nematostella/vectensis/mRNA/NV2t010387001.1	NV2.10387	Adipocyte enhancer-binding protein 1	Thrombospondin type-1 and discoidin domain-containing protein	NvTSRDisc	Core matrisome	ECM Glycoproteins	N0.HOG0000872	OG0000035	Cnidaria specific	Cnidaria specific	Q8IUX7.1	Adipocyte enhancer-binding protein 1
NV2t000737001.1	https://simrbase.stowers.org/feature/Nematostella/vectensis/mRNA/NV2t000737001.1	NV2.737	Hemicentin-1	Thrombospondin type-1 domain-containing protein-1	NvTSR-1	Core matrisome	ECM Glycoproteins	N0.HOG0000188	OG0000002			D3YXG0.1	Hemicentin-1	0.00155683	hit	1.2756	0.000273419	0.0163961	candidate	-0.861816	0.00315587	0.000115853	hit	2.13742	6.88596e-06
NV2t002780001.1	https://simrbase.stowers.org/feature/Nematostella/vectensis/mRNA/NV2t002780001.1	NV2.2780	Hemicentin-1	Thrombospondin type-1 domain-containing protein-2	NvTSR-2	Core matrisome	ECM Glycoproteins	N0.HOG0000188	OG0000002			Q96RW7.2	Hemicentin-1	0.000243635	hit	1.94844	5.90019e-06	0.000152706	hit	-2.75773	4.20927e-07	4.9149e-06	hit	4.70617	6.523e-09
NV2t003202001.1	https://simrbase.stowers.org/feature/Nematostella/vectensis/mRNA/NV2t003202001.1	NV2.3202	Hemicentin-1	Thrombospondin type-1 domain-containing protein-3	NvTSR-3	Core matrisome	ECM Glycoproteins	N0.HOG0001027	OG0000075	Cnidaria specific	Cnidaria specific	Q96RW7.2	Hemicentin-1	0.00264288	hit	1.24628	0.000626507	0.0393325	candidate	-0.753906	0.0110671	0.000240098	hit	2.00018	2.39579e-05
NV2t020013002.1	https://simrbase.stowers.org/feature/Nematostella/vectensis/mRNA/NV2t020013002.1	NV2.20013	Usherin	Usherin	NvUsh	Core matrisome	ECM Glycoproteins	N0.HOG0000104	OG0000001			O75445.3	Usherin
NV2t020014001.1	https://simrbase.stowers.org/feature/Nematostella/vectensis/mRNA/NV2t020014001.1	NV2.20014	Usher syndrome 2A Autosomal recessive mild	Usherin-like	NvUsh-like	Core matrisome	ECM Glycoproteins	N0.HOG0000104	OG0000001			O75445.3	Usherin
NV2t009287001.1	https://simrbase.stowers.org/feature/Nematostella/vectensis/mRNA/NV2t009287001.1	NV2.9287	von Willebrand factor D and EGF domain-containing protein-like	von Willebrand factor D domain-containing protein-1	NvvWFD-1	Core matrisome	ECM Glycoproteins	N0.HOG0000840	OG0000031			Q6DFV8.2	von Willebrand factor D and EGF domain-containing protein
NV2t021786001.1	https://simrbase.stowers.org/feature/Nematostella/vectensis/mRNA/NV2t021786001.1	NV2.21786	von Willebrand factor D and EGF domain-containing protein	von Willebrand factor D domain-containing protein-2	NvvWFD-2	Core matrisome	ECM Glycoproteins	N0.HOG0000840	OG0000031			Q6DFV8.2	von Willebrand factor D and EGF domain-containing protein
NV2t003759001.1	https://simrbase.stowers.org/feature/Nematostella/vectensis/mRNA/NV2t003759001.1	NV2.3759	mRNA	vWFA and PAN/Apple domain-containing protein	NvvWFAPA	Core matrisome	ECM Glycoproteins	N0.HOG0002231	OG0001168	Cnidaria specific	Cnidaria specific	O35701.2	Matrilin-3
NV2t021576001.1	https://simrbase.stowers.org/feature/Nematostella/vectensis/mRNA/NV2t021576001.1	NV2.21576	Collagen alpha-4(VI) chain	vWFA and WSC domain-containing protein	NvvWFA-WSC	Core matrisome	ECM Glycoproteins	N0.HOG0000311	OG0000004	Cnidaria specific	Cnidaria specific	No hit	No hit	0.00404392	hit	-1.03811	0.00113061	0.000524918	hit	-2.01536	1.1782e-05	0.00480351	candidate	0.977252	0.00163552
NV2t008635001.1	https://simrbase.stowers.org/feature/Nematostella/vectensis/mRNA/NV2t008635001.1	NV2.8635	von Willebrand factor A domain containing 2	vWFA domain repeat protein	NvPolyvWFA	Core matrisome	ECM Glycoproteins	N0.HOG0000310	OG0000004	Cnidaria specific	Cnidaria specific	P12111.5	Collagen alpha-3(VI) chain	0.000668827	hit	1.40583	6.58872e-05	0.00018286	hit	-2.56662	7.56066e-07	6.36237e-06	hit	3.97246	2.55264e-08
NV2t008259001.1	https://simrbase.stowers.org/feature/Nematostella/vectensis/mRNA/NV2t008259001.1	NV2.8259	Collagen alpha-3(VI) chain	vWFA domain-containing glycine and glutamine-rich protein	NvvWFAGGP	Core matrisome	ECM Glycoproteins	N0.HOG0001435	OG0000373	Cnidaria specific	Cnidaria specific	No hit	No hit
NV2t000856001.1	https://simrbase.stowers.org/feature/Nematostella/vectensis/mRNA/NV2t000856001.1	NV2.856	Coadhesin (Fragment)	vWFA domain-containing protein-1	NvvWFA-1	Core matrisome	ECM Glycoproteins	N0.HOG0001235	OG0000188			B3EWZ3.1	No description found	0.345462	no hit	0.282787	0.277308	0.581949	no hit	0.193026	0.449113	0.766629	no hit	0.0897615	0.720911
NV2t009760001.1	https://simrbase.stowers.org/feature/Nematostella/vectensis/mRNA/NV2t009760001.1	NV2.9760	VWFA domain-containing protein	vWFA domain-containing protein-10	NvvWFA-10	Core matrisome	ECM Glycoproteins	N0.HOG0000309	OG0000004	Cnidaria specific	Cnidaria specific	P84552.2	Cochlin	0.177224	no hit	-0.546918	0.126337	0.379749	no hit	-0.397296	0.250175	0.708422	no hit	-0.149622	0.652931
NV2t009856002.1	https://simrbase.stowers.org/feature/Nematostella/vectensis/mRNA/NV2t009856002.1	NV2.9856	NV2t009856002.1	vWFA domain-containing protein-11	NvvWFA-11	Core matrisome	ECM Glycoproteins	N0.HOG0000315	OG0000004			Q80X19.2	Collagen alpha-1(XIV) chain	0.0262048	candidate	0.690644	0.0127954	0.00232189	hit	-1.46043	0.000148118	0.000138491	hit	2.15107	9.18982e-06
NV2t010017001.1	https://simrbase.stowers.org/feature/Nematostella/vectensis/mRNA/NV2t010017001.1	NV2.10017	Integrin alpha-X	vWFA domain-containing protein-12	NvvWFA-12	Core matrisome	ECM Glycoproteins	N0.HOG0001095	OG0000108			No hit	No hit	0.000615716	hit	1.50453	5.67489e-05	0.00736692	candidate	-0.98925	0.000952956	4.89026e-05	hit	2.49378	1.34745e-06
NV2t010983001.1	https://simrbase.stowers.org/feature/Nematostella/vectensis/mRNA/NV2t010983001.1	NV2.10983	VWFA domain-containing protein	vWFA domain-containing protein-13	NvvWFA-13	Core matrisome	ECM Glycoproteins	N0.HOG0001095	OG0000108			No hit	No hit	0.000318951	hit	-2.18613	1.29929e-05	0.311971	no hit	-0.327681	0.192563	0.000340393	hit	-1.85845	4.23397e-05
NV2t011796001.1	https://simrbase.stowers.org/feature/Nematostella/vectensis/mRNA/NV2t011796001.1	NV2.11796	Collagen alpha-1(XII) chain	vWFA domain-containing protein-14	NvvWFA-14	Core matrisome	ECM Glycoproteins	N0.HOG0000301	OG0000004	Cnidaria specific	Cnidaria specific	A2AX52.2	Collagen alpha-4(VI) chain
NV2t014073001.1	https://simrbase.stowers.org/feature/Nematostella/vectensis/mRNA/NV2t014073001.1	NV2.14073	Coadhesin (Fragment)	vWFA domain-containing protein-15	NvvWFA-15	Core matrisome	ECM Glycoproteins	N0.HOG0001277	OG0000226	Cnidaria specific	Cnidaria specific	B3EWZ3.1	No description found	0.000704841	hit	-1.51987	7.39674e-05	0.0403934	candidate	-0.665078	0.011508	0.00780344	candidate	-0.854793	0.00304397
NV2t014625001.1	https://simrbase.stowers.org/feature/Nematostella/vectensis/mRNA/NV2t014625001.1	NV2.14625	Collagen alpha-1(XII) chain	vWFA domain-containing protein-16	NvvWFA-16	Core matrisome	ECM Glycoproteins	N0.HOG0001773	OG0000710	Cnidaria specific	Cnidaria specific	Q80X19.2	Collagen alpha-1(XIV) chain
NV2t019051001.1	https://simrbase.stowers.org/feature/Nematostella/vectensis/mRNA/NV2t019051001.1	NV2.19051	VWFA domain-containing protein	vWFA domain-containing protein-17	NvvWFA-17	Core matrisome	ECM Glycoproteins	N0.HOG0001145	OG0000134			Q6GP15.1	Mediator of RNA polymerase II transcription subunit 25	0.08313	no hit	-0.36036	0.052032	0.385469	no hit	0.193471	0.255385	0.0172969	no hit	-0.553831	0.0080578
NV2t020167001.1	https://simrbase.stowers.org/feature/Nematostella/vectensis/mRNA/NV2t020167001.1	NV2.20167	inter-alpha-trypsin inhibitor heavy chain family member 6	vWFA domain-containing protein-18	NvvWFA-18	Core matrisome	ECM Glycoproteins	N0.HOG0000905	OG0000041			Q75WE7.1	von Willebrand factor A domain-containing protein 5A	0.45627	no hit	0.452547	0.383302	0.786309	no hit	0.198123	0.696888	0.676798	no hit	0.254424	0.618056
NV2t020559001.1	https://simrbase.stowers.org/feature/Nematostella/vectensis/mRNA/NV2t020559001.1	NV2.20559	Collagen alpha-1(XII) chain	vWFA domain-containing protein-19	NvvWFA-19	Core matrisome	ECM Glycoproteins	N0.HOG0001095	OG0000108			Q70UZ7.1	von Willebrand factor A domain-containing protein 2	0.34613	no hit	-0.202112	0.278049	0.864165	no hit	0.0460276	0.797639	0.253944	no hit	-0.24814	0.19097
NV2t010551001.1	https://simrbase.stowers.org/feature/Nematostella/vectensis/mRNA/NV2t010551001.1	NV2.10551	von Willebrand factor A domain-containing protein 2	vWFA domain-containing protein-2	NvvWFA-2	Core matrisome	ECM Glycoproteins	N0.HOG0001095	OG0000108			Q6DCQ6.1	von Willebrand factor A domain-containing protein 2	0.18444	no hit	-0.47718	0.132542	0.661804	no hit	-0.182186	0.540286	0.404485	no hit	-0.294994	0.330689
NV2t020560001.1	https://simrbase.stowers.org/feature/Nematostella/vectensis/mRNA/NV2t020560001.1	NV2.20560	mRNA	vWFA domain-containing protein-20	NvvWFA-20	Core matrisome	ECM Glycoproteins	N0.HOG0001095	OG0000108			P21941.1	Cartilage matrix protein	0.0514817	candidate	0.629579	0.0292125	0.0579006	candidate	0.696766	0.0189034	0.821549	no hit	-0.0671865	0.784199
NV2t021578001.1	https://simrbase.stowers.org/feature/Nematostella/vectensis/mRNA/NV2t021578001.1	NV2.21578	histidine rich glycoprotein	vWFA domain-containing protein-21	NvvWFA-21	Core matrisome	ECM Glycoproteins	N0.HOG0001314	OG0000262	Cnidaria specific	Cnidaria specific	No hit	No hit	0.064849	candidate	0.999522	0.0387127	0.0016148	hit	-2.97623	8.15022e-05	0.000145258	hit	3.97575	1.00345e-05
NV2t024204001.1	https://simrbase.stowers.org/feature/Nematostella/vectensis/mRNA/NV2t024204001.1	NV2.24204	Collagen alpha-1(XII) chain	vWFA domain-containing protein-22	NvvWFA-22	Core matrisome	ECM Glycoproteins	N0.HOG0000301	OG0000004	Cnidaria specific	Cnidaria specific	P13944.3	Collagen alpha-1(XII) chain
NV2t024227001.1	https://simrbase.stowers.org/feature/Nematostella/vectensis/mRNA/NV2t024227001.1	NV2.24227	Collagen alpha-1(XIV) chain	vWFA domain-containing protein-23	NvvWFA-23	Core matrisome	ECM Glycoproteins	N0.HOG0000301	OG0000004	Cnidaria specific	Cnidaria specific	P13944.3	Collagen alpha-1(XII) chain
NV2t024228001.1	https://simrbase.stowers.org/feature/Nematostella/vectensis/mRNA/NV2t024228001.1	NV2.24228	cartilage matrix protein	vWFA domain-containing protein-24	NvvWFA-24	Core matrisome	ECM Glycoproteins	N0.HOG0000301	OG0000004	Cnidaria specific	Cnidaria specific	Q21540.2	Cuticlin-6
NV2t014076001.1	https://simrbase.stowers.org/feature/Nematostella/vectensis/mRNA/NV2t014076001.1	NV2.14076	Collagen type VI alpha 3	vWFA domain-containing protein-3	NvvWFA-3	Core matrisome	ECM Glycoproteins	N0.HOG0001235	OG0000188			B3EWZ3.1	No description found	0.000799812	hit	-1.56391	8.99179e-05	0.0275172	candidate	-0.786211	0.00656125	0.015332	candidate	-0.777695	0.0069463
NV2t014087001.1	https://simrbase.stowers.org/feature/Nematostella/vectensis/mRNA/NV2t014087001.1	NV2.14087	Coadhesin (Fragment)	vWFA domain-containing protein-4	NvvWFA-4	Core matrisome	ECM Glycoproteins	N0.HOG0001235	OG0000188			B3EWZ3.1	No description found	0.00178581	hit	-1.6451	0.000346333	0.214397	no hit	-0.48794	0.115282	0.00786015	hit	-1.15716	0.00306919
NV2t001044001.1	https://simrbase.stowers.org/feature/Nematostella/vectensis/mRNA/NV2t001044001.1	NV2.1044	Matrilin-2	vWFA domain-containing protein-5	NvvWFA-5	Core matrisome	ECM Glycoproteins	N0.HOG0001379	OG0000318			Q8NFW1.2	Collagen alpha-1(XXII) chain
NV2t001047001.1	https://simrbase.stowers.org/feature/Nematostella/vectensis/mRNA/NV2t001047001.1	NV2.1047	Collagen alpha-1(XII) chain	vWFA domain-containing protein-6	NvvWFA-6	Core matrisome	ECM Glycoproteins	N0.HOG0001379	OG0000318			No hit	No hit
NV2t008413001.1	https://simrbase.stowers.org/feature/Nematostella/vectensis/mRNA/NV2t008413001.1	NV2.8413	Vitrin	vWFA domain-containing protein-7	NvvWFA-7	Core matrisome	ECM Glycoproteins	N0.HOG0000328	OG0000004			Q21540.2	Cuticlin-6
NV2t008558001.1	https://simrbase.stowers.org/feature/Nematostella/vectensis/mRNA/NV2t008558001.1	NV2.8558	Vitrin	vWFA domain-containing protein-8	NvvWFA-8	Core matrisome	ECM Glycoproteins	N0.HOG0000320	OG0000004	Cnidaria specific	Cnidaria specific	Q80X19.2	Collagen alpha-1(XIV) chain	0.322671	no hit	0.323656	0.255011	0.80023	no hit	0.0997358	0.715307	0.493513	no hit	0.22392	0.420861
NV2t008618001.1	https://simrbase.stowers.org/feature/Nematostella/vectensis/mRNA/NV2t008618001.1	NV2.8618	Collagen alpha-1(XII) chain	vWFA domain-containing protein-9	NvvWFA-9	Core matrisome	ECM Glycoproteins	N0.HOG0000309	OG0000004	Cnidaria specific	Cnidaria specific	P13944.3	Collagen alpha-1(XII) chain	0.00140151	hit	-2.09227	0.000234903	0.140853	candidate	0.709548	0.064783	0.00027207	hit	-2.80182	3.03074e-05
NV2t014005001.1	https://simrbase.stowers.org/feature/Nematostella/vectensis/mRNA/NV2t014005001.1	NV2.14005	Papilin	vWFA domain-containing TSR protein	NvvWFA-TSR	Core matrisome	ECM Glycoproteins	N0.HOG0000204	OG0000002	Cnidaria specific	Cnidaria specific	Q96RW7.2	Hemicentin-1	0.000360977	hit	1.70702	1.76599e-05	0.000325421	hit	-2.05331	4.48607e-06	7.54877e-06	hit	3.76033	4.28768e-08
NV2t000855001.1	https://simrbase.stowers.org/feature/Nematostella/vectensis/mRNA/NV2t000855001.1	NV2.855	Coadhesin (Fragment)	vWFA, EGF-like and Discoidin domain-containing protein-1	NvvWFA-EGF-Disc-1	Core matrisome	ECM Glycoproteins	N0.HOG0000469	OG0000008			B3EWZ3.1	No description found
NV2t000857001.1	https://simrbase.stowers.org/feature/Nematostella/vectensis/mRNA/NV2t000857001.1	NV2.857	Coadhesin (Fragment)	vWFA, EGF-like and Discoidin domain-containing protein-2	NvvWFA-EGF-Disc-2	Core matrisome	ECM Glycoproteins	N0.HOG0001957	OG0000894	Cnidaria specific	Cnidaria specific	B3EWZ3.1	No description found
NV2t000861001.1	https://simrbase.stowers.org/feature/Nematostella/vectensis/mRNA/NV2t000861001.1	NV2.861	Coadhesin (Fragment)	vWFA, EGF-like and Discoidin domain-containing protein-3	NvvWFA-EGF-Disc-3	Core matrisome	ECM Glycoproteins	N0.HOG0001957	OG0000894	Cnidaria specific	Cnidaria specific	B3EWZ3.1	No description found
NV2t011346003.1	https://simrbase.stowers.org/feature/Nematostella/vectensis/mRNA/NV2t011346003.1	NV2.11346	Collagen alpha-6(VI) chain	WAP and vWFA domain-containing protein	NvvWFA-WAP	Core matrisome	ECM Glycoproteins	N0.HOG0000298	OG0000004	Cnidaria specific	Cnidaria specific	A6NMZ7.2	Collagen alpha-6(VI) chain	0.00126369	hit	-1.38218	0.00020029	0.018561	candidate	-0.862437	0.0038116	0.0686792	no hit	-0.519745	0.0412805
NV2t014905001.1	https://simrbase.stowers.org/feature/Nematostella/vectensis/mRNA/NV2t014905001.1	NV2.14905	Basement membrane-specific heparan sulfate proteoglycan core protein	Basement membrane-specific heparan sulfate proteoglycan core protein	NvHspg	Core matrisome	Proteoglycans	N0.HOG0000569	OG0000010			P98160.4	Basement membrane-specific heparan sulfate proteoglycan core protein	0.0285707	candidate	-0.708407	0.0142263	0.574507	no hit	-0.183893	0.440806	0.0803979	no hit	-0.524514	0.0495742
NV2t012169001.1	https://simrbase.stowers.org/feature/Nematostella/vectensis/mRNA/NV2t012169001.1	NV2.12169	Hyaluronan and proteoglycan link protein 1	Brevican core protein-like	NvBcan-like	Core matrisome	Proteoglycans	N0.HOG0001062	OG0000090			Q96GW7.2	Brevican core protein
NV2t011760001.1	https://simrbase.stowers.org/feature/Nematostella/vectensis/mRNA/NV2t011760001.1	NV2.11760	Versican core protein	Chondroitin Sulfate Proteoglycan-like	NvCspd-like	Core matrisome	Proteoglycans	N0.HOG0001062	OG0000090			P81282.2	Versican core protein
NV2t022624001.1	https://simrbase.stowers.org/feature/Nematostella/vectensis/mRNA/NV2t022624001.1	NV2.22624	hyaluronan and proteoglycan link protein	Lectican-like-1	NvLecc-like-1	Core matrisome	Proteoglycans	N0.HOG0001062	OG0000090			Q6UC88.1	Lymphatic vessel endothelial hyaluronic acid receptor 1
NV2t022626001.1	https://simrbase.stowers.org/feature/Nematostella/vectensis/mRNA/NV2t022626001.1	NV2.22626	Neurocan core protein	Lectican-like-2	NvLecc-like-2	Core matrisome	Proteoglycans	N0.HOG0001062	OG0000090			P81282.2	Versican core protein
NV2t014907001.1	https://simrbase.stowers.org/feature/Nematostella/vectensis/mRNA/NV2t014907001.1	NV2.14907	Basement membrane-specific heparan sulfate proteoglycan core protein	Perlecan	NvPlc	Core matrisome	Proteoglycans	N0.HOG0000595	OG0000010			No hit	No hit	0.000371617	hit	-1.98028	1.86577e-05	0.0182645	candidate	-0.887949	0.00371116	0.00350236	hit	-1.09234	0.00108979
NV2t014904001.1	https://simrbase.stowers.org/feature/Nematostella/vectensis/mRNA/NV2t014904001.1	NV2.14904	heparan sulfate proteoglycan	Perlecan-like heparan sulfate proteoglycan core protein	NvPlc-like	Core matrisome	Proteoglycans	N0.HOG0000593	OG0000010			P98160.4	Basement membrane-specific heparan sulfate proteoglycan core protein	0.00351067	hit	-1.45513	0.000935901	0.0260508	hit	-1.05387	0.00609853	0.260331	no hit	-0.401263	0.196645
NV2t022783001.1	https://simrbase.stowers.org/feature/Nematostella/vectensis/mRNA/NV2t022783001.1	NV2.22783	Hemicentin-1	Proteoglycan-like	NvPG-like	Core matrisome	Proteoglycans	N0.HOG0000583	OG0000010	Cnidaria specific	Cnidaria specific	Q96RW7.2	Hemicentin-1
NV2t025674001.1	https://simrbase.stowers.org/feature/Nematostella/vectensis/mRNA/NV2t025674001.1	NV2.25674	C-type lectin domain containing 5A	Versican, partial	NvVers	Core matrisome	Proteoglycans	N0.HOG0000255	OG0000003			Q90953.1	Versican core protein
NV2t024729010.1	https://simrbase.stowers.org/feature/Nematostella/vectensis/mRNA/NV2t024729010.1	NV2.24729	Disintegrin and metalloproteinase domain-containing protein 10	ADAM metalloprotease-1	NvADAM-1	Matrisome associated	ECM regulators	N0.HOG0000832	OG0000030	Cnidaria specific	Cnidaria specific	O14672.1	Disintegrin and metalloproteinase domain-containing protein 10
NV2t006771001.1	https://simrbase.stowers.org/feature/Nematostella/vectensis/mRNA/NV2t006771001.1	NV2.6771	ADAM metallopeptidase domain 17	ADAM metalloprotease-2	NvADAM-2	Matrisome associated	ECM regulators	N0.HOG0000827	OG0000030			Q9VAC5.2	ADAM 17-like protease	0.00206149	candidate	-0.926101	0.000436327	0.00658935	candidate	-0.841059	0.000811956	0.67157	no hit	-0.0850415	0.611564
NV2t013893002.1	https://simrbase.stowers.org/feature/Nematostella/vectensis/mRNA/NV2t013893002.1	NV2.13893	ADAM metallopeptidase domain 10	ADAM metalloprotease-3	NvADAM-3	Matrisome associated	ECM regulators	N0.HOG0000831	OG0000030	Cnidaria specific	Cnidaria specific	O14672.1	Disintegrin and metalloproteinase domain-containing protein 10	0.00436479	hit	1.38977	0.001263	0.0813095	candidate	-0.75108	0.0302569	0.000488427	hit	2.14085	7.15064e-05
NV2t018385002.1	https://simrbase.stowers.org/feature/Nematostella/vectensis/mRNA/NV2t018385002.1	NV2.18385	mRNA	ADAM metalloprotease-4	NvADAM-4	Matrisome associated	ECM regulators	N0.HOG0000790	OG0000023			Q9H013.3	Disintegrin and metalloproteinase domain-containing protein 19	0.00635898	hit	1.11696	0.00209721	0.299646	no hit	-0.364369	0.182537	0.00150275	hit	1.48133	0.000355503
NV2t020818001.1	https://simrbase.stowers.org/feature/Nematostella/vectensis/mRNA/NV2t020818001.1	NV2.20818	Tenascin-N	ADAM metalloprotease-like	NvADAM-like	Matrisome associated	ECM regulators					P24821.3	Tenascin
NV2t022459002.1	https://simrbase.stowers.org/feature/Nematostella/vectensis/mRNA/NV2t022459002.1	NV2.22459	A disintegrin and metalloproteinase with thrombospondin motifs 6	ADAMTS metalloprotease-1	NvADAMTS-1	Matrisome associated	ECM regulators	N0.HOG0000692	OG0000014			Q9UKP5.2	A disintegrin and metalloproteinase with thrombospondin motifs 6	0.00994755	candidate	0.809769	0.00378591	0.117367	no hit	-0.460714	0.0507919	0.00109084	hit	1.27048	0.000229463
NV2t021229001.1	https://simrbase.stowers.org/feature/Nematostella/vectensis/mRNA/NV2t021229001.1	NV2.21229	ADAM metallopeptidase with thrombospondin type 1 motif 4	ADAMTS metalloprotease-10	NvADAMTS-10	Matrisome associated	ECM regulators	N0.HOG0000692	OG0000014			Q9UKP5.2	A disintegrin and metalloproteinase with thrombospondin motifs 6
NV2t021230001.1	https://simrbase.stowers.org/feature/Nematostella/vectensis/mRNA/NV2t021230001.1	NV2.21230	A disintegrin and metalloproteinase with thrombospondin motifs 6	ADAMTS metalloprotease-11	NvADAMTS-11	Matrisome associated	ECM regulators	N0.HOG0000692	OG0000014			O15072.4	A disintegrin and metalloproteinase with thrombospondin motifs 3
NV2t021636001.1	https://simrbase.stowers.org/feature/Nematostella/vectensis/mRNA/NV2t021636001.1	NV2.21636	A disintegrin and metalloproteinase with thrombospondin motifs 16	ADAMTS metalloprotease-12	NvADAMTS-12	Matrisome associated	ECM regulators	N0.HOG0000692	OG0000014			Q8TE57.3	A disintegrin and metalloproteinase with thrombospondin motifs 16	0.0083878	hit	1.09786	0.0030453	0.00896142	hit	-1.27168	0.00127355	0.000203614	hit	2.36954	1.83593e-05
NV2t021638002.1	https://simrbase.stowers.org/feature/Nematostella/vectensis/mRNA/NV2t021638002.1	NV2.21638	A disintegrin and metalloproteinase with thrombospondin motifs 6	ADAMTS metalloprotease-13	NvADAMTS-13	Matrisome associated	ECM regulators	N0.HOG0000692	OG0000014			Q9UKP5.2	A disintegrin and metalloproteinase with thrombospondin motifs 6
NV2t022465001.1	https://simrbase.stowers.org/feature/Nematostella/vectensis/mRNA/NV2t022465001.1	NV2.22465	A disintegrin and metalloproteinase with thrombospondin motifs 6	ADAMTS metalloprotease-14	NvADAMTS-14	Matrisome associated	ECM regulators	N0.HOG0000692	OG0000014			Q9UKP5.2	A disintegrin and metalloproteinase with thrombospondin motifs 6	0.189125	no hit	-0.35685	0.136584	0.152261	no hit	-0.445685	0.0726682	0.741221	no hit	0.0888349	0.691076
NV2t025184001.1	https://simrbase.stowers.org/feature/Nematostella/vectensis/mRNA/NV2t025184001.1	NV2.25184	A disintegrin and metalloproteinase with thrombospondin motifs 16	ADAMTS metalloprotease-15	NvADAMTS-15	Matrisome associated	ECM regulators	N0.HOG0000690	OG0000014	Cnidaria specific	Cnidaria specific	Q69Z28.2	A disintegrin and metalloproteinase with thrombospondin motifs 16
NV2t017494001.1	https://simrbase.stowers.org/feature/Nematostella/vectensis/mRNA/NV2t017494001.1	NV2.17494	ADAM metallopeptidase with thrombospondin type 1 motif 6	ADAMTS metalloprotease-2	NvADAMTS-2	Matrisome associated	ECM regulators	N0.HOG0000691	OG0000014	Cnidaria specific	Cnidaria specific	Q9UKP5.2	A disintegrin and metalloproteinase with thrombospondin motifs 6
NV2t024253001.1	https://simrbase.stowers.org/feature/Nematostella/vectensis/mRNA/NV2t024253001.1	NV2.24253	FBtr0301083	ADAMTS metalloprotease-3	NvADAMTS-3	Matrisome associated	ECM regulators	N0.HOG0000683	OG0000014			P58397.2	A disintegrin and metalloproteinase with thrombospondin motifs 12
NV2t009914001.1	https://simrbase.stowers.org/feature/Nematostella/vectensis/mRNA/NV2t009914001.1	NV2.9914	A disintegrin and metalloproteinase with thrombospondin motifs 3	ADAMTS metalloprotease-4	NvADAMTS-4	Matrisome associated	ECM regulators	N0.HOG0000693	OG0000014	Cnidaria specific	Cnidaria specific	O15072.4	A disintegrin and metalloproteinase with thrombospondin motifs 3	0.437112	no hit	-0.173283	0.364303	0.703143	no hit	-0.100001	0.593979	0.744	no hit	-0.0732814	0.694808
NV2t001123005.1	https://simrbase.stowers.org/feature/Nematostella/vectensis/mRNA/NV2t001123005.1	NV2.1123	A disintegrin and metalloproteinase with thrombospondin motifs 6	ADAMTS metalloprotease-5	NvADAMTS-5	Matrisome associated	ECM regulators	N0.HOG0000692	OG0000014			Q9UKP5.2	A disintegrin and metalloproteinase with thrombospondin motifs 6	0.618936	no hit	-0.137932	0.55569	0.013272	candidate	-0.987234	0.00231462	0.0123247	candidate	0.849302	0.00539464
NV2t001120001.1	https://simrbase.stowers.org/feature/Nematostella/vectensis/mRNA/NV2t001120001.1	NV2.1120	A disintegrin and metalloproteinase with thrombospondin motifs	ADAMTS metalloprotease-6	NvADAMTS-6	Matrisome associated	ECM regulators	N0.HOG0000692	OG0000014			Q9UKP5.2	A disintegrin and metalloproteinase with thrombospondin motifs 6	0.00500187	candidate	-0.727592	0.00151071	0.123473	no hit	-0.347192	0.0542126	0.0649706	no hit	-0.380401	0.0387445
NV2t000088001.1	https://simrbase.stowers.org/feature/Nematostella/vectensis/mRNA/NV2t000088001.1	NV2.88	ADAM metallopeptidase with thrombospondin type 1 motif 9	ADAMTS metalloprotease-7	NvADAMTS-7	Matrisome associated	ECM regulators	N0.HOG0000688	OG0000014			Q9P2N4.4	A disintegrin and metalloproteinase with thrombospondin motifs 9	0.044342	candidate	-0.590944	0.0244453	0.640925	no hit	0.144871	0.516374	0.018582	candidate	-0.735815	0.00879181
NV2t001124001.1	https://simrbase.stowers.org/feature/Nematostella/vectensis/mRNA/NV2t001124001.1	NV2.1124	ADAM metallopeptidase with thrombospondin type 1 motif 6	ADAMTS metalloprotease-8	NvADAMTS-8	Matrisome associated	ECM regulators	N0.HOG0000692	OG0000014			Q811B3.2	A disintegrin and metalloproteinase with thrombospondin motifs 12
NV2t017536001.1	https://simrbase.stowers.org/feature/Nematostella/vectensis/mRNA/NV2t017536001.1	NV2.17536	Disintegrin and metalloproteinase domain-containing protein 9	ADAMTS metalloprotease-9	NvADAMTS-9	Matrisome associated	ECM regulators	N0.HOG0000998	OG0000067	Cnidaria specific	Cnidaria specific	Q13443.1	Disintegrin and metalloproteinase domain-containing protein 9	0.0114322	candidate	0.76963	0.00455528	8.56862e-05	hit	-3.62448	8.43534e-08	6.34775e-06	hit	4.39411	1.87397e-08
NV2t018541001.1	https://simrbase.stowers.org/feature/Nematostella/vectensis/mRNA/NV2t018541001.1	NV2.18541	Coadhesin (Fragment)	ADAMTS-13-related	NvADAMTS13-related	Matrisome associated	ECM regulators	N0.HOG0000208	OG0000002			B3EWZ3.1	No description found
NV2t023275001.1	https://simrbase.stowers.org/feature/Nematostella/vectensis/mRNA/NV2t023275001.1	NV2.23275	ADAM metallopeptidase with thrombospondin type 1 motif 17	ADAMTS-like metalloprotease-17	NvADAMTS-17	Matrisome associated	ECM regulators	N0.HOG0000684	OG0000014	Cnidaria specific	Cnidaria specific	Q8TE59.2	A disintegrin and metalloproteinase with thrombospondin motifs 19
NV2t020821001.1	https://simrbase.stowers.org/feature/Nematostella/vectensis/mRNA/NV2t020821001.1	NV2.20821	thrombospondin	ADAMTS-like metalloprotease-18	NvADAMTS-18	Matrisome associated	ECM regulators	N0.HOG0000686	OG0000014			Q868Z9.2	Papilin	0.00062238	hit	-1.78091	5.88191e-05	0.0322513	candidate	-0.805913	0.00828499	0.00760036	candidate	-0.974995	0.00295065
NV2t000087001.1	https://simrbase.stowers.org/feature/Nematostella/vectensis/mRNA/NV2t000087001.1	NV2.87	Derived by automated computational analysis using gene prediction method Gnomon	ADAMTS-like metalloprotease-19	NvADAMTS-19	Matrisome associated	ECM regulators	N0.HOG0000688	OG0000014			Q9P2N4.4	A disintegrin and metalloproteinase with thrombospondin motifs 9	0.963907	no hit	-0.0129149	0.954608	0.151362	no hit	-0.455819	0.0720897	0.119113	no hit	0.442904	0.0789554
NV2t022999001.1	https://simrbase.stowers.org/feature/Nematostella/vectensis/mRNA/NV2t022999001.1	NV2.22999	lonely heart	ADAMTS-like metalloprotease-20	NvADAMTS-20	Matrisome associated	ECM regulators	N0.HOG0000676	OG0000014			Q80T21.1	ADAMTS-like protein 4	0.000410359	hit	-1.61177	2.47234e-05	0.164602	no hit	-0.371242	0.0802755	0.000845314	hit	-1.24052	0.000157883
NV2t024070001.1	https://simrbase.stowers.org/feature/Nematostella/vectensis/mRNA/NV2t024070001.1	NV2.24070	Papilin	ADAMTS-like metalloprotease-21	NvADAMTS-21	Matrisome associated	ECM regulators	N0.HOG0000692	OG0000014			O95428.4	Papilin
NV2t004033001.1	https://simrbase.stowers.org/feature/Nematostella/vectensis/mRNA/NV2t004033001.1	NV2.4033	N-acetylglucosamine-1-phosphodiester alpha-N- acetylglucosaminidase	Alpha-N-acetylglucosaminidase	NvNaglu	Matrisome associated	ECM regulators	N0.HOG0001331	OG0000276			P68827.2	N-acetylglucosamine-1-phosphodiester alpha-N-acetylglucosaminidase	0.0027574	candidate	-0.898227	0.000659082	0.00327302	hit	-1.03409	0.000261116	0.511439	no hit	0.13586	0.437758
NV2t016729001.1	https://simrbase.stowers.org/feature/Nematostella/vectensis/mRNA/NV2t016729001.1	NV2.16729	FBtr0074611	Astacin metalloprotease-1	NvAstacin-1	Matrisome associated	ECM regulators	N0.HOG0000357	OG0000005			P42674.1	Blastula protease 10	0.00014814	hit	3.14315	1.03794e-06	0.587858	no hit	0.185164	0.456258	5.59182e-05	hit	2.95799	1.64883e-06
NV2t023064001.1	https://simrbase.stowers.org/feature/Nematostella/vectensis/mRNA/NV2t023064001.1	NV2.23064	FBtr0080785	Astacin Metalloprotease-10	NvAstacin-10	Matrisome associated	ECM regulators	N0.HOG0000357	OG0000005			Q19269.2	Zinc metalloproteinase nas-14
NV2t004041001.1	https://simrbase.stowers.org/feature/Nematostella/vectensis/mRNA/NV2t004041001.1	NV2.4041	- metalloendopeptidase activity Evidence IEA	Astacin Metalloprotease-11	NvAstacin-11	Matrisome associated	ECM regulators	N0.HOG0000393	OG0000005	Cnidaria specific	Cnidaria specific	P55115.2	Zinc metalloproteinase nas-15	0.00112569	hit	-1.84669	0.000168629	0.685756	no hit	-0.164078	0.572071	0.00139401	hit	-1.68261	0.000316334
NV2t021687001.1	https://simrbase.stowers.org/feature/Nematostella/vectensis/mRNA/NV2t021687001.1	NV2.21687	Blastula protease 10	Astacin Metalloprotease-12	NvAstacin-12	Matrisome associated	ECM regulators	N0.HOG0000355	OG0000005			P42674.1	Blastula protease 10	0.0221832	candidate	0.728193	0.0104474	0.00745395	hit	-1.10992	0.000973378	0.000278998	hit	1.83812	3.15733e-05
NV2t018310001.1	https://simrbase.stowers.org/feature/Nematostella/vectensis/mRNA/NV2t018310001.1	NV2.18310	Metalloendopeptidase	Astacin Metalloprotease-13	NvAstacin-13	Matrisome associated	ECM regulators	N0.HOG0001660	OG0000597	Cnidaria specific	Cnidaria specific	K7Z9Q9.1	Nematocyst expressed protein 6
NV2t018077001.1	https://simrbase.stowers.org/feature/Nematostella/vectensis/mRNA/NV2t018077001.1	NV2.18077	Metalloendopeptidase	Astacin Metalloprotease-14	NvAstacin-14	Matrisome associated	ECM regulators	N0.HOG0000356	OG0000005			K7Z9Q9.1	Nematocyst expressed protein 6
NV2t003279001.1	https://simrbase.stowers.org/feature/Nematostella/vectensis/mRNA/NV2t003279001.1	NV2.3279	Metalloendopeptidase	Astacin Metalloprotease-15	NvAstacin-15	Matrisome associated	ECM regulators	N0.HOG0000364	OG0000005	Cnidaria specific	Cnidaria specific	O43897.1	Tolloid-like protein 1
NV2t003953001.1	https://simrbase.stowers.org/feature/Nematostella/vectensis/mRNA/NV2t003953001.1	NV2.3953	Metalloendopeptidase	Astacin Metalloprotease-16	NvAstacin-16	Matrisome associated	ECM regulators	N0.HOG0000390	OG0000005	Cnidaria specific	Cnidaria specific	Q9U3S9.2	Zinc metalloproteinase nas-6
NV2t005152001.1	https://simrbase.stowers.org/feature/Nematostella/vectensis/mRNA/NV2t005152001.1	NV2.5152	Chymotrypsinogen B2	Astacin Metalloprotease-17	NvAstacin-17	Matrisome associated	ECM regulators	N0.HOG0000360	OG0000005	Cnidaria specific	Cnidaria specific	Q6GPI1.2	Chymotrypsinogen B2	0.000559314	hit	-1.45732	4.58302e-05	0.0429722	candidate	-0.585184	0.0125896	0.00430285	candidate	-0.872137	0.00141678
NV2t008552001.1	https://simrbase.stowers.org/feature/Nematostella/vectensis/mRNA/NV2t008552001.1	NV2.8552	Zinc metalloproteinase nas-13	Astacin Metalloprotease-18	NvAstacin-18	Matrisome associated	ECM regulators	N0.HOG0000356	OG0000005			Q20191.5	Zinc metalloproteinase nas-13
NV2t010155001.1	https://simrbase.stowers.org/feature/Nematostella/vectensis/mRNA/NV2t010155001.1	NV2.10155	Metalloendopeptidase	Astacin Metalloprotease-19	NvAstacin-19	Matrisome associated	ECM regulators	N0.HOG0000364	OG0000005	Cnidaria specific	Cnidaria specific	Q1LW01.1	Hatching enzyme 1.2
NV2t024546001.1	https://simrbase.stowers.org/feature/Nematostella/vectensis/mRNA/NV2t024546001.1	NV2.24546	Deleted in malignant brain tumors 1 protein	Astacin metalloprotease-2	NvAstacin-2	Matrisome associated	ECM regulators	N0.HOG0000727	OG0000018			Q95218.2	Scavenger receptor cysteine-rich domain-containing protein DMBT1
NV2t011168001.1	https://simrbase.stowers.org/feature/Nematostella/vectensis/mRNA/NV2t011168001.1	NV2.11168	Blastula protease 10	Astacin metalloprotease-20	NvAstacin-20	Matrisome associated	ECM regulators	N0.HOG0000359	OG0000005	Cnidaria specific	Cnidaria specific	Q9U3S9.2	Zinc metalloproteinase nas-6
NV2t011169001.1	https://simrbase.stowers.org/feature/Nematostella/vectensis/mRNA/NV2t011169001.1	NV2.11169	Blastula protease 10	Astacin metalloprotease-21	NvAstacin-21	Matrisome associated	ECM regulators	N0.HOG0000359	OG0000005	Cnidaria specific	Cnidaria specific	P42674.1	Blastula protease 10	0.21218	no hit	-0.318425	0.156326	0.032219	candidate	-0.710096	0.00826568	0.133921	no hit	0.391671	0.0905546
NV2t011270001.1	https://simrbase.stowers.org/feature/Nematostella/vectensis/mRNA/NV2t011270001.1	NV2.11270	FBtr0083042	Astacin metalloprotease-22	NvAstacin-22	Matrisome associated	ECM regulators	N0.HOG0002211	OG0001148	Cnidaria specific	Cnidaria specific	Q16820.3	Meprin A subunit beta
NV2t013964001.1	https://simrbase.stowers.org/feature/Nematostella/vectensis/mRNA/NV2t013964001.1	NV2.13964	transmembrane serine protease 15	Astacin metalloprotease-23	NvAstacin-23	Matrisome associated	ECM regulators	N0.HOG0000973	OG0000058			B3EWZ5.1	MAM and LDL-receptor class A domain-containing protein 1	0.000101632	hit	2.73167	2.11e-07	0.00790691	candidate	-0.837341	0.00105706	6.36237e-06	hit	3.56901	2.6296e-08
NV2t014830002.1	https://simrbase.stowers.org/feature/Nematostella/vectensis/mRNA/NV2t014830002.1	NV2.14830	Zinc metalloproteinase nas-6	Astacin metalloprotease-24	NvAstacin-24	Matrisome associated	ECM regulators	N0.HOG0000533	OG0000009			P42674.1	Blastula protease 10	0.00347556	hit	-1.04767	0.000921068	0.0210692	candidate	-0.798796	0.00455897	0.328295	no hit	-0.248875	0.258449
NV2t015018001.1	https://simrbase.stowers.org/feature/Nematostella/vectensis/mRNA/NV2t015018001.1	NV2.15018	meprin A subunit	Astacin metalloprotease-25	NvAstacin-25	Matrisome associated	ECM regulators	N0.HOG0000385	OG0000005			B8V7S0.1	CUB and peptidase domain-containing protein 1	0.0368578	candidate	-0.713478	0.0195211	0.608662	no hit	-0.181846	0.478637	0.0967456	no hit	-0.531633	0.0617108
NV2t017332002.1	https://simrbase.stowers.org/feature/Nematostella/vectensis/mRNA/NV2t017332002.1	NV2.17332	Zinc metalloproteinase nas-13	Astacin metalloprotease-26	NvAstacin-26	Matrisome associated	ECM regulators	N0.HOG0000359	OG0000005	Cnidaria specific	Cnidaria specific	Q20191.5	Zinc metalloproteinase nas-13	0.00690369	hit	-1.12105	0.00235832	0.0127607	hit	-1.13677	0.00217326	0.960577	no hit	0.0157213	0.952447
NV2t017973001.1	https://simrbase.stowers.org/feature/Nematostella/vectensis/mRNA/NV2t017973001.1	NV2.17973	Hatching enzyme 1.2	Astacin metalloprotease-27	NvAstacin-27	Matrisome associated	ECM regulators	N0.HOG0000397	OG0000005	Cnidaria specific	Cnidaria specific	Q1LW01.1	Hatching enzyme 1.2
NV2t018104001.1	https://simrbase.stowers.org/feature/Nematostella/vectensis/mRNA/NV2t018104001.1	NV2.18104	Metalloendopeptidase	Astacin metalloprotease-28	NvAstacin-28	Matrisome associated	ECM regulators	N0.HOG0000394	OG0000005	Cnidaria specific	Cnidaria specific	Q18439.3	Zinc metalloproteinase nas-8	0.00170046	hit	-1.78245	0.000321746	0.00360845	hit	-1.79324	0.000309052	0.976013	no hit	0.0107932	0.971787
NV2t021385001.1	https://simrbase.stowers.org/feature/Nematostella/vectensis/mRNA/NV2t021385001.1	NV2.21385	Derived by automated computational analysis using gene prediction method Gnomon	Astacin metalloprotease-29	NvAstacin-29	Matrisome associated	ECM regulators	N0.HOG0000364	OG0000005	Cnidaria specific	Cnidaria specific	P42674.1	Blastula protease 10
NV2t010250001.1	https://simrbase.stowers.org/feature/Nematostella/vectensis/mRNA/NV2t010250001.1	NV2.10250	Metalloendopeptidase	Astacin metalloprotease-3	NvAstacin-3	Matrisome associated	ECM regulators	N0.HOG0000393	OG0000005	Cnidaria specific	Cnidaria specific	P55115.2	Zinc metalloproteinase nas-15	0.000683748	hit	-1.67327	6.90606e-05	0.509164	no hit	0.211083	0.369617	0.000269201	hit	-1.88435	2.95109e-05
NV2t013745005.1	https://simrbase.stowers.org/feature/Nematostella/vectensis/mRNA/NV2t013745005.1	NV2.13745	Zinc metalloproteinase nas-13	Astacin metalloprotease-4	NvAstacin-4	Matrisome associated	ECM regulators	N0.HOG0000357	OG0000005			P55115.2	Zinc metalloproteinase nas-15
NV2t002486001.1	https://simrbase.stowers.org/feature/Nematostella/vectensis/mRNA/NV2t002486001.1	NV2.2486	Zinc metalloproteinase nas-4	Astacin metalloprotease-5	NvAstacin-5	Matrisome associated	ECM regulators	N0.HOG0000391	OG0000005	Cnidaria specific	Cnidaria specific	P55112.4	Zinc metalloproteinase nas-4
NV2t015011001.1	https://simrbase.stowers.org/feature/Nematostella/vectensis/mRNA/NV2t015011001.1	NV2.15011	high choriolytic enzyme	Astacin metalloprotease-6	NvAstacin-6	Matrisome associated	ECM regulators	N0.HOG0000357	OG0000005			P31579.1	Low choriolytic enzyme
NV2t019110001.1	https://simrbase.stowers.org/feature/Nematostella/vectensis/mRNA/NV2t019110001.1	NV2.19110	Zinc metalloproteinase nas-13	Astacin metalloprotease-7	NvAstacin-7	Matrisome associated	ECM regulators	N0.HOG0000397	OG0000005	Cnidaria specific	Cnidaria specific	Q20191.5	Zinc metalloproteinase nas-13
NV2t005141005.1	https://simrbase.stowers.org/feature/Nematostella/vectensis/mRNA/NV2t005141005.1	NV2.5141	Zinc metalloproteinase nas-6	Astacin metalloprotease-8	NvAstacin-8	Matrisome associated	ECM regulators	N0.HOG0000360	OG0000005	Cnidaria specific	Cnidaria specific	P55115.2	Zinc metalloproteinase nas-15	0.712774	no hit	-0.121425	0.660911	0.626712	no hit	-0.188521	0.499618	0.841948	no hit	0.0670959	0.807647
NV2t002433001.1	https://simrbase.stowers.org/feature/Nematostella/vectensis/mRNA/NV2t002433001.1	NV2.2433	Metalloendopeptidase	Astacin metalloprotease-9	NvAstacin-9	Matrisome associated	ECM regulators	N0.HOG0002621	OG0001558	Cnidaria specific	Cnidaria specific	P98068.1	Protein SpAN	0.137867	no hit	0.392673	0.0940014	0.0022253	hit	1.41136	0.000137137	0.00369939	hit	-1.01868	0.00116712
NV2t014828001.1	https://simrbase.stowers.org/feature/Nematostella/vectensis/mRNA/NV2t014828001.1	NV2.14828	Zinc metalloproteinase	Astacin-like metalloprotease-1	NvAstacin-like-1	Matrisome associated	ECM regulators	N0.HOG0003075	OG0002012	Cnidaria specific	Cnidaria specific	C9D7R3.1	Astacin-like metalloprotease toxin 3	0.00167445	hit	-1.52345	0.000314846	0.168305	no hit	-0.499378	0.0830093	0.00904987	hit	-1.02407	0.00365842
NV2t008027002.1	https://simrbase.stowers.org/feature/Nematostella/vectensis/mRNA/NV2t008027002.1	NV2.8027	matrix metallopeptidase 7	Astacin-like metalloprotease-2	NvAstacin-like-2	Matrisome associated	ECM regulators	N0.HOG0000716	OG0000016			Q6Y4Q5.1	Stromelysin-1	0.00159698	hit	-1.59413	0.000292417	0.298758	no hit	-0.381834	0.181461	0.00487307	hit	-1.21229	0.00167359
NV2t025693001.1	https://simrbase.stowers.org/feature/Nematostella/vectensis/mRNA/NV2t025693001.1	NV2.25693	Tolloid-like protein 1	BMP/Tolloid-like-1	NvBMP/Toll-1	Matrisome associated	ECM regulators	N0.HOG0001594	OG0000531	Cnidaria specific	Cnidaria specific	Q8JI28.1	Tolloid-like protein 1
NV2t025692001.1	https://simrbase.stowers.org/feature/Nematostella/vectensis/mRNA/NV2t025692001.1	NV2.25692	Cubilin homolog	BMP/Tolloid-like-2	NvBMP/Toll-2	Matrisome associated	ECM regulators	N0.HOG0001594	OG0000531	Cnidaria specific	Cnidaria specific	Q5VXM1.2	CUB domain-containing protein 2
NV2t019953001.1	https://simrbase.stowers.org/feature/Nematostella/vectensis/mRNA/NV2t019953001.1	NV2.19953	Coagulation factor VIII	Coagulation factor-like-1	NvCoag-like 1	Matrisome associated	ECM regulators	N0.HOG0000868	OG0000035	Cnidaria specific	Cnidaria specific	O35375.2	Neuropilin-2
NV2t001113001.1	https://simrbase.stowers.org/feature/Nematostella/vectensis/mRNA/NV2t001113001.1	NV2.1113	Coagulation factor VIII	Coagulation factor-like-2	NvCoag-like 2	Matrisome associated	ECM regulators	N0.HOG0000868	OG0000035	Cnidaria specific	Cnidaria specific	P70490.1	Lactadherin	0.795817	no hit	0.0717783	0.754921	0.0256627	candidate	-0.825584	0.00596543	0.00929599	candidate	0.897362	0.00378568
NV2t019396001.1	https://simrbase.stowers.org/feature/Nematostella/vectensis/mRNA/NV2t019396001.1	NV2.19396	Venom prothrombin activator pseutarin-C non-catalytic subunit	Coagulation factor-like-3	NvCoag-like 3	Matrisome associated	ECM regulators	N0.HOG0002635	OG0001572	Cnidaria specific	Cnidaria specific	P28824.1	Neuropilin-1
NV2t001635001.1	https://simrbase.stowers.org/feature/Nematostella/vectensis/mRNA/NV2t001635001.1	NV2.1635	Coagulation factor VIII	Coagulation factor-like-4	NvCoag-like 4	Matrisome associated	ECM regulators	N0.HOG0000870	OG0000035	Cnidaria specific	Cnidaria specific	P00451.1	Coagulation factor VIII
NV2t003648001.1	https://simrbase.stowers.org/feature/Nematostella/vectensis/mRNA/NV2t003648001.1	NV2.3648	EGF-like repeat and discoidin I-like domain-containing protein 3	Coagulation factor-like-5	NvCoag-like 5	Matrisome associated	ECM regulators	N0.HOG0000875	OG0000035			Q593B6.1	Coagulation factor V	0.944272	no hit	-0.0274446	0.932187	0.000887534	hit	2.64923	2.98113e-05	0.000257466	hit	-2.67667	2.76671e-05
NV2t019400001.1	https://simrbase.stowers.org/feature/Nematostella/vectensis/mRNA/NV2t019400001.1	NV2.19400	EGF-like repeat and discoidin I-like domain-containing protein 3	Coagulation factor-like-6	NvCoag-like 6	Matrisome associated	ECM regulators	N0.HOG0002635	OG0001572	Cnidaria specific	Cnidaria specific	O43854.1	EGF-like repeat and discoidin I-like domain-containing protein 3
NV2t014492001.1	https://simrbase.stowers.org/feature/Nematostella/vectensis/mRNA/NV2t014492001.1	NV2.14492	Lactadherin	Coagulation factor-related-1	NvCoag-related 1	Matrisome associated	ECM regulators	N0.HOG0000948	OG0000052	Cnidaria specific	Cnidaria specific	P70490.1	Lactadherin
NV2t000581002.1	https://simrbase.stowers.org/feature/Nematostella/vectensis/mRNA/NV2t000581002.1	NV2.581	Receptor-type tyrosine-protein phosphatase S	Coagulation factor-related-2	NvCoag-related 2	Matrisome associated	ECM regulators	N0.HOG0000868	OG0000035	Cnidaria specific	Cnidaria specific	P70490.1	Lactadherin	0.000623957	hit	-1.8433	6.03482e-05	0.00417623	hit	-1.4047	0.000389748	0.152482	no hit	-0.438601	0.105156
NV2t000593001.1	https://simrbase.stowers.org/feature/Nematostella/vectensis/mRNA/NV2t000593001.1	NV2.593	Lactadherin	Coagulation factor-related-3	NvCoag-related 3	Matrisome associated	ECM regulators	N0.HOG0000868	OG0000035	Cnidaria specific	Cnidaria specific	P70490.1	Lactadherin
NV2t001284001.1	https://simrbase.stowers.org/feature/Nematostella/vectensis/mRNA/NV2t001284001.1	NV2.1284	Hemocytin	Coagulation factor-related-4	NvCoag-related 4	Matrisome associated	ECM regulators	N0.HOG0001209	OG0000170			Q95114.2	Lactadherin
NV2t008996001.1	https://simrbase.stowers.org/feature/Nematostella/vectensis/mRNA/NV2t008996001.1	NV2.8996	cystatin A	Cystatin-like-1	NvCystat-1	Matrisome associated	ECM regulators	N0.HOG0001067	OG0000093			B2Z449.1	Cystatin-B	0.383164	no hit	-0.193189	0.312306	0.528106	no hit	0.162884	0.38978	0.123349	no hit	-0.356073	0.0822
NV2t012344001.1	https://simrbase.stowers.org/feature/Nematostella/vectensis/mRNA/NV2t012344001.1	NV2.12344	Unconventional myosin-X	Cystatin-like-2	NvCystat-2	Matrisome associated	ECM regulators	N0.HOG0001418	OG0000357	Cnidaria specific	Cnidaria specific	No hit	No hit	0.00211182	candidate	-0.96454	0.000456541	0.757966	no hit	-0.07638	0.662903	0.00271203	candidate	-0.88816	0.000777154
NV2t017628001.1	https://simrbase.stowers.org/feature/Nematostella/vectensis/mRNA/NV2t017628001.1	NV2.17628	cystatin E/M	Cystatin-like-3	NvCystat-3	Matrisome associated	ECM regulators	N0.HOG0001032	OG0000078			J3SE80.1	Cystatin-2
NV2t001170001.1	https://simrbase.stowers.org/feature/Nematostella/vectensis/mRNA/NV2t001170001.1	NV2.1170	cysteine rich with EGF like domains 2	Cysteine-rich with EGF-like domain protein 2	NvCRELD2	Matrisome associated	ECM regulators	N0.HOG0001043	OG0000081	Cnidaria specific	Cnidaria specific	Q7SXF6.2	Cysteine-rich with EGF-like domain protein 2	0.361053	no hit	-0.242712	0.291458	0.877727	no hit	0.0511156	0.817933	0.273678	no hit	-0.293828	0.208773
NV2t017717001.1	https://simrbase.stowers.org/feature/Nematostella/vectensis/mRNA/NV2t017717001.1	NV2.17717	heparanase-like protein	Heparanase-1	NvHspe-1	Matrisome associated	ECM regulators	N0.HOG0001101	OG0000112			Q9Y251.2	Heparanase
NV2t018651001.1	https://simrbase.stowers.org/feature/Nematostella/vectensis/mRNA/NV2t018651001.1	NV2.18651	heparanase	Heparanase-2	NvHspe-2	Matrisome associated	ECM regulators	N0.HOG0001101	OG0000112			Q90YK5.1	Heparanase	0.569807	no hit	0.215518	0.502269	0.0625666	candidate	-0.879679	0.0210179	0.0160325	hit	1.0952	0.00735764
NV2t014428001.1	https://simrbase.stowers.org/feature/Nematostella/vectensis/mRNA/NV2t014428001.1	NV2.14428	hyaluronidase	Hyaluronidase-1	NvHyal-1	Matrisome associated	ECM regulators	N0.HOG0001049	OG0000083	Cnidaria specific	Cnidaria specific	Q76HN1.1	Hyaluronidase-1
NV2t014444001.1	https://simrbase.stowers.org/feature/Nematostella/vectensis/mRNA/NV2t014444001.1	NV2.14444	hyaluronidase 1	Hyaluronidase-2	NvHyal-2	Matrisome associated	ECM regulators	N0.HOG0001050	OG0000083	Cnidaria specific	Cnidaria specific	Q12794.2	Hyaluronidase-1
NV2t006476001.1	https://simrbase.stowers.org/feature/Nematostella/vectensis/mRNA/NV2t006476001.1	NV2.6476	cysteine-rich motor neuron 1	Insulin-like growth factor-binding protein and Kazal domain-containing protein	NvIGFKz	Matrisome associated	ECM regulators	N0.HOG0000899	OG0000040	Cnidaria specific	Cnidaria specific	Q7T3Q2.1	Cysteine-rich motor neuron 1 protein	0.00156571	hit	-1.95595	0.000282068	0.50255	no hit	0.307288	0.362639	0.000632272	hit	-2.26323	0.000103906
NV2t022463001.1	https://simrbase.stowers.org/feature/Nematostella/vectensis/mRNA/NV2t022463001.1	NV2.22463	von Willebrand factor A domain containing 5A	Inter-alpha-trypsin inhibitor	NvItih	Matrisome associated	ECM regulators	N0.HOG0000905	OG0000041			O00534.2	von Willebrand factor A domain-containing protein 5A	0.00211616	candidate	-0.901458	0.000459564	0.437328	no hit	-0.174584	0.30111	0.00509839	candidate	-0.726874	0.00177457
NV2t015230001.1	https://simrbase.stowers.org/feature/Nematostella/vectensis/mRNA/NV2t015230001.1	NV2.15230	von Willebrand factor A domain containing 5B2	Inter-alpha-trypsin inhibitor heavy chain H1-like	NvItih_hC	Matrisome associated	ECM regulators	N0.HOG0000906	OG0000041			A9Z1V5.1	von Willebrand factor A domain-containing protein 5B1	0.274082	no hit	0.262157	0.21116	0.679799	no hit	-0.115862	0.564559	0.127971	no hit	0.378019	0.0857592
NV2t014070001.1	https://simrbase.stowers.org/feature/Nematostella/vectensis/mRNA/NV2t014070001.1	NV2.14070	matrilin 4	Kazal-type serine protease inhibitor	NvKSI	Matrisome associated	ECM regulators	N0.HOG0001235	OG0000188			O00468.6	Agrin	0.000877401	hit	-2.33736	0.000104687	0.363952	no hit	-0.421592	0.236114	0.00166072	hit	-1.91577	0.000403977
NV2t010172001.1	https://simrbase.stowers.org/feature/Nematostella/vectensis/mRNA/NV2t010172001.1	NV2.10172	WAP follistatin/kazal immunoglobulin kunitz and netrin domain containing 1	Kunitz-type serine protease inhibitor-1	NvKusi-1	Matrisome associated	ECM regulators	N0.HOG0000894	OG0000040	Cnidaria specific	Cnidaria specific	P86959.1	BPTI/Kunitz domain-containing protein 1
NV2t000320001.1	https://simrbase.stowers.org/feature/Nematostella/vectensis/mRNA/NV2t000320001.1	NV2.320	Cubilin	Kunitz-type serine protease inhibitor-2	NvKusi-2	Matrisome associated	ECM regulators	N0.HOG0000898	OG0000040	Cnidaria specific	Cnidaria specific	O95925.1	Eppin	0.000374651	hit	-2.15635	1.91788e-05	0.817631	no hit	0.0836991	0.735691	0.000177118	hit	-2.24005	1.45065e-05
NV2t003373003.1	https://simrbase.stowers.org/feature/Nematostella/vectensis/mRNA/NV2t003373003.1	NV2.3373	Kunitz-type kappaPI-theraphotoxin-Hs1e	Kunitz-type serine protease inhibitor-3	NvKusi-3	Matrisome associated	ECM regulators	N0.HOG0000806	OG0000024			P81439.2	Equistatin
NV2t021204001.1	https://simrbase.stowers.org/feature/Nematostella/vectensis/mRNA/NV2t021204001.1	NV2.21204	cysteine rich transmembrane BMP regulator 1	Kunitz-type serine protease inhibitor-4	NvKusi-4	Matrisome associated	ECM regulators	N0.HOG0000895	OG0000040	Cnidaria specific	Cnidaria specific	P86733.1	No description found	0.288368	no hit	-0.230189	0.224017	0.0732392	no hit	-0.476256	0.0260714	0.260297	no hit	0.246066	0.196567
NV2t020815001.1	https://simrbase.stowers.org/feature/Nematostella/vectensis/mRNA/NV2t020815001.1	NV2.20815	mRNA	L,D-transpeptidase-like	NvLDTFM	Matrisome associated	ECM regulators	N0.HOG0001511	OG0000448			No hit	No hit
NV2t019166001.1	https://simrbase.stowers.org/feature/Nematostella/vectensis/mRNA/NV2t019166001.1	NV2.19166	lysyl oxidase homolog	Lysyl oxidase subfamily 2-like	NvLox2-like	Matrisome associated	ECM regulators	N0.HOG0000726	OG0000018			Q5RFQ6.1	Lysyl oxidase homolog 2	0.499452	no hit	0.184661	0.428846	0.0130837	candidate	0.98005	0.00224888	0.0156734	candidate	-0.795389	0.00715406
NV2t019165003.1	https://simrbase.stowers.org/feature/Nematostella/vectensis/mRNA/NV2t019165003.1	NV2.19165	Lysyl oxidase homolog 2	Lysyl Oxidase-like	NvLox	Matrisome associated	ECM regulators	N0.HOG0000726	OG0000018			A1L1V4.1	Lysyl oxidase homolog 2B	0.00353185	hit	1.89112	0.00094572	0.177619	candidate	0.718007	0.0889667	0.0262729	hit	1.17311	0.013403
NV2t013120001.1	https://simrbase.stowers.org/feature/Nematostella/vectensis/mRNA/NV2t013120001.1	NV2.13120	Peptidase M28	M28 Family Metalloprotease	NvM28MMP	Matrisome associated	ECM regulators	N0.HOG0001447	OG0000384			F1RWC3.3	Cubilin	0.00431523	hit	1.23903	0.0012396	0.00518451	hit	-1.40656	0.000556321	0.000111836	hit	2.64558	6.49315e-06
NV2t003735001.1	https://simrbase.stowers.org/feature/Nematostella/vectensis/mRNA/NV2t003735001.1	NV2.3735	corin	MASP-like serine protease	NvMASP	Matrisome associated	ECM regulators	N0.HOG0000560	OG0000009	Cnidaria specific	Cnidaria specific	O00339.4	Matrilin-2	0.840778	no hit	0.0398742	0.808743	0.43969	no hit	-0.175412	0.303169	0.279184	no hit	0.215286	0.213852
NV2t008375002.1	https://simrbase.stowers.org/feature/Nematostella/vectensis/mRNA/NV2t008375002.1	NV2.8375	Matrix metalloproteinase-19	Matrix metalloprotease-1	NvMMP-1	Matrisome associated	ECM regulators	N0.HOG0000716	OG0000016			Q9JHI0.1	Matrix metalloproteinase-19	0.0123799	hit	-1.1766	0.005087	0.047013	candidate	-0.960297	0.0142363	0.571732	no hit	-0.216305	0.501605
NV2t019146001.1	https://simrbase.stowers.org/feature/Nematostella/vectensis/mRNA/NV2t019146001.1	NV2.19146	ZnMc domain-containing protein	Matrix metalloprotease-10	NvMMP-10	Matrisome associated	ECM regulators	N0.HOG0000707	OG0000016	Cnidaria specific	Cnidaria specific	Q8K3F2.1	Matrix metalloproteinase-21
NV2t019316003.1	https://simrbase.stowers.org/feature/Nematostella/vectensis/mRNA/NV2t019316003.1	NV2.19316	Matrilysin	Matrix metalloprotease-11	NvMMP-11	Matrisome associated	ECM regulators	N0.HOG0000716	OG0000016			P09237.1	Matrilysin
NV2t020475001.1	https://simrbase.stowers.org/feature/Nematostella/vectensis/mRNA/NV2t020475001.1	NV2.20475	matrix metallopeptidase 25	Matrix metalloprotease-12	NvMMP-12	Matrisome associated	ECM regulators	N0.HOG0000708	OG0000016	Cnidaria specific	Cnidaria specific	Q9R0S3.3	Matrix metalloproteinase-17	0.000303486	hit	-1.94578	1.17116e-05	0.0796755	no hit	-0.53591	0.0292724	0.000694241	hit	-1.40987	0.000118462
NV2t020474001.1	https://simrbase.stowers.org/feature/Nematostella/vectensis/mRNA/NV2t020474001.1	NV2.20474	matrix metallopeptidase 25	Matrix Metalloprotease-2	NvMMP-2	Matrisome associated	ECM regulators	N0.HOG0000708	OG0000016	Cnidaria specific	Cnidaria specific	Q9ULZ9.4	Matrix metalloproteinase-17	0.000559314	hit	-1.39483	4.58339e-05	0.740895	no hit	-0.0846186	0.641117	0.000488427	hit	-1.31021	7.15193e-05
NV2t000807001.1	https://simrbase.stowers.org/feature/Nematostella/vectensis/mRNA/NV2t000807001.1	NV2.807	ZnMc domain-containing protein	Matrix Metalloprotease-3	NvMMP-3	Matrisome associated	ECM regulators	N0.HOG0000716	OG0000016			P91953.1	50 kDa hatching enzyme	0.264465	no hit	-0.237626	0.202026	0.000619333	hit	-1.58794	1.52625e-05	0.000378687	hit	1.35031	4.94134e-05
NV2t010833001.1	https://simrbase.stowers.org/feature/Nematostella/vectensis/mRNA/NV2t010833001.1	NV2.10833	matrix metallopeptidase 26	Matrix Metalloprotease-4	NvMMP-4	Matrisome associated	ECM regulators	N0.HOG0000716	OG0000016			P09237.1	Matrilysin
NV2t014297001.1	https://simrbase.stowers.org/feature/Nematostella/vectensis/mRNA/NV2t014297001.1	NV2.14297	matrix metallopeptidase 23B	Matrix Metalloprotease-5	NvMMP-5	Matrisome associated	ECM regulators	N0.HOG0000716	OG0000016			P09237.1	Matrilysin
NV2t001647001.1	https://simrbase.stowers.org/feature/Nematostella/vectensis/mRNA/NV2t001647001.1	NV2.1647	matrix metallopeptidase 7	Matrix Metalloprotease-6	NvMMP-6	Matrisome associated	ECM regulators	N0.HOG0000716	OG0000016			P22757.1	Hatching enzyme	0.0137756	hit	-1.09059	0.00580967	0.0362978	candidate	-0.986673	0.00974086	0.775913	no hit	-0.103914	0.731169
NV2t003582001.1	https://simrbase.stowers.org/feature/Nematostella/vectensis/mRNA/NV2t003582001.1	NV2.3582	ZnMc domain-containing protein	Matrix Metalloprotease-7	NvMMP-7	Matrisome associated	ECM regulators	N0.HOG0000716	OG0000016			P91953.1	50 kDa hatching enzyme	0.853554	no hit	-0.126207	0.82364	0.584764	no hit	0.432735	0.452556	0.411966	no hit	-0.558942	0.337697
NV2t014820001.1	https://simrbase.stowers.org/feature/Nematostella/vectensis/mRNA/NV2t014820001.1	NV2.14820	matrix metallopeptidase 15	Matrix Metalloprotease-8	NvMMP-8	Matrisome associated	ECM regulators	N0.HOG0000716	OG0000016			P91953.1	50 kDa hatching enzyme
NV2t016880001.1	https://simrbase.stowers.org/feature/Nematostella/vectensis/mRNA/NV2t016880001.1	NV2.16880	FBtr0273263	Matrix Metalloprotease-9	NvMMP-9	Matrisome associated	ECM regulators	N0.HOG0000713	OG0000016			Q10739.2	Matrix metalloproteinase-14
NV2t025961001.1	https://simrbase.stowers.org/feature/Nematostella/vectensis/mRNA/NV2t025961001.1	NV2.25961	Zinc metalloproteinase nas-15	Meprin-like Astacin metalloprotease-1	NvMep-1	Matrisome associated	ECM regulators	N0.HOG0000383	OG0000005	Cnidaria specific	Cnidaria specific	P55115.2	Zinc metalloproteinase nas-15
NV2t005698001.1	https://simrbase.stowers.org/feature/Nematostella/vectensis/mRNA/NV2t005698001.1	NV2.5698	Derived by automated computational analysis using gene prediction method Gnomon	Meprin-like Astacin metalloprotease-10	NvMep-10	Matrisome associated	ECM regulators	N0.HOG0000379	OG0000005	Cnidaria specific	Cnidaria specific	Q20191.5	Zinc metalloproteinase nas-13	0.342354	no hit	-0.264881	0.273667	0.00123888	hit	-1.75744	5.41505e-05	0.000885145	hit	1.49256	0.000169678
NV2t008948001.1	https://simrbase.stowers.org/feature/Nematostella/vectensis/mRNA/NV2t008948001.1	NV2.8948	Derived by automated computational analysis using gene prediction method Gnomon	Meprin-like Astacin metalloprotease-11	NvMep-11	Matrisome associated	ECM regulators	N0.HOG0000375	OG0000005	Cnidaria specific	Cnidaria specific	P55115.2	Zinc metalloproteinase nas-15
NV2t013368001.1	https://simrbase.stowers.org/feature/Nematostella/vectensis/mRNA/NV2t013368001.1	NV2.13368	Metalloendopeptidase	Meprin-like Astacin metalloprotease-12	NvMep-12	Matrisome associated	ECM regulators	N0.HOG0000385	OG0000005			Q16820.3	Meprin A subunit beta
NV2t014862004.1	https://simrbase.stowers.org/feature/Nematostella/vectensis/mRNA/NV2t014862004.1	NV2.14862	Metalloendopeptidase	Meprin-like Astacin metalloprotease-13	NvMep-13	Matrisome associated	ECM regulators	N0.HOG0000385	OG0000005			Q16820.3	Meprin A subunit beta	0.00217772	hit	1.61639	0.000476793	0.000228781	hit	-3.6398	1.39638e-06	9.97308e-06	hit	5.25619	8.20888e-08
NV2t015924001.1	https://simrbase.stowers.org/feature/Nematostella/vectensis/mRNA/NV2t015924001.1	NV2.15924	Zinc metalloproteinase nas-15	Meprin-like Astacin metalloprotease-14	NvMep-14	Matrisome associated	ECM regulators	N0.HOG0000375	OG0000005	Cnidaria specific	Cnidaria specific	P55115.2	Zinc metalloproteinase nas-15
NV2t015925002.1	https://simrbase.stowers.org/feature/Nematostella/vectensis/mRNA/NV2t015925002.1	NV2.15925	MAM and LDL-receptor class A domain-containing protein 2 (Fragment)	Meprin-like Astacin metalloprotease-15	NvMep-15	Matrisome associated	ECM regulators	N0.HOG0000375	OG0000005	Cnidaria specific	Cnidaria specific	B3EWZ6.1	MAM and LDL-receptor class A domain-containing protein 2
NV2t016035001.1	https://simrbase.stowers.org/feature/Nematostella/vectensis/mRNA/NV2t016035001.1	NV2.16035	Zinc metalloproteinase nas-4	Meprin-like Astacin metalloprotease-16	NvMep-16	Matrisome associated	ECM regulators	N0.HOG0000375	OG0000005	Cnidaria specific	Cnidaria specific	P55112.4	Zinc metalloproteinase nas-4	0.231868	no hit	0.499624	0.17357	0.00106169	hit	-2.70196	4.20075e-05	0.000163754	hit	3.20158	1.22146e-05
NV2t016036001.1	https://simrbase.stowers.org/feature/Nematostella/vectensis/mRNA/NV2t016036001.1	NV2.16036	Zinc metalloproteinase nas-13	Meprin-like Astacin metalloprotease-17	NvMep-17	Matrisome associated	ECM regulators	N0.HOG0000375	OG0000005	Cnidaria specific	Cnidaria specific	Q20191.5	Zinc metalloproteinase nas-13
NV2t023644001.1	https://simrbase.stowers.org/feature/Nematostella/vectensis/mRNA/NV2t023644001.1	NV2.23644	meprin A alpha PABA peptide hydrolase tandem duplicate 1	Meprin-like Astacin metalloprotease-18	NvMep-18	Matrisome associated	ECM regulators	N0.HOG0000973	OG0000058			B3EWZ6.1	MAM and LDL-receptor class A domain-containing protein 2
NV2t016572002.1	https://simrbase.stowers.org/feature/Nematostella/vectensis/mRNA/NV2t016572002.1	NV2.16572	A disintegrin and metalloproteinase with thrombospondin motifs	Meprin-like Astacin metalloprotease-2	NvMep-2	Matrisome associated	ECM regulators	N0.HOG0000375	OG0000005	Cnidaria specific	Cnidaria specific	P55115.2	Zinc metalloproteinase nas-15	0.0237203	candidate	0.977579	0.0113441	0.208567	no hit	0.534538	0.111203	0.237266	no hit	0.443041	0.176094
NV2t020641001.1	https://simrbase.stowers.org/feature/Nematostella/vectensis/mRNA/NV2t020641001.1	NV2.20641	Zinc metalloproteinase nas-15	Meprin-like Astacin metalloprotease-3	NvMep-3	Matrisome associated	ECM regulators	N0.HOG0000383	OG0000005	Cnidaria specific	Cnidaria specific	P55115.2	Zinc metalloproteinase nas-15
NV2t016574001.1	https://simrbase.stowers.org/feature/Nematostella/vectensis/mRNA/NV2t016574001.1	NV2.16574	Meprin A subunit beta	Meprin-like Astacin metalloprotease-4	NvMep-4	Matrisome associated	ECM regulators	N0.HOG0000375	OG0000005	Cnidaria specific	Cnidaria specific	Q16820.3	Meprin A subunit beta	0.000512583	hit	-3.22974	3.92587e-05	0.928392	no hit	-0.0567436	0.889567	0.000353935	hit	-3.173	4.45814e-05
NV2t017022001.1	https://simrbase.stowers.org/feature/Nematostella/vectensis/mRNA/NV2t017022001.1	NV2.17022	MAM and LDL-receptor class A domain-containing protein 1-like	Meprin-like Astacin metalloprotease-5	NvMep-5	Matrisome associated	ECM regulators	N0.HOG0000966	OG0000058	Cnidaria specific	Cnidaria specific	B3EWZ5.1	MAM and LDL-receptor class A domain-containing protein 1
NV2t016080001.1	https://simrbase.stowers.org/feature/Nematostella/vectensis/mRNA/NV2t016080001.1	NV2.16080	Zinc metalloproteinase nas-6	Meprin-like Astacin metalloprotease-6	NvMep-6	Matrisome associated	ECM regulators	N0.HOG0000375	OG0000005	Cnidaria specific	Cnidaria specific	Q9U3S9.2	Zinc metalloproteinase nas-6
NV2t016077001.1	https://simrbase.stowers.org/feature/Nematostella/vectensis/mRNA/NV2t016077001.1	NV2.16077	Metalloendopeptidase	Meprin-like Astacin metalloprotease-7	NvMep-7	Matrisome associated	ECM regulators	N0.HOG0000375	OG0000005	Cnidaria specific	Cnidaria specific	P55115.2	Zinc metalloproteinase nas-15
NV2t017021001.1	https://simrbase.stowers.org/feature/Nematostella/vectensis/mRNA/NV2t017021001.1	NV2.17021	Protein SpAN	Meprin-like Astacin metalloprotease-8	NvMep-8	Matrisome associated	ECM regulators	N0.HOG0000375	OG0000005	Cnidaria specific	Cnidaria specific	P98068.1	Protein SpAN	0.197775	candidate	1.0131	0.144233	0.129191	candidate	-1.38823	0.0574608	0.0116636	hit	2.40132	0.00501572
NV2t006019001.1	https://simrbase.stowers.org/feature/Nematostella/vectensis/mRNA/NV2t006019001.1	NV2.6019	Zinc metalloproteinase nas-13	Meprin-like Astacin metalloprotease-9	NvMep-9	Matrisome associated	ECM regulators	N0.HOG0000379	OG0000005	Cnidaria specific	Cnidaria specific	Q20191.5	Zinc metalloproteinase nas-13
NV2t025632001.1	https://simrbase.stowers.org/feature/Nematostella/vectensis/mRNA/NV2t025632001.1	NV2.25632	pregnancy-associated plasma protein A pappalysin	Pappalysin-1	NvPappa	Matrisome associated	ECM regulators	N0.HOG0001172	OG0000150			Q13219.3	Pappalysin-1
NV2t007036001.1	https://simrbase.stowers.org/feature/Nematostella/vectensis/mRNA/NV2t007036001.1	NV2.7036	Tyrosine-protein kinase transmembrane receptor ROR2	Plasminogen-related	NvPLG	Matrisome associated	ECM regulators	N0.HOG0000810	OG0000027			Q28198.1	Tissue-type plasminogen activator
NV2t009869001.1	https://simrbase.stowers.org/feature/Nematostella/vectensis/mRNA/NV2t009869001.1	NV2.9869	transglutaminase 1	Protein-glutamine gamma-glutamyltransferase K	NvGGGtfK	Matrisome associated	ECM regulators	N0.HOG0000914	OG0000044			P22758.2	Protein-glutamine gamma-glutamyltransferase K	0.0249428	candidate	-0.60264	0.0120613	0.016785	candidate	-0.771329	0.00329353	0.465599	no hit	0.168689	0.391741
NV2t003266001.1	https://simrbase.stowers.org/feature/Nematostella/vectensis/mRNA/NV2t003266001.1	NV2.3266	Mucin-6	Serine protease inhibitor-1	NvSerpin-like 1	Matrisome associated	ECM regulators	N0.HOG0001461	OG0000398	Cnidaria specific	Cnidaria specific	Q9IBG7.1	Kielin/chordin-like protein	0.113089	no hit	-0.548494	0.0747468	0.991233	no hit	-0.00499258	0.985573	0.116554	no hit	-0.543501	0.076938
NV2t021103001.1	https://simrbase.stowers.org/feature/Nematostella/vectensis/mRNA/NV2t021103001.1	NV2.21103	serpin family B member 1	Serine protease inhibitor-2	NvSerpin-like 2	Matrisome associated	ECM regulators	N0.HOG0000723	OG0000017			P30740.1	Leukocyte elastase inhibitor	0.000544391	hit	-1.82376	4.37314e-05	0.616889	no hit	-0.165154	0.487536	0.000551555	hit	-1.65861	8.57565e-05
NV2t014357001.1	https://simrbase.stowers.org/feature/Nematostella/vectensis/mRNA/NV2t014357001.1	NV2.14357	Dorsal-ventral patterning tolloid-like protein 1	Snake venom metalloproteinases (SVMP)-like-1	NvSVMP-like-1	Matrisome associated	ECM regulators	N0.HOG0002608	OG0001545	Cnidaria specific	Cnidaria specific	O57460.1	Dorsal-ventral patterning tolloid-like protein 1
NV2t014356001.1	https://simrbase.stowers.org/feature/Nematostella/vectensis/mRNA/NV2t014356001.1	NV2.14356	bone morphogenetic protein	Snake venom metalloproteinases (SVMP)-like-2	NvSVMP-like-2	Matrisome associated	ECM regulators	N0.HOG0000533	OG0000009			Q9U3S9.2	Zinc metalloproteinase nas-6	0.137011	no hit	-0.320359	0.0932212	0.116909	no hit	-0.38678	0.0505018	0.750552	no hit	0.0664209	0.702987
NV2t003671001.1	https://simrbase.stowers.org/feature/Nematostella/vectensis/mRNA/NV2t003671001.1	NV2.3671	TIMP metallopeptidase inhibitor 3	TIMP metalloprotease inhibitor-1	NvTIMP-1	Matrisome associated	ECM regulators	N0.HOG0001035	OG0000080			O02722.1	Metalloproteinase inhibitor 1	0.000940097	hit	-1.64393	0.000121171	0.119892	no hit	-0.538977	0.0521916	0.00476095	hit	-1.10496	0.00161676
NV2t003669001.1	https://simrbase.stowers.org/feature/Nematostella/vectensis/mRNA/NV2t003669001.1	NV2.3669	metalloproteinase inhibitor 4	TIMP metalloprotease inhibitor-2	NvTIMP-2	Matrisome associated	ECM regulators	N0.HOG0001035	OG0000080			P26652.2	Metalloproteinase inhibitor 3	0.242832	no hit	0.298382	0.182925	0.263804	no hit	-0.323494	0.1526	0.0305686	candidate	0.621876	0.0161657
NV2t017964001.1	https://simrbase.stowers.org/feature/Nematostella/vectensis/mRNA/NV2t017964001.1	NV2.17964	Derived by automated computational analysis using gene prediction method Gnomon	TIMP metalloprotease inhibitor-3	NvTIMP-3	Matrisome associated	ECM regulators	N0.HOG0001035	OG0000080			P39876.1	Metalloproteinase inhibitor 3	0.0161943	candidate	-0.757762	0.00706887	0.00326717	hit	-1.31312	0.000256021	0.0519374	no hit	0.555356	0.029991
NV2t002779001.1	https://simrbase.stowers.org/feature/Nematostella/vectensis/mRNA/NV2t002779001.1	NV2.2779	TIMP metallopeptidase inhibitor 1	TIMP metalloprotease inhibitor-4	NvTIMP-4	Matrisome associated	ECM regulators	N0.HOG0001035	OG0000080			Q9VH14.1	Tissue inhibitor of metalloproteinase
NV2t003100001.1	https://simrbase.stowers.org/feature/Nematostella/vectensis/mRNA/NV2t003100001.1	NV2.3100	tolloid	Tolloid metalloprotease	NvToll	Matrisome associated	ECM regulators	N0.HOG0000530	OG0000009	Cnidaria specific	Cnidaria specific	Q9DER7.1	Tolloid-like protein 1
NV2t021954001.1	https://simrbase.stowers.org/feature/Nematostella/vectensis/mRNA/NV2t021954001.1	NV2.21954	embryonic protein UVS	Tolloid-like metalloprotease	NvToll-like	Matrisome associated	ECM regulators	N0.HOG0000531	OG0000009			O57460.1	Dorsal-ventral patterning tolloid-like protein 1	0.00736754	candidate	-0.717557	0.0025835	0.0644259	no hit	-0.471611	0.0219722	0.238537	no hit	-0.245947	0.177177
NV2t003632001.1	https://simrbase.stowers.org/feature/Nematostella/vectensis/mRNA/NV2t003632001.1	NV2.3632	neural EGFL like	Trypsin Inhibitor-like	NvTryI-like	Matrisome associated	ECM regulators	N0.HOG0001461	OG0000398	Cnidaria specific	Cnidaria specific	Q9IBG7.1	Kielin/chordin-like protein	0.264467	no hit	-0.65185	0.202202	0.324477	no hit	0.651035	0.20271	0.0432531	hit	-1.30289	0.0241336
NV2t012418001.1	https://simrbase.stowers.org/feature/Nematostella/vectensis/mRNA/NV2t012418001.1	NV2.12418	Tyrosinase	Tyrosinase	NvTyr	Matrisome associated	ECM regulators					P55023.2	Tyrosinase	0.0103087	candidate	-0.939503	0.00398626	0.569681	no hit	-0.192966	0.434972	0.0257678	candidate	-0.746536	0.0130936
NV2t021577002.1	https://simrbase.stowers.org/feature/Nematostella/vectensis/mRNA/NV2t021577002.1	NV2.21577	Vitrin	vWFA and Ig domain-containing protein	NvvWFAIg	Matrisome associated	ECM regulators	N0.HOG0000311	OG0000004	Cnidaria specific	Cnidaria specific	No hit	No hit	0.00157829	hit	1.49805	0.000286072	0.000887534	hit	-2.06809	3.00563e-05	2.70164e-05	hit	3.56614	5.05128e-07
NV2t014043001.1	https://simrbase.stowers.org/feature/Nematostella/vectensis/mRNA/NV2t014043001.1	NV2.14043	fibulin 2	vWFA and Kazal domain repeat protein	NvvWFAKz-1	Matrisome associated	ECM regulators	N0.HOG0000597	OG0000010			A2ASQ1.1	Agrin	0.00156419	hit	-1.57195	0.000280036	0.0319765	candidate	-0.893554	0.00818456	0.0508599	candidate	-0.678391	0.0291604
NV2t014092001.1	https://simrbase.stowers.org/feature/Nematostella/vectensis/mRNA/NV2t014092001.1	NV2.14092	Agrin	vWFA, Gon and Kazal domain-containing protein	NvnWFAGonKz	Matrisome associated	ECM regulators	N0.HOG0000597	OG0000010			P31696.3	Agrin	0.000939478	hit	-1.87661	0.000120232	0.425577	no hit	-0.304733	0.291008	0.00164972	hit	-1.57187	0.0003992
NV2t019402002.1	https://simrbase.stowers.org/feature/Nematostella/vectensis/mRNA/NV2t019402002.1	NV2.19402	annexin A6	Annexin-1	NvAnnexin-1	Matrisome associated	ECM-affiliated proteins	N0.HOG0000779	OG0000022			P51901.1	Annexin A6
NV2t009562002.1	https://simrbase.stowers.org/feature/Nematostella/vectensis/mRNA/NV2t009562002.1	NV2.9562	Annexin A7	Annexin-2	NvAnnexin-2	Matrisome associated	ECM-affiliated proteins	N0.HOG0000786	OG0000022			P20073.3	Annexin A7	0.89982	no hit	0.0302966	0.87732	0.00982243	candidate	-0.90206	0.00147752	0.00379525	candidate	0.932356	0.00120707
NV2t010289001.1	https://simrbase.stowers.org/feature/Nematostella/vectensis/mRNA/NV2t010289001.1	NV2.10289	FBtr0089519	Annexin-3	NvAnnexin-3	Matrisome associated	ECM-affiliated proteins	N0.HOG0000787	OG0000022			P20073.3	Annexin A7	0.0020833	hit	1.04194	0.000445865	0.0148483	candidate	-0.776327	0.00274806	0.000134715	hit	1.81827	8.80837e-06
NV2t019403001.1	https://simrbase.stowers.org/feature/Nematostella/vectensis/mRNA/NV2t019403001.1	NV2.19403	annexin A10	Annexin-4	NvAnnexin-4	Matrisome associated	ECM-affiliated proteins	N0.HOG0000779	OG0000022			Q99JG3.3	Annexin A13
NV2t019404001.1	https://simrbase.stowers.org/feature/Nematostella/vectensis/mRNA/NV2t019404001.1	NV2.19404	annexin A6	Annexin-5	NvAnnexin-5	Matrisome associated	ECM-affiliated proteins	N0.HOG0000779	OG0000022			P20073.3	Annexin A7
NV2t006365001.1	https://simrbase.stowers.org/feature/Nematostella/vectensis/mRNA/NV2t006365001.1	NV2.6365	Kallmann syndrome 1 sequence	Anosmin-1-like	NvAnos1	Matrisome associated	ECM-affiliated proteins	N0.HOG0001300	OG0000248			P23352.3	Anosmin-1
NV2t004511001.1	https://simrbase.stowers.org/feature/Nematostella/vectensis/mRNA/NV2t004511001.1	NV2.4511	mRNA	Nematogalectin-like	NvNgalectin-like	Matrisome associated	ECM-affiliated proteins	N0.HOG0001085	OG0000100			Q28247.2	Collagen alpha-5(IV) chain
NV2t005188001.1	https://simrbase.stowers.org/feature/Nematostella/vectensis/mRNA/NV2t005188001.1	NV2.5188	domain-containing protein	Nematogalectin-2	NvNgalectin-2	Matrisome associated	ECM-affiliated proteins	N0.HOG0001084	OG0000100	Cnidaria specific	Cnidaria specific	P08125.4	Collagen alpha-1(X) chain
NV2t005196003.1	https://simrbase.stowers.org/feature/Nematostella/vectensis/mRNA/NV2t005196003.1	NV2.5196	L-rhamnose-binding lectin SML	Nematogalectin-3	NvNgalectin-3	Matrisome associated	ECM-affiliated proteins	N0.HOG0001082	OG0000100	Cnidaria specific	Cnidaria specific	Q28247.2	Collagen alpha-5(IV) chain	0.325046	no hit	-0.346381	0.257336	0.00154643	hit	-2.11283	7.55716e-05	0.00120318	hit	1.76645	0.00025977
NV2t005200001.1	https://simrbase.stowers.org/feature/Nematostella/vectensis/mRNA/NV2t005200001.1	NV2.5200	Protein eva-1 homolog C	Nematogalectin-1	NvNgalectin-1	Matrisome associated	ECM-affiliated proteins	N0.HOG0001083	OG0000100	Cnidaria specific	Cnidaria specific	P27393.1	Collagen alpha-2(IV) chain	0.311837	no hit	0.489229	0.245221	0.206238	no hit	-0.702879	0.109352	0.0299556	hit	1.19211	0.0157649
NV2t023165001.1	https://simrbase.stowers.org/feature/Nematostella/vectensis/mRNA/NV2t023165001.1	NV2.23165	mRNA	Collectin	NvCollectin	Matrisome associated	ECM-affiliated proteins					Q9WUB9.1	Macrophage receptor MARCO	0.0218091	candidate	-0.612153	0.0102216	0.000130559	hit	-2.818	3.34173e-07	5.91723e-05	hit	2.20585	2.17776e-06
NV2t011502001.1	https://simrbase.stowers.org/feature/Nematostella/vectensis/mRNA/NV2t011502001.1	NV2.11502	Complement component C8 beta chain	Complement component-like	NvComplC	Matrisome associated	ECM-affiliated proteins	N0.HOG0000168	OG0000002			Q8BH35.1	Complement component C8 beta chain
NV2t011374001.1	https://simrbase.stowers.org/feature/Nematostella/vectensis/mRNA/NV2t011374001.1	NV2.11374	C-reactive protein	C-reactive protein-like	NvCreact	Matrisome associated	ECM-affiliated proteins	N0.HOG0000010	OG0000000			O19062.1	C-reactive protein
NV2t020956001.1	https://simrbase.stowers.org/feature/Nematostella/vectensis/mRNA/NV2t020956001.1	NV2.20956	Collagen alpha-1(XII) chain	CTLD and vWFA domain-containing protein-1	NvCTLDvWFA-1	Matrisome associated	ECM-affiliated proteins	N0.HOG0000295	OG0000004	Cnidaria specific	Cnidaria specific	Q9UBG0.2	C-type mannose receptor 2	0.112646	no hit	-0.454838	0.0743656	0.0992494	no hit	0.543174	0.0400007	0.00566616	candidate	-0.998011	0.00202068
NV2t020957001.1	https://simrbase.stowers.org/feature/Nematostella/vectensis/mRNA/NV2t020957001.1	NV2.20957	Collagen alpha-1(XII) chain	CTLD and vWFA domain-containing protein-3	NvCTLDvWFA-3	Matrisome associated	ECM-affiliated proteins	N0.HOG0000295	OG0000004	Cnidaria specific	Cnidaria specific	P13944.3	Collagen alpha-1(XII) chain
NV2t007430001.1	https://simrbase.stowers.org/feature/Nematostella/vectensis/mRNA/NV2t007430001.1	NV2.7430	mRNA	CTLD protein-1	NvCTLD-1	Matrisome associated	ECM-affiliated proteins	N0.HOG0001438	OG0000376	Cnidaria specific	Cnidaria specific	Q96GW7.2	Brevican core protein
NV2t018171001.1	https://simrbase.stowers.org/feature/Nematostella/vectensis/mRNA/NV2t018171001.1	NV2.18171	Aggrecan core protein	CTLD protein-2	NvCTLD-2	Matrisome associated	ECM-affiliated proteins	N0.HOG0001328	OG0000273			Q28670.2	Aggrecan core protein
NV2t001101001.1	https://simrbase.stowers.org/feature/Nematostella/vectensis/mRNA/NV2t001101001.1	NV2.1101	Aggrecan core protein	CTLD protein-3	NvCTLD-3	Matrisome associated	ECM-affiliated proteins	N0.HOG0001438	OG0000376	Cnidaria specific	Cnidaria specific	Q64449.3	C-type mannose receptor 2
NV2t005627001.1	https://simrbase.stowers.org/feature/Nematostella/vectensis/mRNA/NV2t005627001.1	NV2.5627	mRNA	CTLD protein-4	NvCTLD-4	Matrisome associated	ECM-affiliated proteins					P27811.2	Killer cell lectin-like receptor subfamily B member 1A
NV2t005851001.1	https://simrbase.stowers.org/feature/Nematostella/vectensis/mRNA/NV2t005851001.1	NV2.5851	mRNA	CTLD protein-5	NvCTLD-5	Matrisome associated	ECM-affiliated proteins	N0.HOG0000227	OG0000003			P49300.1	C-type lectin domain family 10 member A
NV2t008276001.1	https://simrbase.stowers.org/feature/Nematostella/vectensis/mRNA/NV2t008276001.1	NV2.8276	Aggrecan core protein	CTLD protein-6	NvCTLD-6	Matrisome associated	ECM-affiliated proteins	N0.HOG0000234	OG0000003	Cnidaria specific	Cnidaria specific	P55068.2	Brevican core protein
NV2t008278001.1	https://simrbase.stowers.org/feature/Nematostella/vectensis/mRNA/NV2t008278001.1	NV2.8278	Aggrecan core protein	CTLD protein-7	NvCTLD-7	Matrisome associated	ECM-affiliated proteins	N0.HOG0000234	OG0000003	Cnidaria specific	Cnidaria specific	Q61361.2	Brevican core protein
NV2t018585001.1	https://simrbase.stowers.org/feature/Nematostella/vectensis/mRNA/NV2t018585001.1	NV2.18585	Brevican core protein	CTLD protein-8	NvCTLD-8	Matrisome associated	ECM-affiliated proteins	N0.HOG0000247	OG0000003	Cnidaria specific	Cnidaria specific	No hit	No hit	0.000559778	hit	1.93962	4.64595e-05	0.00226423	hit	-1.65315	0.000142871	2.5626e-05	hit	3.59277	4.64001e-07
NV2t010732001.1	https://simrbase.stowers.org/feature/Nematostella/vectensis/mRNA/NV2t010732001.1	NV2.10732	Blastula protease 10	CUB and Ig domain-containing protein	NvCUB-Ig	Matrisome associated	ECM-affiliated proteins	N0.HOG0000093	OG0000001	Cnidaria specific	Cnidaria specific	P42674.1	Blastula protease 10
NV2t003253001.1	https://simrbase.stowers.org/feature/Nematostella/vectensis/mRNA/NV2t003253001.1	NV2.3253	Bone morphogenetic protein 1	CUB and Thrombospondin type-1 domain-containing receptor protein	NvCUB-TSR	Matrisome associated	ECM-affiliated proteins	N0.HOG0001335	OG0000279	Cnidaria specific	Cnidaria specific	Q5BIR3.1	Thrombospondin type-1 domain-containing protein 1
NV2t021283001.1	https://simrbase.stowers.org/feature/Nematostella/vectensis/mRNA/NV2t021283001.1	NV2.21283	deleted in malignant brain tumors 1	CUB and zona pellucida like domains-1	NvCUB-ZP-1	Matrisome associated	ECM-affiliated proteins	N0.HOG0000705	OG0000015	Cnidaria specific	Cnidaria specific	G8HTB6.1	ZP domain-containing protein	0.17232	no hit	0.332608	0.122208	0.00347485	hit	-1.17845	0.000288031	0.000390275	hit	1.51106	5.14676e-05
NV2t021285001.1	https://simrbase.stowers.org/feature/Nematostella/vectensis/mRNA/NV2t021285001.1	NV2.21285	ZP domain-containing protein	CUB and zona pellucida like domains-2	NvCUB-ZP-2	Matrisome associated	ECM-affiliated proteins	N0.HOG0000705	OG0000015	Cnidaria specific	Cnidaria specific	G8HTB6.1	ZP domain-containing protein	0.0272526	candidate	-0.9254	0.0134734	0.00272401	hit	-1.91698	0.000183721	0.0200505	candidate	0.991577	0.00962353
NV2t017853001.1	https://simrbase.stowers.org/feature/Nematostella/vectensis/mRNA/NV2t017853001.1	NV2.17853	procollagen C-endopeptidase enhancer	CUB domain containing protein-1	NvCUB-misc-1	Matrisome associated	ECM-affiliated proteins	N0.HOG0000526	OG0000009			No hit	No hit
NV2t003067003.1	https://simrbase.stowers.org/feature/Nematostella/vectensis/mRNA/NV2t003067003.1	NV2.3067	Cubilin	CUB domain containing protein-5	NvCUB-misc-5	Matrisome associated	ECM-affiliated proteins	N0.HOG0001065	OG0000092	Cnidaria specific	Cnidaria specific	Q8R4W6.2	Procollagen C-endopeptidase enhancer 2	0.0036089	candidate	-0.788062	0.000973459	0.000537826	hit	-1.48492	1.22988e-05	0.0057382	candidate	0.696858	0.0020588
NV2t000027001.1	https://simrbase.stowers.org/feature/Nematostella/vectensis/mRNA/NV2t000027001.1	NV2.27	ferric chelate reductase 1	Ferric-chelate reductase 1-1	NvNADPH1-1	Matrisome associated	ECM-affiliated proteins	N0.HOG0000930	OG0000047			Q8K385.1	Ferric-chelate reductase 1	0.000774394	hit	-1.49938	8.62979e-05	0.0105721	candidate	-0.956265	0.00165481	0.0514241	no hit	-0.543117	0.0296137
NV2t000021001.1	https://simrbase.stowers.org/feature/Nematostella/vectensis/mRNA/NV2t000021001.1	NV2.21	ferric-chelate reductase 1	Ferric-chelate reductase 1-2	NvNADPH1-2	Matrisome associated	ECM-affiliated proteins	N0.HOG0000930	OG0000047			Q8K385.1	Ferric-chelate reductase 1	0.0373641	candidate	0.668491	0.0198775	0.0256627	candidate	-0.855432	0.00596164	0.00088663	hit	1.52392	0.000170311
NV2t019212001.1	https://simrbase.stowers.org/feature/Nematostella/vectensis/mRNA/NV2t019212001.1	NV2.19212	Fibropellin-1	Fras1/Frem extracellular matrix protein-like	NvFras	Matrisome associated	ECM-affiliated proteins	N0.HOG0001186	OG0000157			P10079.2	Fibropellin-1	0.0557514	no hit	0.487203	0.032239	0.647802	no hit	0.125098	0.524721	0.133921	no hit	0.362105	0.0905634
NV2t005939001.1	https://simrbase.stowers.org/feature/Nematostella/vectensis/mRNA/NV2t005939001.1	NV2.5939	Fibrillin-1	H-type lectin agglutinin	NvHLecAg	Matrisome associated	ECM-affiliated proteins	N0.HOG0000284	OG0000003			P98133.2	Fibrillin-1	0.786611	no hit	0.125427	0.74433	0.142944	candidate	-0.790537	0.0661668	0.0654993	candidate	0.915965	0.0391243
NV2t007079001.1	https://simrbase.stowers.org/feature/Nematostella/vectensis/mRNA/NV2t007079001.1	NV2.7079	Nidogen-1	Intelectin-like-1	NvIntL-like-1	Matrisome associated	ECM-affiliated proteins	N0.HOG0001275	OG0000224			P07207.3	Neurogenic locus Notch protein
NV2t022909001.1	https://simrbase.stowers.org/feature/Nematostella/vectensis/mRNA/NV2t022909001.1	NV2.22909	Fibropellin-3	Intelectin-like-2	NvIntL-like-2	Matrisome associated	ECM-affiliated proteins	N0.HOG0001275	OG0000224			P07207.3	Neurogenic locus Notch protein
NV2t023818001.1	https://simrbase.stowers.org/feature/Nematostella/vectensis/mRNA/NV2t023818001.1	NV2.23818	MAM and LDL-receptor class A domain-containing protein 2 (Fragment)	MAM and CTLD domain-containing lectin protein-1	NvMAMCTLD-1	Matrisome associated	ECM-affiliated proteins	N0.HOG0000971	OG0000058			B3EWZ6.1	MAM and LDL-receptor class A domain-containing protein 2
NV2t023715001.1	https://simrbase.stowers.org/feature/Nematostella/vectensis/mRNA/NV2t023715001.1	NV2.23715	MAM and LDL-receptor class A domain-containing protein 2 (Fragment)	MAM and CTLD domain-containing lectin protein-2	NvMAMCTLD-2	Matrisome associated	ECM-affiliated proteins	N0.HOG0000971	OG0000058			B3EWZ6.1	MAM and LDL-receptor class A domain-containing protein 2
NV2t019044001.1	https://simrbase.stowers.org/feature/Nematostella/vectensis/mRNA/NV2t019044001.1	NV2.19044	Macrophage mannose receptor 1	Mannose receptor-like lectin protein	NvManR	Matrisome associated	ECM-affiliated proteins	N0.HOG0002596	OG0001533	Cnidaria specific	Cnidaria specific	Q61830.2	Macrophage mannose receptor 1
NV2t016270001.1	https://simrbase.stowers.org/feature/Nematostella/vectensis/mRNA/NV2t016270001.1	NV2.16270	fibrillin 1	Mucin 4 homolog-1	NvMuc4-1	Matrisome associated	ECM-affiliated proteins	N0.HOG0000452	OG0000007			Q61554.2	Fibrillin-1
NV2t016273001.1	https://simrbase.stowers.org/feature/Nematostella/vectensis/mRNA/NV2t016273001.1	NV2.16273	Fc fragment of IgG binding protein	Mucin 4 homolog-2	NvMuc4-2	Matrisome associated	ECM-affiliated proteins	N0.HOG0000452	OG0000007			B3EWY9.1	No description found	0.97144	no hit	-0.0100335	0.964363	0.233095	no hit	0.368647	0.12896	0.17069	no hit	-0.37868	0.120268
NV2t012620001.1	https://simrbase.stowers.org/feature/Nematostella/vectensis/mRNA/NV2t012620001.1	NV2.12620	heart development protein with EGF like domains 1	Mucin-like-1	NvMuc-like-1	Matrisome associated	ECM-affiliated proteins	N0.HOG0002633	OG0001570	Cnidaria specific	Cnidaria specific	No hit	No hit
NV2t017784001.1	https://simrbase.stowers.org/feature/Nematostella/vectensis/mRNA/NV2t017784001.1	NV2.17784	mRNA	Mucin-like-10	NvMuc-like-10	Matrisome associated	ECM-affiliated proteins					No hit	No hit
NV2t019027001.1	https://simrbase.stowers.org/feature/Nematostella/vectensis/mRNA/NV2t019027001.1	NV2.19027	mRNA	Mucin-like-11	NvMuc-like-11	Matrisome associated	ECM-affiliated proteins	N0.HOG0001350	OG0000291			No hit	No hit
NV2t024863002.1	https://simrbase.stowers.org/feature/Nematostella/vectensis/mRNA/NV2t024863002.1	NV2.24863	mRNA	Mucin-like-2	NvMuc-like-2	Matrisome associated	ECM-affiliated proteins	N0.HOG0001294	OG0000242			No hit	No hit
NV2t001129001.1	https://simrbase.stowers.org/feature/Nematostella/vectensis/mRNA/NV2t001129001.1	NV2.1129	mRNA	Mucin-like-3	NvMuc-like-3	Matrisome associated	ECM-affiliated proteins	N0.HOG0000929	OG0000046	Cnidaria specific	Cnidaria specific	No hit	No hit
NV2t002216004.1	https://simrbase.stowers.org/feature/Nematostella/vectensis/mRNA/NV2t002216004.1	NV2.2216	von Willebrand factor D and EGF domains	Mucin-like-4	NvMuc-like-4	Matrisome associated	ECM-affiliated proteins	N0.HOG0000840	OG0000031			Q8N2E2.4	von Willebrand factor D and EGF domain-containing protein	0.794554	no hit	0.0520287	0.753567	0.439267	no hit	-0.176415	0.302704	0.254719	no hit	0.228444	0.191653
NV2t006919001.1	https://simrbase.stowers.org/feature/Nematostella/vectensis/mRNA/NV2t006919001.1	NV2.6919	Neurogenic locus notch homolog protein 1	Mucin-like-5	NvMuc-like-5	Matrisome associated	ECM-affiliated proteins	N0.HOG0000654	OG0000012			Q07008.3	Neurogenic locus notch homolog protein 1
NV2t012174001.1	https://simrbase.stowers.org/feature/Nematostella/vectensis/mRNA/NV2t012174001.1	NV2.12174	mucin 1	Mucin-like-6	NvMuc-like-6	Matrisome associated	ECM-affiliated proteins	N0.HOG0000285	OG0000003	Cnidaria specific	Cnidaria specific	No hit	No hit	0.000360977	hit	-1.97992	1.76039e-05	0.0965341	no hit	-0.539153	0.0381841	0.000883855	hit	-1.44076	0.00016856
NV2t012741001.1	https://simrbase.stowers.org/feature/Nematostella/vectensis/mRNA/NV2t012741001.1	NV2.12741	mRNA	Mucin-like-7	NvMuc-like-7	Matrisome associated	ECM-affiliated proteins	N0.HOG0001586	OG0000523			P98133.2	Fibrillin-1
NV2t012902001.1	https://simrbase.stowers.org/feature/Nematostella/vectensis/mRNA/NV2t012902001.1	NV2.12902	mucin 6 oligomeric mucus/gel-forming	Mucin-like-8	NvMuc-like-8	Matrisome associated	ECM-affiliated proteins	N0.HOG0000643	OG0000012	Cnidaria specific	Cnidaria specific	Q9HC84.3	Mucin-5B	0.00610885	candidate	-0.869275	0.001999	0.0015754	hit	-1.42752	7.7855e-05	0.0367967	no hit	0.558243	0.0200749
NV2t016210001.1	https://simrbase.stowers.org/feature/Nematostella/vectensis/mRNA/NV2t016210001.1	NV2.16210	Derived by automated computational analysis using gene prediction method Gnomon	Mucin-like-9	NvMuc-like-9	Matrisome associated	ECM-affiliated proteins	N0.HOG0000645	OG0000012			Q2PC93.1	SCO-spondin
NV2t005928002.1	https://simrbase.stowers.org/feature/Nematostella/vectensis/mRNA/NV2t005928002.1	NV2.5928	Killer cell lectin-like receptor subfamily B member 1	Nattectin-like	NvNat-like	Matrisome associated	ECM-affiliated proteins	N0.HOG0000254	OG0000003	Cnidaria specific	Cnidaria specific	Q0ZUP0.1	Killer cell lectin-like receptor subfamily B member 1
NV2t015872001.1	https://simrbase.stowers.org/feature/Nematostella/vectensis/mRNA/NV2t015872001.1	NV2.15872	Aggrecan core protein	NOWA-1	NvNOWA-1	Matrisome associated	ECM-affiliated proteins	N0.HOG0000259	OG0000003	Cnidaria specific	Cnidaria specific	No hit	No hit	0.00092228	hit	1.63993	0.000114253	0.000390318	hit	-2.4577	6.10924e-06	1.23168e-05	hit	4.09763	1.22856e-07
NV2t010392003.1	https://simrbase.stowers.org/feature/Nematostella/vectensis/mRNA/NV2t010392003.1	NV2.10392	Brevican core protein	NOWA-2	NvNOWA-2	Matrisome associated	ECM-affiliated proteins	N0.HOG0000260	OG0000003	Cnidaria specific	Cnidaria specific	No hit	No hit	0.0945863	candidate	-0.666543	0.0604131	0.00327302	hit	-1.89444	0.000261742	0.00939938	hit	1.2279	0.00384411
NV2t010388002.1	https://simrbase.stowers.org/feature/Nematostella/vectensis/mRNA/NV2t010388002.1	NV2.10388	Type-2 ice-structuring protein	NOWA-3	NvNOWA-3	Matrisome associated	ECM-affiliated proteins	N0.HOG0000260	OG0000003	Cnidaria specific	Cnidaria specific	No hit	No hit	0.000683748	hit	1.54737	6.90614e-05	0.000814335	hit	-1.77941	2.53575e-05	1.66415e-05	hit	3.32678	2.25851e-07
NV2t010390001.1	https://simrbase.stowers.org/feature/Nematostella/vectensis/mRNA/NV2t010390001.1	NV2.10390	Type-2 ice-structuring protein	NOWA-4	NvNOWA-4	Matrisome associated	ECM-affiliated proteins	N0.HOG0000260	OG0000003	Cnidaria specific	Cnidaria specific	A0ZT93.1	Type-2 ice-structuring protein
NV2t010391001.1	https://simrbase.stowers.org/feature/Nematostella/vectensis/mRNA/NV2t010391001.1	NV2.10391	Galactose-specific lectin nattectin	NOWA-related	NvNOWA-related	Matrisome associated	ECM-affiliated proteins	N0.HOG0000260	OG0000003	Cnidaria specific	Cnidaria specific	Q6UXS0.2	C-type lectin domain family 19 member A
NV2t005576001.1	https://simrbase.stowers.org/feature/Nematostella/vectensis/mRNA/NV2t005576001.1	NV2.5576	Sushi	PAN/Apple and EGF domain-containing lectin protein-1	NvPAN-App-EGF-1	Matrisome associated	ECM-affiliated proteins	N0.HOG0002630	OG0001567			Q4LDE5.3	Sushi, von Willebrand factor type A, EGF and pentraxin domain-containing protein 1
NV2t020124003.1	https://simrbase.stowers.org/feature/Nematostella/vectensis/mRNA/NV2t020124003.1	NV2.20124	Fibropellin-3	PAN/Apple and EGF domain-containing lectin protein-2	NvPAN-App-EGF-2	Matrisome associated	ECM-affiliated proteins	N0.HOG0000480	OG0000008			P49013.1	Fibropellin-3
NV2t018114001.1	https://simrbase.stowers.org/feature/Nematostella/vectensis/mRNA/NV2t018114001.1	NV2.18114	C-type lectin domain family 2 member	PAN/Apple domain-containing lectin protein-1	NvPALec-1	Matrisome associated	ECM-affiliated proteins	N0.HOG0000255	OG0000003			Q8K4Q8.1	Collectin-12
NV2t020522001.1	https://simrbase.stowers.org/feature/Nematostella/vectensis/mRNA/NV2t020522001.1	NV2.20522	Matrilin-3	CTLD and vWFA domain-containing protein-2	NvCTLDvWFA-2	Matrisome associated	ECM-affiliated proteins	N0.HOG0000295	OG0000004	Cnidaria specific	Cnidaria specific	Q60847.3	Collagen alpha-1(XII) chain	0.00405757	candidate	-0.886341	0.00113602	0.0135621	candidate	-0.783778	0.00238185	0.646571	no hit	-0.102563	0.582308
NV2t016433001.1	https://simrbase.stowers.org/feature/Nematostella/vectensis/mRNA/NV2t016433001.1	NV2.16433	sushi domain containing 2	Protein mesh homolog	NvMesh	Matrisome associated	ECM-affiliated proteins	N0.HOG0000451	OG0000007			Q0KHY3.2	Protein mesh	0.0419547	candidate	-0.745321	0.0227161	0.152451	no hit	-0.546676	0.0728187	0.546096	no hit	-0.198646	0.474301
NV2t013381001.1	https://simrbase.stowers.org/feature/Nematostella/vectensis/mRNA/NV2t013381001.1	NV2.13381	Xylosyltransferase oxt	SEA and WSC domain-containing protein-1	NvSEA-WSC-1	Matrisome associated	ECM-affiliated proteins	N0.HOG0001244	OG0000197			Q5QQ53.1	Xylosyltransferase oxt
NV2t015283001.1	https://simrbase.stowers.org/feature/Nematostella/vectensis/mRNA/NV2t015283001.1	NV2.15283	Kremen protein 1	SEA and WSC domain-containing protein-2	NvSEA-WSC-2	Matrisome associated	ECM-affiliated proteins	N0.HOG0001244	OG0000197			Q96MU8.3	Kremen protein 1
NV2t014509001.1	https://simrbase.stowers.org/feature/Nematostella/vectensis/mRNA/NV2t014509001.1	NV2.14509	mRNA	SEA domain-containing receptor protein	NvSEAR	Matrisome associated	ECM-affiliated proteins	N0.HOG0001645	OG0000582			Q9H195.3	Mucin-3B
NV2t003407001.1	https://simrbase.stowers.org/feature/Nematostella/vectensis/mRNA/NV2t003407001.1	NV2.3407	Protocadherin-like wing polarity protein stan	Selectin-related protein-1	NvSel-related-1	Matrisome associated	ECM-affiliated proteins	N0.HOG0000496	OG0000008			Q9V5N8.4	Protocadherin-like wing polarity protein stan
NV2t017145002.1	https://simrbase.stowers.org/feature/Nematostella/vectensis/mRNA/NV2t017145002.1	NV2.17145	von Willebrand factor A domain-containing protein 2	Selectin-related protein-2	NvSel-related-2	Matrisome associated	ECM-affiliated proteins	N0.HOG0000476	OG0000008			Q6DCQ6.1	von Willebrand factor A domain-containing protein 2
NV2t011758001.1	https://simrbase.stowers.org/feature/Nematostella/vectensis/mRNA/NV2t011758001.1	NV2.11758	Semaphorin 5c	Semaphorin-5B	NvSEMA5B	Matrisome associated	ECM-affiliated proteins	N0.HOG0000159	OG0000002			Q60519.2	Semaphorin-5B	0.00548218	hit	1.5789	0.00170111	0.208134	no hit	0.611162	0.110652	0.0397236	candidate	0.967739	0.0218828
NV2t007220001.1	https://simrbase.stowers.org/feature/Nematostella/vectensis/mRNA/NV2t007220001.1	NV2.7220	Semaphorin-5B	Semaphorin-like-1	NvSEMA-like-1	Matrisome associated	ECM-affiliated proteins	N0.HOG0000172	OG0000002	Cnidaria specific	Cnidaria specific	D3ZTD8.1	Semaphorin-5A	0.00014814	hit	-2.3588	1.14786e-06	0.021365	candidate	-0.699909	0.00464822	0.000189679	hit	-1.6589	1.60897e-05
NV2t022863003.1	https://simrbase.stowers.org/feature/Nematostella/vectensis/mRNA/NV2t022863003.1	NV2.22863	Semaphorin-3E	Semaphorin-like-2	NvSEMA-like-2	Matrisome associated	ECM-affiliated proteins	N0.HOG0000160	OG0000002			O15041.1	Semaphorin-3E
NV2t022444002.1	https://simrbase.stowers.org/feature/Nematostella/vectensis/mRNA/NV2t022444002.1	NV2.22444	NV2t022444002.1	Snaclec-like-2	NvSnaclec-like-2	Matrisome associated	ECM-affiliated proteins					P08290.4	Asialoglycoprotein receptor 2
NV2t013847001.1	https://simrbase.stowers.org/feature/Nematostella/vectensis/mRNA/NV2t013847001.1	NV2.13847	asialoglycoprotein receptor 1	Snaclec-like-3	NvSnaclec-like-3	Matrisome associated	ECM-affiliated proteins	N0.HOG0000255	OG0000003			P86854.1	Perlucin-like protein	0.0542698	no hit	-0.523207	0.0311579	0.101397	no hit	0.487097	0.0412257	0.00330987	hit	-1.0103	0.00101426
NV2t014543001.1	https://simrbase.stowers.org/feature/Nematostella/vectensis/mRNA/NV2t014543001.1	NV2.14543	C-type lectin domain-containing protein	Snaclec-like-4	NvSnaclec-like-4	Matrisome associated	ECM-affiliated proteins	N0.HOG0000255	OG0000003			Q8WPD0.1	Alpha-N-acetylgalactosamine-specific lectin	0.00444955	hit	1.94888	0.00129571	0.039735	hit	-1.31974	0.0112187	0.000326219	hit	3.26862	4.01915e-05
NV2t006659001.1	https://simrbase.stowers.org/feature/Nematostella/vectensis/mRNA/NV2t006659001.1	NV2.6659	Syndecan	Syndecan	NvSynd	Matrisome associated	ECM-affiliated proteins	N0.HOG0001120	OG0000120			P34741.2	Syndecan-2
NV2t016335001.1	https://simrbase.stowers.org/feature/Nematostella/vectensis/mRNA/NV2t016335001.1	NV2.16335	trichohyalin	vWFA and ConA lectin domain-containing protein-1	NvvWFAConA-1	Matrisome associated	ECM-affiliated proteins	N0.HOG0000228	OG0000003			No hit	No hit	0.305071	no hit	-0.30952	0.239059	0.238808	no hit	-0.406666	0.133257	0.748373	no hit	0.0971461	0.700062
NV2t016336001.1	https://simrbase.stowers.org/feature/Nematostella/vectensis/mRNA/NV2t016336001.1	NV2.16336	Matrilin-4	vWFA and ConA lectin domain-containing protein-2	NvvWFAConA-2	Matrisome associated	ECM-affiliated proteins	N0.HOG0000310	OG0000004	Cnidaria specific	Cnidaria specific	A6H584.4	Collagen alpha-5(VI) chain	0.467318	no hit	-0.275799	0.394722	0.127079	candidate	-0.684857	0.0561459	0.284919	no hit	0.409058	0.21903
NV2t016343002.1	https://simrbase.stowers.org/feature/Nematostella/vectensis/mRNA/NV2t016343002.1	NV2.16343	Cochlin	vWFA and ConA lectin domain-containing protein-3	NvvWFAConA-3	Matrisome associated	ECM-affiliated proteins	N0.HOG0000310	OG0000004	Cnidaria specific	Cnidaria specific	O42163.1	Cochlin
NV2t016338002.1	https://simrbase.stowers.org/feature/Nematostella/vectensis/mRNA/NV2t016338002.1	NV2.16338	Collagen alpha-5(VI) chain	vWFA and ConA lectin domain-containing protein-4	NvvWFAConA-4	Matrisome associated	ECM-affiliated proteins	N0.HOG0000310	OG0000004	Cnidaria specific	Cnidaria specific	A2AX52.2	Collagen alpha-4(VI) chain	0.605292	no hit	-0.237028	0.540699	0.445608	no hit	0.402092	0.310039	0.174286	candidate	-0.63912	0.123348
NV2t002978001.1	https://simrbase.stowers.org/feature/Nematostella/vectensis/mRNA/NV2t002978001.1	NV2.2978	bone morphogenetic protein	Anti-dorsalizing morphogenetic protein 1-related	NvAdmp-1	Matrisome associated	Secreted factors	N0.HOG0000747	OG0000019			P07713.2	Protein decapentaplegic
NV2t019847002.1	https://simrbase.stowers.org/feature/Nematostella/vectensis/mRNA/NV2t019847002.1	NV2.19847	Bone morphogenetic protein 2	Bone morphogenetic protein 2, TGF-beta family	NvBMP2	Matrisome associated	Secreted factors	N0.HOG0000745	OG0000019			P12643.1	Bone morphogenetic protein 2
NV2t006269001.1	https://simrbase.stowers.org/feature/Nematostella/vectensis/mRNA/NV2t006269001.1	NV2.6269	bone morphogenetic protein 6	Bone morphogenetic protein 7, TGF-beta family	NvBMP7	Matrisome associated	Secreted factors	N0.HOG0000744	OG0000019			P23359.2	Bone morphogenetic protein 7
NV2t014185001.1	https://simrbase.stowers.org/feature/Nematostella/vectensis/mRNA/NV2t014185001.1	NV2.14185	chordin	Chordin	NvChrd	Matrisome associated	Secreted factors	N0.HOG0001060	OG0000089			Q91713.1	Chordin
NV2t022735001.1	https://simrbase.stowers.org/feature/Nematostella/vectensis/mRNA/NV2t022735001.1	NV2.22735	chordin like 1	Chordin-like	NvChrd-like	Matrisome associated	Secreted factors	N0.HOG0001061	OG0000089			Q9BU40.2	Chordin-like protein 1
NV2t014699001.1	https://simrbase.stowers.org/feature/Nematostella/vectensis/mRNA/NV2t014699001.1	NV2.14699	CUB domain-containing protein 2	CUB domain containing protein-2	NvCUB-misc-2	Matrisome associated	Secreted factors	N0.HOG0000541	OG0000009	Cnidaria specific	Cnidaria specific	Q62381.1	Tolloid-like protein 1
NV2t003898001.1	https://simrbase.stowers.org/feature/Nematostella/vectensis/mRNA/NV2t003898001.1	NV2.3898	Cubilin	CUB domain containing protein-3	NvCUB-misc-3	Matrisome associated	Secreted factors	N0.HOG0001941	OG0000878	Cnidaria specific	Cnidaria specific	Q60997.2	Scavenger receptor cysteine-rich domain-containing protein DMBT1	0.970786	no hit	0.00827775	0.963523	0.00578448	candidate	-0.94827	0.000654995	0.00228894	candidate	0.956548	0.000619423
NV2t002661001.1	https://simrbase.stowers.org/feature/Nematostella/vectensis/mRNA/NV2t002661001.1	NV2.2661	Bone morphogenetic protein 1	CUB domain containing protein-4	NvCUB-misc-4	Matrisome associated	Secreted factors	N0.HOG0003070	OG0002007	Cnidaria specific	Cnidaria specific	P98063.2	Bone morphogenetic protein 1
NV2t005910001.1	https://simrbase.stowers.org/feature/Nematostella/vectensis/mRNA/NV2t005910001.1	NV2.5910	Nimrod B2	Delta and Notch-like epidermal growth factor-related receptor-1	NvDllR-1	Matrisome associated	Secreted factors	N0.HOG0000466	OG0000008	Cnidaria specific	Cnidaria specific	P10079.2	Fibropellin-1	0.0538979	no hit	0.47068	0.030836	0.0553381	no hit	-0.534717	0.0178359	0.00201473	hit	1.0054	0.0005246
NV2t022236001.1	https://simrbase.stowers.org/feature/Nematostella/vectensis/mRNA/NV2t022236001.1	NV2.22236	delta/notch like EGF repeat containing	Delta and Notch-like epidermal growth factor-related receptor-2	NvDllR-2	Matrisome associated	Secreted factors	N0.HOG0001253	OG0000203			Q8NFT8.1	Delta and Notch-like epidermal growth factor-related receptor
NV2t020618001.1	https://simrbase.stowers.org/feature/Nematostella/vectensis/mRNA/NV2t020618001.1	NV2.20618	Delta-like protein	Delta-like-1	NvDll-like 1	Matrisome associated	Secreted factors	N0.HOG0000978	OG0000062	Cnidaria specific	Cnidaria specific	P10079.2	Fibropellin-1
NV2t020616003.1	https://simrbase.stowers.org/feature/Nematostella/vectensis/mRNA/NV2t020616003.1	NV2.20616	Delta-like protein 1	Delta-like-2	NvDll-like 2	Matrisome associated	Secreted factors	N0.HOG0000981	OG0000062			P97677.1	Delta-like protein 1
NV2t000128001.1	https://simrbase.stowers.org/feature/Nematostella/vectensis/mRNA/NV2t000128001.1	NV2.128	hedgehog	Desert hedgehog protein A	NvDhhA	Matrisome associated	Secreted factors	N0.HOG0000984	OG0000063			Q91610.1	Desert hedgehog protein A
NV2t022707001.1	https://simrbase.stowers.org/feature/Nematostella/vectensis/mRNA/NV2t022707001.1	NV2.22707	ectodysplasin A	Ectodysplasin-A-like-1	NvEda-like-1	Matrisome associated	Secreted factors	N0.HOG0000891	OG0000038	Cnidaria specific	Cnidaria specific	Q8K4G2.2	No description found
NV2t022131001.1	https://simrbase.stowers.org/feature/Nematostella/vectensis/mRNA/NV2t022131001.1	NV2.22131	mRNA	Ectodysplasin-A-like-2	NvEda-like-2	Matrisome associated	Secreted factors	N0.HOG0000889	OG0000038	Cnidaria specific	Cnidaria specific	No hit	No hit
NV2t022054001.1	https://simrbase.stowers.org/feature/Nematostella/vectensis/mRNA/NV2t022054001.1	NV2.22054	complement C1q A chain	Ectodysplasin-A-like-3	NvEda-like-3	Matrisome associated	Secreted factors	N0.HOG0000890	OG0000038			No hit	No hit
NV2t022056001.1	https://simrbase.stowers.org/feature/Nematostella/vectensis/mRNA/NV2t022056001.1	NV2.22056	ectodysplasin A	Ectodysplasin-A-like-4	NvEda-like-4	Matrisome associated	Secreted factors	N0.HOG0000890	OG0000038			Q810Y4.1	No description found
NV2t022058001.1	https://simrbase.stowers.org/feature/Nematostella/vectensis/mRNA/NV2t022058001.1	NV2.22058	TNF_2 domain-containing protein	Ectodysplasin-A-like-5	NvEda-like-5	Matrisome associated	Secreted factors	N0.HOG0000890	OG0000038			Q92838.2	Ectodysplasin-A
NV2t016522001.1	https://simrbase.stowers.org/feature/Nematostella/vectensis/mRNA/NV2t016522001.1	NV2.16522	Muscle	EGF and Ig domain-containing protein	NvEGF-Ig	Matrisome associated	Secreted factors	N0.HOG0002634	OG0001571	Cnidaria specific	Cnidaria specific	Q62838.1	Muscle, skeletal receptor tyrosine protein kinase	0.0025575	hit	-1.08851	0.000598136	0.430901	no hit	-0.222419	0.295242	0.00655279	candidate	-0.866089	0.00244005
NV2t014162001.1	https://simrbase.stowers.org/feature/Nematostella/vectensis/mRNA/NV2t014162001.1	NV2.14162	FBtr0343644	EGF-like repeat protein-1	NvPolyEGF-1	Matrisome associated	Secreted factors	N0.HOG0000858	OG0000034			A0JM12.1	Multiple epidermal growth factor-like domains protein 10
NV2t025193001.1	https://simrbase.stowers.org/feature/Nematostella/vectensis/mRNA/NV2t025193001.1	NV2.25193	Nimrod C2	EGF-like repeat protein-2	NvPolyEGF-2	Matrisome associated	Secreted factors	N0.HOG0000883	OG0000036			O42182.1	Fibulin-1
NV2t025171001.1	https://simrbase.stowers.org/feature/Nematostella/vectensis/mRNA/NV2t025171001.1	NV2.25171	EGF like domain multiple 7	Epidermal growth factor-like protein 8-like	NvEGF-like	Matrisome associated	Secreted factors	N0.HOG0000882	OG0000036			Q6GUQ1.2	Epidermal growth factor-like protein 8
NV2t001244001.1	https://simrbase.stowers.org/feature/Nematostella/vectensis/mRNA/NV2t001244001.1	NV2.1244	mRNA	Fibrinogen-related protein-1	NvFREP-1	Matrisome associated	Secreted factors	N0.HOG0000929	OG0000046	Cnidaria specific	Cnidaria specific	P02675.2	Fibrinogen beta chain
NV2t019426002.1	https://simrbase.stowers.org/feature/Nematostella/vectensis/mRNA/NV2t019426002.1	NV2.19426	NV2t019426002.1	Fibrinogen-related protein-10	NvFREP-10	Matrisome associated	Secreted factors	N0.HOG0001056	OG0000086			Q9BZ76.3	Contactin-associated protein-like 3
NV2t022115001.1	https://simrbase.stowers.org/feature/Nematostella/vectensis/mRNA/NV2t022115001.1	NV2.22115	Angiopoietin-related protein 7	Fibrinogen-related protein-11	NvFREP-11	Matrisome associated	Secreted factors	N0.HOG0000023	OG0000000	Cnidaria specific	Cnidaria specific	O43827.1	Angiopoietin-related protein 7
NV2t024719001.1	https://simrbase.stowers.org/feature/Nematostella/vectensis/mRNA/NV2t024719001.1	NV2.24719	mRNA	Fibrinogen-related protein-12	NvFREP-12	Matrisome associated	Secreted factors	N0.HOG0000929	OG0000046	Cnidaria specific	Cnidaria specific	Q9U8W7.1	Techylectin-5B
NV2t007282001.1	https://simrbase.stowers.org/feature/Nematostella/vectensis/mRNA/NV2t007282001.1	NV2.7282	Contactin-associated protein-like 2	Fibrinogen-related protein-13	NvFREP-13	Matrisome associated	Secreted factors	N0.HOG0000928	OG0000046	Cnidaria specific	Cnidaria specific	Q63207.1	Coagulation factor X
NV2t025466001.1	https://simrbase.stowers.org/feature/Nematostella/vectensis/mRNA/NV2t025466001.1	NV2.25466	mRNA	Fibrinogen-related protein-14	NvFREP-14	Matrisome associated	Secreted factors	N0.HOG0001056	OG0000086			Q5PPM0.1	Intelectin-1
NV2t022910001.1	https://simrbase.stowers.org/feature/Nematostella/vectensis/mRNA/NV2t022910001.1	NV2.22910	mRNA	Fibrinogen-related protein-15	NvFREP-15	Matrisome associated	Secreted factors	N0.HOG0000928	OG0000046	Cnidaria specific	Cnidaria specific	A0A1D5NSM8.1	Sushi, von Willebrand factor type A, EGF and pentraxin domain-containing protein 1
NV2t000566001.1	https://simrbase.stowers.org/feature/Nematostella/vectensis/mRNA/NV2t000566001.1	NV2.566	mRNA	Fibrinogen-related protein-16	NvFREP-16	Matrisome associated	Secreted factors	N0.HOG0000929	OG0000046	Cnidaria specific	Cnidaria specific	P19477.1	Fibrinogen-like protein A
NV2t002132001.1	https://simrbase.stowers.org/feature/Nematostella/vectensis/mRNA/NV2t002132001.1	NV2.2132	mRNA	Fibrinogen-related protein-17	NvFREP-17	Matrisome associated	Secreted factors	N0.HOG0002224	OG0001161	Cnidaria specific	Cnidaria specific	Q9WVH6.1	Angiopoietin-4
NV2t002698002.1	https://simrbase.stowers.org/feature/Nematostella/vectensis/mRNA/NV2t002698002.1	NV2.2698	mRNA	Fibrinogen-related protein-18	NvFREP-18	Matrisome associated	Secreted factors	N0.HOG0000929	OG0000046	Cnidaria specific	Cnidaria specific	Q61483.2	Delta-like protein 1
NV2t004753001.1	https://simrbase.stowers.org/feature/Nematostella/vectensis/mRNA/NV2t004753001.1	NV2.4753	Fibrinogen C domain-containing protein 1	Fibrinogen-related protein-19	NvFREP-19	Matrisome associated	Secreted factors	N0.HOG0000929	OG0000046	Cnidaria specific	Cnidaria specific	Q95LU3.1	No description found
NV2t001985001.1	https://simrbase.stowers.org/feature/Nematostella/vectensis/mRNA/NV2t001985001.1	NV2.1985	mRNA	Fibrinogen-related protein-2	NvFREP-2	Matrisome associated	Secreted factors	N0.HOG0001055	OG0000086			Q3SZZ7.1	Fibrinogen-like protein 1
NV2t005688002.1	https://simrbase.stowers.org/feature/Nematostella/vectensis/mRNA/NV2t005688002.1	NV2.5688	Fibrinogen C domain-containing protein 1	Fibrinogen-related protein-20	NvFREP-20	Matrisome associated	Secreted factors	N0.HOG0000026	OG0000000			Q95LU3.1	No description found
NV2t006010001.1	https://simrbase.stowers.org/feature/Nematostella/vectensis/mRNA/NV2t006010001.1	NV2.6010	Fibrinogen C-terminal domain-containing protein	Fibrinogen-related protein-21	NvFREP-21	Matrisome associated	Secreted factors	N0.HOG0000026	OG0000000			Q8N539.2	No description found
NV2t007679001.1	https://simrbase.stowers.org/feature/Nematostella/vectensis/mRNA/NV2t007679001.1	NV2.7679	Ficolin-1	Fibrinogen-related protein-22	NvFREP-22	Matrisome associated	Secreted factors	N0.HOG0001156	OG0000139			Q7ZT75.2	Ficolin-1-A
NV2t009815001.1	https://simrbase.stowers.org/feature/Nematostella/vectensis/mRNA/NV2t009815001.1	NV2.9815	MAM and LDL-receptor class A domain-containing protein 1 (Fragment)	Fibrinogen-related protein-23	NvFREP-23	Matrisome associated	Secreted factors	N0.HOG0000970	OG0000058	Cnidaria specific	Cnidaria specific	B3EWZ5.1	MAM and LDL-receptor class A domain-containing protein 1
NV2t011287001.1	https://simrbase.stowers.org/feature/Nematostella/vectensis/mRNA/NV2t011287001.1	NV2.11287	Epididymal sperm-binding protein 1	Fibrinogen-related protein-24	NvFREP-24	Matrisome associated	Secreted factors	N0.HOG0001194	OG0000160			Q7YR83.1	Epididymal sperm-binding protein 1
NV2t012036001.1	https://simrbase.stowers.org/feature/Nematostella/vectensis/mRNA/NV2t012036001.1	NV2.12036	mRNA	Fibrinogen-related protein-25	NvFREP-25	Matrisome associated	Secreted factors	N0.HOG0000929	OG0000046	Cnidaria specific	Cnidaria specific	Q09163.1	Protein delta homolog 1
NV2t013457001.1	https://simrbase.stowers.org/feature/Nematostella/vectensis/mRNA/NV2t013457001.1	NV2.13457	Uncharacterized skeletal organic matrix protein 5	Fibrinogen-related protein-26	NvFREP-26	Matrisome associated	Secreted factors	N0.HOG0001008	OG0000069	Cnidaria specific	Cnidaria specific	B8VIU6.1	Uncharacterized skeletal organic matrix protein 5
NV2t022610001.1	https://simrbase.stowers.org/feature/Nematostella/vectensis/mRNA/NV2t022610001.1	NV2.22610	Fibrinogen C domain-containing protein 1	Fibrinogen-related protein-27	NvFREP-27	Matrisome associated	Secreted factors	N0.HOG0000026	OG0000000			D8VNS8.1	Ryncolin-2
NV2t025688001.1	https://simrbase.stowers.org/feature/Nematostella/vectensis/mRNA/NV2t025688001.1	NV2.25688	mRNA	Fibrinogen-related protein-28	NvFREP-28	Matrisome associated	Secreted factors	N0.HOG0000929	OG0000046	Cnidaria specific	Cnidaria specific	Q90Y57.1	Protein jagged-1a
NV2t011749002.1	https://simrbase.stowers.org/feature/Nematostella/vectensis/mRNA/NV2t011749002.1	NV2.11749	mRNA	Fibrinogen-related protein-29, partial	NvFREP-29	Matrisome associated	Secreted factors	N0.HOG0000928	OG0000046	Cnidaria specific	Cnidaria specific	Q9W332.3	Cubilin homolog
NV2t006245001.1	https://simrbase.stowers.org/feature/Nematostella/vectensis/mRNA/NV2t006245001.1	NV2.6245	mRNA	Fibrinogen-related protein-3	NvFREP-3	Matrisome associated	Secreted factors	N0.HOG0001236	OG0000189			P55918.2	Microfibril-associated glycoprotein 4
NV2t024006001.1	https://simrbase.stowers.org/feature/Nematostella/vectensis/mRNA/NV2t024006001.1	NV2.24006	Neurogenic locus notch homolog protein 1	Fibrinogen-related protein-4	NvFREP-4	Matrisome associated	Secreted factors	N0.HOG0001275	OG0000224			A2RUV0.2	Neurogenic locus notch homolog protein 1
NV2t017198001.1	https://simrbase.stowers.org/feature/Nematostella/vectensis/mRNA/NV2t017198001.1	NV2.17198	Derived by automated computational analysis using gene prediction method Gnomon	Fibrinogen-related protein-5	NvFREP-5	Matrisome associated	Secreted factors	N0.HOG0000026	OG0000000			D8VNS7.1	Ryncolin-1
NV2t024867001.1	https://simrbase.stowers.org/feature/Nematostella/vectensis/mRNA/NV2t024867001.1	NV2.24867	mRNA	Fibrinogen-related protein-6	NvFREP-6	Matrisome associated	Secreted factors	N0.HOG0001056	OG0000086			P0DMV4.1	Intelectin
NV2t014110001.1	https://simrbase.stowers.org/feature/Nematostella/vectensis/mRNA/NV2t014110001.1	NV2.14110	FBtr0473598	Fibrinogen-related protein-7	NvFREP-7	Matrisome associated	Secreted factors	N0.HOG0000001	OG0000000			O70165.1	Ficolin-1
NV2t024484001.1	https://simrbase.stowers.org/feature/Nematostella/vectensis/mRNA/NV2t024484001.1	NV2.24484	NV2t024484001.1	Fibrinogen-related protein-8	NvFREP-8	Matrisome associated	Secreted factors	N0.HOG0000026	OG0000000			Q95LU3.1	No description found
NV2t010046001.1	https://simrbase.stowers.org/feature/Nematostella/vectensis/mRNA/NV2t010046001.1	NV2.10046	Angiopoietin-related protein 7	Fibrinogen-related protein-9	NvFREP-9	Matrisome associated	Secreted factors	N0.HOG0000030	OG0000000			O43827.1	Angiopoietin-related protein 7
NV2t023832001.1	https://simrbase.stowers.org/feature/Nematostella/vectensis/mRNA/NV2t023832001.1	NV2.23832	follistatin	Follistatin	NvFst	Matrisome associated	Secreted factors	N0.HOG0000600	OG0000010			P47931.1	Follistatin
NV2t013423001.1	https://simrbase.stowers.org/feature/Nematostella/vectensis/mRNA/NV2t013423001.1	NV2.13423	notch receptor 1	Follistatin-like-1	NvFst-like 1	Matrisome associated	Secreted factors	N0.HOG0000597	OG0000010			O00468.6	Agrin	0.000159346	hit	-2.41309	1.44318e-06	0.332746	no hit	0.258594	0.209842	3.08559e-05	hit	-2.67168	6.62682e-07
NV2t023229001.1	https://simrbase.stowers.org/feature/Nematostella/vectensis/mRNA/NV2t023229001.1	NV2.23229	NV2t023229001.1	Follistatin-like-2	NvFst-like 2	Matrisome associated	Secreted factors	N0.HOG0000597	OG0000010			O00468.6	Agrin	0.000224712	hit	-2.10788	4.13544e-06	0.980781	no hit	0.0082011	0.966686	8.6109e-05	hit	-2.11609	4.0165e-06
NV2t023230001.1	https://simrbase.stowers.org/feature/Nematostella/vectensis/mRNA/NV2t023230001.1	NV2.23230	keratin associated protein 10-1	Follistatin-like-3	NvFst-like 3	Matrisome associated	Secreted factors	N0.HOG0000597	OG0000010			P82968.1	Four-domain proteases inhibitor	0.724476	no hit	0.106443	0.673696	0.272143	no hit	0.377943	0.159535	0.370311	no hit	-0.2715	0.297502
NV2t006489001.1	https://simrbase.stowers.org/feature/Nematostella/vectensis/mRNA/NV2t006489001.1	NV2.6489	growth differentiation factor 5	Growth/differentiation factor 5-like	NvGDF	Matrisome associated	Secreted factors	N0.HOG0000746	OG0000019			P85857.1	Growth/differentiation factor 6-A
NV2t010760001.1	https://simrbase.stowers.org/feature/Nematostella/vectensis/mRNA/NV2t010760001.1	NV2.10760	Indian hedgehog signaling molecule	Hedgehog1	NvHH1	Matrisome associated	Secreted factors	N0.HOG0000984	OG0000063			P97812.2	Indian hedgehog protein
NV2t023188001.1	https://simrbase.stowers.org/feature/Nematostella/vectensis/mRNA/NV2t023188001.1	NV2.23188	Indian hedgehog protein	Indian hedgehog protein-like	NvIhh	Matrisome associated	Secreted factors	N0.HOG0000985	OG0000063			Q91611.1	Desert hedgehog protein B
NV2t000173001.1	https://simrbase.stowers.org/feature/Nematostella/vectensis/mRNA/NV2t000173001.1	NV2.173	inhibin beta B chain	Inhibin beta B chain	NvInbb	Matrisome associated	Secreted factors	N0.HOG0000736	OG0000019			P27093.2	Inhibin beta B chain
NV2t019817001.1	https://simrbase.stowers.org/feature/Nematostella/vectensis/mRNA/NV2t019817001.1	NV2.19817	Protein jagged-1b	Jagged/Serrate-like	NvJag	Matrisome associated	Secreted factors	N0.HOG0000981	OG0000062			Q90Y54.1	Protein jagged-1b
NV2t003424001.1	https://simrbase.stowers.org/feature/Nematostella/vectensis/mRNA/NV2t003424001.1	NV2.3424	BMP binding endothelial regulator	Kielin/Chordin-like -1	NvKcp-like-1	Matrisome associated	Secreted factors	N0.HOG0002230	OG0001167	Cnidaria specific	Cnidaria specific	Q2TAL6.1	Brorin
NV2t012484002.1	https://simrbase.stowers.org/feature/Nematostella/vectensis/mRNA/NV2t012484002.1	NV2.12484	Kielin/chordin-like protein	Kielin/Chordin-like -2	NvKcp-like-2	Matrisome associated	Secreted factors	N0.HOG0001542	OG0000479			Q6ZWJ8.3	Kielin/chordin-like protein	0.0070105	hit	-1.27123	0.00240988	0.000619333	hit	-2.69954	1.53644e-05	0.00377301	hit	1.42831	0.00119708
NV2t012730001.1	https://simrbase.stowers.org/feature/Nematostella/vectensis/mRNA/NV2t012730001.1	NV2.12730	BMP binding endothelial regulator	Kielin/Chordin-like -3	NvKcp-like-3	Matrisome associated	Secreted factors	N0.HOG0000649	OG0000012			Q3U492.2	Kielin/chordin-like protein
NV2t020944001.1	https://simrbase.stowers.org/feature/Nematostella/vectensis/mRNA/NV2t020944001.1	NV2.20944	Fibrillin-1	Latent-transforming growth factor beta-binding protein 1-like	NvLTBP	Matrisome associated	Secreted factors	N0.HOG0000282	OG0000003			P98133.2	Fibrillin-1
NV2t013872001.1	https://simrbase.stowers.org/feature/Nematostella/vectensis/mRNA/NV2t013872001.1	NV2.13872	multiple EGF like domains 6	Multiple epidermal growth factor-like domains protein 10-like-3	NvPolyEGF-3	Matrisome associated	Secreted factors	N0.HOG0001029	OG0000076			O88281.1	Multiple epidermal growth factor-like domains protein 6	0.0275117	candidate	-0.696058	0.013634	0.035795	candidate	-0.748965	0.00954252	0.849563	no hit	0.052907	0.816624
NV2t014163001.1	https://simrbase.stowers.org/feature/Nematostella/vectensis/mRNA/NV2t014163001.1	NV2.14163	draper	Multiple epidermal growth factor-like domains protein 10-like-4	NvPolyEGF-4	Matrisome associated	Secreted factors	N0.HOG0000857	OG0000034	Cnidaria specific	Cnidaria specific	Q96KG7.1	Multiple epidermal growth factor-like domains protein 10
NV2t021926001.1	https://simrbase.stowers.org/feature/Nematostella/vectensis/mRNA/NV2t021926001.1	NV2.21926	multiple EGF like domains 8	Multiple epidermal growth factor-like domains protein 8-like	NvPolyEGF-21	Matrisome associated	Secreted factors	N0.HOG0000861	OG0000034	Cnidaria specific	Cnidaria specific	Q9QYP0.2	Multiple epidermal growth factor-like domains protein 8
NV2t021307001.1	https://simrbase.stowers.org/feature/Nematostella/vectensis/mRNA/NV2t021307001.1	NV2.21307	C-type lectin domain-containing protein	PAN/Apple domain-containing lectin protein-2	NvPALec-2	Matrisome associated	Secreted factors	N0.HOG0000243	OG0000003			Q5IS41.1	Neurocan core protein
NV2t021375001.1	https://simrbase.stowers.org/feature/Nematostella/vectensis/mRNA/NV2t021375001.1	NV2.21375	CD209 antigen-like protein A	PAN/Apple domain-containing lectin protein-3	NvPALec-3	Matrisome associated	Secreted factors	N0.HOG0000255	OG0000003			Q2LK54.1	Collectin-12
NV2t006411001.1	https://simrbase.stowers.org/feature/Nematostella/vectensis/mRNA/NV2t006411001.1	NV2.6411	Uromodulin	PAN/Apple domain-containing protein-1	NvPAN-1	Matrisome associated	Secreted factors	N0.HOG0000480	OG0000008			Q91X17.1	Uromodulin
NV2t007825001.1	https://simrbase.stowers.org/feature/Nematostella/vectensis/mRNA/NV2t007825001.1	NV2.7825	mRNA	PAN/Apple domain-containing protein-2	NvPAN-2	Matrisome associated	Secreted factors	N0.HOG0000928	OG0000046	Cnidaria specific	Cnidaria specific	P0DMV4.1	Intelectin
NV2t008000001.1	https://simrbase.stowers.org/feature/Nematostella/vectensis/mRNA/NV2t008000001.1	NV2.8000	Pancreatic secretory granule membrane major glycoprotein GP2	PAN/Apple domain-containing protein-3	NvPAN-3	Matrisome associated	Secreted factors	N0.HOG0000480	OG0000008			Q91X17.1	Uromodulin
NV2t014654001.1	https://simrbase.stowers.org/feature/Nematostella/vectensis/mRNA/NV2t014654001.1	NV2.14654	secreted frizzled related protein 5	Secreted frizzled-related protein	NvSFRP	Matrisome associated	Secreted factors	N0.HOG0001201	OG0000166			Q9IA96.1	Secreted frizzled-related protein 2
NV2t016600001.1	https://simrbase.stowers.org/feature/Nematostella/vectensis/mRNA/NV2t016600001.1	NV2.16600	somatomedin-B and thrombospondin type-1 domain-containing	Somatomedin-B and thrombospondin type-1 domain-containing protein	NvSOM-TSR	Matrisome associated	Secreted factors	N0.HOG0001188	OG0000158	Cnidaria specific	Cnidaria specific	Q32L50.2	Somatomedin-B and thrombospondin type-1 domain-containing protein	0.00582899	hit	-1.01748	0.00187414	0.240918	no hit	0.370744	0.135234	0.00120152	hit	-1.38823	0.000259174
NV2t022057001.1	https://simrbase.stowers.org/feature/Nematostella/vectensis/mRNA/NV2t022057001.1	NV2.22057	mRNA	Tumor necrosis factor	NvTNF	Matrisome associated	Secreted factors	N0.HOG0000890	OG0000038			Q9XT48.1	Lymphotoxin-alpha	0.000101632	hit	-2.77358	2.36515e-07	0.0193775	candidate	-0.686861	0.00405774	5.82925e-05	hit	-2.08672	2.09516e-06
NV2t002923001.1	https://simrbase.stowers.org/feature/Nematostella/vectensis/mRNA/NV2t002923001.1	NV2.2923	PDGF_2 domain-containing protein	Vascular endothelial growth factor-like	NvVEGF	Matrisome associated	Secreted factors	N0.HOG0001360	OG0000301			P97953.1	Vascular endothelial growth factor C
NV2t000914001.1	https://simrbase.stowers.org/feature/Nematostella/vectensis/mRNA/NV2t000914001.1	NV2.914	Apolipophorins	Vitellogenin-1	NvVgt-1	Matrisome associated	Secreted factors	N0.HOG0001138	OG0000129			Q9U943.2	Apolipophorins	0.585468	no hit	-0.150317	0.519149	0.00758355	hit	1.12741	0.000997871	0.00178859	hit	-1.27773	0.000447761
NV2t001922001.1	https://simrbase.stowers.org/feature/Nematostella/vectensis/mRNA/NV2t001922001.1	NV2.1922	hypothetical protein	Vitellogenin-2	NvVgt-2	Matrisome associated	Secreted factors	N0.HOG0001134	OG0000126			Q90508.2	Vitellogenin-1	0.000427124	hit	6.27945	2.66584e-05	0.000758802	hit	6.46731	2.15136e-05	0.838275	no hit	-0.187863	0.803277
NV2t000074001.1	https://simrbase.stowers.org/feature/Nematostella/vectensis/mRNA/NV2t000074001.1	NV2.74	Vitellogenin	Vitellogenin-like	NvVgt-like	Matrisome associated	Secreted factors	N0.HOG0001134	OG0000126			No hit	No hit	0.470099	no hit	-0.274305	0.397626	0.926005	no hit	-0.0453957	0.886077	0.549141	no hit	-0.22891	0.477161
NV2t012328001.1	https://simrbase.stowers.org/feature/Nematostella/vectensis/mRNA/NV2t012328001.1	NV2.12328	mRNA	vWFC domain-containing protein	NvvWFC	Matrisome associated	Secreted factors	N0.HOG0001542	OG0000479			Q80T14.2	Extracellular matrix organizing protein FRAS1
NV2t012225001.1	https://simrbase.stowers.org/feature/Nematostella/vectensis/mRNA/NV2t012225001.1	NV2.12225	Wnt family member 1	Wnt1	NvWnt1	Matrisome associated	Secreted factors	N0.HOG0000661	OG0000013			P24257.1	Protein Wnt-1
NV2t011032001.1	https://simrbase.stowers.org/feature/Nematostella/vectensis/mRNA/NV2t011032001.1	NV2.11032	FBtr0303207	Wnt10a	NvWnt10a	Matrisome associated	Secreted factors	N0.HOG0000672	OG0000013			P43446.1	Protein Wnt-10a
NV2t022664001.1	https://simrbase.stowers.org/feature/Nematostella/vectensis/mRNA/NV2t022664001.1	NV2.22664	Wnt family member 11	Wnt11	NvWnt11	Matrisome associated	Secreted factors	N0.HOG0000665	OG0000013			P47793.1	Protein Wnt-4a
NV2t002707001.1	https://simrbase.stowers.org/feature/Nematostella/vectensis/mRNA/NV2t002707001.1	NV2.2707	Wnt family member 16	Wnt16	NvWnt16	Matrisome associated	Secreted factors	N0.HOG0000657	OG0000013			Q5E9U6.1	Protein Wnt-16
NV2t003168001.1	https://simrbase.stowers.org/feature/Nematostella/vectensis/mRNA/NV2t003168001.1	NV2.3168	Protein Wnt-2b	Wnt2b	NvWnt2b	Matrisome associated	Secreted factors	N0.HOG0000668	OG0000013			Q93097.2	Protein Wnt-2b
NV2t012463001.1	https://simrbase.stowers.org/feature/Nematostella/vectensis/mRNA/NV2t012463001.1	NV2.12463	protein Wnt	Wnt3a	NvWnt3a	Matrisome associated	Secreted factors	N0.HOG0000662	OG0000013			Q2LMP1.1	Protein Wnt-3a
NV2t003611003.1	https://simrbase.stowers.org/feature/Nematostella/vectensis/mRNA/NV2t003611003.1	NV2.3611	Protein Wnt-5a	Wnt5a	NvWint5a	Matrisome associated	Secreted factors	N0.HOG0000665	OG0000013			P22725.2	Protein Wnt-5a
NV2t011033001.1	https://simrbase.stowers.org/feature/Nematostella/vectensis/mRNA/NV2t011033001.1	NV2.11033	Wnt family member 6	Wnt6	NvWnt6	Matrisome associated	Secreted factors	N0.HOG0000660	OG0000013			P22724.1	Protein Wnt-4
NV2t023407002.1	https://simrbase.stowers.org/feature/Nematostella/vectensis/mRNA/NV2t023407002.1	NV2.23407	Protein Wnt-7b	Wnt7b	NvWnt7b-3	Matrisome associated	Secreted factors	N0.HOG0000658	OG0000013	Cnidaria specific	Cnidaria specific	P28047.1	Protein Wnt-7b
NV2t003609001.1	https://simrbase.stowers.org/feature/Nematostella/vectensis/mRNA/NV2t003609001.1	NV2.3609	protein Wnt	Wnt7b	NvWnt7b-1	Matrisome associated	Secreted factors	N0.HOG0000667	OG0000013			Q3L254.1	Protein Wnt-7b
NV2t004522001.1	https://simrbase.stowers.org/feature/Nematostella/vectensis/mRNA/NV2t004522001.1	NV2.4522	protein Wnt	Wnt8a	NvWnt8a	Matrisome associated	Secreted factors	N0.HOG0000669	OG0000013			Q9H1J5.2	Protein Wnt-8a
NV2t003689003.1	https://simrbase.stowers.org/feature/Nematostella/vectensis/mRNA/NV2t003689003.1	NV2.3689	Protein Wnt-8b	Wnt8a-like	NvWnt8a-like	Matrisome associated	Secreted factors	N0.HOG0002237	OG0001174	Cnidaria specific	Cnidaria specific	P51029.1	Protein Wnt-8b
NV2t005661001.1	https://simrbase.stowers.org/feature/Nematostella/vectensis/mRNA/NV2t005661001.1	NV2.5661	protein Wnt	Wnt8b	NvWnt8b-2	Matrisome associated	Secreted factors	N0.HOG0000669	OG0000013			P51029.1	Protein Wnt-8b
NV2t021728001.1	https://simrbase.stowers.org/feature/Nematostella/vectensis/mRNA/NV2t021728001.1	NV2.21728	Contactin-3	Adhesin-like-1	NvAdh-like-1	Adhesome	Receptor proteins	N0.HOG0000092	OG0000001	Cnidaria specific	Cnidaria specific	Q9P232.3	Contactin-3
NV2t000570001.1	https://simrbase.stowers.org/feature/Nematostella/vectensis/mRNA/NV2t000570001.1	NV2.570	Protein sidekick-2	Adhesin-like-2	NvAdh-like-2	Adhesome	Receptor proteins	N0.HOG0000092	OG0000001	Cnidaria specific	Cnidaria specific	E1C8P7.2	Cell adhesion molecule DSCAML1
NV2t021788001.1	https://simrbase.stowers.org/feature/Nematostella/vectensis/mRNA/NV2t021788001.1	NV2.21788	Toll-like receptor 7	Adhesion GPCR-related-1	NvAdhGPCR-1	Adhesome	Receptor proteins	N0.HOG0001159	OG0000142	Cnidaria specific	Cnidaria specific	Q7KIN0.1	Toll-like receptor 7
NV2t001634001.1	https://simrbase.stowers.org/feature/Nematostella/vectensis/mRNA/NV2t001634001.1	NV2.1634	S-methylmethionine--homocysteine S-methyltransferase BHMT2	Adhesion GPCR-related-2	NvAdhGPCR-2	Adhesome	Receptor proteins	N0.HOG0000209	OG0000002	Cnidaria specific	Cnidaria specific	D3YXG0.1	Hemicentin-1
NV2t000502001.1	https://simrbase.stowers.org/feature/Nematostella/vectensis/mRNA/NV2t000502001.1	NV2.502	Tenascin	Adhesion GPCR-related-3	NvAdhGPCR-3	Adhesome	Receptor proteins	N0.HOG0001094	OG0000107			Q80YX1.1	Tenascin
NV2t000743001.1	https://simrbase.stowers.org/feature/Nematostella/vectensis/mRNA/NV2t000743001.1	NV2.743	Hemicentin-1	Adhesion GPCR-related-4	NvAdhGPCR-4	Adhesome	Receptor proteins	N0.HOG0000091	OG0000001	Cnidaria specific	Cnidaria specific	D3YXG0.1	Hemicentin-1
NV2t005700002.1	https://simrbase.stowers.org/feature/Nematostella/vectensis/mRNA/NV2t005700002.1	NV2.5700	anthrax toxin receptor	Anthrax toxin receptor 1-like-1	NvAntxR-1	Adhesome	Receptor proteins	N0.HOG0001333	OG0000278			Q6DFX2.1	Anthrax toxin receptor 2
NV2t008769001.1	https://simrbase.stowers.org/feature/Nematostella/vectensis/mRNA/NV2t008769001.1	NV2.8769	von Willebrand factor A domain-containing protein 2	Anthrax toxin receptor 1-like-2	NvAntxR-2	Adhesome	Receptor proteins	N0.HOG0000322	OG0000004	Cnidaria specific	Cnidaria specific	Q6DCQ6.1	von Willebrand factor A domain-containing protein 2	0.193252	candidate	-0.609972	0.140364	0.00165312	hit	-2.72212	8.5927e-05	0.00187877	hit	2.11215	0.000480897
NV2t008406003.1	https://simrbase.stowers.org/feature/Nematostella/vectensis/mRNA/NV2t008406003.1	NV2.8406	Collagen alpha-1(XIV) chain	Anthrax toxin receptor 1-like-3	NvAntxR-3	Adhesome	Receptor proteins	N0.HOG0000321	OG0000004	Cnidaria specific	Cnidaria specific	O35701.2	Matrilin-3	0.00222165	hit	2.5258	0.000490347	0.0128428	hit	-1.985	0.0021923	0.000129802	hit	4.5108	8.26521e-06
NV2t008980001.1	https://simrbase.stowers.org/feature/Nematostella/vectensis/mRNA/NV2t008980001.1	NV2.8980	Collagen alpha-1(XII) chain	Anthrax toxin receptor 1-like-4	NvAntxR-4	Adhesome	Receptor proteins	N0.HOG0000321	OG0000004	Cnidaria specific	Cnidaria specific	P13944.3	Collagen alpha-1(XII) chain	0.00178875	hit	1.88004	0.000347606	0.00295927	hit	-2.02119	0.000213832	5.59182e-05	hit	3.90123	1.80488e-06
NV2t021936001.1	https://simrbase.stowers.org/feature/Nematostella/vectensis/mRNA/NV2t021936001.1	NV2.21936	Coadhesin (Fragment)	Anthrax toxin receptor-like	NvAntxR-5	Adhesome	Receptor proteins	N0.HOG0000321	OG0000004	Cnidaria specific	Cnidaria specific	B3EWZ3.1	No description found
NV2t007757001.1	https://simrbase.stowers.org/feature/Nematostella/vectensis/mRNA/NV2t007757001.1	NV2.7757	Thyrotropin-releasing hormone receptor	Apextrin-like-1	NvApex-1	Adhesome	Receptor proteins	N0.HOG0001014	OG0000073			Q9Y5Y6.2	Suppressor of tumorigenicity 14 protein
NV2t000893001.1	https://simrbase.stowers.org/feature/Nematostella/vectensis/mRNA/NV2t000893001.1	NV2.893	Dorsal-ventral patterning tolloid-like protein 1	Apextrin-like-2	NvApex-2	Adhesome	Receptor proteins	N0.HOG0001014	OG0000073			O57460.1	Dorsal-ventral patterning tolloid-like protein 1
NV2t006315001.1	https://simrbase.stowers.org/feature/Nematostella/vectensis/mRNA/NV2t006315001.1	NV2.6315	Membrane frizzled-related protein	Apextrin-like-3	NvApex-3	Adhesome	Receptor proteins	N0.HOG0001014	OG0000073			Q60997.2	Scavenger receptor cysteine-rich domain-containing protein DMBT1
NV2t007641001.1	https://simrbase.stowers.org/feature/Nematostella/vectensis/mRNA/NV2t007641001.1	NV2.7641	Bone morphogenetic protein 1	Apextrin-like-4	NvApex-4	Adhesome	Receptor proteins	N0.HOG0001014	OG0000073			P98063.2	Bone morphogenetic protein 1
NV2t018302001.1	https://simrbase.stowers.org/feature/Nematostella/vectensis/mRNA/NV2t018302001.1	NV2.18302	attractin like 1	Attractin-like	NvAtrn	Adhesome	Receptor proteins	N0.HOG0000852	OG0000034			Q5VV63.2	Attractin-like protein 1
NV2t010733001.1	https://simrbase.stowers.org/feature/Nematostella/vectensis/mRNA/NV2t010733001.1	NV2.10733	Hemicentin-1	Brain-specific-angiogenesis-1-related	NvBai-1	Adhesome	Receptor proteins	N0.HOG0000199	OG0000002	Cnidaria specific	Cnidaria specific	D3YXG0.1	Hemicentin-1
NV2t005727001.1	https://simrbase.stowers.org/feature/Nematostella/vectensis/mRNA/NV2t005727001.1	NV2.5727	von Willebrand factor D and EGF domains	Cadherin and SEA domain-containing EGF-like repeat protein	NvCadSeaEGF	Adhesome	Receptor proteins	N0.HOG0000840	OG0000031			Q8N2E2.4	von Willebrand factor D and EGF domain-containing protein
NV2t004191001.1	https://simrbase.stowers.org/feature/Nematostella/vectensis/mRNA/NV2t004191001.1	NV2.4191	Cadherin EGF LAG seven-pass G-type receptor 2	Cadherin EGF LAG seven-pass G-type receptor-like-1	NvClsr-like-1	Adhesome	Receptor proteins	N0.HOG0000341	OG0000004	Cnidaria specific	Cnidaria specific	Q9R0M0.3	Cadherin EGF LAG seven-pass G-type receptor 2
NV2t008347001.1	https://simrbase.stowers.org/feature/Nematostella/vectensis/mRNA/NV2t008347001.1	NV2.8347	Protocadherin gamma-A2	Cadherin EGF LAG seven-pass G-type receptor-like-2	NvClsr-like-2	Adhesome	Receptor proteins	N0.HOG0000345	OG0000004	Cnidaria specific	Cnidaria specific	Q6V0I7.2	Protocadherin Fat 4
NV2t013293001.1	https://simrbase.stowers.org/feature/Nematostella/vectensis/mRNA/NV2t013293001.1	NV2.13293	EGF-containing fibulin-like extracellular matrix protein 1	Cadherin EGF LAG seven-pass G-type receptor-like-3	NvClsr-like-3	Adhesome	Receptor proteins	N0.HOG0000528	OG0000009	Cnidaria specific	Cnidaria specific	Q12805.2	EGF-containing fibulin-like extracellular matrix protein 1
NV2t004715001.1	https://simrbase.stowers.org/feature/Nematostella/vectensis/mRNA/NV2t004715001.1	NV2.4715	Protocadherin-like protein	Cadherin-1	NvCDH-1	Adhesome	Receptor proteins	N0.HOG0000336	OG0000004			B8V7Q1.1	Protocadherin-like protein	0.00072932	hit	-1.11434	7.83325e-05	0.017362	candidate	-0.617544	0.00346625	0.022192	no hit	-0.4968	0.0109322
NV2t011625002.1	https://simrbase.stowers.org/feature/Nematostella/vectensis/mRNA/NV2t011625002.1	NV2.11625	Protocadherin-like protein	Cadherin-2	NvCDH-2	Adhesome	Receptor proteins	N0.HOG0000336	OG0000004			B8V7Q1.1	Protocadherin-like protein
NV2t004921001.1	https://simrbase.stowers.org/feature/Nematostella/vectensis/mRNA/NV2t004921001.1	NV2.4921	FAT atypical cadherin 2	Cadherin-3	NvCDH-3	Adhesome	Receptor proteins	N0.HOG0000336	OG0000004			B8V7Q1.1	Protocadherin-like protein	0.000917253	hit	1.23052	0.000112873	0.135837	no hit	-0.38057	0.0616658	0.000192389	hit	1.6111	1.63989e-05
NV2t017446001.1	https://simrbase.stowers.org/feature/Nematostella/vectensis/mRNA/NV2t017446001.1	NV2.17446	domain-containing protein	CD34-related-1	NvCD34-1	Adhesome	Receptor proteins	N0.HOG0001294	OG0000242			No hit	No hit
NV2t017449001.1	https://simrbase.stowers.org/feature/Nematostella/vectensis/mRNA/NV2t017449001.1	NV2.17449	BRD4 interacting chromatin remodeling complex associated protein	CD34-related-2	NvCD34-2	Adhesome	Receptor proteins	N0.HOG0001650	OG0000587			No hit	No hit
NV2t016567001.1	https://simrbase.stowers.org/feature/Nematostella/vectensis/mRNA/NV2t016567001.1	NV2.16567	neurexin-3-like	Contactin-associated protein-like-1	NvCntcP-like-1	Adhesome	Receptor proteins	N0.HOG0000911	OG0000042	Cnidaria specific	Cnidaria specific	Q0V8T8.1	Contactin-associated protein like 5-2
NV2t004683002.1	https://simrbase.stowers.org/feature/Nematostella/vectensis/mRNA/NV2t004683002.1	NV2.4683	Contactin-associated protein-like 4	Contactin-associated protein-like-2	NvCntcP-like-2	Adhesome	Receptor proteins	N0.HOG0000822	OG0000029	Cnidaria specific	Cnidaria specific	Q99P47.2	Contactin-associated protein-like 4
NV2t004704001.1	https://simrbase.stowers.org/feature/Nematostella/vectensis/mRNA/NV2t004704001.1	NV2.4704	contactin associated protein	Contactin-associated protein-like-3	NvCntcP-like-3	Adhesome	Receptor proteins	N0.HOG0000821	OG0000029	Cnidaria specific	Cnidaria specific	P97846.1	Contactin-associated protein 1
NV2t000360001.1	https://simrbase.stowers.org/feature/Nematostella/vectensis/mRNA/NV2t000360001.1	NV2.360	contactin 1	Contactin-like	NvCntc-like	Adhesome	Receptor proteins	N0.HOG0000109	OG0000001			Q0E9H9.1	Cell adhesion molecule Dscam1	0.0465803	candidate	0.614497	0.0259727	0.698215	no hit	-0.127147	0.587657	0.0223215	candidate	0.741644	0.0110267
NV2t000137001.1	https://simrbase.stowers.org/feature/Nematostella/vectensis/mRNA/NV2t000137001.1	NV2.137	Copine-8	Copine-1	NvCpne-1	Adhesome	Receptor proteins	N0.HOG0000977	OG0000061			Q86YQ8.2	Copine-8	0.0054983	candidate	-0.845976	0.00170935	0.0208776	candidate	-0.715074	0.00449698	0.564746	no hit	-0.130902	0.493945
NV2t004625001.1	https://simrbase.stowers.org/feature/Nematostella/vectensis/mRNA/NV2t004625001.1	NV2.4625	copine 3	Copine-2	NvCpne-2	Adhesome	Receptor proteins	N0.HOG0000976	OG0000061			O75131.1	Copine-3	0.144941	no hit	0.418806	0.0995384	0.00530354	hit	-1.2397	0.000574315	0.000525074	hit	1.6585	8.0089e-05
NV2t021729001.1	https://simrbase.stowers.org/feature/Nematostella/vectensis/mRNA/NV2t021729001.1	NV2.21729	Protein sidekick-1	Cytokine receptor-like-1	NvCykR-1	Adhesome	Receptor proteins	N0.HOG0000092	OG0000001	Cnidaria specific	Cnidaria specific	Q58EX2.3	Protein sidekick-2
NV2t016931001.1	https://simrbase.stowers.org/feature/Nematostella/vectensis/mRNA/NV2t016931001.1	NV2.16931	contactin 4	Cytokine receptor-like-10, partial	NvCykR-10	Adhesome	Receptor proteins	N0.HOG0000074	OG0000001	Cnidaria specific	Cnidaria specific	Q58EX2.3	Protein sidekick-2
NV2t022551001.1	https://simrbase.stowers.org/feature/Nematostella/vectensis/mRNA/NV2t022551001.1	NV2.22551	interleukin 27 receptor subunit alpha	Cytokine receptor-like-11, partial	NvCykR-11	Adhesome	Receptor proteins	N0.HOG0000073	OG0000001	Cnidaria specific	Cnidaria specific	A7MBJ4.1	Receptor-type tyrosine-protein phosphatase F
NV2t012207001.1	https://simrbase.stowers.org/feature/Nematostella/vectensis/mRNA/NV2t012207001.1	NV2.12207	Neogenin (Fragment)	Cytokine receptor-like-12, partial	NvCykR-12	Adhesome	Receptor proteins	N0.HOG0000097	OG0000001	Cnidaria specific	Cnidaria specific	P97603.1	Neogenin
NV2t001800001.1	https://simrbase.stowers.org/feature/Nematostella/vectensis/mRNA/NV2t001800001.1	NV2.1800	Receptor-type tyrosine-protein phosphatase S	Cytokine receptor-like-13, partial	NvCykR-13	Adhesome	Receptor proteins	N0.HOG0002626	OG0001563	Cnidaria specific	Cnidaria specific	B0V2N1.1	Receptor-type tyrosine-protein phosphatase S
NV2t011900001.1	https://simrbase.stowers.org/feature/Nematostella/vectensis/mRNA/NV2t011900001.1	NV2.11900	Protein sidekick-2	Cytokine receptor-like-14, partial	NvCykR-14	Adhesome	Receptor proteins	N0.HOG0000081	OG0000001			Q92859.2	Neogenin
NV2t012582003.1	https://simrbase.stowers.org/feature/Nematostella/vectensis/mRNA/NV2t012582003.1	NV2.12582	contactin 5	Cytokine receptor-like-15, partial	NvCykR-15	Adhesome	Receptor proteins	N0.HOG0000071	OG0000001	Cnidaria specific	Cnidaria specific	A2A8L5.1	Receptor-type tyrosine-protein phosphatase F
NV2t003810001.1	https://simrbase.stowers.org/feature/Nematostella/vectensis/mRNA/NV2t003810001.1	NV2.3810	Protein sidekick-1	Cytokine receptor-like-2	NvCykR-2	Adhesome	Receptor proteins	N0.HOG0000088	OG0000001	Cnidaria specific	Cnidaria specific	Q7Z5N4.3	Protein sidekick-1
NV2t022951001.1	https://simrbase.stowers.org/feature/Nematostella/vectensis/mRNA/NV2t022951001.1	NV2.22951	Phosphatidylinositol phosphatase PTPRQ	Cytokine receptor-like-3	NvCykR-3	Adhesome	Receptor proteins	N0.HOG0000072	OG0000001	Cnidaria specific	Cnidaria specific	O88488.1	Phosphatidylinositol phosphatase PTPRQ
NV2t014182001.1	https://simrbase.stowers.org/feature/Nematostella/vectensis/mRNA/NV2t014182001.1	NV2.14182	mRNA	Cytokine receptor-like-4	NvCykR-4	Adhesome	Receptor proteins	N0.HOG0001760	OG0000697	Cnidaria specific	Cnidaria specific	O80713.1	Short-chain dehydrogenase reductase 3a
NV2t002940001.1	https://simrbase.stowers.org/feature/Nematostella/vectensis/mRNA/NV2t002940001.1	NV2.2940	mRNA	Cytokine receptor-like-5	NvCykR-5	Adhesome	Receptor proteins	N0.HOG0002627	OG0001564	Cnidaria specific	Cnidaria specific	Q2EY13.1	Protogenin B
NV2t003577001.1	https://simrbase.stowers.org/feature/Nematostella/vectensis/mRNA/NV2t003577001.1	NV2.3577	mRNA	Cytokine receptor-like-6	NvCykR-6	Adhesome	Receptor proteins	N0.HOG0003079	OG0002016			Q97Z97.1	Kelch domain-containing protein SSO1033
NV2t009493001.1	https://simrbase.stowers.org/feature/Nematostella/vectensis/mRNA/NV2t009493001.1	NV2.9493	Receptor-type tyrosine-protein phosphatase F	Cytokine receptor-like-7	NvCykR-7	Adhesome	Receptor proteins	N0.HOG0001340	OG0000284			Q64604.1	Receptor-type tyrosine-protein phosphatase F
NV2t010456001.1	https://simrbase.stowers.org/feature/Nematostella/vectensis/mRNA/NV2t010456001.1	NV2.10456	mRNA	Cytokine receptor-like-8	NvCykR-8	Adhesome	Receptor proteins					A2A8L5.1	Receptor-type tyrosine-protein phosphatase F
NV2t017701003.1	https://simrbase.stowers.org/feature/Nematostella/vectensis/mRNA/NV2t017701003.1	NV2.17701	Protein sidekick-2	Cytokine receptor-like-9, partial	NvCykR-9	Adhesome	Receptor proteins	N0.HOG0001911	OG0000848			A7MBJ4.1	Receptor-type tyrosine-protein phosphatase F
NV2t014222001.1	https://simrbase.stowers.org/feature/Nematostella/vectensis/mRNA/NV2t014222001.1	NV2.14222	Protogenin	DCC/Frazzled-like	NvFrazz	Adhesome	Receptor proteins	N0.HOG0000064	OG0000001			Q2VWP7.1	Protogenin
NV2t012653001.1	https://simrbase.stowers.org/feature/Nematostella/vectensis/mRNA/NV2t012653001.1	NV2.12653	Protein sidekick-1	Domeless-like cytokine receptor-1	NvDomCykR-1	Adhesome	Receptor proteins	N0.HOG0000072	OG0000001	Cnidaria specific	Cnidaria specific	Q8AV57.2	Protein sidekick-2
NV2t020188002.1	https://simrbase.stowers.org/feature/Nematostella/vectensis/mRNA/NV2t020188002.1	NV2.20188	Protein sidekick-1	Domeless-like cytokine receptor-2	NvDomCykR-2	Adhesome	Receptor proteins	N0.HOG0000072	OG0000001	Cnidaria specific	Cnidaria specific	P0C5E4.1	Phosphatidylinositol phosphatase PTPRQ
NV2t020819001.1	https://simrbase.stowers.org/feature/Nematostella/vectensis/mRNA/NV2t020819001.1	NV2.20819	Titin	Domeless-like cytokine receptor-3	NvDomCykR-3	Adhesome	Receptor proteins	N0.HOG0000072	OG0000001	Cnidaria specific	Cnidaria specific	O88488.1	Phosphatidylinositol phosphatase PTPRQ
NV2t023796001.1	https://simrbase.stowers.org/feature/Nematostella/vectensis/mRNA/NV2t023796001.1	NV2.23796	Protein sidekick-1	Domeless-like cytokine receptor-4	NvDomCykR-4	Adhesome	Receptor proteins	N0.HOG0000072	OG0000001	Cnidaria specific	Cnidaria specific	No hit	No hit
NV2t022950001.1	https://simrbase.stowers.org/feature/Nematostella/vectensis/mRNA/NV2t022950001.1	NV2.22950	protein tyrosine phosphatase receptor type Q	Domeless-like-1, partial	NvDom	Adhesome	Receptor proteins	N0.HOG0000074	OG0000001	Cnidaria specific	Cnidaria specific	Q8AV58.1	Protein sidekick-1
NV2t011373001.1	https://simrbase.stowers.org/feature/Nematostella/vectensis/mRNA/NV2t011373001.1	NV2.11373	Protein sidekick-2	Domeless-related receptor protein	NvDomR	Adhesome	Receptor proteins	N0.HOG0000072	OG0000001	Cnidaria specific	Cnidaria specific	Q6V4S5.1	Protein sidekick-2
NV2t022749001.1	https://simrbase.stowers.org/feature/Nematostella/vectensis/mRNA/NV2t022749001.1	NV2.22749	DS cell adhesion molecule like 1	Down syndrome cell adhesion molecule-like protein 1 homolog	NvDscaml	Adhesome	Receptor proteins	N0.HOG0000078	OG0000001			Q8TD84.2	Cell adhesion molecule DSCAML1
NV2t010370001.1	https://simrbase.stowers.org/feature/Nematostella/vectensis/mRNA/NV2t010370001.1	NV2.10370	Protocadherin Fat 3	EGF-like domain-containing protein-2	NvEGF-2	Adhesome	Receptor proteins	N0.HOG0000515	OG0000008			P10079.2	Fibropellin-1
NV2t003396003.1	https://simrbase.stowers.org/feature/Nematostella/vectensis/mRNA/NV2t003396003.1	NV2.3396	Adhesion G protein-coupled receptor E1	EGF-like repeat and discoidin domain-containing protein-2	NvPolyEGF-Disc-2	Adhesome	Receptor proteins	N0.HOG0000457	OG0000007			Q9TV36.1	Fibrillin-1
NV2t019905001.1	https://simrbase.stowers.org/feature/Nematostella/vectensis/mRNA/NV2t019905001.1	NV2.19905	Fibrillin-3	EGF-like repeat and discoidin domain-containing protein-5	NvPolyEGF-Disc-5	Adhesome	Receptor proteins	N0.HOG0000655	OG0000012			Q75N90.3	Fibrillin-3
NV2t024544001.1	https://simrbase.stowers.org/feature/Nematostella/vectensis/mRNA/NV2t024544001.1	NV2.24544	Protocadherin Fat 4	EGF-like repeat and discoidin domain-containing protein-6	NvPolyEGF-Disc-6	Adhesome	Receptor proteins	N0.HOG0002214	OG0001151	Cnidaria specific	Cnidaria specific	Q9IAT6.1	Delta-like protein C
NV2t024611001.1	https://simrbase.stowers.org/feature/Nematostella/vectensis/mRNA/NV2t024611001.1	NV2.24611	Protocadherin Fat 4	EGF-like repeat and discoidin domain-containing protein-7	NvPolyEGF-Disc-7	Adhesome	Receptor proteins	N0.HOG0001351	OG0000292			P10079.2	Fibropellin-1
NV2t012346001.1	https://simrbase.stowers.org/feature/Nematostella/vectensis/mRNA/NV2t012346001.1	NV2.12346	CD93 molecule	EGF-like repeat and hint domain-containing protein	NvPolyEGF-Hint	Adhesome	Receptor proteins	N0.HOG0001939	OG0000876	Cnidaria specific	Cnidaria specific	A2RUV0.2	Neurogenic locus notch homolog protein 1	0.18005	no hit	-0.561921	0.128612	0.907251	no hit	-0.0615703	0.857249	0.229852	no hit	-0.50035	0.169731
NV2t016090001.1	https://simrbase.stowers.org/feature/Nematostella/vectensis/mRNA/NV2t016090001.1	NV2.16090	Uncharacterized skeletal organic matrix protein 5	EGF-like repeat and PAN/Apple domain-containing protein	NvPolyEGF-PANApp	Adhesome	Receptor proteins	N0.HOG0001008	OG0000069	Cnidaria specific	Cnidaria specific	B8VIU6.1	Uncharacterized skeletal organic matrix protein 5
NV2t024533001.1	https://simrbase.stowers.org/feature/Nematostella/vectensis/mRNA/NV2t024533001.1	NV2.24533	EGF-containing fibulin-like extracellular matrix protein 1	EGF-like repeat protein-16	NvPolyEGF-16	Adhesome	Receptor proteins	N0.HOG0000442	OG0000007			O35568.1	EGF-containing fibulin-like extracellular matrix protein 1
NV2t005536001.1	https://simrbase.stowers.org/feature/Nematostella/vectensis/mRNA/NV2t005536001.1	NV2.5536	Sushi	EGF-like repeat protein-19,partial	NvPolyEGF-19	Adhesome	Receptor proteins	N0.HOG0000464	OG0000008			P49013.1	Fibropellin-3
NV2t013270001.1	https://simrbase.stowers.org/feature/Nematostella/vectensis/mRNA/NV2t013270001.1	NV2.13270	Ephrin type-B receptor 4	Ephrin receptor-like-1	NvEphr-like 1	Adhesome	Receptor proteins	N0.HOG0001141	OG0000131			P54761.2	Ephrin type-B receptor 4
NV2t019863002.1	https://simrbase.stowers.org/feature/Nematostella/vectensis/mRNA/NV2t019863002.1	NV2.19863	Ephrin type-A receptor 4	Ephrin receptor-like-2	NvEphr-like 2	Adhesome	Receptor proteins	N0.HOG0001141	OG0000131			Q03137.2	Ephrin type-A receptor 4
NV2t003227001.1	https://simrbase.stowers.org/feature/Nematostella/vectensis/mRNA/NV2t003227001.1	NV2.3227	Protocadherin Fat 4	FAT atypical cadherin	NvFAT	Adhesome	Receptor proteins	N0.HOG0000335	OG0000004			Q2PZL6.2	Protocadherin Fat 4
NV2t003144001.1	https://simrbase.stowers.org/feature/Nematostella/vectensis/mRNA/NV2t003144001.1	NV2.3144	neural-cadherin-like	FAT atypical cadherin-like	NvFat-like	Adhesome	Receptor proteins	N0.HOG0000337	OG0000004			Q14517.2	Protocadherin Fat 1	0.00531338	candidate	0.835865	0.00163408	0.07005	no hit	-0.495437	0.0245637	0.000509509	hit	1.3313	7.61608e-05
NV2t017172001.1	https://simrbase.stowers.org/feature/Nematostella/vectensis/mRNA/NV2t017172001.1	NV2.17172	Pro-epidermal growth factor	Fat-like cadherin-1	NvFatCad-1	Adhesome	Receptor proteins	N0.HOG0000350	OG0000004	Cnidaria specific	Cnidaria specific	Q95ND4.1	Pro-epidermal growth factor
NV2t004933001.1	https://simrbase.stowers.org/feature/Nematostella/vectensis/mRNA/NV2t004933001.1	NV2.4933	Derived by automated computational analysis using gene prediction method Gnomon	Fat-like cadherin-2	NvFatCad-2	Adhesome	Receptor proteins	N0.HOG0000336	OG0000004			B8V7Q1.1	Protocadherin-like protein	0.283605	no hit	0.224336	0.219781	0.135778	no hit	-0.366287	0.0615666	0.017321	candidate	0.590624	0.00807925
NV2t004783002.1	https://simrbase.stowers.org/feature/Nematostella/vectensis/mRNA/NV2t004783002.1	NV2.4783	Neurogenic locus notch homolog protein 2	Glycine-rich EGF-like repeat protein	NvEGF-repeat-35	Adhesome	Receptor proteins	N0.HOG0001007	OG0000069			P07207.3	Neurogenic locus Notch protein
NV2t025188001.1	https://simrbase.stowers.org/feature/Nematostella/vectensis/mRNA/NV2t025188001.1	NV2.25188	Sushi	Growth factor receptor-like-1, partial	NvGFR-1	Adhesome	Receptor proteins	N0.HOG0000883	OG0000036			Q66PY1.1	Signal peptide, CUB and EGF-like domain-containing protein 3
NV2t013801001.1	https://simrbase.stowers.org/feature/Nematostella/vectensis/mRNA/NV2t013801001.1	NV2.13801	Single insulin-like growth factor-binding domain protein-2	Growth factor receptor-like-2, partial	NvGFR-2	Adhesome	Receptor proteins	N0.HOG0000901	OG0000040			Q61581.3	Insulin-like growth factor-binding protein 7
NV2t017065001.1	https://simrbase.stowers.org/feature/Nematostella/vectensis/mRNA/NV2t017065001.1	NV2.17065	Probable oxidoreductase PXDNL	Ig and Sushi domain-containing protein	NvIgSushi	Adhesome	Receptor proteins	N0.HOG0000482	OG0000008	Cnidaria specific	Cnidaria specific	O89026.1	Roundabout homolog 1	0.000360977	hit	-1.75647	1.72567e-05	0.0216416	candidate	-0.746097	0.00471979	0.00272795	hit	-1.01037	0.000783327
NV2t021898001.1	https://simrbase.stowers.org/feature/Nematostella/vectensis/mRNA/NV2t021898001.1	NV2.21898	mRNA	Ig and Thyroglobulin type-1 domain-containing receptor protein	NvIg-Thyr	Adhesome	Receptor proteins	N0.HOG0002034	OG0000971			D3YYU8.1	No description found
NV2t000361004.1	https://simrbase.stowers.org/feature/Nematostella/vectensis/mRNA/NV2t000361004.1	NV2.361	Titin	IgCAM-like receptor protein-1	NvIgCam-1	Adhesome	Receptor proteins	N0.HOG0001407	OG0000346			A2ASS6.1	Titin	0.00100603	hit	1.40362	0.000136078	0.00241122	hit	-1.37643	0.000155716	3.75024e-05	hit	2.78005	8.96257e-07
NV2t014189001.1	https://simrbase.stowers.org/feature/Nematostella/vectensis/mRNA/NV2t014189001.1	NV2.14189	Contactin-3	IgCAM-like receptor protein-2	NvIgCam-2	Adhesome	Receptor proteins	N0.HOG0001340	OG0000284			P12960.1	Contactin-1
NV2t015289002.1	https://simrbase.stowers.org/feature/Nematostella/vectensis/mRNA/NV2t015289002.1	NV2.15289	mRNA	IgCAM-like receptor protein-3	NvIgCam-3	Adhesome	Receptor proteins	N0.HOG0002623	OG0001560	Cnidaria specific	Cnidaria specific	Q98902.1	Neural cell adhesion molecule L1
NV2t015862004.1	https://simrbase.stowers.org/feature/Nematostella/vectensis/mRNA/NV2t015862004.1	NV2.15862	mRNA	IgCAM-like receptor protein-4	NvIgCam-4	Adhesome	Receptor proteins	N0.HOG0002239	OG0001176	Cnidaria specific	Cnidaria specific	G4SLH0.2	No description found
NV2t021828001.1	https://simrbase.stowers.org/feature/Nematostella/vectensis/mRNA/NV2t021828001.1	NV2.21828	Hemicentin-2	IgCAM-like receptor protein-5	NvIgCam-5	Adhesome	Receptor proteins	N0.HOG0001393	OG0000332			A2AJ76.1	Hemicentin-2
NV2t021855001.1	https://simrbase.stowers.org/feature/Nematostella/vectensis/mRNA/NV2t021855001.1	NV2.21855	Protein turtle homolog B	IgCAM-like receptor protein-6	NvIgCam-6	Adhesome	Receptor proteins	N0.HOG0001780	OG0000717	Cnidaria specific	Cnidaria specific	D3ZB51.1	Protein turtle homolog B
NV2t021994005.1	https://simrbase.stowers.org/feature/Nematostella/vectensis/mRNA/NV2t021994005.1	NV2.21994	Neurotrimin	IgCAM-like receptor protein-7	NvIgCam-7	Adhesome	Receptor proteins	N0.HOG0001417	OG0000356	Cnidaria specific	Cnidaria specific	Q8HW98.2	IgLON family member 5
NV2t022319001.1	https://simrbase.stowers.org/feature/Nematostella/vectensis/mRNA/NV2t022319001.1	NV2.22319	mRNA	IgCAM-like receptor protein-8	NvIgCam-8	Adhesome	Receptor proteins					P36335.1	Neural cell adhesion molecule 1-B
NV2t022600001.1	https://simrbase.stowers.org/feature/Nematostella/vectensis/mRNA/NV2t022600001.1	NV2.22600	Down syndrome cell adhesion molecule-like protein Dscam2	IgCAM-like receptor protein-9	NvIgCam-9	Adhesome	Receptor proteins	N0.HOG0000577	OG0000010			Q96RW7.2	Hemicentin-1
NV2t021903002.1	https://simrbase.stowers.org/feature/Nematostella/vectensis/mRNA/NV2t021903002.1	NV2.21903	ZP domain-containing protein	IgCAM-like zona pellucida domain-containing receptor protein	NvIgCamZP	Adhesome	Receptor proteins	N0.HOG0000702	OG0000015	Cnidaria specific	Cnidaria specific	G8HTB6.1	ZP domain-containing protein	0.974435	no hit	0.00888146	0.968617	0.0389348	candidate	-0.722698	0.0108973	0.0210901	candidate	0.731579	0.0102607
NV2t022270001.1	https://simrbase.stowers.org/feature/Nematostella/vectensis/mRNA/NV2t022270001.1	NV2.22270	Netrin receptor DCC	IgCAM-related receptor protein-1	NvIgCam-related-1	Adhesome	Receptor proteins	N0.HOG0003095	OG0002032	Cnidaria specific	Cnidaria specific	Q8VHZ8.1	Cell adhesion molecule DSCAM
NV2t000325001.1	https://simrbase.stowers.org/feature/Nematostella/vectensis/mRNA/NV2t000325001.1	NV2.325	Contactin-2	IgCAM-related receptor protein-2	NvIgCam-related-2	Adhesome	Receptor proteins	N0.HOG0001490	OG0000427			Q8IWV2.1	Contactin-4
NV2t023604002.1	https://simrbase.stowers.org/feature/Nematostella/vectensis/mRNA/NV2t023604002.1	NV2.23604	Tyrosine-protein kinase receptor	Insulin-like growth-factor receptor-like	NvIGF	Adhesome	Receptor proteins	N0.HOG0003097	OG0002034	Cnidaria specific	Cnidaria specific	Q25197.1	Putative insulin-like peptide receptor
NV2t001171001.1	https://simrbase.stowers.org/feature/Nematostella/vectensis/mRNA/NV2t001171001.1	NV2.1171	Neuroglian	L1CAM/Neuroglian-like-1	NvL1Cam-1	Adhesome	Receptor proteins	N0.HOG0000057	OG0000001			B8VIW9.1	Fibronectin type III domain-containing protein	0.00280105	hit	1.60882	0.000676135	0.125088	candidate	-0.671912	0.0550482	0.000456639	hit	2.28073	6.36292e-05
NV2t000702005.1	https://simrbase.stowers.org/feature/Nematostella/vectensis/mRNA/NV2t000702005.1	NV2.702	Contactin-6	L1CAM/Neuroglian-like-2	NvL1Cam-2	Adhesome	Receptor proteins	N0.HOG0000060	OG0000001			Q9JMB8.2	Contactin-6
NV2t002571001.1	https://simrbase.stowers.org/feature/Nematostella/vectensis/mRNA/NV2t002571001.1	NV2.2571	Leucine-rich repeats and immunoglobulin-like domains protein 2	Leucine-rich repeat-containing G protein-coupled receptor-like-1	NvLeuGPCR-like-1	Adhesome	Receptor proteins	N0.HOG0001159	OG0000142	Cnidaria specific	Cnidaria specific	F1MT22.2	Leucine-rich repeat-containing G-protein coupled receptor 5
NV2t007502001.1	https://simrbase.stowers.org/feature/Nematostella/vectensis/mRNA/NV2t007502001.1	NV2.7502	Leucine-rich repeats and immunoglobulin-like domains protein 2	Leucine-rich repeat-containing G protein-coupled receptor-like-2	NvLeuGPCR-like-2	Adhesome	Receptor proteins	N0.HOG0001159	OG0000142	Cnidaria specific	Cnidaria specific	Q6P3Y9.3	Podocan-like protein 1
NV2t017941001.1	https://simrbase.stowers.org/feature/Nematostella/vectensis/mRNA/NV2t017941001.1	NV2.17941	Leucine-rich repeat-containing protein 15	Leucine-rich repeat-containing G protein-coupled receptor-like-3	NvLeuGPCR-like-3	Adhesome	Receptor proteins	N0.HOG0001159	OG0000142	Cnidaria specific	Cnidaria specific	Q27972.1	Chondroadherin
NV2t020131001.1	https://simrbase.stowers.org/feature/Nematostella/vectensis/mRNA/NV2t020131001.1	NV2.20131	Derived by automated computational analysis using gene prediction method Gnomon	Leucine-rich repeat-containing G protein-coupled receptor-like-4	NvLeuGPCR-like-4	Adhesome	Receptor proteins	N0.HOG0001159	OG0000142	Cnidaria specific	Cnidaria specific	O02833.1	Insulin-like growth factor-binding protein complex acid labile subunit
NV2t015921001.1	https://simrbase.stowers.org/feature/Nematostella/vectensis/mRNA/NV2t015921001.1	NV2.15921	Carboxypeptidase N subunit 2	Leucine-rich repeat-containing G protein-coupled receptor-like-5,partial	NvLeuGPCR-like-5	Adhesome	Receptor proteins	N0.HOG0001159	OG0000142	Cnidaria specific	Cnidaria specific	Q3UVD5.1	Leucine-rich repeat-containing G-protein coupled receptor 6
NV2t022026001.1	https://simrbase.stowers.org/feature/Nematostella/vectensis/mRNA/NV2t022026001.1	NV2.22026	uncharacterized protein	Leucine-rich repeat-containing G-protein coupled receptor-like-6	NvLeuGPCR-like-6	Adhesome	Receptor proteins	N0.HOG0001159	OG0000142	Cnidaria specific	Cnidaria specific	Q6P3Y9.3	Podocan-like protein 1
NV2t012452001.1	https://simrbase.stowers.org/feature/Nematostella/vectensis/mRNA/NV2t012452001.1	NV2.12452	Leucine-rich repeat-containing protein Bf66946	Leucine-rich repeat-containing protein Bf66946-like	NvLeu	Adhesome	Receptor proteins	N0.HOG0001463	OG0000400			C3YZ59.1	Leucine-rich repeat-containing protein Bf66946
NV2t024051001.1	https://simrbase.stowers.org/feature/Nematostella/vectensis/mRNA/NV2t024051001.1	NV2.24051	Leucine-rich repeats and immunoglobulin-like domains protein 3	Leucine-rich repeats and immunoglobulin-like domains protein-like-2	NvLeuIg-2	Adhesome	Receptor proteins	N0.HOG0001322	OG0000267			Q6P1C6.1	Leucine-rich repeats and immunoglobulin-like domains protein 3
NV2t012145001.1	https://simrbase.stowers.org/feature/Nematostella/vectensis/mRNA/NV2t012145001.1	NV2.12145	lipoprotein receptor-related protein	Low‐density Lipoprotein Receptor protein 1/2-like	NvLRP1/2	Adhesome	Receptor proteins	N0.HOG0000767	OG0000021			P98164.3	Low-density lipoprotein receptor-related protein 2	0.020293	candidate	0.601912	0.00934539	0.375708	no hit	-0.221403	0.24567	0.00482426	candidate	0.823315	0.00164923
NV2t014749001.1	https://simrbase.stowers.org/feature/Nematostella/vectensis/mRNA/NV2t014749001.1	NV2.14749	mRNA	Low-density lipoprotein receptor-related protein-like	NvLRP-like	Adhesome	Receptor proteins	N0.HOG0001481	OG0000418			Q9BY79.1	Membrane frizzled-related protein
NV2t000788001.1	https://simrbase.stowers.org/feature/Nematostella/vectensis/mRNA/NV2t000788001.1	NV2.788	low-density lipoprotein receptor-related protein	LRP-Polydom	NvLRP-Polydom	Adhesome	Receptor proteins	N0.HOG0000777	OG0000021			O75581.2	Low-density lipoprotein receptor-related protein 6
NV2t012165001.1	https://simrbase.stowers.org/feature/Nematostella/vectensis/mRNA/NV2t012165001.1	NV2.12165	macrophage mannose receptor 1-like	Macrophage mannose receptor-like-1	NvMmanR-1	Adhesome	Receptor proteins	N0.HOG0000242	OG0000003			Q61830.2	Macrophage mannose receptor 1	0.679812	no hit	-0.120447	0.622659	0.00504252	hit	-1.31245	0.000535685	0.00325339	hit	1.19201	0.000989166
NV2t009511001.1	https://simrbase.stowers.org/feature/Nematostella/vectensis/mRNA/NV2t009511001.1	NV2.9511	C-type mannose receptor 2	Macrophage mannose receptor-like-2	NvMmanR-2	Adhesome	Receptor proteins	N0.HOG0001045	OG0000082			Q9UBG0.2	C-type mannose receptor 2
NV2t012172001.1	https://simrbase.stowers.org/feature/Nematostella/vectensis/mRNA/NV2t012172001.1	NV2.12172	mannose receptor C-type 1	Macrophage mannose receptor-like-3	NvMmanR-3	Adhesome	Receptor proteins	N0.HOG0000242	OG0000003			P22897.1	Macrophage mannose receptor 1	0.405978	no hit	-0.147764	0.333719	0.000246213	hit	-1.72432	2.24849e-06	9.01536e-05	hit	1.57656	4.41915e-06
NV2t005949001.1	https://simrbase.stowers.org/feature/Nematostella/vectensis/mRNA/NV2t005949001.1	NV2.5949	Matrilin-2	MANSC domain-containing receptor protein-1	NvMANSCR-1	Adhesome	Receptor proteins	N0.HOG0001123	OG0000121	Cnidaria specific	Cnidaria specific	O00339.4	Matrilin-2
NV2t022155002.1	https://simrbase.stowers.org/feature/Nematostella/vectensis/mRNA/NV2t022155002.1	NV2.22155	Tolloid-like protein 1	MANSC domain-containing receptor protein-2	NvMANSCR-2	Adhesome	Receptor proteins	N0.HOG0001125	OG0000121			O43897.1	Tolloid-like protein 1
NV2t021158001.1	https://simrbase.stowers.org/feature/Nematostella/vectensis/mRNA/NV2t021158001.1	NV2.21158	Neural cell adhesion molecule 2	NCAM-1	NvNCAM-1	Adhesome	Receptor proteins	N0.HOG0001116	OG0000118			O35136.1	Neural cell adhesion molecule 2
NV2t021902003.1	https://simrbase.stowers.org/feature/Nematostella/vectensis/mRNA/NV2t021902003.1	NV2.21902	Hemicentin-1	NCAM-1-like	NvNCAM1-1	Adhesome	Receptor proteins	N0.HOG0001110	OG0000116			O15394.2	Neural cell adhesion molecule 2	0.0140002	candidate	0.680697	0.00592644	0.0308776	candidate	-0.645385	0.00783034	0.000570426	hit	1.32608	9.09359e-05
NV2t021211001.1	https://simrbase.stowers.org/feature/Nematostella/vectensis/mRNA/NV2t021211001.1	NV2.21211	immunoglobulin superfamily DCC subclass member 3	NCAM-2	NvNCAM-2	Adhesome	Receptor proteins	N0.HOG0001116	OG0000118			O35136.1	Neural cell adhesion molecule 2
NV2t021924001.1	https://simrbase.stowers.org/feature/Nematostella/vectensis/mRNA/NV2t021924001.1	NV2.21924	neural cell adhesion molecule	NCAM-6	NvNCAM-6	Adhesome	Receptor proteins	N0.HOG0001110	OG0000116			O15394.2	Neural cell adhesion molecule 2	0.0010666	hit	1.24761	0.000152041	0.000185132	hit	-2.54788	8.01912e-07	7.54877e-06	hit	3.79549	3.65595e-08
NV2t018115001.1	https://simrbase.stowers.org/feature/Nematostella/vectensis/mRNA/NV2t018115001.1	NV2.18115	contactin 4	NCAM-like-1	NvNCAM-like-1	Adhesome	Receptor proteins	N0.HOG0001407	OG0000346			Q8WZ42.4	Titin
NV2t020308001.1	https://simrbase.stowers.org/feature/Nematostella/vectensis/mRNA/NV2t020308001.1	NV2.20308	Contactin-6	NCAM-like-2	NvNCAM-like-2	Adhesome	Receptor proteins	N0.HOG0001417	OG0000356	Cnidaria specific	Cnidaria specific	O97394.2	Protein sidekick
NV2t021151002.1	https://simrbase.stowers.org/feature/Nematostella/vectensis/mRNA/NV2t021151002.1	NV2.21151	Neural cell adhesion molecule 2	NCAM-like-3	NvNCAM-like-3	Adhesome	Receptor proteins	N0.HOG0001116	OG0000118			O35136.1	Neural cell adhesion molecule 2	0.984447	no hit	0.00725919	0.980764	0.98937	no hit	0.00629959	0.983307	0.997653	no hit	0.000959601	0.997457
NV2t022495007.1	https://simrbase.stowers.org/feature/Nematostella/vectensis/mRNA/NV2t022495007.1	NV2.22495	Hemicentin-2	NCAM-related-1	NvNCAM-related-1	Adhesome	Receptor proteins	N0.HOG0001086	OG0000101			A2AJ76.1	Hemicentin-2	0.0810004	no hit	0.522195	0.0503641	0.0982706	no hit	-0.558109	0.0393574	0.00435916	hit	1.0803	0.00144047
NV2t022081001.1	https://simrbase.stowers.org/feature/Nematostella/vectensis/mRNA/NV2t022081001.1	NV2.22081	mRNA	NCAM-related-2	NvNCAM-related-2	Adhesome	Receptor proteins	N0.HOG0000583	OG0000010	Cnidaria specific	Cnidaria specific	Q96RW7.2	Hemicentin-1
NV2t025565001.1	https://simrbase.stowers.org/feature/Nematostella/vectensis/mRNA/NV2t025565001.1	NV2.25565	neogenin 1	NCAM-related-3	NvNCAM-related-3	Adhesome	Receptor proteins	N0.HOG0000578	OG0000010			P35331.1	Neuronal cell adhesion molecule
NV2t014588005.1	https://simrbase.stowers.org/feature/Nematostella/vectensis/mRNA/NV2t014588005.1	NV2.14588	unc-5 netrin receptor B	Netrin receptor UNC5	NvUNC5	Adhesome	Receptor proteins	N0.HOG0002238	OG0001175	Cnidaria specific	Cnidaria specific	Q7T2Z5.1	Netrin receptor UNC5C
NV2t011326001.1	https://simrbase.stowers.org/feature/Nematostella/vectensis/mRNA/NV2t011326001.1	NV2.11326	contactin associated protein family member 3	Neurexin	NvNrxn	Adhesome	Receptor proteins	N0.HOG0000823	OG0000029			B8UU78.1	No description found	0.74203	no hit	-0.110315	0.694072	0.00658935	hit	-1.41467	0.000807596	0.00411574	hit	1.30435	0.00133897
NV2t016569001.1	https://simrbase.stowers.org/feature/Nematostella/vectensis/mRNA/NV2t016569001.1	NV2.16569	Contactin associated protein like 2	Neurexin-like-1	NvNrxn-like-1	Adhesome	Receptor proteins	N0.HOG0000911	OG0000042	Cnidaria specific	Cnidaria specific	Q9CS84.3	Neurexin-1
NV2t017148001.1	https://simrbase.stowers.org/feature/Nematostella/vectensis/mRNA/NV2t017148001.1	NV2.17148	Neurexin-1	Neurexin-like-2	NvNrxn-like-2	Adhesome	Receptor proteins	N0.HOG0000911	OG0000042	Cnidaria specific	Cnidaria specific	D0PRN3.1	Neurexin-3
NV2t019653001.1	https://simrbase.stowers.org/feature/Nematostella/vectensis/mRNA/NV2t019653001.1	NV2.19653	Neurexin-1a	Neurexin-like-3	NvNrxn-like-3	Adhesome	Receptor proteins	N0.HOG0000910	OG0000042	Cnidaria specific	Cnidaria specific	Q9Y4C0.4	Neurexin-3
NV2t009601001.1	https://simrbase.stowers.org/feature/Nematostella/vectensis/mRNA/NV2t009601001.1	NV2.9601	EGF and laminin G domain-containing protein (Fragment)	Neurexin-like-4	NvNrxn-like-4	Adhesome	Receptor proteins	N0.HOG0000823	OG0000029			B8UU78.1	No description found	0.000449904	hit	1.40359	3.1092e-05	0.000823541	hit	-1.43422	2.6592e-05	1.31878e-05	hit	2.83781	1.53135e-07
NV2t017038001.1	https://simrbase.stowers.org/feature/Nematostella/vectensis/mRNA/NV2t017038001.1	NV2.17038	Neurexin-3b	Neurexin-like-5	NvNrxn-like-5	Adhesome	Receptor proteins	N0.HOG0000911	OG0000042	Cnidaria specific	Cnidaria specific	A1XQY1.1	Neurexin-3b
NV2t017107001.1	https://simrbase.stowers.org/feature/Nematostella/vectensis/mRNA/NV2t017107001.1	NV2.17107	Uncharacterized protein	Neurexin-like-6	NvNrxn-like-6	Adhesome	Receptor proteins	N0.HOG0000911	OG0000042	Cnidaria specific	Cnidaria specific	A1XQX2.1	Neurexin-1b
NV2t014795001.1	https://simrbase.stowers.org/feature/Nematostella/vectensis/mRNA/NV2t014795001.1	NV2.14795	Derived by automated computational analysis using gene prediction method Gnomon	Neuropilin and tolloid-like protein 1-like	NvNrpTol1l-like	Adhesome	Receptor proteins	N0.HOG0001758	OG0000695	Cnidaria specific	Cnidaria specific	O70244.2	Cubilin
NV2t006344001.1	https://simrbase.stowers.org/feature/Nematostella/vectensis/mRNA/NV2t006344001.1	NV2.6344	Bone morphogenetic protein 1 homolog	Neuropilin-related	NvNrp-related	Adhesome	Receptor proteins	N0.HOG0001462	OG0000399	Cnidaria specific	Cnidaria specific	P98069.1	Bone morphogenetic protein 1 homolog
NV2t002229001.1	https://simrbase.stowers.org/feature/Nematostella/vectensis/mRNA/NV2t002229001.1	NV2.2229	Cadherin 88C	NvHedgeling	NvHedgeling	Adhesome	Receptor proteins	N0.HOG0000317	OG0000004			Q6V0I7.2	Protocadherin Fat 4	0.000312102	hit	1.88251	1.24128e-05	0.000558689	hit	-1.86899	1.309e-05	9.3289e-06	hit	3.7515	6.44566e-08
NV2t024478001.1	https://simrbase.stowers.org/feature/Nematostella/vectensis/mRNA/NV2t024478001.1	NV2.24478	ZP domain-containing protein	Oncoprotein-induced transcript 3 protein-like-1	NvOIT3-1	Adhesome	Receptor proteins	N0.HOG0000706	OG0000015			G8HTB6.1	ZP domain-containing protein
NV2t025392001.1	https://simrbase.stowers.org/feature/Nematostella/vectensis/mRNA/NV2t025392001.1	NV2.25392	Oncoprotein-induced transcript 3 protein	Oncoprotein-induced transcript 3 protein-like-2	NvOIT3-2	Adhesome	Receptor proteins	N0.HOG0000706	OG0000015			Q29RU2.1	Oncoprotein-induced transcript 3 protein
NV2t025393001.1	https://simrbase.stowers.org/feature/Nematostella/vectensis/mRNA/NV2t025393001.1	NV2.25393	Oncoprotein-induced transcript 3 protein	Oncoprotein-induced transcript 3 protein-like-3	NvOIT3-3	Adhesome	Receptor proteins	N0.HOG0000480	OG0000008			Q29RU2.1	Oncoprotein-induced transcript 3 protein
NV2t011073001.1	https://simrbase.stowers.org/feature/Nematostella/vectensis/mRNA/NV2t011073001.1	NV2.11073	mRNA	PIN LabA-like domain-containing protein	NvPINLabA	Adhesome	Receptor proteins	N0.HOG0001664	OG0000601	Cnidaria specific	Cnidaria specific	O75445.3	Usherin
NV2t002812001.1	https://simrbase.stowers.org/feature/Nematostella/vectensis/mRNA/NV2t002812001.1	NV2.2812	Sema domain-containing protein	Plexin-like	NvPlxn	Adhesome	Receptor proteins					Q9HCM2.4	Plexin-A4
NV2t006892001.1	https://simrbase.stowers.org/feature/Nematostella/vectensis/mRNA/NV2t006892001.1	NV2.6892	Protein sidekick-1	Protein sidekick-1 homolog	NvSdk1	Adhesome	Receptor proteins	N0.HOG0000077	OG0000001			Q6V4S5.1	Protein sidekick-2
NV2t021328001.1	https://simrbase.stowers.org/feature/Nematostella/vectensis/mRNA/NV2t021328001.1	NV2.21328	FBtr0089271	Protein turtle homolog B	NvTlpB	Adhesome	Receptor proteins	N0.HOG0001320	OG0000265			Q9UPX0.2	Protein turtle homolog B
NV2t008636001.1	https://simrbase.stowers.org/feature/Nematostella/vectensis/mRNA/NV2t008636001.1	NV2.8636	tumor suppressor homolog	Protocadherin Fat 4-like-1	NvFATPCad4-like-1	Adhesome	Receptor proteins	N0.HOG0000345	OG0000004	Cnidaria specific	Cnidaria specific	Q9V5N8.4	Protocadherin-like wing polarity protein stan
NV2t023593001.1	https://simrbase.stowers.org/feature/Nematostella/vectensis/mRNA/NV2t023593001.1	NV2.23593	Protocadherin Fat 4	Protocadherin Fat 4-like-2	NvFATPCad4-like-2	Adhesome	Receptor proteins	N0.HOG0000351	OG0000004	Cnidaria specific	Cnidaria specific	Q2PZL6.2	Protocadherin Fat 4	0.000224712	hit	1.64583	3.99828e-06	0.000100854	hit	-2.60336	1.19142e-07	4.9149e-06	hit	4.24919	2.56521e-09
NV2t023594001.1	https://simrbase.stowers.org/feature/Nematostella/vectensis/mRNA/NV2t023594001.1	NV2.23594	Protocadherin Fat	Protocadherin Fat 4-like-3	NvFATPCad4-like-3	Adhesome	Receptor proteins	N0.HOG0000353	OG0000004	Cnidaria specific	Cnidaria specific	Q6V0I7.2	Protocadherin Fat 4	0.000361001	hit	2.15669	1.77693e-05	0.000371895	hit	-2.51838	5.63811e-06	8.02111e-06	hit	4.67508	4.89381e-08
NV2t004934001.1	https://simrbase.stowers.org/feature/Nematostella/vectensis/mRNA/NV2t004934001.1	NV2.4934	Neural-cadherin	Protocadherin-like protein, partial	NvPCad	Adhesome	Receptor proteins	N0.HOG0000327	OG0000004	Cnidaria specific	Cnidaria specific	O15943.2	Neural-cadherin
NV2t012583001.1	https://simrbase.stowers.org/feature/Nematostella/vectensis/mRNA/NV2t012583001.1	NV2.12583	Receptor-type tyrosine-protein phosphatase F	Receptor-type tyrosine-protein phosphatase F-like	NvPTypPF-like	Adhesome	Receptor proteins	N0.HOG0000072	OG0000001	Cnidaria specific	Cnidaria specific	P0C5E4.1	Phosphatidylinositol phosphatase PTPRQ
NV2t000601001.1	https://simrbase.stowers.org/feature/Nematostella/vectensis/mRNA/NV2t000601001.1	NV2.601	Receptor-type tyrosine-protein phosphatase delta	Receptor-type tyrosine-protein phosphatase-like	NvPTypP-like	Adhesome	Receptor proteins	N0.HOG0000051	OG0000001			P23468.2	Receptor-type tyrosine-protein phosphatase delta
NV2t011797001.1	https://simrbase.stowers.org/feature/Nematostella/vectensis/mRNA/NV2t011797001.1	NV2.11797	Receptor-type tyrosine-protein phosphatase F	Receptor-type tyrosine-protein phosphatase-related	NvPTypP-related	Adhesome	Receptor proteins	N0.HOG0000073	OG0000001	Cnidaria specific	Cnidaria specific	O75636.2	Ficolin-3
NV2t006768001.1	https://simrbase.stowers.org/feature/Nematostella/vectensis/mRNA/NV2t006768001.1	NV2.6768	Tyrosine-protein kinase transmembrane receptor ROR2	ROR2-like	NvROR2-like	Adhesome	Receptor proteins	N0.HOG0000617	OG0000011			Q01974.2	Tyrosine-protein kinase transmembrane receptor ROR2	0.00834177	candidate	-0.699982	0.00302695	0.000315865	hit	-1.863	3.84268e-06	0.000693058	hit	1.16302	0.000118084
NV2t021353001.1	https://simrbase.stowers.org/feature/Nematostella/vectensis/mRNA/NV2t021353001.1	NV2.21353	Roundabout homolog 2	Roundabout-like	NvRobo-like	Adhesome	Receptor proteins	N0.HOG0000575	OG0000010			Q7TPD3.2	Roundabout homolog 2	0.10646	no hit	0.396695	0.0694434	0.650594	no hit	-0.124843	0.527879	0.044451	no hit	0.521538	0.0249244
NV2t024984003.1	https://simrbase.stowers.org/feature/Nematostella/vectensis/mRNA/NV2t024984003.1	NV2.24984	Basement membrane-specific heparan sulfate proteoglycan core protein	Scavenger receptor class A-like	NvScaraA	Adhesome	Receptor proteins	N0.HOG0002640	OG0001577	Cnidaria specific	Cnidaria specific	Q05793.1	Basement membrane-specific heparan sulfate proteoglycan core protein
NV2t012749001.1	https://simrbase.stowers.org/feature/Nematostella/vectensis/mRNA/NV2t012749001.1	NV2.12749	deleted in malignant brain tumors 1	Scavenger receptor class I-like-1	NvScara1-like-1	Adhesome	Receptor proteins	N0.HOG0000727	OG0000018			Q95218.2	Scavenger receptor cysteine-rich domain-containing protein DMBT1
NV2t022574001.1	https://simrbase.stowers.org/feature/Nematostella/vectensis/mRNA/NV2t022574001.1	NV2.22574	deleted in malignant brain tumors 1	Scavenger receptor class I-like-2	NvScara1-like-2	Adhesome	Receptor proteins	N0.HOG0000727	OG0000018			Q95218.2	Scavenger receptor cysteine-rich domain-containing protein DMBT1
NV2t017488001.1	https://simrbase.stowers.org/feature/Nematostella/vectensis/mRNA/NV2t017488001.1	NV2.17488	deleted in malignant brain tumors 1	Scavenger receptor class I-like-3	NvScara1-like-3	Adhesome	Receptor proteins	N0.HOG0000727	OG0000018			F7J220.1	Scavenger receptor cysteine-rich domain superfamily protein
NV2t024169001.1	https://simrbase.stowers.org/feature/Nematostella/vectensis/mRNA/NV2t024169001.1	NV2.24169	Hemicentin-2	Scavenger receptor class I-like-4	NvScara1-like-4	Adhesome	Receptor proteins	N0.HOG0001196	OG0000161	Cnidaria specific	Cnidaria specific	A2AJ76.1	Hemicentin-2
NV2t006127001.1	https://simrbase.stowers.org/feature/Nematostella/vectensis/mRNA/NV2t006127001.1	NV2.6127	Cysteine-rich with egf-like	Scavenger receptor-like	NvScara-like	Adhesome	Receptor proteins	N0.HOG0000727	OG0000018			P98133.2	Fibrillin-1
NV2t014724001.1	https://simrbase.stowers.org/feature/Nematostella/vectensis/mRNA/NV2t014724001.1	NV2.14724	mRNA	Serine and threonine-rich receptor protein	NvSThrR	Adhesome	Receptor proteins	N0.HOG0001960	OG0000897	Cnidaria specific	Cnidaria specific	No hit	No hit
NV2t002939001.1	https://simrbase.stowers.org/feature/Nematostella/vectensis/mRNA/NV2t002939001.1	NV2.2939	mRNA	Similar expression to fibroblast growth factor (SEF)-like	NvSEF-like	Adhesome	Receptor proteins	N0.HOG0002627	OG0001564	Cnidaria specific	Cnidaria specific	P36335.1	Neural cell adhesion molecule 1-B
NV2t025143001.1	https://simrbase.stowers.org/feature/Nematostella/vectensis/mRNA/NV2t025143001.1	NV2.25143	Versican core protein	Snaclec-like-1	NvSnaclec-like-1	Adhesome	Receptor proteins	N0.HOG0000264	OG0000003	Cnidaria specific	Cnidaria specific	Q90953.1	Versican core protein
NV2t016213001.1	https://simrbase.stowers.org/feature/Nematostella/vectensis/mRNA/NV2t016213001.1	NV2.16213	Sortilin-related receptor	Sortilin-related receptor-like	NvSortR	Adhesome	Receptor proteins	N0.HOG0000728	OG0000018			Q95209.1	Sortilin-related receptor	0.269482	no hit	-0.231829	0.206927	0.0809435	no hit	-0.444654	0.0300889	0.311375	no hit	0.212825	0.242923
NV2t020657001.1	https://simrbase.stowers.org/feature/Nematostella/vectensis/mRNA/NV2t020657001.1	NV2.20657	Discoidin	Spermadhesin-like-1	NvSpadh-like-1	Adhesome	Receptor proteins	N0.HOG0001549	OG0000486	Cnidaria specific	Cnidaria specific	Q96PD2.1	Discoidin, CUB and LCCL domain-containing protein 2	0.0263399	candidate	-0.587992	0.0128821	0.98231	no hit	0.00725853	0.969545	0.0242276	candidate	-0.595251	0.0121448
NV2t003538001.1	https://simrbase.stowers.org/feature/Nematostella/vectensis/mRNA/NV2t003538001.1	NV2.3538	mRNA	Spermadhesin-like-2	NvSpadh-like-2	Adhesome	Receptor proteins	N0.HOG0002628	OG0001565	Cnidaria specific	Cnidaria specific	No hit	No hit
NV2t003539001.1	https://simrbase.stowers.org/feature/Nematostella/vectensis/mRNA/NV2t003539001.1	NV2.3539	mRNA	Spermadhesin-like-3	NvSpadh-like-3	Adhesome	Receptor proteins	N0.HOG0002628	OG0001565	Cnidaria specific	Cnidaria specific	Q5ADL8.1	No description found
NV2t014569001.1	https://simrbase.stowers.org/feature/Nematostella/vectensis/mRNA/NV2t014569001.1	NV2.14569	Tolloid-like protein 1	Spermadhesin-like-4	NvSpadh-like-4	Adhesome	Receptor proteins	N0.HOG0001945	OG0000882	Cnidaria specific	Cnidaria specific	Q62381.1	Tolloid-like protein 1
NV2t001696001.1	https://simrbase.stowers.org/feature/Nematostella/vectensis/mRNA/NV2t001696001.1	NV2.1696	stabilin 2	Stabilin 2-like	NvStab2	Adhesome	Receptor proteins	N0.HOG0001296	OG0000244			Q8WWQ8.3	Stabilin-2
NV2t014373001.1	https://simrbase.stowers.org/feature/Nematostella/vectensis/mRNA/NV2t014373001.1	NV2.14373	CUB domain-containing protein	Suppressor of lurcher protein-like-1	NvSOL-like-1	Adhesome	Receptor proteins	N0.HOG0000555	OG0000009	Cnidaria specific	Cnidaria specific	F1RWC3.3	Cubilin
NV2t016314001.1	https://simrbase.stowers.org/feature/Nematostella/vectensis/mRNA/NV2t016314001.1	NV2.16314	Seizure related 6 homolog	Suppressor of lurcher protein-like-10	NvSOL-like-10	Adhesome	Receptor proteins	N0.HOG0000553	OG0000009			O70244.2	Cubilin
NV2t016315001.1	https://simrbase.stowers.org/feature/Nematostella/vectensis/mRNA/NV2t016315001.1	NV2.16315	Bone morphogenetic protein 1	Suppressor of lurcher protein-like-11	NvSOL-like-11	Adhesome	Receptor proteins	N0.HOG0000553	OG0000009			Q9TU53.1	Cubilin
NV2t022311001.1	https://simrbase.stowers.org/feature/Nematostella/vectensis/mRNA/NV2t022311001.1	NV2.22311	Cubilin	Suppressor of lurcher protein-like-2	NvSOL-like-2	Adhesome	Receptor proteins	N0.HOG0002226	OG0001163	Cnidaria specific	Cnidaria specific	Q9JLB4.3	Cubilin
NV2t001288001.1	https://simrbase.stowers.org/feature/Nematostella/vectensis/mRNA/NV2t001288001.1	NV2.1288	Suppressor of lurcher protein 1	Suppressor of lurcher protein-like-3	NvSOL-like-3	Adhesome	Receptor proteins	N0.HOG0001065	OG0000092	Cnidaria specific	Cnidaria specific	P42664.2	Embryonic protein UVS.2	0.0136648	candidate	-0.905374	0.00574141	0.00957807	hit	-1.15571	0.00141785	0.404778	no hit	0.250333	0.331088
NV2t003066002.1	https://simrbase.stowers.org/feature/Nematostella/vectensis/mRNA/NV2t003066002.1	NV2.3066	CUB domain-containing protein 2	Suppressor of lurcher protein-like-4	NvSOL-like-4	Adhesome	Receptor proteins	N0.HOG0002236	OG0001173	Cnidaria specific	Cnidaria specific	Q8BQH6.2	CUB domain-containing protein 2
NV2t003167001.1	https://simrbase.stowers.org/feature/Nematostella/vectensis/mRNA/NV2t003167001.1	NV2.3167	Tolloid-like protein 1	Suppressor of lurcher protein-like-5	NvSOL-like-5	Adhesome	Receptor proteins	N0.HOG0000555	OG0000009	Cnidaria specific	Cnidaria specific	Q9DER7.1	Tolloid-like protein 1	0.10091	no hit	-0.373626	0.065366	0.0481466	no hit	-0.542258	0.0147691	0.436871	no hit	0.168632	0.363357
NV2t003169001.1	https://simrbase.stowers.org/feature/Nematostella/vectensis/mRNA/NV2t003169001.1	NV2.3169	procollagen C-endopeptidase enhancer	Suppressor of lurcher protein-like-6	NvSOL-like-6	Adhesome	Receptor proteins	N0.HOG0000542	OG0000009			O70244.2	Cubilin	0.153088	no hit	0.288159	0.106239	0.000417851	hit	-1.6159	7.58438e-06	5.9743e-05	hit	1.90406	2.21053e-06
NV2t003625001.1	https://simrbase.stowers.org/feature/Nematostella/vectensis/mRNA/NV2t003625001.1	NV2.3625	procollagen C-endopeptidase enhancer 2	Suppressor of lurcher protein-like-7	NvSOL-like-7	Adhesome	Receptor proteins	N0.HOG0000555	OG0000009	Cnidaria specific	Cnidaria specific	Q8JI28.1	Tolloid-like protein 1	0.467538	no hit	0.228397	0.395092	0.775812	no hit	-0.107455	0.683552	0.289165	no hit	0.335852	0.222977
NV2t003699001.1	https://simrbase.stowers.org/feature/Nematostella/vectensis/mRNA/NV2t003699001.1	NV2.3699	Tolloid-like protein 2	Suppressor of lurcher protein-like-8	NvSOL-like-8	Adhesome	Receptor proteins	N0.HOG0000555	OG0000009	Cnidaria specific	Cnidaria specific	Q62381.1	Tolloid-like protein 1
NV2t013356002.1	https://simrbase.stowers.org/feature/Nematostella/vectensis/mRNA/NV2t013356002.1	NV2.13356	Tolloid-like protein 2	Suppressor of lurcher protein-like-9	NvSOL-like-9	Adhesome	Receptor proteins	N0.HOG0001416	OG0000355	Cnidaria specific	Cnidaria specific	P97333.2	Neuropilin-1
NV2t001314001.1	https://simrbase.stowers.org/feature/Nematostella/vectensis/mRNA/NV2t001314001.1	NV2.1314	Hyalin (Fragment)	Sushi repeat-containing protein SRPX-like	NvSRPX-like	Adhesome	Receptor proteins	N0.HOG0002616	OG0001553	Cnidaria specific	Cnidaria specific	O96530.1	No description found
NV2t012863002.1	https://simrbase.stowers.org/feature/Nematostella/vectensis/mRNA/NV2t012863002.1	NV2.12863	zona pellucida glycoprotein 1	Sushi, EGF and ZP domain-containing receptor protein-1	NvSushiEGFZP-1	Adhesome	Receptor proteins	N0.HOG0000698	OG0000015	Cnidaria specific	Cnidaria specific	Q8WWZ8.2	Oncoprotein-induced transcript 3 protein	0.00126177	hit	2.1169	0.000199737	0.0111623	hit	-1.5034	0.00179775	8.76404e-05	hit	3.62029	4.17417e-06
NV2t012864001.1	https://simrbase.stowers.org/feature/Nematostella/vectensis/mRNA/NV2t012864001.1	NV2.12864	Oncoprotein-induced transcript 3 protein	Sushi, EGF and ZP domain-containing receptor protein-2	NvSushiEGFZP-2	Adhesome	Receptor proteins	N0.HOG0000698	OG0000015	Cnidaria specific	Cnidaria specific	Q8WWZ8.2	Oncoprotein-induced transcript 3 protein	0.00589044	hit	1.60426	0.00190181	0.00300991	hit	-2.24653	0.000221047	9.13402e-05	hit	3.85079	4.58973e-06
NV2t005822001.1	https://simrbase.stowers.org/feature/Nematostella/vectensis/mRNA/NV2t005822001.1	NV2.5822	zona pellucida sperm-binding protein	TGF-beta receptor type III-like	NvTGFbR	Adhesome	Receptor proteins	N0.HOG0000705	OG0000015	Cnidaria specific	Cnidaria specific	G8HTB6.1	ZP domain-containing protein	0.0524954	candidate	-0.699995	0.0298851	0.000814335	hit	-2.30461	2.48959e-05	0.00138533	hit	1.60462	0.000313274
NV2t008772001.1	https://simrbase.stowers.org/feature/Nematostella/vectensis/mRNA/NV2t008772001.1	NV2.8772	Thrombospondin-1	Thrombospondin type-1 and TLDc domain-containing protein	NvTSR-TLD	Adhesome	Receptor proteins	N0.HOG0003084	OG0002021	Cnidaria specific	Cnidaria specific	P35441.1	Thrombospondin-1
NV2t004066002.1	https://simrbase.stowers.org/feature/Nematostella/vectensis/mRNA/NV2t004066002.1	NV2.4066	Coadhesin (Fragment)	Thyroglobin, Thrombospondin type-1 and EGF-like domain repeat protein	NvThyr-TSR-EGF	Adhesome	Receptor proteins	N0.HOG0000199	OG0000002	Cnidaria specific	Cnidaria specific	B3EWZ3.1	No description found	0.00128419	hit	1.04759	0.00020455	0.000665393	hit	-1.48462	1.72931e-05	1.94412e-05	hit	2.5322	3.061e-07
NV2t021120001.1	https://simrbase.stowers.org/feature/Nematostella/vectensis/mRNA/NV2t021120001.1	NV2.21120	Coagulation factor V	TNF receptor-like	NvTNF-R	Adhesome	Receptor proteins	N0.HOG0000974	OG0000059			Q28107.1	Coagulation factor V
NV2t018776001.1	https://simrbase.stowers.org/feature/Nematostella/vectensis/mRNA/NV2t018776001.1	NV2.18776	mRNA	Thrombospondin type-1 and SEA domain-containing protein-1	NvTSR-SEA-1	Adhesome	Receptor proteins					No hit	No hit
NV2t019022001.1	https://simrbase.stowers.org/feature/Nematostella/vectensis/mRNA/NV2t019022001.1	NV2.19022	mRNA	Thrombospondin type-1 and SEA domain-containing protein-2	NvTSR-SEA-2	Adhesome	Receptor proteins	N0.HOG0002613	OG0001550	Cnidaria specific	Cnidaria specific	Q8CG65.2	SCO-spondin
NV2t024334001.1	https://simrbase.stowers.org/feature/Nematostella/vectensis/mRNA/NV2t024334001.1	NV2.24334	Mucin-like protein (Fragment)	Thrombospondin type-1 domain-containing protein-1	NvTSRd-1	Adhesome	Receptor proteins	N0.HOG0002217	OG0001154	Cnidaria specific	Cnidaria specific	P07996.2	Thrombospondin-1
NV2t018394001.1	https://simrbase.stowers.org/feature/Nematostella/vectensis/mRNA/NV2t018394001.1	NV2.18394	mRNA	Thrombospondin type-1 domain-containing protein-4	NvTSRd-4	Adhesome	Receptor proteins	N0.HOG0001364	OG0000303	Cnidaria specific	Cnidaria specific	Q2PC93.1	SCO-spondin
NV2t022114001.1	https://simrbase.stowers.org/feature/Nematostella/vectensis/mRNA/NV2t022114001.1	NV2.22114	mRNA	Thrombospondin type-1 domain-containing protein-5	NvTSRd-5	Adhesome	Receptor proteins	N0.HOG0002622	OG0001559	Cnidaria specific	Cnidaria specific	P35440.1	Thrombospondin-2
NV2t001784002.1	https://simrbase.stowers.org/feature/Nematostella/vectensis/mRNA/NV2t001784002.1	NV2.1784	Lactadherin	Thrombospondin type-1, Discoidin and EGF-like domain-containing protein	NvTSRDiscEGF	Adhesome	Receptor proteins	N0.HOG0003062	OG0001999	Cnidaria specific	Cnidaria specific	P10643.2	Complement component C7
NV2t012077002.1	https://simrbase.stowers.org/feature/Nematostella/vectensis/mRNA/NV2t012077002.1	NV2.12077	Tyrosine-protein kinase transmembrane receptor Ror2	Tyrosine-protein kinase transmembrane receptor Ror2-like	NvTyrRor2-like	Adhesome	Receptor proteins	N0.HOG0000617	OG0000011			Q9V6K3.2	Tyrosine-protein kinase transmembrane receptor Ror2
NV2t001025001.1	https://simrbase.stowers.org/feature/Nematostella/vectensis/mRNA/NV2t001025001.1	NV2.1025	low density lipoprotein receptor	Very low-density lipoprotein receptor-1	NvvLDL-1	Adhesome	Receptor proteins	N0.HOG0000765	OG0000021	Cnidaria specific	Cnidaria specific	P98155.1	Very low-density lipoprotein receptor
NV2t001337001.1	https://simrbase.stowers.org/feature/Nematostella/vectensis/mRNA/NV2t001337001.1	NV2.1337	FBtr0301470	Very low-density lipoprotein receptor-2	NvvLDL-2	Adhesome	Receptor proteins	N0.HOG0000764	OG0000021			Q8VI56.3	Low-density lipoprotein receptor-related protein 4
NV2t009849001.1	https://simrbase.stowers.org/feature/Nematostella/vectensis/mRNA/NV2t009849001.1	NV2.9849	Very low-density lipoprotein receptor	Very low-density lipoprotein receptor-3	NvvLDL-3	Adhesome	Receptor proteins	N0.HOG0000763	OG0000021	Cnidaria specific	Cnidaria specific	P98156.1	Very low-density lipoprotein receptor	0.0164739	candidate	0.700487	0.00723954	0.178266	no hit	0.37818	0.0893965	0.192149	no hit	0.322307	0.138146
NV2t012147001.1	https://simrbase.stowers.org/feature/Nematostella/vectensis/mRNA/NV2t012147001.1	NV2.12147	LDL receptor related protein 2	Vitellogenin receptor-like-1	NvVgtR-like-1	Adhesome	Receptor proteins	N0.HOG0000766	OG0000021			O75096.4	Low-density lipoprotein receptor-related protein 4	0.00577645	hit	1.26381	0.00184815	0.581949	no hit	0.219973	0.449151	0.0124751	hit	1.04384	0.00547274
NV2t018927001.1	https://simrbase.stowers.org/feature/Nematostella/vectensis/mRNA/NV2t018927001.1	NV2.18927	Low-density lipoprotein receptor-related protein 8	Vitellogenin receptor-like-2	NvVgtR-like-2	Adhesome	Receptor proteins	N0.HOG0000777	OG0000021			O75096.4	Low-density lipoprotein receptor-related protein 4
NV2t000628001.1	https://simrbase.stowers.org/feature/Nematostella/vectensis/mRNA/NV2t000628001.1	NV2.628	cache domain containing 1	von Willebrand factor A and cache domain-containing protein 1-1	NvvWFAc1-1	Adhesome	Receptor proteins	N0.HOG0000943	OG0000051			Q5VU97.2	VWFA and cache domain-containing protein 1
NV2t000903001.1	https://simrbase.stowers.org/feature/Nematostella/vectensis/mRNA/NV2t000903001.1	NV2.903	VWFA domain-containing protein	von Willebrand factor A and cache domain-containing protein 1-2	NvvWFAc1-2	Adhesome	Receptor proteins	N0.HOG0000943	OG0000051			Q6PDJ1.1	VWFA and cache domain-containing protein 1
NV2t001994001.1	https://simrbase.stowers.org/feature/Nematostella/vectensis/mRNA/NV2t001994001.1	NV2.1994	cache domain containing 1	von Willebrand factor A and cache domain-containing protein 1-3	NvvWFAc1-3	Adhesome	Receptor proteins	N0.HOG0000943	OG0000051			Q6PDJ1.1	VWFA and cache domain-containing protein 1	0.0552097	no hit	-0.490833	0.031817	0.0303563	candidate	0.669266	0.00765033	0.00128319	hit	-1.1601	0.000283105
NV2t011345001.1	https://simrbase.stowers.org/feature/Nematostella/vectensis/mRNA/NV2t011345001.1	NV2.11345	ZP domain-containing protein	WAP, Ig-like and Zona pellucida domain-containing receptor protein-1	NvWAPIgZP-1	Adhesome	Receptor proteins	N0.HOG0000706	OG0000015			G8HTB6.1	ZP domain-containing protein	0.000491134	hit	-1.79903	3.58594e-05	0.0154692	candidate	-0.921226	0.00291166	0.00937102	candidate	-0.8778	0.00382697
NV2t011632001.1	https://simrbase.stowers.org/feature/Nematostella/vectensis/mRNA/NV2t011632001.1	NV2.11632	ZP domain-containing protein	WAP, Ig-like and Zona pellucida domain-containing receptor protein-2	NvWAPIgZP-2	Adhesome	Receptor proteins	N0.HOG0000706	OG0000015			G8HTB6.1	ZP domain-containing protein	0.000224712	hit	-2.16292	3.49934e-06	0.0016148	hit	-1.40616	8.15255e-05	0.0101235	candidate	-0.756761	0.00421399
NV2t005824001.1	https://simrbase.stowers.org/feature/Nematostella/vectensis/mRNA/NV2t005824001.1	NV2.5824	tectorin beta	Zona pellucida sperm-binding protein-like-1	NvZP-1	Adhesome	Receptor proteins	N0.HOG0000705	OG0000015	Cnidaria specific	Cnidaria specific	G8HTB6.1	ZP domain-containing protein	0.000691258	hit	-1.60723	7.05053e-05	0.00244437	hit	-1.42982	0.000159301	0.504037	no hit	-0.177405	0.430926
NV2t011069001.1	https://simrbase.stowers.org/feature/Nematostella/vectensis/mRNA/NV2t011069001.1	NV2.11069	deleted in malignant brain tumors 1	Zona pellucida sperm-binding protein-like-2	NvZP-2	Adhesome	Receptor proteins	N0.HOG0000706	OG0000015			G8HTB6.1	ZP domain-containing protein	0.00026109	hit	-2.20197	7.14541e-06	0.201317	no hit	0.390235	0.105712	5.82925e-05	hit	-2.59221	2.09523e-06
NV2t021905001.1	https://simrbase.stowers.org/feature/Nematostella/vectensis/mRNA/NV2t021905001.1	NV2.21905	ZP domain-containing protein	Zona pellucida sperm-binding protein-like-3	NvZP-3	Adhesome	Receptor proteins	N0.HOG0000702	OG0000015	Cnidaria specific	Cnidaria specific	G8HTB6.1	ZP domain-containing protein
NV2t022367001.1	https://simrbase.stowers.org/feature/Nematostella/vectensis/mRNA/NV2t022367001.1	NV2.22367	mRNA	Zona pellucida sperm-binding protein-like-4	NvZP-4	Adhesome	Receptor proteins					P35054.1	Transforming growth factor beta receptor type 3
NV2t016661001.1	https://simrbase.stowers.org/feature/Nematostella/vectensis/mRNA/NV2t016661001.1	NV2.16661	mRNA	Balbiani ring protein 3-like-2	NvBr3-like-2	Adhesome	Receptor proteins	N0.HOG0001360	OG0000301			P49767.1	Vascular endothelial growth factor C
NV2t024355001.1	https://simrbase.stowers.org/feature/Nematostella/vectensis/mRNA/NV2t024355001.1	NV2.24355	72 kDa type IV collagenase	Fibronectin type II domain-containing protein-1	NvFnt-1	Adhesome	Receptor proteins	N0.HOG0000056	OG0000001	Cnidaria specific	Cnidaria specific	P33434.1	72 kDa type IV collagenase
NV2t022291001.1	https://simrbase.stowers.org/feature/Nematostella/vectensis/mRNA/NV2t022291001.1	NV2.22291	fibronectin type III domain containing 3B	Fibronectin type III domain containing 3B-like	NvFnt-3B-like	Adhesome	Receptor proteins	N0.HOG0001105	OG0000113			Q5RBN1.1	No description found	0.0022577	hit	1.13456	0.000501416	0.376654	no hit	-0.251806	0.246653	0.000741599	hit	1.38636	0.000130253
NV2t000988003.1	https://simrbase.stowers.org/feature/Nematostella/vectensis/mRNA/NV2t000988003.1	NV2.988	leucine rich repeats and immunoglobulin like domains 3	Leucine-rich repeats and immunoglobulin-like domains protein-like-1	NvLeuIg-1	Adhesome	Receptor proteins	N0.HOG0001248	OG0000201			Q6UXM1.1	Leucine-rich repeats and immunoglobulin-like domains protein 3
NV2t024145001.1	https://simrbase.stowers.org/feature/Nematostella/vectensis/mRNA/NV2t024145001.1	NV2.24145	Low-density lipoprotein receptor-related protein 2	Low-density lipoprotein receptor-related protein	NvLRPCub	Adhesome	Receptor proteins	N0.HOG0001365	OG0000304	Cnidaria specific	Cnidaria specific	P98157.1	Low-density lipoprotein receptor-related protein 1
NV2t006810001.1	https://simrbase.stowers.org/feature/Nematostella/vectensis/mRNA/NV2t006810001.1	NV2.6810	MAM and LDL-receptor class A domain-containing protein 2 (Fragment)	MAM and LDL-receptor class A domain-containing protein-like	NvMLR	Adhesome	Receptor proteins	N0.HOG0001126	OG0000122			B3EWZ6.1	MAM and LDL-receptor class A domain-containing protein 2
NV2t024348001.1	https://simrbase.stowers.org/feature/Nematostella/vectensis/mRNA/NV2t024348001.1	NV2.24348	zonadhesin	PA14 and fibronectin type II domain-containing protein	NvPFnt	Other	Adhesive proteins	N0.HOG0000056	OG0000001	Cnidaria specific	Cnidaria specific	No hit	No hit
NV2t000600001.1	https://simrbase.stowers.org/feature/Nematostella/vectensis/mRNA/NV2t000600001.1	NV2.600	Receptor-type tyrosine-protein phosphatase F	Phosphatidylinositol phosphatase PTPRQ-like-1	NvPtprq-1	Other	Adhesive proteins	N0.HOG0000075	OG0000001	Cnidaria specific	Cnidaria specific	P23468.2	Receptor-type tyrosine-protein phosphatase delta
NV2t000599002.1	https://simrbase.stowers.org/feature/Nematostella/vectensis/mRNA/NV2t000599002.1	NV2.599	Receptor-type tyrosine-protein phosphatase F	Phosphatidylinositol phosphatase PTPRQ-like-2	NvPtprq-2	Other	Adhesive proteins	N0.HOG0000081	OG0000001			A2A8L5.1	Receptor-type tyrosine-protein phosphatase F	0.00552673	candidate	-0.817645	0.00172146	0.0494698	no hit	-0.543434	0.0153309	0.217679	no hit	-0.274211	0.1595
NV2t012753001.1	https://simrbase.stowers.org/feature/Nematostella/vectensis/mRNA/NV2t012753001.1	NV2.12753	Deleted in malignant brain tumors 1 protein	Phosphatidylinositol phosphatase PTPRQ-like-3	NvPtprq-3	Other	Adhesive proteins	N0.HOG0000073	OG0000001	Cnidaria specific	Cnidaria specific	P0C5E4.1	Phosphatidylinositol phosphatase PTPRQ
NV2t013521001.1	https://simrbase.stowers.org/feature/Nematostella/vectensis/mRNA/NV2t013521001.1	NV2.13521	Potassium voltage-gated channel protein Shal	Phosphatidylinositol phosphatase PTPRQ-like-4	NvPtprq-4	Other	Adhesive proteins	N0.HOG0000091	OG0000001	Cnidaria specific	Cnidaria specific	Q16322.2	Potassium voltage-gated channel subfamily A member 10
NV2t023295001.1	https://simrbase.stowers.org/feature/Nematostella/vectensis/mRNA/NV2t023295001.1	NV2.23295	Coagulation factor VIII	Apical endosomal glycoprotein-related	NvAeGly-1	Other	Adhesive proteins	N0.HOG0000971	OG0000058			B3EWZ6.1	MAM and LDL-receptor class A domain-containing protein 2
NV2t025851002.1	https://simrbase.stowers.org/feature/Nematostella/vectensis/mRNA/NV2t025851002.1	NV2.25851	Hemicentin-1	Coadhesin-like-1	NvCAdh-like 1	Other	Adhesive proteins	N0.HOG0000193	OG0000002	Cnidaria specific	Cnidaria specific	D3YXG0.1	Hemicentin-1
NV2t001610003.1	https://simrbase.stowers.org/feature/Nematostella/vectensis/mRNA/NV2t001610003.1	NV2.1610	Collagen alpha-1(XII) chain	Coadhesin-like-2	NvCAdh-like 2	Other	Adhesive proteins	N0.HOG0000294	OG0000004	Cnidaria specific	Cnidaria specific	P70490.1	Lactadherin	0.000443763	hit	1.99548	3.0197e-05	0.00024195	hit	-2.85805	2.09605e-06	7.54877e-06	hit	4.85354	3.51661e-08
NV2t016479001.1	https://simrbase.stowers.org/feature/Nematostella/vectensis/mRNA/NV2t016479001.1	NV2.16479	Collagen alpha-4(VI) chain	Coadhesin-like-3	NvCAdh-like 3	Other	Adhesive proteins	N0.HOG0000311	OG0000004	Cnidaria specific	Cnidaria specific	A2AX52.2	Collagen alpha-4(VI) chain	0.189668	no hit	0.496855	0.137088	0.000408836	hit	-3.09169	7.18888e-06	6.1138e-05	hit	3.58854	2.34637e-06
NV2t012411001.1	https://simrbase.stowers.org/feature/Nematostella/vectensis/mRNA/NV2t012411001.1	NV2.12411	Collagen alpha-5(VI) chain	Coadhesin-like-4	NvCAdh-like 4	Other	Adhesive proteins	N0.HOG0000298	OG0000004	Cnidaria specific	Cnidaria specific	Q28178.2	Thrombospondin-1
NV2t021271002.1	https://simrbase.stowers.org/feature/Nematostella/vectensis/mRNA/NV2t021271002.1	NV2.21271	Contactin-associated protein-like 3B	Coadhesin-like-5	NvCAdh-like 5	Other	Adhesive proteins	N0.HOG0001342	OG0000285	Cnidaria specific	Cnidaria specific	Q28178.2	Thrombospondin-1
NV2t014808001.1	https://simrbase.stowers.org/feature/Nematostella/vectensis/mRNA/NV2t014808001.1	NV2.14808	Fibrillin-2	Crumbs-like-1	NvCrumbs-like-1	Other	Adhesive proteins					P98133.2	Fibrillin-1
NV2t006021001.1	https://simrbase.stowers.org/feature/Nematostella/vectensis/mRNA/NV2t006021001.1	NV2.6021	platelet endothelial aggregation receptor 1	Crumbs-like-2	NvCrumbs-like-2	Other	Adhesive proteins	N0.HOG0000491	OG0000008	Cnidaria specific	Cnidaria specific	P10079.2	Fibropellin-1	0.000401457	hit	2.27084	2.36567e-05	0.000860783	hit	-2.21626	2.82275e-05	1.2851e-05	hit	4.4871	1.36579e-07
NV2t006444001.1	https://simrbase.stowers.org/feature/Nematostella/vectensis/mRNA/NV2t006444001.1	NV2.6444	Neurogenic locus Notch protein	Crumbs-like-3	NvCrumbs-like-3	Other	Adhesive proteins	N0.HOG0000494	OG0000008	Cnidaria specific	Cnidaria specific	P07207.3	Neurogenic locus Notch protein
NV2t010727002.1	https://simrbase.stowers.org/feature/Nematostella/vectensis/mRNA/NV2t010727002.1	NV2.10727	Neurogenic locus Notch protein	Crumbs-like-4	NvCrumbs-like-4	Other	Adhesive proteins	N0.HOG0002631	OG0001568	Cnidaria specific	Cnidaria specific	O35516.2	Neurogenic locus notch homolog protein 2
NV2t011903001.1	https://simrbase.stowers.org/feature/Nematostella/vectensis/mRNA/NV2t011903001.1	NV2.11903	Notch receptor 1	Crumbs-like-5	NvCrumbs-like-5	Other	Adhesive proteins	N0.HOG0000480	OG0000008			P10079.2	Fibropellin-1	0.00023991	hit	2.72112	5.34046e-06	0.00016336	hit	-3.73362	4.82456e-07	4.9149e-06	hit	6.45474	6.77116e-09
NV2t019821001.1	https://simrbase.stowers.org/feature/Nematostella/vectensis/mRNA/NV2t019821001.1	NV2.19821	crumbs cell polarity complex component 1	Crumbs-like-6	NvCrumbs-like-6	Other	Adhesive proteins	N0.HOG0002636	OG0001573	Cnidaria specific	Cnidaria specific	P07207.3	Neurogenic locus Notch protein
NV2t002825001.1	https://simrbase.stowers.org/feature/Nematostella/vectensis/mRNA/NV2t002825001.1	NV2.2825	Fibrillin-1	Cubilin-like-1	NvCub-1	Other	Adhesive proteins	N0.HOG0000543	OG0000009			Q75N90.3	Fibrillin-3
NV2t003736001.1	https://simrbase.stowers.org/feature/Nematostella/vectensis/mRNA/NV2t003736001.1	NV2.3736	Fibrillin-3	Cubilin-like-2	NvCub-2	Other	Adhesive proteins	N0.HOG0000561	OG0000009	Cnidaria specific	Cnidaria specific	Q75N90.3	Fibrillin-3
NV2t003026001.1	https://simrbase.stowers.org/feature/Nematostella/vectensis/mRNA/NV2t003026001.1	NV2.3026	Si dkey-235d18.5	Cubilin-like-3	NvCub-3	Other	Adhesive proteins	N0.HOG0000543	OG0000009			P35555.4	Fibrillin-1
NV2t002814001.1	https://simrbase.stowers.org/feature/Nematostella/vectensis/mRNA/NV2t002814001.1	NV2.2814	zgc 154142	Cubilin-like-4	NvCub-4	Other	Adhesive proteins	N0.HOG0000555	OG0000009	Cnidaria specific	Cnidaria specific	O43897.1	Tolloid-like protein 1
NV2t005224001.1	https://simrbase.stowers.org/feature/Nematostella/vectensis/mRNA/NV2t005224001.1	NV2.5224	Cubilin	Cubilin-like-5	NvCub-5	Other	Adhesive proteins	N0.HOG0000555	OG0000009	Cnidaria specific	Cnidaria specific	O70244.2	Cubilin	0.00105329	hit	1.11839	0.000147209	0.00272401	hit	-1.08251	0.000184093	4.01481e-05	hit	2.2009	1.02721e-06
NV2t013183001.1	https://simrbase.stowers.org/feature/Nematostella/vectensis/mRNA/NV2t013183001.1	NV2.13183	Coagulation factor VIII	Cubilin-like-6	NvCub-6	Other	Adhesive proteins	N0.HOG0000974	OG0000059			Q4LDE5.3	Sushi, von Willebrand factor type A, EGF and pentraxin domain-containing protein 1	0.137867	no hit	-0.500998	0.0939691	0.00219023	hit	-1.80631	0.000134113	0.00361307	hit	1.30531	0.00113562
NV2t001272001.1	https://simrbase.stowers.org/feature/Nematostella/vectensis/mRNA/NV2t001272001.1	NV2.1272	mRNA	Hepatocyte growth factor activator-like	NvHgfA-like	Other	Adhesive proteins	N0.HOG0001194	OG0000160			Q6QNF4.1	Hepatocyte growth factor activator
NV2t016360001.1	https://simrbase.stowers.org/feature/Nematostella/vectensis/mRNA/NV2t016360001.1	NV2.16360	Fibronectin (Fragment)	Seminal plasma protein-like-1	NvSPP-like-1	Other	Adhesive proteins	N0.HOG0001662	OG0000599	Cnidaria specific	Cnidaria specific	P80964.2	Seminal plasma protein pB1
NV2t014010001.1	https://simrbase.stowers.org/feature/Nematostella/vectensis/mRNA/NV2t014010001.1	NV2.14010	mRNA	Seminal plasma protein-like-2	NvSPP-like-2	Other	Adhesive proteins	N0.HOG0001500	OG0000437	Cnidaria specific	Cnidaria specific	No hit	No hit	0.0025799	hit	1.87667	0.000604974	0.0626895	candidate	-0.982774	0.0210823	0.000288028	hit	2.85945	3.35588e-05
NV2t024359002.1	https://simrbase.stowers.org/feature/Nematostella/vectensis/mRNA/NV2t024359002.1	NV2.24359	Fibronectin	Seminal plasma protein-like-3	NvSPP-like-3	Other	Adhesive proteins	N0.HOG0000056	OG0000001	Cnidaria specific	Cnidaria specific	P11276.4	Fibronectin
NV2t005524014.1	https://simrbase.stowers.org/feature/Nematostella/vectensis/mRNA/NV2t005524014.1	NV2.5524	Protein scribble homolog	Scribble homolog	NvScrib	Other	Adhesive proteins	N0.HOG0000959	OG0000054			Q4H4B6.1	Protein scribble homolog	0.698129	no hit	0.0751438	0.643972	0.227661	no hit	-0.267963	0.125373	0.094287	no hit	0.343107	0.0598597
NV2t017096001.1	https://simrbase.stowers.org/feature/Nematostella/vectensis/mRNA/NV2t017096001.1	NV2.17096	Fibrinogen C domain-containing protein 1	Ryncolin-like 1	NvRyn1	Other	Putative Venoms	N0.HOG0000026	OG0000000			Q95LU3.1	No description found	0.00014814	hit	-2.63907	8.25923e-07	0.0509097	candidate	-0.587636	0.0159475	0.000101404	hit	-2.05144	5.56813e-06
NV2t004953001.1	https://simrbase.stowers.org/feature/Nematostella/vectensis/mRNA/NV2t004953001.1	NV2.4953	Angiopoietin-related protein 7	Ryncolin-like 4	NvRyn4	Other	Putative Venoms	N0.HOG0003080	OG0002017	Cnidaria specific	Cnidaria specific	Q8R1Q3.1	Angiopoietin-related protein 7
NV2t020322001.1	https://simrbase.stowers.org/feature/Nematostella/vectensis/mRNA/NV2t020322001.1	NV2.20322	ShTK domain protein	Nematocyst expressed protein 8-like	NvNep8	Other	Putative Venoms	N0.HOG0001128	OG0000122			O18733.2	Matrix metalloproteinase-9	0.0122428	hit	1.02097	0.00498243	0.00541052	hit	-1.45907	0.000591538	0.000178385	hit	2.48004	1.47515e-05
NV2t003951001.1	https://simrbase.stowers.org/feature/Nematostella/vectensis/mRNA/NV2t003951001.1	NV2.3951	Golgi-associated plant pathogenesis-related protein 1	CAPCL-like-1	NvCapcl-like-1	Other	Putative Venoms	N0.HOG0001140	OG0000130			P15941.3	Mucin-1
NV2t003157001.1	https://simrbase.stowers.org/feature/Nematostella/vectensis/mRNA/NV2t003157001.1	NV2.3157	Golgi-associated plant pathogenesis-related protein 1	CAPCL-like-2	NvCapcl-like-2	Other	Putative Venoms	N0.HOG0001140	OG0000130			Q9H4G4.3	Golgi-associated plant pathogenesis-related protein 1	0.0377285	no hit	-0.526236	0.0200936	0.0139837	candidate	-0.789292	0.00249443	0.247946	no hit	0.263056	0.185728
NV2t003941001.1	https://simrbase.stowers.org/feature/Nematostella/vectensis/mRNA/NV2t003941001.1	NV2.3941	Ficolin-1	Veficolin-1-like 1	NvVef1-1	Other	Putative Venoms	N0.HOG0000023	OG0000000	Cnidaria specific	Cnidaria specific	D8VNT0.1	Ryncolin-4
NV2t003719001.1	https://simrbase.stowers.org/feature/Nematostella/vectensis/mRNA/NV2t003719001.1	NV2.3719	Resistin-like beta	Veficolin-1-like 2	NvVef1-2	Other	Putative Venoms	N0.HOG0001958	OG0000895	Cnidaria specific	Cnidaria specific	C0HJP5.1	Collagen alpha-1(I) chain	0.0258147	hit	-1.2905	0.0125795	0.37092	no hit	0.508686	0.241949	0.00584078	hit	-1.79919	0.002112
NV2t004600001.1	https://simrbase.stowers.org/feature/Nematostella/vectensis/mRNA/NV2t004600001.1	NV2.4600	mRNA	Veficolin-1-like 3	NvVef1-3	Other	Putative Venoms	N0.HOG0001489	OG0000426			P18856.2	Collagen EMF1-alpha
NV2t008258002.1	https://simrbase.stowers.org/feature/Nematostella/vectensis/mRNA/NV2t008258002.1	NV2.8258	Collagen alpha-1(XII) chain	vWFA and ShKT domain-containing protein-1	NvvWFAShKT-1	Other	Putative Venoms	N0.HOG0002228	OG0001165	Cnidaria specific	Cnidaria specific	P13944.3	Collagen alpha-1(XII) chain
NV2t008260001.1	https://simrbase.stowers.org/feature/Nematostella/vectensis/mRNA/NV2t008260001.1	NV2.8260	collagen type XIV alpha 1 chain	vWFA and ShKT domain-containing protein-2	NvvWFAShKT-2	Other	Putative Venoms					No hit	No hit
NV2t014046001.1	https://simrbase.stowers.org/feature/Nematostella/vectensis/mRNA/NV2t014046001.1	NV2.14046	Collagen alpha-6(VI) chain	vWFA and Thyroglobin Type-1 repeat protein	NvvThy	Other	Putative Venoms	N0.HOG0000800	OG0000024			A2ASQ1.1	Agrin	0.000838153	hit	-1.61552	9.67036e-05	0.489141	no hit	0.22304	0.350363	0.000316637	hit	-1.83856	3.8637e-05
NV2t020323001.1	https://simrbase.stowers.org/feature/Nematostella/vectensis/mRNA/NV2t020323001.1	NV2.20323	Matrix metalloproteinase-9	Fibronectin type II and ShKT domain-containing protein	NvFnt-ShKT	Other	Putative Venoms	N0.HOG0000056	OG0000001	Cnidaria specific	Cnidaria specific	P41245.2	Matrix metalloproteinase-9
NV2t003375001.1	https://simrbase.stowers.org/feature/Nematostella/vectensis/mRNA/NV2t003375001.1	NV2.3375	Roundabout homolog 2	Hemolin-like-1	NvHml-like 1	Other	Putative Venoms	N0.HOG0000825	OG0000029			Q9HCK4.2	Roundabout homolog 2
NV2t005728003.1	https://simrbase.stowers.org/feature/Nematostella/vectensis/mRNA/NV2t005728003.1	NV2.5728	Hemicentin-1	Hemolin-like-2	NvHml-like 2	Other	Putative Venoms	N0.HOG0000581	OG0000010			Q3UQ28.2	Peroxidasin homolog	0.000427525	hit	-1.34765	2.70245e-05	0.0395061	no hit	-0.515694	0.0111463	0.00262277	candidate	-0.831951	0.000739186
NV2t000244001.1	https://simrbase.stowers.org/feature/Nematostella/vectensis/mRNA/NV2t000244001.1	NV2.244	Neurexin-4	Hemolin-like-3	NvHml-like 3	Other	Putative Venoms	N0.HOG0000825	OG0000029			Q94887.2	Neurexin-4	0.390055	no hit	0.200037	0.319076	0.103973	no hit	0.453277	0.0428074	0.281076	no hit	-0.253239	0.215579
NV2t023160001.1	https://simrbase.stowers.org/feature/Nematostella/vectensis/mRNA/NV2t023160001.1	NV2.23160	Pentraxin	Neuronal pentraxin-1-like	NvPNtx1	Other	Stress/Injury response proteins	N0.HOG0001150	OG0000137			Q62443.1	Neuronal pentraxin-1
NV2t023846001.1	https://simrbase.stowers.org/feature/Nematostella/vectensis/mRNA/NV2t023846001.1	NV2.23846	domain-containing protein	PI-PLC X domain-containing protein At5g67130	NvPIPlc	Other	Stress/Injury response proteins	N0.HOG0002581	OG0001518	Cnidaria specific	Cnidaria specific	Q6CEA4.1	Maintenance of telomere capping protein 6
NV2t024201001.1	https://simrbase.stowers.org/feature/Nematostella/vectensis/mRNA/NV2t024201001.1	NV2.24201	VWFA domain-containing protein	Prekallikrein/Factor XII-like	NvPk	Other	Stress/Injury response proteins	N0.HOG0000298	OG0000004	Cnidaria specific	Cnidaria specific	O00339.4	Matrilin-2
NV2t012183001.1	https://simrbase.stowers.org/feature/Nematostella/vectensis/mRNA/NV2t012183001.1	NV2.12183	nuclear pore complex protein Nup214	Uromodulin-like-1	NvUro-like-1	Other	Stress/Injury response proteins	N0.HOG0000706	OG0000015			No hit	No hit	0.000698684	hit	-1.53141	7.1946e-05	0.979019	no hit	0.00967709	0.963393	0.000478844	hit	-1.54109	6.88139e-05
NV2t023645001.1	https://simrbase.stowers.org/feature/Nematostella/vectensis/mRNA/NV2t023645001.1	NV2.23645	Oncoprotein-induced transcript 3 protein	Uromodulin-like-2	NvUro-like-2	Other	Stress/Injury response proteins	N0.HOG0000480	OG0000008			Q29RU2.1	Oncoprotein-induced transcript 3 protein
NV2t023765001.1	https://simrbase.stowers.org/feature/Nematostella/vectensis/mRNA/NV2t023765001.1	NV2.23765	Nidogen-2	TLDc domain-containing protein-1	NvTLDcP-1	Other	Stress/Injury response proteins	N0.HOG0000282	OG0000003			P35556.3	Fibrillin-2
NV2t006705001.1	https://simrbase.stowers.org/feature/Nematostella/vectensis/mRNA/NV2t006705001.1	NV2.6705	Roundabout homolog 1	TLDc domain-containing protein-2	NvTLDcP-2	Other	Stress/Injury response proteins	N0.HOG0001092	OG0000105	Cnidaria specific	Cnidaria specific	O89026.1	Roundabout homolog 1	0.00014814	hit	-3.0946	8.85229e-07	0.542905	no hit	-0.199985	0.406146	5.26116e-05	hit	-2.89462	1.47413e-06
NV2t014920001.1	https://simrbase.stowers.org/feature/Nematostella/vectensis/mRNA/NV2t014920001.1	NV2.14920	A disintegrin and metalloproteinase with thrombospondin motifs 10	TLDc domain-containing protein-3	NvTLDcP-3	Other	Stress/Injury response proteins	N0.HOG0001092	OG0000105	Cnidaria specific	Cnidaria specific	Q9H324.2	A disintegrin and metalloproteinase with thrombospondin motifs 10
NV2t014921001.1	https://simrbase.stowers.org/feature/Nematostella/vectensis/mRNA/NV2t014921001.1	NV2.14921	A disintegrin and metalloproteinase with thrombospondin motifs 10	TLDc domain-containing protein-4	NvTLDcP-4	Other	Stress/Injury response proteins	N0.HOG0001092	OG0000105	Cnidaria specific	Cnidaria specific	Q9H324.2	A disintegrin and metalloproteinase with thrombospondin motifs 10	0.00326612	hit	-1.62255	0.000842925	0.000221563	hit	-4.02665	1.3087e-06	0.000439042	hit	2.40409	5.94804e-05
NV2t004979001.1	https://simrbase.stowers.org/feature/Nematostella/vectensis/mRNA/NV2t004979001.1	NV2.4979	Derived by automated computational analysis using gene prediction method Gnomon	Polycystin 1-like-1	NvPkd1-like-1	Other	Ion channels	N0.HOG0000810	OG0000027			Q7TN88.1	Polycystin-1-like protein 2
NV2t020778001.1	https://simrbase.stowers.org/feature/Nematostella/vectensis/mRNA/NV2t020778001.1	NV2.20778	polycystic kidney disease protein 1-like 2	Polycystin 1-like-2	NvPkd1-like-2	Other	Ion channels	N0.HOG0000811	OG0000027			Q7TN88.1	Polycystin-1-like protein 2
NV2t018257001.1	https://simrbase.stowers.org/feature/Nematostella/vectensis/mRNA/NV2t018257001.1	NV2.18257	Lactadherin	Polycystin-like, partial	NvPkd-like	Other	Ion channels	N0.HOG0000811	OG0000027			P70490.1	Lactadherin
NV2t010225001.1	https://simrbase.stowers.org/feature/Nematostella/vectensis/mRNA/NV2t010225001.1	NV2.10225	Short transient receptor potential channel 2	Short TRP channel-like	NvTRP	Other	Ion channels	N0.HOG0001953	OG0000890	Cnidaria specific	Cnidaria specific	Q9R283.2	Short transient receptor potential channel 2	0.00134706	hit	1.30872	0.000221196	0.00979737	candidate	-0.975336	0.00147182	8.6109e-05	hit	2.28405	4.01203e-06
NV2t016117001.1	https://simrbase.stowers.org/feature/Nematostella/vectensis/mRNA/NV2t016117001.1	NV2.16117	voltage-dependent calcium channel subunit	Voltage-dependent calcium channel subuni alpha-2/delta-1-related	NvVgccA2-1	Other	Ion channels	N0.HOG0000944	OG0000051			Q9Z1L5.1	Voltage-dependent calcium channel subunit alpha-2/delta-3	0.0163001	candidate	0.707673	0.0071375	0.00207157	hit	-1.36871	0.000122361	0.000107426	hit	2.07638	6.00454e-06
NV2t003042004.1	https://simrbase.stowers.org/feature/Nematostella/vectensis/mRNA/NV2t003042004.1	NV2.3042	Voltage-dependent calcium channel subunit alpha-2/delta-4	Voltage-dependent calcium channel subuni alpha-2/delta-4-related	NvVgccA2-2	Other	Ion channels	N0.HOG0000946	OG0000051			Q5RJF7.1	Voltage-dependent calcium channel subunit alpha-2/delta-4
NV2t021289001.1	https://simrbase.stowers.org/feature/Nematostella/vectensis/mRNA/NV2t021289001.1	NV2.21289	mRNA	Thrombospondin type-1 domain-containing protein-2	NvTSRd-2	Other	Uncharacterized ECM domain-containing proteins	N0.HOG0003093	OG0002030	Cnidaria specific	Cnidaria specific	Q8CG65.2	SCO-spondin
NV2t021872001.1	https://simrbase.stowers.org/feature/Nematostella/vectensis/mRNA/NV2t021872001.1	NV2.21872	vascular endothelial growth factor c	Balbiani ring protein 3-like-1	NvBr3-like-1	Other	Uncharacterized ECM domain-containing proteins	N0.HOG0001360	OG0000301			Q03376.1	Balbiani ring protein 3	0.000917253	hit	-1.44942	0.000112757	0.253872	no hit	0.333373	0.144806	0.000249398	hit	-1.78279	2.5841e-05
NV2t016585001.1	https://simrbase.stowers.org/feature/Nematostella/vectensis/mRNA/NV2t016585001.1	NV2.16585	Secretory phospholipase A2 receptor	Fibronectin Type II domain-containing protein-3	NvFnt-3	Other	Uncharacterized ECM domain-containing proteins	N0.HOG0001195	OG0000160	Cnidaria specific	Cnidaria specific	Q90611.1	72 kDa type IV collagenase
NV2t019078001.1	https://simrbase.stowers.org/feature/Nematostella/vectensis/mRNA/NV2t019078001.1	NV2.19078	Receptor-type tyrosine-protein phosphatase S	Fibronectin type III and SEA domain-containing protein	NvFnt-SEA2	Other	Uncharacterized ECM domain-containing proteins	N0.HOG0000051	OG0000001			Q4VA61.2	Cell adhesion molecule DSCAML1
NV2t012498002.1	https://simrbase.stowers.org/feature/Nematostella/vectensis/mRNA/NV2t012498002.1	NV2.12498	mRNA	Fibronectin type III domain-containing protein-2	NvFnt-2	Other	Uncharacterized ECM domain-containing proteins					No hit	No hit
NV2t023270001.1	https://simrbase.stowers.org/feature/Nematostella/vectensis/mRNA/NV2t023270001.1	NV2.23270	Adhesion G-protein coupled receptor V1	Fibronectin type-III and CalX domain-containing protein	NvFnt-CalX	Other	Uncharacterized ECM domain-containing proteins	N0.HOG0000892	OG0000039			No hit	No hit	0.0114322	candidate	-0.755213	0.00455917	0.165326	no hit	-0.386082	0.0811057	0.136663	no hit	-0.36913	0.0928479
NV2t024045001.1	https://simrbase.stowers.org/feature/Nematostella/vectensis/mRNA/NV2t024045001.1	NV2.24045	Frizzled-2 (Fragment)	Frizzled and CUB domain-containing protein-1	NvFrzCub-1	Other	Uncharacterized ECM domain-containing proteins	N0.HOG0001491	OG0000428			Q9IA06.1	Frizzled-2
NV2t024249001.1	https://simrbase.stowers.org/feature/Nematostella/vectensis/mRNA/NV2t024249001.1	NV2.24249	Protein mom-5	Frizzled and CUB domain-containing protein-2	NvFrzCub-2	Other	Uncharacterized ECM domain-containing proteins	N0.HOG0001201	OG0000166			A0A0K3AWM6.1	Protein mom-5
NV2t000890002.1	https://simrbase.stowers.org/feature/Nematostella/vectensis/mRNA/NV2t000890002.1	NV2.890	leucine rich repeat containing 40	SHOC2 leucine rich repeat scaffold protein-like	NvShoc2	Other	Uncharacterized ECM domain-containing proteins	N0.HOG0001119	OG0000119			Q5ZLN0.1	No description found	0.708831	no hit	0.0977003	0.656487	0.0225628	candidate	0.812127	0.00500654	0.0202734	candidate	-0.714426	0.00975965
NV2t002146001.1	https://simrbase.stowers.org/feature/Nematostella/vectensis/mRNA/NV2t002146001.1	NV2.2146	von Willebrand factor A domain containing 7	Heterokaryon incompatibility protein Het-C-like	NvHetC-like	Other	Uncharacterized ECM domain-containing proteins	N0.HOG0000182	OG0000002	Cnidaria specific	Cnidaria specific	D3YXG0.1	Hemicentin-1	0.0220986	candidate	-0.701527	0.0103901	0.212064	no hit	0.374081	0.113407	0.00310775	hit	-1.07561	0.00093153
NV2t003399001.1	https://simrbase.stowers.org/feature/Nematostella/vectensis/mRNA/NV2t003399001.1	NV2.3399	FBtr0345284	Host cell factor 1-like	NvHCF1	Other	Uncharacterized ECM domain-containing proteins	N0.HOG0001107	OG0000114			D3ZN95.1	Host cell factor 1	0.456514	no hit	0.146299	0.383619	0.990463	no hit	0.00315755	0.984613	0.466897	no hit	0.143142	0.393476
NV2t007762001.1	https://simrbase.stowers.org/feature/Nematostella/vectensis/mRNA/NV2t007762001.1	NV2.7762	CUB domain-containing protein 2	Ig and CUB domain-containing protein	NvIgCub	Other	Uncharacterized ECM domain-containing proteins	N0.HOG0001365	OG0000304	Cnidaria specific	Cnidaria specific	Q8BQH6.2	CUB domain-containing protein 2
NV2t023484001.1	https://simrbase.stowers.org/feature/Nematostella/vectensis/mRNA/NV2t023484001.1	NV2.23484	neuropilin 2	MAM and CUB domain-containing protein	NvMAMCUB	Other	Uncharacterized ECM domain-containing proteins	N0.HOG0000968	OG0000058			Q9TU53.1	Cubilin	0.0128814	candidate	0.857901	0.00535139	0.00410242	hit	-1.33093	0.000377206	0.000155063	hit	2.18883	1.13223e-05
NV2t014399001.1	https://simrbase.stowers.org/feature/Nematostella/vectensis/mRNA/NV2t014399001.1	NV2.14399	72 kDa type IV collagenase	MAM and Fibronectin type II domain-containing protein	NvMAMFnt	Other	Uncharacterized ECM domain-containing proteins	N0.HOG0001209	OG0000170			P33434.1	72 kDa type IV collagenase	0.000581397	hit	1.41023	5.0482e-05	8.56862e-05	hit	-3.3583	7.24748e-08	4.9149e-06	hit	4.76854	4.6468e-09
NV2t021336001.1	https://simrbase.stowers.org/feature/Nematostella/vectensis/mRNA/NV2t021336001.1	NV2.21336	Putative vacuolar protein sorting-associated protein TDA6	Putative vacuolar protein sorting-associated protein TDA6-1	NvTDA6-1	Other	Uncharacterized ECM domain-containing proteins	N0.HOG0002158	OG0001095			Q06466.1	Putative vacuolar protein sorting-associated protein TDA6
NV2t002896001.1	https://simrbase.stowers.org/feature/Nematostella/vectensis/mRNA/NV2t002896001.1	NV2.2896	Putative vacuolar protein sorting-associated protein TDA6	Putative vacuolar protein sorting-associated protein TDA6-2	NvTDA6-2	Other	Uncharacterized ECM domain-containing proteins	N0.HOG0002158	OG0001095			Q06466.1	Putative vacuolar protein sorting-associated protein TDA6	0.0101079	hit	1.42548	0.00387082	0.653602	no hit	-0.231692	0.531557	0.00475561	hit	1.65717	0.00161344
NV2t000650001.1	https://simrbase.stowers.org/feature/Nematostella/vectensis/mRNA/NV2t000650001.1	NV2.650	epidermal growth factor	Secreted integrin-N-related protein	NvSIntN	Other	Uncharacterized ECM domain-containing proteins	N0.HOG0001436	OG0000374	Cnidaria specific	Cnidaria specific	P10079.2	Fibropellin-1	0.491337	no hit	0.351156	0.419267	0.000315865	hit	-4.60594	3.87927e-06	5.98894e-05	hit	4.9571	2.22773e-06
