# Supplementary material for: Molecular dynamics of the matrisome across sea anemone life history
Source: eLife. 2025 Oct 23;14:RP105319. doi: 10.7554/eLife.105319 (PMC12549020; doi:10.7554/eLife.105319)
Supplement: Supplementary file 2. — Related to Figures 1 and 4. qupm: quantified unique peptide matches, top3: average log10 MS1 intensity of the three most abundant peptides for a given protein. norm_batchcl_raw_signal_sum: normalized and batch-cleaned reporter ion intensities from the TMT experiment. [file elife-105319-supp2.xlsx]

## Sheet: Sheet1
Supplementary File 2. Full mass spectrometry data of the Nematostella mesoglea. Related to Figs. 1 and 4. qupm: quantified unique peptide matches, top3: average log10 MS1 intensity of the three most abundant peptides for a given protein. norm_batchcl_raw_signal_sum: normalized and batch-cleaned reporter ion intensities from the TMT experiment.
protein_id	new_manual_annotation	qupm	top3	norm_batchcl_raw_signal_sum_Adult_rep1	norm_batchcl_raw_signal_sum_Adult_rep2	norm_batchcl_raw_signal_sum_Adult_rep3	norm_batchcl_raw_signal_sum_Larvae_rep1	norm_batchcl_raw_signal_sum_Larvae_rep2	norm_batchcl_raw_signal_sum_Larvae_rep3	norm_batchcl_raw_signal_sum_PrimaryPolyp_rep1	norm_batchcl_raw_signal_sum_PrimaryPolyp_rep2	norm_batchcl_raw_signal_sum_PrimaryPolyp_rep3					ctrl.ratio_Larvae_rep2	ctrl.ratio_Larvae_rep3	ctrl.ratio_PrimaryPolyp_rep1	ctrl.ratio_PrimaryPolyp_rep2	ctrl.ratio_PrimaryPolyp_rep3
NV2t000010001.1		5	7.31846	1.16411e+08	7.5159e+07	1.08612e+08	2.64167e+08	5.53659e+08	2.50626e+08	4.25791e+08	3.14465e+08	4.80733e+08					1.92419	0.871029	1.4798	1.0929	1.67074
NV2t000012001.1		29	6.91459	4.18588e+08	3.92311e+08	3.98261e+08	3.00455e+08	2.90901e+08	3.45102e+08	3.93138e+08	4.32974e+08	3.59531e+08					0.785922	0.932354	1.06213	1.16976	0.971338
NV2t000013001.1		17	6.78466	2.80176e+08	2.48042e+08	2.4515e+08	2.30896e+08	2.4037e+08	2.60191e+08	4.55589e+08	4.94016e+08	4.61781e+08					0.741829	0.803	1.40604	1.52463	1.42515
NV2t000017002.1		11	6.79659	1.02797e+08	9.99753e+07	1.32592e+08	1.35748e+08	1.50481e+08	1.20329e+08	9.61889e+07	8.91641e+07	8.40797e+07					1.33912	1.0708	0.855981	0.793467	0.748222
NV2t000019001.1		9	6.50877	9.6615e+07	9.86367e+07	9.29192e+07	9.7209e+07	8.73919e+07	9.90498e+07	1.1145e+08	1.21352e+08	1.13661e+08					0.856518	0.970775	1.09231	1.18936	1.11398
NV2t000020001.1		3	5.67266	7.96373e+06	7.9322e+06	6.46571e+06	8.3649e+06	1.04837e+07	1.51127e+07	1.23835e+07	9.91372e+06	8.43726e+06					1.08381	1.56235	1.28021	1.02488	0.872244
NV2t000021001.1	Ferric-chelate reductase 1-2	3	6.17904	1.81779e+07	1.931e+07	1.7067e+07	3.03163e+07	3.36055e+07	2.36104e+07	4.97077e+07	4.2187e+07	6.79393e+07					1.00175	0.703806	1.48174	1.25756	2.02521
NV2t000021003.1		3	6.17904	1.81779e+07	1.931e+07	1.7067e+07	3.03163e+07	3.36055e+07	2.36104e+07	4.97077e+07	4.2187e+07	6.79393e+07					1.00175	0.703806	1.48174	1.25756	2.02521
NV2t000025001.1		5	6.08291	3.04082e+07	3.12584e+07	3.58961e+07	3.45794e+07	3.47264e+07	2.54949e+07	2.32823e+07	2.2539e+07	2.67345e+07					1.17975	0.86613	0.790962	0.765708	0.908242
NV2t000027001.1	Ferric-chelate reductase 1-1	13	7.91345	4.88201e+08	5.57646e+08	5.81211e+08	2.22377e+08	1.56437e+08	2.01273e+08	3.53938e+08	4.40194e+08	3.28273e+08					0.422859	0.544054	0.95672	1.18987	0.887344
NV2t000032001.1		6	6.27699	6.14407e+07	8.45519e+07	5.52116e+07	5.38393e+07	3.94978e+07	6.36619e+07	4.08973e+07	4.04837e+07	3.84662e+07					0.743604	1.19853	0.769952	0.762165	0.724183
NV2t000035002.1		11	6.63639	7.92554e+07	8.05246e+07	6.40027e+07	1.20104e+08	1.048e+08	1.20437e+08	8.1549e+07	9.19268e+07	1.00644e+08					1.11854	1.28543	0.870379	0.981143	1.07418
NV2t000036001.1		27	6.7003	3.76742e+08	3.85714e+08	3.29732e+08	2.33235e+08	2.16112e+08	2.38551e+08	1.92802e+08	2.03109e+08	2.15251e+08					0.813385	0.897841	0.725653	0.764449	0.810145
NV2t000042001.1		8	6.4952	5.66924e+07	5.0475e+07	6.7375e+07	1.40054e+08	1.77113e+08	9.66604e+07	1.30313e+08	1.15666e+08	1.58781e+08					1.60505	0.875962	1.18093	1.04819	1.43891
NV2t000048001.1		20	6.58382	1.52644e+08	1.6803e+08	1.66043e+08	1.40478e+08	1.07517e+08	1.31892e+08	1.24441e+08	1.47609e+08	1.21773e+08					0.767718	0.941764	0.888563	1.05399	0.869514
NV2t000051001.1		7	6.57263	3.82811e+07	2.84329e+07	2.90516e+07	5.61769e+07	7.30983e+07	4.88049e+07	4.48485e+07	4.63755e+07	6.79825e+07					1.51918	1.0143	0.932074	0.963809	1.41286
NV2t000054001.1		8	7.25678	3.04611e+08	2.91435e+08	2.70589e+08	1.25621e+08	1.28762e+08	1.23939e+08	3.76865e+08	3.84052e+08	4.29749e+08					0.475795	0.457973	1.39257	1.41913	1.58799
NV2t000060001.1		4	5.87214	2.25716e+07	1.8243e+07	1.94244e+07	2.24656e+07	3.24532e+07	3.003e+07	2.04022e+07	1.74634e+07	1.77253e+07					1.45473	1.34611	0.914538	0.782805	0.794544
NV2t000061001.1		2	6.69996	3.47182e+07	3.95057e+07	5.70104e+07	9.84714e+06	8.27636e+06	8.17494e+06	2.12214e+07	2.21753e+07	1.55576e+07					0.344072	0.339856	0.882237	0.921891	0.646775
NV2t000063003.1		2	5.76658	5.00815e+06	6.4407e+06	4.3839e+06	4.85048e+06	4.22973e+06	5.39835e+06	3.69345e+06	3.29135e+06	3.78889e+06					0.926557	1.18255	0.80908	0.720997	0.829987
NV2t000074001.1	Vitellogenin-like	8	6.57988	8.12217e+07	8.0044e+07	5.89936e+07	6.97369e+07	6.47313e+07	4.80293e+07	4.77933e+07	5.22137e+07	9.54836e+07					0.973813	0.722551	0.718999	0.7855	1.43645
NV2t000075001.1		10	6.58795	1.1309e+08	1.03005e+08	1.06198e+08	1.44842e+08	1.38115e+08	1.26614e+08	1.7374e+08	1.99915e+08	2.11524e+08					0.943809	0.865218	1.18725	1.36612	1.44545
NV2t000076001.1		2	6.03976	1.91658e+07	1.95274e+07	1.72702e+07	4.903e+07	3.16289e+07	4.41684e+07	2.48025e+07	3.7712e+07	3.05362e+07					1.03951	1.45163	0.815154	1.23943	1.0036
NV2t000082001.1		31	6.96395	4.7251e+08	4.97072e+08	4.42943e+08	3.10219e+08	2.87522e+08	3.53193e+08	4.17705e+08	4.28138e+08	3.91136e+08					0.718718	0.882875	1.04414	1.07022	0.977721
NV2t000087001.1	ADAMTS-like metalloprotease-19	7	6.33653	5.48984e+07	5.74624e+07	4.75304e+07	4.85435e+07	4.39095e+07	6.84796e+07	7.58301e+07	8.00416e+07	6.20496e+07					0.73353	1.14398	1.26678	1.33713	1.03657
NV2t000088001.1	ADAMTS metalloprotease-7	12	6.40939	9.89214e+07	1.29822e+08	1.03169e+08	7.73843e+07	5.78335e+07	8.66318e+07	6.90281e+07	7.03345e+07	5.90858e+07					0.691963	1.03653	0.825904	0.841534	0.706947
NV2t000100001.1		3	6.5278	3.72672e+07	3.76174e+07	4.04126e+07	2.94232e+07	2.49268e+07	2.07654e+07	4.43922e+07	5.18793e+07	5.79702e+07					0.650917	0.54225	1.15922	1.35473	1.51378
NV2t000101001.1		13	8.45608	8.43694e+08	9.66076e+08	8.21944e+08	2.67246e+08	2.80786e+08	3.45904e+08	4.8416e+08	4.02182e+08	3.83729e+08					0.526944	0.649149	0.90861	0.754765	0.720134
NV2t000112002.1		5	6.07103	2.62918e+07	3.22076e+07	2.17258e+07	3.43187e+07	2.79013e+07	3.9117e+07	2.72947e+07	2.73888e+07	2.89619e+07					0.94685	1.32746	0.926264	0.929457	0.982843
NV2t000121001.1		8	7.00731	9.89436e+07	1.20275e+08	1.14639e+08	6.16645e+07	6.08162e+07	5.9139e+07	1.00185e+08	8.35132e+07	9.0107e+07					0.693473	0.674348	1.14238	0.952281	1.02747
NV2t000123001.1		14	6.83338	1.70708e+08	1.9065e+08	1.56701e+08	7.46155e+07	7.6515e+07	9.03214e+07	1.47612e+08	1.28809e+08	1.32764e+08					0.589233	0.695554	1.13675	0.991945	1.0224
NV2t000124001.1		6	6.97911	8.51708e+07	9.63207e+07	8.05501e+07	8.27176e+07	8.38155e+07	7.83491e+07	5.16897e+07	4.5079e+07	5.76676e+07					1.14059	1.0662	0.703411	0.61345	0.784759
NV2t000125001.1		2	6.45	1.0924e+07	1.21971e+07	8.67156e+06	1.18676e+07	1.01932e+07	1.57333e+07	7.61312e+06	7.93346e+06	7.22981e+06					0.993243	1.53308	0.741834	0.773049	0.704484
NV2t000126001.1		24	7.79982	9.12451e+08	7.25131e+08	1.00361e+09	4.33451e+08	5.78407e+08	4.51961e+08	8.27461e+08	7.7978e+08	7.21054e+08					0.809173	0.63228	1.15759	1.09089	1.00873
NV2t000128001.1	Desert hedgehog protein A
NV2t000129002.1		10	6.71566	9.08084e+07	1.48564e+08	1.11398e+08	1.49509e+08	7.17162e+07	1.18991e+08	1.15839e+08	1.47517e+08	1.18575e+08					0.60158	0.99814	0.971693	1.23742	0.994647
NV2t000132001.1		10	8.18129	5.14212e+08	3.61406e+08	4.38409e+08	1.18133e+09	1.28841e+09	8.86731e+08	1.12495e+09	1.46664e+09	1.75677e+09					1.28571	0.884877	1.12259	1.46358	1.7531
NV2t000133001.1		4	7.03395	5.1839e+07	4.61148e+07	4.81826e+07	4.64905e+07	5.30712e+07	5.04103e+07	7.6188e+07	7.49779e+07	7.55505e+07					0.913578	0.867772	1.31151	1.29068	1.30054
NV2t000137001.1	Copine-1	2	6.37553	2.47464e+07	2.58752e+07	2.66309e+07	1.40331e+07	1.27715e+07	1.6383e+07	2.49589e+07	2.62114e+07	1.98541e+07					0.600339	0.770102	1.17322	1.2321	0.933264
NV2t000137003.1		2	6.37553	2.47464e+07	2.58752e+07	2.66309e+07	1.40331e+07	1.27715e+07	1.6383e+07	2.49589e+07	2.62114e+07	1.98541e+07					0.600339	0.770102	1.17322	1.2321	0.933264
NV2t000150001.1		12	6.6029	1.61827e+08	1.71819e+08	1.73247e+08	1.83367e+08	1.68826e+08	1.75939e+08	1.28823e+08	1.31697e+08	1.25336e+08					1.06936	1.11441	0.815977	0.834184	0.793888
NV2t000152001.1		3	6.20241	1.04768e+07	5.78981e+06	1.28185e+07	2.28835e+07	3.93291e+07	1.47863e+07	7.88167e+06	8.29312e+06	9.96355e+06					2.67702	1.00646	0.536482	0.564489	0.678191
NV2t000153001.1		10	7.11732	1.21912e+08	1.66141e+08	1.0714e+08	1.12261e+08	8.01258e+07	1.21922e+08	1.16036e+08	1.19218e+08	1.21499e+08					0.676322	1.02911	0.97943	1.00629	1.02554
NV2t000157001.1		2	6.1386	1.41863e+07	1.52522e+07	1.46897e+07	2.12662e+07	1.41283e+07	1.62163e+07	1.98419e+07	2.77616e+07	2.51139e+07					0.754824	0.866375	1.06008	1.4832	1.34174
NV2t000173001.1	Inhibin beta B chain
NV2t000183001.1		3	6.20392	2.46174e+07	2.72825e+07	3.61145e+07	1.71342e+07	2.11199e+07	1.83026e+07	2.14175e+07	1.56684e+07	1.3659e+07					0.973189	0.84337	0.9869	0.721985	0.629396
NV2t000185001.1		3	5.86607	1.40447e+07	2.08039e+07	1.6039e+07	1.73321e+07	1.25243e+07	1.57822e+07	1.52202e+07	1.42106e+07	1.46278e+07					0.801784	1.01035	0.974372	0.909737	0.936446
NV2t000187001.1		5	6.93175	1.27446e+08	1.24554e+08	1.42063e+08	5.34984e+07	7.29926e+07	6.06964e+07	1.13039e+08	8.47194e+07	8.9328e+07					0.756541	0.629097	1.17161	0.878086	0.925852
NV2t000195002.1		17	6.89794	2.1256e+08	2.02413e+08	1.88775e+08	1.96195e+08	2.24873e+08	2.2888e+08	3.23921e+08	2.96591e+08	3.1246e+08					0.925545	0.942036	1.33321	1.22072	1.28604
NV2t000196001.1		6	7.74312	2.63709e+08	1.85583e+08	2.59073e+08	6.79592e+08	7.91366e+08	4.03049e+08	5.89342e+08	7.18704e+08	1.01088e+09					1.45314	0.740098	1.08218	1.31972	1.85622
NV2t000198001.1		14	7.36015	2.13869e+08	2.23783e+08	2.68228e+08	2.08794e+08	2.02217e+08	1.91299e+08	3.04319e+08	3.00106e+08	2.64677e+08					0.83588	0.79075	1.25792	1.24051	1.09406
NV2t000199001.1		3	6.61122	5.1291e+07	4.65397e+07	7.87752e+07	1.26182e+07	1.28814e+07	1.52048e+07	1.48767e+07	1.60502e+07	8.03365e+06					0.452384	0.533978	0.522456	0.56367	0.282134
NV2t000200001.1		2	6.56657	1.03455e+07	1.10552e+07	1.04151e+07	7.95036e+06	1.17215e+07	8.34233e+06	1.79731e+07	1.14008e+07	1.70039e+07					0.993275	0.706925	1.52303	0.966102	1.4409
NV2t000206003.1		28	7.12987	4.72276e+08	4.11542e+08	4.44963e+08	2.37592e+08	2.73874e+08	2.6426e+08	3.62473e+08	3.60633e+08	3.4569e+08					0.77675	0.749485	1.02803	1.02281	0.980433
NV2t000208001.1		10	7.32242	1.85688e+08	3.49029e+08	1.45457e+08	9.25715e+08	2.29651e+08	6.47449e+08	1.59811e+08	3.42501e+08	2.91517e+08					0.630752	1.77826	0.438931	0.940702	0.800671
NV2t000211004.1		2	6.82055	3.95664e+07	2.91845e+07	3.82691e+07	5.52902e+06	8.02548e+06	1.06678e+07	1.03869e+07	9.69534e+06	5.5626e+06					0.460391	0.611967	0.595856	0.556184	0.319104
NV2t000215001.1		11	6.99128	1.69946e+08	2.04662e+08	3.16413e+08	1.0552e+08	1.01201e+08	8.03608e+07	9.82193e+07	8.49862e+07	6.92282e+07					0.740169	0.587749	0.718364	0.621579	0.506327
NV2t000227001.1		5	5.85867	1.33798e+07	1.34953e+07	1.21545e+07	1.95813e+07	1.64281e+07	2.37539e+07	1.69696e+07	2.0041e+07	1.53897e+07					0.977909	1.41398	1.01014	1.19297	0.916095
NV2t000228001.1		11	6.64248	1.38107e+08	1.65187e+08	1.70423e+08	2.22511e+08	2.2184e+08	2.19526e+08	1.7949e+08	1.50425e+08	1.47345e+08					1.23637	1.22348	1.00035	0.838356	0.821189
NV2t000235001.1		4	7.11657	1.28538e+08	1.32175e+08	1.20952e+08	1.8122e+08	1.44949e+08	2.31863e+08	8.6685e+07	1.05328e+08	7.19574e+07					1.08381	1.73367	0.648157	0.787552	0.538036
NV2t000238001.1		9	7.264	2.0706e+08	2.91608e+08	2.53672e+08	4.63116e+07	3.16213e+07	6.23313e+07	6.5029e+07	6.75833e+07	3.94142e+07					0.267315	0.526927	0.549732	0.571325	0.333193
NV2t000241001.1		9	8.87674	1.32432e+09	1.92662e+09	1.1807e+09	2.50062e+09	4.02348e+09	1.75855e+09	2.7456e+09	1.17221e+09	4.37644e+09					1.72365	0.753356	1.17621	0.50217	1.87486
NV2t000244001.1	Hemolin-like-3	6	6.50276	4.95054e+07	5.16808e+07	5.10007e+07	6.4839e+07	4.86061e+07	6.27599e+07	3.91951e+07	5.00526e+07	3.92827e+07					0.957395	1.23618	0.772026	0.985885	0.773752
NV2t000245001.1		5	6.37775	2.05493e+07	2.10913e+07	2.39178e+07	6.3139e+07	6.8329e+07	5.87479e+07	4.9089e+07	4.41668e+07	4.53005e+07					1.55951	1.34083	1.12038	1.00804	1.03392
NV2t000249001.1		10	6.42036	1.04731e+08	9.22995e+07	1.10531e+08	3.3507e+08	5.6942e+08	2.7987e+08	3.17164e+08	2.11635e+08	3.59579e+08					2.153	1.0582	1.19921	0.8002	1.35958
NV2t000251001.1		9	6.13815	6.59424e+07	6.47584e+07	6.30707e+07	8.98392e+07	1.15341e+08	1.12103e+08	1.08687e+08	8.61497e+07	9.10123e+07					1.30263	1.26606	1.22748	0.972951	1.02787
NV2t000252001.1		2	6.53855	7.12192e+07	4.45696e+07	4.04926e+07	9.47594e+07	1.15306e+08	1.40431e+08	4.19077e+07	5.49982e+07	4.97067e+07					1.58826	1.93434	0.57725	0.757563	0.684675
NV2t000254004.1		3	6.0455	1.45076e+07	1.12896e+07	2.12274e+07	1.45406e+07	1.87433e+07	1.03795e+07	1.92403e+07	1.91686e+07	1.84101e+07					1.1436	0.633297	1.17393	1.16955	1.12327
NV2t000257001.1		24	7.00869	3.35008e+08	2.59854e+08	2.47972e+08	2.92157e+08	3.84398e+08	3.9559e+08	2.28549e+08	2.23803e+08	2.27899e+08					1.33305	1.37187	0.792585	0.776128	0.79033
NV2t000258001.1		3	6.17951	1.63672e+07	1.45956e+07	1.40933e+07	2.05927e+07	2.70874e+07	1.4655e+07	1.38417e+07	1.17927e+07	2.25744e+07					1.56675	0.847653	0.800614	0.682099	1.30572
NV2t000259001.1		8	6.76481	6.86061e+07	5.59297e+07	5.75661e+07	5.18296e+07	5.60096e+07	7.00829e+07	5.1483e+07	5.84017e+07	4.53488e+07					0.97832	1.22414	0.899254	1.0201	0.792106
NV2t000261001.1		5	6.34195	3.52129e+07	3.38399e+07	2.82284e+07	3.88377e+07	5.52202e+07	5.32287e+07	3.73032e+07	2.72835e+07	3.39319e+07					1.44856	1.39632	0.978555	0.715713	0.890117
NV2t000264001.1		8	7.22886	1.70326e+08	1.55318e+08	1.6855e+08	1.58306e+08	2.18047e+08	1.28946e+08	1.36556e+08	1.08653e+08	1.69313e+08					1.38784	0.820725	0.869161	0.691562	1.07765
NV2t000273001.1		3	6.21472	1.13628e+07	1.09968e+07	9.52305e+06	4.375e+07	3.7274e+07	3.49088e+07	3.73887e+07	4.53165e+07	5.58769e+07					1.17133	1.097	1.17493	1.42406	1.75592
NV2t000274001.1		3	6.18014	2.78241e+07	1.94088e+07	2.4718e+07	5.12201e+07	6.97489e+07	4.76983e+07	2.41115e+07	2.53674e+07	2.91279e+07					1.96645	1.34477	0.679782	0.71519	0.82121
NV2t000281001.1		20	7.35052	4.63468e+08	4.80497e+08	5.07311e+08	5.0112e+08	5.00785e+08	5.30342e+08	4.03896e+08	3.89596e+08	3.48448e+08					1.0925	1.15698	0.881128	0.849931	0.760165
NV2t000283001.1		4	6.22123	4.03127e+07	2.983e+07	3.18665e+07	5.5171e+07	6.48689e+07	4.66208e+07	5.5945e+07	6.42614e+07	8.37028e+07					1.23539	0.887866	1.06544	1.22382	1.59407
NV2t000284003.1		17	7.57022	4.86055e+08	5.03895e+08	5.37046e+08	3.72724e+08	3.38526e+08	3.47551e+08	4.64831e+08	4.93358e+08	4.50897e+08					0.762659	0.782991	1.04721	1.11148	1.01582
NV2t000289001.1		3	6.69886	7.78e+07	6.99809e+07	5.88808e+07	1.26288e+08	1.4742e+08	1.31965e+08	9.1595e+07	8.71772e+07	1.15749e+08					1.46305	1.30967	0.909026	0.865182	1.14874
NV2t000291001.1		5	6.43163	3.06765e+07	4.83639e+07	4.07663e+07	6.63195e+07	4.96617e+07	7.47361e+07	1.23376e+08	1.04438e+08	8.23348e+07					0.720114	1.0837	1.78899	1.5144	1.19389
NV2t000292001.1		2	5.696	1.17621e+07	1.01155e+07	1.03321e+07	2.23746e+07	3.38988e+07	1.98473e+07	1.18537e+07	9.09174e+06	1.52035e+07					2.11164	1.23634	0.7384	0.566348	0.947067
NV2t000293001.1		4	6.66021	8.88836e+07	7.23702e+07	5.63936e+07	4.3273e+07	6.114e+07	7.25924e+07	4.87286e+07	4.23314e+07	4.57552e+07					1.03536	1.2293	0.825181	0.716849	0.774829
NV2t000296001.1		8	7.51264	2.12495e+08	2.34554e+08	2.03139e+08	5.63246e+08	2.80583e+08	3.81246e+08	1.36675e+08	2.48403e+08	2.11094e+08					1.02177	1.38835	0.497718	0.904586	0.76872
NV2t000306001.1		7	8.16028	3.73138e+08	3.85131e+08	3.6641e+08	2.05511e+08	1.8157e+08	2.3582e+08	2.40845e+08	2.63946e+08	2.13616e+08					0.662669	0.860661	0.879	0.96331	0.779623
NV2t000320001.1	Kunitz-type serine protease inhibitor-2	10	7.97179	3.75574e+08	5.21558e+08	3.25227e+08	8.90771e+07	7.26408e+07	1.11137e+08	9.0459e+07	7.9828e+07	8.36775e+07					0.373757	0.571828	0.465437	0.410737	0.430544
NV2t000324001.1		6	6.93041	6.39816e+07	7.6603e+07	6.49814e+07	2.78991e+07	2.41752e+07	3.33704e+07	4.17042e+07	4.01731e+07	3.43095e+07					0.534327	0.737563	0.921758	0.887918	0.758318
NV2t000325001.1	IgCAM-related receptor protein-2
NV2t000332001.1		6	6.72058	7.52555e+07	7.51323e+07	6.76208e+07	3.29659e+07	3.02069e+07	4.27691e+07	4.27609e+07	4.67136e+07	3.66588e+07					0.604025	0.855223	0.855059	0.934098	0.733039
NV2t000336001.1		8	6.60638	7.52419e+07	8.18013e+07	5.10264e+07	2.35673e+07	2.2278e+07	2.7431e+07	2.2367e+07	2.17504e+07	2.83192e+07					0.566737	0.697826	0.569003	0.553317	0.720423
NV2t000340002.1		11	6.82296	1.38427e+08	1.1853e+08	1.25919e+08	8.73032e+07	9.60698e+07	1.12863e+08	9.60177e+07	1.01839e+08	8.16015e+07					0.901997	1.05967	0.901508	0.95616	0.766154
NV2t000343001.1		8	6.88399	1.21515e+08	9.74457e+07	9.99766e+07	1.41628e+08	1.74645e+08	1.41766e+08	1.24706e+08	1.26031e+08	1.51335e+08					1.33311	1.08214	0.951913	0.962027	1.15518
NV2t000351001.1		4	7.06633	7.51768e+07	6.01948e+07	8.64494e+07	5.47783e+07	7.14698e+07	4.56357e+07	3.99216e+07	3.81896e+07	4.16459e+07					1.25273	0.799906	0.699749	0.66939	0.729973
NV2t000353001.1		4	6.40987	3.54546e+07	3.25229e+07	3.56774e+07	2.97883e+07	4.90558e+07	4.09605e+07	4.05751e+07	2.68426e+07	2.93061e+07					1.3789	1.15135	1.14052	0.754517	0.823763
NV2t000356001.1		5	7.18276	1.53644e+08	1.31121e+08	1.46383e+08	1.22338e+08	1.098e+08	1.19889e+08	5.71198e+07	7.45278e+07	6.11412e+07					1.01254	1.10557	0.526739	0.687269	0.563823
NV2t000357001.1		7	6.56027	8.44503e+07	6.33174e+07	7.75628e+07	3.11382e+07	3.87456e+07	4.83214e+07	3.52752e+07	3.77871e+07	2.47349e+07					0.790131	0.985407	0.719358	0.770584	0.504413
NV2t000360001.1	Contactin-like	11	6.60872	1.161e+08	1.48482e+08	1.13242e+08	2.24123e+08	1.45281e+08	2.15161e+08	1.92138e+08	2.31619e+08	2.05069e+08					0.821719	1.21696	1.08674	1.31005	1.15988
NV2t000361002.1		5	6.49108	4.58757e+07	3.75912e+07	4.42179e+07	1.0881e+08	1.3836e+08	9.37955e+07	2.77716e+08	2.66369e+08	3.34051e+08					0.924598	0.626795	1.85586	1.78003	2.23232
NV2t000361004.1	IgCAM-like receptor protein-1	5	6.49108	4.58757e+07	3.75912e+07	4.42179e+07	1.0881e+08	1.3836e+08	9.37955e+07	2.77716e+08	2.66369e+08	3.34051e+08					0.924598	0.626795	1.85586	1.78003	2.23232
NV2t000362001.1		2	5.65399	4.31521e+06	4.75605e+06	3.4233e+06	7.13517e+06	5.35309e+06	8.0033e+06	5.62125e+06	6.79383e+06	6.31342e+06					0.931609	1.39283	0.978278	1.18234	1.09874
NV2t000363001.1	Minicollagen-like-1
NV2t000369001.1		2	5.67972	8.36829e+06	7.14388e+06	1.01028e+07	2.02792e+07	2.77089e+07	2.03575e+07	8.26448e+06	7.08069e+06	6.81515e+06					2.14759	1.57782	0.640542	0.548792	0.528211
NV2t000374001.1		2	6.201	6.35206e+06	8.46355e+06	7.08202e+06	2.28726e+07	1.23467e+07	1.89966e+07	1.34379e+07	1.86717e+07	1.45033e+07					0.905433	1.39309	0.985453	1.36926	1.06358
NV2t000376002.1		8	7.16351	1.40913e+08	1.10582e+08	1.67714e+08	1.97449e+08	2.93263e+08	1.57624e+08	1.8527e+08	1.58852e+08	1.94876e+08					1.64289	0.883023	1.0379	0.889906	1.09171
NV2t000382001.1		9	7.28986	1.7167e+08	1.22553e+08	1.44841e+08	4.30749e+07	5.12636e+07	5.38285e+07	4.0442e+07	4.75709e+07	3.8334e+07					0.646562	0.678912	0.510074	0.599988	0.483487
NV2t000385001.1		17	7.49161	2.84229e+08	3.02105e+08	3.63975e+08	1.36715e+08	1.25794e+08	1.3423e+08	1.4754e+08	1.50766e+08	1.17277e+08					0.642305	0.685378	0.753339	0.76981	0.598817
NV2t000387001.1		8	6.60003	9.59557e+07	1.06653e+08	1.01483e+08	1.54786e+08	1.39833e+08	1.77295e+08	1.5384e+08	1.53112e+08	1.26917e+08					1.04019	1.31886	1.14438	1.13897	0.944105
NV2t000388001.1		26	7.10898	3.6235e+08	3.572e+08	3.79839e+08	3.22541e+08	3.57181e+08	3.53812e+08	2.62961e+08	2.4073e+08	2.28545e+08					1.12197	1.11139	0.826009	0.756178	0.717903
NV2t000392001.1		2	6.55723	7.68971e+06	8.95636e+06	8.91568e+06	2.18243e+07	1.63968e+07	1.73821e+07	1.83688e+07	2.09781e+07	1.98798e+07					1.05114	1.11431	1.17756	1.34483	1.27442
NV2t000394002.1		2	5.85695	1.20651e+07	1.42136e+07	9.02626e+06	1.05166e+07	1.0074e+07	1.0012e+07	2.136e+07	1.89159e+07	2.99721e+07					0.665902	0.661802	1.41191	1.25036	1.98118
NV2t000403001.1		10	6.73239	8.70134e+07	6.72215e+07	6.96973e+07	7.60381e+07	1.11989e+08	1.14256e+08	8.15818e+07	7.16559e+07	6.77415e+07					1.34892	1.37622	0.982657	0.8631	0.81595
NV2t000405001.1		4	7.14882	2.16797e+08	1.28342e+08	3.01753e+08	2.90094e+08	5.11661e+08	2.0439e+08	9.90264e+07	9.47803e+07	1.00919e+08					2.36422	0.944423	0.45757	0.43795	0.466314
NV2t000407001.1		7	6.75325	8.03121e+07	8.24435e+07	7.78271e+07	4.97531e+07	4.33486e+07	6.85132e+07	4.54974e+07	5.08372e+07	3.40738e+07					0.732506	1.15774	0.768816	0.85905	0.575781
NV2t000408001.1		14	7.47867	3.23646e+08	3.01264e+08	2.72413e+08	2.25889e+08	2.4998e+08	2.62678e+08	2.60638e+08	2.52857e+08	2.66128e+08					0.931413	0.978724	0.971125	0.942133	0.991579
NV2t000411001.1		6	6.23078	3.4238e+07	3.67857e+07	4.09241e+07	1.0547e+08	9.72675e+07	9.67981e+07	4.80313e+07	4.84441e+07	4.37578e+07					1.5867	1.57904	0.783521	0.790255	0.713809
NV2t000415001.1		3	6.17108	1.29788e+07	1.21913e+07	1.12022e+07	1.78505e+07	1.94958e+07	1.25704e+07	1.04762e+07	1.02052e+07	1.72255e+07					1.41279	0.910929	0.759167	0.739529	1.24827
NV2t000416001.1		8	6.87707	1.59297e+08	1.57873e+08	2.3243e+08	5.98825e+07	6.28146e+07	6.209e+07	7.8467e+07	7.54317e+07	5.18348e+07					0.601339	0.594403	0.751184	0.722126	0.496227
NV2t000425001.1		2	6.18835	1.41361e+07	1.2387e+07	1.24225e+07	2.63838e+07	3.14279e+07	2.03237e+07	1.76332e+07	1.68827e+07	2.60331e+07					1.59236	1.02974	0.893424	0.855396	1.31902
NV2t000426001.1		5	7.16036	9.14637e+07	9.75512e+07	9.15158e+07	4.36097e+07	4.4679e+07	6.7245e+07	7.50336e+07	6.86242e+07	4.86039e+07					0.639972	0.963202	1.07476	0.982958	0.696191
NV2t000428001.1		2	5.9831	2.50871e+06	3.16576e+06	1.7691e+06				1.27753e+06	1.32468e+06	1.82996e+06							0.645448	0.669269	0.924555
NV2t000445001.1		7	6.75646	1.11152e+08	5.08424e+07	2.00872e+08	3.5612e+08	9.14887e+08	1.79773e+08	1.50835e+08	1.28276e+08	1.65238e+08					3.64659	0.716544	0.601202	0.511288	0.658612
NV2t000447001.1		8	6.33663	4.5615e+07	5.04989e+07	4.34297e+07	3.51389e+07	2.91682e+07	3.80695e+07	4.1119e+07	4.4717e+07	3.98395e+07					0.714138	0.932072	1.00673	1.09482	0.975406
NV2t000460001.1		7	6.66944	6.49686e+07	5.08304e+07	4.34367e+07	5.20447e+07	6.01796e+07	5.7275e+07	3.80242e+07	4.20043e+07	5.16485e+07					1.17637	1.1196	0.743286	0.821087	1.00961
NV2t000464001.1		5	6.29404	2.76408e+07	3.10205e+07	2.4761e+07	2.72106e+07	1.94006e+07	2.59448e+07	2.31792e+07	2.89498e+07	2.71211e+07					0.742282	0.992664	0.886851	1.10764	1.03767
NV2t000465001.1		6	6.55696	3.9265e+07	3.64733e+07	2.81888e+07	3.68793e+07	4.11161e+07	5.93239e+07	3.58076e+07	3.45544e+07	3.09882e+07					1.08012	1.55844	0.940666	0.907743	0.814058
NV2t000468001.1		10	7.45611	1.77158e+08	1.54247e+08	1.88272e+08	2.06397e+08	2.59849e+08	1.79226e+08	2.46243e+08	2.245e+08	2.66674e+08					1.2292	0.84782	1.16484	1.06199	1.26149
NV2t000470001.1		2	6.59898	2.76222e+07	2.10014e+07	3.08331e+07	2.92027e+07	4.25183e+07	2.07538e+07	9.15292e+07	8.2631e+07	1.1531e+08					0.829354	0.404819	1.78535	1.61178	2.24921
NV2t000471001.1		5	6.33194	3.56648e+07	3.29712e+07	2.78397e+07	4.69538e+07	5.30966e+07	5.64104e+07	5.26839e+07	5.03633e+07	5.6144e+07					1.15952	1.23188	1.15051	1.09983	1.22607
NV2t000477001.1		5	7.10585	9.48319e+07	8.8945e+07	9.85177e+07	1.10335e+08	1.20261e+08	9.06663e+07	1.58721e+08	1.55161e+08	1.85816e+08					0.981053	0.739626	1.2948	1.26575	1.51583
NV2t000488001.1		3	6.17487	9.63623e+06	8.49876e+06	8.88667e+06	2.51371e+07	2.89331e+07	2.34127e+07	1.2324e+07	1.21325e+07	1.43392e+07					1.81715	1.47044	0.774014	0.761983	0.900575
NV2t000490001.1		24	7.07011	2.07483e+08	2.50065e+08	2.02068e+08	3.95748e+08	2.60852e+08	4.2398e+08	2.76646e+08	3.4802e+08	2.64985e+08					0.892702	1.45097	0.946752	1.19101	0.906845
NV2t000492002.1		3	5.52978	1.02824e+07	1.54932e+07	8.96538e+06	3.24728e+07	1.62726e+07	3.19238e+07	9.96086e+06	1.31837e+07	1.16136e+07					0.975264	1.91328	0.596981	0.790137	0.696034
NV2t000502001.1	Adhesion GPCR-related-3
NV2t000507001.1		2	5.97285	6.40459e+06	7.39532e+06	5.13405e+06	9.98057e+06	7.29299e+06	6.20355e+06	5.83492e+07	6.91107e+07	1.17036e+08					0.228774	0.194599	1.83036	2.16793	3.67131
NV2t000509001.1		2	5.92226	1.06628e+07	1.11639e+07	1.02142e+07	1.08751e+07	8.74846e+06	1.06879e+07	1.45478e+07	1.72615e+07	1.54433e+07					0.718363	0.877618	1.19457	1.41739	1.2681
NV2t000519003.1		14	6.82389	1.47055e+08	1.47801e+08	1.59521e+08	1.57004e+08	1.41481e+08	1.6143e+08	2.13906e+08	2.36027e+08	1.91668e+08					0.818391	0.933786	1.23733	1.36529	1.1087
NV2t000521001.1		10	6.71492	6.29494e+07	7.61118e+07	7.18134e+07	8.23743e+07	6.12787e+07	8.18982e+07	1.08902e+08	1.20999e+08	9.5957e+07					0.723494	0.966941	1.28576	1.42859	1.13293
NV2t000526001.1		6	6.86393	5.2916e+07	6.70655e+07	5.17776e+07	6.43356e+07	4.33805e+07	4.28626e+07	3.52042e+07	4.11685e+07	5.39698e+07					0.862473	0.852177	0.699915	0.818495	1.073
NV2t000530001.1		2	6.57543	1.96873e+07	1.92409e+07	1.80635e+07	2.53009e+06	3.57386e+06	6.4793e+06	8.89593e+06	6.43987e+06	3.78376e+06					0.362646	0.657467	0.902687	0.653466	0.383945
NV2t000537001.1		4	6.53349	6.04853e+07	5.41313e+07	4.88402e+07	5.80359e+07	5.22466e+07	5.55061e+07	2.81152e+07	3.48744e+07	3.63838e+07					1.09706	1.1655	0.590354	0.732282	0.763975
NV2t000539001.1		2	5.91597	2.86966e+06	2.29046e+06	2.31754e+06	3.02407e+06	4.61943e+06	5.40983e+06	8.2336e+06	6.7488e+06	5.69562e+06					1.00888	1.1815	1.79821	1.47393	1.24392
NV2t000553001.1		14	6.63951	1.11967e+08	1.17636e+08	1.12711e+08	7.26774e+07	6.01272e+07	7.1373e+07	7.85995e+07	9.03693e+07	7.94592e+07					0.680753	0.808078	0.889895	1.02315	0.899629
NV2t000555001.1		19	6.96175	2.70906e+08	2.03256e+08	2.1763e+08	1.73511e+08	2.07247e+08	2.32674e+08	1.19601e+08	1.33375e+08	1.10957e+08					1.11746	1.25456	0.644884	0.71915	0.598272
NV2t000561001.1		2	6.53194	2.53387e+07	2.31691e+07	3.16239e+07	1.30571e+07	1.42525e+07	1.08957e+07	2.64142e+07	2.6448e+07	2.53476e+07					0.652631	0.498921	1.20952	1.21107	1.16068
NV2t000564001.1		2	6.52305	3.50743e+07	3.02048e+07	4.01823e+07	2.00858e+07	2.58399e+07	2.32941e+07	5.08934e+07	4.59092e+07	3.82824e+07					0.750756	0.67679	1.47867	1.33385	1.11226
NV2t000566001.1	Fibrinogen-related protein-16
NV2t000567001.1		7	6.87205	1.15839e+08	1.08491e+08	1.2517e+08	1.01201e+08	9.5644e+07	8.86003e+07	1.80672e+08	2.03988e+08	1.90869e+08					0.711123	0.658752	1.34332	1.51667	1.41913
NV2t000568001.1		19	7.90334	7.35923e+08	1.10394e+09	8.05871e+08	5.88841e+08	3.36403e+08	6.78565e+08	3.24117e+08	3.77964e+08	2.56693e+08					0.581307	1.17256	0.560075	0.653124	0.443566
NV2t000570001.1	Adhesin-like-2
NV2t000571001.1		15	6.94941	1.58967e+08	1.81773e+08	1.97072e+08	1.2165e+08	1.23013e+08	1.08693e+08	1.50986e+08	1.30497e+08	1.36227e+08					0.845849	0.747388	1.0382	0.897311	0.936716
NV2t000574002.1		16	7.71692	2.43752e+08	2.35147e+08	2.06298e+08	2.86573e+08	2.88349e+08	3.49303e+08	1.78887e+08	1.84175e+08	1.73302e+08					1.20941	1.46507	0.750302	0.77248	0.726876
NV2t000576001.1		5	6.3627	5.08439e+07	5.14812e+07	6.53292e+07	2.895e+07	2.76356e+07	2.89852e+07	6.27398e+07	6.48694e+07	4.87401e+07					0.578993	0.607268	1.31446	1.35908	1.02115
NV2t000578001.1		2	6.00297	1.52018e+07	2.07507e+07	1.40097e+07	3.67456e+07	1.65954e+07	2.60152e+07	1.74925e+07	2.8357e+07	2.6794e+07					0.739537	1.15931	0.779517	1.26367	1.19402
NV2t000581001.1		2	6.14605	1.53179e+07	1.69548e+07	2.54571e+07	5.74978e+06	5.51309e+06	4.51424e+06	1.54421e+07	1.4541e+07	1.18278e+07					0.43027	0.352314	1.20518	1.13486	0.923101
NV2t000581002.1	Coagulation factor-related-2	2	6.14605	1.53179e+07	1.69548e+07	2.54571e+07	5.74978e+06	5.51309e+06	4.51424e+06	1.54421e+07	1.4541e+07	1.18278e+07					0.43027	0.352314	1.20518	1.13486	0.923101
NV2t000593001.1	Coagulation factor-related-3
NV2t000599001.1		6	6.45259	5.21567e+07	5.5776e+07	5.68981e+07	3.0495e+07	2.81951e+07	3.51598e+07	4.88443e+07	4.93692e+07	3.88103e+07					0.641277	0.799682	1.11093	1.12287	0.882712
NV2t000599002.1	Phosphatidylinositol phosphatase PTPRQ-like-2	6	6.45259	5.21567e+07	5.5776e+07	5.68981e+07	3.0495e+07	2.81951e+07	3.51598e+07	4.88443e+07	4.93692e+07	3.88103e+07					0.641277	0.799682	1.11093	1.12287	0.882712
NV2t000600001.1	Phosphatidylinositol phosphatase PTPRQ-like-1
NV2t000601001.1	Receptor-type tyrosine-protein phosphatase-like
NV2t000605001.1		5	6.48153	3.4126e+07	3.43824e+07	3.28613e+07	3.39024e+07	3.38176e+07	3.82654e+07	2.95377e+07	2.93724e+07	2.71607e+07					1.03726	1.17368	0.905984	0.900914	0.833076
NV2t000614001.1		5	6.68362	1.14159e+08	1.04646e+08	1.00026e+08	8.69574e+07	9.28868e+07	9.99787e+07	4.69756e+07	4.79443e+07	4.66023e+07					1.12944	1.21567	0.57119	0.582968	0.56665
NV2t000625001.1		6	6.60554	2.35468e+07	1.92522e+07	1.72017e+07	8.87421e+07	1.05918e+08	6.03541e+07	2.09151e+08	2.14188e+08	4.20709e+08					0.822443	0.468643	1.62403	1.66315	3.26676
NV2t000628001.1	von Willebrand factor A and cache domain-containing protein 1-1
NV2t000633001.1		11	6.71428	8.8707e+07	7.90917e+07	6.98736e+07	1.33883e+08	1.28275e+08	1.46445e+08	1.4128e+08	1.65279e+08	1.63876e+08					1.03382	1.18026	1.13863	1.33205	1.32074
NV2t000634001.1		2	6.43783	1.86489e+07	2.42408e+07	1.70306e+07	2.48293e+07	2.15707e+07	3.00781e+07	2.77841e+07	2.45883e+07	2.50999e+07					0.907728	1.26573	1.1692	1.03471	1.05624
NV2t000637001.1		15	7.96852	6.53679e+08	9.82156e+08	3.36473e+08	2.78451e+08	1.48283e+08	3.82677e+08	1.22762e+08	1.53332e+08	1.73433e+08					0.413011	1.06587	0.341929	0.427076	0.483065
NV2t000638001.1		5	6.89439	4.41458e+07	5.24705e+07	4.0127e+07	4.71232e+07	2.95064e+07	4.86554e+07	2.6423e+07	3.54814e+07	2.8137e+07					0.754276	1.24378	0.675455	0.907016	0.71927
NV2t000639001.1		3	7.60829	4.86943e+07	4.36423e+07	4.85894e+07	5.91497e+07	5.09302e+07	5.21262e+07	9.76112e+07	1.26408e+08	1.10936e+08					0.718354	0.735223	1.37677	1.78294	1.56471
NV2t000640002.1		3	6.16891	8.8154e+07	8.30339e+07	8.27767e+07	5.19479e+07	2.84392e+07	3.85501e+07	9.67257e+07	1.87458e+08	1.38726e+08					0.321625	0.435972	1.09389	2.12001	1.56888
NV2t000650001.1	Secreted integrin-N-related protein	42	8.48896	1.05019e+09	5.33497e+08	4.27656e+08	7.759e+08	8.24874e+08	7.7701e+08	1.16558e+10	2.15687e+10	2.8565e+10					0.112179	0.10567	1.58514	2.93324	3.88472
NV2t000655001.1		16	7.1276	4.12937e+08	3.84753e+08	4.28687e+08	3.05515e+08	3.35883e+08	2.56371e+08	3.13488e+08	3.05839e+08	3.59639e+08					0.974166	0.743557	0.909214	0.88703	1.04306
NV2t000657001.1		2	6.19941	9.47169e+06	1.17852e+07	1.13856e+07	3.22746e+07	2.44496e+07	2.10229e+07	3.17482e+07	3.36608e+07	4.05227e+07					1.01722	0.874652	1.32088	1.40045	1.68594
NV2t000659001.1		8	6.41809	6.92447e+07	5.33109e+07	3.05579e+07	1.43288e+08	8.28267e+07	1.38239e+08	5.53387e+07	1.24269e+08	1.299e+08					0.901406	1.50446	0.602253	1.35243	1.4137
NV2t000662001.1		3	6.25237	1.98867e+07	1.81569e+07	1.74951e+07	1.81482e+07	1.33711e+07	1.28106e+07	7.14884e+06	1.06206e+07	1.15049e+07					0.931834	0.892775	0.498204	0.74015	0.801778
NV2t000668001.1		25	6.63173	2.59209e+08	2.52572e+08	2.35616e+08	1.90186e+08	1.73385e+08	2.44965e+08	2.62407e+08	2.95212e+08	2.23993e+08					0.730025	1.03141	1.10485	1.24297	0.943109
NV2t000671002.1		8	6.14828	4.53387e+07	4.15735e+07	3.97128e+07	6.59608e+07	5.92549e+07	6.06432e+07	4.40067e+07	5.33899e+07	5.46134e+07					1.14812	1.17502	0.852671	1.03448	1.05819
NV2t000672003.1		4	5.97761	2.2286e+07	1.68861e+07	1.73533e+07	6.83771e+07	8.9622e+07	5.5185e+07	8.53718e+07	8.5909e+07	1.35767e+08					1.39851	0.861134	1.33218	1.34057	2.11857
NV2t000680001.1		7	6.81154	1.02755e+08	1.65864e+08	9.8312e+07	9.33187e+07	4.55977e+07	1.01034e+08	4.87593e+07	6.17817e+07	4.70427e+07					0.536819	1.18947	0.574039	0.727352	0.553831
NV2t000681001.1		9	6.40731	9.08171e+07	7.12901e+07	7.5019e+07	1.83301e+08	2.46063e+08	1.88519e+08	1.09505e+08	1.03853e+08	1.28819e+08					1.84981	1.41721	0.823219	0.780725	0.968415
NV2t000684001.1		8	6.94202	2.17985e+08	1.89857e+08	2.50552e+08	8.28936e+07	1.05184e+08	9.98326e+07	7.61625e+07	6.88711e+07	5.49867e+07					0.825821	0.783804	0.597966	0.54072	0.43171
NV2t000692001.1		2	5.76418	1.4276e+07	1.21716e+07	1.29071e+07	2.13344e+07	1.49574e+07	1.99815e+07	2.16432e+07	3.61854e+07	2.55442e+07					0.752043	1.00465	1.0882	1.81937	1.28434
NV2t000694001.1		17	6.83331	2.46145e+08	2.44992e+08	2.18479e+08	1.60401e+08	1.6062e+08	1.25768e+08	1.7213e+08	1.72595e+08	2.4718e+08					0.826846	0.647433	0.886095	0.888489	1.27244
NV2t000699001.1		172	8.77291	1.14183e+10	1.39157e+10	1.12582e+10	4.30556e+09	3.59825e+09	5.82189e+09	6.8661e+09	6.73704e+09	5.14688e+09					0.468875	0.75863	0.894697	0.87788	0.670672
NV2t000702005.1	L1CAM/Neuroglian-like-2
NV2t000705001.1		2	5.82394	3.81762e+06	4.76719e+06	3.91981e+06	2.45257e+06	1.7341e+06	3.18913e+06	2.73686e+06	3.0978e+06	2.04865e+06					0.562134	1.0338	0.88719	1.0042	0.664097
NV2t000707001.1	Pikachurin-like
NV2t000708002.1		2	6.03807	2.87072e+07	3.15249e+07	2.20051e+07	1.73304e+07	1.62156e+07	2.09438e+07	2.16941e+07	2.10998e+07	2.34046e+07					0.719184	0.928885	0.96216	0.935802	1.03802
NV2t000722001.1		9	6.81594	1.4377e+08	1.44344e+08	1.2537e+08	1.39159e+08	1.3857e+08	1.60864e+08	1.16557e+08	1.16512e+08	1.15559e+08					1.03867	1.20578	0.873665	0.87333	0.86618
NV2t000729001.1		3	5.87267	1.27325e+07	1.44322e+07	1.25492e+07	2.22984e+07	2.45066e+07	1.90428e+07	1.6761e+07	1.34461e+07	1.99013e+07					1.41684	1.10095	0.969032	0.777382	1.15058
NV2t000737001.1	TSR domain-containing protein-1	4	6.14723	1.8424e+07	1.69454e+07	1.50866e+07	4.08292e+07	4.57792e+07	3.57577e+07	6.67223e+07	6.46593e+07	9.29832e+07					1.03733	0.810247	1.51189	1.46514	2.10694
NV2t000738001.1		3	5.82278	1.17153e+07	9.97714e+06	1.03326e+07	1.49571e+07	1.75387e+07	1.25242e+07	2.40253e+07	2.40431e+07	3.25123e+07					1.00141	0.715098	1.37178	1.37279	1.85636
NV2t000742001.1		4	6.50449	2.24845e+07	1.39233e+07	2.13573e+07	3.01655e+07	4.54292e+07	2.88741e+07	1.74776e+07	1.87294e+07	1.92114e+07					1.87851	1.19396	0.722705	0.774468	0.794398
NV2t000743001.1	Adhesion GPCR-related-4
NV2t000744001.1		26	7.19375	5.2433e+08	5.29932e+08	5.089e+08	3.16959e+08	3.30072e+08	3.33907e+08	3.31385e+08	3.14657e+08	3.23908e+08					0.845363	0.855184	0.848725	0.805882	0.829575
NV2t000745001.1		2	5.95435	3.61973e+07	2.31368e+07	5.15224e+07	1.67702e+08	3.82171e+08	8.2366e+07	7.30637e+07	5.0128e+07	1.0445e+08					3.54322	0.76364	0.677397	0.464752	0.968391
NV2t000746001.1		13	7.95033	5.50089e+08	4.44649e+08	5.10616e+08	6.52081e+08	8.55585e+08	6.22211e+08	6.4938e+08	6.11898e+08	7.32725e+08					1.36791	0.994789	1.03823	0.9783	1.17148
NV2t000748001.1		7	7.05683	6.69325e+07	8.09549e+07	1.00301e+08	4.68182e+07	3.93763e+07	3.59359e+07	3.88535e+07	3.81707e+07	3.37588e+07					0.736615	0.672256	0.726836	0.714061	0.631529
NV2t000750001.1		5	6.19059	3.09331e+07	2.24118e+07	3.70397e+07	6.99637e+07	1.23032e+08	5.06979e+07	6.11367e+07	4.79546e+07	7.04174e+07					2.15598	0.888421	1.07135	0.840349	1.23398
NV2t000754001.1		23	7.70851	7.9196e+08	7.13453e+08	5.86335e+08	5.14696e+08	3.90388e+08	7.3182e+08	2.39169e+08	3.49802e+08	2.27064e+08					0.773099	1.44925	0.473635	0.692725	0.449662
NV2t000756001.1		19	7.85777	5.06088e+08	5.3719e+08	4.3821e+08	1.90481e+08	1.95653e+08	1.88044e+08	2.39035e+08	2.19104e+08	2.79471e+08					0.630398	0.605881	0.770177	0.705958	0.900461
NV2t000757001.1		9	7.38894	1.38233e+08	2.22079e+08	1.41267e+08	4.31549e+08	2.83444e+08	2.91678e+08	5.44662e+08	5.15846e+08	7.8807e+08					0.759943	0.782018	1.46029	1.38304	2.1129
NV2t000769001.1		3	7.11078	1.31016e+08	1.92862e+08	2.25493e+08	2.51553e+07	2.43617e+07	2.10745e+07	9.79735e+07	6.86807e+07	6.79064e+07					0.256582	0.221961	1.03188	0.723359	0.715204
NV2t000770003.1		2	6.69173	2.53189e+07	3.23766e+07	2.35349e+07	3.25223e+07	2.10909e+07	3.86334e+07	2.15105e+07	2.59226e+07	1.94689e+07					0.789661	1.44647	0.805372	0.970564	0.728932
NV2t000771001.1		8	5.9764	4.41358e+07	5.65322e+07	3.70928e+07	5.88073e+07	4.59977e+07	5.57081e+07	4.81092e+07	4.79892e+07	6.03922e+07					0.910315	1.10249	0.952103	0.949729	1.19519
NV2t000773003.1		5	6.19032	3.30636e+07	3.02706e+07	3.13046e+07	7.55733e+07	8.1394e+07	6.04121e+07	9.44972e+07	9.57744e+07	1.24779e+08					1.16821	0.867064	1.35627	1.3746	1.7909
NV2t000780001.1		4	6.17638	2.05376e+07	1.94488e+07	2.32951e+07	3.65222e+07	3.92256e+07	2.92406e+07	4.77089e+07	4.68781e+07	5.25043e+07					1.11945	0.834489	1.36155	1.33784	1.4984
NV2t000782001.1		2	6.27157	1.27142e+07	1.35579e+07	1.59825e+07	6.69689e+06	3.68898e+06	7.16754e+06	9.40589e+06	1.60025e+07	6.98695e+06					0.360083	0.699626	0.918112	1.56201	0.681998
NV2t000788001.1	LRP-Polydom
NV2t000789002.1		3	5.96175	1.28314e+07	1.30602e+07	1.17591e+07	1.61192e+07	1.33697e+07	1.14901e+07	1.15381e+07	1.36586e+07	1.76519e+07					0.990523	0.851272	0.854828	1.01193	1.30778
NV2t000792002.1		3	6.26168	8.60343e+06	9.03629e+06	7.83311e+06	7.34177e+07	7.17625e+07	6.21027e+07	4.53598e+07	4.41551e+07	5.88624e+07					1.69459	1.46648	1.07112	1.04267	1.38996
NV2t000795002.1		3	6.07574	2.01906e+07	1.9941e+07	1.80868e+07	2.10949e+07	2.27995e+07	2.57104e+07	3.61132e+07	3.38101e+07	3.30568e+07					0.889049	1.00256	1.4082	1.3184	1.28903
NV2t000807001.1	Matrix Metalloprotease-3	3	6.57149	5.99445e+07	7.36145e+07	6.22439e+07	5.99531e+07	5.36822e+07	5.2068e+07	1.65341e+08	1.5027e+08	1.83237e+08					0.561559	0.544673	1.7296	1.57195	1.9168
NV2t000814001.1		11	7.92876	3.62633e+08	6.01105e+08	3.27928e+08	1.35989e+08	7.44375e+07	1.82347e+08	1.1233e+08	1.23723e+08	9.2582e+07					0.332793	0.815234	0.502201	0.553137	0.413913
NV2t000816001.1		2	6.29335	3.41914e+07	4.50196e+07	2.36173e+07	8.30441e+07	3.80977e+07	1.18251e+08	5.90165e+07	9.7639e+07	5.99656e+07					0.613553	1.9044	0.950444	1.57245	0.965729
NV2t000818001.1		9	6.78379	1.25103e+08	1.33933e+08	1.04337e+08	1.01124e+08	8.45815e+07	9.75601e+07	6.43606e+07	7.18299e+07	7.99408e+07					0.882313	1.0177	0.671378	0.749294	0.833904
NV2t000822001.1		10	6.76499	1.99922e+08	2.12716e+08	1.94486e+08	1.48534e+08	1.52857e+08	1.96201e+08	1.17029e+08	1.06813e+08	9.10185e+07					0.969101	1.2439	0.741956	0.677183	0.57705
NV2t000824001.1		11	6.2952	6.32037e+07	7.10058e+07	5.76259e+07	8.95552e+07	7.29469e+07	9.02952e+07	8.23085e+07	8.98881e+07	8.94817e+07					0.929509	1.15057	1.0488	1.14538	1.1402
NV2t000826001.1		4	6.06401	1.01758e+07	1.3869e+07	6.72552e+06	8.61205e+06	5.71412e+06	1.3847e+07	6.7274e+06	7.4345e+06	6.32673e+06					0.647434	1.56892	0.762243	0.842361	0.716845
NV2t000829001.1		8	6.22932	3.17695e+07	2.59535e+07	2.6182e+07	4.42277e+07	4.92526e+07	4.84444e+07	4.6826e+07	5.14391e+07	5.18423e+07					1.17912	1.15977	1.12102	1.23146	1.24111
NV2t000836001.1	Matrilin-like-1
NV2t000837002.1		2	6.12957	2.10927e+07	2.83571e+07	2.4324e+07	3.84263e+07	3.34553e+07	3.4415e+07	3.97408e+07	3.3931e+07	3.8455e+07					1.03046	1.06002	1.22406	1.04511	1.18446
NV2t000840001.1	Matrilin-like-2	2	6.12957	2.10927e+07	2.83571e+07	2.4324e+07	3.84263e+07	3.34553e+07	3.4415e+07	3.97408e+07	3.3931e+07	3.8455e+07					1.03046	1.06002	1.22406	1.04511	1.18446
NV2t000841001.1	Matrilin-like-3
NV2t000842001.1	Matrilin-like-4
NV2t000843001.1	Matrilin-like-5
NV2t000845001.1	Matrilin-like-6
NV2t000855001.1	vWFA, EGF-like and Discoidin domain-containing protein-1
NV2t000856001.1	vWFA domain-containing protein-1	3	5.91745	1.27126e+07	1.52209e+07	1.66551e+07	1.68168e+07	2.23775e+07	1.54188e+07	1.95241e+07	1.22468e+07	1.62439e+07					1.36804	0.942621	1.19359	0.748704	0.993062
NV2t000857001.1	vWFA, EGF-like and Discoidin domain-containing protein-2
NV2t000861001.1	vWFA, EGF-like and Discoidin domain-containing protein-3
NV2t000871001.1		2	6.31841	3.24279e+07	2.47178e+07	3.42992e+07	1.74458e+07	2.25806e+07	1.93347e+07	6.09684e+07	6.17582e+07	5.19796e+07					0.624325	0.534579	1.6857	1.70754	1.43717
NV2t000875001.1		11	7.62933	3.21394e+08	3.30275e+08	3.29021e+08	1.85162e+08	1.7495e+08	2.10453e+08	1.17102e+08	1.20529e+08	1.0058e+08					0.833331	1.00244	0.557787	0.574109	0.479089
NV2t000878001.1		5	6.51278	4.29959e+07	3.45954e+07	3.89276e+07	4.26229e+07	5.62369e+07	4.57476e+07	5.03469e+07	4.73946e+07	5.17793e+07					1.23252	1.00263	1.10344	1.03873	1.13483
NV2t000882001.1		3	5.67276	1.31687e+07	1.25824e+07	1.16336e+07	1.52889e+07	1.5112e+07	1.65567e+07	2.36028e+07	2.4976e+07	2.46567e+07					0.863115	0.945632	1.34807	1.4265	1.40826
NV2t000887001.1		5	6.19624	3.27526e+07	3.69123e+07	3.61311e+07	7.07615e+07	4.67486e+07	7.10903e+07	9.0965e+07	1.22096e+08	8.20284e+07					0.713736	1.08537	1.38881	1.86411	1.25237
NV2t000890002.1	SHOC2 leucine rich repeat scaffold protein-like	3	6.22601	3.40203e+07	3.84212e+07	3.53061e+07	3.43615e+07	4.55581e+07	3.61205e+07	2.57558e+07	1.71899e+07	2.3595e+07					1.41227	1.11971	0.798413	0.532876	0.73143
NV2t000891002.1		2	6.0775	1.30359e+07	1.34233e+07	1.25587e+07	6.76649e+06	6.36239e+06	7.88397e+06	5.87659e+06	6.06565e+06	5.23216e+06					0.741681	0.919055	0.68505	0.707088	0.609926
NV2t000892001.1		2	5.68743	4.34797e+07	5.63951e+07	3.82852e+07	1.81734e+07	1.19838e+07	1.98363e+07	1.57326e+07	1.83829e+07	1.63595e+07					0.451974	0.748137	0.593363	0.693321	0.617009
NV2t000893001.1	Apextrin-like-2
NV2t000895001.1		9	6.52887	7.1755e+07	6.66512e+07	5.92594e+07	7.54514e+07	7.68504e+07	8.3125e+07	6.75302e+07	7.13328e+07	7.41767e+07					1.07045	1.15785	0.940631	0.993597	1.03321
NV2t000900003.1		2	6.37308	1.55952e+07	1.33903e+07	1.86692e+07	3.49644e+07	5.81976e+07	2.26794e+07	1.11514e+07	7.79789e+06	1.43525e+07					2.6615	1.03718	0.509978	0.356615	0.656373
NV2t000903001.1	von Willebrand factor A and cache domain-containing protein 1-2
NV2t000914001.1	Vitellogenin-1	135	7.74939	3.44449e+09	3.97265e+09	3.58538e+09	2.83056e+09	3.89999e+09	3.25128e+09	1.87085e+09	1.17656e+09	1.56381e+09					1.37133	1.14323	0.657833	0.413708	0.549872
NV2t000926001.1		3	5.88166	9.5248e+06	8.97074e+06	9.83319e+06	2.70586e+07	2.11727e+07	2.53561e+07	1.68356e+07	2.28302e+07	1.73921e+07					1.19865	1.43549	0.953112	1.29249	0.984618
NV2t000934002.1		2	5.92497	6.15502e+06	7.52319e+06	7.3947e+06	4.76066e+06	5.35585e+06	4.05853e+06	7.04973e+06	5.12347e+06	6.8789e+06					0.88771	0.672683	1.16846	0.849193	1.14015
NV2t000935002.1		11	8.22084	1.03111e+09	9.86045e+08	9.65686e+08	4.33596e+08	6.28235e+08	6.12528e+08	7.50539e+08	5.41338e+08	5.66942e+08					0.867726	0.846032	1.03665	0.747703	0.783067
NV2t000936001.1		3	6.98351	1.63586e+08	2.53542e+08	2.2236e+08	9.91826e+07	4.85246e+07	5.7099e+07	9.91651e+07	1.30693e+08	1.26646e+08					0.363692	0.427957	0.743243	0.979547	0.949217
NV2t000946001.1		7	6.46063	4.58925e+07	4.16975e+07	4.69114e+07	7.9982e+07	8.58029e+07	7.71789e+07	5.06744e+07	5.19561e+07	5.13433e+07					1.45309	1.30704	0.858179	0.879884	0.869507
NV2t000954001.1		24	8.30379	2.01709e+09	1.79323e+09	2.73455e+09	1.78577e+09	2.01528e+09	1.20432e+09	1.27819e+09	1.27321e+09	1.3972e+09					1.17025	0.699332	0.742228	0.73934	0.811339
NV2t000955001.1		17	6.94653	3.51349e+08	3.91131e+08	3.71614e+08	1.7724e+08	1.6581e+08	1.98947e+08	1.95774e+08	1.87866e+08	1.64803e+08					0.676917	0.8122	0.799245	0.766962	0.672807
NV2t000958001.1		2	6.08147	1.76332e+07	1.62767e+07	1.38842e+07	5.88645e+06	6.76163e+06	7.52702e+06	1.23813e+07	1.16697e+07	1.22898e+07					0.583403	0.649441	1.06827	1.00688	1.06038
NV2t000959001.1		11	7.15967	9.04645e+07	1.1307e+08	1.80363e+08	1.69306e+08	1.67503e+08	1.01195e+08	4.23341e+08	3.42134e+08	3.55036e+08					0.776111	0.468878	1.96152	1.58525	1.64503
NV2t000961001.1		9	6.42064	1.05394e+08	1.0816e+08	8.53175e+07	5.15847e+07	4.8657e+07	6.54533e+07	5.91249e+07	6.10408e+07	5.75277e+07					0.681831	0.917197	0.828517	0.855365	0.806136
NV2t000967001.1		3	6.4992	4.59786e+07	4.34716e+07	5.63033e+07	4.49672e+07	5.33669e+07	3.36063e+07	6.95442e+07	6.19384e+07	7.59446e+07					0.990066	0.623466	1.29019	1.14909	1.40893
NV2t000968001.1		4	6.15935	4.18714e+07	4.66914e+07	3.55121e+07	4.61796e+07	4.68768e+07	5.28987e+07	5.37858e+07	4.7486e+07	5.53289e+07					0.988891	1.11593	1.13464	1.00174	1.16719
NV2t000973001.1		7	6.77694	7.80549e+07	7.95115e+07	9.10456e+07	5.3617e+07	4.74986e+07	5.8442e+07	5.5462e+07	6.14205e+07	4.35966e+07					0.75176	0.924961	0.877796	0.972101	0.690004
NV2t000975001.1		8	7.16342	5.63475e+07	5.36628e+07	5.08476e+07	2.70674e+08	3.44066e+08	2.11362e+08	4.33186e+08	3.57608e+08	6.14383e+08					1.29449	0.795212	1.62979	1.34544	2.31151
NV2t000977001.1		11	6.90651	1.43742e+08	1.19922e+08	1.36702e+08	9.00388e+07	1.08404e+08	7.60894e+07	8.31606e+07	8.274e+07	1.03412e+08					1.03328	0.725267	0.792668	0.788659	0.985703
NV2t000980001.1		2	7.29304	4.23633e+07	4.70638e+07	4.5998e+07	9.7824e+07	6.04039e+07	1.04155e+08	4.49094e+07	6.54254e+07	3.88233e+07					0.99391	1.7138	0.738958	1.07654	0.638815
NV2t000984001.1		4	5.97353	3.17689e+07	3.28141e+07	2.81792e+07	2.64376e+07	2.21386e+07	2.74714e+07	1.71837e+07	1.98544e+07	1.86325e+07					0.887595	1.1014	0.688939	0.796013	0.747027
NV2t000988003.1	Leucine-rich repeats and immunoglobulin-like domains protein-like-1
NV2t000989001.1		2	6.05597	1.00783e+07	9.77965e+06	8.51664e+06	2.78862e+07	3.05181e+07	2.18372e+07	1.35978e+07	1.27966e+07	2.05363e+07					1.76579	1.26351	0.786775	0.740414	1.18824
NV2t000997001.1	Discoidin domain repeat protein
NV2t001017001.1		4	6.48072	3.43283e+07	3.08048e+07	3.31139e+07	2.97892e+07	2.9351e+07	2.65083e+07	4.23622e+07	4.78821e+07	4.93215e+07					0.816664	0.737568	1.17869	1.33227	1.37232
NV2t001025001.1	Very low-density lipoprotein receptor-1
NV2t001026001.1		9	6.46665	7.22514e+07	8.48313e+07	9.19951e+07	1.25352e+08	1.00246e+08	9.68896e+07	7.44191e+07	7.92072e+07	7.55716e+07					1.12669	1.08897	0.836418	0.890232	0.84937
NV2t001029001.1		2	6.29099	1.90522e+07	2.63479e+07	1.78065e+07	1.15855e+07	9.36242e+06	1.38818e+07	1.47656e+07	1.32039e+07	1.31772e+07					0.605403	0.89764	0.954787	0.853803	0.852079
NV2t001036001.1		2	5.55932	7.12454e+06	7.37033e+06	7.60128e+06	8.99628e+06	9.20919e+06	8.90888e+06	7.21885e+06	6.81248e+06	6.82837e+06					1.18285	1.14428	0.927208	0.875013	0.877054
NV2t001038001.1		6	6.71667	6.44176e+07	4.24512e+07	6.63138e+07	1.39548e+08	2.16388e+08	1.21141e+08	1.50771e+08	1.47451e+08	1.68613e+08					1.74336	0.975982	1.2147	1.18796	1.35845
NV2t001044001.1	vWFA domain-containing protein-5
NV2t001047001.1	vWFA domain-containing protein-6
NV2t001050002.1		5	6.25929	3.4882e+07	2.80228e+07	2.34342e+07	2.14011e+07	2.48075e+07	2.70219e+07	1.93628e+07	2.07795e+07	2.28128e+07					1.00334	1.0929	0.783127	0.840427	0.922661
NV2t001051001.1		9	6.63735	7.34028e+07	8.71019e+07	6.8088e+07	5.27333e+07	3.99628e+07	6.62409e+07	4.06583e+07	4.51844e+07	3.48729e+07					0.70766	1.17299	0.719977	0.800125	0.617529
NV2t001052001.1		2	6.02769	9.94926e+06	1.4075e+07	1.24942e+07	4.27559e+07	2.14417e+07	2.89584e+07	1.21292e+07	1.70859e+07	1.4252e+07					1.11455	1.50527	0.630483	0.888136	0.740828
NV2t001053001.1		9	6.29011	5.3398e+07	5.38383e+07	5.62741e+07	6.21608e+07	4.66835e+07	6.45889e+07	6.32603e+07	8.34919e+07	5.77359e+07					0.776001	1.07363	1.05155	1.38785	0.95972
NV2t001054003.1		16	7.40817	1.04126e+08	1.07501e+08	1.29629e+08	1.78299e+08	1.48769e+08	1.41411e+08	3.94179e+08	4.573e+08	3.98981e+08					0.6499	0.617757	1.72198	1.99772	1.74296
NV2t001069001.1		3	7.28571	9.09519e+07	8.71167e+07	9.44584e+07	5.9313e+07	5.49257e+07	6.43562e+07	2.94476e+08	3.31787e+08	2.61167e+08					0.369303	0.432711	1.97996	2.23083	1.75601
NV2t001073001.1		15	6.68024	1.70238e+08	1.91448e+08	1.16881e+08	1.35034e+08	1.22501e+08	1.8542e+08	1.36207e+08	1.33424e+08	1.44389e+08					0.825513	1.24952	0.917874	0.899124	0.973015
NV2t001082002.1		12	7.25003	2.67622e+08	3.15176e+08	3.64598e+08	1.49293e+08	1.39023e+08	1.30162e+08	2.75629e+08	2.51172e+08	2.31913e+08					0.588918	0.551382	1.1676	1.06399	0.98241
NV2t001087001.1		2	5.88765	1.33511e+07	1.55022e+07	1.15939e+07	9.26352e+06	1.03933e+07	1.05163e+07	2.35364e+07	1.80556e+07	2.38604e+07					0.687425	0.695561	1.55672	1.19422	1.57816
NV2t001088001.1		7	7.60814	2.17814e+08	1.82833e+08	3.12507e+08	1.39469e+08	1.59199e+08	9.60486e+07	1.04544e+08	1.09041e+08	1.05742e+08					1.00392	0.605688	0.659259	0.687619	0.666816
NV2t001096001.1		5	6.50139	8.88995e+07	8.84084e+07	9.66075e+07	7.13321e+07	7.5148e+07	5.60169e+07	7.15492e+07	6.825e+07	8.37909e+07					0.966185	0.720215	0.919914	0.877497	1.07731
NV2t001099001.1		5	6.69676	3.40118e+07	4.06322e+07	3.80073e+07	1.7132e+08	9.90623e+07	1.12554e+08	8.66434e+07	1.25349e+08	1.17946e+08					1.07999	1.22708	0.944598	1.36657	1.28587
NV2t001100001.1		7	6.94231	5.1184e+07	4.75508e+07	6.48795e+07	7.45474e+07	6.88828e+07	5.13738e+07	3.59184e+07	4.18159e+07	4.10936e+07					1.299	0.968816	0.677357	0.788572	0.774951
NV2t001101001.1	CTLD protein-3
NV2t001104001.1		2	5.89105	1.34172e+07	1.52373e+07	1.28693e+07	1.23062e+07	9.27321e+06	1.26281e+07	1.06531e+07	1.24409e+07	1.0817e+07					0.761192	1.03658	0.874459	1.02121	0.887912
NV2t001107001.1		2	5.47352	5.13571e+06	5.99705e+06	5.36755e+06	1.09575e+07	9.45722e+06	9.97441e+06	8.07658e+06	8.00873e+06	8.48429e+06					1.1911	1.25624	1.01721	1.00867	1.06856
NV2t001108001.1		14	7.12176	2.85872e+08	2.46829e+08	4.08733e+08	2.8641e+08	4.05997e+08	2.0088e+08	1.55073e+08	1.2662e+08	1.54545e+08					1.609	0.796105	0.614565	0.501805	0.612476
NV2t001109001.1		9	6.32926	4.34025e+07	4.68009e+07	4.47539e+07	5.08315e+07	4.90936e+07	5.76033e+07	1.01746e+08	9.76367e+07	8.70216e+07					0.763257	0.895558	1.58185	1.51796	1.35292
NV2t001113001.1	Coagulation factor-like-2	6	6.18457	4.33795e+07	4.78426e+07	5.62331e+07	6.58006e+07	4.46881e+07	4.60779e+07	8.00748e+07	1.06839e+08	8.81587e+07					0.694521	0.71612	1.24448	1.66044	1.37012
NV2t001116001.1	Discoidin and Ig domain-containing protein	4	6.10703	2.28384e+07	2.25016e+07	2.79337e+07	2.5081e+07	2.2166e+07	2.36267e+07	7.15006e+07	8.20626e+07	6.20196e+07					0.554567	0.591109	1.78886	2.0531	1.55165
NV2t001117001.1		7	6.24802	3.53482e+07	3.87766e+07	3.9573e+07	5.28222e+07	4.01124e+07	5.36692e+07	9.7839e+07	1.17374e+08	8.59629e+07					0.642967	0.860271	1.56827	1.88141	1.37791
NV2t001120001.1	ADAMTS metalloprotease-6	2	5.81453	1.44947e+07	1.30678e+07	1.28203e+07	7.5826e+06	8.01373e+06	8.80186e+06	1.02546e+07	1.07557e+07	9.98192e+06					0.753066	0.827128	0.96365	1.01073	0.938021
NV2t001123002.1		3	6.1174	1.32006e+07	1.946e+07	1.30833e+07	1.56991e+07	1.12023e+07	1.43452e+07	2.65646e+07	2.52379e+07	2.93151e+07					0.599735	0.767997	1.42219	1.35116	1.56944
NV2t001123005.1	ADAMTS metalloprotease-5	3	6.1174	1.32006e+07	1.946e+07	1.30833e+07	1.56991e+07	1.12023e+07	1.43452e+07	2.65646e+07	2.52379e+07	2.93151e+07					0.599735	0.767997	1.42219	1.35116	1.56944
NV2t001124001.1	ADAMTS metalloprotease-8
NV2t001126001.1		17	6.61061	1.61936e+08	1.74406e+08	1.58132e+08	2.26505e+08	2.15701e+08	2.36009e+08	1.36914e+08	1.33408e+08	1.34481e+08					1.23063	1.34649	0.781128	0.761128	0.767249
NV2t001129001.1	Mucin-like-3
NV2t001136001.1		17	6.69322	1.68482e+08	1.58639e+08	1.51102e+08	1.85068e+08	1.95408e+08	2.01554e+08	1.33771e+08	1.34469e+08	1.36875e+08					1.20015	1.23791	0.821596	0.825881	0.840657
NV2t001140001.1		2	6.19877	1.64456e+07	1.367e+07	1.70585e+07	1.79356e+07	2.11424e+07	1.59195e+07	1.71531e+07	1.74948e+07	1.86198e+07					1.22415	0.921746	0.993168	1.01296	1.0781
NV2t001156001.1		3	6.26561	1.65184e+07	1.38049e+07	1.14378e+07	2.07171e+07	2.58457e+07	2.11633e+07	3.74776e+07	3.59228e+07	5.29519e+07					0.986313	0.807625	1.4302	1.37087	2.02073
NV2t001167001.1		5	6.76872	7.85724e+07	1.14193e+08	5.70787e+07	3.8661e+07	2.49994e+07	5.23961e+07	2.71364e+07	2.88569e+07	2.75462e+07					0.50061	1.04923	0.543403	0.577857	0.551609
NV2t001169001.1		45	8.23773	2.36196e+09	1.89899e+09	2.47508e+09	3.59255e+09	4.4227e+09	3.09021e+09	1.17945e+09	1.19089e+09	1.30773e+09					1.84968	1.2924	0.493275	0.498059	0.546923
NV2t001170001.1	Cysteine-rich with EGF-like domain protein 2	5	6.48527	5.33371e+07	4.07611e+07	5.85423e+07	4.18557e+07	5.21613e+07	3.51927e+07	3.93211e+07	4.12611e+07	4.2582e+07					1.1591	0.782032	0.873771	0.916881	0.946233
NV2t001171001.1	L1CAM/Neuroglian-like-1	23	7.00546	2.75437e+08	2.71501e+08	3.95916e+08	9.19657e+08	1.34273e+09	6.80286e+08	1.733e+09	1.20341e+09	1.62888e+09					1.42998	0.724495	1.84562	1.28162	1.73474
NV2t001174001.1		23	7.6835	5.83715e+08	5.30888e+08	5.3825e+08	3.30997e+08	3.52001e+08	4.15398e+08	2.54021e+08	2.62466e+08	2.19373e+08					0.908492	1.07212	0.65561	0.677406	0.566188
NV2t001179001.1		2	6.3964	1.87446e+07	1.68477e+07	1.33176e+07	1.83143e+07	1.77095e+07	2.18158e+07	2.68354e+07	3.0857e+07	3.16896e+07					0.812646	1.00107	1.23141	1.41595	1.45416
NV2t001183001.1		6	6.63509	4.61992e+07	6.58156e+07	5.63002e+07	6.5738e+07	4.60708e+07	7.37339e+07	6.7598e+07	6.76636e+07	4.9425e+07					0.769923	1.23222	1.12968	1.13078	0.825976
NV2t001184001.1		9	6.49243	5.31004e+07	6.47346e+07	5.24394e+07	3.47277e+07	2.84888e+07	4.23037e+07	4.31851e+07	4.31542e+07	3.58766e+07					0.644202	0.956591	0.976522	0.975823	0.811258
NV2t001186001.1		14	7.07066	2.04375e+08	2.17386e+08	2.18347e+08	4.29767e+08	2.94047e+08	3.00723e+08	1.98011e+08	2.71912e+08	2.64713e+08					1.10301	1.12805	0.742763	1.01998	0.992973
NV2t001188001.1		9	6.29563	5.1732e+07	5.49357e+07	3.85723e+07	6.16348e+07	5.64396e+07	4.14472e+07	6.25909e+07	6.43256e+07	1.24757e+08					0.912876	0.670383	1.01237	1.04043	2.01787
NV2t001189001.1		6	7.94774	4.77312e+08	5.67853e+08	6.24889e+08	7.99188e+07	1.0667e+08	1.14146e+08	1.44318e+08	9.08277e+07	7.71343e+07					0.420499	0.449969	0.568909	0.358049	0.304068
NV2t001191001.1		2	5.72884	1.79482e+07	2.27864e+07	1.85659e+07	1.27557e+07	8.80958e+06	1.48869e+07	1.08273e+07	1.23407e+07	8.96323e+06					0.619986	1.04768	0.761984	0.868492	0.6308
NV2t001200001.1		4	6.89753	1.01764e+08	1.12956e+08	1.32259e+08	1.02726e+08	1.10881e+08	7.76094e+07	5.03491e+07	4.19974e+07	5.12466e+07					1.27647	0.893444	0.579622	0.483476	0.589954
NV2t001209001.1		4	5.41522	1.08309e+07	9.83306e+06	8.74209e+06	4.17386e+07	5.1047e+07	6.3677e+07	3.63776e+07	3.27417e+07	2.95241e+07					1.61478	2.0143	1.15074	1.03572	0.933939
NV2t001216001.1		6	7.38187	1.25726e+08	1.34501e+08	1.34045e+08	1.99388e+08	1.77458e+08	1.55033e+08	4.72961e+08	4.9643e+08	5.70187e+08					0.647727	0.565874	1.72633	1.81199	2.0812
NV2t001217001.1		7	6.22424	6.52942e+07	6.97478e+07	6.48739e+07	5.96383e+07	5.87491e+07	5.10189e+07	4.94105e+07	4.6926e+07	5.80974e+07					1.00952	0.876688	0.849049	0.806355	0.998321
NV2t001220001.1		13	7.59858	4.75009e+08	4.06938e+08	5.01603e+08	3.91263e+08	5.19842e+08	3.46482e+08	5.5241e+08	4.85018e+08	5.90378e+08					1.09596	0.73047	1.16462	1.02254	1.24467
NV2t001222001.1		14	6.92776	2.23314e+08	2.58552e+08	2.72869e+08	3.71189e+08	3.75282e+08	3.29491e+08	3.47297e+08	2.96506e+08	3.20003e+08					1.20864	1.06116	1.11851	0.954929	1.0306
NV2t001226001.1		11	7.59721	5.07903e+08	4.63111e+08	7.05253e+08	1.78292e+08	1.86702e+08	2.02204e+08	1.36893e+08	1.4328e+08	8.68761e+07					0.643674	0.697117	0.471952	0.493972	0.299514
NV2t001227001.1		3	6.42554	5.18928e+07	5.75092e+07	6.28085e+07	1.075e+08	1.0001e+08	1.00297e+08	6.23039e+07	6.03918e+07	5.51397e+07					1.36822	1.37215	0.852371	0.826211	0.754358
NV2t001231001.1		4	7.0595	7.71967e+07	5.40222e+07	5.54347e+07	7.3554e+07	1.01468e+08	6.62348e+07	4.82489e+07	4.99477e+07	7.45699e+07					1.52031	0.992402	0.722918	0.748371	1.11729
NV2t001232002.1		4	6.34791	2.4684e+07	2.09016e+07	2.72293e+07	8.31582e+07	1.13223e+08	4.86018e+07	5.82055e+07	5.04538e+07	9.02266e+07					1.97221	0.846583	1.01387	0.878843	1.57164
NV2t001237001.1		5	6.83685	1.34867e+08	1.43211e+08	1.33398e+08	1.69251e+08	2.17205e+08	2.37368e+08	2.19132e+08	1.60703e+08	1.57875e+08					1.24274	1.35811	1.25377	0.919463	0.903282
NV2t001244001.1	Fibrinogen-related protein-1
NV2t001253001.1		11	7.37704	2.64824e+08	3.44343e+08	2.74115e+08	9.45109e+08	7.95191e+08	5.0164e+08	2.06889e+09	1.8899e+09	3.76348e+09					0.659758	0.416203	1.71652	1.56802	3.1225
NV2t001255001.1		2	6.60892	1.22775e+07	7.9152e+06	1.42839e+07	1.04793e+08	1.82567e+08	5.61692e+07	4.53914e+08	4.03887e+08	7.27465e+08					0.836919	0.25749	2.08083	1.85149	3.33483
NV2t001257001.1		2	6.20591	3.25278e+07	2.99079e+07	3.40693e+07	4.65679e+07	5.62115e+07	3.68437e+07	7.69606e+07	6.92987e+07	9.28159e+07					1.0646	0.697793	1.45758	1.31247	1.75786
NV2t001272001.1	Hepatocyte growth factor activator-like
NV2t001273001.1		6	6.39375	2.34512e+07	1.87946e+07	2.51525e+07	5.24532e+07	5.7177e+07	4.60664e+07	1.67362e+08	1.91454e+08	1.7757e+08					0.677558	0.545896	1.98328	2.26877	2.10424
NV2t001276001.1		7	6.60776	8.54317e+07	7.70259e+07	1.1435e+08	8.29485e+07	8.73178e+07	6.45967e+07	7.11236e+07	7.48906e+07	6.81921e+07					1.08264	0.800921	0.881847	0.928553	0.8455
NV2t001284001.1	Coagulation factor-related-4
NV2t001286001.1		2	5.96253	8.05011e+06	1.07741e+07	9.24542e+06	8.17087e+06	8.00031e+06	6.41361e+06	3.17621e+07	2.42224e+07	3.52119e+07					0.507595	0.406924	2.01521	1.53684	2.23409
NV2t001288001.1	Suppressor of lurcher protein-like-3	4	7.04591	1.40185e+08	1.30802e+08	2.11075e+08	9.55524e+07	9.17581e+07	6.71791e+07	1.8357e+08	2.04744e+08	1.73306e+08					0.636143	0.465741	1.27266	1.41946	1.2015
NV2t001288002.1		4	7.04591	1.40185e+08	1.30802e+08	2.11075e+08	9.55524e+07	9.17581e+07	6.71791e+07	1.8357e+08	2.04744e+08	1.73306e+08					0.636143	0.465741	1.27266	1.41946	1.2015
NV2t001292001.1		2	6.5352	2.82549e+07	2.88635e+07	2.45871e+07	3.27346e+07	3.41038e+07	3.47558e+07	3.12855e+07	2.93778e+07	3.38415e+07					1.10486	1.12598	1.01355	0.951748	1.09636
NV2t001293001.1		6	6.41718	3.496e+07	4.05197e+07	3.03013e+07	2.2945e+07	2.09826e+07	2.6917e+07	2.14538e+07	2.02285e+07	2.1087e+07					0.788837	1.01194	0.80655	0.760486	0.79276
NV2t001294001.1		2	5.69713	7.59778e+06	6.91622e+06	8.11014e+06	1.37655e+07	1.12973e+07	8.70519e+06	9.98705e+06	1.33598e+07	1.4786e+07					1.07565	0.828847	0.950896	1.27203	1.40781
NV2t001305001.1		2	6.44544	7.42269e+06	8.21666e+06	7.70974e+06	1.01366e+07	1.02934e+07	7.22612e+06	3.88251e+07	3.45173e+07	5.24036e+07					0.524132	0.367947	1.97694	1.75759	2.66834
NV2t001313001.1		13	7.38213	2.45231e+08	2.40338e+08	2.53064e+08	1.50925e+08	1.47479e+08	1.58076e+08	2.19097e+08	2.28636e+08	2.02589e+08					0.71924	0.770919	1.06852	1.11504	0.988007
NV2t001314001.1	Sushi repeat-containing protein SRPX-like
NV2t001325001.1		6	6.22464	2.97581e+07	2.87176e+07	2.22353e+07	2.24715e+07	1.90898e+07	2.80435e+07	2.80008e+07	3.41337e+07	3.00103e+07					0.708604	1.04096	1.03937	1.26702	1.11397
NV2t001329001.1		2	5.82002	6.87908e+06	5.25462e+06	4.50374e+06	1.82684e+07	1.51634e+07	1.85468e+07	9.33386e+06	1.47122e+07	1.40342e+07					1.27906	1.56445	0.787326	1.241	1.18381
NV2t001337001.1	Very low-density lipoprotein receptor-2
NV2t001345001.1		8	7.06308	1.45331e+08	1.25441e+08	1.37395e+08	1.48059e+08	2.03655e+08	1.50251e+08	1.19517e+08	1.00604e+08	1.245e+08					1.46076	1.07771	0.85726	0.721604	0.893006
NV2t001355004.1		10	6.68347	9.03208e+07	8.74228e+07	8.24054e+07	1.24695e+08	1.62344e+08	1.53439e+08	1.089e+08	8.63632e+07	9.69417e+07					1.47164	1.39092	0.987176	0.782881	0.878775
NV2t001358001.1		33	7.36803	4.4527e+08	5.79391e+08	4.54945e+08	4.24685e+08	4.10073e+08	4.97849e+08	6.90325e+08	5.49083e+08	5.76007e+08					0.797527	0.968237	1.34257	1.06788	1.12024
NV2t001364001.1		6	6.58233	8.1356e+07	7.73385e+07	7.70545e+07	7.63037e+07	8.27986e+07	8.60815e+07	8.23112e+07	7.97446e+07	7.69885e+07					1.03502	1.07605	1.02892	0.99684	0.962387
NV2t001369002.1		8	6.58012	1.52297e+08	1.73595e+08	1.70845e+08	1.00596e+08	9.93677e+07	1.21401e+08	7.77856e+07	6.90417e+07	5.74227e+07					0.874757	1.06872	0.684765	0.60779	0.505506
NV2t001385001.1		2	6.81846	3.26905e+07	3.72858e+07	3.97203e+07	1.37021e+07	9.9966e+06	1.24575e+07	1.18277e+07	1.42049e+07	1.07005e+07					0.492751	0.614055	0.583009	0.700188	0.527447
NV2t001387001.1		5	6.82868	3.02832e+07	2.58879e+07	2.66097e+07	3.02388e+07	3.49796e+07	2.48946e+07	2.90096e+07	2.93171e+07	4.00776e+07					1.16041	0.825849	0.962359	0.972562	1.32953
NV2t001390002.1		29	7.12657	3.43598e+08	3.92058e+08	3.67041e+08	2.01164e+08	2.14661e+08	2.0896e+08	2.77551e+08	2.27806e+08	2.49978e+08					0.778127	0.757463	1.0061	0.825778	0.906151
NV2t001400001.1		2	6.38466	9.49907e+06	8.53598e+06	1.17724e+07	3.247e+07	5.00748e+07	3.86626e+07	2.69842e+07	1.94592e+07	1.82749e+07					2.08903	1.61294	1.12573	0.811805	0.762397
NV2t001400002.1		2	6.51566	3.17645e+07	2.876e+07	2.95823e+07	1.23666e+07	1.40387e+07	1.38386e+07	1.75833e+07	1.70963e+07	1.68618e+07					0.694631	0.684735	0.87002	0.845925	0.834321
NV2t001403001.1		3	6.35751	1.82615e+07	1.77765e+07	1.87156e+07	2.788e+07	2.60791e+07	2.19109e+07	2.93632e+07	3.22269e+07	3.64341e+07					1.02652	0.862452	1.15579	1.26851	1.43411
NV2t001405001.1		8	7.30603	1.56371e+08	1.84677e+08	1.66187e+08	1.71195e+08	1.30847e+08	1.601e+08	3.74722e+08	4.14862e+08	3.76795e+08					0.551384	0.674657	1.57906	1.74821	1.5878
NV2t001414001.1		20	6.94313	3.8173e+08	4.04374e+08	3.73016e+08	2.1819e+08	2.36389e+08	2.45244e+08	2.54041e+08	2.21212e+08	2.31157e+08					0.829322	0.860387	0.891248	0.776077	0.810966
NV2t001419001.1		3	6.39313	4.38862e+07	3.11978e+07	4.61269e+07	4.5845e+07	7.36566e+07	4.27591e+07	4.22041e+07	3.69287e+07	4.30259e+07					1.63427	0.948725	0.936411	0.819363	0.954646
NV2t001426001.1		2	6.51689	5.65088e+07	5.5185e+07	4.55568e+07	2.81806e+07	3.12725e+07	3.77249e+07	1.54504e+07	1.42478e+07	1.43075e+07					0.943098	1.13768	0.465944	0.429677	0.431478
NV2t001428001.1		3	6.05981	2.16858e+07	2.56579e+07	1.92379e+07	3.84929e+07	2.49268e+07	3.90029e+07	2.75854e+07	3.5981e+07	3.06705e+07					0.852228	1.33348	0.943123	1.23016	1.0486
NV2t001431001.1		3	5.97188	2.6056e+07	3.24085e+07	2.40421e+07	2.9283e+07	2.5485e+07	2.56432e+07	2.53764e+07	2.34281e+07	3.13869e+07					0.943464	0.949323	0.939445	0.867317	1.16195
NV2t001434002.1		5	6.29922	3.81164e+07	3.76701e+07	4.58659e+07	7.38895e+07	7.46953e+07	5.23346e+07	5.29956e+07	5.30115e+07	6.21434e+07					1.36993	0.959833	0.971956	0.972248	1.13973
NV2t001436001.1		3	5.8703	8.99888e+06	1.88217e+07	3.22045e+07	2.79844e+07	6.80222e+07	4.14039e+07	1.46682e+08	2.88335e+07	2.76862e+07					1.52806	0.930107	3.2951	0.647722	0.621948
NV2t001444001.1		2	6.52139	2.51604e+07	1.41196e+07	2.08107e+07	1.65812e+07	1.78911e+07	1.90905e+07	8.68005e+06	1.43258e+07	9.1094e+06					1.10463	1.17868	0.53592	0.8845	0.562429
NV2t001450001.1		2	6.04475	4.87631e+06	5.10349e+06	5.18779e+06	1.89268e+07	3.24016e+07	2.02606e+07	1.80017e+07	1.00409e+07	1.57974e+07					2.23294	1.39625	1.24058	0.691966	1.08867
NV2t001453001.1		24	7.70351	9.95145e+08	7.94377e+08	1.13522e+09	4.64724e+08	6.25239e+08	5.40338e+08	3.71707e+08	3.45888e+08	2.80076e+08					1.01341	0.875795	0.602474	0.560625	0.453955
NV2t001461001.1		7	6.2096	3.08338e+07	2.77655e+07	3.5868e+07	6.0603e+07	6.64502e+07	6.28131e+07	4.94336e+07	5.00344e+07	4.09756e+07					1.40792	1.33086	1.04738	1.06011	0.868175
NV2t001470001.1		48	7.30297	9.99394e+08	1.05455e+09	9.98487e+08	5.41996e+08	4.64264e+08	6.82426e+08	7.66151e+08	8.47114e+08	6.08679e+08					0.600077	0.88206	0.990277	1.09493	0.786739
NV2t001471001.1		4	6.65102	1.02708e+08	1.24838e+08	1.22705e+08	2.53533e+07	2.16263e+07	3.43418e+07	4.07291e+07	3.92592e+07	2.51535e+07					0.362645	0.575867	0.682974	0.658326	0.421792
NV2t001514001.1		3	7.06373	1.43536e+07	1.73292e+07	1.70544e+07	2.74613e+07	2.65567e+07	2.23708e+07	3.57894e+07	3.06344e+07	3.69536e+07					1.04598	0.881113	1.40963	1.20659	1.45548
NV2t001515001.1		30	7.89561	1.07412e+09	1.03809e+09	1.04308e+09	4.64395e+08	5.27427e+08	5.17241e+08	5.57834e+08	5.07895e+08	5.15433e+08					0.76004	0.745362	0.803859	0.731895	0.742757
NV2t001545001.1		2	6.3528	2.39934e+07	2.989e+07	3.11674e+07	1.93646e+07	1.70131e+07	1.95808e+07	3.68585e+07	3.36554e+07	2.80444e+07					0.639143	0.735606	1.38469	1.26436	1.05356
NV2t001547001.1		12	6.77505	1.3473e+08	1.26476e+08	1.10641e+08	1.08044e+08	1.17877e+08	1.22841e+08	1.49263e+08	1.45648e+08	1.59771e+08					0.902664	0.940674	1.14301	1.11533	1.22347
NV2t001548001.1		3	6.34209	4.79303e+07	3.85061e+07	4.63697e+07	4.8336e+07	6.56604e+07	4.73633e+07	4.25057e+07	3.89243e+07	4.48116e+07					1.40564	1.01394	0.909954	0.833285	0.959319
NV2t001549001.1		16	7.08208	1.89262e+08	1.88536e+08	1.63712e+08	1.12135e+08	1.06988e+08	1.14053e+08	1.04911e+08	1.10312e+08	1.19173e+08					0.796382	0.848973	0.780924	0.821126	0.887082
NV2t001588001.1		25	6.88667	2.58654e+08	3.04239e+08	2.43672e+08	2.34263e+08	2.06508e+08	2.59033e+08	2.42398e+08	2.33629e+08	2.32559e+08					0.839103	1.05252	0.984935	0.9493	0.944953
NV2t001590001.1		12	7.20557	2.32313e+08	2.55506e+08	2.66959e+08	1.08516e+08	1.00034e+08	9.7774e+07	2.80768e+08	2.76753e+08	2.71011e+08					0.476446	0.465681	1.33725	1.31812	1.29078
NV2t001591001.1		5	7.24581	1.46157e+08	1.97664e+08	2.09437e+08	8.0632e+07	7.26033e+07	8.36576e+07	1.04928e+08	8.61117e+07	7.05342e+07					0.621293	0.715888	0.897909	0.736889	0.603587
NV2t001600001.1		12	6.74938	1.35142e+08	1.30853e+08	1.25648e+08	1.23732e+08	1.34689e+08	1.42532e+08	1.66645e+08	1.58006e+08	1.55502e+08					0.952429	1.00789	1.1784	1.11731	1.0996
NV2t001607001.1		8	6.85474	1.0985e+08	9.5654e+07	1.17198e+08	1.49437e+08	1.6349e+08	1.37997e+08	2.34369e+08	2.45862e+08	2.37744e+08					0.986463	0.832643	1.41413	1.48348	1.4345
NV2t001610001.1		35	7.41748	2.41462e+08	2.38811e+08	2.27242e+08	1.13243e+09	9.78912e+08	7.49443e+08	5.52676e+09	6.46039e+09	8.86835e+09					0.360722	0.276164	2.03657	2.38061	3.26793
NV2t001610003.1	Coadhesin-like-2	35	7.41748	2.41462e+08	2.38811e+08	2.27242e+08	1.13243e+09	9.78912e+08	7.49443e+08	5.52676e+09	6.46039e+09	8.86835e+09					0.360722	0.276164	2.03657	2.38061	3.26793
NV2t001613001.1		14	7.07334	2.58283e+08	2.11473e+08	2.69431e+08	1.26011e+08	1.4013e+08	1.37945e+08	9.0961e+07	9.98391e+07	7.96063e+07					0.89212	0.878206	0.579092	0.635613	0.506803
NV2t001615001.1		9	7.268	2.65835e+08	2.73068e+08	3.16666e+08	3.83962e+07	4.51952e+07	4.67072e+07	4.62119e+07	3.81958e+07	3.18718e+07					0.369059	0.381405	0.377361	0.311902	0.260261
NV2t001629001.1		7	6.70408	7.23233e+07	8.83045e+07	7.5425e+07	1.79538e+08	1.1456e+08	1.80164e+08	1.34709e+08	1.72799e+08	1.28643e+08					0.89932	1.41433	1.05749	1.35651	1.00988
NV2t001634001.1	Adhesion GPCR-related-2
NV2t001635001.1	Coagulation factor-like-4
NV2t001638002.1		5	7.24168	1.41553e+08	1.23622e+08	1.49742e+08	4.41908e+08	4.16063e+08	2.57172e+08	4.31873e+08	5.24903e+08	7.01097e+08					1.17461	0.726035	1.21924	1.48188	1.9793
NV2t001639003.1		19	6.88885	2.40419e+08	2.34197e+08	2.42334e+08	2.75357e+08	3.10533e+08	3.01605e+08	5.02539e+08	4.57163e+08	4.54906e+08					0.925719	0.899104	1.4981	1.36283	1.3561
NV2t001647001.1	Matrix Metalloprotease-6	9	7.78121	1.78169e+08	3.20207e+08	2.05271e+08	1.30611e+08	7.5181e+07	1.23482e+08	2.19977e+08	2.12508e+08	2.01834e+08					0.405838	0.666575	1.18747	1.14715	1.08953
NV2t001648001.1		2	6.75483	4.53772e+06	5.00417e+06	4.83798e+06	4.97012e+06	2.99002e+06	5.20043e+06	2.44684e+06	3.68578e+06	2.19203e+06					0.750317	1.305	0.614011	0.924911	0.550069
NV2t001649001.1		2	6.12422	8.7246e+06	8.78087e+06	9.57657e+06	1.0848e+07	1.09104e+07	1.14875e+07	8.7422e+06	8.63105e+06	7.51653e+06					1.15226	1.21322	0.923281	0.911542	0.793835
NV2t001657001.1		3	6.18915	4.28612e+07	2.44588e+07	3.83053e+07	4.51196e+07	6.88714e+07	2.87038e+07	3.0794e+07	3.53304e+07	5.413e+07					1.68173	0.7009	0.75194	0.862713	1.32177
NV2t001658001.1		4	6.64389	2.36483e+07	1.95052e+07	1.90839e+07	2.36038e+07	3.22301e+07	2.93047e+07	5.68444e+07	5.04409e+07	5.67027e+07					0.931613	0.847054	1.64309	1.458	1.639
NV2t001659001.1		2	6.41429	4.26106e+07	3.77584e+07	4.69252e+07	3.33065e+07	4.10298e+07	3.54536e+07	3.61935e+07	3.31351e+07	3.08566e+07					1.09488	0.946075	0.965819	0.884208	0.823407
NV2t001679001.1		28	7.17097	5.31025e+08	5.11219e+08	5.30487e+08	3.63e+08	3.65147e+08	3.62476e+08	6.16058e+08	6.35762e+08	6.17205e+08					0.725076	0.719773	1.22331	1.26244	1.22559
NV2t001680001.1		10	7.09619	1.76065e+08	1.65994e+08	2.11954e+08	1.75916e+08	1.69859e+08	1.98175e+08	1.36648e+08	1.50012e+08	1.007e+08					1.02923	1.2008	0.827989	0.908965	0.610172
NV2t001681001.1		2	5.54107	8.91409e+06	1.00794e+07	1.01141e+07	1.65832e+07	1.60509e+07	1.28761e+07	2.15043e+07	1.96364e+07	2.43949e+07					1.03071	0.826844	1.38091	1.26096	1.56653
NV2t001683001.1		2	5.65146	5.89398e+06	7.66017e+06	7.58658e+06	1.48298e+07	1.28679e+07	1.10475e+07	9.95803e+06	8.82465e+06	1.03788e+07					1.30055	1.11656	1.00646	0.891905	1.04898
NV2t001685001.1		3	6.17266	2.18151e+07	2.23943e+07	2.40845e+07	3.33635e+07	4.20188e+07	3.51425e+07	2.61363e+07	2.0203e+07	2.24617e+07					1.52722	1.27729	0.94995	0.734301	0.816393
NV2t001686001.1		13	6.22863	6.8101e+07	6.74659e+07	7.88559e+07	5.96594e+07	5.03699e+07	6.15746e+07	7.01165e+07	8.37766e+07	5.86348e+07					0.757374	0.92585	1.05429	1.25968	0.881646
NV2t001691001.1		3	6.22396	7.8311e+07	7.04883e+07	4.78671e+07	1.98351e+07	2.1226e+07	1.66716e+07	2.54188e+07	2.63726e+07	4.94467e+07					0.537161	0.421902	0.643266	0.667402	1.25133
NV2t001692002.1		2	6.22512	2.32393e+07	2.45087e+07	2.3265e+07	1.54696e+07	1.12139e+07	1.70303e+07	7.81459e+06	1.02154e+07	7.08634e+06					0.721703	1.09603	0.502929	0.657441	0.456061
NV2t001693001.1		3	5.78305	1.22104e+07	1.23055e+07	1.01648e+07	1.1919e+07	8.90756e+06	9.46713e+06	5.38031e+06	7.13914e+06	8.13205e+06					0.936258	0.995073	0.565515	0.750382	0.854746
NV2t001696001.1	Stabilin 2-like
NV2t001698001.1		5	6.47885	5.56357e+07	5.7171e+07	5.05885e+07	4.88582e+07	4.48344e+07	4.73718e+07	4.80702e+07	5.09455e+07	5.44922e+07					0.881087	0.930952	0.944679	1.00118	1.07088
NV2t001707001.1		8	7.50321	2.9505e+08	3.48729e+08	4.18476e+08	7.21038e+07	6.82667e+07	7.56869e+07	1.10196e+08	9.84123e+07	7.3972e+07					0.393621	0.436405	0.635384	0.567438	0.426518
NV2t001708004.1		19	7.88426	7.10446e+08	6.96318e+08	6.9464e+08	5.54814e+08	6.37895e+08	5.11191e+08	7.99081e+08	7.0866e+08	8.86472e+08					0.926049	0.742109	1.16005	1.02878	1.28691
NV2t001709001.1		8	7.6547	4.08416e+08	3.71895e+08	3.84076e+08	1.52957e+08	1.76972e+08	1.56958e+08	3.22305e+08	3.05732e+08	3.33793e+08					0.609522	0.540591	1.11008	1.053	1.14964
NV2t001719001.1	Laminin subunit beta-1-1	35	8.68152	2.86825e+09	3.23563e+09	2.39316e+09	6.70332e+08	6.00657e+08	1.5134e+09	5.49675e+09	5.43441e+09	2.91626e+09					0.215128	0.54203	1.96868	1.94636	1.04447
NV2t001722001.1		10	7.57133	1.83852e+08	1.7337e+08	1.80297e+08	4.00041e+08	4.03158e+08	4.25204e+08	8.89362e+08	9.35251e+08	8.52714e+08					0.816614	0.861269	1.80144	1.89439	1.72721
NV2t001725001.1		8	6.15238	3.80638e+07	3.55606e+07	3.14006e+07	4.86443e+07	5.04013e+07	5.28496e+07	3.77532e+07	3.89774e+07	4.20975e+07					1.20722	1.26586	0.904272	0.933595	1.00833
NV2t001727003.1		5	6.66203	8.48333e+07	5.85521e+07	8.65337e+07	1.84662e+08	2.99e+08	1.39356e+08	1.30887e+08	1.17045e+08	1.69929e+08					2.11757	0.98694	0.92696	0.82893	1.20347
NV2t001728001.1		4	6.36635	1.84194e+07	2.65699e+07	2.57844e+07	2.16417e+07	1.55766e+07	1.96307e+07	3.46098e+07	3.33142e+07	2.72403e+07					0.629254	0.793028	1.39814	1.34581	1.10044
NV2t001729001.1		10	7.276	2.36499e+08	2.3958e+08	2.32036e+08	1.02277e+08	9.20548e+07	1.15909e+08	8.02988e+07	8.80127e+07	7.21747e+07					0.65814	0.828681	0.574091	0.629241	0.516008
NV2t001734001.1		3	5.64041	2.08017e+06	3.01079e+06	1.67172e+06	3.2579e+06	1.29298e+06	3.19228e+06	3.36376e+06	5.85213e+06	4.26908e+06					0.415737	1.02643	1.08156	1.88166	1.37266
NV2t001741001.1		9	8.13396	4.50134e+08	4.23544e+08	3.39829e+08	2.5213e+08	2.70803e+08	1.55609e+08	1.48188e+08	1.46539e+08	3.17851e+08					0.973089	0.559157	0.53249	0.526565	1.14215
NV2t001747001.1		7	6.89264	8.21305e+07	5.96327e+07	9.52254e+07	1.78448e+08	2.61643e+08	1.32317e+08	1.0583e+08	9.93477e+07	1.23025e+08					2.06996	1.04682	0.837261	0.785978	0.973301
NV2t001750001.1		2	6.54903	3.85815e+07	2.65506e+07	2.11354e+07	1.65671e+07	1.74721e+07	1.82557e+07	2.22378e+07	3.06213e+07	3.68168e+07					0.688968	0.719869	0.876891	1.20747	1.45178
NV2t001755002.1		11	6.96021	3.04551e+08	2.72819e+08	2.91746e+08	2.80498e+08	3.39288e+08	2.65007e+08	2.28725e+08	2.10953e+08	2.5257e+08					1.24832	0.975023	0.841536	0.776148	0.929265
NV2t001758001.1		11	8.1017	6.70596e+08	5.84209e+08	4.92749e+08	5.19769e+08	6.52438e+08	7.73661e+08	6.64868e+08	6.07611e+08	6.07533e+08					1.05356	1.24931	1.07363	0.981172	0.981047
NV2t001764001.1		22	6.64545	2.85532e+08	3.35536e+08	2.32696e+08	1.89595e+08	1.61477e+08	2.10252e+08	1.56495e+08	1.56263e+08	1.73058e+08					0.764528	0.995457	0.740941	0.739843	0.819357
NV2t001765001.1		37	6.80887	3.97968e+08	4.50365e+08	3.06601e+08	3.37117e+08	3.12604e+08	3.90714e+08	3.98866e+08	3.7986e+08	4.46441e+08					0.822513	1.02803	1.04948	0.999475	1.17466
NV2t001770001.1		2	5.59795	1.92022e+06	1.75989e+06	1.75409e+06	4.22379e+06	4.07474e+06	4.92991e+06	7.34473e+06	8.30176e+06	6.88458e+06					0.890248	1.07709	1.60468	1.81377	1.50414
NV2t001772001.1		6	6.3853	4.25354e+07	6.35537e+07	3.52766e+07	4.09034e+07	1.40684e+07	4.39435e+07	2.28815e+07	4.44973e+07	2.56656e+07					0.379856	1.1865	0.617815	1.20146	0.692987
NV2t001783001.1		5	6.45443	7.138e+07	8.49745e+07	6.77457e+07	8.65009e+07	4.52743e+07	7.37907e+07	4.47282e+07	7.17404e+07	5.5212e+07					0.677593	1.10438	0.66942	1.0737	0.826325
NV2t001784002.1	Thrombospondin type-1, Discoidin and EGF-like domain-containing protein
NV2t001787003.1		6	6.92862	1.16939e+08	8.91179e+07	9.46226e+07	7.3049e+07	8.86058e+07	8.15438e+07	1.03221e+08	1.11594e+08	1.14208e+08					0.913566	0.840753	1.06425	1.15058	1.17753
NV2t001789001.1		10	6.54678	9.1376e+07	8.19018e+07	8.7552e+07	7.51663e+07	7.7083e+07	7.4e+07	6.36384e+07	6.91908e+07	6.74242e+07					1.00933	0.968964	0.833288	0.905991	0.882859
NV2t001795001.1		4	6.17701	4.27577e+07	4.1015e+07	4.30783e+07	4.51189e+07	7.01368e+07	6.70698e+07	6.87953e+07	4.61072e+07	4.59077e+07					1.34308	1.28435	1.31739	0.882929	0.879108
NV2t001797001.1		7	6.44814	5.80748e+07	6.4207e+07	5.25654e+07	9.31902e+07	8.55286e+07	8.43779e+07	3.02582e+08	2.98012e+08	3.68987e+08					0.546887	0.53953	1.93477	1.90555	2.35938
NV2t001800001.1	Cytokine receptor-like-13, partial
NV2t001808001.1		8	6.43592	5.57704e+07	5.22635e+07	4.75153e+07	8.78703e+07	8.46729e+07	8.85753e+07	6.01475e+07	6.6565e+07	6.99932e+07					1.2424	1.29966	0.882541	0.976705	1.02701
NV2t001811001.1		4	6.10677	2.03515e+07	2.46796e+07	3.28181e+07	4.19458e+07	3.56875e+07	2.87475e+07	3.71013e+07	3.59373e+07	3.35506e+07					1.10442	0.88965	1.14818	1.11215	1.03829
NV2t001812003.1		9	6.86667	1.2214e+08	7.69985e+07	9.0913e+07	1.55712e+08	2.83736e+08	2.19485e+08	7.59065e+07	6.60372e+07	7.2305e+07					2.19528	1.69817	0.587293	0.510934	0.559428
NV2t001814001.1		6	7.47954	1.59604e+08	1.64699e+08	1.4376e+08	1.64943e+08	1.59641e+08	1.5451e+08	1.84188e+08	1.84302e+08	2.18164e+08					0.936731	0.906623	1.08077	1.08144	1.28013
NV2t001818002.1		4	6.34305	3.00809e+07	2.77872e+07	2.86051e+07	3.86495e+07	4.67543e+07	4.41112e+07	4.54697e+07	4.06645e+07	4.18701e+07					1.22325	1.1541	1.18964	1.06392	1.09546
NV2t001820001.1		5	6.79277	3.59413e+07	4.56902e+07	5.22567e+07	8.27942e+07	1.02686e+08	9.32164e+07	9.28643e+07	5.88617e+07	5.66954e+07					1.48819	1.35095	1.34585	0.853059	0.821663
NV2t001823001.1		2	6.28396	1.27743e+07	1.43527e+07	1.25845e+07	1.80809e+07	1.24583e+07	1.6113e+07	1.37978e+07	1.78116e+07	1.5707e+07					0.838752	1.08481	0.928936	1.19916	1.05747
NV2t001824001.1		8	7.0707	8.66059e+07	8.1468e+07	8.79116e+07	7.34676e+07	8.2771e+07	8.15168e+07	6.7016e+07	6.31949e+07	5.94659e+07					1.09002	1.0735	0.88254	0.832221	0.783112
NV2t001826001.1		4	6.34495	1.25124e+07	1.29113e+07	1.05873e+07	1.7599e+07	1.69435e+07	2.18277e+07	1.4087e+07	1.4171e+07	1.34151e+07					1.13753	1.46544	0.945759	0.951399	0.900647
NV2t001830001.1		3	6.55612	4.61804e+07	3.09834e+07	3.9913e+07	5.54674e+07	1.14588e+08	4.57613e+07	4.58522e+07	3.30609e+07	6.42661e+07					2.16624	0.865104	0.866822	0.625006	1.21493
NV2t001831007.1		2	7.22601	3.07719e+07	2.23775e+07	3.0932e+07	4.96827e+07	9.82037e+07	3.53485e+07	4.24347e+07	2.95032e+07	5.92982e+07					2.21761	0.79823	0.958249	0.666232	1.33906
NV2t001832002.1		2	6.62032	4.08964e+07	2.43243e+07	3.58716e+07	5.78059e+07	1.05474e+08	5.67423e+07	5.02403e+07	4.62645e+07	5.83165e+07					1.99453	1.073	0.950049	0.874866	1.10277
NV2t001834001.1		2	6.22202	1.67883e+07	1.7183e+07	1.48569e+07	1.29595e+07	1.55007e+07	1.77186e+07	1.24076e+07	1.01288e+07	1.02486e+07					1.09167	1.24787	0.873825	0.713339	0.721776
NV2t001838001.1		19	6.52995	1.8103e+08	1.81713e+08	1.19256e+08	1.4628e+08	1.37698e+08	1.55629e+08	9.64596e+07	1.02022e+08	1.37547e+08					0.985406	1.11373	0.690293	0.730101	0.984324
NV2t001839001.1		7	6.97775	1.04157e+08	1.26678e+08	1.62e+08	1.21379e+08	1.15885e+08	1.13598e+08	2.10414e+08	1.81095e+08	1.44464e+08					0.815025	0.798944	1.47986	1.27365	1.01602
NV2t001840001.1		5	6.63013	7.03224e+07	6.41016e+07	6.66334e+07	4.16708e+07	4.82077e+07	4.14613e+07	5.87197e+07	5.56481e+07	6.22464e+07					0.852377	0.733091	1.03824	0.983933	1.1006
NV2t001845001.1		6	6.678	7.18834e+07	6.13369e+07	8.44468e+07	7.32612e+07	8.13019e+07	6.51447e+07	6.74161e+07	7.11491e+07	6.44975e+07					1.14253	0.915471	0.947391	0.999851	0.906377
NV2t001847001.1		3	6.36829	2.20174e+07	1.78231e+07	1.91218e+07	3.07645e+07	3.51165e+07	3.33473e+07	3.93795e+07	4.2591e+07	4.18058e+07					1.12087	1.0644	1.25694	1.35945	1.33438
NV2t001849001.1		5	6.04618	2.26546e+07	2.43857e+07	2.7545e+07	3.32743e+07	3.71488e+07	2.29408e+07	2.17782e+07	1.81106e+07	2.5964e+07					1.43001	0.883087	0.838331	0.697151	0.999463
NV2t001854001.1		2	6.20031	5.54757e+06	7.00951e+06	5.42495e+06	3.14724e+07	2.58075e+07	3.16184e+07	5.392e+07	5.20085e+07	5.48511e+07					0.867771	1.06316	1.81305	1.74877	1.84435
NV2t001863001.1		4	6.15468	3.26345e+07	3.23683e+07	2.85481e+07	4.164e+07	4.30425e+07	4.58915e+07	3.27939e+07	3.1966e+07	3.39947e+07					1.19978	1.27919	0.914103	0.891026	0.947574
NV2t001865001.1		2	5.66686	6.39411e+06	6.75015e+06	6.1672e+06	1.45624e+07	8.18652e+06	1.15877e+07	7.15175e+06	1.20431e+07	9.31279e+06					0.896817	1.26941	0.78346	1.3193	1.0202
NV2t001867001.1		6	6.4666	6.32825e+07	5.94442e+07	8.30523e+07	1.22453e+08	1.30506e+08	1.08983e+08	7.03171e+07	7.01939e+07	6.01647e+07					1.52858	1.27649	0.823604	0.822161	0.704692
NV2t001870001.1		5	6.71035	6.1218e+07	6.73903e+07	8.46882e+07	8.02511e+07	7.29213e+07	5.92037e+07	5.40631e+07	5.40137e+07	5.29416e+07					1.11863	0.908201	0.829342	0.828586	0.812139
NV2t001872001.1		2	6.13159	1.9251e+07	1.8355e+07	1.9411e+07	1.78019e+07	1.91106e+07	1.80932e+07	1.41112e+07	1.37779e+07	1.37613e+07					1.11923	1.05965	0.826434	0.806912	0.805942
NV2t001874001.1		2	6.17935	2.30246e+07	4.39398e+07	2.89259e+07	1.02367e+08	5.82821e+07	1.24135e+08	7.89446e+07	7.26121e+07	5.17885e+07					0.898152	1.91298	1.21657	1.11898	0.798083
NV2t001875001.1		6	6.83827	1.27815e+08	9.10482e+07	6.37738e+07	1.37064e+08	1.53746e+08	1.096e+08	3.51229e+08	4.39284e+08	8.79795e+08					0.587974	0.419146	1.34321	1.67997	3.36463
NV2t001891001.1		3	6.32772	3.37499e+07	3.15155e+07	3.1051e+07	3.04955e+07	2.46346e+07	3.26631e+07	1.65176e+07	2.18831e+07	1.67517e+07					0.926647	1.22865	0.621319	0.823149	0.630128
NV2t001895001.1		11	6.79757	1.39671e+08	1.37909e+08	1.3987e+08	1.33897e+08	1.46088e+08	1.48081e+08	1.02654e+08	9.52294e+07	9.26333e+07					1.15736	1.17314	0.813252	0.754436	0.733869
NV2t001897001.1		18	7.13637	1.42586e+08	1.5369e+08	1.54819e+08	2.98645e+08	3.92681e+08	2.83771e+08	3.6601e+08	2.58086e+08	3.54544e+08					1.46959	1.062	1.36978	0.965877	1.32687
NV2t001900001.1		3	6.22615	2.13897e+07	1.5691e+07	1.70837e+07	1.92473e+07	2.60333e+07	1.9988e+07	2.13832e+07	2.15373e+07	2.57653e+07					1.24549	0.956267	1.02302	1.03039	1.23267
NV2t001905001.1		21	7.00583	2.38972e+08	2.63048e+08	2.24156e+08	2.20647e+08	1.96909e+08	2.36823e+08	1.71817e+08	1.74799e+08	1.7056e+08					0.93384	1.12313	0.814844	0.828987	0.808882
NV2t001907001.1		20	6.68551	2.13439e+08	2.34515e+08	2.18651e+08	1.42761e+08	1.49187e+08	1.59601e+08	2.39775e+08	2.08696e+08	2.09238e+08					0.756074	0.808852	1.21517	1.05766	1.06041
NV2t001908001.1		13	7.00818	1.46684e+08	1.52744e+08	1.40425e+08	1.08877e+08	1.00521e+08	1.1614e+08	3.03061e+08	3.15032e+08	2.96595e+08					0.53848	0.62215	1.62346	1.68759	1.58882
NV2t001914001.1		3	6.10001	3.94144e+07	3.67982e+07	4.3146e+07	4.93349e+07	8.14245e+07	5.69595e+07	3.3533e+07	2.17484e+07	2.65164e+07					1.88446	1.31825	0.776077	0.503337	0.613686
NV2t001915001.1		6	6.5996	5.11495e+07	5.25387e+07	4.72159e+07	7.97311e+07	1.0251e+08	8.5423e+07	1.32895e+08	1.00567e+08	1.34293e+08					1.1733	0.977724	1.52107	1.15106	1.53707
NV2t001916001.1		8	6.62579	7.01299e+07	6.8847e+07	6.38715e+07	7.89374e+07	7.12321e+07	7.21883e+07	7.1308e+07	8.04431e+07	8.55635e+07					0.967651	0.980641	0.968682	1.09278	1.16234
NV2t001922001.1	Vitellogenin-2	52	8.17556	1.09496e+09	2.3601e+08	3.05978e+08	2.81976e+10	5.77216e+10	2.27704e+10	1.74717e+08	3.95733e+08	7.73789e+08					4.65202	1.83516	0.0140811	0.0318937	0.0623628
NV2t001922005.1		52	8.17556	1.09496e+09	2.3601e+08	3.05978e+08	2.81976e+10	5.77216e+10	2.27704e+10	1.74717e+08	3.95733e+08	7.73789e+08					4.65202	1.83516	0.0140811	0.0318937	0.0623628
NV2t001925001.1		10	7.13131	1.3394e+08	1.11793e+08	1.15873e+08	4.10734e+08	5.50285e+08	3.12533e+08	6.96967e+08	6.22884e+08	1.05815e+09					1.23408	0.700892	1.56303	1.39689	2.37303
NV2t001926001.1		3	6.14322	2.11245e+07	2.45758e+07	2.49448e+07	4.36938e+07	3.12952e+07	3.68486e+07	3.46697e+07	4.1581e+07	3.47931e+07					0.959563	1.12984	1.06303	1.27494	1.06681
NV2t001929001.1		14	8.16802	7.96541e+08	7.25084e+08	9.36061e+08	3.80554e+08	4.32005e+08	3.64958e+08	6.13305e+08	5.93129e+08	5.43867e+08					0.721947	0.609901	1.02493	0.99121	0.908885
NV2t001930002.1		10	6.98686	1.33644e+08	1.20998e+08	1.72711e+08	1.0447e+08	1.0231e+08	7.71746e+07	6.45016e+07	7.27011e+07	6.75235e+07					1.00519	0.758238	0.633727	0.714286	0.663417
NV2t001931001.1		5	6.99674	6.21679e+07	6.44837e+07	7.8414e+07	8.8281e+07	1.13473e+08	8.69738e+07	1.04931e+08	7.86544e+07	8.43908e+07					1.34063	1.02756	1.23972	0.92927	0.997043
NV2t001938001.1		19	7.21279	3.34434e+08	4.39876e+08	3.31968e+08	2.39054e+08	1.71007e+08	2.58961e+08	2.33093e+08	2.4758e+08	2.16642e+08					0.622445	0.942585	0.848427	0.901159	0.788549
NV2t001953001.1		4	6.82426	2.27785e+07	7.8976e+06	1.05747e+07	7.01555e+07	2.28038e+08	1.12244e+08	7.77546e+07	6.89502e+07	1.04621e+08					2.91935	1.43695	0.995416	0.882701	1.33936
NV2t001961002.1		28	7.36402	7.18925e+08	1.01158e+09	4.87678e+08	2.24468e+08	1.81464e+08	3.78258e+08	1.93869e+08	1.70326e+08	1.69497e+08					0.461862	0.962745	0.493435	0.433515	0.431404
NV2t001974001.1		14	7.09628	2.85097e+08	3.35893e+08	3.40194e+08	9.00085e+07	9.28563e+07	1.16913e+08	1.32605e+08	1.09031e+08	8.55036e+07					0.52623	0.662564	0.751491	0.617894	0.484561
NV2t001985001.1	Fibrinogen-related protein-2
NV2t001991002.1		8	6.64778	9.04049e+07	8.92816e+07	8.1502e+07	8.01869e+07	9.24893e+07	8.99593e+07	1.23313e+08	1.08188e+08	1.21851e+08					0.948959	0.923	1.26522	1.11003	1.25022
NV2t001994001.1	von Willebrand factor A and cache domain-containing protein 1-3	3	6.65534	2.73326e+07	3.56197e+07	2.78234e+07	2.19551e+07	1.83287e+07	2.42576e+07	1.43801e+07	1.32094e+07	1.27779e+07					0.842979	1.11567	0.661376	0.607534	0.587688
NV2t001995002.1		17	7.22179	4.15284e+08	4.93873e+08	3.79952e+08	3.85014e+08	3.27562e+08	4.03891e+08	3.09826e+08	3.06024e+08	3.22615e+08					0.881587	1.08701	0.833851	0.823619	0.868272
NV2t001997001.1		11	7.83822	6.24438e+08	6.38473e+08	7.9836e+08	1.20518e+08	1.07212e+08	1.4719e+08	1.60868e+08	1.76746e+08	1.0296e+08					0.335413	0.460486	0.503277	0.552953	0.322113
NV2t002003001.1		3	7.018	1.85349e+07	1.75879e+07	1.68921e+07	2.94852e+07	2.22696e+07	2.41866e+07	1.31237e+07	1.83e+07	1.75441e+07					1.12647	1.22344	0.663842	0.925674	0.887441
NV2t002011001.1		7	6.85295	1.47085e+08	1.24537e+08	1.27833e+08	4.84159e+08	6.16431e+08	5.25393e+08	5.33198e+08	4.94298e+08	5.65009e+08					1.53343	1.30697	1.32638	1.22962	1.40552
NV2t002020001.1		5	6.46671	4.12002e+07	3.65473e+07	3.58514e+07	2.66404e+07	2.65422e+07	2.77182e+07	2.15897e+07	2.44129e+07	2.38317e+07					0.903705	0.943744	0.735083	0.831207	0.811417
NV2t002039001.1		23	7.44539	3.19784e+08	2.96859e+08	2.89622e+08	3.43523e+08	3.41002e+08	3.74563e+08	3.61239e+08	3.91765e+08	3.65587e+08					0.995162	1.0931	1.05422	1.1433	1.06691
NV2t002040001.1		4	6.92605	5.58099e+07	5.96272e+07	7.29187e+07	3.84676e+07	3.324e+07	4.28257e+07	3.09444e+07	3.34972e+07	2.1261e+07					0.769856	0.991867	0.716689	0.775815	0.492417
NV2t002042001.1		4	7.59864	1.02247e+08	1.09504e+08	1.4044e+08	5.95571e+07	5.7135e+07	4.73934e+07	7.55464e+07	7.34838e+07	6.9076e+07					0.700201	0.580816	0.925836	0.900559	0.84654
NV2t002043001.1		2	6.17357	8.9062e+06	5.12205e+06	6.26301e+06	5.69131e+07	6.90909e+07	4.99185e+07	1.70121e+07	2.43515e+07	2.7565e+07					2.34522	1.69444	0.57746	0.826587	0.935666
NV2t002045001.1		8	7.10601	1.38481e+08	1.47392e+08	1.57184e+08	4.2585e+07	5.40139e+07	4.85271e+07	8.18372e+07	6.0582e+07	6.32329e+07					0.612375	0.550169	0.927817	0.68684	0.716894
NV2t002046001.1	SAM and EGF-like domain-containing protein	14	7.4438	1.99675e+08	2.02683e+08	2.60265e+08	1.17348e+08	8.77679e+07	1.07046e+08	1.68879e+08	2.22304e+08	1.41947e+08					0.523843	0.638903	1.00796	1.32682	0.847214
NV2t002047001.1		2	6.44054	2.91509e+07	2.25182e+07	2.96857e+07	3.65564e+07	7.7903e+07	4.50268e+07	3.87692e+07	2.35364e+07	3.08904e+07					2.09895	1.21316	1.04456	0.634145	0.832284
NV2t002048001.1		2	6.28845	1.94981e+07	2.17125e+07	2.25628e+07	3.77159e+07	3.60897e+07	2.44692e+07	2.06935e+07	1.94081e+07	2.75471e+07					1.41407	0.958754	0.810813	0.76045	1.07935
NV2t002051001.1		4	7.15036	1.14007e+08	1.31397e+08	1.14614e+08	1.20532e+08	1.17353e+08	1.20132e+08	6.78079e+07	6.03891e+07	6.76323e+07					1.15573	1.1831	0.667791	0.594729	0.666062
NV2t002060001.1		9	7.01966	1.97808e+08	1.75809e+08	2.13889e+08	1.87553e+08	2.19729e+08	1.71235e+08	1.32004e+08	1.26693e+08	1.33633e+08					1.26901	0.988939	0.762366	0.731693	0.771774
NV2t002064001.1		3	6.51318	3.10093e+07	2.52915e+07	3.36457e+07	3.718e+07	3.76398e+07	2.92387e+07	2.87709e+07	3.48224e+07	3.36982e+07					1.16293	0.903369	0.888917	1.07589	1.04115
NV2t002067001.1		2	6.60317	2.17466e+07	1.95341e+07	1.97093e+07	1.86421e+07	1.60649e+07	1.76309e+07	1.43408e+07	1.85146e+07	1.67207e+07					0.887543	0.97406	0.792289	1.02288	0.923772
NV2t002068001.1		40	8.06609	2.70523e+09	2.40011e+09	2.58071e+09	1.12303e+09	1.08376e+09	1.27004e+09	7.95968e+08	9.29078e+08	7.37348e+08					0.715863	0.838908	0.525767	0.613691	0.487046
NV2t002069001.1		6	6.62502	3.8319e+07	3.97804e+07	3.31901e+07	1.08108e+08	8.33798e+07	1.15715e+08	9.06587e+07	1.13156e+08	9.77289e+07					1.04219	1.44637	1.13318	1.41438	1.22155
NV2t002078001.1		2	6.06571	1.09468e+07	7.82743e+06	7.7902e+06	2.69212e+07	4.76472e+07	4.86884e+07	2.11806e+07	1.67259e+07	1.6447e+07					2.10029	2.14618	0.933638	0.737276	0.72498
NV2t002090001.1		3	6.36175	2.06538e+07	1.47746e+07	1.53607e+07	9.60393e+06	1.06931e+07	1.32171e+07	1.06354e+07	1.33447e+07	1.03848e+07					0.810985	1.00241	0.80661	1.01209	0.787598
NV2t002091001.1		25	7.52003	6.8277e+08	7.49696e+08	8.24533e+08	3.54274e+08	3.97977e+08	3.80973e+08	3.78624e+08	3.06764e+08	2.91379e+08					0.820197	0.785153	0.780313	0.632216	0.600509
NV2t002093001.1		4	5.94158	1.44269e+07	1.42531e+07	1.25116e+07	3.4068e+07	5.81352e+07	4.93261e+07	2.65558e+07	1.57419e+07	2.11363e+07					2.12556	1.80348	0.970943	0.57556	0.772794
NV2t002096001.1		20	8.09208	8.71154e+08	6.17725e+08	6.93893e+08	3.55608e+08	4.93777e+08	4.23126e+08	2.70392e+08	2.74448e+08	2.85126e+08					1.03704	0.888661	0.567885	0.576404	0.59883
NV2t002115001.1		14	7.42206	3.42263e+08	3.18057e+08	3.39192e+08	1.1933e+08	1.30648e+08	1.47928e+08	1.21092e+08	1.18944e+08	9.85076e+07					0.677338	0.766925	0.627796	0.616661	0.510707
NV2t002117001.1		4	6.59063	3.80797e+07	3.24473e+07	3.45986e+07	3.75929e+07	4.57031e+07	4.84291e+07	4.24367e+07	4.09395e+07	3.62339e+07					1.15392	1.22275	1.07145	1.03365	0.914842
NV2t002120001.1		5	6.81195	4.49789e+07	4.84116e+07	5.19689e+07	2.2305e+07	2.18749e+07	2.04783e+07	4.36961e+07	4.137e+07	4.11677e+07					0.585496	0.548116	1.16956	1.1073	1.10188
NV2t002123001.1		4	6.43852	3.54472e+07	3.00602e+07	3.30895e+07	1.20507e+07	1.07079e+07	1.37245e+07	1.61289e+07	2.1391e+07	1.51618e+07					0.513261	0.65786	0.773109	1.02534	0.726753
NV2t002125001.1		16	7.1844	1.80634e+08	1.60861e+08	1.84673e+08	1.60896e+08	1.62593e+08	1.54267e+08	5.24193e+08	5.82118e+08	5.34441e+08					0.553314	0.52498	1.78386	1.98099	1.81874
NV2t002128001.1		13	6.82568	1.94287e+08	1.80291e+08	1.98805e+08	8.94308e+07	9.31221e+07	1.08397e+08	8.27879e+07	8.56244e+07	6.67105e+07					0.762286	0.887322	0.677692	0.700911	0.546084
NV2t002132001.1	Fibrinogen-related protein-17
NV2t002137001.1		3	5.82803	2.08217e+07	2.00279e+07	2.13416e+07	1.33899e+07	1.77111e+07	1.71504e+07	2.33618e+07	1.83503e+07	1.77844e+07					0.937984	0.908286	1.23724	0.971834	0.941864
NV2t002138001.1		2	6.25167	9.42948e+06	7.86972e+06	8.67172e+06	9.31884e+06	1.36366e+07	1.08159e+07	1.8099e+07	1.48103e+07	1.69463e+07					1.11981	0.888185	1.48626	1.2162	1.3916
NV2t002143001.1		3	6.03377	2.29538e+07	2.70372e+07	2.41133e+07	3.85505e+07	3.78519e+07	4.09801e+07	5.32179e+07	4.59852e+07	4.76267e+07					1.00695	1.09016	1.41572	1.22331	1.26698
NV2t002144001.1		3	5.81259	2.41722e+07	2.11627e+07	2.1743e+07	1.81751e+07	1.84763e+07	2.13502e+07	1.52331e+07	1.71048e+07	1.44078e+07					0.967768	1.1183	0.797893	0.895931	0.754664
NV2t002145001.1		6	7.15149	1.09545e+08	8.41448e+07	9.2974e+07	5.2797e+07	6.10647e+07	5.08055e+07	9.84199e+07	1.10711e+08	1.20434e+08					0.703784	0.585545	1.13431	1.27597	1.38803
NV2t002146001.1	Heterokaryon incompatibility protein Het-C-like	15	7.21429	2.36586e+08	2.77097e+08	3.00662e+08	1.54063e+08	1.6014e+08	1.85764e+08	1.57842e+08	1.29569e+08	1.02946e+08					0.84548	0.980761	0.833344	0.684075	0.543513
NV2t002151002.1		9	6.83262	7.52031e+07	7.52753e+07	6.6871e+07	1.86196e+08	1.88912e+08	1.93379e+08	1.70566e+08	1.67846e+08	1.84582e+08					1.29903	1.32974	1.17288	1.15417	1.26926
NV2t002152001.1		14	6.4163	1.0177e+08	9.8379e+07	9.52295e+07	1.21248e+08	1.42982e+08	1.56974e+08	1.33249e+08	1.16815e+08	1.09926e+08					1.19531	1.31228	1.11394	0.97656	0.918964
NV2t002156001.1		13	6.79018	9.06278e+07	9.23969e+07	9.69254e+07	4.79046e+08	6.53189e+08	5.27212e+08	2.38043e+08	1.71129e+08	2.0212e+08					2.30475	1.86025	0.839924	0.603821	0.713173
NV2t002165001.1		18	8.71919	3.0941e+09	2.30979e+09	3.45516e+09	1.52577e+09	1.8535e+09	1.41402e+09	1.29119e+09	1.4229e+09	1.24689e+09					0.947093	0.722531	0.659767	0.72707	0.637133
NV2t002168001.1		6	6.61586	1.04344e+08	8.13334e+07	9.61327e+07	1.42331e+08	1.83458e+08	1.15465e+08	1.42785e+08	1.42026e+08	1.90926e+08					1.37731	0.866854	1.07196	1.06626	1.43338
NV2t002171001.1		3	6.87243	6.84403e+07	5.74744e+07	6.91267e+07	8.97612e+07	1.17652e+08	7.03237e+07	1.45201e+08	1.31832e+08	1.83384e+08					1.13467	0.678222	1.40036	1.27143	1.7686
NV2t002189003.1		9	7.26273	1.67417e+08	2.48953e+08	1.83316e+08	1.04611e+08	7.98122e+07	8.13092e+07	2.07163e+08	1.82486e+08	2.43271e+08					0.479405	0.488397	1.24436	1.09613	1.46124
NV2t002213001.1		2	6.28887	4.04256e+07	3.91575e+07	4.67927e+07	3.59852e+07	2.8474e+07	3.21453e+07	3.19841e+07	4.17039e+07	3.09142e+07					0.782294	0.883161	0.878732	1.14577	0.849336
NV2t002216004.1	Mucin-like-4	9	6.45086	6.7085e+07	6.59414e+07	7.34832e+07	7.89282e+07	6.94313e+07	6.60954e+07	7.45974e+07	8.62171e+07	8.12757e+07					0.942429	0.897148	1.01255	1.17027	1.1032
NV2t002217001.1		27	7.21248	6.52452e+08	6.7953e+08	6.0618e+08	4.46284e+08	4.13982e+08	4.79532e+08	4.58224e+08	4.73994e+08	4.58729e+08					0.79801	0.924368	0.883293	0.913693	0.884268
NV2t002218001.1		3	6.38611	4.84777e+07	5.44699e+07	4.17732e+07	3.85918e+07	3.48109e+07	4.08365e+07	3.74975e+07	3.69738e+07	4.10992e+07					0.83651	0.981304	0.901069	0.888483	0.987617
NV2t002225001.1		8	6.81803	9.22512e+07	9.35262e+07	9.21709e+07	3.71433e+07	3.33959e+07	4.46112e+07	3.61975e+07	3.96855e+07	3.01462e+07					0.602176	0.804405	0.652694	0.715587	0.54358
NV2t002228001.1		3	6.18647	1.10695e+07	8.88269e+06	1.10622e+07	4.86679e+07	6.05411e+07	3.98683e+07	1.26066e+08	1.26211e+08	1.539e+08					0.929386	0.612031	1.93528	1.93751	2.36256
NV2t002229001.1	NvHedgeling	7	6.44415	2.47774e+07	2.12103e+07	2.51216e+07	9.45373e+07	9.76252e+07	7.17063e+07	2.8001e+08	3.16556e+08	3.63887e+08					0.678251	0.49818	1.94537	2.19927	2.5281
NV2t002243001.1		8	6.79973	7.17586e+07	5.87335e+07	6.57467e+07	1.0156e+08	1.3978e+08	1.09124e+08	5.9579e+07	5.28549e+07	6.0483e+07					1.74817	1.36477	0.745132	0.661036	0.756438
NV2t002244001.1		4	6.60569	4.0876e+07	2.77874e+07	2.77614e+07	4.00795e+07	5.25779e+07	6.38463e+07	4.55991e+07	5.11e+07	4.2122e+07					1.20792	1.4668	1.04759	1.17397	0.967704
NV2t002249001.1		2	5.84694	3.09972e+06	2.86488e+06	3.62138e+06	1.27947e+07	1.41614e+07	1.02599e+07	1.26451e+07	1.23534e+07	1.34895e+07					1.49434	1.08265	1.33434	1.30356	1.42345
NV2t002261001.1		10	7.17761	2.33426e+08	1.82592e+08	2.03169e+08	2.10298e+08	2.31449e+08	2.20328e+08	2.08328e+08	2.41836e+08	2.2832e+08					1.06292	1.01184	0.956734	1.11062	1.04854
NV2t002265001.1		2	6.18748	2.97063e+07	4.09815e+07	2.37717e+07	2.17329e+07	1.903e+07	2.80257e+07	2.52186e+07	2.08634e+07	2.44235e+07					0.732695	1.07905	0.970968	0.803285	0.940356
NV2t002268001.1		4	6.95801	1.19644e+08	9.40559e+07	1.19874e+08	2.46137e+08	4.42096e+08	1.86693e+08	2.2046e+08	1.56034e+08	2.89925e+08					2.12215	0.896163	1.05826	0.748997	1.3917
NV2t002269001.1		7	6.74678	8.13285e+07	9.32783e+07	6.50279e+07	9.50692e+07	6.45929e+07	5.49617e+07	3.66702e+07	4.70281e+07	7.92822e+07					0.941833	0.801399	0.534691	0.685719	1.15602
NV2t002272001.1		3	6.26256	9.1679e+06	9.18941e+06	1.04805e+07	4.57739e+07	4.65029e+07	3.75454e+07	1.38668e+08	1.36089e+08	1.47798e+08					0.720088	0.581382	2.14725	2.10731	2.28862
NV2t002273001.1		5	6.49912	5.36596e+07	5.30405e+07	5.47696e+07	4.33006e+07	5.72875e+07	4.96335e+07	6.87738e+07	5.2556e+07	5.87473e+07					1.04844	0.908358	1.25865	0.961842	1.07515
NV2t002306001.1		29	7.28759	4.24377e+08	4.42754e+08	4.1529e+08	5.35626e+08	5.24728e+08	6.77289e+08	4.74712e+08	4.64165e+08	3.83405e+08					1.08756	1.40376	0.983895	0.962034	0.794649
NV2t002361001.1		10	7.27813	7.61297e+07	7.97673e+07	2.09588e+08	3.89749e+08	5.86285e+08	7.88431e+07	6.81158e+08	4.31895e+08	1.22235e+09					1.40493	0.188933	1.63227	1.03496	2.92913
NV2t002361003.1	Transforming growth factor-beta-induced protein ig-h3-2
NV2t002367001.1		2	6.39245	2.76645e+07	2.09155e+07	2.23315e+07	2.80258e+07	3.73975e+07	3.0762e+07	2.79572e+07	2.76943e+07	3.15341e+07					1.32364	1.08878	0.98951	0.980203	1.11611
NV2t002371001.1		3	5.99126	3.57729e+07	3.9175e+07	4.07572e+07	2.9448e+07	2.71919e+07	2.71038e+07	3.20838e+07	3.17082e+07	3.05774e+07					0.832921	0.830221	0.982764	0.971261	0.936622
NV2t002372001.1		10	6.49909	1.00906e+08	1.46688e+08	1.18554e+08	3.45457e+08	1.81171e+08	1.88794e+08	1.30002e+08	1.70414e+08	2.02347e+08					1.02917	1.07247	0.738492	0.968057	1.14946
NV2t002374001.1		3	6.39117	3.04055e+07	2.65692e+07	4.72037e+07	4.49658e+07	8.59094e+07	2.54658e+07	2.79054e+07	1.67044e+07	3.17197e+07					2.29535	0.680401	0.745583	0.44631	0.847494
NV2t002375001.1		13	7.16855	2.67225e+08	2.62996e+08	2.22266e+08	2.39942e+08	2.1639e+08	2.85026e+08	7.96711e+08	8.97062e+08	8.05867e+08					0.487671	0.642355	1.79552	2.02168	1.81616
NV2t002377001.1		7	7.52035	1.73481e+08	2.51433e+08	2.42122e+08	2.07155e+08	1.22097e+08	1.72234e+08	6.97789e+07	8.16334e+07	6.00975e+07					0.796268	1.12324	0.455069	0.532379	0.391931
NV2t002379001.1		9	6.55657	9.96769e+07	9.50067e+07	8.28327e+07	7.53651e+07	6.59104e+07	9.65523e+07	6.64865e+07	7.97106e+07	6.24128e+07					0.81938	1.20031	0.826543	0.990941	0.775899
NV2t002399001.1		4	6.86358	4.08463e+07	7.05577e+07	4.74215e+07	5.48907e+07	3.00108e+07	5.02905e+07	3.98816e+07	4.22015e+07	3.74716e+07					0.653083	1.0944	0.867889	0.918374	0.815442
NV2t002407001.1		10	6.25252	6.18585e+07	6.13321e+07	5.32938e+07	9.12012e+07	8.40919e+07	7.26295e+07	7.32746e+07	8.01008e+07	1.06734e+08					1.10564	0.95493	0.963412	1.05316	1.40334
NV2t002409001.1		2	6.61029	5.78432e+07	7.44112e+07	5.87398e+07	1.39128e+08	8.22388e+07	1.40779e+08	5.1373e+07	6.75172e+07	4.99657e+07					1.02514	1.75487	0.640387	0.841631	0.622845
NV2t002412001.1		3	5.65706	1.53853e+07	1.4781e+07	1.40302e+07	2.09098e+07	2.14555e+07	1.9121e+07	2.1142e+07	2.14332e+07	2.53377e+07					1.11235	0.99132	1.0961	1.11119	1.31362
NV2t002425001.1		7	6.32455	5.22138e+07	5.22513e+07	3.71211e+07	7.18043e+07	6.25528e+07	5.87001e+07	1.08424e+08	1.24292e+08	1.86441e+08					0.746848	0.700848	1.29453	1.48399	2.22601
NV2t002430001.1		2	6.37874	1.18754e+07	8.80977e+06	1.33671e+07	4.40886e+07	6.70982e+07	3.0223e+07	2.14424e+07	1.898e+07	2.77722e+07					2.47842	1.11635	0.792021	0.701069	1.02583
NV2t002432001.1		3	6.01304	1.70069e+07	1.74392e+07	2.18078e+07	1.17415e+07	1.05319e+07	8.34217e+06	1.11553e+07	1.21206e+07	1.22372e+07					0.774518	0.613482	0.820361	0.891345	0.89992
NV2t002433001.1	Astacin metalloprotease-9	9	6.97349	1.71601e+08	1.31761e+08	1.16793e+08	1.52729e+08	1.97396e+08	1.9819e+08	6.53149e+07	6.5774e+07	7.39084e+07					1.51394	1.52003	0.500938	0.504459	0.566846
NV2t002440001.1		11	6.50494	5.18636e+07	4.81561e+07	3.97196e+07	6.22706e+07	6.2089e+07	8.586e+07	8.274e+07	8.93143e+07	7.83077e+07					0.930838	1.28721	1.24044	1.339	1.17399
NV2t002441001.1		4	5.85918	1.38977e+07	1.23516e+07	1.13233e+07	1.19931e+07	1.38719e+07	1.69921e+07	1.57373e+07	1.52993e+07	1.36246e+07					0.99805	1.22254	1.13226	1.10075	0.980258
NV2t002443001.1		4	6.16782	4.02268e+07	3.4726e+07	3.46607e+07	3.23599e+07	2.8663e+07	3.77465e+07	2.99564e+07	3.91528e+07	2.97877e+07					0.839518	1.10557	0.8774	1.14676	0.87246
NV2t002451001.1		2	5.98012	8.37905e+06	7.34657e+06	5.90291e+06	7.50587e+06	7.41556e+06	1.09381e+07	8.54018e+06	9.85281e+06	8.31371e+06					0.899525	1.32681	1.03594	1.19517	1.00847
NV2t002454001.1		2	6.20145	6.57081e+06	6.59668e+06	6.87532e+06	2.3421e+07	2.27867e+07	2.73219e+07	5.41899e+07	5.54448e+07	4.43688e+07					0.828355	0.99322	1.96994	2.01556	1.61292
NV2t002460001.1		2	5.87728	2.44711e+07	2.68376e+07	2.29971e+07	3.57467e+07	2.86847e+07	3.59669e+07	2.05212e+07	2.33037e+07	2.16898e+07					1.0747	1.34753	0.768845	0.873092	0.812626
NV2t002484001.1		2	6.12277	1.25688e+07	1.25369e+07	1.47968e+07	1.70993e+07	1.68132e+07	1.47688e+07	1.15196e+07	1.1738e+07	1.13223e+07					1.2286	1.07921	0.841777	0.857734	0.827359
NV2t002485002.1		22	7.60843	5.97564e+08	6.25556e+08	6.00837e+08	5.24683e+08	5.26225e+08	5.82951e+08	4.84331e+08	4.61012e+08	4.33285e+08					0.979237	1.0848	0.901278	0.857883	0.806288
NV2t002486001.1	Astacin metalloprotease-5
NV2t002503001.1		53	8.14521	1.97541e+09	2.12077e+09	1.93742e+09	8.32212e+08	6.89538e+08	1.38743e+09	3.08906e+09	3.4705e+09	1.88808e+09					0.356854	0.718031	1.59867	1.79607	0.977133
NV2t002510001.1		2	5.92483	7.12738e+06	8.17789e+06	8.17599e+06	1.15746e+07	1.60149e+07	1.22901e+07	8.55338e+06	5.38436e+06	7.01805e+06					1.70944	1.31185	0.912993	0.57473	0.749111
NV2t002511001.1		5	6.16033	4.42714e+07	3.9886e+07	3.60305e+07	3.97797e+07	4.66939e+07	4.22892e+07	7.88318e+07	7.44958e+07	9.10594e+07					0.85184	0.771486	1.43814	1.35903	1.6612
NV2t002514001.1		4	6.52757	3.94141e+07	4.06121e+07	4.12056e+07	5.90708e+07	7.24883e+07	5.56056e+07	4.53219e+07	3.58209e+07	4.60254e+07					1.49781	1.14897	0.936479	0.74016	0.951016
NV2t002515001.1		14	7.60898	2.79642e+08	3.29479e+08	3.04664e+08	2.45811e+08	2.18614e+08	3.55511e+08	1.62908e+08	1.55369e+08	1.03326e+08					0.91287	1.48451	0.680256	0.648775	0.43146
NV2t002517001.1		8	6.82523	9.16699e+07	8.23975e+07	7.37435e+07	9.00202e+07	1.0387e+08	1.49898e+08	5.35394e+08	5.15895e+08	3.99447e+08					0.457726	0.660559	2.35933	2.27341	1.76025
NV2t002530001.1		7	6.74878	7.40183e+07	8.13243e+07	8.30961e+07	8.04082e+07	6.03376e+07	7.21923e+07	1.11621e+08	1.35301e+08	1.10676e+08					0.671268	0.803153	1.2418	1.50525	1.23129
NV2t002534001.1		5	6.26057	4.58059e+07	4.89428e+07	3.8382e+07	4.61563e+07	5.35617e+07	7.61092e+07	8.60886e+07	6.93874e+07	6.22691e+07					0.915232	1.30051	1.47103	1.18565	1.06402
NV2t002538001.1		2	5.86948	9.71954e+06	9.27829e+06	9.36157e+06	1.04835e+07	1.21269e+07	1.09583e+07	1.48545e+07	1.34437e+07	1.47454e+07					1.03973	0.939539	1.27358	1.15263	1.26423
NV2t002539001.1		18	7.32154	3.91026e+08	4.31007e+08	4.92674e+08	6.26369e+08	6.75395e+08	5.90099e+08	3.51389e+08	2.95466e+08	2.95855e+08					1.46497	1.27996	0.762181	0.640881	0.641724
NV2t002540001.1		12	6.78003	2.24139e+08	1.53327e+08	1.8163e+08	2.41431e+08	3.89867e+08	3.32495e+08	1.81858e+08	1.64526e+08	1.62858e+08					1.72666	1.47257	0.805421	0.72866	0.721273
NV2t002542001.1		15	6.97564	1.60794e+08	1.58342e+08	1.49077e+08	1.19203e+08	1.18459e+08	1.19397e+08	1.37556e+08	1.40475e+08	1.48037e+08					0.851991	0.858741	0.989344	1.01034	1.06473
NV2t002544001.1		6	6.68147	7.97733e+07	8.96183e+07	6.68942e+07	6.95927e+07	6.21027e+07	8.12375e+07	7.06974e+07	7.04763e+07	7.21803e+07					0.843567	1.10348	0.960312	0.957309	0.980455
NV2t002545001.1		4	6.49748	1.93129e+07	2.27081e+07	2.0179e+07	4.56949e+07	4.18366e+07	5.07066e+07	3.88173e+07	3.60354e+07	3.34591e+07					1.21953	1.47809	1.13152	1.05043	0.975327
NV2t002556001.1		2	6.79062	4.78992e+07	6.18514e+07	5.07172e+07	6.00697e+07	4.98955e+07	3.90741e+07	1.62646e+08	1.51545e+08	2.36005e+08					0.522342	0.409057	1.7027	1.58649	2.47067
NV2t002571001.1	Leucine-rich repeat-containing G protein-coupled receptor-like-1
NV2t002577002.1		26	7.23581	3.99707e+08	4.68575e+08	4.93517e+08	2.81864e+08	2.90855e+08	2.4094e+08	3.80792e+08	3.14586e+08	3.60576e+08					0.810078	0.671057	1.06057	0.876173	1.00426
NV2t002578001.1		9	7.83212	4.55663e+08	4.73149e+08	2.54704e+08	2.36498e+08	2.11586e+08	2.98645e+08	2.24538e+08	2.41548e+08	3.17915e+08					0.701586	0.99026	0.744533	0.800933	1.05415
NV2t002582001.1		11	7.28486	1.41602e+08	1.31297e+08	1.24722e+08	8.14782e+07	7.42064e+07	8.84483e+07	6.05199e+07	7.16206e+07	6.32582e+07					0.797773	0.950883	0.650633	0.769973	0.680071
NV2t002583001.1		3	6.12861	2.83418e+07	2.50913e+07	2.87544e+07	5.3035e+07	5.67904e+07	5.02592e+07	5.31717e+07	5.6053e+07	5.527e+07					1.25653	1.11202	1.17646	1.24021	1.22289
NV2t002591001.1		7	6.44781	5.86949e+07	6.11451e+07	5.88865e+07	5.39868e+07	5.20024e+07	5.62886e+07	7.35685e+07	7.32691e+07	7.02884e+07					0.838552	0.907668	1.18631	1.18148	1.13342
NV2t002610001.1		3	5.79822	8.02726e+06	8.48507e+06	8.36566e+06	1.72841e+07	1.55357e+07	1.71932e+07	2.28839e+07	2.40704e+07	2.2061e+07					0.971616	1.07528	1.43117	1.50538	1.37971
NV2t002615001.1		10	6.87027	1.84717e+08	1.45103e+08	1.8175e+08	3.25775e+08	4.91739e+08	2.86885e+08	2.1827e+08	1.83964e+08	2.51752e+08					1.94966	1.13745	0.865405	0.729388	0.998157
NV2t002620001.1		2	6.39105	7.33693e+06	8.39824e+06	1.24498e+07	6.68254e+07	9.85433e+07	4.4991e+07	1.30879e+07	7.74882e+06	1.14493e+07					3.2747	1.4951	0.434925	0.257502	0.380472
NV2t002631001.1		13	6.35779	8.09434e+07	9.86457e+07	8.26045e+07	7.82031e+07	6.06943e+07	7.48108e+07	9.68997e+07	1.02383e+08	9.9197e+07					0.7054	0.869464	1.12619	1.18991	1.15289
NV2t002635001.1		3	7.03607	1.20147e+08	7.97087e+07	6.56695e+07	1.23701e+08	2.51271e+08	1.06562e+08	7.91955e+07	5.87306e+07	1.68097e+08					2.14745	0.910716	0.676832	0.501932	1.43661
NV2t002641001.1		2	5.87994	2.35376e+06	2.42466e+06	2.34133e+06	3.32369e+06	2.77402e+06	2.58002e+06	2.78241e+06	3.23421e+06	3.60128e+06					0.982325	0.913625	0.985295	1.14529	1.27527
NV2t002642001.1		9	6.64634	6.07308e+07	6.74418e+07	5.68545e+07	5.35956e+07	3.8517e+07	6.68832e+07	3.80635e+07	4.7664e+07	3.25614e+07					0.749824	1.30204	0.740997	0.927894	0.633886
NV2t002643001.1		23	7.15349	4.57333e+08	4.16825e+08	3.94559e+08	5.39238e+08	5.46797e+08	5.52473e+08	3.91546e+08	4.23391e+08	4.42703e+08					1.18159	1.19386	0.846106	0.914921	0.956652
NV2t002651002.1		11	7.58182	2.29346e+08	2.62558e+08	2.34039e+08	2.36686e+08	1.96315e+08	2.35041e+08	4.79734e+08	5.04905e+08	4.7312e+08					0.619563	0.74178	1.51402	1.59346	1.49315
NV2t002655001.1		2	6.52652	8.87318e+07	1.08225e+08	8.70102e+07	1.40511e+08	2.11421e+08	1.22702e+08	4.18739e+08	2.28025e+08	4.88708e+08					1.0046	0.583039	1.98971	1.0835	2.32217
NV2t002656001.1		6	6.62642	6.85984e+07	7.79418e+07	7.70276e+07	4.62196e+07	4.5446e+07	4.16722e+07	3.84835e+07	3.4425e+07	3.79893e+07					0.874329	0.801724	0.740379	0.662298	0.730871
NV2t002658001.1		6	6.76522	8.51769e+07	8.21108e+07	7.9816e+07	8.47732e+07	7.86325e+07	7.8786e+07	6.20053e+07	6.92999e+07	7.11557e+07					1.02304	1.02503	0.806711	0.901617	0.925761
NV2t002661001.1	CUB domain containing protein-4
NV2t002663001.1		6	8.07918	5.9867e+08	6.25439e+08	6.04547e+08	1.91201e+08	1.67715e+08	2.08401e+08	1.6177e+08	1.76419e+08	1.46887e+08					0.523918	0.651016	0.505347	0.551108	0.458856
NV2t002664001.1		3	7.32434	1.02062e+08	1.48744e+08	7.38563e+07	4.23744e+07	1.48618e+07	5.05048e+07	2.3788e+07	4.65092e+07	2.7564e+07					0.252244	0.857201	0.403745	0.789385	0.467834
NV2t002666001.1		18	7.21269	1.90008e+08	2.62713e+08	1.27078e+08	1.53082e+08	1.01729e+08	1.95422e+08	1.09872e+08	1.19504e+08	1.28611e+08					0.659615	1.26713	0.712418	0.774871	0.833922
NV2t002667001.1	Collagen triple helix repeat-containing protein 1-like	3	6.72781	9.15673e+07	1.10068e+08	8.17508e+07	4.87298e+07	5.5628e+07	6.93877e+07	1.29691e+08	9.44531e+07	1.01955e+08					0.639213	0.797323	1.49027	1.08535	1.17155
NV2t002669002.1		4	6.93593	6.66505e+07	5.10277e+07	5.24315e+07	2.23466e+08	2.37397e+08	1.92689e+08	2.23141e+08	2.74182e+08	3.28763e+08					1.29509	1.05119	1.21732	1.49577	1.79353
NV2t002670002.1		23	7.11022	2.98036e+08	2.7359e+08	2.81729e+08	4.66803e+08	4.70253e+08	5.3814e+08	3.0552e+08	3.3017e+08	2.80191e+08					1.30447	1.49279	0.847508	0.915885	0.777246
NV2t002692001.1		7	6.4356	4.71816e+07	4.67814e+07	4.40451e+07	7.70497e+07	9.36781e+07	1.02719e+08	7.77776e+07	6.44782e+07	6.24578e+07					1.3683	1.50036	1.13605	0.941793	0.912283
NV2t002698002.1	Fibrinogen-related protein-18
NV2t002703001.1		7	7.01831	7.20446e+07	6.67769e+07	8.66729e+07	2.26985e+08	4.05155e+08	1.39055e+08	1.62554e+08	9.81915e+07	2.20426e+08					2.46735	0.846832	0.989934	0.597975	1.34237
NV2t002707001.1	Wnt16
NV2t002708001.1		8	6.56053	5.11037e+07	5.37739e+07	5.01816e+07	5.29339e+07	4.66372e+07	5.31012e+07	3.87662e+07	4.1789e+07	3.93306e+07					0.981566	1.11761	0.815907	0.879527	0.827786
NV2t002713002.1		7	8.26496	4.98654e+08	5.15177e+08	4.66072e+08	1.45296e+08	1.3843e+08	1.82929e+08	1.17878e+08	1.19682e+08	1.00113e+08					0.545422	0.720752	0.464447	0.471552	0.394451
NV2t002714001.1		3	6.76645	4.00035e+07	4.24954e+07	3.57144e+07	2.66231e+07	2.4669e+07	3.02071e+07	3.14527e+07	3.19335e+07	3.10313e+07					0.754839	0.9243	0.962412	0.977125	0.949518
NV2t002716001.1		3	6.79457	9.78336e+07	8.4011e+07	8.11442e+07	3.76101e+07	5.66074e+07	4.57759e+07	3.03971e+07	2.35039e+07	3.00933e+07					1.04618	0.846002	0.56178	0.434385	0.556165
NV2t002717003.1		2	7.65229	1.38998e+08	1.49659e+08	2.04838e+08	5.18244e+06	1.00876e+07	1.65498e+07	4.80161e+06	2.28963e+06	1.01968e+06					0.170198	0.279229	0.0810131	0.0386308	0.0172042
NV2t002718001.1		4	6.83992	2.77574e+07	3.6281e+07	2.54415e+07	1.81799e+07	1.48521e+07	1.75633e+07	1.54742e+07	1.44823e+07	1.74649e+07					0.712914	0.843055	0.742776	0.695161	0.838332
NV2t002719002.1		3	6.90599	3.66577e+07	3.56128e+07	2.69536e+07	4.27992e+07	3.40619e+07	4.65043e+07	2.62923e+07	3.39844e+07	3.28896e+07					0.970868	1.32551	0.74941	0.96866	0.937453
NV2t002721001.1		4	6.07943	1.70608e+07	1.70787e+07	1.4642e+07	3.2027e+07	2.86674e+07	2.99057e+07	2.58505e+07	2.88315e+07	3.2238e+07					1.1401	1.18935	1.02807	1.14663	1.2821
NV2t002735001.1		5	6.71391	6.67019e+07	5.54899e+07	6.39429e+07	8.18419e+07	9.54079e+07	6.42866e+07	6.46989e+07	6.66711e+07	8.58691e+07					1.33146	0.897147	0.902901	0.930425	1.19834
NV2t002740001.1		3	5.61934	2.67419e+06	2.95533e+06	4.49643e+06	4.51562e+06	3.1918e+06	2.61709e+06	2.36492e+07	3.0256e+07	2.42538e+07					0.291313	0.238859	2.15844	2.76144	2.21363
NV2t002742001.1		3	6.32035	5.37759e+07	5.36786e+07	4.42761e+07	4.12731e+07	4.44557e+07	5.85459e+07	1.69458e+07	1.57512e+07	1.45007e+07					1.16579	1.53528	0.444378	0.413052	0.38026
NV2t002745001.1		12	7.50852	1.10794e+08	1.37889e+08	2.03117e+08	1.08168e+08	1.04431e+08	8.07704e+07	2.79992e+08	2.32878e+08	2.0441e+08					0.642674	0.497066	1.72309	1.43314	1.25795
NV2t002746001.1		2	6.22066	2.09033e+07	1.63556e+07	1.90415e+07	4.46247e+07	5.50261e+07	4.46464e+07	4.08653e+07	4.23287e+07	4.48122e+07					1.50709	1.2228	1.11924	1.15932	1.22734
NV2t002747001.1		2	6.36092	2.17316e+07	2.18648e+07	2.34674e+07	1.22924e+07	1.27785e+07	1.24665e+07	1.40389e+07	1.34142e+07	1.28113e+07					0.793884	0.774502	0.872189	0.833377	0.795921
NV2t002748003.1		9	7.23658	1.93974e+08	1.73928e+08	1.67596e+08	3.70175e+08	4.32884e+08	5.10966e+08	7.4109e+08	7.06327e+08	6.21016e+08					0.994384	1.17375	1.70237	1.62252	1.42655
NV2t002749001.1		2	6.78954	1.84493e+07	2.12447e+07	2.636e+07	1.19834e+07	9.54024e+06	1.06173e+07	1.16329e+07	1.26812e+07	9.18388e+06					0.651988	0.725595	0.795001	0.866646	0.627634
NV2t002751001.1		3	6.38112	3.37225e+07	5.16848e+07	4.03912e+07	6.82041e+06	5.0065e+06	9.33047e+06	9.99975e+06	8.88275e+06	6.09914e+06					0.262063	0.4884	0.523433	0.464964	0.319257
NV2t002752001.1		3	6.46246	3.98326e+07	4.11661e+07	3.65072e+07	3.77808e+07	4.24772e+07	4.47771e+07	3.6066e+07	3.10197e+07	3.31827e+07					1.11518	1.17556	0.946864	0.814381	0.871167
NV2t002753003.1		28	7.44204	5.16487e+08	4.79007e+08	5.7671e+08	2.77872e+08	3.14054e+08	3.00354e+08	5.3586e+08	5.10899e+08	4.43715e+08					0.71467	0.683492	1.21942	1.16261	1.00973
NV2t002755001.1	Polydom-like-2	20	7.20136	2.17154e+08	1.66175e+08	1.50543e+08	6.33611e+08	7.26109e+08	5.99037e+08	2.73707e+09	3.11914e+09	4.17349e+09					0.521866	0.430538	1.96717	2.24177	2.99956
NV2t002757001.1		6	7.01309	1.35349e+08	8.98414e+07	1.19845e+08	2.40688e+08	3.2185e+08	1.88733e+08	3.85869e+08	4.34455e+08	5.55421e+08					1.17176	0.68712	1.40483	1.58172	2.02212
NV2t002761001.1		18	7.01358	2.47699e+08	2.50528e+08	2.37066e+08	1.25453e+08	1.10131e+08	1.51053e+08	1.54837e+08	1.74276e+08	1.34282e+08					0.625223	0.857538	0.879018	0.989376	0.76233
NV2t002769001.1		3	6.43846	5.76842e+07	3.93393e+07	4.79718e+07	6.31389e+07	8.55855e+07	5.3916e+07	5.5669e+07	6.01821e+07	7.83435e+07					1.42161	0.895564	0.924683	0.999647	1.30131
NV2t002778001.1		2	6.26803	9.79568e+06	1.15529e+07	1.11414e+07	8.50946e+06	7.01027e+06	7.28036e+06	8.85529e+06	9.1083e+06	9.09466e+06					0.766165	0.795684	0.967811	0.995463	0.993972
NV2t002779001.1	TIMP metalloprotease inhibitor-4
NV2t002780001.1	TSR domain-containing protein-2	10	6.60524	4.15779e+07	4.48723e+07	5.39065e+07	1.9369e+08	1.96525e+08	1.51905e+08	1.25872e+09	1.14875e+09	1.23715e+09					0.408756	0.31595	2.61803	2.38931	2.57317
NV2t002790001.1		3	6.301	2.37554e+07	3.09686e+07	3.09855e+07	2.10329e+07	1.4836e+07	1.39789e+07	2.63498e+07	2.86369e+07	3.03771e+07					0.604396	0.56948	1.07345	1.16663	1.23752
NV2t002794002.1		4	6.3681	2.23827e+07	2.10691e+07	2.26326e+07	4.66629e+07	6.05511e+07	4.21156e+07	5.06337e+07	4.14268e+07	5.5448e+07					1.50159	1.04441	1.25565	1.02733	1.37504
NV2t002796001.1		7	6.24655	5.07867e+07	6.38634e+07	5.08783e+07	6.11033e+07	5.95385e+07	7.13756e+07	6.33511e+07	5.16708e+07	5.41035e+07					1.01742	1.2197	1.08257	0.882974	0.924546
NV2t002797001.1		7	6.29725	2.68983e+07	3.3757e+07	2.35267e+07	5.06712e+07	4.3801e+07	5.11909e+07	4.07875e+07	3.75744e+07	4.61317e+07					1.11252	1.30022	1.03598	0.954368	1.17172
NV2t002799001.1		13	6.40674	6.99708e+07	1.01424e+08	7.48375e+07	6.53629e+07	4.74866e+07	7.54587e+07	8.27319e+07	7.8512e+07	6.69624e+07					0.644861	1.02472	1.12349	1.06618	0.909339
NV2t002801001.1		2	6.3763	2.34598e+07	3.14136e+07	2.44945e+07	2.04076e+07	1.46615e+07	2.11601e+07	5.51806e+07	5.73233e+07	5.09396e+07					0.441257	0.63684	1.66073	1.72522	1.53309
NV2t002807001.1		6	6.90288	6.32249e+07	5.19668e+07	5.14827e+07	1.14042e+08	1.07584e+08	7.52002e+07	3.82016e+08	4.9236e+08	7.11037e+08					0.472572	0.330322	1.67803	2.16273	3.12328
NV2t002812001.1	Plexin-like
NV2t002814001.1	Cubilin-like-4
NV2t002816001.1		5	7.68056	1.45358e+08	1.03898e+08	1.4868e+08	3.34308e+08	3.04958e+08	2.14157e+08	3.47039e+08	5.31914e+08	5.29318e+08					1.03196	0.724693	1.17435	1.79996	1.79118
NV2t002818001.1		3	5.7223	1.61363e+07	1.78164e+07	1.35982e+07	1.37785e+07	1.03939e+07	1.74587e+07	1.28629e+07	1.54339e+07	1.20391e+07					0.722253	1.21318	0.893825	1.07248	0.836577
NV2t002824002.1	Polydom-like-3	13	7.09767	1.20427e+08	1.33762e+08	1.19307e+08	4.46403e+08	3.95534e+08	3.5714e+08	1.8123e+09	1.8403e+09	2.28515e+09					0.473988	0.427979	2.17177	2.20532	2.73841
NV2t002825001.1	Cubilin-like-1
NV2t002834001.1		17	7.48244	1.86404e+08	1.32402e+08	2.12271e+08	1.66946e+09	2.16051e+09	6.93121e+08	2.26474e+09	2.46221e+09	4.78728e+09					1.33471	0.428193	1.3991	1.52109	2.95747
NV2t002841001.1		6	6.75622	8.8795e+07	7.95388e+07	8.62502e+07	4.07424e+07	4.75468e+07	3.62905e+07	5.63981e+07	5.39169e+07	6.51455e+07					0.771552	0.588894	0.915183	0.87492	1.05713
NV2t002846001.1		20	7.16213	4.51461e+08	3.94019e+08	3.79233e+08	3.81026e+08	4.22894e+08	3.98282e+08	2.9955e+08	3.09045e+08	3.40947e+08					1.12723	1.06163	0.798455	0.823764	0.908799
NV2t002857001.1		2	5.82829	3.88209e+06	4.6637e+06	4.70102e+06	1.07952e+07	8.67414e+06	7.1906e+06	6.53841e+06	6.76922e+06	8.10123e+06					1.2732	1.05545	0.959718	0.993595	1.18911
NV2t002865001.1		19	7.08398	3.4448e+08	2.50087e+08	3.92281e+08	3.15657e+08	3.35479e+08	2.87859e+08	2.73953e+08	3.54832e+08	2.63644e+08					1.07134	0.919262	0.874853	1.13314	0.841932
NV2t002866001.1		8	8.37195	5.70801e+08	4.39967e+08	4.29846e+08	6.04686e+08	7.19401e+08	7.09603e+08	6.79546e+08	7.40575e+08	7.68501e+08					1.14333	1.12776	1.07999	1.17698	1.22137
NV2t002867001.1		17	6.6828	9.56835e+07	1.05996e+08	9.59993e+07	1.49924e+08	9.60244e+07	1.31176e+08	9.00448e+07	1.26831e+08	1.02514e+08					0.869268	1.18748	0.815138	1.14814	0.928018
NV2t002869001.1		7	6.50496	9.73788e+07	1.01588e+08	5.10628e+07	8.14932e+07	6.72994e+07	8.63402e+07	6.65582e+07	7.72073e+07	1.19732e+08					0.809039	1.03794	0.800128	0.928146	1.43935
NV2t002870001.1		9	6.53247	6.42732e+07	6.62796e+07	5.31881e+07	5.02688e+07	4.14029e+07	5.69835e+07	6.18653e+07	7.27931e+07	6.59099e+07					0.699158	0.962262	1.0447	1.22923	1.113
NV2t002873001.1		3	6.54645	4.85042e+07	5.14942e+07	4.89116e+07	3.02874e+07	2.44051e+07	3.49053e+07	2.37721e+07	2.77713e+07	2.0443e+07					0.707407	1.01177	0.689059	0.80498	0.592563
NV2t002874001.1		3	6.13649	2.06182e+07	1.91859e+07	2.55062e+07	1.98206e+07	2.34365e+07	1.86068e+07	1.76895e+07	1.60669e+07	1.52231e+07					1.19741	0.950654	0.903787	0.820887	0.777776
NV2t002875001.1		6	6.69774	2.97582e+07	3.69611e+07	3.03815e+07	3.93134e+08	2.14445e+08	2.94995e+08	1.88052e+08	2.77389e+08	2.45324e+08					1.12837	1.55221	0.989491	1.45957	1.29085
NV2t002882001.1		7	6.96646	6.54601e+07	4.91347e+07	5.95453e+07	1.70371e+08	2.33454e+08	1.43781e+08	1.52369e+08	1.48049e+08	1.98362e+08					1.72146	1.06022	1.12355	1.09169	1.46269
NV2t002886001.1		2	7.00338	5.72406e+07	4.55634e+07	4.99457e+07	4.26034e+07	5.69763e+07	3.64078e+07	5.99972e+07	5.6324e+07	8.04127e+07					1.05627	0.674954	1.11227	1.04417	1.49075
NV2t002891001.1		5	6.90167	2.60947e+07	2.59473e+07	2.58233e+07	3.0503e+07	2.99099e+07	3.3401e+07	7.51435e+07	7.70201e+07	6.93032e+07					0.684706	0.764624	1.7202	1.76316	1.58651
NV2t002894001.1		2	6.97502	4.62779e+07	5.08125e+07	5.42997e+07	2.1928e+07	1.99014e+07	2.24067e+07	1.09096e+07	1.09409e+07	9.09382e+06					0.726416	0.81786	0.398208	0.399351	0.331931
NV2t002895001.1		12	6.59536	9.10554e+07	9.26139e+07	9.80463e+07	5.76872e+07	5.91103e+07	6.78714e+07	1.12635e+08	1.08005e+08	8.88546e+07					0.685664	0.78729	1.30654	1.25283	1.03069
NV2t002896001.1	Putative vacuolar protein sorting-associated protein TDA6-2	8	6.95042	8.10764e+07	1.48175e+08	8.2668e+07	2.37073e+08	2.10237e+08	3.86146e+08	4.37904e+08	2.70021e+08	2.63515e+08					0.89386	1.64177	1.86183	1.14804	1.12038
NV2t002899001.1		2	5.93284	8.05214e+06	7.39787e+06	5.09295e+06	7.80929e+06	1.10286e+07	1.32202e+07	1.38718e+07	1.06845e+07	1.29475e+07					1.10158	1.32048	1.38556	1.0672	1.29325
NV2t002903001.1		11	6.47218	1.16617e+08	1.4806e+08	1.14606e+08	7.45303e+07	7.70646e+07	8.47906e+07	8.65502e+07	6.58867e+07	7.73658e+07					0.820349	0.902592	0.921323	0.701361	0.823555
NV2t002906001.1		3	5.94044	9.48219e+06	9.70574e+06	8.79326e+06	1.91634e+07	1.71926e+07	1.54106e+07	1.49465e+07	1.62659e+07	2.00304e+07					1.18125	1.05882	1.02693	1.11758	1.37623
NV2t002921001.1		4	6.5248	2.44835e+07	2.34035e+07	2.06209e+07	4.13541e+07	3.27129e+07	3.88287e+07	2.99756e+07	3.96174e+07	3.78825e+07					1.01917	1.2097	0.933886	1.23428	1.18023
NV2t002923001.1	Vascular endothelial growth factor-like
NV2t002926001.1		14	7.96748	4.44995e+08	5.11539e+08	4.35168e+08	1.10451e+08	8.91099e+07	1.81583e+08	4.77287e+08	5.14313e+08	2.96698e+08					0.26199	0.533867	1.40326	1.51212	0.872314
NV2t002927001.1		14	6.63974	1.28828e+08	1.2936e+08	1.19938e+08	1.26051e+08	1.35311e+08	1.41291e+08	1.53005e+08	1.41858e+08	1.46531e+08					0.996423	1.04046	1.12672	1.04463	1.07904
NV2t002930001.1		24	7.58703	6.24895e+08	6.02844e+08	6.9267e+08	4.08235e+08	4.51341e+08	4.001e+08	4.14471e+08	3.88354e+08	3.81291e+08					0.93077	0.825099	0.854737	0.800877	0.78631
NV2t002932001.1		8	6.6895	8.16583e+07	8.22082e+07	8.80814e+07	7.85187e+07	6.87317e+07	7.01045e+07	7.11325e+07	8.06669e+07	7.38161e+07					0.890155	0.907934	0.921249	1.04473	0.956004
NV2t002933001.1		6	6.34969	5.03765e+07	6.31496e+07	6.53999e+07	4.64737e+07	3.27825e+07	4.1141e+07	5.88404e+07	6.65003e+07	5.11679e+07					0.620056	0.778151	1.11292	1.2578	0.967803
NV2t002934001.1		15	6.66099	1.4391e+08	1.52632e+08	1.61153e+08	1.8854e+08	1.80836e+08	1.83916e+08	1.39229e+08	1.36779e+08	1.27381e+08					1.1507	1.1703	0.885948	0.870359	0.810554
NV2t002939001.1	Similar expression to fibroblast growth factor (SEF)-like
NV2t002940001.1	Cytokine receptor-like-5
NV2t002946001.1		3	5.89679	4.11527e+07	4.39902e+07	4.28013e+07	2.45445e+07	2.37006e+07	2.43373e+07	2.64368e+07	2.5596e+07	2.56195e+07					0.766793	0.787392	0.855317	0.828113	0.828875
NV2t002954001.1		13	7.26933	1.9659e+08	1.8808e+08	1.80087e+08	1.41717e+08	1.66831e+08	1.71042e+08	1.85339e+08	1.64458e+08	1.67534e+08					0.96145	0.985719	1.06812	0.947778	0.965506
NV2t002958001.1		22	6.8632	2.02249e+08	2.16873e+08	2.1036e+08	1.50605e+08	1.52054e+08	1.69177e+08	3.14655e+08	2.90457e+08	2.6915e+08					0.692702	0.770708	1.43345	1.32321	1.22614
NV2t002959001.1		26	6.92238	3.04358e+08	3.02119e+08	2.70913e+08	1.75532e+08	1.71697e+08	2.30237e+08	2.23976e+08	2.30529e+08	1.91724e+08					0.735466	0.986219	0.959401	0.987473	0.821252
NV2t002974001.1		3	6.29829	2.68967e+07	5.02662e+07	3.03783e+07	4.79153e+07	2.67107e+07	4.03806e+07	1.05654e+07	1.0135e+07	1.10933e+07					0.945171	1.42889	0.373861	0.358631	0.392543
NV2t002978001.1	Anti-dorsalizing morphogenetic protein 1-related
NV2t002982001.1		2	6.14523	9.67874e+06	7.83373e+06	8.9924e+06	7.54087e+06	9.67605e+06	7.1422e+06	9.62598e+06	9.26284e+06	1.09324e+07					1.07931	0.796673	1.07373	1.03322	1.21945
NV2t002983001.1		25	7.52448	3.06619e+08	2.72936e+08	2.95291e+08	2.30325e+08	2.5983e+08	2.20948e+08	2.4345e+08	2.42285e+08	2.6336e+08					1.00147	0.851603	0.938333	0.933843	1.01507
NV2t002985001.1		9	7.10977	1.2351e+08	1.11199e+08	1.27516e+08	1.55184e+08	1.73921e+08	1.57497e+08	1.3014e+08	1.28894e+08	1.24126e+08					1.27054	1.15056	0.95071	0.941605	0.906774
NV2t002990001.1		8	7.15362	9.81958e+07	7.69902e+07	1.7477e+08	1.73994e+08	2.62467e+08	7.81131e+07	1.34067e+08	1.13283e+08	1.67686e+08					1.8461	0.549419	0.94298	0.79679	1.17944
NV2t003001001.1		6	7.30249	1.38529e+08	1.36246e+08	1.44933e+08	1.30818e+08	9.91547e+07	1.28467e+08	4.83585e+08	6.48291e+08	4.70394e+08					0.374889	0.485716	1.82836	2.45109	1.77849
NV2t003002001.1		13	7.43184	3.74528e+08	3.99174e+08	2.23679e+08	1.09504e+08	8.91227e+07	1.63968e+08	7.31364e+07	8.42604e+07	8.17341e+07					0.501595	0.922836	0.411622	0.474229	0.460011
NV2t003003001.1		4	6.13975	1.91182e+07	1.7613e+07	1.82586e+07	2.07351e+07	2.0051e+07	1.8949e+07	1.76289e+07	1.97759e+07	2.01866e+07					1.04725	0.989699	0.920749	1.03288	1.05434
NV2t003004001.1		11	7.75593	2.07147e+08	1.75811e+08	2.00915e+08	5.4018e+08	4.85785e+08	3.88675e+08	1.23643e+09	1.6189e+09	1.77062e+09					0.659988	0.528054	1.67981	2.19944	2.40556
NV2t003007001.1		8	6.48313	4.63503e+07	4.50418e+07	4.77101e+07	7.1312e+07	5.93388e+07	6.10278e+07	8.33703e+07	1.03038e+08	9.45861e+07					0.872949	0.897797	1.22648	1.51582	1.39148
NV2t003009001.1		6	6.87111	8.11389e+07	7.84911e+07	6.73601e+07	3.27118e+07	3.48598e+07	4.31784e+07	3.01654e+07	2.92431e+07	2.75114e+07					0.738798	0.915099	0.639308	0.619762	0.58306
NV2t003019001.1		21	6.9811	3.30252e+08	3.47141e+08	3.13796e+08	2.55942e+08	2.19926e+08	2.99914e+08	2.65916e+08	2.94222e+08	2.38686e+08					0.771433	1.052	0.932751	1.03204	0.837235
NV2t003022001.1		8	6.83795	9.90053e+07	1.22375e+08	9.32854e+07	8.58851e+07	6.09593e+07	1.18379e+08	4.54345e+07	5.17554e+07	3.49633e+07					0.770507	1.49628	0.574279	0.654172	0.441925
NV2t003024001.1		5	7.444	8.81171e+07	6.53781e+07	7.40189e+07	1.34821e+08	1.66947e+08	1.42781e+08	1.29633e+08	1.4101e+08	1.45633e+08					1.38056	1.18072	1.072	1.16608	1.20431
NV2t003026001.1	Cubilin-like-3
NV2t003028001.1	Fibropellin-like-1
NV2t003031001.1		2	5.88634	7.58971e+06	6.2201e+06	8.85192e+06	3.22748e+07	3.67724e+07	2.39186e+07	2.81961e+07	3.01775e+07	3.2602e+07					1.60187	1.04194	1.22827	1.31459	1.4202
NV2t003036001.1		18	7.26474	4.98283e+08	5.58238e+08	5.38926e+08	4.07414e+08	3.55278e+08	3.09889e+08	3.04799e+08	3.11792e+08	3.7028e+08					0.874853	0.763087	0.750553	0.767771	0.911795
NV2t003042001.1		22	7.04914	3.69976e+08	4.00318e+08	4.10161e+08	2.22588e+08	2.01454e+08	1.90055e+08	2.96811e+08	3.02901e+08	3.13373e+08					0.669619	0.63173	0.98658	1.00682	1.04163
NV2t003042004.1	Voltage-dependent calcium channel subuni alpha-2/delta-4-related
NV2t003045005.1		7	7.08181	6.42655e+07	5.17241e+07	5.70857e+07	1.19863e+08	1.28884e+08	1.0518e+08	9.65413e+07	1.11483e+08	1.23781e+08					1.35066	1.10225	1.01172	1.16831	1.29718
NV2t003046001.1		10	7.08024	1.81096e+08	1.79852e+08	2.59494e+08	4.91885e+08	5.42459e+08	3.23556e+08	2.72281e+08	2.48447e+08	2.88703e+08					1.75126	1.04456	0.879028	0.802082	0.932044
NV2t003047001.1		23	8.14642	5.07908e+08	5.06643e+08	4.7462e+08	2.05042e+08	2.4498e+08	2.92662e+08	4.08592e+08	3.42619e+08	3.06158e+08					0.670315	0.800783	1.11799	0.937478	0.837712
NV2t003051001.1		4	5.87813	1.86756e+07	1.92639e+07	1.5216e+07	1.944e+07	2.42063e+07	2.17789e+07	2.50086e+07	1.94586e+07	2.73818e+07					1.14403	1.0293	1.18195	0.919643	1.29411
NV2t003053001.1		2	6.10116	1.07463e+07	9.52532e+06	1.02035e+07	2.40356e+07	1.99187e+07	1.78003e+07	1.4802e+07	2.01381e+07	2.10376e+07					1.20958	1.08094	0.898862	1.2229	1.27752
NV2t003063001.1		4	5.83844	1.27441e+07	1.24895e+07	1.17151e+07	1.62837e+07	1.89775e+07	1.77911e+07	3.6209e+07	3.16826e+07	3.60304e+07					0.880748	0.825688	1.68047	1.47039	1.67218
NV2t003064001.1		18	7.16521	4.18813e+08	3.25564e+08	4.23908e+08	2.16753e+08	3.28529e+08	2.55115e+08	1.72751e+08	1.46528e+08	1.44923e+08					1.21533	0.943751	0.639062	0.542054	0.536116
NV2t003066002.1	Suppressor of lurcher protein-like-4
NV2t003067001.1		14	7.86964	5.15148e+08	4.68455e+08	4.7076e+08	2.56846e+08	3.05858e+08	2.80878e+08	8.06341e+08	7.44151e+08	8.06391e+08					0.591369	0.54307	1.55904	1.4388	1.55914
NV2t003067003.1	CUB domain containing protein-5	14	7.86964	5.15148e+08	4.68455e+08	4.7076e+08	2.56846e+08	3.05858e+08	2.80878e+08	8.06341e+08	7.44151e+08	8.06391e+08					0.591369	0.54307	1.55904	1.4388	1.55914
NV2t003073001.1		2	6.2325	1.90055e+07	1.9022e+07	1.91136e+07	1.72798e+07	1.67683e+07	1.86419e+07	1.34005e+07	1.37885e+07	1.23437e+07					1.01038	1.12328	0.807452	0.830836	0.743775
NV2t003086001.1		8	7.29805	1.88488e+08	1.84473e+08	1.49314e+08	2.72865e+08	2.71202e+08	3.64213e+08	3.00453e+08	3.0868e+08	2.83983e+08					1.05041	1.41066	1.16371	1.19557	1.09992
NV2t003094001.1		6	6.45815	6.02827e+07	4.74281e+07	4.63523e+07	6.41517e+07	6.962e+07	6.33012e+07	6.37094e+07	7.45694e+07	8.39189e+07					1.09287	0.993682	1.00009	1.17056	1.31733
NV2t003095001.1		5	6.39843	2.2541e+07	2.06049e+07	2.37222e+07	4.68724e+07	5.90062e+07	3.90903e+07	6.5902e+07	5.72329e+07	7.50419e+07					1.29521	0.858052	1.44658	1.25629	1.64721
NV2t003097001.1		13	8.18319	5.16287e+08	3.652e+08	5.06831e+08	1.13526e+09	1.23765e+09	8.23301e+08	1.14627e+09	1.4855e+09	1.60913e+09					1.26213	0.839587	1.16894	1.51488	1.64096
NV2t003098001.1		9	6.66722	4.86621e+07	4.80304e+07	4.98928e+07	2.67099e+08	2.90737e+08	1.55843e+08	2.83466e+08	2.63678e+08	4.73563e+08					1.39111	0.745671	1.35632	1.26164	2.26589
NV2t003100001.1	Tolloid metalloprotease
NV2t003101001.1		2	6.96899	5.65334e+06	4.28505e+06	7.946e+06	8.67871e+07	1.21309e+08	3.74282e+07	3.35949e+08	3.16893e+08	5.53893e+08					0.742633	0.22913	2.05663	1.93997	3.39085
NV2t003102001.1		2	5.83176	9.50632e+06	1.55335e+07	1.39535e+07	2.12879e+07	1.29447e+07	1.52e+07	8.66042e+06	8.71059e+06	8.25839e+06					1.02145	1.19942	0.683386	0.687345	0.651662
NV2t003107001.1		39	7.60693	8.35753e+08	1.04173e+09	8.88719e+08	4.95485e+08	4.81091e+08	5.47515e+08	7.57446e+08	6.25466e+08	6.44227e+08					0.685376	0.780006	1.07908	0.891057	0.917785
NV2t003108001.1		9	6.2888	6.62355e+07	6.74704e+07	6.22144e+07	4.9344e+07	4.27835e+07	5.15559e+07	6.36207e+07	7.19879e+07	6.47878e+07					0.713059	0.859265	1.06034	1.1998	1.0798
NV2t003117001.1		9	6.32756	8.4399e+07	7.72928e+07	8.72086e+07	8.23867e+07	9.04873e+07	8.40579e+07	9.27763e+07	9.21787e+07	8.79494e+07					1.04578	0.971472	1.07223	1.06533	1.01645
NV2t003119001.1		34	7.87063	8.65356e+08	9.89949e+08	9.4967e+08	6.18852e+08	6.32585e+08	5.57938e+08	1.59581e+09	1.36382e+09	1.61192e+09					0.619783	0.546646	1.56352	1.33622	1.5793
NV2t003120001.1		36	7.83609	1.46466e+09	1.67232e+09	1.70677e+09	7.102e+08	6.33121e+08	7.8028e+08	1.87121e+09	1.83721e+09	1.46067e+09					0.469503	0.578632	1.38763	1.36241	1.08319
NV2t003124001.1		2	5.95018	7.99448e+06	7.9501e+06	9.22037e+06	2.19484e+07	2.84799e+07	2.65661e+07	1.57958e+07	1.22335e+07	1.13083e+07					1.81148	1.68975	1.0047	0.778118	0.719274
NV2t003130005.1		5	6.74314	2.8821e+07	2.23928e+07	2.9582e+07	6.61663e+07	8.16174e+07	5.78383e+07	5.92284e+07	6.17604e+07	6.59738e+07					1.55173	1.09963	1.12606	1.1742	1.25431
NV2t003131001.1		2	6.22243	3.38577e+06	3.61134e+06	4.06216e+06	2.44386e+07	2.22705e+07	1.76964e+07	3.82344e+07	3.93111e+07	4.3983e+07					1.01747	0.808492	1.74681	1.796	2.00944
NV2t003137001.1		8	7.16564	3.02416e+08	2.74232e+08	2.50872e+08	9.94573e+07	1.08323e+08	1.35922e+08	2.0104e+08	2.03428e+08	1.77224e+08					0.556163	0.697864	1.0322	1.04446	0.909921
NV2t003138001.1		2	6.04545	8.16914e+06	9.59097e+06	1.08119e+07	1.26952e+07	1.45288e+07	1.19561e+07	2.36128e+07	1.75629e+07	1.89327e+07					1.02267	0.841581	1.66208	1.23624	1.33266
NV2t003143001.1		9	6.17869	5.57323e+07	4.97322e+07	5.72003e+07	8.38641e+07	9.48954e+07	8.78664e+07	1.10414e+08	1.09282e+08	1.02618e+08					1.13631	1.05215	1.32214	1.30858	1.22879
NV2t003144001.1	FAT atypical cadherin-like	5	6.07962	4.0247e+07	3.10423e+07	3.43308e+07	5.60459e+07	7.19365e+07	6.04978e+07	8.54385e+07	8.62491e+07	9.27359e+07					1.15918	0.974855	1.37675	1.38981	1.49434
NV2t003148001.1		16	7.03313	2.99212e+08	2.39793e+08	2.76736e+08	3.9795e+08	4.44964e+08	3.60343e+08	2.81765e+08	3.14238e+08	3.36241e+08					1.35694	1.09889	0.85926	0.958289	1.02539
NV2t003157001.1	CAPCL-like-2	7	6.33045	6.90107e+07	8.08494e+07	6.02386e+07	5.1512e+07	4.35705e+07	5.01337e+07	7.88129e+07	7.94838e+07	9.27163e+07					0.646736	0.744157	1.16986	1.17981	1.37623
NV2t003161001.1		6	6.44411	4.88345e+07	4.86231e+07	4.47528e+07	1.26209e+08	1.00756e+08	1.48891e+08	1.18058e+08	1.4843e+08	1.09134e+08					1.01468	1.49943	1.18891	1.49478	1.09905
NV2t003164001.1		4	6.48159	4.60841e+07	2.93448e+07	4.99652e+07	3.30237e+07	4.26144e+07	3.45725e+07	4.14241e+07	5.03811e+07	3.64729e+07					1.05399	0.85509	1.02455	1.24609	0.902093
NV2t003167001.1	Suppressor of lurcher protein-like-5	4	6.17398	2.92721e+07	2.73435e+07	3.44025e+07	2.31014e+07	2.65634e+07	2.06329e+07	3.53407e+07	3.28818e+07	3.36479e+07					0.90837	0.705568	1.20852	1.12444	1.15063
NV2t003168001.1	Wnt2b
NV2t003169001.1	Suppressor of lurcher protein-like-6	11	7.13145	2.01212e+08	2.00076e+08	2.14442e+08	2.67626e+08	2.63061e+08	2.23259e+08	7.32961e+08	7.49441e+08	8.23916e+08					0.644057	0.546609	1.79452	1.83487	2.01721
NV2t003175001.1		18	7.49392	3.76696e+08	5.47603e+08	4.29284e+08	3.62899e+08	2.50584e+08	3.59992e+08	2.66655e+08	2.65481e+08	2.35737e+08					0.728693	1.04685	0.775427	0.772013	0.685518
NV2t003177003.1		15	6.58886	1.2148e+08	1.37781e+08	1.30224e+08	1.11289e+08	9.60277e+07	1.15623e+08	1.23399e+08	1.26011e+08	1.10732e+08					0.805777	0.9702	1.03545	1.05737	0.929165
NV2t003181001.1		11	6.98798	1.05449e+08	1.17797e+08	1.03406e+08	1.19858e+08	1.20662e+08	1.35644e+08	9.5523e+07	8.48864e+07	8.60221e+07					1.12042	1.25953	0.886984	0.788217	0.798763
NV2t003182001.1		3	6.45099	1.32175e+07	1.44323e+07	1.36314e+07	1.98533e+07	2.08163e+07	2.01108e+07	3.91143e+07	3.41433e+07	3.74185e+07					0.880645	0.850801	1.65475	1.44445	1.58301
NV2t003187001.1		4	5.91948	1.77906e+07	1.47871e+07	1.3748e+07	4.4893e+07	4.08842e+07	5.72122e+07	3.77584e+07	4.98508e+07	3.83173e+07					1.16722	1.63338	1.07798	1.42322	1.09394
NV2t003189001.1		9	8.20645	1.49735e+08	1.03358e+08	2.02559e+08	5.82901e+08	1.14066e+09	4.18318e+08	2.6688e+08	1.97452e+08	2.74735e+08					3.07676	1.12835	0.719872	0.5326	0.74106
NV2t003192001.1		2	5.93314	4.68845e+06	5.12128e+06	4.26314e+06	9.58439e+06	8.30178e+06	9.77262e+06	5.98626e+06	6.32302e+06	6.45279e+06					1.2351	1.45393	0.89061	0.940713	0.960019
NV2t003194001.1		13	7.182	2.83224e+08	2.12298e+08	3.28118e+08	2.28021e+08	3.48558e+08	2.12232e+08	1.18405e+08	1.03271e+08	1.09741e+08					1.6138	0.982623	0.548206	0.478137	0.508097
NV2t003196001.1		11	7.96192	4.07644e+08	2.47582e+08	3.48823e+08	8.42401e+08	1.09144e+09	5.48416e+08	8.71457e+08	1.10676e+09	1.56339e+09					1.3977	0.702305	1.11599	1.41732	2.0021
NV2t003198001.1		2	6.10295	2.19481e+07	2.94344e+07	2.28952e+07	3.51581e+07	2.75175e+07	3.96136e+07	1.79192e+07	1.7061e+07	1.52368e+07					1.09204	1.57208	0.711131	0.677072	0.604677
NV2t003200001.1		2	6.26755	5.86003e+06	5.52549e+06	7.92224e+06	2.61666e+07	4.72689e+07	1.86784e+07	5.81605e+07	3.41235e+07	6.02317e+07					1.61182	0.636916	1.98321	1.16358	2.05384
NV2t003201001.1		2	6.57184	7.2201e+07	7.0392e+07	6.38708e+07	3.06259e+07	3.02221e+07	3.55382e+07	1.80858e+07	1.87866e+07	1.7608e+07					0.761197	0.895092	0.455523	0.473173	0.443489
NV2t003202001.1	TSR domain-containing protein-3	30	7.24915	4.29411e+08	4.96004e+08	5.37794e+08	1.18667e+09	1.4017e+09	9.19369e+08	2.13418e+09	1.56322e+09	2.19819e+09					1.16093	0.76145	1.7676	1.29471	1.82061
NV2t003214001.1		2	5.87341	6.35498e+06	7.1252e+06	7.42792e+06	7.15663e+06	5.88518e+06	6.71193e+06	6.82502e+06	7.39769e+06	6.2223e+06					0.866787	0.988553	1.00521	1.08955	0.916439
NV2t003215001.1		10	7.49239	4.57619e+08	4.20155e+08	4.12595e+08	2.02032e+08	1.63997e+08	2.16544e+08	2.38651e+08	3.20012e+08	2.46806e+08					0.551063	0.72763	0.801916	1.07531	0.829318
NV2t003216003.1		14	6.58699	1.27082e+08	1.34601e+08	1.1118e+08	1.10175e+08	1.00207e+08	1.24246e+08	1.46473e+08	1.51951e+08	1.48372e+08					0.781313	0.968752	1.14205	1.18476	1.15686
NV2t003227001.1	FAT atypical cadherin
NV2t003229001.1		14	6.70215	9.42775e+07	8.73298e+07	7.35647e+07	1.55949e+08	1.7247e+08	1.4047e+08	1.34749e+08	1.31451e+08	1.91602e+08					1.31338	1.06969	1.02612	1.00101	1.45907
NV2t003231001.1		6	6.94796	8.05671e+07	7.12299e+07	7.49739e+07	5.02157e+07	4.95714e+07	7.86926e+07	3.4774e+07	3.98184e+07	2.38312e+07					0.885776	1.40613	0.621366	0.711503	0.425833
NV2t003240001.1		9	6.75322	1.88584e+08	1.85169e+08	1.83465e+08	7.60843e+07	7.45308e+07	1.04881e+08	7.51428e+07	7.80746e+07	5.59985e+07					0.656383	0.923672	0.661773	0.687593	0.493172
NV2t003245001.1		30	6.87138	4.7833e+08	4.83097e+08	4.2952e+08	5.62905e+08	5.61727e+08	5.27332e+08	4.90099e+08	4.85973e+08	5.82261e+08					1.09873	1.03146	0.958629	0.950559	1.1389
NV2t003247001.1		17	6.77156	2.8877e+08	2.77833e+08	2.66535e+08	3.32971e+08	4.32211e+08	5.63357e+08	2.8984e+08	2.31934e+08	1.85489e+08					1.35587	1.76728	0.909242	0.727587	0.581888
NV2t003248001.1		3	6.58036	2.18458e+07	2.0442e+07	2.25172e+07	7.36163e+07	9.94423e+07	7.21666e+07	4.79128e+07	3.78812e+07	4.73895e+07					2.0193	1.46543	0.972928	0.769224	0.962302
NV2t003252001.1		6	7.29807	1.09942e+08	9.57178e+07	9.58749e+07	1.61191e+08	1.47134e+08	1.49734e+08	5.49387e+08	6.90885e+08	6.77792e+08					0.494538	0.503279	1.84657	2.32216	2.27816
NV2t003253001.1	CUB and Thrombospondin type-1 domain-containing receptor protein
NV2t003255001.1		3	6.43699	2.2854e+07	2.83859e+07	2.99996e+07	5.31136e+07	4.25028e+07	3.82151e+07	7.32315e+07	7.36327e+07	7.74914e+07					0.87051	0.782692	1.49987	1.50809	1.58712
NV2t003260001.1		2	6.03587	1.55734e+07	1.60619e+07	1.52512e+07	9.75965e+06	8.0141e+06	8.42678e+06	7.07706e+06	8.35113e+06	8.36454e+06					0.744499	0.782837	0.65745	0.775809	0.777055
NV2t003266001.1	Serine protease inhibitor-1	10	7.44666	1.5667e+08	2.21849e+08	1.9247e+08	1.33285e+08	9.80027e+07	1.63699e+08	1.50346e+08	1.44308e+08	9.95841e+07					0.648445	1.08313	0.994783	0.954831	0.658909
NV2t003273001.1		6	6.71113	8.57571e+07	8.78431e+07	1.13541e+08	1.09374e+08	1.18045e+08	7.95418e+07	1.30137e+08	1.1764e+08	1.35075e+08					1.08746	0.732764	1.19886	1.08374	1.24435
NV2t003274001.1		4	6.60221	1.93895e+07	1.63852e+07	2.89693e+07	9.36765e+07	1.15452e+08	5.4242e+07	6.22276e+07	5.97109e+07	7.1886e+07					1.99078	0.935317	1.07302	1.02962	1.23956
NV2t003276001.1		2	5.78979	1.0599e+07	9.92574e+06	9.60337e+06	2.92389e+07	3.23931e+07	2.18354e+07	1.872e+07	1.80319e+07	2.76494e+07					1.63788	1.10406	0.946534	0.911742	1.39803
NV2t003279001.1	Astacin Metalloprotease-15
NV2t003286001.1		5	6.41355	5.84234e+07	6.50491e+07	6.26418e+07	7.382e+07	7.96792e+07	7.00589e+07	4.99863e+07	4.15672e+07	4.90934e+07					1.30308	1.14575	0.817483	0.679796	0.80288
NV2t003288001.1		19	7.66114	7.13868e+08	6.52771e+08	6.79415e+08	2.53255e+08	2.49198e+08	2.88967e+08	4.25916e+08	4.73065e+08	3.91973e+08					0.543253	0.62995	0.928501	1.03128	0.854503
NV2t003291001.1		4	8.11636	5.97864e+07	4.54535e+07	4.81832e+07	1.65691e+08	1.73099e+08	1.71888e+08	1.6108e+08	2.02678e+08	1.92549e+08					1.27653	1.2676	1.1879	1.49467	1.41997
NV2t003296001.1		5	6.56944	5.01188e+07	4.96414e+07	5.21391e+07	3.04458e+07	2.68534e+07	3.10043e+07	4.41525e+07	5.05086e+07	4.16521e+07					0.641886	0.741106	1.05539	1.20733	0.995625
NV2t003298001.1		10	7.3639	1.66385e+08	1.52349e+08	2.01391e+08	8.39312e+07	1.20886e+08	1.14802e+08	9.8672e+07	7.47726e+07	5.95636e+07					1.01419	0.963148	0.827822	0.627314	0.499717
NV2t003300001.1	Polydom2	13	6.3185	5.20444e+07	4.9307e+07	4.51845e+07	1.43682e+08	1.73833e+08	1.24879e+08	4.3333e+08	3.77816e+08	5.73929e+08					0.792552	0.569354	1.97567	1.72256	2.61669
NV2t003302001.1		6	6.45421	5.76767e+07	5.52369e+07	4.78301e+07	1.06756e+08	1.16857e+08	1.28097e+08	9.36702e+07	8.92974e+07	9.40798e+07					1.33212	1.46025	1.0678	1.01795	1.07247
NV2t003307001.1		11	6.95695	7.67764e+07	8.52704e+07	8.04341e+07	1.26269e+08	9.66379e+07	1.20777e+08	8.62072e+07	1.01355e+08	8.59767e+07					1.01168	1.26438	0.902479	1.06106	0.900066
NV2t003320001.1		3	6.40545	4.00643e+07	4.16656e+07	5.18056e+07	3.42787e+07	3.73306e+07	2.86977e+07	3.69068e+07	3.25665e+07	3.40724e+07					0.995812	0.765524	0.984507	0.868727	0.9089
NV2t003322001.1		7	6.30784	4.39281e+07	3.885e+07	2.91489e+07	5.63503e+07	6.85485e+07	6.06091e+07	4.4288e+07	4.11396e+07	6.20159e+07					1.38675	1.22614	0.895957	0.832265	1.2546
NV2t003324005.1		3	6.3632	4.3251e+07	4.99457e+07	4.43014e+07	2.32736e+07	2.0024e+07	2.36692e+07	2.80294e+07	2.81936e+07	2.68913e+07					0.626666	0.740745	0.877201	0.882339	0.841582
NV2t003327001.1		8	7.2213	1.94854e+08	2.95067e+08	1.83644e+08	8.58237e+07	4.67932e+07	7.10409e+07	7.46938e+07	9.04116e+07	9.56873e+07					0.370064	0.561827	0.590716	0.71502	0.756744
NV2t003332001.1		12	7.96779	5.41105e+08	5.516e+08	5.8014e+08	3.40725e+08	3.33287e+08	2.46794e+08	2.00472e+08	2.0092e+08	2.57995e+08					0.922086	0.682791	0.554635	0.555874	0.71378
NV2t003333001.1		2	5.99005	2.00565e+07	1.55214e+07	1.73398e+07	7.47322e+06	7.24886e+06	7.20437e+06	6.09971e+06	8.12075e+06	7.31426e+06					0.67691	0.672755	0.5696	0.758328	0.683016
NV2t003336001.1		4	6.71013	4.48536e+07	4.64081e+07	9.62492e+07	7.84396e+07	9.14967e+07	5.12038e+07	1.81669e+08	1.50432e+08	1.29614e+08					0.94612	0.529472	1.87854	1.55554	1.34027
NV2t003340001.1		3	6.09873	3.98295e+07	4.78952e+07	4.4783e+07	2.56925e+07	3.27956e+07	2.70852e+07	3.95851e+07	2.57727e+07	3.33761e+07					0.93165	0.76943	1.12452	0.732144	0.94814
NV2t003343001.1		11	7.38898	8.11367e+07	5.68058e+07	7.35896e+07	6.05728e+08	8.24968e+08	4.65496e+08	7.58239e+08	7.94689e+08	1.0872e+09					1.56381	0.882393	1.43731	1.50641	2.06088
NV2t003349001.1		33	7.50653	6.95255e+08	8.37957e+08	8.15803e+08	2.85053e+08	2.41447e+08	3.23038e+08	2.38244e+08	2.33224e+08	1.79057e+08					0.564557	0.755333	0.557066	0.54533	0.418676
NV2t003353001.1		20	6.91159	2.26374e+08	2.07608e+08	2.01282e+08	1.85602e+08	1.90502e+08	2.09209e+08	2.42587e+08	2.57548e+08	2.41897e+08					0.873592	0.959378	1.11244	1.18104	1.10927
NV2t003368001.1		9	7.21095	2.05655e+08	1.3275e+08	1.88611e+08	2.26999e+08	4.53096e+08	2.01719e+08	1.06345e+08	8.24868e+07	1.30409e+08					2.35978	1.05057	0.55386	0.429601	0.679187
NV2t003372001.1		2	6.18902	2.33805e+07	2.26757e+07	2.63904e+07	5.33486e+07	5.4409e+07	4.52539e+07	2.5341e+07	2.56032e+07	2.64507e+07					1.61689	1.34483	0.753068	0.76086	0.786045
NV2t003373003.1	Kunitz-type serine protease inhibitor-3
NV2t003375001.1	Hemolin-like-1
NV2t003377001.1		3	6.10264	2.56505e+07	2.31647e+07	3.204e+07	8.13688e+06	9.10094e+06	1.20622e+07	8.7987e+06	8.70535e+06	4.74889e+06					0.618606	0.819889	0.598062	0.591717	0.32279
NV2t003381001.1		2	6.69346	3.67082e+07	2.07107e+07	2.73925e+07	6.09369e+07	1.17936e+08	5.57586e+07	8.76608e+07	8.02294e+07	1.28305e+08					1.7241	0.815134	1.28151	1.17287	1.87569
NV2t003384001.1		19	7.20115	3.69424e+08	3.09123e+08	4.06963e+08	3.78754e+08	4.65357e+08	3.79486e+08	3.52357e+08	3.42511e+08	3.19046e+08					1.26036	1.02779	0.954317	0.927649	0.864098
NV2t003387001.1		2	6.5938	1.63687e+07	1.09038e+07	1.43252e+07	9.12374e+07	1.46637e+08	7.12869e+07	9.13514e+07	8.52724e+07	1.33515e+08					1.99688	0.970773	1.24401	1.16123	1.81819
NV2t003389001.1		12	7.88053	5.56864e+08	5.80346e+08	6.09166e+08	4.69479e+08	3.97463e+08	3.80907e+08	2.62718e+08	2.97575e+08	2.95828e+08					0.92905	0.890352	0.61409	0.695568	0.691484
NV2t003390001.1		4	6.27322	2.77642e+07	2.24509e+07	2.56576e+07	3.63582e+07	5.06662e+07	3.12023e+07	3.53573e+07	3.13574e+07	4.45558e+07					1.49326	0.919608	1.04207	0.92418	1.31317
NV2t003391001.1		17	7.30341	3.64869e+08	3.25546e+08	4.0667e+08	3.32354e+08	3.57125e+08	3.30854e+08	2.30394e+08	2.4016e+08	2.07524e+08					1.14975	1.06517	0.741745	0.773188	0.668117
NV2t003396003.1	EGF-like repeat and discoidin domain-containing protein-2
NV2t003397001.1		29	7.51692	6.52643e+08	6.10947e+08	6.04005e+08	4.82594e+08	5.20849e+08	5.26488e+08	5.03996e+08	4.98533e+08	4.98877e+08					0.956871	0.96723	0.925908	0.915873	0.916505
NV2t003399001.1	Host cell factor 1	3	6.11794	1.74932e+07	2.04618e+07	1.69441e+07	2.09786e+07	1.89007e+07	2.07348e+07	2.02067e+07	1.91622e+07	2.10941e+07					0.966643	1.06044	1.03344	0.980018	1.07882
NV2t003401001.1		16	7.38819	2.75144e+08	2.55952e+08	4.44369e+08	6.28475e+08	6.87615e+08	3.65967e+08	4.97343e+08	4.88343e+08	5.28515e+08					1.48345	0.78953	1.07296	1.05354	1.14021
NV2t003405001.1		8	5.99484	3.81025e+07	3.66792e+07	3.37067e+07	2.99805e+07	2.69458e+07	3.6984e+07	4.99117e+07	5.76512e+07	4.57091e+07					0.681846	0.935856	1.26298	1.45882	1.15664
NV2t003406001.1		2	6.81955	3.34695e+07	2.23441e+07	3.13727e+07	4.46448e+06	9.94547e+06	8.27815e+06	2.36217e+07	1.58733e+07	1.35827e+07					0.549298	0.457211	1.30465	0.876701	0.750183
NV2t003407001.1	Selectin-related protein-1
NV2t003415001.1		3	5.78716	9.095e+06	1.09145e+07	8.68419e+06	2.99325e+07	2.48297e+07	2.80091e+07	7.56364e+07	7.59322e+07	8.46034e+07					0.642819	0.725129	1.95816	1.96581	2.1903
NV2t003419001.1		16	7.74605	5.73686e+08	5.11396e+08	5.93108e+08	3.85444e+08	4.56649e+08	4.32394e+08	4.96382e+08	4.69718e+08	4.27736e+08					0.945548	0.895326	1.02782	0.97261	0.885682
NV2t003424001.1	Kielin/Chordin-like -1
NV2t003430001.1		3	6.30118	2.8518e+07	2.80492e+07	2.21283e+07	2.98018e+07	2.98947e+07	3.87459e+07	5.44625e+07	5.5166e+07	5.39542e+07					0.789656	1.02346	1.43861	1.45719	1.42518
NV2t003432001.1		9	6.07057	8.69316e+07	8.97355e+07	8.49364e+07	4.52886e+07	5.11792e+07	6.48212e+07	5.77742e+07	4.94957e+07	4.12885e+07					0.806042	1.02089	0.909909	0.779527	0.650268
NV2t003435001.1		4	6.63448	5.08795e+07	5.68168e+07	4.51743e+07	7.63849e+07	5.02833e+07	9.78306e+07	1.3482e+08	1.83286e+08	1.18489e+08					0.555982	1.08171	1.4907	2.02659	1.31013
NV2t003437001.1	Transforming growth factor-beta-induced protein ig-h3-1
NV2t003439001.1		11	6.775	1.58537e+08	2.05364e+08	1.16475e+08	1.26599e+08	1.39633e+08	1.61763e+08	1.48794e+08	1.04078e+08	1.58407e+08					0.952295	1.10322	1.01478	0.709812	1.08034
NV2t003440001.1		6	6.63764	8.45196e+07	7.18415e+07	8.03189e+07	4.89961e+07	6.49056e+07	5.93498e+07	5.58469e+07	4.95662e+07	4.84864e+07					1.03604	0.947355	0.891441	0.791187	0.773951
NV2t003447001.1		4	6.18463	3.77818e+07	3.29514e+07	2.68717e+07	5.99612e+07	6.75652e+07	7.86732e+07	3.31828e+07	3.37439e+07	3.55372e+07					1.49676	1.74284	0.735093	0.747523	0.78725
NV2t003451001.1		3	6.35541	1.33029e+07	1.20614e+07	1.36432e+07	1.26197e+07	9.10471e+06	9.60286e+06	1.36395e+07	2.0838e+07	1.74669e+07					0.670125	0.70679	1.0039	1.53372	1.2856
NV2t003454001.1		18	8.16573	9.06076e+08	6.13125e+08	8.23691e+08	2.15454e+09	2.45283e+09	1.53825e+09	2.00369e+09	2.59932e+09	3.08531e+09					1.36464	0.855806	1.11476	1.44613	1.71651
NV2t003457001.1		20	8.49793	1.09433e+09	1.11621e+09	1.25222e+09	3.61963e+08	3.3647e+08	3.72e+08	3.77095e+08	3.97463e+08	3.20463e+08					0.538044	0.59486	0.603008	0.635576	0.512448
NV2t003462001.1		13	6.56677	2.03402e+08	1.94574e+08	1.76765e+08	1.33835e+08	1.3804e+08	1.80985e+08	1.11202e+08	1.12635e+08	9.45668e+07					0.923001	1.21015	0.743549	0.753128	0.632317
NV2t003463001.1		33	8.48482	1.78701e+09	2.01219e+09	1.64809e+09	4.14694e+08	3.45873e+08	4.07837e+08	5.16172e+08	5.49277e+08	5.68749e+08					0.37732	0.444919	0.563104	0.599219	0.620462
NV2t003469001.1		11	7.12362	1.27994e+08	2.00664e+08	1.67523e+08	4.20152e+08	1.73484e+08	2.73759e+08	1.62098e+08	2.50248e+08	1.89963e+08					0.794226	1.25329	0.742101	1.14566	0.86967
NV2t003483001.1		7	6.4005	5.78626e+07	5.28974e+07	5.27559e+07	5.4636e+07	5.52302e+07	7.12774e+07	7.13278e+07	7.71349e+07	5.9931e+07					0.898778	1.15992	1.16074	1.25524	0.975275
NV2t003484001.1		3	6.33868	1.98844e+07	2.10287e+07	1.96526e+07	2.06313e+07	2.66494e+07	1.87957e+07	2.37774e+07	1.73952e+07	2.63915e+07					1.235	0.87104	1.1019	0.806137	1.22305
NV2t003486001.1		12	6.87218	2.10463e+08	1.97364e+08	1.90687e+08	1.48846e+08	1.70964e+08	1.84219e+08	1.36094e+08	1.26272e+08	1.21293e+08					1.03531	1.11558	0.824145	0.764665	0.734514
NV2t003494001.1		5	6.92222	6.51468e+07	6.51978e+07	7.97492e+07	4.4487e+07	5.23691e+07	4.67279e+07	4.17992e+07	3.54578e+07	3.24886e+07					1.01704	0.907487	0.81177	0.688615	0.630951
NV2t003495004.1		4	6.40078	3.53703e+07	3.53008e+07	3.20851e+07	4.37853e+07	4.66053e+07	4.91751e+07	7.4279e+07	6.98777e+07	7.28659e+07					0.913144	0.963494	1.45536	1.36912	1.42767
NV2t003502001.1		2	6.09758	5.29979e+06	5.90106e+06	5.05451e+06	1.34228e+07	1.467e+07	1.39558e+07	1.14875e+07	9.43394e+06	1.15779e+07					1.45402	1.38324	1.13859	0.935048	1.14755
NV2t003505001.1		8	6.31693	5.5042e+07	5.74437e+07	6.03223e+07	5.53503e+07	5.00691e+07	5.36065e+07	8.94571e+07	9.46985e+07	8.42312e+07					0.75076	0.803801	1.34136	1.41996	1.263
NV2t003507001.1		11	7.72699	3.45936e+08	3.29189e+08	3.62543e+08	1.59716e+08	1.83449e+08	1.97611e+08	3.16874e+08	2.89731e+08	2.44229e+08					0.679642	0.732111	1.17396	1.0734	0.904821
NV2t003510001.1		15	7.44191	5.5216e+08	4.66834e+08	3.91844e+08	4.34729e+08	4.98183e+08	4.88281e+08	4.34746e+08	4.48428e+08	5.45096e+08					1.05243	1.03151	0.918412	0.947316	1.15153
NV2t003513001.1		8	6.60442	5.11888e+07	5.33868e+07	4.71663e+07	6.76967e+07	5.02708e+07	7.73585e+07	4.01509e+07	5.181e+07	3.81098e+07					0.948231	1.45917	0.757343	0.977263	0.718843
NV2t003514001.1		6	6.19007	2.51963e+07	2.12006e+07	2.42828e+07	8.08971e+07	1.09896e+08	6.86323e+07	5.14863e+07	4.50149e+07	6.29322e+07					2.02041	1.26178	0.946558	0.827584	1.15699
NV2t003516001.1		6	6.71987	9.58584e+07	1.02216e+08	1.23577e+08	1.2929e+08	1.15919e+08	1.11622e+08	1.93098e+08	2.01848e+08	1.7339e+08					0.836746	0.805728	1.39385	1.45702	1.2516
NV2t003517001.1		5	5.75788	1.14556e+07	1.42423e+07	1.10209e+07	1.10592e+07	9.33809e+06	1.17396e+07	1.6407e+07	1.56192e+07	1.60562e+07					0.718696	0.903525	1.26275	1.20211	1.23574
NV2t003521001.1		15	6.54141	1.01869e+08	8.11277e+07	9.03629e+07	1.02069e+08	1.0369e+08	1.0643e+08	1.12088e+08	1.38457e+08	1.2111e+08					0.974934	1.0007	1.0539	1.30183	1.13872
NV2t003523001.1		14	6.86577	1.24064e+08	1.19321e+08	1.38918e+08	8.83359e+07	9.4421e+07	8.79381e+07	1.07301e+08	1.0431e+08	9.6203e+07					0.884448	0.823723	1.00509	0.977082	0.901141
NV2t003524001.1		11	6.65388	8.42998e+07	7.81627e+07	7.98312e+07	1.21438e+08	1.49617e+08	1.11073e+08	1.27459e+08	1.11506e+08	1.47065e+08					1.33262	0.98932	1.13527	0.993173	1.30989
NV2t003538001.1	Spermadhesin-like-2
NV2t003539001.1	Spermadhesin-like-3
NV2t003542001.1		24	6.77946	2.30788e+08	2.35394e+08	2.42056e+08	1.93182e+08	1.65297e+08	2.0207e+08	2.0193e+08	2.31231e+08	1.83951e+08					0.788839	0.96433	0.963662	1.1035	0.877862
NV2t003544001.1		2	6.17317	8.38009e+06	1.1629e+07	8.03152e+06	1.46852e+07	1.1885e+07	1.48292e+07	1.39519e+07	1.24149e+07	1.44074e+07					0.970522	1.21094	1.1393	1.01379	1.17649
NV2t003545001.1		4	6.12363	6.43044e+07	5.52039e+07	5.94282e+07	4.94444e+07	6.97504e+07	5.578e+07	6.14481e+07	5.07078e+07	5.89027e+07					1.19579	0.956283	1.05346	0.869327	1.00982
NV2t003551003.1		3	5.98812	1.44411e+07	1.31493e+07	1.49243e+07	3.13623e+07	3.26255e+07	2.56073e+07	4.50579e+07	4.75385e+07	5.33655e+07					1.05595	0.828799	1.45833	1.53862	1.72721
NV2t003553001.1		6	6.97558	8.55252e+07	8.86947e+07	7.83192e+07	3.74313e+07	3.69535e+07	4.49455e+07	4.99321e+07	4.87396e+07	4.5383e+07					0.644632	0.784049	0.871037	0.850234	0.79168
NV2t003555001.1		3	6.43524	6.84813e+07	5.55769e+07	6.00712e+07	6.39847e+07	9.39112e+07	7.60103e+07	1.23855e+08	1.03914e+08	1.18785e+08					1.10543	0.89472	1.4579	1.22318	1.39822
NV2t003560001.1	Polydom3	18	6.80637	1.01108e+08	1.015e+08	9.35202e+07	6.29148e+08	6.68421e+08	4.91183e+08	1.12688e+09	1.05591e+09	1.55959e+09					1.03235	0.758614	1.74043	1.63082	2.40873
NV2t003561001.1	Polydom-like-1	5	6.45683	3.25794e+07	3.60629e+07	3.35455e+07	7.68606e+07	7.08969e+07	5.42882e+07	2.01284e+08	1.97012e+08	2.76602e+08					0.651672	0.499007	1.85016	1.8109	2.54248
NV2t003565001.1		5	6.49979	6.15477e+07	4.50847e+07	5.82328e+07	4.74696e+07	6.26737e+07	5.43625e+07	3.19001e+07	3.29633e+07	2.94233e+07					1.33141	1.15485	0.677672	0.700258	0.625055
NV2t003570001.1		3	5.93748	2.33714e+07	2.4425e+07	2.05415e+07	4.62787e+07	4.21974e+07	5.16788e+07	4.10803e+07	4.30828e+07	4.18306e+07					1.1354	1.39052	1.10534	1.15923	1.12553
NV2t003575002.1		16	6.81903	1.01187e+08	1.20451e+08	9.57319e+07	9.39447e+07	6.86805e+07	9.54048e+07	6.98031e+07	8.01594e+07	7.26078e+07					0.774622	1.07603	0.787283	0.904087	0.818916
NV2t003576001.1		5	6.28135	1.84816e+07	1.56731e+07	1.53325e+07	2.6193e+07	3.5426e+07	2.90582e+07	2.5926e+07	2.25897e+07	2.81527e+07					1.47041	1.20611	1.0761	0.937621	1.16852
NV2t003577001.1	Cytokine receptor-like-6
NV2t003578001.1		3	5.92001	1.17894e+07	1.29406e+07	1.24621e+07	7.01124e+07	5.73781e+07	6.7602e+07	6.79945e+07	7.56462e+07	6.66728e+07					1.16675	1.37465	1.38263	1.53822	1.35576
NV2t003580003.1		22	7.15669	3.96478e+08	4.08053e+08	4.2949e+08	2.24841e+08	2.08302e+08	2.26424e+08	4.34272e+08	4.55168e+08	3.97851e+08					0.58937	0.640645	1.22873	1.28786	1.12568
NV2t003582001.1	Matrix Metalloprotease-7	5	7.85833	2.42743e+08	3.73797e+08	2.29748e+08	1.97665e+08	1.4884e+08	5.45014e+08	2.70323e+08	2.32988e+08	1.03524e+08					0.571327	2.09206	1.03765	0.894332	0.397382
NV2t003585001.1		5	6.49455	3.71049e+07	4.38164e+07	3.39759e+07	2.33175e+07	3.11839e+07	3.74508e+07	4.888e+07	3.09317e+07	3.32163e+07					0.877384	1.05371	1.37528	0.870286	0.934567
NV2t003590006.1		8	6.91557	1.24086e+08	1.18573e+08	1.2099e+08	1.49893e+08	1.6366e+08	1.4219e+08	1.94033e+08	1.85854e+08	2.09651e+08					1.04543	0.908284	1.23945	1.1872	1.33922
NV2t003595001.1		2	5.96669	4.82668e+06	5.61069e+06	3.54227e+06	1.5868e+07	1.07126e+07	9.78246e+06	8.76987e+06	1.11681e+07	1.93719e+07					1.07541	0.982037	0.880386	1.12113	1.9447
NV2t003597001.1		24	6.90957	3.46804e+08	4.04248e+08	3.4276e+08	2.70479e+08	1.83588e+08	2.40633e+08	2.07542e+08	2.62155e+08	2.35894e+08					0.662478	0.868327	0.748917	0.94599	0.851227
NV2t003603001.1		7	6.84901	2.20778e+08	1.85849e+08	2.45804e+08	2.28095e+08	3.31778e+08	2.31061e+08	1.4809e+08	1.2087e+08	1.31226e+08					1.6197	1.12801	0.722957	0.590071	0.640631
NV2t003611003.1	Wnt5a
NV2t003615001.1		39	7.30319	7.40235e+08	6.88635e+08	7.19603e+08	3.79009e+08	3.82314e+08	4.28992e+08	3.76934e+08	4.01421e+08	3.42358e+08					0.771572	0.865776	0.760714	0.810134	0.690934
NV2t003621001.1		6	6.78159	9.71091e+07	1.0784e+08	8.57139e+07	1.36468e+08	1.70935e+08	1.53941e+08	1.9984e+08	1.43578e+08	2.00588e+08					1.18703	1.06902	1.38776	0.99706	1.39296
NV2t003622001.1		30	7.17228	4.89634e+08	5.47071e+08	4.62736e+08	4.94946e+08	4.05727e+08	5.11861e+08	4.50859e+08	4.91946e+08	4.61024e+08					0.846087	1.06741	0.940203	1.02588	0.961401
NV2t003625001.1	Suppressor of lurcher protein-like-7	2	6.40351	1.0108e+08	9.95515e+07	7.28072e+07	8.24171e+07	1.22919e+08	1.16282e+08	1.30089e+08	8.85075e+07	1.2793e+08					1.17491	1.11147	1.24343	0.845987	1.2228
NV2t003629001.1		2	6.17158	1.57494e+07	1.48998e+07	1.61259e+07	2.4014e+07	2.21058e+07	2.46001e+07	1.75714e+07	2.01639e+07	1.67422e+07					1.15688	1.28742	0.919579	1.05525	0.876185
NV2t003632001.1	Trypsin Inhibitor-like	19	7.79988	9.2761e+08	1.00072e+09	6.75272e+08	5.02229e+08	3.10944e+08	1.03489e+09	3.47244e+08	5.19555e+08	2.3135e+08					0.504251	1.67825	0.563117	0.842549	0.375174
NV2t003637001.1		7	6.09704	3.10778e+07	3.51406e+07	2.94895e+07	3.83245e+07	3.53515e+07	4.2704e+07	1.09066e+08	1.04502e+08	1.03091e+08					0.601731	0.72688	1.85646	1.77877	1.75475
NV2t003640001.1		24	7.17898	4.5402e+08	4.55705e+08	4.95858e+08	4.76118e+08	4.29274e+08	4.74358e+08	3.34831e+08	3.69762e+08	3.07532e+08					1.01738	1.12423	0.793553	0.876339	0.728853
NV2t003643001.1		5	6.25155	3.00922e+07	2.54811e+07	2.56233e+07	3.09148e+07	3.73357e+07	3.54546e+07	4.17867e+07	4.08358e+07	4.27651e+07					1.08293	1.02837	1.21203	1.18445	1.24041
NV2t003644001.1		6	6.77856	7.65695e+07	6.46151e+07	7.07089e+07	3.39214e+07	3.05611e+07	3.26475e+07	2.23591e+07	2.93904e+07	2.51419e+07					0.712722	0.76138	0.52144	0.685419	0.586339
NV2t003646001.1		11	6.72843	6.89662e+07	5.87841e+07	7.67461e+07	8.694e+07	1.44976e+08	7.08919e+07	1.23364e+08	8.67393e+07	1.35872e+08					1.52914	0.747735	1.30119	0.914886	1.43312
NV2t003648001.1	Coagulation factor-like-5	2	6.85017	1.38878e+08	1.41983e+08	1.28286e+08	9.64822e+07	1.2749e+08	1.9424e+08	2.89819e+07	2.14398e+07	1.5575e+07					1.28438	1.95685	0.291974	0.215992	0.156908
NV2t003651001.1		4	7.38835	9.92948e+06	8.77919e+06	9.84299e+06	4.56631e+07	3.61001e+07	3.95694e+07	2.7241e+08	3.89474e+08	3.16933e+08					0.287854	0.315517	2.17214	3.10557	2.52715
NV2t003652001.1		15	6.63705	1.21688e+08	1.15403e+08	1.05726e+08	2.4738e+08	2.8492e+08	2.16215e+08	3.12288e+08	2.8573e+08	4.11001e+08					1.22088	0.926481	1.33816	1.22435	1.76114
NV2t003657001.1		9	6.80297	1.08729e+08	1.08786e+08	1.20079e+08	1.82521e+08	1.82963e+08	1.37399e+08	1.17055e+08	1.16637e+08	1.40714e+08					1.35541	1.01787	0.867158	0.864061	1.04242
NV2t003664001.1		8	7.24157	1.21276e+08	1.22976e+08	1.12829e+08	3.07781e+08	2.56322e+08	2.76657e+08	3.45798e+08	4.09221e+08	4.13255e+08					0.974973	1.05232	1.31531	1.55656	1.5719
NV2t003668001.1		4	5.96986	2.42962e+07	2.57935e+07	2.81086e+07	3.65728e+07	3.33578e+07	3.25859e+07	5.61883e+07	5.7991e+07	5.4477e+07					0.859315	0.839432	1.44744	1.49388	1.40336
NV2t003669001.1	TIMP metalloprotease inhibitor-2	2	6.10116	7.93513e+06	8.06846e+06	7.35511e+06	1.15363e+07	8.76861e+06	8.65772e+06	9.73909e+06	1.25934e+07	1.39921e+07					0.890256	0.878997	0.988786	1.27857	1.42059
NV2t003671001.1	TIMP metalloprotease inhibitor-1	5	6.81533	1.10969e+08	1.50455e+08	1.49027e+08	4.0962e+07	4.01063e+07	4.96205e+07	8.14648e+07	6.13285e+07	5.00457e+07					0.49178	0.608443	0.998916	0.752005	0.613657
NV2t003683001.1		11	6.50018	8.01043e+07	8.72373e+07	7.35509e+07	1.223e+08	9.85153e+07	1.26194e+08	9.10076e+07	1.03677e+08	9.60005e+07					1.00916	1.2927	0.932256	1.06203	0.983402
NV2t003689003.1	Wnt8a-like
NV2t003691001.1		19	6.60883	2.42294e+08	2.70981e+08	1.99333e+08	1.11907e+08	1.04688e+08	1.46975e+08	1.58168e+08	1.5108e+08	1.46296e+08					0.615119	0.863588	0.929352	0.887709	0.859597
NV2t003692001.1		11	6.65327	9.4814e+07	1.42747e+08	8.27349e+07	9.06401e+07	6.56081e+07	1.10516e+08	8.37331e+07	7.67879e+07	7.86531e+07					0.714656	1.20383	0.912088	0.836436	0.856753
NV2t003693001.1		17	6.59052	1.62265e+08	2.10177e+08	1.37286e+08	1.05461e+08	9.21717e+07	1.39343e+08	1.0199e+08	9.00371e+07	9.1181e+07					0.734168	1.1099	0.812374	0.717165	0.726277
NV2t003694001.1		6	6.26959	4.51564e+07	4.27523e+07	4.84484e+07	3.15216e+07	2.69522e+07	2.638e+07	2.17255e+07	2.68208e+07	2.41815e+07					0.825238	0.807718	0.665206	0.821215	0.740404
NV2t003697002.1		4	6.35633	3.13565e+07	3.17792e+07	3.03478e+07	2.65027e+07	2.79395e+07	2.44231e+07	9.69541e+07	9.06873e+07	1.08641e+08					0.536575	0.469041	1.86199	1.74164	2.08644
NV2t003698001.1		2	6.06236	2.69317e+07	2.4162e+07	2.28457e+07	1.89895e+07	1.83329e+07	2.46323e+07	1.82621e+07	2.10712e+07	1.65866e+07					0.860188	1.15576	0.856864	0.988671	0.778251
NV2t003699001.1	Suppressor of lurcher protein-like-8
NV2t003706001.1	EGF-like repeat protein-10
NV2t003707001.1		7	6.2373	5.78132e+07	5.92098e+07	5.69236e+07	4.12099e+07	4.31239e+07	4.65244e+07	4.44074e+07	4.14094e+07	3.99254e+07					0.901446	0.972529	0.928276	0.865606	0.834587
NV2t003711001.1		5	6.92455	4.98956e+07	5.321e+07	1.06437e+08	1.82582e+08	2.00103e+08	1.19481e+08	1.79365e+08	1.53368e+08	1.28412e+08					1.53551	0.916848	1.37637	1.17688	0.985382
NV2t003713001.1		9	7.34576	1.66636e+08	1.62251e+08	2.60714e+08	2.01232e+08	2.40161e+08	1.38387e+08	1.71367e+08	1.47377e+08	1.59174e+08					1.31212	0.756074	0.936262	0.805192	0.869648
NV2t003717001.1		2	6.34494	2.81591e+07	2.52403e+07	2.79353e+07	6.44512e+07	9.26917e+07	6.40414e+07	6.28714e+07	4.8741e+07	6.37424e+07					1.7457	1.20612	1.18408	0.91796	1.20049
NV2t003719001.1	Veficolin-1-like 2	10	7.90417	5.96711e+08	3.62694e+08	2.70207e+08	1.00103e+08	1.52669e+08	2.61433e+08	1.15047e+08	1.24029e+08	9.72236e+07					0.660551	1.13114	0.497772	0.536634	0.420655
NV2t003722001.1		16	7.83435	6.81041e+08	6.56123e+08	7.42752e+08	2.90353e+08	2.93996e+08	2.7984e+08	2.8623e+08	2.93233e+08	2.72145e+08					0.697094	0.663528	0.678679	0.695284	0.645281
NV2t003723001.1		9	6.84193	1.12182e+08	9.72071e+07	9.94002e+07	7.7827e+07	8.78565e+07	7.16503e+07	8.16901e+07	8.34599e+07	1.00082e+08					0.974552	0.794784	0.906152	0.925783	1.11017
NV2t003726001.1		3	5.95021	1.05137e+07	9.18066e+06	9.88186e+06	2.22256e+07	2.01347e+07	1.84946e+07	1.32693e+07	1.67634e+07	1.69555e+07					1.31868	1.21127	0.869046	1.09788	1.11046
NV2t003734003.1		10	8.52599	3.42137e+08	1.22932e+09	4.12701e+08	2.88006e+08	1.54733e+08	3.26001e+08	2.43142e+08	1.25875e+08	1.7797e+08					0.422015	0.889124	0.663138	0.343306	0.485389
NV2t003735001.1	MASP-like serine protease	6	6.46723	4.93209e+07	4.87709e+07	4.42099e+07	4.52299e+07	4.65673e+07	5.48549e+07	5.69174e+07	5.58707e+07	5.23245e+07					0.923006	1.08727	1.12815	1.10741	1.03712
NV2t003736001.1	Cubilin-like-2
NV2t003736002.1		22	7.35614	2.63504e+08	4.9806e+08	3.11106e+08	2.31331e+08	1.45051e+08	2.49429e+08	2.44006e+08	2.05751e+08	1.9156e+08					0.557939	0.959426	0.938565	0.791419	0.736832
NV2t003739001.1		2	5.83894	1.50282e+07	1.4314e+07	1.56805e+07	7.61143e+06	8.47859e+06	8.28091e+06	1.12655e+07	1.06113e+07	9.91809e+06					0.75411	0.736528	1.00199	0.943795	0.882143
NV2t003740001.1		32	6.92226	5.00335e+08	3.5904e+08	5.32379e+08	5.11496e+08	9.19869e+08	5.32423e+08	3.47395e+08	2.69019e+08	3.13464e+08					1.93186	1.11816	0.729579	0.564979	0.65832
NV2t003745001.1		2	6.28886	8.63831e+06	7.99872e+06	6.33503e+06	6.31847e+06	7.40592e+06	8.45308e+06	5.10135e+06	4.69735e+06	5.19639e+06					1.10822	1.26491	0.763363	0.702908	0.777584
NV2t003748001.1		2	6.01535	1.38673e+07	1.26986e+07	1.57877e+07	1.30951e+07	2.89631e+07	1.21803e+07	1.22537e+07	6.04633e+06	1.15645e+07					2.06132	0.866882	0.872103	0.430322	0.823054
NV2t003750002.1		5	6.93439	2.15962e+08	1.93408e+08	2.09506e+08	1.28374e+08	1.67522e+08	1.14004e+08	1.18159e+08	1.01042e+08	1.3707e+08					1.08855	0.740796	0.767793	0.656565	0.890678
NV2t003754002.1		6	6.5009	6.33636e+07	5.51867e+07	6.53172e+07	1.1438e+08	1.21393e+08	8.36103e+07	1.44835e+08	1.56589e+08	1.92094e+08					1.09608	0.754932	1.30774	1.41387	1.73445
NV2t003759001.1	vWFA and PAN/Apple domain-containing protein
NV2t003762001.1		10	7.28158	1.97759e+08	1.67096e+08	2.04671e+08	6.67678e+07	6.05715e+07	7.64158e+07	1.19797e+08	1.56185e+08	1.01076e+08					0.473898	0.59786	0.937265	1.22196	0.790798
NV2t003763001.1		10	6.55921	9.28605e+07	1.15972e+08	8.62365e+07	1.93508e+08	1.4164e+08	2.31116e+08	1.09672e+08	1.19898e+08	9.88194e+07					1.07148	1.74834	0.829643	0.907007	0.747549
NV2t003768001.1	Fibulin	54	8.63361	3.03802e+09	3.70295e+09	3.44062e+09	9.28078e+08	8.19918e+08	1.13868e+09	9.90807e+08	9.19541e+08	7.12633e+08					0.470279	0.653109	0.568296	0.52742	0.408744
NV2t003770001.1		3	6.28323	4.01791e+07	3.29995e+07	3.13876e+07	4.08904e+07	5.78969e+07	6.04964e+07	3.6203e+07	3.11121e+07	3.13053e+07					1.43756	1.5021	0.898907	0.772501	0.777297
NV2t003774001.1		5	6.80553	5.53036e+07	4.37947e+07	5.37715e+07	1.75145e+08	2.16661e+08	1.33863e+08	1.21976e+08	1.24436e+08	1.64041e+08					1.7906	1.10631	1.00807	1.02841	1.35572
NV2t003775001.1		2	6.31152	2.96763e+07	2.60767e+07	1.72157e+07	6.38276e+07	7.2605e+07	6.49631e+07	7.55434e+07	7.55302e+07	1.27868e+08					1.18098	1.05668	1.22878	1.22856	2.07989
NV2t003781002.1		7	6.28575	4.96359e+07	6.04005e+07	6.76728e+07	1.25642e+08	1.06595e+08	9.85685e+07	8.54434e+07	8.27099e+07	7.98356e+07					1.26815	1.17265	1.01651	0.983986	0.94979
NV2t003783001.1		6	6.44483	6.87088e+07	6.72272e+07	3.479e+07	4.38868e+07	3.47098e+07	2.36191e+07	3.78805e+07	4.89205e+07	1.38926e+08					0.626444	0.42628	0.68367	0.88292	2.50734
NV2t003783005.1		2	6.36554	8.41662e+06	5.77335e+06	1.22796e+07	7.81279e+06	5.35051e+06	5.30728e+06	2.3301e+06	4.95702e+06	2.34964e+06					0.882327	0.875196	0.384245	0.817437	0.387468
NV2t003784001.1		4	6.02187	3.68543e+07	3.79983e+07	3.82507e+07	3.62247e+07	3.9869e+07	2.891e+07	3.21093e+07	2.82781e+07	3.87415e+07					1.13108	0.820178	0.910942	0.802253	1.0991
NV2t003785001.1		6	6.64438	7.06271e+07	6.08868e+07	7.99056e+07	4.48075e+07	4.55738e+07	4.1717e+07	4.70376e+07	5.3611e+07	4.46288e+07					0.839133	0.768119	0.866085	0.987119	0.821733
NV2t003790001.1		4	6.35957	4.16991e+07	4.81676e+07	4.07557e+07	3.80343e+07	3.53504e+07	4.47e+07	4.3581e+07	4.05673e+07	3.79177e+07					0.858082	1.08503	1.05787	0.984713	0.9204
NV2t003792001.1	Polydom1	32	7.00094	1.85581e+08	2.42458e+08	2.34733e+08	1.00473e+09	8.79293e+08	6.80243e+08	2.56043e+09	2.23796e+09	2.98812e+09					0.718536	0.555878	2.09232	1.8288	2.44182
NV2t003795001.1		3	6.12982	3.03351e+07	3.62146e+07	3.02364e+07	3.07978e+07	1.76892e+07	2.649e+07	1.65043e+07	2.40545e+07	1.92392e+07					0.687519	1.02958	0.641466	0.934916	0.747763
NV2t003799001.1		3	5.84997	7.94088e+06	1.05037e+07	8.37276e+06	5.49467e+06	4.90401e+06	7.211e+06	8.50093e+06	7.19627e+06	6.13975e+06					0.666065	0.979401	1.1546	0.9774	0.833903
NV2t003802001.1		5	5.96126	2.79602e+07	2.38389e+07	2.40303e+07	7.45275e+07	9.6036e+07	6.95837e+07	4.11339e+07	3.74163e+07	5.12306e+07					1.939	1.40492	0.830509	0.755449	1.03436
NV2t003804001.1		23	7.96306	9.03648e+08	5.98871e+08	7.73354e+08	2.37343e+09	3.53111e+09	1.74765e+09	1.99993e+09	2.02709e+09	3.17174e+09					1.85557	0.918375	1.05095	1.06522	1.66672
NV2t003808001.1		5	6.52174	5.32336e+07	5.35168e+07	4.57981e+07	2.71213e+07	2.57008e+07	3.2355e+07	9.14612e+07	9.5945e+07	8.90604e+07					0.449846	0.566315	1.60086	1.67934	1.55884
NV2t003810001.1	Cytokine receptor-like-2
NV2t003816001.1		3	6.24585	2.77252e+07	2.5023e+07	2.36229e+07	5.33891e+07	5.6038e+07	5.64139e+07	5.42638e+07	5.72456e+07	6.02362e+07					1.21834	1.22652	1.17977	1.2446	1.30962
NV2t003817004.1		5	6.29021	4.63997e+07	4.52445e+07	4.69749e+07	6.54051e+07	6.5204e+07	5.9076e+07	7.31522e+07	7.52039e+07	7.99496e+07					1.0543	0.955218	1.18282	1.21599	1.29273
NV2t003820001.1		2	6.06216	6.0848e+06	6.84517e+06	6.49561e+06	1.40468e+07	1.1913e+07	1.65646e+07	1.83973e+07	1.92708e+07	1.46055e+07					0.938657	1.30517	1.44958	1.5184	1.15081
NV2t003825001.1		3	6.03314	1.5901e+07	2.41674e+07	3.5565e+07	9.73058e+06	6.50586e+06	8.70803e+06	6.48927e+06	6.38191e+06	3.24008e+06					0.501784	0.671633	0.500505	0.492224	0.249901
NV2t003827001.1		2	5.60024	9.86952e+06	9.22152e+06	9.87093e+06	9.48214e+06	9.32157e+06	7.36292e+06	8.67245e+06	9.4358e+06	1.11603e+07					0.99404	0.785172	0.924819	1.00622	1.19012
NV2t003828001.1		18	6.95438	2.07786e+08	2.15143e+08	2.34555e+08	1.36723e+08	1.23526e+08	1.37291e+08	2.28847e+08	2.4448e+08	2.01769e+08					0.642577	0.71418	1.19045	1.27177	1.04959
NV2t003829001.1		3	6.33661	5.1524e+07	4.69227e+07	4.83767e+07	4.63185e+07	5.09093e+07	4.36359e+07	5.5334e+07	5.5246e+07	6.25194e+07					0.994352	0.852289	1.08077	1.07906	1.22112
NV2t003830001.1		17	6.97353	1.7146e+08	1.73187e+08	1.65484e+08	1.64158e+08	1.46842e+08	1.49772e+08	4.51168e+08	4.99027e+08	5.12053e+08					0.543155	0.553992	1.66883	1.84585	1.89404
NV2t003837001.1		7	7.32903	8.9259e+07	1.54979e+08	1.08924e+08	6.1578e+07	4.02191e+07	5.33704e+07	5.28907e+07	4.66099e+07	4.99774e+07					0.550272	0.730205	0.723642	0.637709	0.683782
NV2t003844001.1		5	6.16674	2.34176e+07	2.33174e+07	2.30812e+07	2.9594e+07	3.92104e+07	3.57365e+07	2.44722e+07	1.85381e+07	2.0549e+07					1.48327	1.35185	0.925747	0.701266	0.777335
NV2t003850001.1		15	6.75821	2.06832e+08	1.91102e+08	1.6915e+08	1.17944e+08	1.1785e+08	1.50745e+08	1.14881e+08	1.24357e+08	1.09841e+08					0.814194	1.04145	0.793677	0.859147	0.75886
NV2t003851001.1		4	6.24788	1.71844e+07	2.46399e+07	1.92178e+07	3.47688e+07	3.2801e+07	3.01823e+07	1.36476e+08	1.00828e+08	1.40497e+08					0.550151	0.50623	2.28904	1.69113	2.35647
NV2t003857001.1		3	6.0275	9.84934e+06	1.00162e+07	9.45816e+06	2.32068e+07	2.20927e+07	2.12778e+07	1.89424e+07	1.95539e+07	2.15012e+07					1.27541	1.22837	1.09354	1.12884	1.24126
NV2t003859001.1		3	5.96098	1.34656e+07	1.73384e+07	1.08202e+07	1.3707e+07	7.80996e+06	1.28723e+07	7.81107e+06	1.06401e+07	1.03449e+07					0.670641	1.10535	0.670737	0.913666	0.888318
NV2t003861001.1	Pentraxin domain-containing protein-2
NV2t003863001.1		8	6.6477	7.89031e+07	7.72113e+07	7.52885e+07	4.97192e+07	4.92181e+07	6.42408e+07	3.32146e+07	3.42662e+07	2.69244e+07					0.905881	1.18238	0.611329	0.630685	0.495555
NV2t003878001.1		18	7.34241	3.96059e+08	3.8034e+08	2.6112e+08	2.09837e+08	1.85133e+08	5.15919e+08	3.05003e+08	3.59762e+08	1.88046e+08					0.594812	1.65759	0.979941	1.15587	0.60417
NV2t003879001.1		62	7.47382	8.58079e+08	8.29658e+08	6.46882e+08	9.1253e+08	7.44547e+08	1.59467e+09	9.30355e+08	1.17858e+09	7.05774e+08					0.797627	1.70836	0.996681	1.2626	0.756089
NV2t003883001.1		4	7.6397	9.83052e+07	6.77171e+07	8.97332e+07	4.42989e+08	5.25766e+08	3.19986e+08	3.74076e+08	4.5726e+08	5.67e+08					1.60794	0.978607	1.14403	1.39843	1.73404
NV2t003885001.1		12	6.37896	6.55291e+07	6.44406e+07	5.58361e+07	6.30916e+07	6.46891e+07	8.11328e+07	6.81904e+07	6.75872e+07	6.21951e+07					0.982301	1.232	1.03547	1.02631	0.94443
NV2t003886001.1		4	5.92644	1.06796e+07	1.35122e+07	1.07595e+07	1.02017e+07	8.35169e+06	1.02605e+07	1.02284e+07	9.86866e+06	1.00882e+07					0.800053	0.982908	0.979832	0.945371	0.966401
NV2t003887001.1		7	7.24503	2.06689e+08	2.40229e+08	2.77706e+08	7.81765e+07	8.09422e+07	1.00633e+08	5.17034e+07	4.29376e+07	2.98761e+07					0.656943	0.816759	0.419635	0.34849	0.242481
NV2t003888001.1		2	6.47567	1.9081e+07	1.41972e+07	1.93824e+07	5.01079e+07	6.8738e+07	3.90997e+07	3.35749e+07	3.28736e+07	4.2333e+07					1.93696	1.10179	0.946103	0.926343	1.1929
NV2t003890001.1		3	5.78169	1.97881e+07	2.24195e+07	2.23783e+07	6.46198e+07	4.03106e+07	3.72448e+07	2.03818e+07	2.88197e+07	3.12504e+07					1.26316	1.16709	0.638675	0.903084	0.979252
NV2t003893001.1		8	6.85333	1.4624e+08	1.61287e+08	1.67782e+08	1.70044e+08	1.64958e+08	1.58344e+08	1.23242e+08	1.15117e+08	1.15286e+08					1.12276	1.07774	0.838823	0.783523	0.784673
NV2t003896001.1		5	6.05394	2.95694e+07	3.25323e+07	2.81191e+07	5.77045e+07	5.28823e+07	6.03734e+07	4.80199e+07	4.75963e+07	4.82352e+07					1.17507	1.34152	1.06702	1.05761	1.07181
NV2t003898001.1	CUB domain containing protein-3	9	7.10168	1.6859e+08	1.62709e+08	1.74572e+08	1.51365e+08	1.69741e+08	1.89618e+08	3.66421e+08	3.38349e+08	2.82307e+08					0.762435	0.85172	1.64587	1.51978	1.26805
NV2t003901001.1		4	6.20603	2.79222e+07	3.27165e+07	3.4661e+07	2.65077e+07	2.11672e+07	1.89717e+07	2.28573e+07	2.44142e+07	2.57122e+07					0.810899	0.726792	0.875648	0.935293	0.985016
NV2t003903002.1		25	7.1428	4.01855e+08	4.15026e+08	3.8806e+08	2.28626e+08	2.36644e+08	2.70573e+08	2.35356e+08	2.20026e+08	2.05815e+08					0.81853	0.935885	0.814073	0.761049	0.711892
NV2t003909001.1		5	7.63854	2.16489e+08	2.37209e+08	2.6677e+08	6.40614e+07	4.77742e+07	6.2019e+07	8.11051e+07	9.9193e+07	6.79451e+07					0.376318	0.488524	0.638866	0.781344	0.535204
NV2t003911002.1		4	6.83864	1.23081e+08	1.37428e+08	1.52231e+08	3.13939e+07	3.03821e+07	3.97898e+07	4.61596e+07	4.26905e+07	2.9428e+07					0.432258	0.566104	0.656729	0.607373	0.418682
NV2t003912001.1		7	6.75455	1.94218e+08	2.0506e+08	1.99626e+08	1.17408e+08	1.29189e+08	1.30143e+08	8.9619e+07	7.70914e+07	7.86118e+07					0.952282	0.959313	0.6606	0.568257	0.579464
NV2t003917001.1		2	6.28574	1.31542e+07	1.70509e+07	1.50466e+07	1.78641e+07	1.21082e+07	1.26591e+07	1.2973e+07	1.47565e+07	1.59949e+07					0.828024	0.865698	0.88716	1.00912	1.09381
NV2t003918001.1		2	6.16904	1.29224e+07	1.79765e+07	1.52216e+07	1.93239e+07	1.15033e+07	1.23968e+07	1.3004e+07	1.56933e+07	1.71983e+07					0.765523	0.824982	0.865392	1.04436	1.14452
NV2t003922001.1		4	6.27045	3.33375e+07	4.20758e+07	3.64181e+07	2.46411e+07	1.81936e+07	2.83514e+07	2.82493e+07	3.02953e+07	2.24619e+07					0.620179	0.966439	0.962956	1.0327	0.765676
NV2t003926001.1		22	6.85444	2.95904e+08	2.66299e+08	2.80931e+08	2.61344e+08	2.97365e+08	3.00212e+08	2.31614e+08	2.26045e+08	2.12246e+08					1.1283	1.1391	0.878819	0.857691	0.805331
NV2t003931001.1		3	5.7917	1.1197e+07	7.94005e+06	8.55613e+06	3.16864e+07	3.87439e+07	2.33437e+07	1.76493e+07	2.03423e+07	3.13322e+07					1.82763	1.10117	0.832552	0.959587	1.47801
NV2t003933001.1		2	6.32198	6.60185e+06	7.35486e+06	5.75284e+06	2.54381e+07	2.96389e+07	2.31172e+07	1.63208e+07	1.25655e+07	2.05974e+07					1.80986	1.41162	0.996606	0.767294	1.25775
NV2t003941001.1	Veficolin-1-like 1
NV2t003944001.1		8	6.3494	1.16089e+08	8.26161e+07	1.06981e+08	1.21245e+08	1.07296e+08	1.34734e+08	8.86664e+07	1.40699e+08	8.6531e+07					0.98051	1.23125	0.810268	1.28576	0.790754
NV2t003951001.1	CAPCL-like-1
NV2t003953001.1	Astacin Metalloprotease-16
NV2t003967003.1		6	6.41218	5.30375e+07	4.22627e+07	4.91179e+07	5.04066e+07	4.78358e+07	4.76625e+07	3.93832e+07	5.20472e+07	4.49474e+07					1.00896	1.0053	0.830674	1.09778	0.948033
NV2t003969001.1		2	5.61235	1.01572e+07	1.35499e+07	9.57969e+06	1.11202e+07	5.87443e+06	1.11167e+07	6.41163e+06	9.09237e+06	6.79616e+06					0.631672	1.19537	0.689437	0.977694	0.730785
NV2t003971001.1		2	5.90892	1.49044e+07	1.56643e+07	1.57929e+07	2.13345e+07	1.37229e+07	1.66571e+07	1.65838e+07	2.45159e+07	2.00335e+07					0.775749	0.941618	0.937473	1.38587	1.13248
NV2t003974001.1		4	6.22368	4.60752e+07	3.74956e+07	5.66771e+07	4.07602e+07	5.32448e+07	2.95748e+07	3.05373e+07	2.8708e+07	3.41936e+07					1.3413	0.745027	0.769274	0.723192	0.86138
NV2t003977005.1		7	6.96728	8.86516e+07	1.04483e+08	1.15484e+08	4.46827e+07	3.76008e+07	4.28899e+07	6.76599e+07	6.81778e+07	5.40781e+07					0.542573	0.618894	0.976323	0.983795	0.780339
NV2t003985001.1		13	7.15251	1.61094e+08	1.81078e+08	2.06251e+08	2.97823e+08	2.47141e+08	2.44945e+08	1.56749e+08	1.67942e+08	1.48771e+08					1.22766	1.21675	0.778642	0.834245	0.739012
NV2t003987003.1		3	5.8364	8.57867e+06	8.19542e+06	8.00984e+06	8.07282e+06	8.06802e+06	8.91117e+06	8.53222e+06	8.93088e+06	8.27347e+06					0.960828	1.06124	1.01611	1.06359	0.985295
NV2t003988001.1		3	6.65704	3.16222e+07	3.23775e+07	3.19917e+07	2.88951e+07	2.72189e+07	2.68781e+07	3.30515e+07	3.42467e+07	3.51002e+07					0.870596	0.859697	1.05715	1.09538	1.12268
NV2t003989001.1		2	5.64824	1.53367e+06	1.44125e+06	1.75359e+06			1.77103e+06	1.03717e+06	1.44414e+06	916283						1.25261	0.733568	1.0214	0.648065
NV2t003991001.1		7	6.67869	5.91561e+07	6.22026e+07	6.05398e+07	4.39443e+07	3.8648e+07	3.6754e+07	3.47528e+07	3.75562e+07	4.05775e+07					0.839908	0.798746	0.755256	0.81618	0.88184
NV2t003995001.1		7	7.37429	7.18783e+07	7.25612e+07	5.99589e+07	6.81866e+07	7.2421e+07	7.5367e+07	6.33714e+07	5.90672e+07	6.86901e+07					1.06588	1.10924	0.932691	0.869344	1.01097
NV2t003999001.1		2	6.29905	5.33912e+07	5.00958e+07	6.92594e+07	1.97321e+07	2.31264e+07	1.77364e+07	5.54813e+07	5.04202e+07	4.75537e+07					0.538107	0.412691	1.29094	1.17318	1.10648
NV2t004004001.1		2	6.6252	1.99071e+07	1.33537e+07	1.94596e+07	1.29539e+07	1.73648e+07	1.46668e+07	1.38161e+07	1.53548e+07	1.24756e+07					1.1215	0.947246	0.892303	0.991683	0.805732
NV2t004008001.1		5	6.21558	3.71503e+07	3.16756e+07	3.61763e+07	4.00279e+07	4.0742e+07	3.9485e+07	3.27095e+07	3.76667e+07	3.40315e+07					1.11228	1.07796	0.892984	1.02832	0.929075
NV2t004019001.1		2	6.06068	4.00201e+06	3.56752e+06	3.78533e+06	4.04985e+07	5.56603e+07	3.3498e+07	7.10074e+07	5.79208e+07	9.07062e+07					1.38901	0.835951	1.77201	1.44543	2.26359
NV2t004021003.1		24	7.74605	3.72358e+08	4.30393e+08	2.51637e+08	4.9087e+08	3.67211e+08	4.45562e+08	2.67669e+09	3.09365e+09	4.36094e+09					0.264618	0.32108	1.92887	2.22933	3.14257
NV2t004025001.1		13	6.92331	1.31918e+08	1.16803e+08	1.08467e+08	9.31194e+07	1.15831e+08	1.01893e+08	1.03197e+08	9.36395e+07	1.14632e+08					1.0643	0.936234	0.948209	0.860394	1.05328
NV2t004028001.1		4	6.1203	3.66439e+07	3.96168e+07	3.54831e+07	2.57505e+07	2.09025e+07	2.74508e+07	2.16356e+07	2.46378e+07	2.09469e+07					0.743369	0.976247	0.769438	0.87621	0.744945
NV2t004032001.1		11	6.773	1.27072e+08	1.39788e+08	1.26217e+08	9.22537e+07	7.31631e+07	9.4846e+07	1.32721e+08	1.52033e+08	1.29889e+08					0.616553	0.799277	1.11845	1.2812	1.09459
NV2t004033001.1	Alpha-N-acetylglucosaminidase	6	6.85093	7.4119e+07	6.62893e+07	8.37001e+07	4.0198e+07	4.06932e+07	3.88322e+07	8.14044e+07	8.9855e+07	7.45765e+07					0.621094	0.59269	1.24246	1.37144	1.13825
NV2t004039001.1		3	5.87642	2.7785e+07	2.72437e+07	2.33657e+07	2.61286e+07	2.03078e+07	2.53214e+07	1.9622e+07	2.57316e+07	2.40626e+07					0.832406	1.03791	0.804295	1.05473	0.986314
NV2t004040001.1		9	7.40246	2.65808e+08	2.24323e+08	2.9743e+08	2.06947e+08	2.57112e+08	1.98136e+08	1.70375e+08	1.62391e+08	1.58936e+08					1.19189	0.918499	0.789805	0.752796	0.736777
NV2t004041001.1	Astacin Metalloprotease-11	19	8.21441	1.02981e+09	1.20743e+09	1.02877e+09	2.78524e+08	2.32582e+08	4.24396e+08	3.8643e+08	3.94435e+08	2.53711e+08					0.399772	0.729468	0.664212	0.677971	0.436089
NV2t004042001.1		6	6.61879	9.82938e+07	8.81327e+07	1.10061e+08	4.00018e+08	3.91838e+08	2.95648e+08	2.13005e+08	2.4237e+08	2.57233e+08					1.68203	1.26912	0.914361	1.04041	1.10421
NV2t004044001.1		12	6.70831	1.80627e+08	1.78379e+08	1.72473e+08	1.2214e+08	1.23566e+08	1.40233e+08	1.25686e+08	1.25723e+08	1.14576e+08					0.866518	0.983402	0.881385	0.881643	0.803478
NV2t004045001.1		2	6.0111	1.33505e+07	1.61912e+07	1.50186e+07	1.13313e+07	1.01834e+07	1.04729e+07	1.00036e+07	9.17242e+06	9.61558e+06					0.870053	0.894781	0.854686	0.783673	0.821535
NV2t004046002.1		15	7.31827	2.62749e+08	2.4629e+08	2.96205e+08	3.22114e+08	4.04088e+08	3.07163e+08	4.46932e+08	3.79835e+08	4.15499e+08					1.18044	0.897299	1.3056	1.10959	1.21378
NV2t004048001.1		41	7.39238	9.40999e+08	8.54427e+08	1.07841e+09	1.29196e+09	1.42416e+09	1.06681e+09	1.01493e+09	1.01337e+09	1.07188e+09					1.31367	0.984046	0.936194	0.934752	0.988723
NV2t004051001.1		5	6.4092	3.56428e+07	2.20875e+07	4.38892e+07	1.68014e+08	3.15136e+08	9.25709e+07	6.19271e+07	5.32449e+07	9.12231e+07					3.20936	0.942745	0.630668	0.542248	0.92902
NV2t004066001.1		31	6.80992	2.37037e+08	2.85345e+08	2.47476e+08	5.3313e+08	4.86524e+08	5.69962e+08	1.58443e+09	1.44136e+09	1.41867e+09					0.643556	0.753926	2.09582	1.90658	1.87656
NV2t004066002.1	Thyroglobin, Thrombospondin type-1 and EGF-like domain repeat protein	31	6.80992	2.37037e+08	2.85345e+08	2.47476e+08	5.3313e+08	4.86524e+08	5.69962e+08	1.58443e+09	1.44136e+09	1.41867e+09					0.643556	0.753926	2.09582	1.90658	1.87656
NV2t004067001.1		12	6.51238	1.17638e+08	1.17584e+08	1.14783e+08	2.21169e+08	2.50079e+08	2.44092e+08	5.4141e+08	4.78738e+08	5.02468e+08					0.869684	0.848864	1.88283	1.66488	1.7474
NV2t004075001.1		21	6.56027	1.27166e+08	1.3601e+08	1.25266e+08	3.41901e+08	2.83004e+08	3.06768e+08	3.33337e+08	3.76284e+08	3.76921e+08					1.05833	1.1472	1.24656	1.40716	1.40955
NV2t004077001.1		7	6.59404	1.08028e+08	1.08229e+08	1.06025e+08	8.01071e+07	7.42672e+07	8.62694e+07	1.22112e+08	1.31388e+08	1.15463e+08					0.717258	0.833173	1.17934	1.26892	1.11512
NV2t004078001.1		10	6.60386	8.3536e+07	8.34341e+07	9.08316e+07	6.13917e+07	5.44996e+07	6.90768e+07	1.74966e+08	1.97209e+08	1.42925e+08					0.51207	0.649035	1.64396	1.85295	1.3429
NV2t004081001.1		6	6.609	1.06768e+08	1.17366e+08	1.16158e+08	1.0494e+08	7.98577e+07	9.65198e+07	7.83665e+07	9.36224e+07	7.82689e+07					0.824345	0.996342	0.808951	0.966433	0.807943
NV2t004083001.1		3	6.06615	7.37983e+06	7.09041e+06	8.1637e+06	1.35186e+07	8.77187e+06	8.29966e+06	5.1711e+06	8.28943e+06	7.60946e+06					1.06263	1.00542	0.626428	1.00418	0.921811
NV2t004092001.1		25	7.28977	2.78408e+08	3.34486e+08	2.93617e+08	3.98082e+08	3.42666e+08	3.72625e+08	3.73372e+08	3.60804e+08	3.7799e+08					0.984657	1.07074	1.07289	1.03678	1.08616
NV2t004097001.1		17	7.48069	3.13863e+08	2.78893e+08	5.16918e+08	2.32758e+08	2.35843e+08	1.64889e+08	2.12945e+08	2.36362e+08	1.82405e+08					0.893767	0.624876	0.806992	0.895734	0.691256
NV2t004101001.1		2	6.60052	2.55126e+07	2.28058e+07	2.70433e+07	1.67121e+07	1.27933e+07	1.33299e+07	1.10184e+07	1.60917e+07	1.30244e+07					0.727208	0.757709	0.626318	0.914695	0.740342
NV2t004107001.1		18	7.01303	3.97474e+08	4.42836e+08	3.8501e+08	6.57015e+08	3.9568e+08	6.40076e+08	2.49263e+08	3.71261e+08	2.63984e+08					0.936498	1.51493	0.589956	0.878702	0.624797
NV2t004109001.1		33	7.29012	6.48002e+08	6.51679e+08	7.75435e+08	4.05189e+08	4.85201e+08	4.02223e+08	4.50038e+08	3.73468e+08	3.78625e+08					0.955568	0.792149	0.886317	0.735518	0.745674
NV2t004114001.1		6	6.1324	2.60338e+07	3.39867e+07	2.55621e+07	2.30787e+07	1.95378e+07	2.16316e+07	2.70567e+07	2.44662e+07	2.93819e+07					0.762084	0.843754	1.05537	0.954322	1.14606
NV2t004121001.1		3	5.8784	9.48346e+06	9.29401e+06	9.192e+06	1.89742e+07	1.55316e+07	1.51297e+07	1.12094e+07	1.39642e+07	1.44947e+07					1.19195	1.16111	0.860249	1.07167	1.11238
NV2t004130001.1		12	6.70155	1.17495e+08	1.39692e+08	1.22127e+08	7.12418e+07	5.72388e+07	6.75425e+07	6.24627e+07	6.53491e+07	6.3347e+07					0.672084	0.793067	0.733422	0.767313	0.743805
NV2t004134001.1		13	6.68833	8.5693e+07	9.56164e+07	8.31634e+07	6.35662e+07	5.65415e+07	6.61116e+07	7.29999e+07	7.35054e+07	7.22807e+07					0.760105	0.888758	0.98136	0.988156	0.971691
NV2t004137001.1		2	6.30983	3.35652e+07	3.60661e+07	3.44753e+07	2.63922e+07	4.4157e+07	2.97613e+07	1.67385e+07	9.30485e+06	1.44431e+07					1.62273	1.0937	0.615127	0.341945	0.530772
NV2t004138001.1		7	6.88647	8.49333e+07	5.79249e+07	7.65609e+07	1.48498e+08	2.52759e+08	1.57976e+08	8.394e+07	7.22636e+07	8.74798e+07					2.22513	1.39072	0.738956	0.636164	0.770118
NV2t004142002.1		10	7.42152	2.97588e+08	3.21098e+08	3.27256e+08	1.67337e+08	1.50429e+08	1.68064e+08	2.32327e+08	2.39366e+08	2.10225e+08					0.640521	0.715608	0.989238	1.01921	0.895129
NV2t004147001.1		3	6.36836	3.00454e+07	2.78059e+07	2.58919e+07	5.72465e+07	4.77461e+07	5.16034e+07	4.81919e+07	6.23952e+07	6.20008e+07					1.04066	1.12473	1.05037	1.35994	1.35135
NV2t004148001.1		10	7.88061	3.56821e+08	3.46014e+08	4.48063e+08	3.20699e+08	3.00672e+08	2.24227e+08	2.7845e+08	3.06079e+08	3.16962e+08					0.933768	0.69636	0.864755	0.95056	0.984358
NV2t004152001.1		3	6.76496	3.78456e+07	3.39134e+07	3.8695e+07	8.94609e+06	1.56302e+07	1.33219e+07	1.30822e+07	8.35062e+06	8.5871e+06					0.788643	0.672176	0.66008	0.421342	0.433273
NV2t004165001.1		5	6.38452	2.88185e+07	2.83125e+07	2.4595e+07	2.43129e+07	1.94123e+07	2.37462e+07	2.60215e+07	3.31522e+07	3.11989e+07					0.729267	0.892083	0.977559	1.24544	1.17206
NV2t004170001.1		2	6.0732	1.11823e+07	1.34598e+07	1.17441e+07	5.03795e+06	4.16334e+06	5.30085e+06	5.26432e+06	5.289e+06	4.76104e+06					0.565991	0.720629	0.715664	0.719019	0.647244
NV2t004171001.1		7	7.34762	1.94898e+08	2.1396e+08	2.24195e+08	1.21657e+08	1.43596e+08	1.26219e+08	3.15198e+08	2.43095e+08	2.63946e+08					0.699801	0.615114	1.53608	1.18469	1.28631
NV2t004174001.1		4	6.89442	2.29526e+07	2.4464e+07	2.08988e+07	2.8917e+08	2.27736e+08	2.02261e+08	2.03727e+08	2.42549e+08	3.19697e+08					1.31939	1.17181	1.1803	1.40522	1.85218
NV2t004178001.1		11	7.12929	1.75574e+08	1.44954e+08	1.59459e+08	2.53022e+08	3.24829e+08	3.05058e+08	2.24663e+08	2.11832e+08	2.0505e+08					1.45849	1.36972	1.00874	0.951132	0.920681
NV2t004182001.1		4	6.27489	1.40456e+07	1.44483e+07	1.37607e+07	2.01228e+07	2.04033e+07	2.22267e+07	1.42637e+07	1.36669e+07	1.3173e+07					1.25678	1.3691	0.878602	0.841839	0.811416
NV2t004183001.1		2	6.35044	1.3338e+07	1.18985e+07	1.1921e+07	6.41601e+06	7.31351e+06	8.78137e+06	9.45048e+06	9.28791e+06	7.72098e+06					0.764232	0.917618	0.987538	0.97055	0.806812
NV2t004190001.1		14	7.08669	3.07558e+08	2.99948e+08	3.13977e+08	1.21763e+08	1.25116e+08	1.42526e+08	1.26156e+08	1.25811e+08	1.05511e+08					0.674936	0.768856	0.680548	0.678688	0.56918
NV2t004191001.1	Cadherin EGF LAG seven-pass G-type receptor-like-1
NV2t004204001.1		9	6.38473	8.09373e+07	8.35612e+07	6.99896e+07	6.24031e+07	5.66678e+07	7.06641e+07	5.8664e+07	6.25333e+07	5.98733e+07					0.842583	1.05069	0.872265	0.929796	0.890245
NV2t004212001.1		11	7.4586	2.94617e+08	2.99986e+08	3.1479e+08	4.89522e+08	4.51937e+08	4.3176e+08	3.25432e+08	3.45969e+08	3.45117e+08					1.23288	1.17784	0.887777	0.943801	0.941477
NV2t004213001.1		7	7.07422	6.51877e+07	6.92064e+07	6.99317e+07	9.10594e+07	5.8181e+07	6.64985e+07	4.73049e+07	6.96938e+07	6.03461e+07					0.8765	1.0018	0.71265	1.04994	0.909117
NV2t004214001.1		5	6.37088	2.69856e+07	2.40429e+07	2.42555e+07	4.11155e+07	4.63276e+07	4.92687e+07	4.1162e+07	4.09764e+07	3.81937e+07					1.25463	1.33428	1.11474	1.10971	1.03435
NV2t004216001.1		9	7.75151	4.83235e+08	3.72559e+08	5.83713e+08	5.27317e+08	1.03273e+09	4.72013e+08	2.60364e+08	1.72327e+08	2.40656e+08					2.24241	1.0249	0.565337	0.374179	0.522544
NV2t004217001.1		3	6.72884	6.67143e+06	7.00706e+06	6.97936e+06	1.62311e+07	2.23845e+07	1.11062e+07	1.90272e+07	1.31275e+07	2.65643e+07					1.56052	0.774258	1.32646	0.915174	1.85191
NV2t004221001.1		24	7.26235	5.00755e+08	4.27695e+08	5.42564e+08	3.59802e+08	4.20059e+08	3.5967e+08	2.23327e+08	2.23827e+08	2.0607e+08					1.15833	0.991806	0.615836	0.617214	0.568248
NV2t004224001.1		14	7.84893	5.79823e+08	5.36693e+08	5.51004e+08	3.60711e+08	3.73197e+08	3.61509e+08	3.73173e+08	3.89429e+08	3.91588e+08					0.857457	0.830604	0.857403	0.894752	0.899714
NV2t004237001.1		2	6.40489	2.90986e+07	3.52672e+07	3.16598e+07	3.85898e+07	3.63851e+07	3.79559e+07	1.55242e+08	1.35764e+08	1.44979e+08					0.507746	0.529666	2.16637	1.89455	2.02315
NV2t004240003.1		16	6.76151	1.81189e+08	1.8714e+08	2.52412e+08	1.99107e+08	1.66355e+08	1.49081e+08	1.18473e+08	1.37203e+08	1.13513e+08					0.995164	0.891825	0.708727	0.820768	0.679055
NV2t004241003.1		8	6.73491	5.4185e+07	4.47299e+07	5.75138e+07	2.81065e+08	4.05148e+08	2.55849e+08	1.09877e+08	9.22797e+07	1.13652e+08					2.57819	1.62811	0.699212	0.587229	0.723231
NV2t004247001.1		4	6.48487	1.72598e+07	2.11536e+07	2.08108e+07	6.19107e+07	6.81187e+07	4.12231e+07	1.34964e+08	1.00022e+08	1.68009e+08					0.96779	0.585673	1.91749	1.42106	2.38697
NV2t004249001.1		4	7.00668	1.4764e+08	8.72415e+07	1.26456e+08	2.68209e+08	7.09212e+08	4.02434e+08	6.07486e+08	3.88544e+08	4.7241e+08					1.98867	1.12845	1.70343	1.0895	1.32467
NV2t004255001.1		12	6.95083	1.47402e+08	1.21555e+08	1.29651e+08	1.83696e+08	2.21049e+08	1.80394e+08	2.84067e+08	2.86081e+08	3.28675e+08					1.05677	0.862407	1.35804	1.36767	1.5713
NV2t004256001.1		13	7.07448	1.84388e+08	1.71947e+08	1.95643e+08	1.07129e+08	1.39267e+08	1.31751e+08	1.02019e+08	8.41014e+07	7.81342e+07					1.04942	0.992782	0.768741	0.633729	0.588764
NV2t004263001.1		3	5.72268	7.89722e+06	5.39543e+06	6.94298e+06	1.70832e+07	2.37049e+07	1.84575e+07	1.26478e+07	1.33327e+07	1.33069e+07					1.7963	1.39866	0.95842	1.01032	1.00837
NV2t004267001.1		4	6.88248	6.47594e+07	1.05494e+08	8.40443e+07	5.25058e+07	3.53257e+07	4.68714e+07	3.27941e+07	2.99029e+07	2.82897e+07					0.662375	0.878861	0.614906	0.560693	0.530446
NV2t004268001.1		2	5.52997	1.00684e+07	1.14391e+07	8.32711e+06	6.18339e+06	6.6178e+06	9.05198e+06	7.23817e+06	5.94891e+06	5.97474e+06					0.840657	1.14987	0.919461	0.755687	0.758968
NV2t004274001.1		3	6.29603	2.57796e+07	3.08204e+07	2.74377e+07	1.07088e+07	1.17578e+07	1.28021e+07	3.4916e+07	2.65829e+07	2.74252e+07					0.508188	0.553325	1.50912	1.14895	1.18535
NV2t004276001.1		4	6.17708	1.7914e+07	1.28387e+07	1.16154e+07	2.48027e+07	3.74311e+07	2.56929e+07	2.77618e+07	2.56515e+07	4.13075e+07					1.49714	1.02765	1.1104	1.02599	1.65219
NV2t004284001.1		17	6.92056	1.61026e+08	2.54699e+08	1.5073e+08	4.94077e+08	2.47379e+08	4.05195e+08	2.51361e+08	3.17193e+08	3.27236e+08					0.853391	1.39782	0.867129	1.09423	1.12888
NV2t004295001.1		3	6.47503	4.26809e+07	3.42127e+07	5.3513e+07	7.02109e+07	1.03134e+08	5.29764e+07	3.1166e+07	2.64519e+07	3.29243e+07					2.07526	1.066	0.627126	0.532268	0.662506
NV2t004299001.1		15	7.4463	3.52883e+08	3.25678e+08	3.33655e+08	3.82307e+08	4.00079e+08	3.36478e+08	3.78542e+08	3.91696e+08	4.54613e+08					1.07294	0.902375	1.01518	1.05046	1.21919
NV2t004306003.1		4	6.96006	1.82828e+07	2.663e+07	1.59396e+07	3.19421e+07	1.28105e+07	3.28347e+07	1.24676e+07	2.13295e+07	1.39034e+07					0.619395	1.58758	0.602818	1.0313	0.672237
NV2t004310001.1		4	5.8452	1.58887e+07	2.18201e+07	1.77051e+07	5.36157e+07	3.10317e+07	3.36677e+07	3.68284e+07	4.63049e+07	5.26007e+07					0.902484	0.979146	1.07107	1.34667	1.52977
NV2t004312001.1		11	7.67926	1.13823e+08	1.158e+08	8.48716e+07	1.78786e+08	1.98048e+08	1.48e+08	1.65963e+08	1.47171e+08	2.68715e+08					1.25419	0.937248	1.05101	0.932003	1.70171
NV2t004314001.1		9	6.50247	9.24727e+07	8.31568e+07	1.07165e+08	6.84477e+07	8.15134e+07	8.23185e+07	1.03783e+08	9.68495e+07	7.44196e+07					0.928486	0.937656	1.18215	1.10317	0.847683
NV2t004315001.1		3	5.95559	1.63257e+07	1.83477e+07	1.81419e+07	2.62478e+07	1.79453e+07	1.81648e+07	1.58229e+07	2.05799e+07	2.05625e+07					0.938244	0.949719	0.827278	1.07599	1.07508
NV2t004317002.1		4	6.45039	3.73477e+07	3.65551e+07	4.34926e+07	3.87701e+07	4.00584e+07	3.37021e+07	3.79114e+07	3.7464e+07	3.74281e+07					1.05192	0.88501	0.995544	0.983797	0.982853
NV2t004318001.1		4	6.50093	6.80905e+07	5.84969e+07	5.50762e+07	3.00353e+07	2.85759e+07	3.67744e+07	4.49546e+07	5.49649e+07	4.53652e+07					0.608957	0.783668	0.95799	1.17131	0.966739
NV2t004319001.1		3	6.04127	1.17466e+07	1.44259e+07	1.07654e+07	2.83212e+07	2.03666e+07	2.0503e+07	2.00062e+07	2.26387e+07	3.01357e+07					1.02454	1.0314	1.00641	1.13883	1.51597
NV2t004321001.1		3	5.95822	1.04079e+07	9.19936e+06	8.83625e+06	2.33814e+07	2.52492e+07	2.35216e+07	3.94543e+07	4.13093e+07	4.6167e+07					0.998753	0.930416	1.56065	1.63403	1.82618
NV2t004332001.1		10	7.03395	1.0012e+08	9.23006e+07	8.4778e+07	9.07526e+07	9.28665e+07	1.20361e+08	1.18562e+08	1.25599e+08	1.05509e+08					0.897889	1.16373	1.14633	1.21436	1.02013
NV2t004335001.1		7	6.50675	9.14592e+07	8.28183e+07	7.354e+07	7.08329e+07	7.04327e+07	8.58612e+07	5.57331e+07	6.18586e+07	5.7147e+07					0.975698	1.18943	0.772065	0.856922	0.791653
NV2t004336001.1		4	6.61024	8.74148e+07	9.04071e+07	9.92534e+07	7.44643e+07	5.3949e+07	5.54276e+07	3.68227e+07	4.91121e+07	4.35427e+07					0.822402	0.844943	0.561328	0.748668	0.663768
NV2t004339001.1		12	7.58349	1.98386e+08	1.58262e+08	1.93822e+08	2.63729e+08	3.46889e+08	2.4173e+08	1.59437e+08	1.51851e+08	1.77936e+08					1.65007	1.14985	0.758407	0.722318	0.846399
NV2t004343001.1		2	5.75231	3.7654e+06	5.75309e+06	5.55253e+06	8.15271e+06	7.4508e+06	6.87581e+06	1.30252e+07	9.32223e+06	1.0467e+07					0.952994	0.87945	1.66599	1.19236	1.33878
NV2t004344001.1		19	7.85917	4.46818e+08	4.29448e+08	4.63723e+08	2.10836e+08	1.9081e+08	2.24114e+08	3.05041e+08	3.50467e+08	2.7634e+08					0.59266	0.696104	0.947463	1.08856	0.858319
NV2t004352001.1		4	6.77494	5.1162e+07	7.51842e+07	5.72206e+07	5.06911e+07	2.81716e+07	7.81874e+07	1.38046e+08	1.68924e+08	7.99747e+07					0.348485	0.967186	1.70764	2.0896	0.989295
NV2t004357001.1		2	6.25731	2.63227e+07	2.38281e+07	2.62722e+07	1.30249e+07	1.91355e+07	1.23816e+07	1.00369e+07	7.54228e+06	1.05723e+07					1.15493	0.747296	0.60578	0.455218	0.638099
NV2t004360001.1		9	7.93732	2.37194e+08	1.79909e+08	2.31721e+08	5.83807e+08	5.77233e+08	3.35796e+08	5.08363e+08	6.77436e+08	9.04159e+08					1.22653	0.713512	1.08019	1.43944	1.92119
NV2t004361001.1		10	6.9705	1.40144e+08	1.11425e+08	1.29378e+08	2.74655e+08	3.52184e+08	2.2564e+08	3.24923e+08	3.18504e+08	4.28158e+08					1.37512	0.88102	1.26867	1.24361	1.67176
NV2t004363001.1		5	6.52373	2.62375e+07	2.45954e+07	2.99551e+07	4.20145e+07	4.73737e+07	2.80812e+07	2.84055e+07	2.6857e+07	3.72028e+07					1.46656	0.869319	0.879358	0.831421	1.1517
NV2t004371002.1		9	7.96206	2.31029e+08	1.99518e+08	2.0545e+08	2.47271e+08	2.94927e+08	2.53952e+08	6.61465e+08	6.41768e+08	7.23818e+08					0.767328	0.660721	1.72097	1.66973	1.8832
NV2t004373001.1		13	7.67516	3.31238e+08	3.67601e+08	3.24217e+08	3.55647e+08	3.39298e+08	5.45891e+08	2.91327e+08	2.74983e+08	1.93793e+08					1.00982	1.62468	0.867045	0.818404	0.576765
NV2t004375001.1		23	7.93177	6.28016e+08	7.52471e+08	9.31035e+08	3.64054e+08	2.93302e+08	3.47734e+08	2.56617e+08	2.65669e+08	1.81112e+08					0.656645	0.778507	0.574513	0.594781	0.405473
NV2t004377001.1		6	6.90482	1.15831e+08	1.07167e+08	1.48784e+08	1.21006e+08	1.11347e+08	1.25485e+08	7.09786e+07	8.33195e+07	5.3254e+07					1.06931	1.20507	0.681633	0.800146	0.511416
NV2t004382001.1		31	7.22573	6.28981e+08	5.84194e+08	6.19765e+08	2.297e+08	2.9568e+08	2.95413e+08	4.23353e+08	3.53873e+08	3.33875e+08					0.706837	0.706198	1.01204	0.845949	0.798141
NV2t004389001.1		2	6.65169	2.20734e+07	2.89433e+07	2.0692e+07	6.51541e+07	4.8465e+07	3.35673e+07	3.65653e+07	3.74655e+07	7.5666e+07					1.18338	0.819621	0.892825	0.914804	1.84755
NV2t004391001.1		3	5.83172	2.06121e+07	1.52504e+07	1.39557e+07	2.47397e+07	3.61426e+07	3.18328e+07	1.67158e+07	1.5455e+07	1.91759e+07					1.67776	1.47769	0.775956	0.71743	0.890156
NV2t004392001.1		6	6.41163	3.81211e+07	4.36781e+07	4.10131e+07	4.12516e+07	3.02125e+07	3.7432e+07	3.10249e+07	3.6948e+07	3.17607e+07					0.820393	1.01643	0.842452	1.00329	0.862433
NV2t004395001.1		3	6.59267	4.44614e+07	4.90526e+07	4.29627e+07	1.73936e+07	1.31146e+07	2.03993e+07	1.05802e+07	1.27109e+07	9.33037e+06					0.536493	0.834496	0.432815	0.519977	0.381687
NV2t004410001.1		8	8.34343	3.58269e+08	3.9493e+08	5.22118e+08	9.28008e+07	8.3917e+07	8.72201e+07	7.41415e+07	7.43324e+07	5.40973e+07					0.433598	0.450666	0.383089	0.384075	0.27952
NV2t004411001.1		2	7.25166	2.84564e+07	5.75388e+07	6.64235e+07	1.50848e+07	1.0433e+07	9.289e+06	4.48245e+06	3.20325e+06	3.11661e+06					0.47416	0.422168	0.203719	0.145582	0.141644
NV2t004412001.1		4	7.00854	4.38669e+07	6.51631e+07	6.0074e+07	5.05949e+07	3.19401e+07	4.85145e+07	6.02822e+07	6.42422e+07	4.58789e+07					0.610895	0.927902	1.15297	1.22871	0.877493
NV2t004414001.1		3	6.36732	3.61498e+07	3.16114e+07	3.64046e+07	4.10819e+07	6.94584e+07	5.28883e+07	3.56319e+07	2.40853e+07	2.74675e+07					1.76201	1.34166	0.903906	0.610994	0.696793
NV2t004431001.1		15	6.53211	9.08907e+07	1.01926e+08	9.67165e+07	1.27469e+08	1.08276e+08	1.1838e+08	1.50669e+08	1.58073e+08	1.52373e+08					0.882066	0.964378	1.22742	1.28774	1.2413
NV2t004442001.1		3	7.48838	1.61814e+08	1.64898e+08	2.38167e+08	6.40269e+07	1.0352e+08	6.10497e+07	8.3216e+07	5.04743e+07	5.92596e+07					0.9445	0.557008	0.759251	0.46052	0.540675
NV2t004443002.1		7	6.20559	3.14789e+07	3.14185e+07	3.58748e+07	5.29854e+07	2.97625e+07	3.87497e+07	2.46572e+07	4.39531e+07	2.95665e+07					0.841154	1.09515	0.696867	1.24221	0.835615
NV2t004447001.1		4	6.31739	4.23271e+07	4.08923e+07	3.88366e+07	1.6536e+07	1.72477e+07	1.67643e+07	1.30986e+07	1.29906e+07	1.40731e+07					0.729576	0.709127	0.55407	0.549501	0.595289
NV2t004451001.1		23	7.60978	7.59486e+08	6.78829e+08	1.00115e+09	4.11973e+08	4.81304e+08	3.45215e+08	2.88424e+08	2.76035e+08	2.60958e+08					0.961888	0.689913	0.576416	0.551658	0.521526
NV2t004452001.1		8	7.59957	6.99119e+08	6.96378e+08	5.10665e+08	2.69049e+09	4.12528e+09	2.24209e+09	3.36798e+09	2.20384e+09	5.5297e+09					1.6826	0.914494	1.37372	0.898892	2.25543
NV2t004455001.1		36	7.02597	5.43879e+08	5.14462e+08	5.39535e+08	3.46333e+08	3.75222e+08	3.88139e+08	3.22277e+08	3.14275e+08	2.89706e+08					0.929321	0.961315	0.798193	0.778374	0.717523
NV2t004456001.1		8	7.21026	1.49524e+08	9.95216e+07	1.48777e+08	5.90343e+07	1.02466e+08	5.94612e+07	8.85825e+07	7.66293e+07	8.83351e+07					1.05716	0.613472	0.913922	0.790599	0.911369
NV2t004459001.1		3	6.42301	2.99557e+07	2.08894e+07	3.29994e+07	5.9865e+07	1.20859e+08	4.17648e+07	2.70545e+07	1.92049e+07	3.51816e+07					2.80506	0.969335	0.627919	0.445735	0.816543
NV2t004461001.1		5	6.81701	1.02061e+08	9.18068e+07	1.08307e+08	9.55747e+07	1.44405e+08	1.27944e+08	3.0709e+08	2.25808e+08	2.1604e+08					0.915862	0.811461	1.94767	1.43215	1.3702
NV2t004462001.1		10	6.74289	1.58607e+08	1.37491e+08	1.29367e+08	1.20863e+08	1.42085e+08	1.34643e+08	9.68489e+07	9.49767e+07	1.06523e+08					1.14032	1.0806	0.777275	0.762249	0.854914
NV2t004463001.1		15	6.79083	1.69186e+08	1.48528e+08	1.57202e+08	2.92663e+08	3.92968e+08	3.12615e+08	2.62921e+08	2.22903e+08	2.64746e+08					1.59044	1.26523	1.06411	0.902145	1.07149
NV2t004469001.1		3	6.28233	2.38541e+07	2.3107e+07	2.40317e+07	2.45332e+07	2.59225e+07	2.83372e+07	1.59375e+07	1.55612e+07	1.36879e+07					1.19659	1.30806	0.735683	0.718311	0.631838
NV2t004472001.1		8	6.84084	1.17103e+08	1.26105e+08	1.11072e+08	1.18036e+08	1.23476e+08	7.67911e+07	5.15838e+07	4.57624e+07	8.3545e+07					1.30207	0.809773	0.543959	0.482571	0.880994
NV2t004479001.1		4	6.37783	4.50432e+07	4.66809e+07	4.50785e+07	3.14348e+07	2.79382e+07	3.52949e+07	2.86342e+07	3.1068e+07	2.54673e+07					0.794099	1.0032	0.813883	0.88306	0.723867
NV2t004481001.1		4	6.60157	9.31896e+07	8.06694e+07	9.40425e+07	5.17673e+07	6.01218e+07	4.77949e+07	3.50853e+07	3.48765e+07	3.7634e+07					1.01105	0.803754	0.59002	0.586509	0.632881
NV2t004482001.1		3	5.94434	2.99831e+07	3.56897e+07	2.55035e+07	3.83975e+07	2.40543e+07	4.58232e+07	1.65522e+07	2.21833e+07	1.62964e+07					0.8507	1.62057	0.585383	0.784531	0.576334
NV2t004484001.1		2	6.26602	2.84233e+07	2.79902e+07	2.71826e+07	9.30553e+06	1.04428e+07	1.03056e+07	2.13042e+07	1.92656e+07	2.01028e+07					0.539147	0.532061	1.0999	0.99465	1.03788
NV2t004486001.1		5	6.28153	2.70587e+07	2.72649e+07	2.29077e+07	3.25319e+07	2.848e+07	3.11465e+07	3.15924e+07	3.57916e+07	3.89536e+07					0.929614	1.01665	1.0312	1.16827	1.27148
NV2t004490001.1		5	6.55402	7.28033e+07	5.70561e+07	5.72302e+07	7.96508e+07	1.17791e+08	1.28062e+08	7.08956e+07	6.11323e+07	5.60599e+07					1.51299	1.64491	0.910628	0.785222	0.720069
NV2t004491001.1		4	6.32999	3.59429e+07	2.993e+07	3.41959e+07	3.08704e+07	3.75906e+07	3.21768e+07	3.68164e+07	3.62857e+07	3.71038e+07					1.08814	0.931423	1.06573	1.05037	1.07405
NV2t004492001.1		15	6.9121	2.02852e+08	1.70723e+08	1.5371e+08	1.70612e+08	1.75336e+08	1.6392e+08	1.26521e+08	1.46189e+08	1.73683e+08					1.06368	0.994429	0.767547	0.886862	1.05365
NV2t004498001.1		2	6.44336	1.40129e+07	1.2064e+07	1.3543e+07	2.44919e+07	2.89869e+07	3.00059e+07	2.78152e+07	2.72813e+07	2.34774e+07					1.29356	1.33903	1.24127	1.21744	1.04769
NV2t004502002.1		8	6.43145	1.08829e+08	1.10459e+08	1.12582e+08	4.86999e+07	5.90286e+07	6.85031e+07	4.14749e+07	3.36912e+07	2.84849e+07					0.868419	1.00781	0.610171	0.495659	0.419065
NV2t004509001.1		5	6.53568	6.42342e+07	7.33142e+07	5.26645e+07	4.45121e+07	4.80651e+07	6.58082e+07	8.29391e+07	6.72531e+07	6.83825e+07					0.762705	1.04426	1.31609	1.06718	1.08511
NV2t004511001.1	Nematogalectin-like
NV2t004517002.1		3	5.84236	1.4914e+07	1.76254e+07	1.17011e+07	1.15327e+07	1.20849e+07	1.58001e+07	1.48973e+07	1.20221e+07	1.38511e+07					0.874105	1.14283	1.07753	0.869564	1.00186
NV2t004518001.1		7	6.63847	1.02008e+08	1.09931e+08	1.01957e+08	8.37427e+07	9.79365e+07	9.47825e+07	1.2274e+08	9.7326e+07	1.08433e+08					0.959267	0.928374	1.20221	0.953287	1.06208
NV2t004522001.1	Wnt8a
NV2t004525001.1		17	6.52838	1.96269e+08	1.79231e+08	1.71918e+08	2.6365e+08	2.60838e+08	2.52499e+08	1.90705e+08	2.10952e+08	2.27195e+08					1.20186	1.16344	0.878711	0.972	1.04684
NV2t004526001.1		5	7.29392	9.99484e+07	9.15006e+07	8.6492e+07	5.85754e+07	5.71045e+07	5.88002e+07	4.30414e+07	4.81958e+07	4.95179e+07					0.866422	0.892149	0.653048	0.731253	0.751314
NV2t004529001.1		14	7.67538	3.99386e+08	5.78007e+08	5.62708e+08	1.55565e+08	1.84483e+08	1.58797e+08	2.13176e+08	1.24131e+08	1.48134e+08					0.657722	0.566147	0.760019	0.442553	0.528132
NV2t004530001.1		2	5.48261	4.44794e+06	5.83897e+06	6.64338e+06	3.36757e+07	2.94337e+07	2.42885e+07	1.7238e+07	1.50144e+07	1.59923e+07					1.73624	1.43273	1.01684	0.885671	0.943358
NV2t004531001.1		11	7.1466	2.92575e+08	2.79954e+08	3.65871e+08	8.22077e+07	9.42787e+07	8.7015e+07	1.29381e+08	1.17828e+08	9.76876e+07					0.548558	0.506294	0.752802	0.685578	0.568392
NV2t004532001.1		16	7.34967	4.71308e+08	3.62371e+08	5.3187e+08	2.07886e+08	2.87002e+08	2.064e+08	1.86467e+08	1.75557e+08	1.66324e+08					0.995313	0.715788	0.64666	0.608826	0.576806
NV2t004538001.1		2	6.0054	6.5848e+06	3.8658e+06	6.2008e+06	3.97322e+07	6.45958e+07	3.04756e+07	1.17005e+07	1.2251e+07	1.61893e+07					3.03432	1.43156	0.549617	0.575475	0.760474
NV2t004539001.1		6	6.2659	4.91492e+07	4.99855e+07	6.18073e+07	5.49069e+07	5.59052e+07	4.78779e+07	4.70464e+07	4.54046e+07	4.2878e+07					1.10591	0.947116	0.930668	0.89819	0.848208
NV2t004541001.1		2	6.28889	9.92499e+06	1.02189e+07	9.09956e+06	1.25423e+07	1.16254e+07	1.20952e+07	7.84525e+06	8.21537e+06	8.86788e+06					1.15695	1.2037	0.780753	0.817586	0.882524
NV2t004542002.1		3	7.12021	7.14433e+07	5.17265e+07	7.8093e+07	8.92711e+07	1.49037e+08	7.19877e+07	7.54471e+07	6.23783e+07	8.55427e+07					1.82512	0.88157	0.923934	0.763893	1.04757
NV2t004550001.1		2	5.816	1.40142e+07	1.37836e+07	1.58303e+07	1.07519e+07	8.78138e+06	8.83159e+06	9.70634e+06	1.20757e+07	1.0455e+07					0.75825	0.762586	0.838118	1.04271	0.902761
NV2t004551001.1		12	7.00565	1.70793e+08	1.74062e+08	1.53979e+08	1.58095e+08	1.45227e+08	1.86953e+08	1.70124e+08	1.81606e+08	1.59476e+08					0.871176	1.12148	1.02053	1.08941	0.956658
NV2t004552001.1		11	7.03862	1.42894e+08	1.46563e+08	1.61508e+08	1.07829e+08	1.25081e+08	1.03194e+08	8.7963e+07	7.38855e+07	8.12716e+07					1.09274	0.901528	0.768469	0.645483	0.710011
NV2t004558001.1		2	6.58703	3.73113e+07	3.29277e+07	3.42994e+07	5.37087e+06	4.25545e+06	1.28368e+07	6.79767e+06	9.71545e+06	3.092e+06					0.261237	0.788036	0.4173	0.596419	0.189814
NV2t004566001.1		2	6.22035	4.84762e+07	4.46533e+07	4.92446e+07	2.72087e+07	4.72347e+07	3.17036e+07	3.42238e+07	2.13882e+07	2.88959e+07					1.2765	0.85678	0.924886	0.578009	0.780901
NV2t004571001.1		2	6.52064	1.054e+07	8.85598e+06	1.20802e+07	5.3602e+06	6.48726e+06	4.29611e+06	9.26521e+06	9.10557e+06	1.00802e+07					0.767514	0.508277	1.09618	1.07729	1.1926
NV2t004573001.1		4	6.71808	5.93591e+07	6.35224e+07	5.89853e+07	6.11712e+07	6.54757e+07	7.14114e+07	9.55697e+07	8.33821e+07	8.23343e+07					0.919012	1.00233	1.34141	1.17035	1.15564
NV2t004574001.1		9	6.72466	8.12074e+07	8.63138e+07	6.32679e+07	7.6232e+07	7.46278e+07	8.85882e+07	7.57278e+07	7.27332e+07	8.35925e+07					0.956371	1.13528	0.970467	0.932091	1.07126
NV2t004575001.1		6	7.70581	2.29534e+08	2.45528e+08	3.17331e+08	2.61886e+08	1.96377e+08	1.8429e+08	1.63297e+08	2.03456e+08	1.6775e+08					0.897406	0.842169	0.746235	0.929755	0.766584
NV2t004576001.1		4	5.95046	4.11794e+07	4.44298e+07	3.67029e+07	3.36497e+07	2.7284e+07	3.66949e+07	2.6169e+07	2.98946e+07	2.6908e+07					0.81065	1.09026	0.777522	0.888214	0.799479
NV2t004577001.1		4	6.40312	3.85823e+07	4.06182e+07	3.32766e+07	1.78143e+07	1.41646e+07	1.77821e+07	1.60391e+07	1.91487e+07	1.8619e+07					0.590068	0.740767	0.668159	0.797698	0.775629
NV2t004587001.1		6	7.70465	3.21552e+08	2.0993e+08	1.4586e+08	2.38283e+08	4.57436e+08	3.18886e+08	2.47181e+08	1.97097e+08	4.06935e+08					1.61882	1.12851	0.874749	0.697508	1.44011
NV2t004589002.1		17	6.60816	1.23451e+08	1.50336e+08	1.18235e+08	2.13796e+08	1.31008e+08	2.00087e+08	1.312e+08	1.7571e+08	1.46286e+08					0.848187	1.29542	0.849432	1.1376	0.947101
NV2t004590001.1		3	6.58485	4.67873e+07	5.62133e+07	6.43987e+07	1.77835e+07	1.52876e+07	1.86417e+07	1.74813e+07	1.69149e+07	1.21087e+07					0.517994	0.631644	0.592327	0.573133	0.410282
NV2t004591001.1		2	5.59822	1.80533e+07	2.43486e+07	2.56034e+07	2.71925e+07	2.75491e+07	2.21989e+07	1.97415e+07	1.44388e+07	1.70411e+07					1.26393	1.01847	0.905727	0.662441	0.781831
NV2t004597001.1		5	6.63014	4.76617e+07	3.67219e+07	3.03583e+07	7.31479e+07	9.8343e+07	7.92904e+07	5.80037e+07	5.59609e+07	8.39591e+07					1.57084	1.26651	0.926499	0.89387	1.34109
NV2t004598001.1		6	5.79125	1.2018e+07	1.18503e+07	1.37052e+07	2.38179e+07	2.63635e+07	2.02832e+07	1.74209e+07	1.59515e+07	1.79277e+07					1.48911	1.14567	0.983997	0.900995	1.01262
NV2t004600001.1	Veficolin-1-like 3
NV2t004625001.1	Copine-2	7	6.71948	6.09248e+07	4.10155e+07	4.66423e+07	5.97676e+07	6.28206e+07	7.4161e+07	1.35137e+08	1.90858e+08	1.42173e+08					0.695003	0.820466	1.49506	2.11152	1.57291
NV2t004626001.1		2	5.96055	1.38054e+07	1.32464e+07	1.26307e+07	4.03484e+07	4.42297e+07	3.32311e+07	2.79595e+07	2.65655e+07	3.70826e+07					1.59803	1.20065	1.01018	0.959816	1.3398
NV2t004631001.1		33	7.65063	1.09392e+09	1.10543e+09	9.8383e+08	5.60374e+08	6.14239e+08	6.32859e+08	8.21484e+08	7.41174e+08	8.08307e+08					0.750941	0.773705	1.00431	0.906127	0.988201
NV2t004633001.1		2	6.56165	1.03848e+07	1.00311e+07	1.31654e+07	3.80397e+07	3.49857e+07	2.65442e+07	2.29786e+07	2.58491e+07	2.59592e+07					1.51426	1.14889	0.994564	1.11881	1.12357
NV2t004640001.1		2	6.29495	2.48811e+07	3.08279e+07	2.78291e+07	1.35735e+07	9.93937e+06	1.21249e+07	1.55942e+07	1.7177e+07	1.55986e+07					0.533911	0.651308	0.837669	0.92269	0.837908
NV2t004649003.1		4	6.69117	1.09248e+08	1.28715e+08	1.32028e+08	1.03673e+08	1.21089e+08	9.06893e+07	1.92982e+08	1.40149e+08	1.82437e+08					0.907401	0.679597	1.44615	1.05023	1.36713
NV2t004670001.1		3	5.95688	1.05317e+07	1.23884e+07	9.07521e+06	1.74247e+07	1.69396e+07	1.40556e+07	1.40641e+07	1.22909e+07	2.02213e+07					1.20052	0.996133	0.996736	0.871064	1.4331
NV2t004674001.1		4	5.82637	3.4599e+07	3.96353e+07	3.57994e+07	1.29333e+07	1.02614e+07	1.37973e+07	1.82462e+07	2.00624e+07	1.65201e+07					0.45752	0.615175	0.813534	0.894513	0.736576
NV2t004680001.1		3	7.28088	1.06128e+08	7.31934e+07	9.25591e+07	1.66758e+08	3.14745e+08	1.84095e+08	1.80887e+08	1.38874e+08	1.87761e+08					1.96035	1.14661	1.12663	0.864958	1.16944
NV2t004681001.1		3	6.18393	2.69277e+07	2.52242e+07	2.95458e+07	3.46237e+07	4.99066e+07	3.0227e+07	2.55937e+07	1.89433e+07	2.67025e+07					1.67788	1.01625	0.860471	0.636882	0.89775
NV2t004683002.1	Contactin-associated protein-like-2
NV2t004685001.1		12	7.02481	2.55734e+08	2.39728e+08	2.44655e+08	3.1546e+08	3.67806e+08	2.67344e+08	2.34735e+08	2.14635e+08	2.89351e+08					1.36255	0.990389	0.869588	0.795124	1.07191
NV2t004689001.1		4	6.67178	3.50872e+07	2.56421e+07	3.08151e+07	7.61012e+07	8.72771e+07	4.13836e+07	2.6972e+08	3.21607e+08	5.64417e+08					0.540955	0.256501	1.67176	1.99336	3.49833
NV2t004693001.1		3	6.19019	2.99408e+07	3.73629e+07	2.72954e+07	6.63674e+07	3.57621e+07	4.7931e+07	2.45757e+07	3.65245e+07	3.7304e+07					0.93819	1.25743	0.644722	0.958191	0.978641
NV2t004704001.1	Contactin-associated protein-like-3
NV2t004709001.1		7	6.60239	7.0801e+07	5.3082e+07	5.6436e+07	5.66393e+07	7.6561e+07	5.58359e+07	5.92217e+07	5.83996e+07	7.53196e+07					1.22542	0.893698	0.947891	0.934732	1.20555
NV2t004713001.1		8	7.37554	2.98374e+08	2.18581e+08	3.2533e+08	2.15677e+08	3.38485e+08	1.56694e+08	1.24259e+09	1.08011e+09	1.56768e+09					0.559632	0.259069	2.05443	1.78579	2.59191
NV2t004714001.1		5	6.32228	3.17391e+07	2.5909e+07	2.72139e+07	3.05866e+07	3.16751e+07	3.50999e+07	4.54564e+07	5.37376e+07	4.61702e+07					0.870227	0.96432	1.24885	1.47636	1.26846
NV2t004715001.1	Cadherin-1	94	7.43401	1.87418e+09	1.85889e+09	1.9691e+09	8.73049e+08	8.42015e+08	9.19645e+08	1.37296e+09	1.43436e+09	1.23982e+09					0.611928	0.668345	0.99779	1.04241	0.901031
NV2t004724001.1		2	6.0392	1.15771e+07	1.05036e+07	8.71419e+06	1.94258e+07	2.17869e+07	1.638e+07	1.40826e+07	1.3831e+07	2.21748e+07					1.416	1.06459	0.915272	0.898924	1.44121
NV2t004726001.1		3	5.73547	1.95667e+07	1.33004e+07	2.12443e+07	1.74284e+07	2.80748e+07	2.22658e+07	9.76831e+06	8.91531e+06	7.03804e+06					1.71186	1.35765	0.59562	0.543609	0.429142
NV2t004727001.1		3	6.42276	3.0428e+07	2.68335e+07	3.03835e+07	8.10795e+07	1.31179e+08	7.09035e+07	3.82e+07	2.67567e+07	4.37202e+07					2.46225	1.33087	0.717022	0.502228	0.820636
NV2t004734001.1		8	6.18038	9.94785e+07	8.73874e+07	9.39861e+07	1.03254e+08	1.22017e+08	1.13295e+08	1.14646e+08	1.1037e+08	1.10525e+08					1.14995	1.06774	1.08048	1.04019	1.04164
NV2t004736001.1		4	6.35244	4.12758e+07	4.05853e+07	4.09325e+07	2.25818e+07	2.2873e+07	2.89377e+07	2.47467e+07	2.48316e+07	1.94615e+07					0.773243	0.978265	0.836582	0.839453	0.657915
NV2t004738001.1		8	7.94625	4.91985e+08	3.58163e+08	4.6686e+08	1.00071e+09	1.27728e+09	6.79837e+08	1.13185e+09	1.21733e+09	1.75468e+09					1.372	0.730248	1.21578	1.3076	1.88479
NV2t004746001.1		4	6.47103	2.60992e+07	2.12235e+07	2.57391e+07	3.85239e+07	4.58106e+07	2.89263e+07	1.67009e+07	1.726e+07	2.25399e+07					1.69792	1.07212	0.619003	0.639726	0.835417
NV2t004747001.1		11	7.37673	3.9265e+08	3.15399e+08	4.17291e+08	2.59316e+08	3.77289e+08	2.24352e+08	2.44045e+08	2.08687e+08	2.65262e+08					1.25563	0.746652	0.812192	0.69452	0.882804
NV2t004753001.1	Fibrinogen-related protein-19
NV2t004755002.1		5	6.98686	7.04939e+07	6.357e+07	7.10714e+07	5.18271e+08	5.20361e+08	3.30566e+08	3.28025e+08	3.62063e+08	5.09802e+08					1.68813	1.07241	1.06416	1.17459	1.65387
NV2t004756001.1		10	7.50658	1.50249e+08	1.47927e+08	1.68385e+08	1.42e+08	1.2733e+08	1.13151e+08	1.00367e+08	1.13616e+08	1.12322e+08					0.975005	0.866436	0.768543	0.869993	0.860087
NV2t004758001.1		6	6.74619	1.43019e+08	1.52587e+08	1.60195e+08	2.33711e+08	2.38423e+08	2.10937e+08	2.05152e+08	1.88369e+08	2.02809e+08					1.23663	1.09407	1.06407	0.977015	1.05191
NV2t004761001.1		4	6.5951	1.93328e+07	2.1172e+07	1.96181e+07	1.58517e+07	1.31685e+07	1.27314e+07	2.16626e+07	2.37961e+07	2.65636e+07					0.681534	0.658909	1.12114	1.23157	1.3748
NV2t004783002.1	Glycine-rich EGF-like repeat protein
NV2t004787001.1		2	5.83233	6.97474e+06	7.87764e+06	4.95911e+06	1.39829e+07	9.68186e+06	1.71748e+07	8.98249e+06	1.14787e+07	1.02794e+07					0.953443	1.69133	0.88457	1.13039	1.01228
NV2t004788001.1		2	5.97564	1.96432e+07	1.66894e+07	1.54343e+07	1.17083e+07	1.60741e+07	1.38691e+07	2.88004e+07	2.46753e+07	3.09247e+07					0.813562	0.701962	1.45769	1.2489	1.5652
NV2t004790001.1		2	5.67891	7.18719e+06	9.59891e+06	9.49468e+06	7.50619e+06	6.0234e+06	4.35785e+06	4.11475e+06	3.83693e+06	5.36176e+06					0.943093	0.682316	0.644253	0.600755	0.8395
NV2t004791001.1		22	6.90017	2.64085e+08	3.09226e+08	1.88612e+08	2.16037e+08	1.64752e+08	2.47062e+08	1.9545e+08	2.18739e+08	2.39151e+08					0.725738	1.08832	0.860966	0.963555	1.05347
NV2t004792001.1		4	6.4794	1.82845e+07	1.55655e+07	1.92064e+07	7.7389e+07	1.07531e+08	4.78744e+07	4.74092e+08	4.00547e+08	7.29146e+08					0.512151	0.228017	2.25801	1.90774	3.47279
NV2t004805001.1		2	5.92914	1.1778e+07	1.25132e+07	1.13831e+07	2.81399e+07	2.50772e+07	2.10769e+07	1.05095e+07	1.10931e+07	1.45094e+07					1.54501	1.29855	0.647489	0.683446	0.893921
NV2t004806001.1		26	6.74492	3.68608e+08	3.22934e+08	3.61121e+08	4.97174e+08	5.79066e+08	6.02121e+08	3.51096e+08	3.43862e+08	2.95734e+08					1.40032	1.45607	0.849035	0.83154	0.715156
NV2t004810001.1		5	6.616	6.65286e+07	8.60664e+07	7.67514e+07	7.63916e+07	4.55475e+07	7.49713e+07	4.54878e+07	5.89354e+07	4.01519e+07					0.718123	1.18203	0.717182	0.929203	0.633053
NV2t004825001.1		4	6.28192	1.84515e+07	1.49084e+07	1.65766e+07	3.47167e+07	4.82596e+07	2.72235e+07	2.00566e+07	1.78459e+07	2.84529e+07					1.91767	1.08177	0.79698	0.709135	1.13062
NV2t004845001.1		4	6.22314	3.16786e+07	3.41641e+07	3.98203e+07	2.68655e+07	2.86846e+07	2.45617e+07	2.60478e+07	2.26069e+07	2.26521e+07					1.0042	0.859865	0.91189	0.791429	0.793012
NV2t004846001.1		4	6.50179	4.80449e+07	4.34285e+07	4.70383e+07	4.90416e+07	5.107e+07	4.43504e+07	3.45902e+07	3.6724e+07	3.9044e+07					1.16856	1.0148	0.791473	0.840297	0.893382
NV2t004848001.1		4	6.77796	4.68328e+07	4.44787e+07	7.11924e+07	2.0118e+08	2.90146e+08	1.06491e+08	1.32292e+08	9.65226e+07	1.6431e+08					2.26392	0.830916	1.03224	0.753137	1.28207
NV2t004849001.1		19	6.93849	2.66894e+08	2.30221e+08	2.50542e+08	3.68504e+08	3.82636e+08	3.14458e+08	2.59193e+08	2.89201e+08	3.2337e+08					1.28257	1.05404	0.868797	0.969383	1.08392
NV2t004852001.1		3	6.10645	2.19404e+07	1.67511e+07	1.98392e+07	1.61358e+07	1.66094e+07	1.38034e+07	2.44799e+07	3.11296e+07	3.16281e+07					0.777282	0.645969	1.1456	1.45679	1.48012
NV2t004853001.1		8	6.1087	6.65194e+07	6.52179e+07	5.65957e+07	9.88087e+07	9.70429e+07	1.0624e+08	1.1024e+08	1.14414e+08	1.20434e+08					1.04533	1.1444	1.18749	1.23244	1.29729
NV2t004860001.1		8	6.4891	1.0035e+08	9.68344e+07	9.29903e+07	9.10993e+07	1.00397e+08	1.1059e+08	9.15456e+07	8.60287e+07	8.13304e+07					1.06157	1.16935	0.967979	0.909644	0.859966
NV2t004861001.1		2	7.00734	3.60287e+07	2.2784e+07	2.52145e+07	2.59918e+07	3.50329e+07	4.01042e+07	4.32453e+07	5.07042e+07	4.00242e+07					0.987987	1.13101	1.21959	1.42995	1.12875
NV2t004862001.1		7	6.28666	9.25161e+07	8.62131e+07	7.17097e+07	4.23671e+07	4.86389e+07	5.74733e+07	4.09151e+07	3.82207e+07	3.88888e+07					0.846805	1.00061	0.712333	0.665424	0.677056
NV2t004864002.1		3	5.8461	1.76724e+07	1.91419e+07	2.03276e+07	1.4913e+07	1.59666e+07	1.6834e+07	1.262e+07	1.08755e+07	9.71371e+06					1.04081	1.09735	0.822657	0.708937	0.633206
NV2t004869002.1		10	6.39689	6.36019e+07	7.45738e+07	6.41175e+07	8.77243e+07	8.3639e+07	8.84562e+07	9.20732e+07	8.23103e+07	9.05227e+07					1.03539	1.09503	1.1398	1.01895	1.12061
NV2t004873002.1		7	6.75769	8.92758e+07	8.10841e+07	6.78375e+07	1.24704e+08	1.20376e+08	1.29756e+08	1.12972e+08	1.28776e+08	1.42799e+08					1.08601	1.17064	1.01921	1.16179	1.28831
NV2t004874002.1		15	7.0951	2.0657e+08	2.23533e+08	2.01473e+08	1.47289e+08	1.28306e+08	1.42055e+08	2.73069e+08	2.89499e+08	2.90118e+08					0.607155	0.672217	1.29218	1.36993	1.37286
NV2t004877001.1		8	7.27234	1.23843e+08	1.59637e+08	1.39613e+08	6.87263e+07	5.3974e+07	5.1727e+07	9.79448e+07	9.66904e+07	1.15365e+08					0.535267	0.512983	0.971331	0.958891	1.14408
NV2t004879001.1		13	7.94231	6.59416e+08	5.20326e+08	4.04661e+08	1.4222e+08	1.58846e+08	1.64115e+08	2.4405e+08	2.76742e+08	3.44429e+08					0.490465	0.506735	0.753549	0.854492	1.06349
NV2t004881001.1		2	5.88878	1.05102e+07	1.09097e+07	1.12933e+07	1.30247e+07	1.11115e+07	1.19161e+07	9.25057e+06	1.04396e+07	9.4044e+06					1.0219	1.0959	0.850758	0.960115	0.864905
NV2t004885001.1		4	6.05896	2.15405e+07	1.11136e+07	1.10818e+07	2.18523e+07	7.48721e+07	3.34414e+07	1.8221e+07	1.03009e+07	2.31296e+07					2.98754	1.33438	0.727051	0.411026	0.922914
NV2t004887001.1		47	7.36896	8.5169e+08	1.04103e+09	8.51674e+08	3.92254e+08	3.39213e+08	4.47535e+08	5.18253e+08	4.89981e+08	4.53971e+08					0.566867	0.747886	0.866064	0.818818	0.758641
NV2t004889002.1		4	5.7634	2.10617e+07	1.99117e+07	1.75033e+07	1.19991e+07	1.4007e+07	1.39113e+07	1.40823e+07	1.27523e+07	1.46073e+07					0.901506	0.895345	0.906356	0.820752	0.940141
NV2t004894001.1		3	5.97571	1.24142e+07	6.75309e+06	9.28086e+06	2.33209e+07	3.25235e+07	2.01432e+07	2.63062e+07	3.46534e+07	4.07139e+07					1.42018	0.879577	1.14869	1.51318	1.77782
NV2t004895001.1		3	6.70984	4.10605e+07	4.03631e+07	4.66859e+07	2.44091e+07	3.62761e+07	2.78679e+07	2.1882e+07	1.49687e+07	1.68466e+07					1.20759	0.927692	0.72843	0.498293	0.560806
NV2t004898001.1		8	6.81548	1.03848e+08	1.20027e+08	1.13816e+08	7.55273e+07	6.19571e+07	8.73158e+07	1.4679e+08	1.54722e+08	1.15782e+08					0.569118	0.802056	1.34836	1.42123	1.06354
NV2t004905001.1		6	6.37472	3.76805e+07	3.39997e+07	3.31154e+07	4.40132e+07	5.23191e+07	4.85232e+07	2.993e+07	2.78866e+07	3.08721e+07					1.39171	1.29074	0.796153	0.741798	0.821213
NV2t004906001.1		16	7.50998	2.90083e+08	3.58004e+08	5.52399e+08	8.3115e+07	8.20786e+07	7.82682e+07	2.83435e+08	2.32414e+08	1.57963e+08					0.348816	0.332622	1.20454	0.987708	0.671306
NV2t004907002.1		7	6.47708	4.49065e+07	4.63164e+07	4.10727e+07	2.44822e+07	2.55939e+07	2.81427e+07	2.75099e+07	2.54978e+07	2.61498e+07					0.795194	0.874383	0.854722	0.792208	0.812465
NV2t004909002.1		4	5.88179	9.72132e+06	1.01445e+07	8.33173e+06	2.15266e+07	1.73762e+07	2.57448e+07	2.10821e+07	2.50123e+07	2.05555e+07					0.980504	1.45273	1.18962	1.4114	1.15991
NV2t004913001.1		11	6.63358	1.92417e+08	1.83051e+08	1.91628e+08	1.55856e+08	1.52098e+08	1.55615e+08	1.15369e+08	1.2419e+08	1.15953e+08					0.987524	1.01036	0.749053	0.806324	0.752848
NV2t004921001.1	Cadherin-3	18	6.61352	1.13639e+08	1.229e+08	1.34366e+08	2.91911e+08	3.25115e+08	2.5548e+08	4.05679e+08	3.36587e+08	3.91789e+08					1.23074	0.967129	1.53571	1.27417	1.48314
NV2t004933001.1	Fat-like cadherin-2	4	5.43623	1.13016e+07	1.04648e+07	9.77053e+06	1.22301e+07	1.10576e+07	1.36236e+07	1.47138e+07	1.75642e+07	1.52693e+07					0.857948	1.05705	1.14163	1.36279	1.18474
NV2t004933002.1		4	5.43623	1.13016e+07	1.04648e+07	9.77053e+06	1.22301e+07	1.10576e+07	1.36236e+07	1.47138e+07	1.75642e+07	1.52693e+07					0.857948	1.05705	1.14163	1.36279	1.18474
NV2t004934001.1	Protocadherin-like protein, partial
NV2t004938001.1		9	6.90099	7.76764e+07	8.80695e+07	7.31016e+07	4.79947e+07	4.21196e+07	5.70276e+07	5.61249e+07	5.63708e+07	5.01608e+07					0.69093	0.935482	0.920674	0.924708	0.822839
NV2t004940001.1		3	6.44543	2.41948e+07	2.73708e+07	2.99666e+07	7.12855e+07	8.85028e+07	6.14202e+07	5.61109e+07	3.99257e+07	5.25485e+07					1.76486	1.2248	1.11892	0.796169	1.04788
NV2t004943001.1		2	6.13741	1.51912e+07	1.1282e+07	1.48498e+07	1.85941e+07	2.30678e+07	1.77018e+07	2.20065e+07	2.38701e+07	2.36331e+07					1.21983	0.936071	1.16371	1.26225	1.24972
NV2t004944001.1		2	6.94796	2.71961e+07	3.1639e+07	2.76751e+07	1.45716e+08	1.61787e+08	1.13285e+08	3.31511e+08	2.5649e+08	4.18784e+08					0.961694	0.673387	1.97056	1.52463	2.48933
NV2t004953001.1	Ryncolin-like 4
NV2t004966001.1		25	7.64491	5.94146e+08	6.60878e+08	5.61821e+08	6.12294e+08	5.44946e+08	6.93503e+08	5.35396e+08	5.40479e+08	4.99599e+08					0.93543	1.19044	0.919036	0.927761	0.857588
NV2t004979001.1	Polycystin 1-like-1
NV2t004987001.1		10	6.7168	1.60785e+08	1.57795e+08	1.22712e+08	7.40126e+07	8.08467e+07	1.05788e+08	1.02195e+08	9.52689e+07	9.36261e+07					0.732729	0.958775	0.926209	0.86344	0.848551
NV2t005001001.1		5	6.655	5.8929e+07	5.49653e+07	6.5978e+07	3.08968e+07	3.42719e+07	3.9107e+07	2.49298e+07	2.40802e+07	1.75811e+07					0.87942	1.00349	0.639702	0.617901	0.451133
NV2t005002001.1		4	6.29392	3.54057e+07	2.69988e+07	4.37183e+07	5.28844e+07	6.06025e+07	4.93203e+07	3.92525e+07	4.48908e+07	3.40656e+07					1.40886	1.14657	0.91252	1.0436	0.791939
NV2t005003003.1		2	5.93787	3.99528e+07	2.63287e+07	2.21662e+07	2.20782e+06	4.5321e+06	7.03351e+06	5.986e+06	4.42227e+06	3.38474e+06					0.351585	0.545637	0.464375	0.343066	0.262577
NV2t005018001.1		2	5.75754	8.86341e+06	8.14334e+06	8.64657e+06	1.00522e+07	1.18379e+07	1.24891e+07	6.0236e+06	5.56374e+06	4.96687e+06					1.39112	1.46764	0.707857	0.653816	0.583676
NV2t005036001.1		3	5.79166	1.5695e+07	1.23728e+07	2.2856e+07	2.25708e+07	3.54765e+07	1.4788e+07	1.11177e+07	8.9669e+06	1.16454e+07					2.05345	0.855956	0.643513	0.519021	0.674058
NV2t005038002.1		14	7.35659	4.00549e+08	3.24983e+08	3.47978e+08	1.80003e+08	2.04398e+08	1.99104e+08	5.5527e+08	6.02321e+08	5.77496e+08					0.542314	0.528266	1.47325	1.59809	1.53223
NV2t005039001.1		12	7.23491	2.91253e+08	2.18547e+08	3.12099e+08	2.65826e+08	2.76854e+08	1.99317e+08	7.42138e+08	9.49034e+08	9.23114e+08					0.596357	0.429338	1.5986	2.04426	1.98843
NV2t005040001.1		7	7.26004	1.0838e+08	1.13943e+08	9.1915e+07	1.49075e+08	1.909e+08	1.72066e+08	1.93474e+08	1.43619e+08	1.97531e+08					1.26247	1.13792	1.27949	0.949789	1.30632
NV2t005041001.1		3	6.46468	3.12792e+07	3.66257e+07	3.63657e+07	1.96827e+07	1.34705e+07	1.70473e+07	1.47333e+07	1.83737e+07	1.46229e+07					0.599573	0.758776	0.655782	0.817818	0.650867
NV2t005043001.1		2	7.16726	4.90269e+07	3.50137e+07	3.79407e+07	1.33428e+08	1.7136e+08	1.05923e+08	9.59784e+07	1.04576e+08	1.56134e+08					1.73406	1.07188	0.971244	1.05825	1.57998
NV2t005056001.1		4	6.39706	4.28184e+07	4.13488e+07	5.18756e+07	3.65708e+07	2.82235e+07	2.32145e+07	3.31546e+07	4.44591e+07	4.3085e+07					0.736799	0.606034	0.865529	1.16064	1.12477
NV2t005058001.1		2	6.17547	1.31144e+07	1.03534e+07	1.03463e+07	2.95543e+07	3.07296e+07	3.09446e+07	3.88325e+07	4.72773e+07	4.69824e+07					1.0714	1.0789	1.35392	1.64835	1.63806
NV2t005059001.1		6	7.26249	9.33247e+07	9.73305e+07	8.35258e+07	6.5086e+07	7.54543e+07	6.90256e+07	6.72927e+07	5.56217e+07	7.08533e+07					1.00232	0.916925	0.893905	0.738871	0.941205
NV2t005063002.1		11	6.33809	7.88956e+07	9.21234e+07	7.03296e+07	1.63098e+08	1.32787e+08	1.77707e+08	1.12458e+08	1.1822e+08	1.15714e+08					1.12602	1.50694	0.953634	1.00249	0.981247
NV2t005071001.1		19	7.04847	2.49867e+08	1.91206e+08	1.99649e+08	2.65931e+08	3.24152e+08	3.63376e+08	1.80653e+08	1.93552e+08	1.65363e+08					1.36725	1.53269	0.761981	0.816388	0.697491
NV2t005073001.1		6	6.33043	4.75591e+07	7.39637e+07	5.20834e+07	1.49742e+07	8.93434e+06	1.72435e+07	1.76816e+07	1.90433e+07	1.40124e+07					0.302864	0.584534	0.599387	0.645548	0.475005
NV2t005076002.1		2	5.47539	9.13024e+06	6.54864e+06	7.65592e+06	1.27931e+07	1.6354e+07	1.36768e+07	1.28068e+07	1.39588e+07	1.42776e+07					1.37298	1.14822	1.07518	1.1719	1.19866
NV2t005082001.1		11	6.79939	2.1214e+08	1.90772e+08	2.00074e+08	2.27772e+08	2.42477e+08	2.14481e+08	1.61241e+08	1.68322e+08	1.81451e+08					1.21324	1.07316	0.806775	0.842204	0.907894
NV2t005089002.1		13	7.67891	5.35936e+08	6.06306e+08	6.58433e+08	3.23107e+08	2.35265e+08	2.41857e+08	1.81116e+08	2.19732e+08	1.96827e+08					0.661976	0.680525	0.509614	0.61827	0.553822
NV2t005090001.1		13	6.89775	1.86831e+08	1.83736e+08	1.53011e+08	9.78434e+07	9.80337e+07	1.22932e+08	1.05757e+08	1.07262e+08	1.02717e+08					0.761839	0.955329	0.821858	0.833556	0.798233
NV2t005093001.1		10	7.87241	2.53508e+08	3.67753e+08	2.69656e+08	2.28194e+08	1.66385e+08	4.87894e+08	5.89439e+08	5.56917e+08	2.59023e+08					0.471083	1.38137	1.66887	1.57679	0.733368
NV2t005101001.1		7	6.74778	8.01637e+07	6.94215e+07	8.40403e+07	1.98992e+08	2.16566e+08	1.68351e+08	2.36373e+08	2.50641e+08	2.66347e+08					1.24076	0.964518	1.35423	1.43598	1.52596
NV2t005102001.1		3	5.86876	9.44536e+06	7.42017e+06	7.44311e+06	1.35196e+07	2.0368e+07	1.76581e+07	1.02493e+07	8.65448e+06	9.95219e+06					1.75066	1.51774	0.880943	0.743865	0.855405
NV2t005109001.1		2	6.10837	1.52928e+07	1.41355e+07	1.37799e+07	1.83858e+07	2.2597e+07	2.21683e+07	1.72295e+07	1.51568e+07	1.58491e+07					1.31553	1.29057	1.00304	0.882377	0.922684
NV2t005129001.1		16	7.63077	4.96828e+08	4.50458e+08	6.82421e+08	8.18506e+08	9.02653e+08	6.65522e+08	4.07604e+08	4.07396e+08	3.64745e+08					1.56345	1.15272	0.705993	0.705633	0.63176
NV2t005141001.1		3	5.87993	7.65217e+06	6.42442e+06	5.31249e+06	4.6119e+06	5.30077e+06	8.29927e+06	7.12978e+06	7.38402e+06	5.7035e+06					0.825118	1.29186	1.10982	1.1494	0.887807
NV2t005141005.1	Astacin metalloprotease-8	3	5.87993	7.65217e+06	6.42442e+06	5.31249e+06	4.6119e+06	5.30077e+06	8.29927e+06	7.12978e+06	7.38402e+06	5.7035e+06					0.825118	1.29186	1.10982	1.1494	0.887807
NV2t005150001.1		6	6.58909	9.57233e+07	8.31237e+07	8.92305e+07	1.4133e+08	1.81293e+08	1.2899e+08	8.95959e+07	8.03817e+07	1.05247e+08					1.63998	1.16684	0.810484	0.727133	0.952063
NV2t005152001.1	Astacin Metalloprotease-17	27	7.4744	5.40021e+08	5.31817e+08	5.42867e+08	1.92072e+08	1.73277e+08	2.26239e+08	2.9918e+08	3.36535e+08	2.52514e+08					0.503953	0.657987	0.870125	0.978766	0.734402
NV2t005160002.1		6	6.68706	6.50832e+07	6.63824e+07	6.10919e+07	4.85386e+07	4.12937e+07	5.53184e+07	5.9926e+07	6.90177e+07	5.59832e+07					0.711096	0.952606	1.03195	1.18851	0.964054
NV2t005161001.1		17	7.57018	4.43216e+08	3.32281e+08	6.3776e+08	6.59105e+08	9.63573e+08	5.39969e+08	3.27782e+08	2.98875e+08	2.77887e+08					1.93556	1.08465	0.658425	0.60036	0.558199
NV2t005166001.1		7	6.57306	4.32401e+07	4.48003e+07	3.81949e+07	9.68645e+07	8.64905e+07	7.36834e+07	5.70264e+07	6.16033e+07	8.48187e+07					1.32672	1.13026	0.874754	0.944962	1.30107
NV2t005175001.1		3	5.72319	6.37108e+06	6.5954e+06	6.26955e+06	5.84916e+06	5.29289e+06	6.31549e+06	9.54628e+06	1.01843e+07	8.97918e+06					0.728341	0.869059	1.31364	1.40144	1.2356
NV2t005178001.1		6	6.49886	5.242e+07	5.9181e+07	5.76952e+07	4.70239e+07	4.92174e+07	4.98126e+07	7.00519e+07	5.92463e+07	6.00477e+07					0.877669	0.888283	1.2492	1.05651	1.0708
NV2t005179001.1		4	6.01441	1.50694e+07	1.76117e+07	1.84421e+07	2.25622e+07	1.71692e+07	1.70431e+07	2.15825e+07	2.42523e+07	2.33325e+07					0.87269	0.86628	1.09701	1.23272	1.18596
NV2t005181002.1		6	6.2617	4.31842e+07	7.62887e+07	4.39506e+07	1.29903e+08	4.2746e+07	7.17652e+07	3.51063e+07	6.03528e+07	6.24004e+07					0.680071	1.14175	0.558526	0.960188	0.992764
NV2t005187001.1		2	6.74481	4.79868e+07	4.11647e+07	3.73789e+07	1.38733e+08	1.76239e+08	9.06828e+07	2.27898e+08	2.08997e+08	4.47331e+08					1.11984	0.576207	1.44808	1.32799	2.84238
NV2t005188001.1	Nematogalectin-2
NV2t005196001.1		7	7.30716	1.36254e+08	1.85018e+08	1.32075e+08	1.03986e+08	1.4017e+08	1.11157e+08	6.29101e+08	3.43479e+08	6.06772e+08					0.528276	0.418933	2.37097	1.29451	2.28682
NV2t005196003.1	Nematogalectin-3	7	7.30716	1.36254e+08	1.85018e+08	1.32075e+08	1.03986e+08	1.4017e+08	1.11157e+08	6.29101e+08	3.43479e+08	6.06772e+08					0.528276	0.418933	2.37097	1.29451	2.28682
NV2t005200001.1	Nematogalectin-1	4	7.16921	6.8339e+07	5.11065e+07	3.54648e+07	4.89666e+07	1.01079e+08	6.92146e+07	1.18764e+08	7.68849e+07	1.61807e+08					1.24341	0.851433	1.46096	0.945787	1.99044
NV2t005203001.1		7	6.95124	1.23791e+08	9.66706e+07	1.18012e+08	1.59749e+08	2.73389e+08	1.51447e+08	8.30978e+07	6.21392e+07	9.18899e+07					2.12078	1.17483	0.644621	0.482038	0.712825
NV2t005204001.1		2	6.07967	1.30153e+07	1.29242e+07	1.59964e+07	1.64233e+07	1.91041e+07	1.74324e+07	1.77721e+07	1.53762e+07	1.36148e+07					1.21374	1.10753	1.12911	0.976897	0.864988
NV2t005205001.1		5	6.21674	2.25377e+07	1.82408e+07	2.14654e+07	5.71968e+07	7.90038e+07	4.6361e+07	2.52652e+07	2.25859e+07	3.27077e+07					2.18535	1.28241	0.698867	0.624756	0.904738
NV2t005210001.1		3	6.45665	2.24229e+07	2.168e+07	2.08212e+07	2.7186e+07	2.8366e+07	3.20739e+07	2.08519e+07	2.06561e+07	1.90223e+07					1.19811	1.35473	0.880733	0.872466	0.803456
NV2t005211001.1		3	6.00408	1.23651e+07	1.58654e+07	1.38549e+07	4.42062e+07	3.0526e+07	3.67777e+07	1.87538e+07	2.11533e+07	2.01058e+07					1.28616	1.54956	0.790158	0.891255	0.847121
NV2t005212001.1		7	6.35076	8.32718e+07	8.07396e+07	8.34726e+07	9.34094e+07	1.07006e+08	1.21751e+08	6.87698e+07	6.18755e+07	5.2603e+07					1.27913	1.45538	0.822062	0.739648	0.628806
NV2t005217001.1		7	6.31702	4.78734e+07	6.69564e+07	4.04618e+07	4.97896e+07	3.27351e+07	5.08906e+07	5.28179e+07	5.74031e+07	6.11042e+07					0.640424	0.995616	1.03332	1.12303	1.19543
NV2t005219001.1		14	6.3366	1.09856e+08	1.13072e+08	7.67589e+07	9.27796e+07	9.23896e+07	1.04571e+08	9.745e+07	9.50175e+07	1.23667e+08					0.918222	1.03929	0.968514	0.944339	1.22908
NV2t005224001.1	Cubilin-like-5	2	5.8473	1.87867e+07	1.68459e+07	1.74474e+07	4.08703e+07	3.58145e+07	3.86024e+07	7.18129e+07	9.1334e+07	8.18189e+07					0.779833	0.840536	1.56367	1.98873	1.78154
NV2t005231001.1		3	6.0197	2.16756e+07	1.99488e+07	1.42574e+07	2.5904e+07	1.87542e+07	4.38926e+07	2.36039e+07	3.54024e+07	2.11656e+07					0.751489	1.7588	0.945818	1.41859	0.848113
NV2t005235001.1		8	6.72155	7.36547e+07	8.3451e+07	1.03806e+08	9.62044e+07	9.14164e+07	7.63614e+07	2.02156e+08	1.87652e+08	1.80603e+08					0.751159	0.627453	1.66109	1.54191	1.48399
NV2t005242001.1		2	5.66418	7.91205e+06	9.17472e+06	7.23117e+06	2.46024e+07	2.04567e+07	1.98781e+07	1.29264e+07	1.3398e+07	1.74944e+07					1.38352	1.34439	0.87423	0.906128	1.18317
NV2t005258001.1		13	8.22386	5.9563e+08	6.43581e+08	6.71033e+08	3.07233e+08	2.43926e+08	2.81649e+08	3.26439e+08	3.80286e+08	3.15888e+08					0.582987	0.673146	0.780195	0.908891	0.754978
NV2t005264001.1		14	6.60923	9.42206e+07	1.08623e+08	1.36095e+08	1.48746e+08	1.24595e+08	1.13475e+08	1.38046e+08	1.42862e+08	1.25202e+08					0.990716	0.902294	1.09767	1.13597	0.995542
NV2t005270001.1		8	6.51188	5.66719e+07	4.933e+07	5.59951e+07	8.56028e+07	1.12157e+08	7.72967e+07	5.11599e+07	4.48305e+07	5.73077e+07					1.70985	1.1784	0.77994	0.683449	0.873665
NV2t005271001.1		9	8.38698	6.16437e+08	5.35188e+08	6.51487e+08	1.02527e+08	1.23427e+08	1.37397e+08	1.92153e+08	1.83732e+08	1.3559e+08					0.414812	0.461764	0.645785	0.617485	0.455691
NV2t005273001.1		3	5.98643	1.30587e+07	1.43028e+07	1.07091e+07	1.84891e+07	1.35758e+07	1.72144e+07	1.17308e+07	1.45774e+07	1.53545e+07					0.947056	1.20089	0.818348	1.01693	1.07114
NV2t005278001.1		13	7.76769	8.531e+08	7.19819e+08	9.02861e+08	7.61062e+08	7.54495e+08	6.52971e+08	5.53861e+08	6.61709e+08	6.09601e+08					1.04961	0.908379	0.770502	0.920535	0.848045
NV2t005280001.1		5	5.97447	2.90797e+07	3.18556e+07	3.39841e+07	2.62072e+07	2.67519e+07	3.12949e+07	3.65501e+07	3.26652e+07	2.61752e+07					0.876907	1.02582	1.19808	1.07074	0.858004
NV2t005286001.1		4	6.38054	7.37155e+07	6.31053e+07	8.45102e+07	5.41216e+07	5.65592e+07	3.90308e+07	7.90499e+07	8.83054e+07	9.55551e+07					0.802951	0.554106	1.12224	1.25364	1.35656
NV2t005293002.1		2	6.4726	1.43119e+07	1.60955e+07	1.65938e+07	3.23534e+07	2.90063e+07	3.03723e+07	2.52986e+07	2.50751e+07	2.3229e+07					1.22945	1.28735	1.0723	1.06283	0.984577
NV2t005299001.1		2	5.83283	1.83322e+06	2.31933e+06	2.22718e+06	4.04737e+06	2.76235e+06	3.11126e+06	4.51204e+06	5.22211e+06	4.82844e+06					0.805524	0.907269	1.31575	1.52281	1.40801
NV2t005306002.1		7	7.06463	9.0031e+07	9.99747e+07	7.53964e+07	3.05907e+08	4.31187e+08	2.86348e+08	2.31644e+08	1.47902e+08	2.95324e+08					1.9762	1.31238	1.06166	0.677856	1.35351
NV2t005310001.1		7	6.71798	1.13872e+08	9.68343e+07	1.00817e+08	8.43155e+07	1.13191e+08	1.04547e+08	9.2726e+07	8.1173e+07	8.44149e+07					1.1684	1.07918	0.957154	0.8379	0.871364
NV2t005321001.1		2	6.24738	1.06181e+07	8.1167e+06	6.45648e+06	1.16595e+07	1.35706e+07	1.44176e+07	2.06425e+07	2.31867e+07	2.74373e+07					0.897358	0.953367	1.36499	1.53322	1.8143
NV2t005323001.1		10	7.08762	1.04903e+08	2.35921e+08	2.0919e+08	2.67246e+08	1.24194e+08	1.63598e+08	3.29207e+08	3.14793e+08	2.69517e+08					0.553733	0.729421	1.4678	1.40354	1.20167
NV2t005326002.1		6	6.97081	1.63423e+08	1.21194e+08	1.22377e+08	1.22197e+08	1.88638e+08	1.56645e+08	1.354e+08	1.18197e+08	1.40966e+08					1.33782	1.11092	0.960254	0.838256	0.999732
NV2t005335001.1		8	6.75515	8.62543e+07	7.92821e+07	8.69144e+07	6.14139e+07	6.22562e+07	6.11349e+07	5.51779e+07	5.91808e+07	5.49757e+07					0.923697	0.907061	0.818677	0.878067	0.815676
NV2t005337001.1		4	6.2617	3.90692e+07	3.35081e+07	3.61986e+07	5.40069e+07	5.70093e+07	4.91497e+07	5.08665e+07	5.61495e+07	6.02896e+07					1.17613	1.01398	1.0494	1.15839	1.2438
NV2t005340001.1		8	6.72134	6.04038e+07	5.1196e+07	5.87082e+07	7.24916e+07	7.7224e+07	6.79578e+07	6.80948e+07	7.53707e+07	7.46907e+07					1.14663	1.00904	1.01108	1.11911	1.10902
NV2t005353001.1		7	7.15441	1.27873e+08	1.05277e+08	1.18284e+08	9.31039e+07	1.32864e+08	1.00893e+08	1.34596e+08	1.14489e+08	1.34193e+08					1.12642	0.855371	1.1411	0.970633	1.13769
NV2t005355001.1		2	6.58526	1.94363e+07	2.8954e+07	3.24146e+07	4.01152e+07	4.12541e+07	3.38195e+07	3.06328e+07	1.9983e+07	2.17741e+07					1.38342	1.13411	1.02724	0.67011	0.730176
NV2t005359001.1		4	6.8113	9.78338e+07	9.82026e+07	1.00769e+08	2.4787e+07	2.36778e+07	2.42556e+07	3.33767e+07	3.4787e+07	3.30945e+07					0.45265	0.463696	0.638063	0.665026	0.632669
NV2t005362001.1		7	6.96239	6.27805e+07	7.03835e+07	7.22609e+07	9.31262e+07	9.4661e+07	1.01782e+08	2.34435e+08	2.05591e+08	1.86244e+08					0.759811	0.816973	1.88173	1.6502	1.49491
NV2t005369001.1		4	6.62571	4.05522e+07	4.93034e+07	3.67968e+07	5.13405e+07	5.15299e+07	5.67474e+07	2.95617e+07	2.42099e+07	2.94569e+07					1.25513	1.38222	0.720043	0.589689	0.71749
NV2t005372002.1		3	5.6656	9.57227e+06	1.19755e+07	1.27717e+07	2.3926e+07	2.54573e+07	1.39801e+07	1.25524e+07	9.42391e+06	1.60913e+07					1.68777	0.926855	0.832201	0.624787	1.06682
NV2t005376001.1		15	7.74268	5.81563e+08	7.49902e+08	6.20309e+08	2.95279e+08	2.28448e+08	2.74671e+08	3.17674e+08	3.18233e+08	3.19985e+08					0.554776	0.667025	0.771455	0.772813	0.777069
NV2t005378001.1		4	6.0754	2.59483e+07	2.86112e+07	2.58381e+07	2.35053e+07	1.99799e+07	3.41613e+07	1.61601e+07	1.72312e+07	1.11599e+07					0.887577	1.51757	0.717888	0.765471	0.495764
NV2t005381001.1		15	7.15386	3.00425e+08	3.29177e+08	3.05247e+08	1.51213e+08	1.78863e+08	1.79477e+08	2.752e+08	2.12202e+08	2.28062e+08					0.745311	0.747868	1.14674	0.884229	0.950318
NV2t005383001.1		5	6.20091	2.17827e+07	2.05741e+07	1.99148e+07	1.94184e+07	2.18231e+07	2.71655e+07	2.31793e+07	2.18229e+07	1.81122e+07					1.01349	1.2616	1.07648	1.01348	0.841152
NV2t005386001.1		2	6.19829	1.09199e+07	8.88957e+06	9.97386e+06	3.42585e+07	4.61716e+07	3.7482e+07	3.3423e+07	3.04441e+07	3.34261e+07					1.69618	1.37695	1.22784	1.11841	1.22796
NV2t005387001.1		13	6.94719	1.97674e+08	1.85883e+08	2.1846e+08	2.65599e+08	2.66524e+08	1.96399e+08	3.23187e+08	3.42279e+08	3.95238e+08					1.00313	0.739192	1.21639	1.28825	1.48757
NV2t005390001.1		10	6.62251	1.07669e+08	9.02448e+07	1.0001e+08	2.69648e+08	3.03608e+08	2.57097e+08	1.7481e+08	1.85117e+08	1.97267e+08					1.62119	1.37283	0.933444	0.988479	1.05336
NV2t005396001.1		13	7.11432	2.56059e+08	2.8019e+08	3.12563e+08	9.06872e+07	1.02663e+08	9.59358e+07	9.21271e+07	7.43247e+07	7.13007e+07					0.671559	0.627556	0.602642	0.486188	0.466407
NV2t005397001.1		19	7.40913	3.28737e+08	3.82469e+08	3.22086e+08	2.51998e+08	2.09096e+08	2.72872e+08	2.6848e+08	2.77934e+08	2.52909e+08					0.733217	0.956856	0.941455	0.974605	0.886854
NV2t005399001.1		5	6.56212	9.74749e+07	8.86016e+07	8.78502e+07	4.34321e+07	4.72056e+07	4.42603e+07	6.08619e+07	6.15658e+07	6.62264e+07					0.711072	0.666706	0.916781	0.927384	0.997588
NV2t005406001.1		3	6.38602	1.27601e+07	1.38605e+07	1.22946e+07	1.08426e+07	8.2501e+06	8.80796e+06	7.57227e+06	9.15591e+06	9.66859e+06					0.796576	0.850439	0.731129	0.884035	0.933536
NV2t005409001.1		8	6.96516	1.05715e+08	1.50147e+08	1.2466e+08	1.15989e+08	7.17156e+07	1.07524e+08	7.26207e+07	8.26436e+07	6.63927e+07					0.719227	1.07835	0.728304	0.828823	0.665845
NV2t005424001.1		18	7.18359	2.27441e+08	3.05641e+08	2.40922e+08	4.43842e+08	2.93344e+08	3.55196e+08	3.26929e+08	3.67865e+08	3.85431e+08					0.895977	1.08489	0.998559	1.12359	1.17724
NV2t005425001.1		6	6.12916	3.46898e+07	3.13579e+07	2.34402e+07	2.27505e+07	2.32884e+07	3.22628e+07	3.39683e+07	3.66862e+07	3.54275e+07					0.765307	1.06022	1.11627	1.20559	1.16422
NV2t005426001.1		6	6.9477	1.98504e+08	1.79093e+08	2.22464e+08	7.83574e+07	9.0037e+07	7.65646e+07	8.78666e+07	8.4703e+07	8.01906e+07					0.738156	0.627705	0.720363	0.694427	0.657432
NV2t005429001.1		6	6.54528	3.51277e+07	4.32231e+07	2.52102e+07	5.63032e+07	3.68517e+07	9.29373e+07	3.99471e+07	4.95703e+07	3.37008e+07					0.803313	2.0259	0.870789	1.08056	0.734629
NV2t005434001.1		4	6.65181	5.43832e+07	5.01468e+07	5.20551e+07	3.99679e+07	4.25251e+07	4.30443e+07	1.16558e+08	1.18729e+08	1.13e+08					0.607107	0.61452	1.66404	1.69502	1.61324
NV2t005443001.1		4	6.27879	7.59642e+07	7.62654e+07	6.13985e+07	5.75506e+07	6.8947e+07	7.80563e+07	5.89844e+07	4.90093e+07	5.37736e+07					1.06996	1.21132	0.915356	0.760556	0.834491
NV2t005444001.1		2	6.05913	2.01445e+07	2.1405e+07	2.21497e+07	2.55489e+07	2.88199e+07	2.31605e+07	3.08038e+07	2.56833e+07	3.08855e+07					1.13464	0.911827	1.21274	1.01115	1.21596
NV2t005445001.1		6	7.26872	1.4282e+08	1.31044e+08	2.00907e+08	1.15835e+08	1.0915e+08	1.15093e+08	1.04881e+08	1.21229e+08	7.49923e+07					0.880282	0.928213	0.845848	0.977699	0.604802
NV2t005446001.1		6	6.5377	6.62454e+07	5.33957e+07	4.96565e+07	7.12875e+07	7.23628e+07	5.15999e+07	2.35218e+07	2.87305e+07	4.33265e+07					1.41541	1.00929	0.460082	0.561964	0.847459
NV2t005447001.1		2	6.85627	2.82663e+07	2.29074e+07	1.43948e+07	3.05818e+07	3.69816e+07	5.06299e+07	1.91921e+07	1.95712e+07	2.275e+07					1.35698	1.85779	0.704224	0.718136	0.834776
NV2t005452001.1		3	5.86	1.88961e+07	1.62863e+07	1.48968e+07	3.41353e+07	3.50361e+07	4.3837e+07	3.198e+07	3.61279e+07	3.15689e+07					1.20003	1.50147	1.09536	1.23742	1.08127
NV2t005453001.1		8	6.53261	8.16643e+07	7.96421e+07	6.82666e+07	6.52202e+07	7.13976e+07	6.82474e+07	5.51133e+07	5.15906e+07	6.29673e+07					1.06368	1.01675	0.821076	0.768594	0.938085
NV2t005455001.1		2	6.62018	5.39777e+07	5.08877e+07	7.14866e+07	1.05506e+07	8.13712e+06	1.01232e+07	1.99813e+07	2.74637e+07	1.57149e+07					0.272933	0.339551	0.670206	0.921178	0.527103
NV2t005456001.1		4	6.82715	7.90963e+07	8.96477e+07	8.70026e+07	1.23554e+08	6.90752e+07	7.60684e+07	1.23305e+08	1.94472e+08	1.81968e+08					0.606994	0.668447	1.08354	1.70891	1.59903
NV2t005461001.1		8	6.55865	5.8102e+07	5.14931e+07	7.21349e+07	9.66961e+07	1.0805e+08	7.11277e+07	7.44228e+07	7.51032e+07	8.14443e+07					1.41226	0.929674	0.972743	0.981636	1.06452
NV2t005462001.1		8	5.99272	5.81637e+07	5.37785e+07	4.98866e+07	8.35164e+07	9.04832e+07	9.45027e+07	7.1164e+07	7.09959e+07	7.32816e+07					1.26105	1.31706	0.991798	0.989455	1.02131
NV2t005467001.1		3	6.06411	2.1852e+07	2.04448e+07	2.73798e+07	4.59809e+07	5.22118e+07	3.50566e+07	6.07759e+07	5.71707e+07	6.35827e+07					1.22227	0.820666	1.42275	1.33835	1.48845
NV2t005468005.1		10	7.46969	2.14716e+08	2.0338e+08	2.41901e+08	1.26142e+08	1.49089e+08	1.20331e+08	1.51003e+08	1.34797e+08	1.40422e+08					0.905532	0.73086	0.917161	0.818728	0.852892
NV2t005478002.1		4	6.30061	4.0538e+07	3.2774e+07	2.74074e+07	1.18406e+07	1.4734e+07	1.81594e+07	1.37184e+07	1.36275e+07	1.32224e+07					0.712852	0.878579	0.663718	0.659319	0.639717
NV2t005479001.1		10	6.33186	5.18735e+07	5.52895e+07	4.13236e+07	3.08577e+07	2.37894e+07	3.57705e+07	3.58401e+07	4.35891e+07	3.87877e+07					0.59953	0.901472	0.903225	1.09851	0.97751
NV2t005482001.1		4	7.08231	3.60833e+07	3.83773e+07	4.79592e+07	5.69897e+07	5.07995e+07	4.75905e+07	4.88635e+07	5.15086e+07	4.39981e+07					1.08297	1.01456	1.04169	1.09808	0.937971
NV2t005485001.1		14	7.3695	2.3277e+08	2.17581e+08	2.24284e+08	1.44788e+08	1.47107e+08	1.64932e+08	1.16107e+08	1.22177e+08	1.0572e+08					0.89732	1.00605	0.708228	0.745252	0.644865
NV2t005493001.1		4	6.2558	3.58395e+07	3.58251e+07	4.70037e+07	5.44688e+07	7.67758e+07	5.31353e+07	7.72293e+07	5.47779e+07	6.03276e+07					1.39484	0.965349	1.40308	0.995193	1.09602
NV2t005501001.1		4	5.88538	2.0701e+07	1.96568e+07	2.03825e+07	1.78386e+07	1.99823e+07	2.03633e+07	2.19641e+07	2.06365e+07	1.95299e+07					0.993292	1.01223	1.09181	1.02581	0.970804
NV2t005504001.1		4	6.54645	7.55275e+07	5.12297e+07	7.60492e+07	6.79449e+07	8.88672e+07	5.64959e+07	1.01895e+08	1.14783e+08	1.21631e+08					1.06016	0.673976	1.21557	1.36932	1.45101
NV2t005506001.1		12	6.54605	4.20098e+07	3.77945e+07	5.15442e+07	1.29123e+08	1.16971e+08	1.11795e+08	7.50512e+08	9.20307e+08	7.06077e+08					0.367302	0.351048	2.3567	2.88987	2.21717
NV2t005507001.1		5	6.35518	1.95448e+07	1.69676e+07	2.41684e+07	5.097e+07	5.45577e+07	4.72953e+07	1.63331e+08	1.75656e+08	1.42262e+08					0.706754	0.612674	2.11583	2.27549	1.8429
NV2t005508001.1		7	6.45629	2.73109e+07	2.633e+07	3.89145e+07	7.32184e+07	7.46787e+07	6.40516e+07	5.14494e+08	5.22896e+08	4.1251e+08					0.383098	0.328582	2.63933	2.68243	2.11615
NV2t005509001.1		8	6.39528	2.36222e+07	2.47845e+07	2.81817e+07	4.76174e+07	3.88851e+07	4.88366e+07	2.57426e+08	3.00263e+08	2.10265e+08					0.357152	0.448554	2.36441	2.75785	1.93123
NV2t005519003.1		3	7.00539	5.2694e+07	5.73017e+07	6.29567e+07	4.43181e+07	5.68513e+07	4.23289e+07	4.8258e+07	3.45724e+07	4.22641e+07					1.1588	0.862789	0.983641	0.704688	0.861467
NV2t005524012.1		23	7.09645	3.3567e+08	2.95037e+08	3.41254e+08	3.1859e+08	3.7252e+08	3.32926e+08	4.22481e+08	4.10819e+08	3.97435e+08					1.03903	0.928597	1.17838	1.14586	1.10852
NV2t005524014.1	Scribble homolog	23	7.09645	3.3567e+08	2.95037e+08	3.41254e+08	3.1859e+08	3.7252e+08	3.32926e+08	4.22481e+08	4.10819e+08	3.97435e+08					1.03903	0.928597	1.17838	1.14586	1.10852
NV2t005527001.1		3	5.87309	2.30584e+07	1.90672e+07	2.03376e+07	1.83151e+07	2.54555e+07	2.21614e+07	2.45709e+07	2.13657e+07	2.30092e+07					1.16093	1.0107	1.12059	0.974411	1.04937
NV2t005536001.1	EGF-like repeat protein-19,partial
NV2t005541001.1		8	7.69329	2.01341e+08	1.89592e+08	1.97605e+08	2.82302e+08	5.09004e+08	2.64344e+08	2.82726e+08	1.66417e+08	3.07456e+08					1.90814	0.990966	1.05988	0.623858	1.15258
NV2t005543001.1		15	6.62524	1.28066e+08	1.07125e+08	1.00545e+08	1.21862e+08	1.30052e+08	1.18874e+08	1.12702e+08	1.26168e+08	1.4707e+08					1.0714	0.979315	0.928468	1.03941	1.2116
NV2t005552001.1		2	6.18532	1.26687e+07	1.13826e+07	9.8717e+06	1.11185e+07	9.5478e+06	1.19589e+07	1.00116e+07	1.29677e+07	1.19382e+07					0.846889	1.06075	0.888031	1.15023	1.05892
NV2t005576001.1	PAN/Apple and EGF domain-containing lectin protein-1
NV2t005593001.1		3	6.16345	4.01284e+07	2.8682e+07	3.45566e+07	9.43546e+07	1.32633e+08	8.67874e+07	1.1448e+08	1.1387e+08	1.44443e+08					1.51114	0.988799	1.30431	1.29736	1.64569
NV2t005595001.1		2	6.14137	1.29599e+07	1.21183e+07	1.08189e+07	2.06136e+07	1.96905e+07	2.12168e+07	1.78794e+07	2.00048e+07	2.07962e+07					1.13528	1.22327	1.03085	1.1534	1.19902
NV2t005627001.1	CTLD protein-4
NV2t005628001.1		2	5.76306	7.67083e+06	9.41043e+06	7.75759e+06	1.5173e+07	1.00272e+07	1.23659e+07	1.09487e+07	1.34963e+07	1.32759e+07					0.901314	1.11153	0.984148	1.21314	1.19333
NV2t005653001.1		5	6.25446	4.64284e+07	4.40967e+07	4.77578e+07	3.12828e+07	3.55812e+07	3.13575e+07	3.98239e+07	3.6841e+07	3.85999e+07					0.910344	0.802281	1.01889	0.942576	0.987576
NV2t005661001.1	Wnt8b
NV2t005663001.1		18	7.95835	6.75179e+08	5.9961e+08	6.85929e+08	1.13128e+09	1.18784e+09	8.22378e+08	9.17034e+08	9.82823e+08	1.24098e+09					1.29692	0.897895	1.00124	1.07307	1.35494
NV2t005667001.1		3	6.10951	2.22001e+07	2.36979e+07	1.88848e+07	1.0942e+08	6.47979e+07	7.59585e+07	4.6939e+07	7.4206e+07	7.94388e+07					1.1312	1.32603	0.819429	1.29544	1.38679
NV2t005669001.1		14	7.28046	4.23386e+08	4.15065e+08	3.37367e+08	2.00631e+08	2.04248e+08	2.60072e+08	2.34809e+08	2.35126e+08	2.27192e+08					0.724313	0.922279	0.832692	0.833815	0.805678
NV2t005688002.1	Fibrinogen-related protein-20
NV2t005693001.1		12	6.78356	6.14519e+07	1.01711e+08	9.11325e+07	6.90874e+07	5.95433e+07	7.31697e+07	7.70691e+07	5.39934e+07	4.90398e+07					0.842332	1.0351	1.09026	0.76382	0.693743
NV2t005695001.1		7	6.28786	7.12085e+07	6.93771e+07	5.73879e+07	7.74097e+07	6.99754e+07	1.00836e+08	3.90738e+07	4.43381e+07	3.71976e+07					1.1111	1.60113	0.620433	0.704021	0.590641
NV2t005698001.1	Meprin-like Astacin metalloprotease-10	26	7.56039	6.63349e+08	7.73362e+08	6.25561e+08	5.47896e+08	4.5925e+08	7.35251e+08	2.06872e+09	2.11561e+09	1.63371e+09					0.429531	0.687671	1.93485	1.9787	1.52799
NV2t005700002.1	Anthrax toxin receptor 1-like-1
NV2t005701001.1		3	6.27552	2.63802e+07	2.25448e+07	1.97043e+07	1.6142e+07	1.59938e+07	2.12683e+07	1.80878e+07	2.13476e+07	1.83682e+07					0.800414	1.06438	0.905209	1.06835	0.919241
NV2t005708001.1		54	8.71558	2.53064e+09	2.56033e+09	2.60391e+09	9.7042e+08	9.32013e+08	1.11966e+09	1.14317e+09	1.17574e+09	9.6234e+08					0.599227	0.719874	0.734991	0.755927	0.618726
NV2t005709001.1		2	6.30348	3.55034e+07	3.91375e+07	3.68467e+07	1.06965e+07	1.08118e+07	1.42438e+07	1.05073e+07	9.42398e+06	7.59826e+06					0.55677	0.733506	0.541088	0.485302	0.391284
NV2t005710001.1		5	6.34872	4.37713e+07	4.364e+07	4.74778e+07	9.61955e+07	1.45952e+08	1.03916e+08	6.67495e+07	4.40986e+07	5.69321e+07					2.02482	1.44165	0.926029	0.611788	0.789831
NV2t005710005.1		3	6.72412	1.0971e+08	9.64003e+07	1.01439e+08	1.36601e+08	1.9639e+08	1.39323e+08	8.89978e+07	7.0405e+07	9.43161e+07					1.71009	1.21317	0.774955	0.613057	0.821265
NV2t005727001.1	Cadherin and SEA domain-containing EGF-like repeat protein
NV2t005728003.1	Hemolin-like-2	10	7.37868	2.37374e+08	2.19948e+08	2.09148e+08	8.21265e+07	8.35861e+07	9.65035e+07	1.23693e+08	1.31079e+08	1.19399e+08					0.577404	0.666637	0.854457	0.905479	0.824799
NV2t005729001.1		3	6.24861	4.29172e+07	3.70968e+07	3.72617e+07	3.75831e+07	3.83793e+07	3.235e+07	5.0078e+07	5.66975e+07	6.69688e+07					0.864977	0.729093	1.12864	1.27783	1.50932
NV2t005732001.1		9	6.70633	7.11437e+07	7.11308e+07	6.31968e+07	6.35635e+07	6.84468e+07	6.52712e+07	4.85871e+07	4.51004e+07	5.32338e+07					1.1207	1.06871	0.795533	0.738444	0.871615
NV2t005739001.1		2	6.69995	3.15357e+07	2.74832e+07	3.06712e+07	9.22173e+07	1.04205e+08	9.13114e+07	1.23694e+08	1.25525e+08	1.28365e+08					1.24217	1.08847	1.47448	1.49631	1.53016
NV2t005740002.1		4	6.99238	5.11939e+07	3.80788e+07	4.94763e+07	4.03368e+07	5.02483e+07	3.89859e+07	3.66046e+07	3.94799e+07	3.91642e+07					1.17902	0.914759	0.858886	0.926351	0.918944
NV2t005750001.1		5	6.73834	9.00097e+07	7.9519e+07	9.60027e+07	1.17095e+08	1.58853e+08	1.077e+08	6.91295e+07	5.76435e+07	7.04255e+07					1.68917	1.14524	0.735091	0.612954	0.748872
NV2t005752001.1		12	6.77891	1.15612e+08	1.13616e+08	9.99628e+07	7.37861e+07	8.06082e+07	9.67806e+07	1.54478e+08	1.43797e+08	1.36131e+08					0.714913	0.858346	1.37006	1.27534	1.20734
NV2t005766001.1		2	6.29018	4.00757e+07	2.66832e+07	2.99327e+07	1.96988e+07	2.80822e+07	2.59438e+07	2.38613e+07	2.5123e+07	2.42423e+07					1.03733	0.958344	0.881418	0.928026	0.895494
NV2t005770001.1		6	6.57823	9.49955e+07	7.28583e+07	7.96474e+07	1.46036e+08	1.58861e+08	1.31201e+08	1.23263e+08	1.47646e+08	1.63539e+08					1.27879	1.05614	0.992233	1.18851	1.31645
NV2t005797001.1		4	6.55672	3.96552e+07	3.26147e+07	3.84705e+07	1.19813e+08	1.23738e+08	9.91375e+07	9.55246e+07	1.12389e+08	1.1893e+08					1.42725	1.1435	1.10182	1.29635	1.37179
NV2t005798001.1		11	6.61778	9.0255e+07	8.91419e+07	9.40355e+07	6.69886e+07	5.65101e+07	6.63795e+07	1.65622e+08	1.98658e+08	1.60325e+08					0.514812	0.604724	1.50883	1.80979	1.46058
NV2t005801001.1		2	5.966	1.59974e+07	1.7805e+07	1.80617e+07	3.00062e+07	2.5556e+07	2.20973e+07	2.97131e+07	3.13254e+07	3.57149e+07					1.01647	0.878902	1.18182	1.24594	1.42054
NV2t005803001.1		6	7.42846	1.45469e+08	1.58119e+08	1.67909e+08	5.1491e+07	5.33797e+07	5.63649e+07	4.41597e+07	3.91647e+07	3.49289e+07					0.639715	0.67549	0.529221	0.469359	0.418597
NV2t005804001.1		17	7.48458	5.51152e+08	3.89425e+08	6.60712e+08	2.75769e+08	4.71875e+08	3.20836e+08	2.20704e+08	1.82432e+08	1.5815e+08					1.31439	0.893678	0.614765	0.508159	0.440523
NV2t005809002.1		6	7.54025	1.67069e+08	1.7797e+08	1.71651e+08	1.43163e+08	1.98168e+08	1.52715e+08	1.59685e+08	1.08227e+08	1.45614e+08					1.25224	0.965015	1.00906	0.683894	0.920144
NV2t005809003.1		4	7.45277	2.29753e+08	2.1561e+08	2.24947e+08	1.56001e+08	2.70387e+08	2.10419e+08	1.4565e+08	8.94893e+07	1.10223e+08					1.47262	1.14602	0.793264	0.487391	0.600316
NV2t005819001.1		15	7.20894	2.47275e+08	2.00937e+08	1.98569e+08	2.06784e+08	2.55699e+08	2.78661e+08	2.49043e+08	2.4769e+08	2.29998e+08					1.08826	1.18599	1.05993	1.05417	0.978874
NV2t005822001.1	TGF-beta receptor type III-like	9	7.11199	1.34686e+08	1.94405e+08	1.69588e+08	1.42488e+08	7.83268e+07	9.28063e+07	4.33332e+08	5.45795e+08	5.28065e+08					0.303921	0.360103	1.6814	2.11777	2.04898
NV2t005824001.1	Zona pellucida sperm-binding protein-like-1	13	8.79045	1.172e+09	1.61191e+09	1.61387e+09	5.8444e+08	4.01801e+08	4.59107e+08	1.29247e+09	1.36603e+09	1.19411e+09					0.37297	0.426164	1.19972	1.26801	1.10842
NV2t005831001.1		2	5.69152	4.33311e+06	5.52425e+06	5.03107e+06	4.69557e+06	4.44814e+06	4.56442e+06	1.12589e+07	9.31662e+06	9.9696e+06					0.676904	0.694599	1.71335	1.41777	1.51714
NV2t005837001.1		8	6.59873	9.76632e+07	9.18025e+07	9.73533e+07	1.06266e+08	1.2705e+08	1.0526e+08	1.046e+08	9.30148e+07	1.05872e+08					1.231	1.01987	1.01347	0.901227	1.0258
NV2t005841001.1		16	7.38978	2.36991e+08	1.99896e+08	2.07711e+08	1.83181e+08	1.92117e+08	1.84662e+08	2.67507e+08	3.02206e+08	3.02587e+08					0.832533	0.800226	1.15923	1.3096	1.31125
NV2t005845001.1		4	6.51486	5.83619e+07	8.44643e+07	8.57698e+07	1.99399e+07	1.60857e+07	2.57277e+07	2.35662e+07	2.01722e+07	1.24206e+07					0.4178	0.668237	0.612094	0.523942	0.322606
NV2t005847001.1		11	7.17623	2.20344e+08	1.72806e+08	2.01109e+08	1.18903e+08	1.49032e+08	1.37057e+08	1.3111e+08	1.33296e+08	1.24547e+08					0.966205	0.888569	0.850011	0.864182	0.807464
NV2t005851001.1	CTLD protein-5
NV2t005856001.1		17	6.8043	3.42138e+08	2.97001e+08	2.47742e+08	1.43275e+08	1.60005e+08	1.4531e+08	3.26676e+08	3.36761e+08	4.44563e+08					0.589346	0.535217	1.20324	1.24039	1.63745
NV2t005862001.1		2	6.2872	1.89733e+07	2.10659e+07	2.42059e+07	1.65229e+07	1.27199e+07	1.83483e+07	1.4312e+07	1.67337e+07	1.0096e+07					0.748335	1.07947	0.842005	0.984479	0.593968
NV2t005864001.1		4	6.2274	2.88891e+07	3.32357e+07	3.12807e+07	8.97791e+07	6.22685e+07	7.40959e+07	8.37073e+07	1.0484e+08	9.36141e+07					0.931372	1.10828	1.25204	1.56813	1.40022
NV2t005865001.1		2	5.88632	1.26903e+07	1.24031e+07	1.19229e+07	2.23688e+07	2.02882e+07	2.59609e+07	1.97623e+07	2.22793e+07	1.8113e+07					1.10136	1.40931	1.07282	1.20945	0.983279
NV2t005867001.1		5	6.61789	6.87899e+07	7.15308e+07	8.45856e+07	6.92592e+07	6.49215e+07	5.72625e+07	1.36024e+08	1.39464e+08	1.33718e+08					0.707758	0.624262	1.4829	1.5204	1.45776
NV2t005870001.1		6	6.24372	5.36193e+07	4.76107e+07	4.71321e+07	6.66786e+07	8.15167e+07	6.74216e+07	6.0081e+07	5.53121e+07	6.75566e+07					1.3414	1.10946	0.988664	0.910189	1.11168
NV2t005873001.1	Microfibril-associated glycoprotein 4-like-5
NV2t005875001.1		3	6.07153	3.30077e+07	3.53809e+07	4.27238e+07	1.88854e+08	1.75966e+08	1.19581e+08	6.85834e+07	6.86259e+07	8.36313e+07					1.93996	1.31833	0.756107	0.756576	0.922004
NV2t005879001.1		24	7.1028	5.18051e+08	3.18068e+08	4.23462e+08	1.55046e+08	1.80024e+08	1.74503e+08	3.69813e+08	5.18429e+08	4.01731e+08					0.529635	0.513391	1.08799	1.52523	1.1819
NV2t005887003.1		20	8.38482	2.11595e+09	1.49625e+09	1.68471e+09	4.34686e+09	5.67305e+09	4.91479e+09	1.41252e+09	1.5296e+09	1.56813e+09					2.0636	1.78778	0.513812	0.556403	0.570418
NV2t005899011.1		20	7.53751	5.98101e+08	4.0967e+08	4.20426e+08	5.06873e+08	6.64973e+08	6.02567e+08	3.91007e+08	4.34857e+08	4.6763e+08					1.3311	1.20618	0.782691	0.870467	0.936069
NV2t005900001.1		6	6.87016	1.17512e+08	1.1251e+08	8.48357e+07	6.07773e+07	5.66005e+07	6.51444e+07	5.73655e+07	6.42965e+07	7.40897e+07					0.734932	0.84587	0.744865	0.83486	0.96202
NV2t005904001.1		14	7.16598	1.47453e+08	1.31532e+08	1.41114e+08	1.6699e+08	1.76011e+08	1.62826e+08	1.25139e+08	1.33011e+08	1.34022e+08					1.20181	1.11178	0.854451	0.908204	0.915107
NV2t005905001.1		5	6.51126	5.27309e+07	4.53545e+07	6.83653e+07	1.04453e+08	1.34747e+08	6.32885e+07	1.12428e+08	1.01262e+08	1.43034e+08					1.46878	0.689866	1.2255	1.10379	1.55911
NV2t005906001.1		11	6.31487	7.76136e+07	7.43945e+07	5.07552e+07	4.99005e+07	6.16991e+07	6.77406e+07	5.79147e+07	4.88358e+07	6.5199e+07					1.00224	1.10037	0.940763	0.793285	1.05909
NV2t005908001.1		2	5.70657	5.06477e+06	4.68653e+06	5.06396e+06	1.51401e+07	1.45174e+07	1.23443e+07	1.00169e+07	1.12826e+07	1.22802e+07					1.44537	1.22901	0.997297	1.12331	1.22263
NV2t005910001.1	Delta and Notch-like epidermal growth factor-related receptor-1	3	6.47551	3.68842e+07	3.59314e+07	3.02719e+07	4.7281e+07	4.99473e+07	4.52086e+07	6.40248e+07	6.21749e+07	8.15369e+07					0.991759	0.897667	1.27128	1.23455	1.61901
NV2t005916001.1	Fibropellin-like-4
NV2t005917001.1	Fibropellin-like-5	6	6.73557	5.35347e+07	6.8119e+07	4.1142e+07	8.91858e+07	1.02894e+08	8.25195e+07	2.11643e+08	1.4408e+08	2.97462e+08					0.849129	0.680992	1.74658	1.18902	2.4548
NV2t005918001.1		5	6.80891	4.43508e+07	4.49118e+07	3.15779e+07	1.83217e+08	1.71812e+08	1.95942e+08	3.79543e+08	3.9943e+08	4.98147e+08					0.793414	0.904843	1.7527	1.84453	2.3004
NV2t005918002.1	Fibropellin-like-6	5	6.80891	4.43508e+07	4.49118e+07	3.15779e+07	1.83217e+08	1.71812e+08	1.95942e+08	3.79543e+08	3.9943e+08	4.98147e+08					0.793414	0.904843	1.7527	1.84453	2.3004
NV2t005923001.1		7	6.34315	7.17717e+07	7.05169e+07	6.86628e+07	6.74018e+07	6.5654e+07	6.22502e+07	6.12046e+07	6.39116e+07	6.92286e+07					0.983823	0.932817	0.917149	0.957713	1.03739
NV2t005925001.1		17	6.96325	2.14714e+08	2.40127e+08	2.21574e+08	1.0952e+08	1.00053e+08	1.24395e+08	1.14275e+08	1.11779e+08	9.74366e+07					0.675085	0.839325	0.771045	0.754201	0.657432
NV2t005927001.1		10	7.27797	1.92831e+08	1.8911e+08	1.73539e+08	2.04278e+08	1.80015e+08	2.12268e+08	2.44988e+08	2.833e+08	2.61819e+08					0.834198	0.983656	1.13529	1.31283	1.21328
NV2t005928002.1	Nattectin-like
NV2t005932001.1		5	6.19036	2.8164e+07	2.94151e+07	2.66486e+07	4.23319e+07	3.71141e+07	4.32962e+07	6.82542e+07	7.44916e+07	7.04863e+07					0.79492	0.92733	1.46189	1.59548	1.5097
NV2t005939001.1	H-type lectin agglutinin	6	7.38886	9.06849e+07	1.4364e+08	1.1953e+08	1.90511e+08	7.58868e+07	1.39789e+08	1.85567e+08	2.93927e+08	1.91755e+08					0.477179	0.878999	1.16685	1.84822	1.20576
NV2t005942001.1		14	7.92862	6.82017e+08	7.52e+08	9.28045e+08	4.36803e+08	4.60105e+08	3.77356e+08	3.83699e+08	3.30158e+08	3.26204e+08					0.885501	0.726245	0.738452	0.63541	0.627801
NV2t005946002.1		22	7.15258	3.49322e+08	3.62745e+08	3.56947e+08	1.66035e+08	1.57688e+08	1.92831e+08	1.77575e+08	1.79942e+08	1.49543e+08					0.678186	0.829331	0.763716	0.773898	0.643156
NV2t005947001.1		12	7.81159	5.54379e+08	4.26414e+08	5.28655e+08	8.43986e+08	8.02734e+08	6.05936e+08	9.16595e+08	1.25211e+09	1.33801e+09					0.993917	0.750249	1.1349	1.55032	1.65668
NV2t005949001.1	MANSC domain-containing receptor protein-1
NV2t005960001.1	Lactadherin-like-5
NV2t005962001.1	EGF repeat and pentraxin domain-containing protein-1
NV2t005964001.1		3	6.45838	2.40795e+07	2.68172e+07	2.85217e+07	5.47246e+07	4.6525e+07	5.89084e+07	2.84141e+07	2.99908e+07	2.22715e+07					1.30748	1.65549	0.798515	0.842827	0.62589
NV2t005967002.1		3	5.9412	8.15488e+06	1.06091e+07	8.39245e+06	2.13762e+07	1.52821e+07	1.71268e+07	1.11363e+07	1.19662e+07	1.34978e+07					1.17012	1.31138	0.852688	0.916233	1.0335
NV2t005973001.1		2	6.46204	1.32584e+07	1.17878e+07	1.83563e+07	9.50593e+06	9.51132e+06	8.09035e+06	6.83864e+06	7.68263e+06	5.80019e+06					0.942424	0.801628	0.677603	0.761229	0.574708
NV2t005974001.1		17	6.97946	1.74932e+08	1.66158e+08	1.67151e+08	1.59409e+08	1.53392e+08	1.82647e+08	1.50901e+08	1.64997e+08	1.3775e+08					0.947297	1.12796	0.93191	1.01896	0.850697
NV2t005977001.1		3	6.67059	3.73802e+07	3.19269e+07	2.87384e+07	2.63173e+07	4.1287e+07	3.41748e+07	3.9782e+07	2.96706e+07	3.98236e+07					1.20214	0.995058	1.15832	0.863911	1.15953
NV2t005980003.1		26	7.84355	8.31212e+08	8.86649e+08	8.50037e+08	5.11516e+08	4.87959e+08	5.4224e+08	5.92472e+08	5.81875e+08	5.46196e+08					0.753261	0.837054	0.914598	0.898239	0.843162
NV2t005987001.1	Collagen-like-1
NV2t005988001.1		8	6.59083	7.23107e+07	6.51654e+07	6.20168e+07	6.7378e+07	7.43734e+07	7.39478e+07	8.32322e+07	8.36186e+07	8.83724e+07					0.998427	0.992713	1.11735	1.12254	1.18636
NV2t005990001.1		8	7.10204	1.60763e+08	1.55192e+08	2.04882e+08	1.55831e+08	1.31174e+08	1.18902e+08	1.33122e+08	1.63719e+08	1.36815e+08					0.867806	0.786623	0.880694	1.08312	0.905129
NV2t005993001.1		6	6.41597	5.04458e+07	5.16617e+07	5.17782e+07	3.40745e+07	3.54865e+07	4.06033e+07	3.68209e+07	3.45018e+07	3.0087e+07					0.87391	0.999917	0.906769	0.849659	0.740939
NV2t006001001.1		4	6.7672	6.3212e+07	5.8559e+07	6.59913e+07	1.15165e+08	1.29357e+08	9.53355e+07	7.87478e+07	7.56313e+07	9.10662e+07					1.50597	1.10989	0.916779	0.880497	1.06019
NV2t006010001.1	Fibrinogen-related protein-21
NV2t006019001.1	Meprin-like Astacin metalloprotease-9
NV2t006021001.1	Crumbs-like-2	2	6.56399	8.06595e+06	8.03488e+06	8.63631e+06	3.71072e+07	5.37972e+07	3.1515e+07	2.02474e+08	1.4011e+08	2.22524e+08					0.679769	0.398216	2.55841	1.7704	2.81176
NV2t006022001.1	EGF-like repeat domain-5
NV2t006027001.1		16	7.28724	4.46218e+08	4.45122e+08	4.29469e+08	1.49001e+08	1.6926e+08	2.83829e+08	2.61871e+08	2.30949e+08	1.42749e+08					0.59541	0.998433	0.921193	0.812417	0.502154
NV2t006028002.1		2	6.33469	2.59991e+07	2.17278e+07	4.08246e+07	4.94483e+07	6.82724e+07	2.51613e+07	3.7763e+07	3.2707e+07	4.72345e+07					1.75991	0.648602	0.973446	0.843114	1.2176
NV2t006034001.1	EGF-like repeat protein-17,partial
NV2t006039001.1		4	6.48323	5.53271e+07	4.67612e+07	5.03872e+07	4.07734e+07	5.00712e+07	3.69349e+07	5.24082e+07	5.04622e+07	6.34886e+07					1.00902	0.744298	1.05611	1.0169	1.2794
NV2t006047001.1	Protein eyes shut homolog
NV2t006053001.1		5	6.51775	1.12709e+08	1.16833e+08	1.16501e+08	5.97792e+07	6.12991e+07	7.09426e+07	5.51556e+07	5.18568e+07	4.49366e+07					0.799539	0.925321	0.719407	0.676381	0.586119
NV2t006056001.1		6	6.36474	6.44365e+07	5.03043e+07	6.04711e+07	8.06134e+07	1.08109e+08	7.26927e+07	7.57464e+07	7.23034e+07	8.94544e+07					1.44331	0.970484	1.01125	0.965288	1.19426
NV2t006065001.1		25	6.71074	1.5071e+08	1.88639e+08	1.52752e+08	2.03896e+08	1.4651e+08	1.93852e+08	1.87876e+08	2.08761e+08	1.94852e+08					0.810021	1.07176	1.03872	1.15419	1.07729
NV2t006070001.1		3	6.27752	2.45312e+07	1.81031e+07	2.20611e+07	1.42157e+07	1.6725e+07	1.63311e+07	1.64454e+07	1.89294e+07	1.59085e+07					0.92205	0.900331	0.906635	1.04358	0.877036
NV2t006075001.1		2	6.10577	2.71853e+07	1.85409e+07	2.54576e+07	4.37358e+07	5.56546e+07	2.68016e+07	4.71019e+07	5.42383e+07	8.20297e+07					1.31555	0.633531	1.11339	1.28207	1.939
NV2t006077001.1		15	6.75909	1.86869e+08	1.89857e+08	1.66243e+08	2.54728e+08	1.84983e+08	2.35435e+08	1.4283e+08	1.93465e+08	1.73604e+08					0.963446	1.22621	0.743902	1.00762	0.904181
NV2t006079001.1		12	6.28831	9.54181e+07	8.34033e+07	9.81648e+07	1.01726e+08	9.2874e+07	8.8902e+07	1.98479e+08	2.48557e+08	2.20622e+08					0.680592	0.651484	1.45448	1.82145	1.61674
NV2t006087001.1		2	6.19171	8.64516e+06	1.15764e+07	1.01016e+07	1.01683e+07	7.67905e+06	1.17481e+07	1.01454e+07	1.00262e+07	7.51058e+06					0.788937	1.20698	1.04233	1.03008	0.771628
NV2t006088001.1		4	6.53939	4.44022e+07	4.27899e+07	4.60782e+07	4.4641e+07	4.82248e+07	3.6391e+07	4.86814e+07	4.67322e+07	5.7511e+07					1.0447	0.788345	1.05459	1.01237	1.24587
NV2t006091001.1		8	6.91581	9.75216e+07	9.25964e+07	1.13509e+08	1.31876e+08	1.45159e+08	1.12908e+08	1.12669e+08	1.07735e+08	1.12993e+08					1.27212	0.98949	0.98739	0.944158	0.990233
NV2t006093001.1		27	7.61038	6.61639e+08	8.2543e+08	7.8865e+08	4.07214e+08	3.8924e+08	3.93927e+08	5.14822e+08	4.31448e+08	4.46209e+08					0.721026	0.729708	0.953652	0.799211	0.826555
NV2t006094001.1		2	6.92587	4.34683e+07	4.53443e+07	3.89456e+07	4.94354e+07	5.39805e+07	4.51832e+07	5.65188e+07	4.95871e+07	6.89775e+07					1.07617	0.90078	1.12677	0.988577	1.37515
NV2t006095001.1		5	6.38577	4.9698e+07	4.33898e+07	5.17472e+07	3.1369e+07	4.4708e+07	3.9926e+07	6.89524e+07	5.53787e+07	5.19979e+07					0.920407	0.82196	1.41953	1.14009	1.07049
NV2t006098001.1		15	7.81507	5.21245e+08	4.4578e+08	6.41445e+08	7.19087e+08	8.96671e+08	6.45384e+08	4.55674e+08	4.27022e+08	4.12324e+08					1.56256	1.12466	0.794067	0.744137	0.718525
NV2t006101001.1		4	5.93691	2.28712e+07	2.10016e+07	2.02336e+07	3.06648e+07	3.38204e+07	3.57487e+07	7.75443e+07	7.65198e+07	7.51423e+07					0.773437	0.817536	1.77336	1.74993	1.71843
NV2t006108001.1		3	6.02353	1.00529e+07	1.09233e+07	9.3121e+06	1.82282e+07	1.64972e+07	2.07679e+07	1.14136e+07	1.1599e+07	1.08083e+07					1.2414	1.56277	0.858868	0.872813	0.813317
NV2t006127001.1	Scavenger receptor-like
NV2t006137001.1		2	5.82134	2.13285e+07	3.04563e+07	2.23699e+07	1.17053e+07	8.68636e+06	1.77079e+07	1.76269e+07	1.66238e+07	1.11027e+07					0.496024	1.01119	1.00656	0.949282	0.634004
NV2t006139001.1		3	6.15292	2.11359e+07	1.74541e+07	1.8268e+07	1.33827e+07	1.35619e+07	1.55326e+07	1.25554e+07	1.49935e+07	1.25083e+07					0.875635	1.00287	0.81065	0.968069	0.80761
NV2t006140001.1		6	6.67785	1.28688e+08	1.13765e+08	1.22272e+08	7.91479e+07	8.66321e+07	7.716e+07	7.59682e+07	7.84596e+07	8.19651e+07					0.923738	0.822739	0.810031	0.836596	0.873975
NV2t006141001.1		3	6.69723	3.80734e+07	3.88999e+07	2.92023e+07	3.27193e+07	3.14577e+07	3.85701e+07	2.40002e+07	2.4417e+07	2.65285e+07					0.99736	1.22286	0.760923	0.774137	0.841082
NV2t006142001.1		8	7.21397	6.78886e+07	7.35642e+07	8.66151e+07	1.64976e+08	1.47012e+08	1.36592e+08	1.76603e+08	1.82778e+08	1.67085e+08					1.09974	1.02179	1.32109	1.36729	1.24989
NV2t006144001.1		4	6.35569	4.77933e+07	2.98755e+07	3.79813e+07	6.84991e+07	1.03134e+08	6.38578e+07	5.15534e+07	5.47415e+07	6.95449e+07					1.76137	1.09059	0.88045	0.934897	1.18772
NV2t006146001.1		4	6.61699	2.22686e+07	1.84634e+07	1.898e+07	2.0051e+07	2.08252e+07	2.23787e+07	2.29962e+07	2.66878e+07	2.41599e+07					0.952318	1.02336	1.0516	1.22041	1.10481
NV2t006147001.1		10	7.42036	2.29492e+08	2.64043e+08	1.74802e+08	1.63986e+08	1.57507e+08	1.81608e+08	1.42396e+08	1.28773e+08	1.68707e+08					0.879755	1.01437	0.795355	0.719262	0.942312
NV2t006151003.1		3	6.14793	4.49548e+07	3.96636e+07	4.66293e+07	1.64059e+07	1.96269e+07	1.95341e+07	1.25368e+07	1.18699e+07	1.0145e+07					0.797962	0.794189	0.509704	0.482589	0.412461
NV2t006159001.1		6	6.75475	4.16208e+07	4.53235e+07	4.19437e+07	7.58329e+07	6.70169e+07	6.16373e+07	1.05017e+08	1.09055e+08	1.28132e+08					0.892794	0.821127	1.39903	1.45282	1.70696
NV2t006165001.1		2	6.30014	1.52852e+07	1.80775e+07	1.59633e+07	3.4103e+07	2.05171e+07	2.71248e+07	1.5577e+07	2.18786e+07	1.87412e+07					0.986043	1.3036	0.748625	1.05148	0.900692
NV2t006168001.1		6	6.86181	5.24409e+07	4.28906e+07	5.69948e+07	6.33873e+07	9.77192e+07	7.05703e+07	4.62108e+07	3.66269e+07	3.81678e+07					1.7415	1.25767	0.823544	0.652745	0.680207
NV2t006169002.1		17	7.07193	2.3902e+08	2.03606e+08	2.38878e+08	3.84528e+08	4.53179e+08	3.06636e+08	1.89879e+08	1.89019e+08	2.3811e+08					1.66961	1.12971	0.699554	0.696385	0.877249
NV2t006171001.1		5	7.90433	2.99064e+08	2.55122e+08	2.85891e+08	5.45175e+07	6.2804e+07	7.61781e+07	7.85984e+07	7.99289e+07	5.88059e+07					0.45186	0.548083	0.565497	0.575069	0.423095
NV2t006174001.1		16	7.00934	3.49934e+08	3.69852e+08	3.90276e+08	2.32056e+08	2.23787e+08	2.61227e+08	2.63942e+08	2.58792e+08	2.10105e+08					0.78676	0.918385	0.927933	0.909826	0.73866
NV2t006175001.1		5	6.57172	5.44522e+07	5.68738e+07	6.1214e+07	1.9557e+08	2.39658e+08	1.92729e+08	8.22653e+07	6.42325e+07	7.42123e+07					2.11213	1.69854	0.725012	0.566087	0.65404
NV2t006176001.1		17	7.14434	2.47044e+08	2.82511e+08	2.75562e+08	2.43802e+08	1.82525e+08	2.17892e+08	8.55625e+08	9.9876e+08	8.57773e+08					0.394745	0.471232	1.85045	2.16	1.85509
NV2t006180001.1		9	6.74517	1.04113e+08	9.94315e+07	9.61285e+07	6.38845e+07	6.34472e+07	7.29813e+07	7.24909e+07	7.63787e+07	6.86844e+07					0.79581	0.915395	0.909243	0.958007	0.861498
NV2t006188001.1		12	7.33823	3.79174e+08	2.97225e+08	3.43077e+08	6.33376e+08	8.12079e+08	7.04923e+08	1.01734e+09	1.0116e+09	1.00965e+09					1.17722	1.02189	1.47477	1.46645	1.46363
NV2t006193001.1		6	6.51845	3.21338e+07	3.48512e+07	3.82583e+07	3.47664e+07	2.44616e+07	3.27038e+07	2.08964e+07	2.73663e+07	1.86469e+07					0.833652	1.11455	0.712147	0.932642	0.635487
NV2t006194001.1		8	7.21519	8.48048e+07	8.83837e+07	6.28764e+07	1.85102e+08	3.79237e+08	3.05681e+08	5.68058e+08	2.65868e+08	4.63668e+08					1.41996	1.14455	2.12696	0.99548	1.73609
NV2t006199001.1		9	7.70258	3.38345e+08	2.33869e+08	3.00783e+08	7.34461e+08	8.50823e+08	4.73367e+08	4.70122e+08	5.8675e+08	8.20024e+08					1.59246	0.885987	0.879913	1.0982	1.53481
NV2t006201001.1		3	5.79855	1.77035e+07	1.96504e+07	1.74181e+07	3.74068e+07	3.34913e+07	4.01545e+07	2.43042e+07	2.44406e+07	2.29983e+07					1.26878	1.52121	0.92074	0.925907	0.871266
NV2t006212001.1		5	6.39727	7.85148e+07	7.08223e+07	4.98137e+07	5.05838e+07	6.56644e+07	9.47446e+07	4.86009e+07	4.14795e+07	4.08737e+07					1.09219	1.57587	0.808372	0.689923	0.679846
NV2t006216001.1		11	6.96494	1.0796e+08	1.25456e+08	1.02722e+08	2.21429e+08	1.98842e+08	2.01756e+08	3.51857e+08	3.36968e+08	4.05613e+08					0.871857	0.884634	1.54278	1.47749	1.77848
NV2t006219001.1		3	6.53538	4.18242e+07	3.682e+07	4.79967e+07	3.94166e+07	4.75955e+07	3.72528e+07	6.09132e+07	5.72656e+07	5.6129e+07					1.0074	0.788486	1.28928	1.21207	1.18802
NV2t006220001.1		4	6.14463	2.48098e+07	2.67304e+07	1.95629e+07	3.68781e+07	4.08819e+07	3.05681e+07	2.86442e+07	2.39673e+07	4.37993e+07					1.33387	0.997358	0.934587	0.781989	1.42906
NV2t006223001.1		6	7.33961	6.74426e+07	6.49498e+07	6.05197e+07	6.26439e+07	6.31052e+07	8.15358e+07	5.02741e+07	5.17893e+07	4.3018e+07					1.04157	1.34578	0.82979	0.8548	0.710027
NV2t006225001.1		2	6.47806	4.05296e+07	3.22495e+07	4.62964e+07	1.42992e+07	2.09427e+07	2.06159e+07	9.70091e+06	8.31889e+06	5.88687e+06					0.94792	0.93313	0.439087	0.376534	0.266454
NV2t006244001.1		3	5.87224	9.18861e+06	8.66764e+06	7.37988e+06	7.7916e+06	1.00217e+07	1.00019e+07	1.39119e+07	1.1459e+07	1.34856e+07					0.981371	0.979427	1.36231	1.12211	1.32057
NV2t006245001.1	Fibrinogen-related protein-3
NV2t006247002.1		16	7.022	2.35147e+08	1.82009e+08	1.73807e+08	9.50922e+07	1.29473e+08	1.9339e+08	1.45494e+08	1.37969e+08	9.67315e+07					0.838852	1.25296	0.942647	0.893894	0.626719
NV2t006248002.1		24	8.38437	1.10767e+09	1.17192e+09	1.25485e+09	4.27515e+08	3.99823e+08	4.05235e+08	3.82625e+08	3.86452e+08	3.56104e+08					0.610709	0.618975	0.584439	0.590285	0.543929
NV2t006249001.1		10	6.44863	1.1985e+08	1.22723e+08	9.28034e+07	1.47848e+08	1.53075e+08	2.18833e+08	7.93166e+07	7.47679e+07	6.91641e+07					1.27754	1.82634	0.661965	0.624002	0.577233
NV2t006253001.1		2	6.33984	1.22123e+08	1.14803e+08	9.97902e+07	3.64864e+08	5.21827e+08	2.29914e+08	4.94058e+08	3.6724e+08	9.5894e+08					1.43466	0.632103	1.35831	1.00965	2.63641
NV2t006255001.1		4	5.7464	1.21e+07	1.76436e+07	1.47848e+07	2.5191e+07	2.67948e+07	3.46336e+07	3.37597e+07	2.1753e+07	2.00843e+07					1.16643	1.50767	1.46963	0.946951	0.874309
NV2t006256001.1		2	6.35812	2.82861e+07	2.54624e+07	2.49421e+07	1.49352e+07	1.82915e+07	1.5823e+07	1.77022e+07	1.60467e+07	1.89377e+07					0.912412	0.789276	0.883014	0.800439	0.944646
NV2t006258001.1		4	6.23457	3.83423e+07	3.80952e+07	3.53741e+07	3.21184e+07	3.85297e+07	4.12418e+07	3.93442e+07	3.29894e+07	3.31916e+07					1.05328	1.12742	1.07554	0.901823	0.907352
NV2t006268001.1		16	6.37823	8.21717e+07	1.06373e+08	8.37658e+07	9.60269e+07	7.07859e+07	9.27969e+07	1.03944e+08	1.08859e+08	1.05452e+08					0.749343	0.982353	1.10036	1.15239	1.11632
NV2t006269001.1	Bone morphogenetic protein 7, TGF-beta family
NV2t006272001.1		9	6.33618	6.80884e+07	6.98245e+07	6.37949e+07	4.44561e+07	3.90153e+07	4.54955e+07	3.98348e+07	4.42334e+07	4.15194e+07					0.769596	0.897421	0.785762	0.872525	0.818992
NV2t006283003.1		14	7.37353	2.18638e+08	1.85409e+08	1.841e+08	4.11153e+08	5.40217e+08	3.11089e+08	5.56264e+08	4.98926e+08	8.72591e+08					1.28678	0.741004	1.325	1.18843	2.07848
NV2t006288003.1		8	6.46125	7.33804e+07	8.51052e+07	8.37192e+07	6.6966e+07	5.08223e+07	5.67113e+07	2.04659e+08	2.32371e+08	2.11695e+08					0.429311	0.479058	1.72882	1.96291	1.78825
NV2t006292001.1		2	5.93	1.3925e+07	1.25096e+07	1.07093e+07	1.48724e+07	2.50341e+07	1.72061e+07	2.17864e+07	1.43984e+07	2.44714e+07					1.45441	0.999626	1.26573	0.836507	1.42172
NV2t006293003.1		8	6.96578	7.81618e+07	7.0247e+07	8.63475e+07	8.45522e+07	9.32502e+07	6.5586e+07	7.56261e+07	7.62499e+07	8.82002e+07					1.16851	0.821855	0.947668	0.955485	1.10523
NV2t006304001.1		12	7.56109	3.78405e+08	3.31412e+08	2.94618e+08	1.4817e+08	1.58955e+08	1.88284e+08	2.96114e+08	3.14962e+08	2.99116e+08					0.593599	0.703126	1.1058	1.17619	1.11701
NV2t006305001.1		2	6.28235	3.04955e+07	2.80063e+07	3.37223e+07	4.51827e+07	4.76431e+07	3.65392e+07	5.19807e+07	5.3644e+07	5.80916e+07					1.11285	0.853486	1.21417	1.25302	1.35691
NV2t006315001.1	Apextrin-like-3
NV2t006324001.1		2	6.35778	4.0829e+06	6.11153e+06	5.88081e+06	2.26173e+07	6.35439e+06	8.57461e+06	8.17838e+06	1.94347e+07	1.4968e+07					0.594469	0.802177	0.765108	1.81817	1.40029
NV2t006326001.1		14	7.77949	2.37178e+08	2.54598e+08	2.71682e+08	2.44233e+08	2.20896e+08	2.29034e+08	3.68375e+08	3.79184e+08	3.42726e+08					0.780276	0.809019	1.30122	1.3394	1.21062
NV2t006327001.1		2	6.2992	1.67991e+07	1.33539e+07	1.10009e+07	1.80249e+07	1.75637e+07	2.38547e+07	4.5305e+07	5.84533e+07	5.22445e+07					0.616029	0.836682	1.58903	2.05019	1.83242
NV2t006328001.1		3	6.13546	2.79732e+07	2.32579e+07	1.87715e+07	1.85316e+07	1.5843e+07	1.3464e+07	1.09045e+07	1.53312e+07	2.23525e+07					0.856743	0.728093	0.589683	0.829065	1.20875
NV2t006331001.1		7	6.21919	4.82338e+07	5.17927e+07	4.06751e+07	5.70354e+07	5.11774e+07	4.73496e+07	1.56947e+08	1.6279e+08	2.24049e+08					0.548296	0.507287	1.68148	1.74408	2.40038
NV2t006333001.1		10	8.23516	6.12252e+08	4.15277e+08	5.23067e+08	1.41236e+09	1.64895e+09	8.86833e+08	1.27572e+09	1.60994e+09	2.37668e+09					1.3791	0.741699	1.06694	1.34647	1.98773
NV2t006344001.1	Neuropilin-related
NV2t006350001.1		2	5.73788	6.396e+06	5.42459e+06	4.76648e+06	1.08485e+07	1.4576e+07	1.43179e+07	9.69919e+06	8.50617e+06	9.85541e+06					1.55449	1.52697	1.03439	0.907161	1.05105
NV2t006351002.1		11	6.97361	1.36218e+08	1.02233e+08	1.22673e+08	1.19293e+08	1.19875e+08	1.07431e+08	1.03201e+08	1.36754e+08	1.27173e+08					1.00374	0.899543	0.864128	1.14507	1.06485
NV2t006356001.1		6	6.76845	4.32243e+07	4.20895e+07	4.44035e+07	5.26211e+07	7.35491e+07	6.52657e+07	9.03845e+07	6.63677e+07	7.08954e+07					1.20616	1.07032	1.48225	1.08839	1.16264
NV2t006365001.1	Anosmin-1-like
NV2t006366003.1		5	6.13313	1.44929e+07	1.63469e+07	1.19389e+07	2.49517e+07	2.10905e+07	2.15391e+07	4.90984e+07	5.14668e+07	6.90033e+07					0.678082	0.692504	1.57857	1.65471	2.21853
NV2t006368002.1		20	8.02293	5.3494e+08	3.88145e+08	4.98916e+08	1.69244e+09	1.9291e+09	1.36321e+09	1.95435e+09	2.36154e+09	2.59997e+09					1.30319	0.920907	1.32025	1.59533	1.75639
NV2t006373001.1		3	6.49716	2.66839e+07	3.77199e+07	2.20688e+07	4.6372e+07	1.46087e+07	3.41154e+07	1.60788e+07	3.60829e+07	2.64099e+07					0.505413	1.18028	0.556274	1.24835	0.913696
NV2t006380002.1		7	6.7895	8.08232e+07	6.06567e+07	8.78874e+07	9.91977e+07	1.70372e+08	8.19214e+07	7.59957e+07	5.89218e+07	8.45749e+07					1.91585	0.921212	0.854577	0.662579	0.951051
NV2t006381001.1		4	6.52916	6.3949e+07	4.65646e+07	6.94178e+07	9.14272e+07	1.80365e+08	9.33323e+07	4.65872e+07	3.24112e+07	4.20157e+07					2.4371	1.26112	0.629491	0.437943	0.56772
NV2t006382001.1		18	6.27439	1.51942e+08	1.25049e+08	1.21066e+08	1.74145e+08	2.41866e+08	2.40591e+08	2.11775e+08	1.85155e+08	1.92265e+08					1.3242	1.31722	1.15946	1.01371	1.05264
NV2t006383001.1		12	6.77818	1.92223e+08	2.44593e+08	2.17834e+08	2.41306e+08	1.82774e+08	2.5223e+08	1.50295e+08	1.55842e+08	1.26805e+08					0.932573	1.28696	0.766853	0.795157	0.646999
NV2t006385003.1		2	6.86685	1.71031e+07	1.47355e+07	2.22427e+07	4.09497e+07	5.86654e+07	5.07697e+07	4.52401e+08	3.66293e+08	2.80411e+08					0.405033	0.35052	3.12343	2.52893	1.93599
NV2t006394001.1		5	6.53472	4.94912e+07	5.46601e+07	5.06827e+07	3.84494e+07	4.52878e+07	3.94509e+07	3.81251e+07	2.92889e+07	3.62619e+07					1.06783	0.930207	0.898946	0.690599	0.855014
NV2t006400002.1		8	6.52767	6.30352e+07	6.10463e+07	6.00462e+07	6.49708e+07	6.81344e+07	5.50005e+07	4.69627e+07	4.62119e+07	5.82023e+07					1.17112	0.945368	0.807211	0.794307	1.0004
NV2t006403002.1		7	6.87313	8.4051e+07	8.50215e+07	1.21838e+08	1.76474e+08	2.00952e+08	1.1324e+08	1.21602e+08	1.05504e+08	1.30652e+08					1.58739	0.894522	0.960573	0.833411	1.03207
NV2t006409001.1		10	7.06059	1.16953e+08	1.09135e+08	1.00691e+08	2.37047e+08	2.42504e+08	2.3877e+08	5.65723e+08	5.92229e+08	6.51956e+08					0.764459	0.752688	1.78336	1.86692	2.0552
NV2t006411001.1	PAN/Apple domain-containing protein-1
NV2t006415001.1		13	6.97053	1.62518e+08	1.50272e+08	1.4757e+08	1.19731e+08	1.35663e+08	1.47729e+08	1.04761e+08	9.99295e+07	9.34507e+07					1.05109	1.14457	0.811663	0.774231	0.724035
NV2t006416001.1		2	6.11186	1.31115e+07	1.92699e+07	1.51013e+07	8.98557e+06	6.16549e+06	9.3931e+06	6.27968e+06	6.22321e+06	5.21256e+06					0.618319	0.942006	0.62977	0.624107	0.522752
NV2t006418001.1		4	6.36314	3.96547e+07	4.14192e+07	3.82529e+07	4.35948e+07	4.10461e+07	4.91709e+07	3.823e+07	3.88495e+07	3.51156e+07					1.01117	1.21133	0.941796	0.957059	0.865072
NV2t006419001.1		12	7.942	8.87649e+08	6.15311e+08	8.47043e+08	7.28209e+08	1.03983e+09	6.07722e+08	9.6952e+08	9.78866e+08	1.2167e+09					1.18599	0.693145	1.1058	1.11646	1.38772
NV2t006420001.1		2	6.14649	1.58157e+07	1.59189e+07	1.20245e+07	8.39146e+06	8.67487e+06	1.14223e+07	9.30248e+06	8.93462e+06	8.98342e+06					0.784911	1.0335	0.841698	0.808414	0.812829
NV2t006422001.1		4	7.80863	1.26361e+08	1.43851e+08	1.7007e+08	7.5087e+07	5.86611e+07	5.69898e+07	1.07443e+08	1.20731e+08	1.05116e+08					0.54749	0.531891	1.00277	1.1268	0.981061
NV2t006423001.1		2	6.01649	2.03547e+07	1.27703e+07	1.05394e+07	5.95206e+07	8.55547e+07	1.09277e+08	2.1563e+07	2.38957e+07	2.2669e+07					2.10297	2.68609	0.530027	0.587366	0.557215
NV2t006427001.1		2	6.4354	3.30851e+07	3.45308e+07	3.30642e+07	5.67183e+07	6.11206e+07	7.15817e+07	2.22533e+07	1.97734e+07	1.76331e+07					1.57275	1.84193	0.572618	0.508806	0.453732
NV2t006429001.1		10	6.48449	1.00864e+08	1.02475e+08	1.00216e+08	9.42108e+07	8.05959e+07	8.79779e+07	6.58172e+07	7.56783e+07	7.08932e+07					0.931473	1.01679	0.760671	0.874638	0.819335
NV2t006430002.1		6	7.36252	5.0205e+07	1.0545e+08	8.55303e+07	1.78188e+08	1.33294e+08	1.09616e+08	3.39823e+08	2.16144e+08	3.24058e+08					0.777826	0.639653	1.983	1.26129	1.89101
NV2t006433001.1		3	6.42833	2.14358e+07	2.22519e+07	5.46872e+07	7.44096e+07	7.21265e+07	2.04346e+07	1.8654e+07	1.8527e+07	2.66089e+07					1.97225	0.558771	0.51008	0.506608	0.727604
NV2t006437001.1	EGF-like repeat protein-18,partial
NV2t006438001.1	Fibropellin-like-7
NV2t006439001.1	Fibropellin-like-2
NV2t006441001.1	Fibropellin-like-8
NV2t006444001.1	Crumbs-like-3
NV2t006453001.1		6	6.6392	4.76249e+07	5.00345e+07	5.46375e+07	8.1898e+07	8.29954e+07	7.83004e+07	5.07518e+07	4.76388e+07	4.62426e+07					1.38294	1.30471	0.845669	0.793797	0.770534
NV2t006457001.1		3	5.96127	3.49511e+07	3.13261e+07	2.92276e+07	2.20249e+07	2.34473e+07	2.7768e+07	3.0286e+07	3.17208e+07	2.8709e+07					0.813325	0.963198	1.05054	1.10031	0.995838
NV2t006466001.1		2	6.44763	1.03509e+07	1.76286e+07	1.11015e+07	1.47944e+09	2.69113e+08	7.99961e+08	2.21762e+08	7.15378e+08	3.82163e+08					0.619932	1.8428	0.510854	1.64796	0.880358
NV2t006470001.1		7	8.38401	3.42098e+08	6.33801e+08	4.99752e+08	1.56277e+08	9.10293e+07	1.46573e+08	1.3681e+08	1.26693e+08	9.97911e+07					0.366918	0.590802	0.551449	0.51067	0.402235
NV2t006475001.1		3	5.7535	2.42801e+07	1.92438e+07	1.69739e+07	1.60474e+07	2.43117e+07	2.5367e+07	2.76046e+07	2.2975e+07	2.49646e+07					1.08444	1.13151	1.23132	1.02481	1.11356
NV2t006476001.1	Insulin-like growth factor-binding protein and Kazal domain-containing protein	3	6.23995	4.83792e+07	5.13085e+07	4.99053e+07	9.85292e+06	1.14741e+07	1.87636e+07	1.39589e+07	1.12951e+07	7.1015e+06					0.465085	0.760553	0.565801	0.45783	0.287848
NV2t006477001.1		9	7.25877	1.61351e+08	1.96739e+08	1.7972e+08	9.72957e+07	7.03896e+07	6.84623e+07	7.82507e+07	8.86507e+07	9.97802e+07					0.608766	0.592098	0.676753	0.766698	0.862952
NV2t006478002.1		2	6.42331	1.46255e+07	3.11878e+07	1.55852e+07	2.30174e+07	2.24993e+07	2.92404e+07	3.45676e+07	1.65733e+07	2.55199e+07					0.951495	1.23658	1.46186	0.700883	1.07924
NV2t006489001.1	Growth/differentiation factor 5-like
NV2t006490001.1		11	7.0253	2.69443e+08	2.64552e+08	2.73782e+08	4.56001e+08	4.43128e+08	4.15005e+08	4.88136e+08	5.11282e+08	5.27541e+08					1.09298	1.02362	1.204	1.26109	1.30119
NV2t006493001.1		4	6.11693	2.52372e+07	1.98964e+07	2.21611e+07	1.42308e+07	1.22853e+07	1.31236e+07	8.5372e+06	1.25358e+07	1.05361e+07					0.798074	0.852529	0.554589	0.814344	0.684444
NV2t006495001.1	Otolin-1-like	5	7.85133	5.39805e+07	6.48344e+07	4.61191e+07	7.70277e+07	6.63555e+07	1.00212e+08	8.46969e+07	8.18079e+07	7.61532e+07					0.917093	1.38503	1.17059	1.13066	1.05251
NV2t006516001.1		3	6.51033	3.54369e+07	4.85641e+07	3.7481e+07	1.45856e+07	1.20807e+07	1.25009e+07	2.50637e+07	2.2067e+07	2.7632e+07					0.461857	0.477919	0.958209	0.843639	1.0564
NV2t006519001.1		2	6.30403	2.14954e+07	2.81541e+07	2.0616e+07	8.94855e+06	1.0004e+07	1.04278e+07	5.0297e+06	3.43282e+06	4.49761e+06					0.799565	0.833437	0.401998	0.274368	0.35947
NV2t006520002.1		3	6.4458	9.49044e+07	8.00725e+07	8.18864e+07	2.80742e+07	3.85545e+07	4.44917e+07	6.52225e+07	5.62545e+07	4.76692e+07					0.646009	0.745491	1.09285	0.942585	0.798732
NV2t006520003.1		13	7.36647	3.39505e+08	4.05244e+08	3.37435e+08	1.75307e+08	1.83594e+08	2.5146e+08	2.54373e+08	2.03362e+08	1.78319e+08					0.709587	0.971889	0.983149	0.785991	0.689201
NV2t006522001.1		10	6.76249	1.31385e+08	1.51284e+08	1.28029e+08	5.33674e+07	5.07283e+07	6.35646e+07	6.07311e+07	5.54515e+07	5.22934e+07					0.61132	0.766009	0.731863	0.668239	0.630181
NV2t006526001.1		10	6.76317	1.02505e+08	1.12608e+08	1.14477e+08	7.31758e+07	5.65161e+07	6.45375e+07	6.09037e+07	7.17368e+07	6.17967e+07					0.708166	0.808677	0.763144	0.898887	0.774333
NV2t006527001.1		2	7.4647	5.93276e+07	8.34509e+07	7.19248e+07	5.59094e+07	3.77673e+07	5.2988e+07	2.66849e+08	2.80663e+08	2.32108e+08					0.297905	0.417964	2.10488	2.21384	1.83084
NV2t006530001.1		8	6.55947	3.62717e+07	3.83159e+07	3.81842e+07	8.02601e+07	6.91428e+07	8.58671e+07	9.82009e+07	1.07841e+08	8.71386e+07					0.970467	1.20521	1.37832	1.51362	1.22305
NV2t006534001.1		5	7.21354	5.07651e+07	5.16216e+07	5.05953e+07	2.22721e+07	1.44968e+07	2.15723e+07	1.47429e+07	2.22603e+07	1.5263e+07					0.494977	0.736566	0.503382	0.760058	0.52114
NV2t006535001.1		6	6.63118	4.9682e+07	4.14198e+07	6.51976e+07	4.13652e+07	6.01916e+07	3.77208e+07	3.81494e+07	3.14271e+07	3.18602e+07					1.3645	0.855101	0.864818	0.712428	0.722247
NV2t006537001.1		4	6.77047	3.41044e+07	3.28879e+07	4.23504e+07	1.60135e+08	3.8649e+08	1.81478e+08	1.61016e+08	6.9138e+07	1.14347e+08					2.94295	1.38187	1.22606	0.526455	0.8707
NV2t006539001.1		8	6.59588	7.44149e+07	7.21346e+07	7.10425e+07	7.29346e+07	6.12103e+07	7.03095e+07	7.2616e+07	8.92038e+07	7.88556e+07					0.831258	0.954829	0.986151	1.21142	1.07089
NV2t006545001.1		10	6.81648	1.2932e+08	1.27981e+08	7.89489e+07	5.57576e+07	5.6441e+07	8.47248e+07	8.11725e+07	8.09776e+07	8.74506e+07					0.648933	0.974129	0.933286	0.931044	1.00547
NV2t006548001.1		4	7.70284	1.75357e+08	1.36207e+08	1.66289e+08	4.7096e+08	5.30736e+08	3.2975e+08	5.96871e+08	6.81455e+08	8.9842e+08					1.19834	0.744534	1.34766	1.53864	2.02852
NV2t006553001.1		2	5.52832	1.51266e+07	1.40995e+07	1.41774e+07	1.47121e+07	1.14144e+07	1.41502e+07	1.84921e+07	2.55546e+07	2.05013e+07					0.693049	0.859158	1.12279	1.55161	1.24478
NV2t006554001.1		7	7.06816	3.34794e+07	4.09232e+07	4.10242e+07	5.29395e+07	4.01757e+07	5.49947e+07	7.77483e+07	8.3761e+07	6.10416e+07					0.74386	1.01824	1.43952	1.55085	1.1302
NV2t006558001.1		2	7.29842	2.26468e+07	2.45627e+07	2.46621e+07	6.92049e+07	5.80545e+07	5.03491e+07	4.09574e+07	4.49872e+07	5.16644e+07					1.34979	1.17064	0.952279	1.04597	1.20122
NV2t006579001.1		10	6.27728	5.91706e+07	5.69644e+07	5.77369e+07	8.45668e+07	1.19458e+08	9.0903e+07	5.13597e+07	3.77429e+07	4.89368e+07					1.77167	1.34818	0.761713	0.559764	0.725779
NV2t006584001.1		4	5.99582	1.70038e+07	1.96969e+07	1.63231e+07	2.19554e+07	1.94585e+07	2.38819e+07	1.8181e+07	1.7698e+07	1.74009e+07					1.02055	1.25255	0.953553	0.928218	0.912639
NV2t006585001.1		3	6.29196	3.3936e+07	3.82507e+07	3.6792e+07	3.15297e+07	2.97117e+07	3.32197e+07	2.19174e+07	2.0622e+07	1.91761e+07					1.00848	1.12756	0.743929	0.699958	0.650881
NV2t006586001.1		3	6.00337	1.59912e+07	1.45312e+07	1.31923e+07	1.22652e+07	1.38703e+07	1.64802e+07	1.64377e+07	1.59859e+07	1.48203e+07					0.934559	1.11041	1.10755	1.0771	0.998564
NV2t006587001.1		4	6.35708	3.29382e+07	3.66042e+07	4.49585e+07	2.82615e+07	2.89282e+07	1.92038e+07	3.48997e+07	3.06613e+07	3.76059e+07					0.885372	0.58775	1.06814	0.938415	1.15096
NV2t006593001.1		4	5.54404	6.67382e+06	7.50789e+06	5.78133e+06	1.1384e+07	9.20746e+06	1.02665e+07	8.93703e+06	9.81594e+06	1.14328e+07					1.02297	1.14062	0.99292	1.09057	1.27021
NV2t006594001.1		13	7.81575	6.47617e+08	5.69303e+08	6.60675e+08	3.1012e+08	3.38474e+08	3.59026e+08	4.56723e+08	4.75727e+08	3.86479e+08					0.724586	0.768583	0.977728	1.01841	0.827352
NV2t006602001.1		3	6.7475	3.25708e+07	2.83893e+07	3.1286e+07	2.99581e+07	3.67344e+07	3.26402e+07	3.2562e+07	3.04475e+07	3.10949e+07					1.15726	1.02828	1.02582	0.959202	0.979597
NV2t006603001.1		9	6.28207	4.76236e+07	4.39516e+07	4.43157e+07	5.2474e+07	4.06063e+07	5.83188e+07	5.68274e+07	7.95211e+07	5.49158e+07					0.763668	1.09678	1.06873	1.49553	1.03278
NV2t006613001.1		6	6.7192	6.17996e+07	4.36717e+07	3.6079e+07	3.17791e+07	4.14161e+07	4.82994e+07	4.65604e+07	5.05243e+07	5.2443e+07					0.903464	1.05362	1.01569	1.10215	1.14401
NV2t006616001.1		18	6.97673	2.91545e+08	2.50031e+08	3.93375e+08	4.66412e+08	5.40248e+08	2.61292e+08	1.3847e+08	1.39305e+08	1.83078e+08					1.82533	0.882823	0.467847	0.470669	0.618564
NV2t006628001.1		11	7.62119	3.03562e+08	2.62746e+08	4.48968e+08	6.94776e+08	7.80572e+08	4.48839e+08	3.64482e+08	3.74579e+08	3.81242e+08					1.73043	0.995021	0.808011	0.830396	0.845166
NV2t006642001.1		7	7.39274	2.23312e+08	1.74823e+08	1.78953e+08	9.5717e+07	1.01254e+08	1.09187e+08	9.99488e+07	1.20612e+08	1.09272e+08					0.75122	0.810073	0.741534	0.894839	0.810701
NV2t006642002.1		4	6.66398	8.30155e+07	7.6516e+07	7.32049e+07	4.01886e+07	5.81205e+07	5.69034e+07	4.97905e+07	3.73296e+07	3.98538e+07					1.01585	0.994577	0.870256	0.652459	0.696579
NV2t006646001.1		7	6.43271	5.13161e+07	5.31658e+07	5.38912e+07	1.60819e+08	2.18263e+08	1.76731e+08	9.25785e+07	6.57985e+07	8.017e+07					2.06182	1.66949	0.874544	0.621567	0.757326
NV2t006647001.1		2	5.98005	2.58435e+07	1.70424e+07	1.98862e+07	1.18269e+07	1.89599e+07	1.53917e+07	1.0898e+07	1.03022e+07	1.08761e+07					1.20997	0.98226	0.695484	0.657461	0.694084
NV2t006651001.1		4	7.29851	1.79537e+08	1.21719e+08	1.48016e+08	5.82759e+08	6.2849e+08	4.3332e+08	4.71332e+08	6.44229e+08	7.68409e+08					1.42199	0.980409	1.06641	1.4576	1.73856
NV2t006656001.1		2	6.00322	1.43905e+07	1.03727e+07	1.49994e+07	3.00559e+07	4.16765e+07	2.16963e+07	1.31231e+07	1.31216e+07	1.7431e+07					2.12074	1.10403	0.66778	0.667701	0.886989
NV2t006659001.1	Syndecan
NV2t006667003.1		2	6.13727	1.61421e+07	1.64639e+07	1.68418e+07	5.38837e+07	6.39536e+07	6.37237e+07	7.72876e+07	6.3805e+07	6.26003e+07					1.32409	1.31933	1.60015	1.32101	1.29607
NV2t006668002.1		2	6.14494	1.77201e+07	1.15873e+07	1.44311e+07	1.34471e+07	2.18737e+07	1.74622e+07	2.6945e+07	2.5316e+07	2.54633e+07					1.1298	0.901941	1.39174	1.3076	1.31521
NV2t006669001.1		3	5.38817	3.78849e+07	8.1664e+07	7.44225e+07	7.12079e+07	4.78564e+07	7.21897e+07	3.61931e+07	2.49675e+07	1.81627e+07					0.927153	1.39858	0.701192	0.483712	0.351877
NV2t006671001.1		3	6.15466	2.19587e+07	1.71769e+07	2.25637e+07	4.53461e+07	5.73679e+07	3.87201e+07	4.50904e+07	4.55346e+07	5.13598e+07					1.49604	1.00974	1.17587	1.18745	1.33936
NV2t006672001.1		6	7.67315	2.03006e+08	1.42785e+08	1.98081e+08	4.7688e+08	4.48594e+08	2.78225e+08	3.38023e+08	5.10568e+08	5.93423e+08					1.26579	0.785064	0.953794	1.44066	1.67445
NV2t006675001.1		11	7.13084	1.43362e+08	2.21256e+08	1.65419e+08	1.34137e+08	7.65065e+07	1.22339e+08	1.01639e+08	1.15392e+08	9.65229e+07					0.585224	0.935815	0.777469	0.882671	0.738337
NV2t006676002.1		7	6.2585	3.03503e+07	2.46913e+07	2.55157e+07	4.53471e+07	5.00245e+07	5.77004e+07	3.22252e+07	3.58845e+07	3.01065e+07					1.35672	1.5649	0.873982	0.973225	0.816521
NV2t006678002.1		2	6.7793	5.78968e+06	4.68238e+06	6.77505e+06	8.88322e+06	1.05309e+07	3.41511e+06	1.17337e+07	1.22308e+07	2.60664e+07					1.05184	0.341105	1.17197	1.22162	2.60354
NV2t006700002.1		2	6.05863	1.64232e+07	1.66979e+07	1.52154e+07	7.21444e+07	4.83266e+07	5.82966e+07	2.80444e+07	4.11514e+07	3.74386e+07					1.30323	1.5721	0.75628	1.10974	1.00961
NV2t006701001.1		15	7.19261	1.53178e+08	1.25738e+08	1.27464e+08	2.20716e+08	2.54063e+08	2.49302e+08	1.1955e+08	1.26444e+08	1.27117e+08					1.52075	1.49226	0.715597	0.75686	0.760891
NV2t006705001.1	TLDc domain-containing protein-2	16	7.62785	6.16766e+08	8.54103e+08	8.07215e+08	8.56863e+07	7.89978e+07	1.00784e+08	1.26716e+08	9.91893e+07	8.22665e+07					0.249316	0.318072	0.399915	0.31304	0.259632
NV2t006707001.1		9	6.35015	8.39431e+07	8.11945e+07	8.35624e+07	4.55318e+07	3.9206e+07	4.37399e+07	3.80691e+07	4.56793e+07	3.97854e+07					0.704706	0.786199	0.68427	0.821059	0.715119
NV2t006714001.1		2	5.99425	2.81804e+07	2.08247e+07	2.10324e+07	1.72886e+07	2.63239e+07	2.02147e+07	2.03461e+07	1.80711e+07	2.33007e+07					1.21133	0.930208	0.936252	0.831567	1.07221
NV2t006718001.1		16	8.02022	1.80859e+08	2.04653e+08	2.14515e+08	9.0495e+08	1.38604e+09	6.40514e+08	2.51402e+09	1.44966e+09	2.99285e+09					1.18938	0.549638	2.15733	1.24398	2.56822
NV2t006722001.1		5	6.06681	1.09459e+08	1.18798e+08	1.38313e+08	4.56286e+07	4.61911e+07	6.6189e+07	7.9818e+07	7.26017e+07	4.35189e+07					0.576974	0.826769	0.997009	0.90687	0.543595
NV2t006723001.1		5	6.76162	1.14922e+08	9.99303e+07	1.18087e+08	1.57916e+08	1.79288e+08	1.37556e+08	3.10643e+08	3.14465e+08	3.46859e+08					0.90668	0.695637	1.57096	1.59029	1.75411
NV2t006768001.1	ROR2-like	4	6.36904	6.18484e+07	5.22945e+07	6.21938e+07	3.64283e+07	3.96868e+07	3.24564e+07	1.23121e+08	1.33574e+08	1.37338e+08					0.526086	0.43024	1.63208	1.77065	1.82054
NV2t006770001.1		2	6.11702	1.39946e+07	1.397e+07	1.65963e+07	1.9112e+07	2.12029e+07	1.99582e+07	2.78415e+07	2.51244e+07	2.24681e+07					1.05857	0.996427	1.39	1.25435	1.12174
NV2t006771001.1	ADAM metalloprotease-2	15	7.13303	4.37444e+08	4.26547e+08	5.20131e+08	2.45369e+08	2.50072e+08	2.3055e+08	4.48801e+08	4.51326e+08	4.01474e+08					0.659682	0.608184	1.18392	1.19058	1.05908
NV2t006771002.1		15	7.13303	4.37444e+08	4.26547e+08	5.20131e+08	2.45369e+08	2.50072e+08	2.3055e+08	4.48801e+08	4.51326e+08	4.01474e+08					0.659682	0.608184	1.18392	1.19058	1.05908
NV2t006777001.1		22	7.97051	8.88035e+08	1.0032e+09	8.55197e+08	8.61019e+08	5.49277e+08	7.98887e+08	4.86477e+08	6.74609e+08	5.44117e+08					0.742175	1.07944	0.65732	0.911523	0.735203
NV2t006785001.1		16	7.9941	4.69518e+08	4.83568e+08	5.68545e+08	2.62475e+08	3.62211e+08	3.33702e+08	2.00232e+08	1.40793e+08	1.29984e+08					1.10467	1.01772	0.610665	0.429388	0.396423
NV2t006802001.1		5	6.4015	5.28533e+07	5.38542e+07	4.91871e+07	3.95519e+07	3.33807e+07	4.11333e+07	5.70529e+07	6.63023e+07	5.89131e+07					0.664324	0.818612	1.13544	1.31951	1.17246
NV2t006808001.1		4	6.34008	4.49358e+07	3.78653e+07	4.63395e+07	2.80653e+07	3.41286e+07	2.76826e+07	1.13063e+08	1.10268e+08	1.11088e+08					0.555001	0.450175	1.83864	1.79318	1.80651
NV2t006810001.1	MAM and LDL-receptor class A domain-containing protein-like
NV2t006821001.1		12	6.99048	6.02872e+07	5.41089e+07	6.56497e+07	1.69119e+08	1.50243e+08	1.65289e+08	1.08302e+09	1.35743e+09	1.01699e+09					0.328032	0.360882	2.3646	2.96372	2.22042
NV2t006824001.1		13	6.5236	1.55194e+08	1.78631e+08	1.33928e+08	1.70162e+08	1.75623e+08	2.89055e+08	1.96339e+08	1.6517e+08	1.33854e+08					0.989142	1.62802	1.10582	0.93027	0.75389
NV2t006828001.1		3	5.9215	2.77395e+07	2.636e+07	2.40235e+07	2.40243e+07	3.18443e+07	3.01035e+07	6.41812e+07	5.09221e+07	5.91076e+07					0.847159	0.800847	1.70742	1.35469	1.57245
NV2t006837001.1		3	6.11414	2.08562e+07	2.40998e+07	1.87247e+07	1.80227e+07	1.49638e+07	2.62881e+07	1.14074e+07	1.18826e+07	8.70575e+06					0.869142	1.52689	0.662572	0.690175	0.505655
NV2t006852001.1		4	6.36198	1.60049e+07	1.38488e+07	1.26657e+07	4.68693e+07	4.31852e+07	3.49988e+07	2.72048e+07	3.41009e+07	4.60091e+07					1.41391	1.14589	0.890702	1.11649	1.50637
NV2t006855001.1		6	6.57786	5.41221e+07	5.40921e+07	9.60419e+07	8.40525e+07	9.20884e+07	5.81142e+07	3.09063e+07	2.82071e+07	2.51749e+07					1.5853	1.00044	0.532052	0.485586	0.433386
NV2t006857001.1		13	6.90019	1.47155e+08	1.31904e+08	1.95185e+08	1.16537e+08	1.53889e+08	1.44057e+08	1.14381e+08	9.65725e+07	6.97192e+07					1.18437	1.1087	0.880306	0.743247	0.536577
NV2t006858002.1		7	6.74756	9.22167e+07	7.61226e+07	8.33997e+07	1.42253e+08	2.24023e+08	1.3116e+08	1.29401e+08	9.94782e+07	1.55089e+08					1.77931	1.04174	1.02777	0.790106	1.23179
NV2t006859001.1		3	7.51842	4.4904e+08	3.63381e+08	4.62325e+08	3.6219e+08	4.3935e+08	2.57776e+08	6.8926e+08	7.01708e+08	9.40056e+08					0.847606	0.497307	1.32974	1.35375	1.81358
NV2t006872001.1		5	6.46164	6.08284e+07	5.3755e+07	5.8932e+07	1.61606e+08	2.13771e+08	1.24891e+08	1.49051e+08	1.27426e+08	1.98955e+08					1.67413	0.978077	1.16728	0.997929	1.5581
NV2t006876001.1		5	6.78106	1.29867e+08	1.18635e+08	1.49603e+08	7.05842e+08	1.07962e+09	4.69529e+08	6.10824e+08	4.3688e+08	7.96631e+08					2.16048	0.939594	1.22234	0.874257	1.59417
NV2t006878001.1		3	5.97776	1.02263e+07	9.36695e+06	7.15573e+06	8.88126e+06	9.00092e+06	1.15933e+07	1.45116e+07	1.56224e+07	1.58777e+07					0.792365	1.02057	1.27748	1.37527	1.39774
NV2t006880001.1		8	6.81735	1.09661e+08	9.89076e+07	9.97295e+07	7.2242e+07	8.84165e+07	8.31137e+07	8.49888e+07	7.69427e+07	8.11798e+07					1.00071	0.940695	0.961917	0.870851	0.918806
NV2t006883001.1		12	7.28989	1.38453e+08	1.45824e+08	1.59839e+08	1.88558e+08	1.51921e+08	1.91585e+08	5.23891e+08	6.16978e+08	4.46358e+08					0.533387	0.672647	1.83936	2.16618	1.56714
NV2t006884002.1		7	6.56341	7.86452e+07	7.05537e+07	6.49793e+07	8.36509e+07	8.82564e+07	8.45146e+07	1.02438e+08	1.08159e+08	1.22641e+08					0.988143	0.946249	1.14693	1.21098	1.37313
NV2t006885001.1		7	7.05356	8.93696e+07	9.98587e+07	1.10764e+08	1.11566e+08	1.37198e+08	1.11183e+08	1.90091e+08	1.38254e+08	1.5381e+08					1.08115	0.876152	1.49797	1.08947	1.21206
NV2t006892001.1	Protein sidekick-1 homolog
NV2t006897002.1	EGF-like repeat protein-11
NV2t006900001.1		11	6.67251	7.76081e+07	9.39431e+07	8.88636e+07	7.67756e+07	7.32306e+07	7.21555e+07	1.1249e+08	9.73675e+07	1.0447e+08					0.827044	0.814903	1.27043	1.09964	1.17985
NV2t006901001.1		7	6.57414	5.01818e+07	6.12378e+07	3.68669e+07	1.94875e+07	1.65449e+07	3.40782e+07	1.93005e+07	1.86172e+07	1.5014e+07					0.548795	1.13038	0.640198	0.617533	0.498016
NV2t006903001.1		5	6.63393	2.68772e+07	2.81797e+07	3.5188e+07	4.40668e+07	3.90273e+07	3.71171e+07	2.63743e+07	2.83855e+07	2.39026e+07					1.21489	1.15542	0.821008	0.883616	0.744067
NV2t006908001.1		3	5.98384	2.12176e+07	1.79729e+07	1.82436e+07	3.13021e+07	4.25424e+07	3.66366e+07	5.94033e+07	5.15665e+07	5.89922e+07					1.1332	0.975885	1.58232	1.37357	1.57137
NV2t006919001.1	Mucin-like-5
NV2t006921001.1		14	7.82841	4.66191e+08	4.31974e+08	4.75925e+08	5.63769e+08	6.27832e+08	5.29596e+08	8.06407e+08	7.80986e+08	8.40377e+08					1.02307	0.862993	1.31407	1.27264	1.36942
NV2t006928001.1		3	6.64669	5.68938e+07	4.46947e+07	4.40989e+07	3.05613e+07	3.72944e+07	4.09553e+07	4.54934e+07	4.74253e+07	4.3771e+07					0.858027	0.942251	1.04666	1.09111	1.00703
NV2t006931001.1		3	6.91028	2.37303e+07	1.8708e+07	2.52731e+07	5.38051e+07	7.96469e+07	4.7734e+07	4.90974e+07	4.20449e+07	5.19322e+07					1.82876	1.09601	1.12732	0.965385	1.19241
NV2t006934001.1		12	7.45295	1.80443e+08	1.5849e+08	1.68333e+08	1.85233e+08	1.97963e+08	1.82923e+08	1.21639e+08	1.29501e+08	1.31957e+08					1.22327	1.13033	0.751641	0.80022	0.815398
NV2t006935001.1		11	6.85446	1.02908e+08	1.1352e+08	1.18603e+08	3.25912e+08	2.39977e+08	2.53457e+08	1.35928e+08	1.67241e+08	1.51565e+08					1.34223	1.41762	0.760267	0.935406	0.847724
NV2t006947001.1		7	6.26926	6.54612e+07	5.30246e+07	6.6016e+07	9.89936e+07	1.4226e+08	1.0713e+08	7.225e+07	6.20287e+07	6.61619e+07					1.74594	1.31479	0.886713	0.761269	0.811994
NV2t006949001.1		3	6.11701	3.36893e+07	2.50398e+07	3.35092e+07	6.50284e+07	1.17419e+08	6.88219e+07	1.66004e+07	1.23615e+07	1.57602e+07					2.72202	1.59544	0.384833	0.286567	0.365356
NV2t006950001.1		3	6.16697	1.29691e+07	1.12443e+07	1.1469e+07	5.91816e+07	9.51823e+07	4.89939e+07	1.34082e+08	9.60959e+07	1.83038e+08					1.31335	0.676031	1.8501	1.32596	2.5256
NV2t006955001.1		12	7.07359	1.73155e+08	1.37402e+08	1.8069e+08	2.12945e+08	2.72635e+08	2.32195e+08	2.23882e+08	2.20228e+08	1.96641e+08					1.3265	1.12973	1.08929	1.07151	0.956749
NV2t006957001.1		3	6.01246	1.62024e+07	1.67389e+07	1.6157e+07	2.05444e+07	2.36444e+07	2.3697e+07	2.37161e+07	1.99336e+07	2.06063e+07					1.17413	1.17674	1.17769	0.989862	1.02326
NV2t006965001.1		20	6.8233	2.42989e+08	2.61569e+08	2.04369e+08	1.5832e+08	1.35011e+08	2.0313e+08	2.57935e+08	2.80803e+08	2.38881e+08					0.612754	0.921916	1.17066	1.27444	1.08418
NV2t006968001.1		4	6.18823	5.15842e+07	4.89665e+07	4.11368e+07	3.62594e+07	3.62422e+07	3.48396e+07	4.66471e+07	4.91331e+07	6.08411e+07					0.804091	0.772973	1.03494	1.0901	1.34986
NV2t006969001.1		3	5.91427	4.09043e+06	3.11072e+06	4.73277e+06	8.05301e+06	5.03468e+06	6.07481e+06	7.40792e+06	1.5571e+07	8.48231e+06					0.724326	0.873967	1.06576	2.24016	1.22033
NV2t006970001.1		7	6.46396	7.36059e+07	7.11799e+07	6.55339e+07	9.75438e+07	8.02026e+07	9.69612e+07	4.54959e+07	5.71827e+07	5.1376e+07					1.12947	1.36548	0.640705	0.805287	0.723513
NV2t006971001.1		2	7.36789	1.35933e+07	1.20483e+07	1.27293e+07	1.04847e+07	1.08871e+07	1.02959e+07	1.06381e+07	1.15514e+07	1.15615e+07					0.944058	0.8928	0.922467	1.00167	1.00254
NV2t006977001.1		3	5.98585	2.4866e+07	2.05937e+07	2.52069e+07	2.20173e+07	2.91518e+07	2.78541e+07	3.59591e+07	3.2772e+07	2.80225e+07					1.06461	1.01722	1.31321	1.19682	1.02337
NV2t006986001.1		13	6.8364	1.88633e+08	2.59538e+08	1.80088e+08	9.32842e+07	7.6359e+07	1.05817e+08	1.18498e+08	1.05148e+08	1.09354e+08					0.555689	0.770061	0.862347	0.765194	0.795805
NV2t006987001.1		2	5.64629	7.92806e+06	8.58301e+06	7.35613e+06	1.04472e+07	7.67077e+06	8.94399e+06	5.26983e+06	6.62536e+06	6.6301e+06					0.993989	1.15898	0.682872	0.858523	0.859138
NV2t006996001.1		3	5.90777	1.30215e+07	1.30863e+07	1.06413e+07	1.57481e+07	1.30217e+07	1.51928e+07	1.21502e+07	1.46121e+07	1.54021e+07					0.953767	1.11279	0.889935	1.07026	1.12812
NV2t006998001.1		8	6.25299	3.84769e+07	5.29362e+07	3.76075e+07	3.51306e+07	2.62807e+07	4.40338e+07	4.22452e+07	4.10204e+07	3.44621e+07					0.67158	1.12525	1.07954	1.04824	0.880649
NV2t006999001.1		7	6.35699	5.73656e+07	5.98411e+07	5.63186e+07	4.13771e+07	4.13888e+07	3.8176e+07	4.38299e+07	4.19783e+07	4.83591e+07					0.869037	0.801578	0.920292	0.881415	1.01539
NV2t007002001.1		7	6.46717	4.744e+07	4.42118e+07	4.68694e+07	2.36049e+07	2.54555e+07	3.16328e+07	4.33157e+07	4.30724e+07	3.26967e+07					0.677209	0.841549	1.15236	1.14588	0.869853
NV2t007012001.1		3	6.44508	1.72683e+07	1.69084e+07	2.05209e+07	9.42977e+07	1.60151e+08	6.7262e+07	1.5979e+08	9.60271e+07	1.88397e+08					1.75642	0.737681	1.75246	1.05316	2.0662
NV2t007016001.1		85	7.4565	1.36635e+09	1.74943e+09	1.12239e+09	9.12738e+08	8.32355e+08	1.16888e+09	1.28963e+09	1.10381e+09	1.22518e+09					0.695512	0.976709	1.07761	0.922339	1.02375
NV2t007017001.1		15	6.82135	2.05627e+08	1.99514e+08	2.25644e+08	1.37718e+08	1.41407e+08	1.3577e+08	1.33323e+08	1.33739e+08	1.23165e+08					0.886314	0.850983	0.835646	0.838252	0.771973
NV2t007029001.1		3	6.9753	8.67922e+07	9.01499e+07	1.03939e+08	2.64279e+07	3.81873e+07	3.97221e+07	3.67289e+07	2.44564e+07	2.03928e+07					0.736265	0.765856	0.708145	0.471527	0.393181
NV2t007033001.1		19	7.97461	4.95883e+08	4.62065e+08	4.76816e+08	3.8139e+08	4.29976e+08	3.69285e+08	4.90016e+08	4.66162e+08	5.25999e+08					0.944405	0.811102	1.07628	1.02388	1.15531
NV2t007036001.1	Plasminogen-related
NV2t007037002.1		3	6.5162	7.71177e+07	7.54581e+07	8.35263e+07	6.42901e+07	6.61863e+07	6.43143e+07	1.07888e+08	1.07035e+08	9.95133e+07					0.799213	0.776608	1.30277	1.29247	1.20164
NV2t007038001.1	Microfibril-associated glycoprotein 4-like-1	7	6.88523	8.07537e+07	9.58064e+07	7.78374e+07	6.51195e+07	5.65756e+07	6.46523e+07	8.30561e+07	8.05281e+07	8.67384e+07					0.736802	0.841988	1.08167	1.04874	1.12962
NV2t007046001.1		10	6.848	8.46849e+07	8.12495e+07	8.06185e+07	1.26497e+08	1.5354e+08	1.52339e+08	8.5183e+07	7.31008e+07	7.42559e+07					1.51608	1.50422	0.841112	0.72181	0.733216
NV2t007050001.1		3	6.58424	1.79921e+07	2.46087e+07	1.99457e+07	6.1844e+07	2.73762e+07	6.03493e+07	6.19745e+07	1.02295e+08	5.72544e+07					0.56818	1.25252	1.28625	2.12309	1.18829
NV2t007052001.1	Collagen-like-8	2	6.36223	1.52137e+07	1.3216e+07	1.50473e+07	7.67781e+06	8.83754e+06	1.09686e+07	1.86827e+07	1.86727e+07	1.32142e+07					0.654468	0.812287	1.38356	1.38282	0.978584
NV2t007057001.1		10	7.21579	2.29534e+08	2.98882e+08	2.73702e+08	5.41606e+07	3.89992e+07	6.83361e+07	5.85696e+07	6.24271e+07	3.89057e+07					0.312405	0.54741	0.469175	0.500076	0.311656
NV2t007058001.1		3	6.41671	2.41746e+07	2.11428e+07	2.2778e+07	1.5102e+07	1.66207e+07	1.82874e+07	2.02355e+07	2.10098e+07	1.77247e+07					0.844761	0.929473	1.02849	1.06784	0.90087
NV2t007063001.1		16	7.28528	3.37893e+08	3.36982e+08	3.6413e+08	2.17559e+08	2.03813e+08	2.10678e+08	2.28327e+08	2.44232e+08	2.18664e+08					0.776502	0.802659	0.869899	0.930494	0.833084
NV2t007076001.1		2	6.98507	1.74277e+08	1.84417e+08	2.27876e+08	3.84433e+07	5.30958e+07	4.33337e+07	3.19812e+07	2.18686e+07	2.16855e+07					0.599592	0.489353	0.361153	0.246954	0.244887
NV2t007077001.1		10	7.97675	3.1874e+08	2.46958e+08	2.88192e+08	3.86035e+08	3.98988e+08	3.41378e+08	3.62597e+08	4.52512e+08	4.5322e+08					1.10536	0.945757	1.00454	1.25364	1.2556
NV2t007079001.1	Intelectin-like-1
NV2t007080001.1		11	8.03628	1.75183e+08	1.44881e+08	1.57418e+08	2.83111e+08	2.56095e+08	2.08306e+08	2.50954e+08	3.35241e+08	3.79338e+08					1.05219	0.855845	1.03107	1.37737	1.55855
NV2t007086001.1		9	6.51244	1.06371e+08	1.58005e+08	1.56042e+08	7.10604e+08	2.59559e+08	2.96003e+08	1.54627e+08	2.84811e+08	2.52894e+08					0.981972	1.11985	0.58499	1.07751	0.956758
NV2t007087001.1		2	6.46137	5.10703e+07	3.61874e+07	8.43126e+07	4.71485e+07	8.13401e+07	2.38435e+07	1.10517e+08	9.03507e+07	1.32295e+08					1.11414	0.326591	1.51379	1.23756	1.81208
NV2t007090001.1		2	5.56082	1.5398e+07	1.86875e+07	1.52782e+07	3.58096e+07	1.71032e+07	2.7469e+07	8.61722e+06	1.48569e+07	1.1315e+07					0.935539	1.50255	0.47136	0.81267	0.618929
NV2t007095001.1		3	6.42958	1.16533e+07	1.26549e+07	1.11475e+07	2.04669e+07	1.90428e+07	1.78788e+07	1.94608e+07	1.92485e+07	2.32746e+07					1.10694	1.03928	1.13124	1.1189	1.35293
NV2t007100001.1		7	7.14002	2.18724e+08	1.4979e+08	2.0067e+08	4.81801e+08	6.91848e+08	4.17369e+08	4.48264e+08	4.55544e+08	5.63682e+08					1.71642	1.03546	1.11211	1.13017	1.39845
NV2t007104001.1		2	6.83895	3.23251e+07	4.61609e+07	2.87615e+07	1.08293e+08	7.78063e+07	1.441e+08	7.30585e+07	7.11618e+07	6.16702e+07					1.08848	2.01589	1.02206	0.995522	0.86274
NV2t007107001.1		13	8.28181	7.98065e+08	5.81127e+08	7.7921e+08	9.10652e+08	9.73455e+08	6.28808e+08	1.24704e+09	1.60107e+09	1.84858e+09					0.935213	0.604106	1.19805	1.53818	1.77596
NV2t007108001.1		7	6.90548	5.47995e+07	5.80781e+07	5.64821e+07	5.03019e+07	4.38919e+07	5.58036e+07	6.05693e+07	6.54548e+07	5.29394e+07					0.792717	1.00785	1.09392	1.18216	0.95612
NV2t007110001.1		3	6.38086	1.59194e+07	2.22981e+07	2.04476e+07	2.84146e+07	1.81958e+07	3.14562e+07	1.46983e+07	1.63765e+07	1.03306e+07					0.919305	1.58926	0.742599	0.827388	0.521933
NV2t007116001.1		3	6.36048	3.1534e+07	3.02977e+07	2.38084e+07	2.98164e+07	2.63449e+07	3.53653e+07	1.94027e+07	2.2841e+07	2.16534e+07					0.983574	1.32035	0.724389	0.852757	0.80842
NV2t007128001.1		2	5.78409	7.67939e+06	6.04174e+06	6.12025e+06	8.51078e+06	1.33042e+07	9.55896e+06	8.78084e+06	7.13519e+06	9.80372e+06					1.55635	1.11822	1.0272	0.834687	1.14686
NV2t007130001.1		3	7.38151	1.90815e+08	1.53431e+08	2.95893e+08	9.44687e+08	1.51351e+09	4.44268e+08	1.0994e+09	8.52874e+08	1.50666e+09					1.94551	0.571076	1.4132	1.09631	1.93671
NV2t007137001.1		3	6.13115	3.92444e+07	3.17214e+07	3.26229e+07	2.07614e+07	2.65626e+07	3.33197e+07	3.10557e+07	3.00108e+07	2.32644e+07					0.890157	1.1166	1.04073	1.00571	0.779629
NV2t007143001.1		8	6.85475	1.47873e+08	1.47974e+08	1.01818e+08	8.88868e+07	6.59457e+07	1.11224e+08	4.92928e+07	6.63531e+07	5.71774e+07					0.709479	1.19661	0.530319	0.713863	0.615145
NV2t007165001.1		4	6.82693	5.92542e+07	4.16802e+07	5.1213e+07	3.01648e+07	3.435e+07	3.55883e+07	3.5217e+07	4.39381e+07	3.45162e+07					0.844853	0.875308	0.866178	1.08068	0.848941
NV2t007167007.1		7	6.80618	5.18293e+07	5.0807e+07	6.51086e+07	2.73363e+08	4.25544e+08	2.53817e+08	1.04341e+09	6.83325e+08	8.94026e+08					1.0237	0.610588	2.51006	1.64382	2.15069
NV2t007177001.1		3	6.33207	1.79324e+07	2.0361e+07	2.38833e+07	3.50622e+07	4.08472e+07	4.40026e+07	2.83699e+07	2.14338e+07	1.69629e+07					1.47726	1.59138	1.02601	0.775167	0.613475
NV2t007196001.1		2	6.26773	3.62219e+07	2.7103e+07	2.74276e+07	6.58548e+07	8.36369e+07	6.54411e+07	5.75151e+07	6.04854e+07	7.63908e+07					1.50523	1.17776	1.03511	1.08857	1.37482
NV2t007198001.1		3	6.14601	4.25923e+07	3.97733e+07	4.89739e+07	5.34107e+07	7.34929e+07	4.98774e+07	3.20891e+07	2.49578e+07	2.98667e+07					1.67438	1.13635	0.731081	0.56861	0.680448
NV2t007200001.1		3	6.04443	2.96652e+07	2.9453e+07	2.71832e+07	1.32934e+07	1.39923e+07	1.52355e+07	2.29669e+07	2.19632e+07	2.1856e+07					0.643789	0.700988	1.05671	1.01053	1.0056
NV2t007201001.1		3	5.60882	1.25314e+07	9.4552e+06	6.74109e+06	1.49617e+07	1.46153e+07	1.26565e+07	9.34402e+06	1.26695e+07	2.05214e+07					1.15896	1.00364	0.740961	1.00467	1.6273
NV2t007207001.1		11	7.29151	3.42361e+07	3.91611e+07	4.55436e+07	4.34e+08	4.80585e+08	3.26936e+08	2.37835e+09	1.87651e+09	2.37192e+09					0.541522	0.368391	2.67992	2.11445	2.67267
NV2t007209001.1		5	6.80429	7.91855e+06	7.92998e+06	1.18806e+07	2.1076e+08	2.00671e+08	9.88505e+07	7.73946e+08	8.11172e+08	1.09917e+09					0.560481	0.276093	2.16166	2.26564	3.07002
NV2t007220001.1	Semaphorin-like-1	3	7.05017	6.89335e+07	7.54875e+07	8.39022e+07	1.71596e+07	1.33127e+07	1.4161e+07	2.27966e+07	2.68161e+07	2.2682e+07					0.347034	0.369149	0.594262	0.699041	0.591273
NV2t007223003.1		8	8.12732	1.96365e+08	1.80568e+08	2.13791e+08	1.5672e+08	1.42037e+08	1.18793e+08	1.53651e+08	1.84249e+08	1.86071e+08					0.834287	0.697761	0.902504	1.08223	1.09293
NV2t007226001.1		5	5.99621	2.40157e+07	1.93492e+07	2.41821e+07	1.90351e+07	2.5459e+07	1.97888e+07	1.70892e+07	1.58487e+07	1.63154e+07					1.26533	0.983522	0.849349	0.787697	0.810891
NV2t007228001.1		11	7.27365	9.1392e+07	8.12746e+07	8.62205e+07	5.07083e+07	4.50462e+07	5.67484e+07	4.58955e+07	5.80591e+07	4.34443e+07					0.725526	0.914004	0.739206	0.935115	0.699725
NV2t007230001.1		3	5.58805	1.09914e+07	1.19962e+07	8.87775e+06	7.7433e+06	8.21875e+06	1.29849e+07	1.08329e+07	9.34548e+06	7.9932e+06					0.83126	1.31332	1.09566	0.945219	0.808448
NV2t007243001.1		3	5.65372	1.5937e+07	1.3446e+07	1.28915e+07	1.25212e+07	1.45357e+07	1.37222e+07	1.66747e+07	1.70141e+07	1.87985e+07					0.965181	0.911165	1.10721	1.12975	1.24823
NV2t007246001.1		14	7.48593	3.72534e+08	4.68293e+08	3.7678e+08	5.31789e+08	2.94757e+08	4.16151e+08	2.26916e+08	3.25473e+08	2.86531e+08					0.804073	1.13522	0.619009	0.887862	0.781631
NV2t007251001.1		2	6.23796	1.64819e+07	1.96409e+07	1.85652e+07	9.41775e+06	1.0342e+07	8.13157e+06	1.7328e+07	1.32332e+07	1.78061e+07					0.710807	0.558885	1.19096	0.909521	1.22382
NV2t007253001.1		2	6.02746	2.6675e+07	2.50437e+07	1.50838e+07	2.49181e+07	2.3134e+07	4.31389e+07	2.25302e+07	2.58323e+07	2.30009e+07					0.907782	1.69278	0.884089	1.01366	0.902559
NV2t007260001.1		11	6.27171	1.15543e+08	1.30841e+08	1.44585e+08	1.30342e+08	1.04578e+08	1.11046e+08	1.01565e+08	1.11716e+08	9.52113e+07					0.900304	0.955983	0.874363	0.96175	0.819666
NV2t007263003.1		7	6.59724	7.81487e+07	5.84286e+07	1.00804e+08	1.28076e+08	2.40486e+08	9.92061e+07	1.3367e+08	9.51557e+07	1.33704e+08					2.02718	0.836257	1.12677	0.802114	1.12706
NV2t007274001.1		14	8.28683	1.22234e+09	1.59038e+09	1.0918e+09	2.97119e+08	2.27777e+08	5.08538e+08	3.34734e+08	3.35382e+08	2.18824e+08					0.351815	0.785468	0.517018	0.518018	0.337987
NV2t007276001.1		5	6.71363	1.02945e+08	1.00082e+08	1.77926e+08	5.00346e+07	6.43414e+07	3.44359e+07	5.99735e+07	4.79419e+07	5.03874e+07					0.841592	0.450425	0.78446	0.627085	0.659073
NV2t007277001.1		2	5.88789	7.45036e+06	1.06843e+07	9.95939e+06	9.68556e+06	7.58879e+06	7.58906e+06	8.99207e+06	7.99777e+06	8.57985e+06					0.869752	0.869783	1.03058	0.916624	0.983337
NV2t007278001.1	Spongin-like-1	2	6.04168	1.13763e+07	2.30811e+07	1.05349e+07	5.43177e+06	4.57207e+06	6.57337e+06	7.14181e+06	4.17931e+06	6.36895e+06					0.519163	0.746412	0.810959	0.474565	0.7232
NV2t007279001.1		5	7.13414	1.01739e+08	7.43816e+07	9.80206e+07	2.48888e+08	4.24957e+08	1.78698e+08	2.40994e+08	1.92936e+08	3.48177e+08					2.00368	0.842566	1.13629	0.909699	1.64166
NV2t007282001.1	Fibrinogen-related protein-13
NV2t007285001.1		10	7.50908	6.07108e+08	4.21345e+08	4.2094e+08	7.3936e+08	1.2351e+09	7.47907e+08	3.71453e+08	3.20192e+08	5.29293e+08					2.06129	1.2482	0.619926	0.534375	0.88335
NV2t007286002.1		26	6.93561	2.62619e+08	2.71462e+08	2.4939e+08	2.25484e+08	2.06844e+08	2.44738e+08	2.23796e+08	2.35867e+08	2.16996e+08					0.871046	1.03062	0.942433	0.993267	0.913797
NV2t007291001.1		5	6.28239	2.1891e+07	2.95591e+07	2.74128e+07	2.49071e+07	2.51815e+07	2.93086e+07	4.15976e+07	3.04516e+07	2.82129e+07					0.87665	1.02033	1.44815	1.06012	0.982182
NV2t007293001.1		2	5.94723	1.04599e+07	1.1794e+07	1.37542e+07	7.63203e+06	8.28373e+06	6.29764e+06	8.61164e+06	7.03217e+06	7.93194e+06					0.911444	0.692918	0.947523	0.773737	0.872736
NV2t007296001.1		4	6.22834	6.62819e+07	6.55221e+07	6.10982e+07	1.0129e+08	1.01886e+08	9.03505e+07	7.86308e+07	7.90276e+07	9.5573e+07					1.23972	1.09936	0.956759	0.961588	1.16291
NV2t007297001.1		32	6.9745	3.78609e+08	4.52796e+08	2.8069e+08	3.06794e+08	2.56658e+08	2.91324e+08	3.371e+08	3.36717e+08	4.78555e+08					0.74054	0.840562	0.972639	0.971534	1.38078
NV2t007298001.1		12	6.5058	7.44766e+07	7.45817e+07	8.85539e+07	4.49796e+07	3.38719e+07	4.70834e+07	5.27117e+07	6.98548e+07	4.23259e+07					0.576882	0.801891	0.897748	1.18972	0.720864
NV2t007301001.1		10	6.71862	1.48615e+08	1.16701e+08	1.25823e+08	1.37704e+08	1.68188e+08	1.36166e+08	8.99803e+07	9.37593e+07	1.07416e+08					1.34628	1.08995	0.720258	0.750507	0.859821
NV2t007304001.1		2	6.31286	1.32941e+07	1.41758e+07	1.21379e+07	2.49493e+07	1.60703e+07	1.98002e+07	1.00431e+07	1.4613e+07	1.38519e+07					1.04101	1.28262	0.650576	0.946604	0.8973
NV2t007306001.1		5	6.15035	3.04358e+07	3.55415e+07	4.33271e+07	4.574e+07	3.96316e+07	3.16652e+07	4.07692e+07	4.02681e+07	4.13437e+07					1.02283	0.817232	1.05219	1.03926	1.06702
NV2t007307001.1		21	8.07652	7.37147e+08	8.35447e+08	8.47149e+08	3.7411e+08	3.51468e+08	3.70012e+08	3.51937e+08	3.30323e+08	3.09444e+08					0.701839	0.738869	0.702776	0.659615	0.617921
NV2t007311001.1		11	6.75099	1.31365e+08	1.21944e+08	1.05285e+08	1.08013e+08	1.10323e+08	1.59124e+08	1.25725e+08	1.32518e+08	1.06417e+08					0.902059	1.30108	1.02799	1.08353	0.870123
NV2t007335001.1		2	6.19518	2.27937e+07	2.22152e+07	2.85694e+07	6.8261e+06	4.13192e+06	3.92074e+06	7.31445e+06	1.23906e+07	1.0154e+07					0.314305	0.298241	0.556391	0.942521	0.77239
NV2t007340001.1		2	6.08976	1.04829e+07	1.07544e+07	1.09207e+07	2.51954e+07	2.17799e+07	2.50515e+07	1.71441e+07	1.93198e+07	1.65413e+07					1.24702	1.43434	0.981596	1.10616	0.947082
NV2t007349001.1		5	6.74441	9.71916e+07	8.58314e+07	8.33914e+07	4.16657e+07	4.74273e+07	4.9834e+07	5.37405e+07	5.3427e+07	5.23362e+07					0.755686	0.794033	0.856279	0.851283	0.833903
NV2t007357001.1		2	5.87073	1.40426e+07	1.24534e+07	1.17646e+07	3.27931e+07	4.03427e+07	2.90186e+07	4.32278e+07	3.95973e+07	5.82744e+07					1.28975	0.927721	1.38199	1.26592	1.86303
NV2t007360001.1		6	6.30464	3.69384e+07	3.18909e+07	3.17024e+07	4.17248e+07	5.23422e+07	4.63035e+07	2.21322e+07	2.04223e+07	2.32236e+07					1.53606	1.35885	0.649504	0.599323	0.681533
NV2t007369001.1		5	7.17736	4.73571e+07	4.53105e+07	1.12115e+08	4.75178e+08	6.5642e+08	1.00917e+08	5.33867e+08	4.03663e+08	1.06117e+09					1.71938	0.264334	1.39837	1.05733	2.77955
NV2t007370001.1		3	5.73241	1.25132e+07	1.30464e+07	1.13741e+07	4.86882e+07	2.44358e+07	3.91953e+07	2.3217e+07	4.4341e+07	3.17091e+07					0.884929	1.41943	0.840789	1.60578	1.14833
NV2t007371001.1		5	6.49922	6.5875e+07	7.19775e+07	9.1567e+07	7.02389e+07	9.53217e+07	4.88076e+07	6.73564e+07	4.53956e+07	6.96932e+07					1.36993	0.701445	0.968022	0.65241	1.00161
NV2t007375001.1		4	6.49223	7.8238e+07	7.57474e+07	7.6906e+07	3.39663e+07	3.96623e+07	4.71513e+07	3.8842e+07	3.43359e+07	2.84481e+07					0.787475	0.936167	0.77119	0.681723	0.564823
NV2t007376001.1		3	6.598	3.19664e+07	3.13545e+07	2.73565e+07	1.07074e+07	9.77717e+06	1.34453e+07	1.16316e+07	1.29787e+07	1.08174e+07					0.549845	0.756133	0.654135	0.72989	0.608348
NV2t007377001.1		4	7.6101	3.49364e+08	1.77364e+08	3.27695e+08	5.65346e+07	8.40178e+07	6.96235e+07	1.60797e+08	2.1299e+08	1.39119e+08					0.479339	0.397217	0.917382	1.21516	0.793701
NV2t007378001.1		15	7.40197	3.47125e+08	4.45983e+08	3.67872e+08	1.60447e+08	1.27618e+08	1.42248e+08	1.69258e+08	1.65524e+08	1.80037e+08					0.545347	0.607865	0.723287	0.707331	0.769348
NV2t007385001.1		9	6.7425	7.52479e+07	6.87601e+07	6.35578e+07	8.58593e+07	9.81769e+07	7.18579e+07	2.99381e+08	2.86343e+08	4.23255e+08					0.600088	0.439218	1.82991	1.75022	2.58706
NV2t007391001.1		5	6.18365	2.71938e+07	3.35124e+07	3.07349e+07	3.99572e+07	3.95961e+07	4.22526e+07	3.4433e+07	2.81779e+07	2.87935e+07					1.16975	1.24822	1.01722	0.832431	0.850617
NV2t007395001.1		10	7.5414	2.89024e+08	2.67889e+08	2.30483e+08	1.28459e+08	1.20055e+08	1.59039e+08	2.26236e+08	2.61008e+08	2.29012e+08					0.565346	0.748926	1.06536	1.22911	1.07843
NV2t007398001.1		5	6.14921	2.94813e+07	2.82472e+07	2.95993e+07	3.1231e+07	4.13597e+07	3.29213e+07	3.08101e+07	2.4266e+07	2.90941e+07					1.34377	1.06961	1.00101	0.788397	0.945261
NV2t007400001.1		2	6.35515	2.62923e+07	2.10646e+07	2.053e+07	3.28117e+07	3.96928e+07	4.15477e+07	2.46536e+07	2.54214e+07	2.49196e+07					1.39038	1.45536	0.863577	0.890472	0.872895
NV2t007401001.1		15	6.83516	2.527e+08	2.23865e+08	1.95966e+08	1.09854e+08	1.19314e+08	1.52782e+08	1.45064e+08	1.50672e+08	1.34422e+08					0.723289	0.926177	0.879392	0.913384	0.814874
NV2t007403001.1		3	6.32564	5.77425e+07	4.55784e+07	5.47185e+07	3.75467e+07	4.65959e+07	4.47755e+07	3.64526e+07	3.71891e+07	3.22375e+07					1.06753	1.02582	0.83514	0.852012	0.73857
NV2t007405001.1		3	6.18991	2.16908e+07	5.87907e+07	3.78249e+07	1.07021e+08	4.80792e+07	9.92163e+07	8.7445e+07	7.17697e+07	5.40578e+07					0.738549	1.52407	1.34325	1.10246	0.830387
NV2t007410002.1		124	8.3424	6.33222e+09	5.60667e+09	5.48662e+09	4.33083e+09	4.28151e+09	5.46784e+09	9.46239e+09	1.08032e+10	8.64464e+09					0.637806	0.81453	1.40959	1.60932	1.28777
NV2t007411001.1		3	6.03885	1.31724e+07	1.78564e+07	1.54646e+07	1.03738e+07	8.56125e+06	1.17962e+07	1.67851e+07	1.49942e+07	1.25657e+07					0.633804	0.873293	1.24263	1.11004	0.930258
NV2t007413001.1		2	7.22571	4.71893e+07	4.04811e+07	3.09173e+07	2.15036e+08	2.70639e+08	1.9162e+08	1.00543e+08	9.30657e+07	1.72109e+08					2.09689	1.48466	0.779001	0.721067	1.33349
NV2t007416001.1		12	6.54802	1.00877e+08	1.01513e+08	1.03613e+08	1.16452e+08	9.45845e+07	1.04895e+08	1.47165e+08	1.7994e+08	1.58969e+08					0.768279	0.852032	1.19538	1.46159	1.29125
NV2t007419001.1		2	6.14516	2.55553e+07	2.41741e+07	2.54624e+07	2.01046e+07	2.01028e+07	2.01918e+07	3.27565e+07	3.46092e+07	3.27144e+07					0.767703	0.771099	1.25093	1.32168	1.24933
NV2t007427001.1		2	6.49171	1.01491e+07	8.53884e+06	1.0637e+07	2.22213e+07	2.58217e+07	2.47441e+07	1.77457e+08	1.81398e+08	1.51963e+08					0.379155	0.363332	2.60571	2.66357	2.23135
NV2t007430001.1	CTLD protein-1
NV2t007446001.1		5	6.74462	7.90825e+07	6.24445e+07	6.65466e+07	6.15085e+07	9.0567e+07	9.52166e+07	1.65913e+08	1.42613e+08	1.27291e+08					0.914631	0.961587	1.67555	1.44024	1.2855
NV2t007447001.1		5	6.5147	5.21064e+07	6.30959e+07	3.25401e+07	3.24784e+07	2.71339e+07	4.60039e+07	2.35063e+07	2.32211e+07	2.6558e+07					0.747618	1.26754	0.647669	0.63981	0.731751
NV2t007449001.1		18	6.9027	3.05393e+08	3.73531e+08	3.30076e+08	1.49053e+08	1.47087e+08	1.92769e+08	1.99889e+08	1.65505e+08	1.42915e+08					0.659842	0.86477	0.896714	0.742466	0.641123
NV2t007451001.1		18	7.75734	5.06867e+08	5.31703e+08	4.42031e+08	4.83358e+08	4.15141e+08	4.00754e+08	3.67357e+08	4.07485e+08	5.0776e+08					0.919707	0.887835	0.813845	0.902746	1.1249
NV2t007453001.1		7	6.83793	1.04475e+08	1.01576e+08	1.47168e+08	9.83224e+07	1.12664e+08	7.59467e+07	5.9574e+08	5.34405e+08	5.47192e+08					0.437533	0.29494	2.31356	2.07537	2.12503
NV2t007461001.1		16	6.96983	1.77735e+08	2.21248e+08	1.57044e+08	1.55379e+08	1.09286e+08	1.52745e+08	1.08781e+08	1.24165e+08	1.25161e+08					0.738673	1.03242	0.735261	0.839241	0.845971
NV2t007464001.1		7	6.66225	7.01846e+07	6.435e+07	7.76453e+07	1.28368e+08	1.74281e+08	1.1314e+08	1.0179e+08	8.17206e+07	1.04331e+08					1.71272	1.11187	1.00033	0.803099	1.0253
NV2t007465001.1		4	6.62061	2.31873e+07	1.50015e+07	4.82409e+07	1.14701e+08	2.30219e+08	4.08301e+07	4.2852e+07	3.29789e+07	5.78269e+07					3.42001	0.606551	0.636587	0.489918	0.859046
NV2t007466001.1		2	6.31767	1.43826e+07	1.88144e+07	1.63885e+07	2.12212e+07	1.47561e+07	1.8817e+07	1.84944e+07	2.03195e+07	1.82936e+07					0.822385	1.04871	1.03073	1.13244	1.01954
NV2t007467001.1		3	6.5137	2.09771e+07	6.1334e+07	2.46855e+07	3.34149e+07	1.85191e+07	3.91198e+07	5.32086e+07	3.2815e+07	3.85983e+07					0.516537	1.09113	1.4841	0.915277	1.07659
NV2t007470001.1		6	6.60825	6.06333e+07	4.95602e+07	3.79143e+07	4.91085e+08	5.0142e+08	7.07262e+08	1.22589e+08	1.46795e+08	1.36043e+08					2.00274	2.8249	0.489638	0.586318	0.543373
NV2t007471001.1		2	6.19221	2.02762e+07	1.84379e+07	1.6857e+07	1.61298e+07	1.96592e+07	1.51358e+07	1.15759e+07	1.0438e+07	1.48295e+07					1.23436	0.950346	0.726828	0.655384	0.931114
NV2t007473001.1		6	6.42706	7.1872e+07	8.20665e+07	8.67612e+07	8.70315e+07	8.30537e+07	9.70115e+07	1.89504e+08	1.73802e+08	1.40749e+08					0.738729	0.862877	1.68556	1.5459	1.2519
NV2t007489001.1		3	5.87155	1.3168e+07	1.03327e+07	1.06856e+07	1.08723e+07	1.15427e+07	1.3458e+07	9.93883e+06	1.19229e+07	9.88864e+06					1.02038	1.18969	0.878595	1.05398	0.874158
NV2t007502001.1	Leucine-rich repeat-containing G protein-coupled receptor-like-2
NV2t007504001.1		9	6.16678	7.74589e+07	7.07924e+07	6.04685e+07	7.74325e+07	7.09004e+07	9.66117e+07	8.46957e+07	1.01145e+08	8.69032e+07					0.878436	1.19699	1.04936	1.25316	1.07671
NV2t007510001.1		7	6.71713	1.28516e+08	1.41203e+08	1.53947e+08	9.31913e+07	8.28254e+07	8.11457e+07	5.57017e+07	5.70057e+07	5.33706e+07					0.880179	0.862328	0.591938	0.605795	0.567165
NV2t007516001.1		3	5.78891	1.42336e+07	1.43771e+07	1.22512e+07	2.57806e+07	1.76199e+07	2.18651e+07	2.3262e+07	3.36749e+07	3.18467e+07					0.813597	1.00962	1.07412	1.55493	1.47052
NV2t007517001.1		4	6.90524	6.55158e+07	6.9994e+07	8.55201e+07	3.72915e+07	3.53297e+07	2.5563e+07	7.0272e+07	6.93847e+07	7.84869e+07					0.591723	0.428145	1.17696	1.1621	1.31455
NV2t007521001.1		5	7.264	1.16619e+08	8.55856e+07	1.18028e+08	6.22804e+08	1.11502e+09	4.55017e+08	4.46749e+08	3.39801e+08	6.0382e+08					2.57085	1.04911	1.03005	0.783465	1.3922
NV2t007522001.1		6	5.94977	2.47073e+07	2.43598e+07	2.36842e+07	2.12672e+07	2.3299e+07	2.0965e+07	1.7075e+07	1.57983e+07	1.80584e+07					1.10822	0.997204	0.812174	0.751448	0.858952
NV2t007525001.1		11	7.70546	3.38243e+08	3.02026e+08	3.03805e+08	1.81583e+08	1.42479e+08	1.7848e+08	1.41891e+08	2.0239e+08	1.60625e+08					0.657083	0.82311	0.65437	0.93338	0.740768
NV2t007531001.1		13	6.54374	1.07312e+08	1.14457e+08	8.9866e+07	1.34323e+08	1.38597e+08	1.35659e+08	8.28347e+07	7.52208e+07	9.78824e+07					1.27785	1.25076	0.763725	0.693526	0.902463
NV2t007533001.1		9	8.29552	5.79901e+08	7.41909e+08	7.19627e+08	4.8463e+08	3.00865e+08	3.42237e+08	2.30945e+08	2.90588e+08	2.63377e+08					0.684807	0.778976	0.525661	0.661416	0.59948
NV2t007550001.1		5	6.45159	4.24318e+07	3.86622e+07	3.90775e+07	3.43787e+07	3.02625e+07	3.34498e+07	2.60967e+07	3.25163e+07	2.91063e+07					0.890128	0.983876	0.767596	0.956418	0.856117
NV2t007551002.1		7	6.43797	5.07645e+07	5.30661e+07	4.11373e+07	6.49686e+07	5.90057e+07	6.81339e+07	4.52692e+07	4.7652e+07	5.3236e+07					1.09895	1.26896	0.843118	0.887496	0.991496
NV2t007565001.1		3	5.81101	9.01201e+06	1.1244e+07	9.56395e+06	2.56033e+07	1.82933e+07	1.9302e+07	1.17991e+07	1.32275e+07	1.47389e+07					1.23991	1.30827	0.799734	0.896549	0.998991
NV2t007605001.1		17	6.98472	2.1845e+08	1.80917e+08	2.20457e+08	1.81305e+08	2.33591e+08	1.82646e+08	1.87533e+08	1.75643e+08	1.84351e+08					1.19119	0.931395	0.956318	0.895684	0.94009
NV2t007612001.1		2	6.06589	4.29051e+06	4.74949e+06	3.52033e+06	1.38619e+07	6.75761e+06	6.95435e+06	5.06334e+06	9.37679e+06	1.22933e+07					0.909537	0.936016	0.681497	1.26206	1.6546
NV2t007629001.1		7	6.33567	1.01444e+08	8.07284e+07	1.46e+08	4.90723e+07	7.04661e+07	5.71886e+07	3.99312e+07	3.49216e+07	2.37932e+07					1.05078	0.85279	0.595449	0.520747	0.354801
NV2t007635001.1		6	6.87468	8.04665e+07	8.3976e+07	6.90049e+07	7.48387e+07	1.35603e+08	8.36498e+07	1.01723e+08	5.376e+07	1.0606e+08					1.54664	0.954081	1.16021	0.613169	1.20969
NV2t007636003.1		11	7.86006	5.16442e+08	4.61431e+08	4.57744e+08	6.71049e+08	5.39685e+08	5.86363e+08	8.16957e+08	1.1362e+09	1.0542e+09					0.778383	0.845706	1.17829	1.63873	1.52047
NV2t007637001.1		2	5.98076	1.27046e+07	1.28369e+07	1.3337e+07	1.62026e+07	1.73646e+07	1.7795e+07	2.24852e+07	2.07511e+07	1.94905e+07					1.02167	1.04699	1.32294	1.22091	1.14674
NV2t007638001.1		2	6.17206	1.30173e+07	1.47621e+07	1.56646e+07	1.43612e+07	1.27769e+07	1.26767e+07	1.3127e+07	1.30026e+07	1.23508e+07					0.944579	0.937169	0.970461	0.961262	0.913073
NV2t007641001.1	Apextrin-like-4
NV2t007642002.1		7	6.72322	8.77523e+07	9.72966e+07	7.26652e+07	9.60886e+07	9.94452e+07	1.14592e+08	6.72579e+07	5.85758e+07	6.8066e+07					1.17495	1.35392	0.794656	0.692076	0.804203
NV2t007648001.1		2	5.98072	5.19167e+06	6.50533e+06	4.97162e+06	7.29428e+06	4.48119e+06	5.36272e+06	4.68227e+06	6.07867e+06	6.64662e+06					0.787489	0.942402	0.822824	1.06822	1.16802
NV2t007658001.1		3	5.98084	2.07395e+07	2.218e+07	1.77598e+07	9.2581e+06	5.57924e+06	1.08293e+07	8.6383e+06	1.33948e+07	8.61884e+06					0.42918	0.833038	0.664497	1.03039	0.662999
NV2t007660001.1		10	7.3146	3.65705e+08	3.06066e+08	2.80342e+08	2.34311e+08	2.72304e+08	3.58614e+08	2.94452e+08	3.02548e+08	2.5082e+08					0.919546	1.21101	0.994337	1.02168	0.846995
NV2t007668001.1		7	7.2472	1.72483e+08	1.66684e+08	1.6353e+08	6.29911e+07	5.99023e+07	8.82958e+07	6.00696e+07	6.53234e+07	4.51732e+07					0.609553	0.89848	0.611256	0.664717	0.459673
NV2t007672001.1		2	6.26386	2.73395e+07	1.91361e+07	2.06308e+07	5.74345e+07	7.91865e+07	5.07277e+07	5.97015e+07	6.18257e+07	8.95212e+07					1.53098	0.980764	1.15426	1.19533	1.73079
NV2t007674001.1		2	5.82901	1.43934e+07	1.07558e+07	1.22457e+07	4.8317e+06	1.05792e+07	6.33354e+06	7.84149e+06	4.78953e+06	7.02704e+06					1.20832	0.723397	0.895631	0.547046	0.802606
NV2t007679001.1	Fibrinogen-related protein-22
NV2t007683001.1	EGF-like repeat protein-12
NV2t007697001.1		2	5.74219	1.05428e+07	8.92804e+06	7.5301e+06	3.6834e+07	4.20294e+07	4.02067e+07	1.26817e+07	1.31159e+07	1.62562e+07					2.01071	1.92351	0.606701	0.62747	0.777708
NV2t007698001.1		5	7.62059	1.20721e+08	1.06524e+08	1.05431e+08	1.26639e+08	1.52859e+08	1.33001e+08	1.78494e+08	1.6748e+08	1.94487e+08					1.07008	0.931064	1.24954	1.17243	1.36149
NV2t007702002.1		8	6.67739	5.9798e+07	5.58796e+07	5.44906e+07	5.04428e+07	5.41887e+07	6.23003e+07	5.00702e+07	4.98458e+07	4.44623e+07					1.01292	1.16454	0.935934	0.931739	0.831108
NV2t007703001.1		15	7.60469	2.67169e+08	3.07782e+08	3.24655e+08	2.39051e+08	1.78375e+08	1.76965e+08	4.2523e+08	4.94367e+08	4.72421e+08					0.556259	0.551864	1.32607	1.54168	1.47324
NV2t007709001.1		13	7.26694	3.897e+08	3.36944e+08	2.84609e+08	8.93216e+07	1.10514e+08	1.49138e+08	8.54766e+07	7.98516e+07	7.00544e+07					0.623353	0.841212	0.482129	0.450401	0.39514
NV2t007712001.1		3	6.23683	2.48551e+07	2.80119e+07	1.80415e+07	2.13e+07	1.62929e+07	3.19901e+07	2.33237e+07	2.70382e+07	2.13818e+07					0.690912	1.35657	0.989061	1.14658	0.906712
NV2t007713001.1		3	6.32723	2.39958e+07	2.01848e+07	2.41429e+07	2.25527e+07	2.06903e+07	2.06406e+07	2.59184e+07	3.35641e+07	2.813e+07					0.847117	0.84508	1.06117	1.3742	1.15172
NV2t007716002.1		38	8.75819	3.67437e+09	3.43253e+09	5.34278e+09	1.68508e+09	2.05116e+09	1.53736e+09	1.16197e+09	1.02119e+09	8.75369e+08					0.8883	0.665788	0.503214	0.442248	0.379097
NV2t007717001.1		7	7.55687	2.80425e+08	1.95027e+08	3.03784e+08	2.59245e+08	4.25152e+08	2.43798e+08	2.66739e+08	2.33722e+08	2.61673e+08					1.54941	0.888489	0.972093	0.851769	0.953631
NV2t007729002.1		6	7.19249	1.83608e+08	1.62409e+08	1.62492e+08	1.20396e+08	1.52489e+08	1.48074e+08	1.13122e+08	1.00909e+08	1.03867e+08					1.10024	1.06839	0.8162	0.728077	0.749423
NV2t007734001.1	Netrin
NV2t007737001.1		2	5.71956	6.71544e+06	8.83773e+06	1.0655e+07	1.75924e+07	2.1372e+07	9.1319e+06	1.58205e+07	9.88922e+06	1.91976e+07					1.6135	0.689421	1.19439	0.746595	1.44934
NV2t007750001.1		2	6.62844	2.43628e+07	2.20535e+07	2.32856e+07	3.78111e+07	6.06952e+07	4.10392e+07	1.30227e+08	8.95661e+07	1.25459e+08					0.985134	0.666101	2.1137	1.45373	2.03631
NV2t007751001.1		16	7.56438	3.65591e+08	3.245e+08	3.58077e+08	3.78275e+08	4.14559e+08	3.86568e+08	2.54512e+08	2.61478e+08	2.54125e+08					1.24464	1.1606	0.764125	0.78504	0.762964
NV2t007757001.1	Apextrin-like-1
NV2t007762001.1	Ig and CUB domain-containing protein
NV2t007765001.1		18	6.89144	2.26998e+08	2.81046e+08	2.47321e+08	2.18024e+08	1.4129e+08	2.03098e+08	1.38322e+08	1.72288e+08	1.36204e+08					0.720626	1.03587	0.705489	0.878724	0.694686
NV2t007769001.1		8	6.61227	4.5258e+07	4.60253e+07	5.38769e+07	5.70604e+07	4.83564e+07	4.92658e+07	4.54216e+07	5.26706e+07	4.41655e+07					0.984408	1.00292	0.924665	1.07223	0.899093
NV2t007773001.1		4	6.69834	1.19067e+08	1.70495e+08	1.2635e+08	8.3099e+07	4.43218e+07	5.60483e+07	3.25396e+07	4.2579e+07	4.54361e+07					0.554072	0.700667	0.406782	0.532285	0.568002
NV2t007776001.1		3	6.12414	1.86457e+07	1.9677e+07	1.65096e+07	4.80312e+06	5.021e+06	7.13068e+06	7.75354e+06	7.0239e+06	5.89488e+06					0.488744	0.6941	0.754729	0.683706	0.573808
NV2t007777001.1		7	6.87282	6.30828e+07	6.12258e+07	5.82816e+07	1.43081e+08	1.32271e+08	1.344e+08	1.72448e+08	1.92078e+08	1.9859e+08					1.03027	1.04686	1.34322	1.49612	1.54684
NV2t007781001.1		8	6.75851	8.44048e+07	8.22193e+07	9.49784e+07	1.69839e+08	1.95058e+08	1.60683e+08	1.0345e+08	9.2411e+07	9.71134e+07					1.62525	1.33883	0.861961	0.769979	0.80916
NV2t007782001.1		5	6.51086	6.95612e+07	6.91838e+07	6.82671e+07	9.99636e+07	9.39218e+07	8.61154e+07	1.19984e+08	1.28318e+08	1.41834e+08					0.963687	0.883588	1.2311	1.31661	1.45529
NV2t007783001.1		14	7.04443	2.34382e+08	2.17698e+08	2.70942e+08	1.11432e+08	1.12569e+08	1.09069e+08	1.68291e+08	1.79245e+08	1.48647e+08					0.652667	0.632375	0.975741	1.03925	0.861845
NV2t007789001.1		10	7.7568	2.49411e+08	1.68963e+08	3.24406e+08	7.22845e+08	1.47011e+09	5.19463e+08	3.37189e+08	2.44579e+08	3.60522e+08					3.00876	1.06314	0.6901	0.500562	0.737852
NV2t007796001.1		2	6.31599	2.63823e+07	2.16135e+07	2.58437e+07	1.2628e+07	1.61681e+07	9.37774e+06	1.13782e+07	1.08407e+07	1.56316e+07					0.970969	0.563175	0.68331	0.651034	0.938748
NV2t007799001.1		2	5.93394	1.28157e+07	1.4634e+07	1.15079e+07	7.52059e+06	6.88477e+06	9.76062e+06	8.62773e+06	8.24826e+06	7.3987e+06					0.708973	1.00512	0.888457	0.84938	0.761895
NV2t007800001.1		6	7.71383	1.05081e+08	1.04619e+08	1.86272e+08	4.61668e+07	4.27348e+07	3.07785e+07	1.00663e+08	1.09159e+08	8.51275e+07					0.474478	0.341729	1.11765	1.21198	0.945158
NV2t007802005.1		11	6.93161	1.39422e+08	1.73174e+08	1.86906e+08	4.73763e+08	3.42026e+08	3.30317e+08	1.52636e+08	1.70111e+08	1.63205e+08					1.44412	1.39469	0.644468	0.718251	0.689094
NV2t007804001.1		4	7.18005	3.05533e+07	4.12101e+07	4.03442e+07	4.8531e+07	4.61338e+07	4.93681e+07	4.17648e+07	3.25529e+07	3.10741e+07					1.14846	1.22897	1.03969	0.810374	0.77356
NV2t007809001.1		4	5.98142	3.8496e+07	4.40007e+07	4.25704e+07	3.41774e+07	2.86298e+07	3.68606e+07	6.87736e+07	7.17835e+07	5.76296e+07					0.609258	0.784413	1.46354	1.52759	1.22639
NV2t007819001.1		3	5.97789	2.86157e+07	2.47549e+07	3.01962e+07	6.3853e+07	1.09068e+08	7.76884e+07	3.40595e+07	2.30351e+07	2.65127e+07					2.34957	1.67358	0.733719	0.496229	0.571144
NV2t007820001.1		3	5.93248	9.79923e+06	8.76351e+06	1.22504e+07	7.76123e+06	9.48099e+06	7.79337e+06	1.17311e+07	1.07313e+07	9.33947e+06					0.973512	0.800225	1.20455	1.1019	0.95898
NV2t007821001.1		12	8.09756	4.19446e+08	2.63796e+08	3.6423e+08	9.71058e+08	1.31575e+09	6.09847e+08	9.73174e+08	1.14129e+09	1.78342e+09					1.51004	0.699899	1.11688	1.30982	2.04677
NV2t007825001.1	PAN/Apple domain-containing protein-2
NV2t007827001.1		27	7.83286	1.10034e+09	1.29509e+09	1.18722e+09	3.07033e+08	2.75835e+08	3.43041e+08	6.15208e+08	5.81448e+08	5.10031e+08					0.399424	0.496741	0.890854	0.841967	0.738552
NV2t007828001.1		4	7.13675	1.64384e+08	1.89261e+08	9.44241e+07	3.95503e+07	3.06769e+07	5.34644e+07	2.98696e+07	3.34266e+07	3.84441e+07					0.409936	0.714446	0.399147	0.446679	0.513729
NV2t007832001.1		11	6.83015	1.16018e+08	1.26565e+08	1.7579e+08	3.75396e+08	4.33985e+08	2.80912e+08	1.23793e+08	9.80951e+07	1.09115e+08					2.12314	1.37427	0.605618	0.479899	0.533812
NV2t007833001.1		3	6.36233	3.43927e+07	5.61787e+07	3.94727e+07	2.62121e+07	1.77109e+07	3.08876e+07	2.31742e+07	2.09838e+07	1.7125e+07					0.598932	1.04453	0.783682	0.709612	0.579118
NV2t007835003.1		15	7.00831	2.17704e+08	2.23635e+08	2.04167e+08	2.0087e+08	1.69134e+08	2.30977e+08	2.49153e+08	2.87875e+08	2.30905e+08					0.755654	1.03195	1.11316	1.28617	1.03164
NV2t007836001.1		5	6.94426	4.32031e+07	5.12042e+07	4.08471e+07	3.38987e+07	2.12709e+07	3.30433e+07	1.46219e+07	1.96487e+07	1.5856e+07					0.699716	1.08698	0.480993	0.646354	0.521592
NV2t007838001.1		18	8.2343	6.43009e+08	6.26785e+08	9.44877e+08	3.76099e+08	3.18323e+08	3.12584e+08	2.90192e+08	3.51515e+08	2.37466e+08					0.698613	0.686018	0.636876	0.771458	0.521158
NV2t007839001.1		2	5.94041	2.05389e+07	1.77491e+07	1.37374e+07	1.96772e+07	2.43994e+07	2.75123e+07	1.29116e+07	1.20418e+07	1.37984e+07					1.35246	1.52501	0.715695	0.667482	0.764852
NV2t007845001.1		3	6.55745	2.7984e+07	3.1652e+07	4.07459e+07	1.67247e+07	1.79296e+07	1.21947e+07	3.2064e+07	2.64265e+07	3.01835e+07					0.684031	0.465241	1.22327	1.0082	1.15153
NV2t007852004.1		3	5.87599	1.78424e+07	1.48145e+07	1.43765e+07	1.41756e+07	1.51908e+07	1.44746e+07	9.61895e+06	1.08039e+07	1.16842e+07					1.11169	1.05928	0.70393	0.790647	0.855071
NV2t007864001.1		8	6.77931	7.65764e+07	7.0929e+07	4.23772e+07	4.38008e+07	3.61741e+07	4.21643e+07	3.11186e+07	4.06538e+07	5.83793e+07					0.736287	0.858213	0.633389	0.827468	1.18825
NV2t007865001.1		13	6.81876	1.7587e+08	1.65187e+08	1.70447e+08	1.71695e+08	2.06513e+08	1.61921e+08	1.45348e+08	1.28576e+08	1.5893e+08					1.25203	0.981678	0.881202	0.779518	0.963546
NV2t007873001.1		3	6.36456	2.38023e+07	1.92083e+07	1.75753e+07	8.87162e+06	1.2202e+07	1.41721e+07	1.30947e+07	1.17902e+07	1.10948e+07					0.833147	0.967663	0.894099	0.80503	0.757544
NV2t007876001.1		2	6.19939	2.67475e+07	8.27828e+07	2.05903e+07	6.18282e+08	3.44474e+08	1.02171e+09	1.89294e+07	1.09707e+07	1.48715e+07					1.43573	4.25839	0.0788958	0.0457249	0.0619827
NV2t007890001.1		2	6.64586	2.30339e+07	3.15414e+07	2.39681e+07	1.03623e+08	6.47552e+07	7.74255e+07	3.73957e+07	4.36731e+07	4.8069e+07					1.28515	1.53661	0.742166	0.866749	0.953993
NV2t007891001.1		3	6.51527	4.9971e+07	4.74094e+07	6.10531e+07	2.3835e+07	3.21775e+07	2.74838e+07	3.0152e+07	2.35265e+07	2.13896e+07					0.913564	0.780302	0.856056	0.667949	0.607281
NV2t007896001.1		3	6.44053	2.70494e+07	2.04964e+07	2.22981e+07	1.02783e+07	1.59503e+07	1.39832e+07	3.40199e+07	2.8913e+07	3.03164e+07					0.706094	0.619014	1.50601	1.27993	1.34206
NV2t007899001.1	Spongin-like-2	11	7.77228	4.2596e+08	4.47433e+08	4.79495e+08	1.31523e+08	1.13779e+08	1.38006e+08	1.86752e+08	2.05386e+08	1.58013e+08					0.447881	0.543247	0.735131	0.808483	0.622005
NV2t007903001.1		3	6.9112	6.62814e+07	5.31575e+07	5.56927e+07	5.93291e+07	6.71945e+07	7.25526e+07	5.28715e+07	5.81712e+07	5.14242e+07					1.12685	1.2167	0.886651	0.975527	0.862381
NV2t007905001.1		3	6.0174	1.48894e+07	1.06453e+07	1.55132e+07	4.83239e+07	6.74653e+07	3.30503e+07	1.39787e+07	1.39957e+07	1.96051e+07					2.55694	1.25261	0.529794	0.530436	0.743034
NV2t007908001.1		18	6.67716	1.81143e+08	1.51188e+08	1.69467e+08	1.73892e+08	2.19368e+08	1.89041e+08	2.36589e+08	2.24561e+08	2.32486e+08					1.11058	0.957043	1.19776	1.13687	1.17699
NV2t007909001.1		7	6.44993	4.81263e+07	4.32489e+07	4.525e+07	4.88412e+07	5.0031e+07	3.36756e+07	4.26308e+07	4.62811e+07	6.572e+07					1.06247	0.715141	0.905315	0.982834	1.39564
NV2t007910001.1		2	5.90984	4.21888e+06	4.18589e+06	3.13495e+06	1.52576e+07	1.4373e+07	1.76602e+07	1.62302e+07	1.73539e+07	1.8859e+07					1.16252	1.42839	1.31273	1.40361	1.52535
NV2t007911002.1		7	7.30323	1.63548e+08	9.4382e+07	1.02835e+08	4.64329e+08	8.0137e+08	3.99354e+08	3.49965e+08	3.51155e+08	6.46748e+08					2.13782	1.06536	0.933603	0.936777	1.72533
NV2t007915001.1		3	6.415	2.03861e+07	2.32992e+07	1.95767e+07	5.22194e+07	3.79169e+07	4.81693e+07	2.4589e+07	2.96115e+07	2.77419e+07					1.20367	1.52913	0.780575	0.940013	0.880664
NV2t007918001.1		5	6.67821	2.94179e+07	4.12361e+07	3.09693e+07	5.73863e+07	3.65602e+07	5.87884e+07	7.18379e+07	8.0392e+07	6.65717e+07					0.695414	1.11822	1.36643	1.52914	1.26626
NV2t007919001.1		2	6.56345	2.60713e+07	3.38842e+07	3.87682e+07	2.12319e+07	1.24589e+07	1.40776e+07	2.06326e+07	2.70367e+07	2.09141e+07					0.521351	0.589088	0.863385	1.13137	0.875166
NV2t007936001.1		5	6.02671	1.37123e+07	1.15576e+07	1.35041e+07	2.61499e+07	3.17736e+07	2.24374e+07	2.34773e+07	2.29097e+07	2.7767e+07					1.47946	1.04474	1.09316	1.06673	1.2929
NV2t007937001.1		5	7.16024	9.12669e+07	8.23937e+07	8.15308e+07	9.43355e+07	1.01678e+08	8.34947e+07	8.08418e+07	8.3029e+07	1.02184e+08					1.1428	0.938431	0.908614	0.933197	1.14849
NV2t007948001.1		2	5.5911	4.84703e+06	4.98862e+06	4.14854e+06	6.8601e+06	7.77272e+06	6.71487e+06	6.92388e+06	5.93372e+06	8.25964e+06					1.23925	1.07059	1.10391	0.946046	1.31688
NV2t007952001.1	Slit homolog-like-1
NV2t007955001.1		21	7.44505	5.28088e+08	5.11242e+08	5.24241e+08	3.59505e+08	3.40029e+08	4.0829e+08	7.64324e+08	8.34203e+08	6.77529e+08					0.618553	0.742727	1.3904	1.51751	1.23251
NV2t007974001.1		3	6.06584	7.30993e+06	9.46153e+06	7.78121e+06	1.85095e+07	1.30745e+07	1.44168e+07	1.14038e+07	1.24651e+07	1.37461e+07					1.08784	1.19953	0.948835	1.03714	1.14372
NV2t007976001.1		6	6.58929	4.30073e+07	4.90038e+07	7.1528e+07	2.02593e+08	1.78596e+08	1.17277e+08	3.53674e+08	3.51879e+08	3.67129e+08					0.926603	0.608464	1.83495	1.82564	1.90476
NV2t007981001.1		2	6.49077	1.97397e+07	2.12512e+07	2.20064e+07	3.59616e+07	3.25663e+07	3.89556e+07	2.80996e+07	2.8804e+07	2.3254e+07					1.1694	1.39883	1.00901	1.0343	0.835013
NV2t007983001.1		9	7.07952	1.80681e+08	1.62559e+08	1.53373e+08	2.12593e+08	2.57617e+08	2.34164e+08	3.53037e+08	3.23609e+08	3.77355e+08					1.02819	0.934585	1.40902	1.29157	1.50608
NV2t007985001.1		4	6.32891	2.95233e+07	2.47707e+07	2.53472e+07	2.19855e+07	2.71283e+07	2.36102e+07	2.00417e+07	1.93465e+07	2.17243e+07					1.1437	0.995383	0.844939	0.815629	0.915873
NV2t007989001.1		4	6.69798	7.50408e+07	6.23348e+07	5.87372e+07	2.62751e+07	3.17526e+07	3.06403e+07	2.51175e+07	2.50054e+07	2.75011e+07					0.788547	0.760924	0.62377	0.620986	0.682966
NV2t007994001.1		2	6.31708	1.26287e+07	1.66038e+07	1.49887e+07	1.52567e+07	1.04762e+07	1.10384e+07	1.51635e+07	1.67854e+07	1.76477e+07					0.722004	0.760748	1.04504	1.15683	1.21625
NV2t007995001.1		8	7.05525	1.18826e+08	1.45012e+08	1.37082e+08	6.39188e+07	5.79643e+07	6.80093e+07	1.21832e+08	1.10018e+08	9.91962e+07					0.565898	0.663966	1.18944	1.0741	0.96844
NV2t007999001.1		8	7.01737	1.32169e+08	1.75921e+08	1.50652e+08	7.69754e+07	6.74403e+07	9.32686e+07	8.96955e+07	7.68673e+07	6.49057e+07					0.654128	0.904647	0.86999	0.745565	0.629545
NV2t008000001.1	PAN/Apple domain-containing protein-3
NV2t008006001.1		5	6.98325	3.1593e+07	3.26209e+07	3.06289e+07	1.78622e+07	1.63103e+07	1.7049e+07	1.77975e+07	1.88649e+07	1.92218e+07					0.72688	0.759801	0.793161	0.84073	0.856637
NV2t008009001.1		6	6.90212	1.00922e+08	8.53536e+07	7.43444e+07	1.04154e+08	1.07502e+08	1.0704e+08	7.58544e+07	8.68416e+07	1.00135e+08					1.14887	1.14394	0.810655	0.928075	1.07014
NV2t008011001.1		3	5.88729	8.23073e+06	9.1949e+06	7.41882e+06	1.39221e+07	1.15529e+07	1.35671e+07	2.33668e+07	2.51903e+07	2.65864e+07					0.747865	0.878256	1.51263	1.63067	1.72105
NV2t008017001.1		2	5.85892	1.45839e+07	1.51271e+07	1.8442e+07	1.7887e+07	2.90347e+07	1.91332e+07	1.67397e+07	9.93599e+06	1.2368e+07					1.70512	1.12363	0.98307	0.583511	0.726338
NV2t008019001.1		3	6.54103	3.54986e+07	3.73112e+07	3.35478e+07	2.80265e+07	2.28383e+07	1.9872e+07	1.88989e+07	2.20515e+07	2.8187e+07					0.834762	0.72634	0.69077	0.806003	1.03026
NV2t008024004.1		81	8.8619	6.48845e+09	5.94742e+09	6.04816e+09	2.87378e+09	2.37407e+09	3.0461e+09	1.02369e+10	1.35104e+10	1.03547e+10					0.350964	0.450311	1.51334	1.99727	1.53075
NV2t008024013.1		2	6.18378	9.68691e+06	9.4076e+06	1.08212e+07	2.60112e+07	1.93143e+07	1.89123e+07	4.01431e+07	5.56319e+07	4.93942e+07					0.726337	0.71122	1.50962	2.0921	1.85753
NV2t008027002.1	Astacin-like metalloprotease-2	3	6.88903	4.80529e+07	4.69912e+07	4.34936e+07	1.25745e+07	1.33902e+07	2.11955e+07	2.32441e+07	2.23073e+07	1.52262e+07					0.488939	0.77395	0.848753	0.814545	0.555983
NV2t008031001.1		8	6.70423	7.25255e+07	6.72471e+07	1.04087e+08	5.72931e+07	6.49552e+07	5.62901e+07	6.65642e+07	6.32809e+07	4.71786e+07					0.975269	0.845166	0.999426	0.950129	0.708362
NV2t008032001.1		5	6.40849	6.72317e+07	6.21604e+07	7.83945e+07	1.22576e+07	1.61402e+07	1.81302e+07	1.74651e+07	1.43368e+07	1.01204e+07					0.490358	0.550816	0.530609	0.435567	0.30747
NV2t008037001.1		15	8.30859	6.32644e+08	7.09277e+08	1.08544e+09	2.74969e+08	2.66261e+08	2.10148e+08	3.03244e+08	2.7915e+08	2.31123e+08					0.60025	0.473749	0.683622	0.629306	0.521035
NV2t008042001.1		3	6.49454	3.34466e+07	2.87509e+07	3.13057e+07	3.59382e+07	3.58353e+07	2.85476e+07	2.80323e+07	3.26836e+07	3.76802e+07					1.10368	0.879228	0.863358	1.00661	1.1605
NV2t008044001.1		3	6.06748	2.49815e+07	2.75997e+07	2.91023e+07	1.95109e+07	2.01985e+07	1.72547e+07	2.9014e+07	2.53516e+07	2.81454e+07					0.821975	0.702177	1.18072	1.03168	1.14537
NV2t008088002.1		5	6.48332	3.08305e+07	3.73209e+07	3.16271e+07	5.47099e+07	4.66286e+07	4.88222e+07	4.21794e+07	4.08571e+07	4.60478e+07					1.10721	1.15929	1.00156	0.970161	1.09342
NV2t008091001.1		15	6.92119	3.06013e+08	3.32322e+08	2.91525e+08	1.61561e+08	1.69994e+08	2.01164e+08	2.02169e+08	1.76817e+08	1.70335e+08					0.760447	0.899882	0.904377	0.790971	0.761974
NV2t008096001.1	Thrombospondin type laminin G domain and EAR repeats (TSPEAR)	8	6.92937	1.68291e+08	1.58461e+08	1.86848e+08	1.06212e+08	9.67562e+07	1.04975e+08	8.88211e+07	1.03484e+08	8.08937e+07					0.795443	0.86301	0.730208	0.850755	0.665036
NV2t008096002.1		8	6.92937	1.68291e+08	1.58461e+08	1.86848e+08	1.06212e+08	9.67562e+07	1.04975e+08	8.88211e+07	1.03484e+08	8.08937e+07					0.795443	0.86301	0.730208	0.850755	0.665036
NV2t008108001.1		2	7.02905	3.51816e+06	1.99354e+06	3.45578e+06	5.99426e+08	9.49602e+08	3.11355e+08	1.14793e+08	1.27799e+08	2.24856e+08					3.65732	1.19916	0.442117	0.492207	0.866015
NV2t008119001.1		6	7.40402	4.6135e+08	3.75896e+08	4.23565e+08	6.9581e+07	7.12482e+07	8.32916e+07	8.13874e+07	9.74905e+07	7.40109e+07					0.368987	0.431359	0.421497	0.504893	0.383295
NV2t008124001.1		14	7.16305	4.08779e+08	4.4654e+08	4.10205e+08	1.52682e+08	1.33131e+08	1.56493e+08	1.38256e+08	1.45061e+08	1.3434e+08					0.563719	0.662641	0.585422	0.614233	0.568841
NV2t008125001.1		3	6.57985	2.31895e+08	2.33294e+08	1.56841e+08	1.46665e+07	1.92504e+07	3.42357e+07	2.12552e+07	1.60866e+07	1.3455e+07					0.233817	0.41583	0.258167	0.195389	0.163425
NV2t008126001.1		2	6.47407	2.1128e+07	1.94603e+07	1.95857e+07	1.35714e+07	1.19876e+07	1.25426e+07	8.43374e+06	1.03597e+07	9.83818e+06					0.850133	0.889495	0.598104	0.734689	0.697704
NV2t008136001.1		2	5.79872	1.00892e+07	8.728e+06	1.00467e+07	6.47105e+06	9.02543e+06	7.20177e+06	8.95207e+06	7.41479e+06	8.07297e+06					1.06877	0.852819	1.06009	0.878044	0.955984
NV2t008138002.1		2	6.05348	2.06887e+07	2.29243e+07	1.60613e+07	1.22083e+07	1.1321e+07	1.56186e+07	9.91737e+06	9.64559e+06	9.97932e+06					0.793749	1.09506	0.695335	0.676279	0.699678
NV2t008162001.1		4	6.58434	4.08554e+07	4.32973e+07	5.68882e+07	2.10998e+07	1.86946e+07	1.77672e+07	2.58183e+07	2.74793e+07	2.20066e+07					0.614264	0.583792	0.848335	0.902912	0.723092
NV2t008173002.1		5	5.8612	1.39286e+07	1.24132e+07	1.12859e+07	2.78685e+07	3.3038e+07	2.47082e+07	2.71498e+07	2.56814e+07	3.77703e+07					1.39046	1.03989	1.14265	1.08085	1.58963
NV2t008174001.1		3	6.67551	3.70277e+07	3.6976e+07	4.86186e+07	7.26732e+07	8.02351e+07	4.43307e+07	3.21939e+07	2.91821e+07	4.01705e+07					1.71358	0.94677	0.687565	0.623241	0.85792
NV2t008176002.1		3	6.37066	2.26509e+07	3.0554e+07	2.15231e+07	6.36949e+07	4.11147e+07	6.79415e+07	1.55126e+08	1.78048e+08	1.52959e+08					0.504398	0.833511	1.9031	2.1843	1.87651
NV2t008258002.1	vWFA and ShKT domain-containing protein-1
NV2t008259001.1	vWFA domain-containing glycine and glutamine-rich protein
NV2t008260001.1	vWFA and ShKT domain-containing protein-2
NV2t008264001.1		3	6.16731	1.57342e+07	1.98904e+07	2.56954e+07	1.09234e+07	1.06205e+07	6.93617e+06	1.40544e+07	1.14275e+07	1.3545e+07					0.741959	0.484569	0.981857	0.798341	0.946267
NV2t008267003.1		15	6.80348	9.47025e+07	1.14194e+08	1.07321e+08	1.00556e+08	8.67669e+07	1.08945e+08	1.41417e+08	1.35831e+08	1.15111e+08					0.777137	0.975779	1.26662	1.21658	1.03101
NV2t008267006.1		11	6.74608	1.50623e+08	1.80757e+08	1.76469e+08	7.21651e+07	5.64306e+07	7.96524e+07	1.36083e+08	1.44923e+08	1.0517e+08					0.460752	0.650357	1.11111	1.18329	0.85871
NV2t008267007.1		72	7.44455	1.29826e+09	1.51458e+09	1.38238e+09	7.90117e+08	6.46841e+08	8.48198e+08	1.10899e+09	1.16042e+09	9.69602e+08					0.598966	0.785419	1.0269	1.07453	0.897837
NV2t008273001.1		6	7.08682	1.67813e+08	1.59537e+08	1.72632e+08	1.38132e+08	1.7809e+08	1.32019e+08	1.40108e+08	1.14237e+08	1.42418e+08					1.19169	0.883406	0.937539	0.764421	0.952994
NV2t008276001.1	CTLD protein-6
NV2t008278001.1	CTLD protein-7
NV2t008280001.1		8	6.67366	1.12995e+08	1.15915e+08	1.24785e+08	3.71402e+07	3.80623e+07	4.72916e+07	3.57088e+07	3.39444e+07	2.53789e+07					0.599699	0.745113	0.562617	0.534819	0.399863
NV2t008283002.1		8	8.37838	7.93185e+08	8.64418e+08	6.18646e+08	1.07967e+08	1.18597e+08	2.2115e+08	3.12166e+08	2.60604e+08	1.95282e+08					0.30566	0.569971	0.804549	0.671656	0.503302
NV2t008285001.1		6	6.66845	4.75521e+07	2.84591e+07	3.38338e+07	2.2352e+09	2.61837e+09	2.74045e+09	2.22628e+08	3.17351e+08	2.55055e+08					2.77275	2.90203	0.235755	0.336063	0.270093
NV2t008293001.1		3	6.48981	3.58318e+07	3.15297e+07	4.59794e+07	1.1843e+08	1.43379e+08	9.32027e+07	1.47287e+08	1.3817e+08	1.45761e+08					1.43448	0.932473	1.47357	1.38236	1.4583
NV2t008295001.1		7	7.16557	8.73689e+07	1.13179e+08	9.7797e+07	6.77432e+07	5.91945e+07	6.38081e+07	4.794e+07	4.23252e+07	4.5442e+07					0.852677	0.919134	0.690559	0.60968	0.654577
NV2t008296001.1		11	7.27771	2.67233e+08	2.76406e+08	2.35174e+08	9.49032e+07	8.53592e+07	1.80255e+08	2.00174e+08	2.15034e+08	1.19685e+08					0.458859	0.968985	1.07606	1.15594	0.643381
NV2t008297001.1		25	7.43161	6.09793e+08	4.86063e+08	5.25272e+08	3.35654e+08	3.39386e+08	4.18891e+08	4.37401e+08	5.42367e+08	4.06637e+08					0.744727	0.919189	0.959805	1.19014	0.892299
NV2t008299001.1		53	7.85817	1.33694e+09	1.22692e+09	1.23176e+09	6.68956e+08	7.07038e+08	9.41642e+08	1.03368e+09	1.06503e+09	7.96568e+08					0.706369	0.940751	1.0327	1.06402	0.795814
NV2t008301001.1		3	5.98497	1.74694e+07	1.82208e+07	1.65741e+07	3.64486e+07	3.95548e+07	3.23693e+07	2.16955e+07	1.91553e+07	2.57339e+07					1.56672	1.28211	0.859336	0.75872	1.01929
NV2t008305001.1		13	6.4461	9.64169e+07	1.07017e+08	8.7658e+07	9.71432e+07	9.56054e+07	1.16552e+08	1.10838e+08	1.01402e+08	1.01551e+08					0.941221	1.14743	1.09119	0.998287	0.999755
NV2t008308001.1		4	6.61944	2.79289e+07	3.24164e+07	2.159e+07	6.00885e+07	6.04444e+07	5.59923e+07	4.07718e+07	3.48988e+07	5.6567e+07					1.39238	1.28982	0.939207	0.803918	1.30306
NV2t008310001.1		8	7.55448	9.46178e+07	1.02981e+08	1.06898e+08	1.49892e+08	1.44795e+08	1.39506e+08	1.48206e+08	1.40874e+08	1.40862e+08					1.11511	1.07438	1.14138	1.08491	1.08482
NV2t008311004.1		8	6.61317	5.99761e+07	6.75474e+07	5.43068e+07	6.61255e+07	5.83027e+07	5.93199e+07	5.25595e+07	5.28965e+07	6.4667e+07					0.979508	0.996599	0.883021	0.888683	1.08643
NV2t008317001.1		3	5.85314	8.17907e+06	6.95799e+06	5.42468e+06	2.00131e+07	1.61153e+07	1.48125e+07	4.22267e+07	6.16041e+07	8.59692e+07					0.555056	0.510183	1.45441	2.12182	2.96102
NV2t008325001.1		5	6.52293	5.20196e+07	6.02184e+07	3.2164e+07	3.92395e+07	3.56034e+07	5.62518e+07	4.47832e+07	4.26099e+07	5.04938e+07					0.775142	1.22469	0.974999	0.927682	1.09933
NV2t008332001.1		10	6.64168	8.52789e+07	8.23508e+07	7.63169e+07	1.32699e+08	1.35993e+08	1.35474e+08	7.23253e+07	7.30366e+07	7.91154e+07					1.40265	1.3973	0.745972	0.753308	0.816006
NV2t008333001.1		7	6.65979	1.13833e+08	1.45419e+08	1.10683e+08	1.04513e+08	8.44685e+07	1.68122e+08	8.90934e+07	8.62376e+07	5.69274e+07					0.792473	1.5773	0.835863	0.809071	0.534085
NV2t008338001.1		2	6.78751	1.25535e+07	1.02416e+07	8.63623e+06	2.66045e+07	3.00348e+07	2.61265e+07	2.1439e+07	2.32625e+07	3.17146e+07					1.41812	1.23359	1.01226	1.09836	1.49744
NV2t008339001.1		13	6.79367	1.71226e+08	1.7166e+08	1.92288e+08	1.06584e+08	1.06005e+08	1.06794e+08	6.95311e+07	6.96904e+07	6.17566e+07					0.903848	0.910573	0.592855	0.594213	0.526566
NV2t008343004.1		3	6.09151	3.39347e+07	2.4821e+07	2.12397e+07	1.44085e+07	1.96914e+07	2.36155e+07	1.41412e+07	1.41377e+07	1.37766e+07					0.985849	1.18231	0.707982	0.707805	0.689727
NV2t008344002.1		3	5.9855	1.40411e+07	1.67406e+07	2.37543e+07	7.28593e+06	5.40656e+06	6.91046e+06	6.03051e+06	6.81202e+06	3.75604e+06					0.536261	0.68543	0.598149	0.675665	0.372551
NV2t008346001.1		2	6.7032	2.73854e+07	3.23474e+07	3.25903e+07	1.84461e+07	1.37826e+07	1.53257e+07	1.3214e+07	1.49628e+07	1.33564e+07					0.683773	0.760326	0.655563	0.742323	0.662627
NV2t008347001.1	Cadherin EGF LAG seven-pass G-type receptor-like-2
NV2t008351001.1		12	7.03761	1.50087e+08	1.21429e+08	1.46346e+08	1.86277e+08	2.36604e+08	1.72244e+08	1.6625e+08	1.61675e+08	1.8428e+08					1.39618	1.01639	0.981024	0.954028	1.08742
NV2t008353001.1		6	6.49386	3.53689e+07	3.01213e+07	3.88294e+07	9.89169e+07	1.53301e+08	6.94761e+07	2.96082e+08	2.24188e+08	3.83749e+08					1.03735	0.470127	2.00351	1.51702	2.59674
NV2t008354001.1		13	6.31523	7.53395e+07	8.96665e+07	7.95318e+07	1.14278e+08	9.71551e+07	1.02903e+08	1.35116e+08	1.33452e+08	1.42057e+08					0.901905	0.955266	1.25431	1.23885	1.31874
NV2t008356001.1		10	7.34749	1.63119e+08	1.6465e+08	1.55168e+08	1.87606e+08	1.85996e+08	1.4023e+08	2.23416e+08	2.23113e+08	3.14021e+08					0.952567	0.718181	1.14421	1.14266	1.60824
NV2t008360001.1		10	6.83018	1.55992e+08	1.29263e+08	1.8333e+08	9.71403e+07	1.16434e+08	7.73806e+07	7.3507e+07	7.3961e+07	7.84698e+07					1.06335	0.706688	0.671312	0.675458	0.716636
NV2t008362001.1		6	6.44163	7.4709e+07	4.95039e+07	7.76539e+07	5.86518e+07	8.24572e+07	6.33635e+07	6.40825e+07	6.87466e+07	5.70335e+07					1.24474	0.956507	0.967361	1.03777	0.860952
NV2t008363001.1		7	6.89832	7.70488e+07	7.79973e+07	7.29823e+07	3.40515e+07	2.97559e+07	4.00002e+07	6.30049e+07	7.11787e+07	5.65896e+07					0.512434	0.688854	1.08503	1.22579	0.974546
NV2t008364001.1		2	6.90534	7.8511e+06	8.42344e+06	7.49048e+06	1.32625e+07	1.06571e+07	1.13988e+07	1.12826e+07	1.30786e+07	1.3751e+07					0.986815	1.05549	1.04473	1.21103	1.2733
NV2t008367001.1		2	7.56805	3.17125e+07	2.86352e+07	2.8905e+07	1.04949e+08	1.39402e+08	9.47915e+07	6.79847e+07	5.66472e+07	8.25313e+07					1.97404	1.34232	0.962716	0.802168	1.16871
NV2t008369001.1		3	6.21634	1.81057e+07	2.15168e+07	1.86592e+07	4.8892e+07	3.07622e+07	4.08074e+07	2.58632e+07	3.45675e+07	3.005e+07					1.02836	1.36417	0.864592	1.15557	1.00455
NV2t008373001.1		10	6.22868	6.14116e+07	5.81933e+07	4.7874e+07	1.01381e+08	1e+08	1.11322e+08	1.15449e+08	1.23438e+08	1.3479e+08					1.05404	1.17338	1.21688	1.30109	1.42073
NV2t008374004.1		4	6.50878	6.17042e+07	6.10968e+07	8.68598e+07	4.66558e+07	6.88118e+07	2.94971e+07	4.29377e+07	2.93835e+07	4.8217e+07					1.30335	0.5587	0.813276	0.556549	0.913271
NV2t008375002.1	Matrix metalloprotease-1	6	7.52608	1.427e+08	2.44898e+08	1.69279e+08	7.93419e+07	6.03183e+07	1.07025e+08	1.99048e+08	1.52467e+08	1.24319e+08					0.424314	0.752872	1.40022	1.07254	0.874528
NV2t008383001.1		9	6.78823	9.99747e+07	8.57402e+07	8.36476e+07	1.22924e+08	1.68027e+08	1.40345e+08	6.72515e+07	5.73314e+07	7.03587e+07					1.68852	1.41035	0.675818	0.57613	0.707043
NV2t008387001.1		3	5.69628	1.49556e+07	1.67484e+07	1.11499e+07	1.28864e+07	7.5764e+06	1.56936e+07	1.54856e+07	2.35046e+07	1.70455e+07					0.504921	1.04588	1.03202	1.56644	1.13598
NV2t008390001.1		6	6.22146	5.58419e+07	5.05133e+07	4.98213e+07	6.05133e+07	5.94999e+07	5.74318e+07	4.62901e+07	5.20119e+07	5.46349e+07					1.10059	1.06233	0.856241	0.962078	1.0106
NV2t008393003.1	Spongin-like-3
NV2t008394001.1		8	7.70008	2.3467e+08	2.73467e+08	2.45665e+08	7.67415e+07	6.65176e+07	7.70161e+07	1.13831e+08	1.12625e+08	1.08284e+08					0.457404	0.529596	0.782754	0.774458	0.744609
NV2t008396001.1		7	7.86934	2.66857e+08	2.58004e+08	1.97542e+08	5.9209e+07	7.06456e+07	8.43594e+07	8.38146e+07	7.26106e+07	7.94202e+07					0.542286	0.647556	0.643373	0.55737	0.609641
NV2t008397001.1		2	6.50435	8.90248e+06	8.81963e+06	8.11737e+06	1.50444e+07	1.55639e+07	1.25541e+07	1.27534e+07	1.24356e+07	1.67514e+07					1.2626	1.01843	1.0346	1.00882	1.35893
NV2t008406003.1	Anthrax toxin receptor 1-like-3	10	7.22559	5.55486e+07	5.85364e+07	9.49989e+07	4.65431e+08	6.19376e+08	2.04662e+08	1.56927e+09	1.11834e+09	2.0855e+09					0.888821	0.293695	2.25195	1.60484	2.99275
NV2t008407001.1		2	5.91357	1.00247e+07	8.94298e+06	9.21248e+06	1.5946e+07	2.37632e+07	2.10902e+07	1.24664e+07	9.37138e+06	1.02505e+07					1.76652	1.56781	0.926733	0.696654	0.762009
NV2t008413001.1	vWFA domain-containing protein-7
NV2t008423001.1		2	6.48862	8.73307e+06	9.90313e+06	1.17465e+07	1.28195e+07	8.09223e+06	9.73082e+06	1.09119e+07	1.52343e+07	1.06812e+07					0.744283	0.894993	1.00362	1.40118	0.982401
NV2t008429001.1		7	6.23607	3.59983e+07	3.39188e+07	3.64959e+07	3.27902e+07	2.22417e+07	2.58029e+07	1.90069e+07	2.97204e+07	2.38102e+07					0.770541	0.893915	0.658476	1.02963	0.824881
NV2t008430001.1		9	7.03952	1.30909e+08	1.8609e+08	1.40128e+08	8.64613e+07	6.39079e+07	1.13262e+08	6.38078e+08	6.06895e+08	4.54771e+08					0.237625	0.421135	2.37253	2.25658	1.69095
NV2t008435001.1		8	6.74791	1.19254e+08	1.07591e+08	1.44879e+08	5.36909e+07	5.53573e+07	5.23463e+07	5.62867e+07	6.04719e+07	4.74924e+07					0.714421	0.675563	0.726416	0.780429	0.612921
NV2t008436001.1		3	6.39861	3.28979e+07	3.24986e+07	3.46177e+07	2.88734e+07	2.86238e+07	3.28145e+07	2.95465e+07	3.01512e+07	2.46915e+07					0.937752	1.07504	0.96798	0.987791	0.808923
NV2t008437001.1		2	6.64799	1.8153e+07	2.73782e+07	2.54705e+07	1.54868e+07	1.34823e+07	5.68223e+06	7.23021e+07	5.50323e+07	1.4036e+08					0.325007	0.136977	1.74293	1.32662	3.38355
NV2t008439005.1		8	6.73811	1.33202e+08	1.37355e+08	1.36331e+08	1.07014e+08	9.88036e+07	1.11608e+08	5.82129e+07	6.11059e+07	5.45034e+07					0.990086	1.1184	0.583337	0.612327	0.546165
NV2t008447001.1		3	6.37565	8.48414e+06	8.88045e+06	9.22908e+06	2.52788e+07	2.59993e+07	2.34131e+07	6.65446e+07	6.17743e+07	6.60083e+07					0.791555	0.71282	2.02597	1.88074	2.00964
NV2t008455002.1		12	7.04687	2.04735e+08	1.86773e+08	2.1916e+08	1.58171e+08	1.70151e+08	1.47146e+08	2.2907e+08	2.33273e+08	2.29888e+08					0.861103	0.74468	1.15928	1.18055	1.16342
NV2t008456001.1		21	8.13902	7.83118e+08	7.67988e+08	8.64663e+08	4.25923e+08	3.56355e+08	3.91441e+08	4.76582e+08	5.80477e+08	4.69377e+08					0.626904	0.688629	0.83841	1.02118	0.825734
NV2t008458001.1		7	6.86019	1.11433e+08	1.02397e+08	9.92801e+07	3.66797e+07	4.54538e+07	8.14269e+07	3.55803e+07	3.12262e+07	1.79787e+07					0.728614	1.30525	0.570343	0.500549	0.288195
NV2t008459001.1		4	6.62544	3.25079e+07	2.9601e+07	2.8459e+07	4.79266e+07	6.87126e+07	6.38879e+07	9.83197e+07	7.52644e+07	8.41991e+07					1.16929	1.08719	1.67312	1.28079	1.43283
[truncated: 3,675 more rows]
