# Supplementary material for: Molecular dynamics of the matrisome across sea anemone life history
Source: eLife. 2025 Oct 23;14:RP105319. doi: 10.7554/eLife.105319 (PMC12549020; doi:10.7554/eLife.105319)
Supplement: Supplementary file 4. — pSC, putative germ cell, PGC, primary germ cell, NPC, neuroglandular progenitor cell. GD, digestive gland cell, NGD, digestive neuroglandular cell. Related to Figure 2. [file elife-105319-supp4.xlsx]

## Sheet: MatrisomeExpression.cellstates
Supplementary file 4. Gene expression profiles indicating the average expression (avg.exp), the percentage of the cells with gene expression (pct.exp), and the relative expression levels (avg.exp.scaled) for all ECM genes across all cell state identities (cell.state.id) in Cole et al. 2024, Frontiers in Zoology. pSC, putative germ cell, PGC, primary germ cell, NPC, neuroglandular progenitor cell.…
gene	avg.exp	pct.exp	avg.exp.scaled	cell.state.id
EGF-triLpxA : NV2.12181	0.00385825	0.531108	-0.0513027	pSC.PGC.Mitotic.1
EGF-triLpxA : NV2.12181	0.00222907	0.33557	-0.152295	pSC.PGC.Mitotic.2
EGF-triLpxA : NV2.12181	0	0	-0.290474	pSC.PGC.NPC
EGF-triLpxA : NV2.12181	0.0022521	0.253165	-0.150867	pSC.PGC.NPC.g
EGF-triLpxA : NV2.12181	0	0	-0.290474	pSC.PGC.PGC
EGF-triLpxA : NV2.12181	0	0	-0.290474	pSC.PGC.primary.oocyte
EGF-triLpxA : NV2.12181	0.0995328	3.4749	2.5	pSC.PGC.spermatagonia
EGF-triLpxA : NV2.12181	0	0	-0.290474	pSC.PGC.maturing.sperm
EGF-triLpxA : NV2.12181	0.0144523	0.458716	0.605417	pSC.PGC.maturing.sperm.2
EGF-triLpxA : NV2.12181	0	0	-0.290474	neurogland.all.S1.L1
EGF-triLpxA : NV2.12181	0	0	-0.290474	neurogland.all.N1.L1
EGF-triLpxA : NV2.12181	0	0	-0.290474	neurogland.all.N1.L2
EGF-triLpxA : NV2.12181	0.00292263	0.52356	-0.109301	neurogland.all.N1.L3
EGF-triLpxA : NV2.12181	0	0	-0.290474	neurogland.all.N1.g.early
EGF-triLpxA : NV2.12181	0	0	-0.290474	neurogland.all.N1.g1
EGF-triLpxA : NV2.12181	0	0	-0.290474	neurogland.all.N1.g2
EGF-triLpxA : NV2.12181	0	0	-0.290474	neurogland.all.N1.g3
EGF-triLpxA : NV2.12181	0	0	-0.290474	neurogland.all.N1.g4
EGF-triLpxA : NV2.12181	0	0	-0.290474	neurogland.all.N1.g5
EGF-triLpxA : NV2.12181	0	0	-0.290474	neurogland.all.N1.early.1
EGF-triLpxA : NV2.12181	0	0	-0.290474	neurogland.all.N1.early.2
EGF-triLpxA : NV2.12181	0	0	-0.290474	neurogland.all.N1.1
EGF-triLpxA : NV2.12181	0	0	-0.290474	neurogland.all.N1.2
EGF-triLpxA : NV2.12181	0	0	-0.290474	neurogland.all.N1.3
EGF-triLpxA : NV2.12181	0	0	-0.290474	neurogland.all.N1.4
EGF-triLpxA : NV2.12181	0	0	-0.290474	neurogland.all.N1.5
EGF-triLpxA : NV2.12181	0	0	-0.290474	neurogland.all.N1.6
EGF-triLpxA : NV2.12181	0	0	-0.290474	neurogland.all.N1S.1
EGF-triLpxA : NV2.12181	0	0	-0.290474	neurogland.all.N1S.2
EGF-triLpxA : NV2.12181	0	0	-0.290474	neurogland.all.N1S.3
EGF-triLpxA : NV2.12181	0	0	-0.290474	neurogland.all.N1S.4.early
EGF-triLpxA : NV2.12181	0	0	-0.290474	neurogland.all.N1S.4
EGF-triLpxA : NV2.12181	0	0	-0.290474	neurogland.all.NGD.early
EGF-triLpxA : NV2.12181	0	0	-0.290474	neurogland.all.NGD.1
EGF-triLpxA : NV2.12181	0	0	-0.290474	neurogland.all.SGD.early
EGF-triLpxA : NV2.12181	0	0	-0.290474	neurogland.all.S1.1
EGF-triLpxA : NV2.12181	0	0	-0.290474	neurogland.all.S1.2
EGF-triLpxA : NV2.12181	0	0	-0.290474	neurogland.all.S2.tll.1
EGF-triLpxA : NV2.12181	0	0	-0.290474	neurogland.all.S2.tll.2
EGF-triLpxA : NV2.12181	0	0	-0.290474	neurogland.all.S2.tll.3
EGF-triLpxA : NV2.12181	0	0	-0.290474	neurogland.all.S2.tll.4
EGF-triLpxA : NV2.12181	0	0	-0.290474	neurogland.all.GD.1
EGF-triLpxA : NV2.12181	0	0	-0.290474	neurogland.all.GD.2
EGF-triLpxA : NV2.12181	0	0	-0.290474	neurogland.all.GD.3
EGF-triLpxA : NV2.12181	0.0016904	0.49505	-0.185687	neurogland.all.GD.4
EGF-triLpxA : NV2.12181	0	0	-0.290474	neurogland.all.GD.5
EGF-triLpxA : NV2.12181	0	0	-0.290474	neurogland.all.S3
EGF-triLpxA : NV2.12181	0	0	-0.290474	neurogland.all.N2.g1
EGF-triLpxA : NV2.12181	0	0	-0.290474	neurogland.all.N2.1
EGF-triLpxA : NV2.12181	0	0	-0.290474	neurogland.all.N2.2
EGF-triLpxA : NV2.12181	0	0	-0.290474	neurogland.all.N2.3
EGF-triLpxA : NV2.12181	0	0	-0.290474	neurogland.all.N2.4
EGF-triLpxA : NV2.12181	0	0	-0.290474	neurogland.all.N2.5
EGF-triLpxA : NV2.12181	0	0	-0.290474	neurogland.all.N2.6
EGF-triLpxA : NV2.12181	0	0	-0.290474	neurogland.all.N2.7
EGF-triLpxA : NV2.12181	0	0	-0.290474	neurogland.all.immune
EGF-triLpxA : NV2.12181	0.000480123	0.139082	-0.260711	gland.mucous.1.dev.aboral
EGF-triLpxA : NV2.12181	0	0	-0.290474	gland.mucous.2.dev
EGF-triLpxA : NV2.12181	0	0	-0.290474	gland.mucous.3.dev
EGF-triLpxA : NV2.12181	0	0	-0.290474	gland.mucous.4.dev
EGF-triLpxA : NV2.12181	0.00562301	0.207039	0.0580941	gland.mucous.5.adult
EGF-triLpxA : NV2.12181	0	0	-0.290474	gland.mucous.6.adult
EGF-triLpxA : NV2.12181	0	0	-0.290474	gland.mucous.7.adult
EGF-triLpxA : NV2.12181	0	0	-0.290474	unchar.immune.1.early.gastrula
EGF-triLpxA : NV2.12181	0.00198102	0.243309	-0.167671	unchar.immune.2.mid.gastrula
EGF-triLpxA : NV2.12181	0	0	-0.290474	unchar.immune.3.planula
EGF-triLpxA : NV2.12181	0.00770654	0.38961	0.187251	unchar.immune.4.mature
EGF-triLpxA : NV2.12181	0.00257937	0.194175	-0.13058	cnidocyte.pSC
EGF-triLpxA : NV2.12181	0.00596589	0.407609	0.0793489	cnidocyte.gast.1
EGF-triLpxA : NV2.12181	0	0	-0.290474	cnidocyte.nem.2
EGF-triLpxA : NV2.12181	0.000353945	0.120773	-0.268533	cnidocyte.early
EGF-triLpxA : NV2.12181	0	0	-0.290474	cnidocyte.nep.8
EGF-triLpxA : NV2.12181	0	0	-0.290474	cnidocyte.planula.spir
EGF-triLpxA : NV2.12181	0	0	-0.290474	cnidocyte.spirocyte
EGF-triLpxA : NV2.12181	0	0	-0.290474	cnidocyte.planula.nem
EGF-triLpxA : NV2.12181	0	0	-0.290474	cnidocyte.spirocyte.maturing
EGF-triLpxA : NV2.12181	0.00208683	0.229885	-0.161112	cnidocyte.maturing.1
EGF-triLpxA : NV2.12181	0	0	-0.290474	cnidocyte.planula.mat
EGF-triLpxA : NV2.12181	0	0	-0.290474	cnidocyte.nem.1
EGF-triLpxA : NV2.12181	0	0	-0.290474	cnidocyte.mature
EGF-triLpxA : NV2.12181	0	0	-0.290474	retractor muscle.RM.1
EGF-triLpxA : NV2.12181	0	0	-0.290474	retractor muscle.TR.2
EGF-triLpxA : NV2.12181	0	0	-0.290474	retractor muscle.TR.1
EGF-triLpxA : NV2.12181	0	0	-0.290474	retractor muscle.MR.1
EGF-triLpxA : NV2.12181	0.118323	18.8161	2.5	all.gastrodermis.gastrula.1
EGF-triLpxA : NV2.12181	0.045401	0.788644	2.5	all.gastrodermis.gastrula.2
EGF-triLpxA : NV2.12181	0.0328492	6.79406	1.74584	all.gastrodermis.gastrula.3
EGF-triLpxA : NV2.12181	0.0337491	0.428266	1.80161	all.gastrodermis.early.1
EGF-triLpxA : NV2.12181	0.0116857	2.19124	0.433917	all.gastrodermis.early.2
EGF-triLpxA : NV2.12181	0.00793958	0.0798722	0.201697	all.gastrodermis.CM
EGF-triLpxA : NV2.12181	0.0193121	0.428571	0.906673	all.gastrodermis.MR/PM
EGF-triLpxA : NV2.12181	0.0068078	0.227101	0.131538	all.gastrodermis.gastrodermis
EGF-triLpxA : NV2.12181	0.00519781	0.240192	0.0317358	all.gastrodermis.pharyngeal
EGF-triLpxA : NV2.12181	0	0	-0.290474	all.gastrodermis.ImM
EGF-triLpxA : NV2.12181	0.0319753	0.877193	1.69166	all.gastrodermis.non-muscle
EGF-triLpxA : NV2.12181	0.0126022	0.323625	0.490731	all.gastrodermis.mesentery
EGF-triLpxA : NV2.12181	0	0	-0.290474	all.gastrodermis.neuron
EGF-triLpxA : NV2.12181	0	0	-0.290474	all.gastrodermis.immune
EGF-triLpxA : NV2.12181	0.0181265	1.95122	0.833179	all.gastrodermis.gland
EGF-triLpxA : NV2.12181	0	0	-0.290474	all.gastrodermis.ciliated
EGF-triLpxA : NV2.12181	0	0	-0.290474	all.ectoderm.apical organ
EGF-triLpxA : NV2.12181	0.00293116	0.193009	-0.108773	all.ectoderm.early.ect.1
EGF-triLpxA : NV2.12181	0.00329575	0.149663	-0.086172	all.ectoderm.early.ect.2
EGF-triLpxA : NV2.12181	0.00215888	0.0402414	-0.156646	all.ectoderm.early.ect.2b
EGF-triLpxA : NV2.12181	0.00131847	0.423012	-0.208743	all.ectoderm.lip
EGF-triLpxA : NV2.12181	0.00303072	0.12766	-0.102601	all.ectoderm.pharyng.
EGF-triLpxA : NV2.12181	0.00399638	0.0890585	-0.0427402	all.ectoderm.epith.1
EGF-triLpxA : NV2.12181	0.000605785	0.054603	-0.252922	all.ectoderm.epith.2
EGF-triLpxA : NV2.12181	0.000423624	0.0382702	-0.264214	all.ectoderm.epith.3
EGF-triLpxA : NV2.12181	0	0	-0.290474	all.ectoderm.epith.4
NvADAM-1 : NV2.24729	0.634285	42.6404	2.5	pSC.PGC.Mitotic.1
NvADAM-1 : NV2.24729	0.688722	48.6577	2.5	pSC.PGC.Mitotic.2
NvADAM-1 : NV2.24729	0.317193	23.0328	0.750686	pSC.PGC.NPC
NvADAM-1 : NV2.24729	0.160846	14.5148	-0.280653	pSC.PGC.NPC.g
NvADAM-1 : NV2.24729	0.0877658	8.69565	-0.762727	pSC.PGC.PGC
NvADAM-1 : NV2.24729	0.0500711	5.88235	-1.01138	pSC.PGC.primary.oocyte
NvADAM-1 : NV2.24729	0.0645573	3.0888	-0.915822	pSC.PGC.spermatagonia
NvADAM-1 : NV2.24729	0	0	-1.34167	pSC.PGC.maturing.sperm
NvADAM-1 : NV2.24729	0	0	-1.34167	pSC.PGC.maturing.sperm.2
NvADAM-1 : NV2.24729	0.246813	6.74157	0.28643	neurogland.all.S1.L1
NvADAM-1 : NV2.24729	0.133959	19.1489	-0.458013	neurogland.all.N1.L1
NvADAM-1 : NV2.24729	0.192598	19.1176	-0.0711998	neurogland.all.N1.L2
NvADAM-1 : NV2.24729	0.141109	9.42408	-0.41085	neurogland.all.N1.L3
NvADAM-1 : NV2.24729	0.152541	6.15385	-0.335439	neurogland.all.N1.g.early
NvADAM-1 : NV2.24729	0.219147	5	0.103931	neurogland.all.N1.g1
NvADAM-1 : NV2.24729	0.180613	3.94737	-0.15026	neurogland.all.N1.g2
NvADAM-1 : NV2.24729	0.174435	7.66284	-0.191017	neurogland.all.N1.g3
NvADAM-1 : NV2.24729	0.225084	6.52174	0.143089	neurogland.all.N1.g4
NvADAM-1 : NV2.24729	0.197257	5.26316	-0.0404707	neurogland.all.N1.g5
NvADAM-1 : NV2.24729	0.277681	7.8534	0.490045	neurogland.all.N1.early.1
NvADAM-1 : NV2.24729	0.141646	8.20189	-0.407307	neurogland.all.N1.early.2
NvADAM-1 : NV2.24729	0.226407	5.98007	0.151817	neurogland.all.N1.1
NvADAM-1 : NV2.24729	0.444694	8.18182	1.59175	neurogland.all.N1.2
NvADAM-1 : NV2.24729	0.245856	6.54206	0.280112	neurogland.all.N1.3
NvADAM-1 : NV2.24729	0.0979624	1.72414	-0.695466	neurogland.all.N1.4
NvADAM-1 : NV2.24729	0.243045	4.05405	0.261572	neurogland.all.N1.5
NvADAM-1 : NV2.24729	0.215906	10.0917	0.0825464	neurogland.all.N1.6
NvADAM-1 : NV2.24729	0.155041	6.66667	-0.31895	neurogland.all.N1S.1
NvADAM-1 : NV2.24729	0.213821	7.66129	0.0687964	neurogland.all.N1S.2
NvADAM-1 : NV2.24729	0.382862	8.69565	1.18387	neurogland.all.N1S.3
NvADAM-1 : NV2.24729	0.215753	20.5882	0.0815412	neurogland.all.N1S.4.early
NvADAM-1 : NV2.24729	0.190701	6.96517	-0.0837136	neurogland.all.N1S.4
NvADAM-1 : NV2.24729	0.184509	16.9231	-0.124558	neurogland.all.NGD.early
NvADAM-1 : NV2.24729	0.407014	9.80392	1.34319	neurogland.all.NGD.1
NvADAM-1 : NV2.24729	0.256554	20.5703	0.350685	neurogland.all.SGD.early
NvADAM-1 : NV2.24729	0.255084	8.4507	0.340986	neurogland.all.S1.1
NvADAM-1 : NV2.24729	0.149884	6.91244	-0.352966	neurogland.all.S1.2
NvADAM-1 : NV2.24729	0.0843674	4.34783	-0.785145	neurogland.all.S2.tll.1
NvADAM-1 : NV2.24729	0.0564819	4.86486	-0.969091	neurogland.all.S2.tll.2
NvADAM-1 : NV2.24729	0.0960045	5.6962	-0.708381	neurogland.all.S2.tll.3
NvADAM-1 : NV2.24729	0.26686	3.63636	0.418668	neurogland.all.S2.tll.4
NvADAM-1 : NV2.24729	0.0369206	6.59341	-1.09813	neurogland.all.GD.1
NvADAM-1 : NV2.24729	0.0492263	2.89855	-1.01695	neurogland.all.GD.2
NvADAM-1 : NV2.24729	0.0830298	5.88235	-0.793968	neurogland.all.GD.3
NvADAM-1 : NV2.24729	0.105045	4.9505	-0.648744	neurogland.all.GD.4
NvADAM-1 : NV2.24729	0.161986	9.52381	-0.273134	neurogland.all.GD.5
NvADAM-1 : NV2.24729	0.0530529	2.29008	-0.991711	neurogland.all.S3
NvADAM-1 : NV2.24729	0.454537	10.7383	1.65667	neurogland.all.N2.g1
NvADAM-1 : NV2.24729	0.114325	5.20833	-0.58753	neurogland.all.N2.1
NvADAM-1 : NV2.24729	0.171855	6.04027	-0.208032	neurogland.all.N2.2
NvADAM-1 : NV2.24729	0.262911	8.54701	0.392615	neurogland.all.N2.3
NvADAM-1 : NV2.24729	0.253781	8.60927	0.332391	neurogland.all.N2.4
NvADAM-1 : NV2.24729	0.155958	2.38095	-0.3129	neurogland.all.N2.5
NvADAM-1 : NV2.24729	0.183535	6.45161	-0.130983	neurogland.all.N2.6
NvADAM-1 : NV2.24729	0.0546759	1.78571	-0.981005	neurogland.all.N2.7
NvADAM-1 : NV2.24729	0.0530108	6.74603	-0.991989	neurogland.all.immune
NvADAM-1 : NV2.24729	0.15197	14.7427	-0.339203	gland.mucous.1.dev.aboral
NvADAM-1 : NV2.24729	0.148554	21.0938	-0.361738	gland.mucous.2.dev
NvADAM-1 : NV2.24729	0.100929	10.2719	-0.675896	gland.mucous.3.dev
NvADAM-1 : NV2.24729	0.0217354	0.925926	-1.1983	gland.mucous.4.dev
NvADAM-1 : NV2.24729	0.164268	9.52381	-0.25808	gland.mucous.5.adult
NvADAM-1 : NV2.24729	0.195982	8.39329	-0.0488795	gland.mucous.6.adult
NvADAM-1 : NV2.24729	0.123049	5.12821	-0.529984	gland.mucous.7.adult
NvADAM-1 : NV2.24729	0.921159	48.0569	2.5	unchar.immune.1.early.gastrula
NvADAM-1 : NV2.24729	0.280655	31.6302	0.509663	unchar.immune.2.mid.gastrula
NvADAM-1 : NV2.24729	0.294078	25.2446	0.598214	unchar.immune.3.planula
NvADAM-1 : NV2.24729	0.24133	10.9091	0.250258	unchar.immune.4.mature
NvADAM-1 : NV2.24729	0.154199	13.9806	-0.3245	cnidocyte.pSC
NvADAM-1 : NV2.24729	0.186183	13.3152	-0.113518	cnidocyte.gast.1
NvADAM-1 : NV2.24729	0.0580105	4.62107	-0.959008	cnidocyte.nem.2
NvADAM-1 : NV2.24729	0.0410728	7.85024	-1.07074	cnidocyte.early
NvADAM-1 : NV2.24729	0.158186	6.79612	-0.298198	cnidocyte.nep.8
NvADAM-1 : NV2.24729	0.0567515	5.04202	-0.967313	cnidocyte.planula.spir
NvADAM-1 : NV2.24729	0.0693969	2.32558	-0.883897	cnidocyte.spirocyte
NvADAM-1 : NV2.24729	0.0113341	2.53165	-1.26691	cnidocyte.planula.nem
NvADAM-1 : NV2.24729	0.0606427	6.59341	-0.941645	cnidocyte.spirocyte.maturing
NvADAM-1 : NV2.24729	0.158646	15.8621	-0.295164	cnidocyte.maturing.1
NvADAM-1 : NV2.24729	0.429492	25	1.49147	cnidocyte.planula.mat
NvADAM-1 : NV2.24729	0.0380704	4.55312	-1.09054	cnidocyte.nem.1
NvADAM-1 : NV2.24729	0.211286	10.6591	0.0520749	cnidocyte.mature
NvADAM-1 : NV2.24729	0.190992	9.55224	-0.0817933	retractor muscle.RM.1
NvADAM-1 : NV2.24729	0.234504	10.2041	0.205228	retractor muscle.TR.2
NvADAM-1 : NV2.24729	0.128164	6.79612	-0.496242	retractor muscle.TR.1
NvADAM-1 : NV2.24729	0.11284	7.46888	-0.597324	retractor muscle.MR.1
NvADAM-1 : NV2.24729	0.391303	52.4313	1.23956	all.gastrodermis.gastrula.1
NvADAM-1 : NV2.24729	0.118508	2.44479	-0.559934	all.gastrodermis.gastrula.2
NvADAM-1 : NV2.24729	0.150287	26.1146	-0.350303	all.gastrodermis.gastrula.3
NvADAM-1 : NV2.24729	0.171361	2.64097	-0.211293	all.gastrodermis.early.1
NvADAM-1 : NV2.24729	0.235719	32.6693	0.213244	all.gastrodermis.early.2
NvADAM-1 : NV2.24729	0.118418	2.07668	-0.560531	all.gastrodermis.CM
NvADAM-1 : NV2.24729	0.247722	10.7143	0.292423	all.gastrodermis.MR/PM
NvADAM-1 : NV2.24729	0.109966	5.45042	-0.616285	all.gastrodermis.gastrodermis
NvADAM-1 : NV2.24729	0.200445	8.00641	-0.0194363	all.gastrodermis.pharyngeal
NvADAM-1 : NV2.24729	0.127216	7.46269	-0.502492	all.gastrodermis.ImM
NvADAM-1 : NV2.24729	0.082058	4.23977	-0.800379	all.gastrodermis.non-muscle
NvADAM-1 : NV2.24729	0.0664029	2.589	-0.903647	all.gastrodermis.mesentery
NvADAM-1 : NV2.24729	0.159082	4.79042	-0.292288	all.gastrodermis.neuron
NvADAM-1 : NV2.24729	0.095226	4.58015	-0.713516	all.gastrodermis.immune
NvADAM-1 : NV2.24729	0.173854	20.9756	-0.194848	all.gastrodermis.gland
NvADAM-1 : NV2.24729	0.062522	2.25564	-0.929248	all.gastrodermis.ciliated
NvADAM-1 : NV2.24729	0.401737	25.436	1.30838	all.ectoderm.apical organ
NvADAM-1 : NV2.24729	0.557934	48.0806	2.33873	all.ectoderm.early.ect.1
NvADAM-1 : NV2.24729	0.320723	37.4906	0.773975	all.ectoderm.early.ect.2
NvADAM-1 : NV2.24729	0.357029	11.0664	1.01347	all.ectoderm.early.ect.2b
NvADAM-1 : NV2.24729	0.419997	40.1861	1.42884	all.ectoderm.lip
NvADAM-1 : NV2.24729	0.333951	11.1383	0.861234	all.ectoderm.pharyng.
NvADAM-1 : NV2.24729	0.569176	9.26209	2.41289	all.ectoderm.epith.1
NvADAM-1 : NV2.24729	0.472758	21.459	1.77687	all.ectoderm.epith.2
NvADAM-1 : NV2.24729	0.265458	11.902	0.409417	all.ectoderm.epith.3
NvADAM-1 : NV2.24729	0.351798	11.448	0.978962	all.ectoderm.epith.4
NvADAM-2 : NV2.6771	0.144597	13.7329	1.43359	pSC.PGC.Mitotic.1
NvADAM-2 : NV2.6771	0.124893	13.4228	1.06538	pSC.PGC.Mitotic.2
NvADAM-2 : NV2.6771	0.0618717	6.02103	-0.112318	pSC.PGC.NPC
NvADAM-2 : NV2.6771	0.0825556	7.8481	0.274209	pSC.PGC.NPC.g
NvADAM-2 : NV2.6771	0.232389	10.8696	2.5	pSC.PGC.PGC
NvADAM-2 : NV2.6771	0.163854	5.88235	1.79346	pSC.PGC.primary.oocyte
NvADAM-2 : NV2.6771	0.0417671	2.0592	-0.488021	pSC.PGC.spermatagonia
NvADAM-2 : NV2.6771	0.00393326	0.434783	-1.19503	pSC.PGC.maturing.sperm
NvADAM-2 : NV2.6771	0	0	-1.26854	pSC.PGC.maturing.sperm.2
NvADAM-2 : NV2.6771	0.0390808	4.49438	-0.53822	neurogland.all.S1.L1
NvADAM-2 : NV2.6771	0.117546	8.51064	0.928091	neurogland.all.N1.L1
NvADAM-2 : NV2.6771	0.160573	11.7647	1.73216	neurogland.all.N1.L2
NvADAM-2 : NV2.6771	0.14372	10.4712	1.41722	neurogland.all.N1.L3
NvADAM-2 : NV2.6771	0.0553192	6.15385	-0.234767	neurogland.all.N1.g.early
NvADAM-2 : NV2.6771	0.0102386	1.42857	-1.0772	neurogland.all.N1.g1
NvADAM-2 : NV2.6771	0.0638684	3.94737	-0.0750049	neurogland.all.N1.g2
NvADAM-2 : NV2.6771	0.0773174	2.68199	0.176321	neurogland.all.N1.g3
NvADAM-2 : NV2.6771	0.0846879	2.17391	0.314055	neurogland.all.N1.g4
NvADAM-2 : NV2.6771	0.1992	3.50877	2.45399	neurogland.all.N1.g5
NvADAM-2 : NV2.6771	0.100328	3.14136	0.606332	neurogland.all.N1.early.1
NvADAM-2 : NV2.6771	0.0532005	2.52366	-0.27436	neurogland.all.N1.early.2
NvADAM-2 : NV2.6771	0.0456364	2.65781	-0.415712	neurogland.all.N1.1
NvADAM-2 : NV2.6771	0.118239	5.45455	0.941038	neurogland.all.N1.2
NvADAM-2 : NV2.6771	0.0431317	1.86916	-0.462518	neurogland.all.N1.3
NvADAM-2 : NV2.6771	0	0	-1.26854	neurogland.all.N1.4
NvADAM-2 : NV2.6771	0.0643246	2.7027	-0.0664804	neurogland.all.N1.5
NvADAM-2 : NV2.6771	0.0879955	5.04587	0.375866	neurogland.all.N1.6
NvADAM-2 : NV2.6771	0.0323802	2.05128	-0.663435	neurogland.all.N1S.1
NvADAM-2 : NV2.6771	0.0380878	1.20968	-0.556775	neurogland.all.N1S.2
NvADAM-2 : NV2.6771	0.047259	2.17391	-0.385391	neurogland.all.N1S.3
NvADAM-2 : NV2.6771	0.0464788	2.94118	-0.399971	neurogland.all.N1S.4.early
NvADAM-2 : NV2.6771	0.0568428	3.9801	-0.206296	neurogland.all.N1S.4
NvADAM-2 : NV2.6771	0.0496248	6.15385	-0.341181	neurogland.all.NGD.early
NvADAM-2 : NV2.6771	0.0687465	3.92157	0.0161536	neurogland.all.NGD.1
NvADAM-2 : NV2.6771	0.0509105	6.10998	-0.317154	neurogland.all.SGD.early
NvADAM-2 : NV2.6771	0.0465977	3.28638	-0.397749	neurogland.all.S1.1
NvADAM-2 : NV2.6771	0.0300465	1.38249	-0.707047	neurogland.all.S1.2
NvADAM-2 : NV2.6771	0.0265227	1.08696	-0.772898	neurogland.all.S2.tll.1
NvADAM-2 : NV2.6771	0.018238	2.16216	-0.927715	neurogland.all.S2.tll.2
NvADAM-2 : NV2.6771	0.029434	1.89873	-0.718493	neurogland.all.S2.tll.3
NvADAM-2 : NV2.6771	0	0	-1.26854	neurogland.all.S2.tll.4
NvADAM-2 : NV2.6771	0.0193004	4.3956	-0.907862	neurogland.all.GD.1
NvADAM-2 : NV2.6771	0.0164128	1.44928	-0.961824	neurogland.all.GD.2
NvADAM-2 : NV2.6771	0.00941457	2.35294	-1.0926	neurogland.all.GD.3
NvADAM-2 : NV2.6771	0.0476966	1.9802	-0.377213	neurogland.all.GD.4
NvADAM-2 : NV2.6771	0	0	-1.26854	neurogland.all.GD.5
NvADAM-2 : NV2.6771	0.0294757	1.52672	-0.717713	neurogland.all.S3
NvADAM-2 : NV2.6771	0.191538	8.05369	2.3108	neurogland.all.N2.g1
NvADAM-2 : NV2.6771	0.0452804	3.125	-0.422366	neurogland.all.N2.1
NvADAM-2 : NV2.6771	0.0136129	1.34228	-1.01415	neurogland.all.N2.2
NvADAM-2 : NV2.6771	0.164925	5.12821	1.81348	neurogland.all.N2.3
NvADAM-2 : NV2.6771	0.131493	5.29801	1.18871	neurogland.all.N2.4
NvADAM-2 : NV2.6771	0.0678334	2.38095	-0.000909991	neurogland.all.N2.5
NvADAM-2 : NV2.6771	0.14589	4.83871	1.45776	neurogland.all.N2.6
NvADAM-2 : NV2.6771	0.0611127	1.78571	-0.126501	neurogland.all.N2.7
NvADAM-2 : NV2.6771	0.0430948	5.15873	-0.463208	neurogland.all.immune
NvADAM-2 : NV2.6771	0.0991544	5.4242	0.584397	gland.mucous.1.dev.aboral
NvADAM-2 : NV2.6771	0.0545379	8.98438	-0.249367	gland.mucous.2.dev
NvADAM-2 : NV2.6771	0.0519548	5.74018	-0.297638	gland.mucous.3.dev
NvADAM-2 : NV2.6771	0	0	-1.26854	gland.mucous.4.dev
NvADAM-2 : NV2.6771	0.0263707	1.86335	-0.775738	gland.mucous.5.adult
NvADAM-2 : NV2.6771	0.0245319	1.19904	-0.8101	gland.mucous.6.adult
NvADAM-2 : NV2.6771	0	0	-1.26854	gland.mucous.7.adult
NvADAM-2 : NV2.6771	0.0938285	9.66825	0.48487	unchar.immune.1.early.gastrula
NvADAM-2 : NV2.6771	0.0750664	10.7056	0.134255	unchar.immune.2.mid.gastrula
NvADAM-2 : NV2.6771	0.0650755	6.65362	-0.0524474	unchar.immune.3.planula
NvADAM-2 : NV2.6771	0.102345	3.76623	0.644019	unchar.immune.4.mature
NvADAM-2 : NV2.6771	0.0340717	4.85437	-0.631826	cnidocyte.pSC
NvADAM-2 : NV2.6771	0.0344818	3.80435	-0.624162	cnidocyte.gast.1
NvADAM-2 : NV2.6771	0.0201808	2.77264	-0.891411	cnidocyte.nem.2
NvADAM-2 : NV2.6771	0.0194717	3.38164	-0.904661	cnidocyte.early
NvADAM-2 : NV2.6771	0.0135864	1.94175	-1.01464	cnidocyte.nep.8
NvADAM-2 : NV2.6771	0.0661148	7.56303	-0.0330263	cnidocyte.planula.spir
NvADAM-2 : NV2.6771	0.0548722	1.16279	-0.24312	cnidocyte.spirocyte
NvADAM-2 : NV2.6771	0.0142554	2.53165	-1.00214	cnidocyte.planula.nem
NvADAM-2 : NV2.6771	0	0	-1.26854	cnidocyte.spirocyte.maturing
NvADAM-2 : NV2.6771	0.0316246	1.83908	-0.677556	cnidocyte.maturing.1
NvADAM-2 : NV2.6771	0.110576	8.33333	0.797841	cnidocyte.planula.mat
NvADAM-2 : NV2.6771	0.00529627	1.34907	-1.16956	cnidocyte.nem.1
NvADAM-2 : NV2.6771	0.0680781	3.49878	0.00366252	cnidocyte.mature
NvADAM-2 : NV2.6771	0.0651565	3.28358	-0.0509347	retractor muscle.RM.1
NvADAM-2 : NV2.6771	0.0742653	3.67347	0.119285	retractor muscle.TR.2
NvADAM-2 : NV2.6771	0.103975	4.85437	0.674483	retractor muscle.TR.1
NvADAM-2 : NV2.6771	0.0242448	1.65975	-0.815465	retractor muscle.MR.1
NvADAM-2 : NV2.6771	0.198934	34.4609	2.44901	all.gastrodermis.gastrula.1
NvADAM-2 : NV2.6771	0.0658507	1.49842	-0.0379611	all.gastrodermis.gastrula.2
NvADAM-2 : NV2.6771	0.143842	30.3609	1.41948	all.gastrodermis.gastrula.3
NvADAM-2 : NV2.6771	0.119908	1.85582	0.972222	all.gastrodermis.early.1
NvADAM-2 : NV2.6771	0.152934	24.004	1.58939	all.gastrodermis.early.2
NvADAM-2 : NV2.6771	0.0874115	1.51757	0.364952	all.gastrodermis.CM
NvADAM-2 : NV2.6771	0.0764862	4.57143	0.160788	all.gastrodermis.MR/PM
NvADAM-2 : NV2.6771	0.0438627	2.19531	-0.448859	all.gastrodermis.gastrodermis
NvADAM-2 : NV2.6771	0.112793	4.56365	0.839261	all.gastrodermis.pharyngeal
NvADAM-2 : NV2.6771	0.0502924	2.68657	-0.328705	all.gastrodermis.ImM
NvADAM-2 : NV2.6771	0.0675559	2.92398	-0.00609535	all.gastrodermis.non-muscle
NvADAM-2 : NV2.6771	0.0277035	0.970874	-0.750831	all.gastrodermis.mesentery
NvADAM-2 : NV2.6771	0.123028	3.59281	1.03053	all.gastrodermis.neuron
NvADAM-2 : NV2.6771	0.283928	6.10687	2.5	all.gastrodermis.immune
NvADAM-2 : NV2.6771	0.0820181	10.2439	0.264164	all.gastrodermis.gland
NvADAM-2 : NV2.6771	0	0	-1.26854	all.gastrodermis.ciliated
NvADAM-2 : NV2.6771	0.0908162	6.68605	0.428578	all.ectoderm.apical organ
NvADAM-2 : NV2.6771	0.0634563	10.0365	-0.0827064	all.ectoderm.early.ect.1
NvADAM-2 : NV2.6771	0.057623	9.35395	-0.191715	all.ectoderm.early.ect.2
NvADAM-2 : NV2.6771	0.0657337	2.41449	-0.0401478	all.ectoderm.early.ect.2b
NvADAM-2 : NV2.6771	0.0676285	10.9983	-0.00473948	all.ectoderm.lip
NvADAM-2 : NV2.6771	0.0548324	2.68085	-0.243863	all.ectoderm.pharyng.
NvADAM-2 : NV2.6771	0.083536	1.53944	0.29253	all.ectoderm.epith.1
NvADAM-2 : NV2.6771	0.0687155	3.81129	0.0155732	all.ectoderm.epith.2
NvADAM-2 : NV2.6771	0.0629986	3.25297	-0.0912586	all.ectoderm.epith.3
NvADAM-2 : NV2.6771	0.0335083	1.48515	-0.642354	all.ectoderm.epith.4
NvADAM-3 : NV2.13893	0.38542	30.5766	1.75384	pSC.PGC.Mitotic.1
NvADAM-3 : NV2.13893	0.312525	29.6421	1.11999	pSC.PGC.Mitotic.2
NvADAM-3 : NV2.13893	0.260707	19.5604	0.669407	pSC.PGC.NPC
NvADAM-3 : NV2.13893	0.135492	11.5612	-0.419398	pSC.PGC.NPC.g
NvADAM-3 : NV2.13893	0.0102225	2.17391	-1.50868	pSC.PGC.PGC
NvADAM-3 : NV2.13893	0.321792	5.88235	1.20057	pSC.PGC.primary.oocyte
NvADAM-3 : NV2.13893	0.155201	7.07851	-0.24802	pSC.PGC.spermatagonia
NvADAM-3 : NV2.13893	0.00224926	0.434783	-1.57801	pSC.PGC.maturing.sperm
NvADAM-3 : NV2.13893	0	0	-1.59757	pSC.PGC.maturing.sperm.2
NvADAM-3 : NV2.13893	0.215769	14.6067	0.278648	neurogland.all.S1.L1
NvADAM-3 : NV2.13893	0.166931	19.1489	-0.146019	neurogland.all.N1.L1
NvADAM-3 : NV2.13893	0.293927	25	0.958272	neurogland.all.N1.L2
NvADAM-3 : NV2.13893	0.177322	13.089	-0.0556668	neurogland.all.N1.L3
NvADAM-3 : NV2.13893	0.162589	7.69231	-0.183774	neurogland.all.N1.g.early
NvADAM-3 : NV2.13893	0.132405	5.71429	-0.446238	neurogland.all.N1.g1
NvADAM-3 : NV2.13893	0.0190528	1.31579	-1.43189	neurogland.all.N1.g2
NvADAM-3 : NV2.13893	0.124567	4.5977	-0.514393	neurogland.all.N1.g3
NvADAM-3 : NV2.13893	0.0981194	4.34783	-0.744372	neurogland.all.N1.g4
NvADAM-3 : NV2.13893	0.0522761	1.75439	-1.143	neurogland.all.N1.g5
NvADAM-3 : NV2.13893	0.0894529	4.71204	-0.819731	neurogland.all.N1.early.1
NvADAM-3 : NV2.13893	0.178564	8.20189	-0.044864	neurogland.all.N1.early.2
NvADAM-3 : NV2.13893	0.359341	11.2957	1.52707	neurogland.all.N1.1
NvADAM-3 : NV2.13893	0.0702964	3.63636	-0.986306	neurogland.all.N1.2
NvADAM-3 : NV2.13893	0.134407	4.6729	-0.42883	neurogland.all.N1.3
NvADAM-3 : NV2.13893	0.0459648	1.72414	-1.19788	neurogland.all.N1.4
NvADAM-3 : NV2.13893	0.167519	5.40541	-0.140913	neurogland.all.N1.5
NvADAM-3 : NV2.13893	0.204336	6.42202	0.179235	neurogland.all.N1.6
NvADAM-3 : NV2.13893	0.22069	8.71795	0.321438	neurogland.all.N1S.1
NvADAM-3 : NV2.13893	0.109947	4.43548	-0.641523	neurogland.all.N1S.2
NvADAM-3 : NV2.13893	0.156636	4.34783	-0.235542	neurogland.all.N1S.3
NvADAM-3 : NV2.13893	0.227998	17.6471	0.38498	neurogland.all.N1S.4.early
NvADAM-3 : NV2.13893	0.297989	12.4378	0.993587	neurogland.all.N1S.4
NvADAM-3 : NV2.13893	0.371575	29.2308	1.63345	neurogland.all.NGD.early
NvADAM-3 : NV2.13893	0.156627	9.80392	-0.235624	neurogland.all.NGD.1
NvADAM-3 : NV2.13893	0.254458	21.9959	0.61507	neurogland.all.SGD.early
NvADAM-3 : NV2.13893	0.0659725	3.28638	-1.0239	neurogland.all.S1.1
NvADAM-3 : NV2.13893	0.282236	8.29493	0.85661	neurogland.all.S1.2
NvADAM-3 : NV2.13893	0.131335	5.07246	-0.455543	neurogland.all.S2.tll.1
NvADAM-3 : NV2.13893	0.0893194	7.02703	-0.820892	neurogland.all.S2.tll.2
NvADAM-3 : NV2.13893	0.101733	5.6962	-0.712952	neurogland.all.S2.tll.3
NvADAM-3 : NV2.13893	0.248416	5.45455	0.562533	neurogland.all.S2.tll.4
NvADAM-3 : NV2.13893	0.136312	5.49451	-0.412269	neurogland.all.GD.1
NvADAM-3 : NV2.13893	0.123529	7.24638	-0.523427	neurogland.all.GD.2
NvADAM-3 : NV2.13893	0.0832907	7.64706	-0.873314	neurogland.all.GD.3
NvADAM-3 : NV2.13893	0.122072	10.396	-0.536094	neurogland.all.GD.4
NvADAM-3 : NV2.13893	0.0755408	5.95238	-0.940703	neurogland.all.GD.5
NvADAM-3 : NV2.13893	0.0327501	1.52672	-1.31279	neurogland.all.S3
NvADAM-3 : NV2.13893	0.0935506	6.04027	-0.784099	neurogland.all.N2.g1
NvADAM-3 : NV2.13893	0.158996	5.72917	-0.215025	neurogland.all.N2.1
NvADAM-3 : NV2.13893	0.240434	7.38255	0.493118	neurogland.all.N2.2
NvADAM-3 : NV2.13893	0.193517	7.69231	0.0851575	neurogland.all.N2.3
NvADAM-3 : NV2.13893	0.0818082	5.29801	-0.886206	neurogland.all.N2.4
NvADAM-3 : NV2.13893	0.0573171	2.38095	-1.09917	neurogland.all.N2.5
NvADAM-3 : NV2.13893	0.148085	3.22581	-0.309894	neurogland.all.N2.6
NvADAM-3 : NV2.13893	0.151689	5.35714	-0.278558	neurogland.all.N2.7
NvADAM-3 : NV2.13893	0.294219	17.8571	0.960811	neurogland.all.immune
NvADAM-3 : NV2.13893	0.275899	18.4979	0.801508	gland.mucous.1.dev.aboral
NvADAM-3 : NV2.13893	0.216078	26.9531	0.281331	gland.mucous.2.dev
NvADAM-3 : NV2.13893	0.32319	32.0242	1.21273	gland.mucous.3.dev
NvADAM-3 : NV2.13893	0.0701588	1.85185	-0.987503	gland.mucous.4.dev
NvADAM-3 : NV2.13893	0.20658	10.9731	0.198749	gland.mucous.5.adult
NvADAM-3 : NV2.13893	0.148671	6.47482	-0.304798	gland.mucous.6.adult
NvADAM-3 : NV2.13893	0.129294	3.84615	-0.473298	gland.mucous.7.adult
NvADAM-3 : NV2.13893	0.467848	33.6493	2.47059	unchar.immune.1.early.gastrula
NvADAM-3 : NV2.13893	0.477607	45.9854	2.5	unchar.immune.2.mid.gastrula
NvADAM-3 : NV2.13893	0.281833	25.636	0.853108	unchar.immune.3.planula
NvADAM-3 : NV2.13893	0.307497	13.8961	1.07626	unchar.immune.4.mature
NvADAM-3 : NV2.13893	0.0512219	4.07767	-1.15217	cnidocyte.pSC
NvADAM-3 : NV2.13893	0.0972101	8.55978	-0.752278	cnidocyte.gast.1
NvADAM-3 : NV2.13893	0.0666052	3.69686	-1.0184	cnidocyte.nem.2
NvADAM-3 : NV2.13893	0.0282752	6.15942	-1.3517	cnidocyte.early
NvADAM-3 : NV2.13893	0.0225615	1.45631	-1.40138	cnidocyte.nep.8
NvADAM-3 : NV2.13893	0.034613	6.72269	-1.29659	cnidocyte.planula.spir
NvADAM-3 : NV2.13893	0.00555132	0.775194	-1.5493	cnidocyte.spirocyte
NvADAM-3 : NV2.13893	0.0626794	5.06329	-1.05254	cnidocyte.planula.nem
NvADAM-3 : NV2.13893	0.200585	6.59341	0.146612	cnidocyte.spirocyte.maturing
NvADAM-3 : NV2.13893	0.122549	11.2644	-0.531942	cnidocyte.maturing.1
NvADAM-3 : NV2.13893	0.503665	25	2.5	cnidocyte.planula.mat
NvADAM-3 : NV2.13893	0.0158151	2.02361	-1.46005	cnidocyte.nem.1
NvADAM-3 : NV2.13893	0.357857	11.6355	1.51417	cnidocyte.mature
NvADAM-3 : NV2.13893	0.152183	6.56716	-0.274266	retractor muscle.RM.1
NvADAM-3 : NV2.13893	0.152947	6.12245	-0.267616	retractor muscle.TR.2
NvADAM-3 : NV2.13893	0.0744989	3.8835	-0.949763	retractor muscle.TR.1
NvADAM-3 : NV2.13893	0.188603	7.88382	0.0424284	retractor muscle.MR.1
NvADAM-3 : NV2.13893	0.30419	48.203	1.04751	all.gastrodermis.gastrula.1
NvADAM-3 : NV2.13893	0.111411	2.36593	-0.628795	all.gastrodermis.gastrula.2
NvADAM-3 : NV2.13893	0.172785	30.7856	-0.0951217	all.gastrodermis.gastrula.3
NvADAM-3 : NV2.13893	0.166291	2.71235	-0.151584	all.gastrodermis.early.1
NvADAM-3 : NV2.13893	0.173074	25.5976	-0.0926084	all.gastrodermis.early.2
NvADAM-3 : NV2.13893	0.10979	1.75719	-0.642893	all.gastrodermis.CM
NvADAM-3 : NV2.13893	0.112405	6.71429	-0.620151	all.gastrodermis.MR/PM
NvADAM-3 : NV2.13893	0.161305	7.87282	-0.194944	all.gastrodermis.gastrodermis
NvADAM-3 : NV2.13893	0.185031	7.60608	0.0113647	all.gastrodermis.pharyngeal
NvADAM-3 : NV2.13893	0.198456	10.4478	0.128106	all.gastrodermis.ImM
NvADAM-3 : NV2.13893	0.311308	10.5263	1.10941	all.gastrodermis.non-muscle
NvADAM-3 : NV2.13893	0.200098	8.09061	0.142379	all.gastrodermis.mesentery
NvADAM-3 : NV2.13893	0.158124	7.78443	-0.222601	all.gastrodermis.neuron
NvADAM-3 : NV2.13893	0.326321	11.4504	1.23995	all.gastrodermis.immune
NvADAM-3 : NV2.13893	0.195455	17.561	0.10201	all.gastrodermis.gland
NvADAM-3 : NV2.13893	0.109894	3.7594	-0.641988	all.gastrodermis.ciliated
NvADAM-3 : NV2.13893	0.470695	24.4186	2.49535	all.ectoderm.apical organ
NvADAM-3 : NV2.13893	0.24227	29.8091	0.509086	all.ectoderm.early.ect.1
NvADAM-3 : NV2.13893	0.400513	45.7471	1.88509	all.ectoderm.early.ect.2
NvADAM-3 : NV2.13893	0.23354	7.2837	0.433172	all.ectoderm.early.ect.2b
NvADAM-3 : NV2.13893	0.250509	31.6413	0.580726	all.ectoderm.lip
NvADAM-3 : NV2.13893	0.234536	8.02128	0.441839	all.ectoderm.pharyng.
NvADAM-3 : NV2.13893	0.346844	5.75064	1.4184	all.ectoderm.epith.1
NvADAM-3 : NV2.13893	0.408093	18.4667	1.951	all.ectoderm.epith.2
NvADAM-3 : NV2.13893	0.302248	12.7057	1.03062	all.ectoderm.epith.3
NvADAM-3 : NV2.13893	0.297871	10.5198	0.992564	all.ectoderm.epith.4
NvADAM-4 : NV2.18385	0.0472269	4.02124	-0.402329	pSC.PGC.Mitotic.1
NvADAM-4 : NV2.18385	0.033373	3.46756	-0.620159	pSC.PGC.Mitotic.2
NvADAM-4 : NV2.18385	0.0417721	4.07773	-0.488097	pSC.PGC.NPC
NvADAM-4 : NV2.18385	0.0552247	5.7384	-0.276577	pSC.PGC.NPC.g
NvADAM-4 : NV2.18385	0	0	-1.1449	pSC.PGC.PGC
NvADAM-4 : NV2.18385	0.144388	5.88235	1.12537	pSC.PGC.primary.oocyte
NvADAM-4 : NV2.18385	0.0499949	3.2175	-0.358806	pSC.PGC.spermatagonia
NvADAM-4 : NV2.18385	0.0131628	1.30435	-0.937931	pSC.PGC.maturing.sperm
NvADAM-4 : NV2.18385	0.0160054	0.458716	-0.893236	pSC.PGC.maturing.sperm.2
NvADAM-4 : NV2.18385	0.0286211	4.49438	-0.694875	neurogland.all.S1.L1
NvADAM-4 : NV2.18385	0.104023	6.38298	0.490691	neurogland.all.N1.L1
NvADAM-4 : NV2.18385	0.283953	17.1569	2.5	neurogland.all.N1.L2
NvADAM-4 : NV2.18385	0.179042	11.5183	1.67025	neurogland.all.N1.L3
NvADAM-4 : NV2.18385	0.0695603	6.15385	-0.0511726	neurogland.all.N1.g.early
NvADAM-4 : NV2.18385	0.00390747	0.714286	-1.08346	neurogland.all.N1.g1
NvADAM-4 : NV2.18385	0.104984	3.94737	0.505807	neurogland.all.N1.g2
NvADAM-4 : NV2.18385	0.118168	3.44828	0.713105	neurogland.all.N1.g3
NvADAM-4 : NV2.18385	0.00732549	1.08696	-1.02971	neurogland.all.N1.g4
NvADAM-4 : NV2.18385	0.0652903	5.26316	-0.118311	neurogland.all.N1.g5
NvADAM-4 : NV2.18385	0.155902	5.2356	1.30641	neurogland.all.N1.early.1
NvADAM-4 : NV2.18385	0.179128	7.25552	1.6716	neurogland.all.N1.early.2
NvADAM-4 : NV2.18385	0.148786	3.65449	1.19453	neurogland.all.N1.1
NvADAM-4 : NV2.18385	0.1241	1.81818	0.806369	neurogland.all.N1.2
NvADAM-4 : NV2.18385	0.0576068	1.86916	-0.239122	neurogland.all.N1.3
NvADAM-4 : NV2.18385	0.0565662	1.72414	-0.255483	neurogland.all.N1.4
NvADAM-4 : NV2.18385	0.00836646	1.35135	-1.01335	neurogland.all.N1.5
NvADAM-4 : NV2.18385	0.0870553	4.58716	0.223909	neurogland.all.N1.6
NvADAM-4 : NV2.18385	0.0800005	2.05128	0.112983	neurogland.all.N1S.1
NvADAM-4 : NV2.18385	0.0545428	1.6129	-0.287297	neurogland.all.N1S.2
NvADAM-4 : NV2.18385	0	0	-1.1449	neurogland.all.N1S.3
NvADAM-4 : NV2.18385	0.0189119	2.94118	-0.847536	neurogland.all.N1S.4.early
NvADAM-4 : NV2.18385	0.109187	4.97512	0.571887	neurogland.all.N1S.4
NvADAM-4 : NV2.18385	0.034605	6.15385	-0.600787	neurogland.all.NGD.early
NvADAM-4 : NV2.18385	0.0725357	3.92157	-0.00438855	neurogland.all.NGD.1
NvADAM-4 : NV2.18385	0.0479166	5.90631	-0.391485	neurogland.all.SGD.early
NvADAM-4 : NV2.18385	0.162422	5.16432	1.40894	neurogland.all.S1.1
NvADAM-4 : NV2.18385	0.022305	0.921659	-0.794184	neurogland.all.S1.2
NvADAM-4 : NV2.18385	0.10947	1.44928	0.576336	neurogland.all.S2.tll.1
NvADAM-4 : NV2.18385	0.0350413	3.24324	-0.593928	neurogland.all.S2.tll.2
NvADAM-4 : NV2.18385	0.0536181	1.89873	-0.301838	neurogland.all.S2.tll.3
NvADAM-4 : NV2.18385	0.0457519	1.81818	-0.42552	neurogland.all.S2.tll.4
NvADAM-4 : NV2.18385	0.154692	4.3956	1.28738	neurogland.all.GD.1
NvADAM-4 : NV2.18385	0.130238	4.34783	0.902882	neurogland.all.GD.2
NvADAM-4 : NV2.18385	0.0756965	5.29412	0.0453102	neurogland.all.GD.3
NvADAM-4 : NV2.18385	0.0699361	3.9604	-0.0452638	neurogland.all.GD.4
NvADAM-4 : NV2.18385	0.00622634	1.19048	-1.047	neurogland.all.GD.5
NvADAM-4 : NV2.18385	0.364245	4.58015	2.5	neurogland.all.S3
NvADAM-4 : NV2.18385	0.178319	8.72483	1.65889	neurogland.all.N2.g1
NvADAM-4 : NV2.18385	0.00877908	1.04167	-1.00686	neurogland.all.N2.1
NvADAM-4 : NV2.18385	0.0565251	2.01342	-0.25613	neurogland.all.N2.2
NvADAM-4 : NV2.18385	0.0688529	2.13675	-0.0622948	neurogland.all.N2.3
NvADAM-4 : NV2.18385	0.0958477	3.97351	0.362154	neurogland.all.N2.4
NvADAM-4 : NV2.18385	0.0845509	2.38095	0.18453	neurogland.all.N2.5
NvADAM-4 : NV2.18385	0.0278166	2.41935	-0.707525	neurogland.all.N2.6
NvADAM-4 : NV2.18385	0.052707	1.78571	-0.316162	neurogland.all.N2.7
NvADAM-4 : NV2.18385	0.0718783	4.36508	-0.0147258	neurogland.all.immune
NvADAM-4 : NV2.18385	0.0934468	6.9541	0.324404	gland.mucous.1.dev.aboral
NvADAM-4 : NV2.18385	0.0572785	7.8125	-0.244284	gland.mucous.2.dev
NvADAM-4 : NV2.18385	0.215392	19.9396	2.2418	gland.mucous.3.dev
NvADAM-4 : NV2.18385	0.198373	1.85185	1.9742	gland.mucous.4.dev
NvADAM-4 : NV2.18385	0.0194251	1.44928	-0.839467	gland.mucous.5.adult
NvADAM-4 : NV2.18385	0.0802918	1.91847	0.117564	gland.mucous.6.adult
NvADAM-4 : NV2.18385	0.174444	5.12821	1.59795	gland.mucous.7.adult
NvADAM-4 : NV2.18385	0.0404398	4.45498	-0.509045	unchar.immune.1.early.gastrula
NvADAM-4 : NV2.18385	0.118881	13.6253	0.724312	unchar.immune.2.mid.gastrula
NvADAM-4 : NV2.18385	0.0396996	4.89237	-0.520683	unchar.immune.3.planula
NvADAM-4 : NV2.18385	0.0825965	4.15584	0.153801	unchar.immune.4.mature
NvADAM-4 : NV2.18385	0.00615239	0.970874	-1.04816	cnidocyte.pSC
NvADAM-4 : NV2.18385	0.013745	1.7663	-0.928777	cnidocyte.gast.1
NvADAM-4 : NV2.18385	0.0350954	0.739372	-0.593077	cnidocyte.nem.2
NvADAM-4 : NV2.18385	0.0055273	1.44928	-1.05799	cnidocyte.early
NvADAM-4 : NV2.18385	0.0196692	0.485437	-0.835628	cnidocyte.nep.8
NvADAM-4 : NV2.18385	0.0347104	2.52101	-0.599131	cnidocyte.planula.spir
NvADAM-4 : NV2.18385	0	0	-1.1449	cnidocyte.spirocyte
NvADAM-4 : NV2.18385	0	0	-1.1449	cnidocyte.planula.nem
NvADAM-4 : NV2.18385	0	0	-1.1449	cnidocyte.spirocyte.maturing
NvADAM-4 : NV2.18385	0.0203821	2.75862	-0.824419	cnidocyte.maturing.1
NvADAM-4 : NV2.18385	0.0777462	8.33333	0.0775385	cnidocyte.planula.mat
NvADAM-4 : NV2.18385	0.000513878	0.168634	-1.13682	cnidocyte.nem.1
NvADAM-4 : NV2.18385	0.0717913	2.27828	-0.0160937	cnidocyte.mature
NvADAM-4 : NV2.18385	0.0270154	1.79104	-0.720122	retractor muscle.RM.1
NvADAM-4 : NV2.18385	0.0704241	3.26531	-0.0375909	retractor muscle.TR.2
NvADAM-4 : NV2.18385	0	0	-1.1449	retractor muscle.TR.1
NvADAM-4 : NV2.18385	0.0115719	1.24481	-0.962947	retractor muscle.MR.1
NvADAM-4 : NV2.18385	0.106072	22.4101	0.522918	all.gastrodermis.gastrula.1
NvADAM-4 : NV2.18385	0.0435426	0.867508	-0.460258	all.gastrodermis.gastrula.2
NvADAM-4 : NV2.18385	0.0986543	19.9575	0.406284	all.gastrodermis.gastrula.3
NvADAM-4 : NV2.18385	0.11477	1.85582	0.659674	all.gastrodermis.early.1
NvADAM-4 : NV2.18385	0.0955611	14.8406	0.357649	all.gastrodermis.early.2
NvADAM-4 : NV2.18385	0.0400544	0.638978	-0.515105	all.gastrodermis.CM
NvADAM-4 : NV2.18385	0.0374419	2.42857	-0.556181	all.gastrodermis.MR/PM
NvADAM-4 : NV2.18385	0.0445132	1.96821	-0.444997	all.gastrodermis.gastrodermis
NvADAM-4 : NV2.18385	0.0591807	2.88231	-0.214375	all.gastrodermis.pharyngeal
NvADAM-4 : NV2.18385	0.123439	3.58209	0.79598	all.gastrodermis.ImM
NvADAM-4 : NV2.18385	0.110271	4.38596	0.588936	all.gastrodermis.non-muscle
NvADAM-4 : NV2.18385	0.193134	5.82524	1.89182	all.gastrodermis.mesentery
NvADAM-4 : NV2.18385	0.184574	4.79042	1.75723	all.gastrodermis.neuron
NvADAM-4 : NV2.18385	0.151226	5.34351	1.23289	all.gastrodermis.immune
NvADAM-4 : NV2.18385	0.0199623	3.90244	-0.831021	all.gastrodermis.gland
NvADAM-4 : NV2.18385	0.0114267	0.75188	-0.965228	all.gastrodermis.ciliated
NvADAM-4 : NV2.18385	0.134507	8.13953	0.970004	all.ectoderm.apical organ
NvADAM-4 : NV2.18385	0.0428635	7.37722	-0.470936	all.ectoderm.early.ect.1
NvADAM-4 : NV2.18385	0.0830286	12.3472	0.160595	all.ectoderm.early.ect.2
NvADAM-4 : NV2.18385	0.0203014	0.684105	-0.825688	all.ectoderm.early.ect.2b
NvADAM-4 : NV2.18385	0.0965212	14.2132	0.372744	all.ectoderm.lip
NvADAM-4 : NV2.18385	0.036603	1.6383	-0.569372	all.ectoderm.pharyng.
NvADAM-4 : NV2.18385	0.0512801	0.916031	-0.338598	all.ectoderm.epith.1
NvADAM-4 : NV2.18385	0.0517796	2.56634	-0.330745	all.ectoderm.epith.2
NvADAM-4 : NV2.18385	0.035303	1.64562	-0.589812	all.ectoderm.epith.3
NvADAM-4 : NV2.18385	0.0328598	0.804455	-0.628228	all.ectoderm.epith.4
NvADAM-like : NV2.20818	0	0	-0.121708	pSC.PGC.Mitotic.1
NvADAM-like : NV2.20818	0	0	-0.121708	pSC.PGC.Mitotic.2
NvADAM-like : NV2.20818	0	0	-0.121708	pSC.PGC.NPC
NvADAM-like : NV2.20818	0	0	-0.121708	pSC.PGC.NPC.g
NvADAM-like : NV2.20818	0	0	-0.121708	pSC.PGC.PGC
NvADAM-like : NV2.20818	0	0	-0.121708	pSC.PGC.primary.oocyte
NvADAM-like : NV2.20818	0.0412705	1.0296	-0.10667	pSC.PGC.spermatagonia
NvADAM-like : NV2.20818	8.36473	63.4783	2.5	pSC.PGC.maturing.sperm
NvADAM-like : NV2.20818	27.6257	99.0826	2.5	pSC.PGC.maturing.sperm.2
NvADAM-like : NV2.20818	0	0	-0.121708	neurogland.all.S1.L1
NvADAM-like : NV2.20818	0	0	-0.121708	neurogland.all.N1.L1
NvADAM-like : NV2.20818	0	0	-0.121708	neurogland.all.N1.L2
NvADAM-like : NV2.20818	0	0	-0.121708	neurogland.all.N1.L3
NvADAM-like : NV2.20818	0	0	-0.121708	neurogland.all.N1.g.early
NvADAM-like : NV2.20818	0	0	-0.121708	neurogland.all.N1.g1
NvADAM-like : NV2.20818	0	0	-0.121708	neurogland.all.N1.g2
NvADAM-like : NV2.20818	0.224848	0.383142	-0.0397789	neurogland.all.N1.g3
NvADAM-like : NV2.20818	0	0	-0.121708	neurogland.all.N1.g4
NvADAM-like : NV2.20818	0	0	-0.121708	neurogland.all.N1.g5
NvADAM-like : NV2.20818	0	0	-0.121708	neurogland.all.N1.early.1
NvADAM-like : NV2.20818	0	0	-0.121708	neurogland.all.N1.early.2
NvADAM-like : NV2.20818	0	0	-0.121708	neurogland.all.N1.1
NvADAM-like : NV2.20818	0	0	-0.121708	neurogland.all.N1.2
NvADAM-like : NV2.20818	0	0	-0.121708	neurogland.all.N1.3
NvADAM-like : NV2.20818	0	0	-0.121708	neurogland.all.N1.4
NvADAM-like : NV2.20818	0	0	-0.121708	neurogland.all.N1.5
NvADAM-like : NV2.20818	0	0	-0.121708	neurogland.all.N1.6
NvADAM-like : NV2.20818	0	0	-0.121708	neurogland.all.N1S.1
NvADAM-like : NV2.20818	0.015875	0.403226	-0.115924	neurogland.all.N1S.2
NvADAM-like : NV2.20818	0	0	-0.121708	neurogland.all.N1S.3
NvADAM-like : NV2.20818	0	0	-0.121708	neurogland.all.N1S.4.early
NvADAM-like : NV2.20818	0	0	-0.121708	neurogland.all.N1S.4
NvADAM-like : NV2.20818	0	0	-0.121708	neurogland.all.NGD.early
NvADAM-like : NV2.20818	0	0	-0.121708	neurogland.all.NGD.1
NvADAM-like : NV2.20818	0.0368367	0.203666	-0.108286	neurogland.all.SGD.early
NvADAM-like : NV2.20818	0	0	-0.121708	neurogland.all.S1.1
NvADAM-like : NV2.20818	0	0	-0.121708	neurogland.all.S1.2
NvADAM-like : NV2.20818	0	0	-0.121708	neurogland.all.S2.tll.1
NvADAM-like : NV2.20818	0	0	-0.121708	neurogland.all.S2.tll.2
NvADAM-like : NV2.20818	0	0	-0.121708	neurogland.all.S2.tll.3
NvADAM-like : NV2.20818	0	0	-0.121708	neurogland.all.S2.tll.4
NvADAM-like : NV2.20818	0	0	-0.121708	neurogland.all.GD.1
NvADAM-like : NV2.20818	0	0	-0.121708	neurogland.all.GD.2
NvADAM-like : NV2.20818	0	0	-0.121708	neurogland.all.GD.3
NvADAM-like : NV2.20818	0	0	-0.121708	neurogland.all.GD.4
NvADAM-like : NV2.20818	0	0	-0.121708	neurogland.all.GD.5
NvADAM-like : NV2.20818	0.0441503	0.763359	-0.105621	neurogland.all.S3
NvADAM-like : NV2.20818	0	0	-0.121708	neurogland.all.N2.g1
NvADAM-like : NV2.20818	0	0	-0.121708	neurogland.all.N2.1
NvADAM-like : NV2.20818	0	0	-0.121708	neurogland.all.N2.2
NvADAM-like : NV2.20818	0	0	-0.121708	neurogland.all.N2.3
NvADAM-like : NV2.20818	0	0	-0.121708	neurogland.all.N2.4
NvADAM-like : NV2.20818	0	0	-0.121708	neurogland.all.N2.5
NvADAM-like : NV2.20818	0	0	-0.121708	neurogland.all.N2.6
NvADAM-like : NV2.20818	0	0	-0.121708	neurogland.all.N2.7
NvADAM-like : NV2.20818	0	0	-0.121708	neurogland.all.immune
NvADAM-like : NV2.20818	0	0	-0.121708	gland.mucous.1.dev.aboral
NvADAM-like : NV2.20818	0	0	-0.121708	gland.mucous.2.dev
NvADAM-like : NV2.20818	0	0	-0.121708	gland.mucous.3.dev
NvADAM-like : NV2.20818	0	0	-0.121708	gland.mucous.4.dev
NvADAM-like : NV2.20818	0	0	-0.121708	gland.mucous.5.adult
NvADAM-like : NV2.20818	0	0	-0.121708	gland.mucous.6.adult
NvADAM-like : NV2.20818	0	0	-0.121708	gland.mucous.7.adult
NvADAM-like : NV2.20818	0	0	-0.121708	unchar.immune.1.early.gastrula
NvADAM-like : NV2.20818	0	0	-0.121708	unchar.immune.2.mid.gastrula
NvADAM-like : NV2.20818	0	0	-0.121708	unchar.immune.3.planula
NvADAM-like : NV2.20818	0	0	-0.121708	unchar.immune.4.mature
NvADAM-like : NV2.20818	0	0	-0.121708	cnidocyte.pSC
NvADAM-like : NV2.20818	0	0	-0.121708	cnidocyte.gast.1
NvADAM-like : NV2.20818	0	0	-0.121708	cnidocyte.nem.2
NvADAM-like : NV2.20818	0	0	-0.121708	cnidocyte.early
NvADAM-like : NV2.20818	0.0276445	0.485437	-0.111635	cnidocyte.nep.8
NvADAM-like : NV2.20818	0	0	-0.121708	cnidocyte.planula.spir
NvADAM-like : NV2.20818	0	0	-0.121708	cnidocyte.spirocyte
NvADAM-like : NV2.20818	0	0	-0.121708	cnidocyte.planula.nem
NvADAM-like : NV2.20818	0	0	-0.121708	cnidocyte.spirocyte.maturing
NvADAM-like : NV2.20818	0	0	-0.121708	cnidocyte.maturing.1
NvADAM-like : NV2.20818	0.0184178	2.77778	-0.114997	cnidocyte.planula.mat
NvADAM-like : NV2.20818	0	0	-0.121708	cnidocyte.nem.1
NvADAM-like : NV2.20818	0	0	-0.121708	cnidocyte.mature
NvADAM-like : NV2.20818	0	0	-0.121708	retractor muscle.RM.1
NvADAM-like : NV2.20818	0	0	-0.121708	retractor muscle.TR.2
NvADAM-like : NV2.20818	0	0	-0.121708	retractor muscle.TR.1
NvADAM-like : NV2.20818	0.157615	0.829876	-0.0642772	retractor muscle.MR.1
NvADAM-like : NV2.20818	0	0	-0.121708	all.gastrodermis.gastrula.1
NvADAM-like : NV2.20818	0	0	-0.121708	all.gastrodermis.gastrula.2
NvADAM-like : NV2.20818	0.00145023	0.212314	-0.12118	all.gastrodermis.gastrula.3
NvADAM-like : NV2.20818	0	0	-0.121708	all.gastrodermis.early.1
NvADAM-like : NV2.20818	0	0	-0.121708	all.gastrodermis.early.2
NvADAM-like : NV2.20818	0	0	-0.121708	all.gastrodermis.CM
NvADAM-like : NV2.20818	0	0	-0.121708	all.gastrodermis.MR/PM
NvADAM-like : NV2.20818	0	0	-0.121708	all.gastrodermis.gastrodermis
NvADAM-like : NV2.20818	0	0	-0.121708	all.gastrodermis.pharyngeal
NvADAM-like : NV2.20818	0	0	-0.121708	all.gastrodermis.ImM
NvADAM-like : NV2.20818	0.00695523	0.146199	-0.119174	all.gastrodermis.non-muscle
NvADAM-like : NV2.20818	0.0220003	0.323625	-0.113692	all.gastrodermis.mesentery
NvADAM-like : NV2.20818	0	0	-0.121708	all.gastrodermis.neuron
NvADAM-like : NV2.20818	0.0567975	0.763359	-0.101013	all.gastrodermis.immune
NvADAM-like : NV2.20818	0	0	-0.121708	all.gastrodermis.gland
NvADAM-like : NV2.20818	0.0811615	0.75188	-0.092135	all.gastrodermis.ciliated
NvADAM-like : NV2.20818	0	0	-0.121708	all.ectoderm.apical organ
NvADAM-like : NV2.20818	0.00196553	0.0214454	-0.120992	all.ectoderm.early.ect.1
NvADAM-like : NV2.20818	0	0	-0.121708	all.ectoderm.early.ect.2
NvADAM-like : NV2.20818	0	0	-0.121708	all.ectoderm.early.ect.2b
NvADAM-like : NV2.20818	0	0	-0.121708	all.ectoderm.lip
NvADAM-like : NV2.20818	0.00722435	0.0425532	-0.119076	all.ectoderm.pharyng.
NvADAM-like : NV2.20818	0.00584529	0.0636132	-0.119578	all.ectoderm.epith.1
NvADAM-like : NV2.20818	0.00150785	0.0109206	-0.121159	all.ectoderm.epith.2
NvADAM-like : NV2.20818	0	0	-0.121708	all.ectoderm.epith.3
NvADAM-like : NV2.20818	0	0	-0.121708	all.ectoderm.epith.4
NvADAMTS-1 : NV2.22459	0.000877785	0.151745	-0.175466	pSC.PGC.Mitotic.1
NvADAMTS-1 : NV2.22459	0.00177198	0.223714	-0.126431	pSC.PGC.Mitotic.2
NvADAMTS-1 : NV2.22459	0.00132428	0.0637146	-0.150982	pSC.PGC.NPC
NvADAMTS-1 : NV2.22459	0	0	-0.223602	pSC.PGC.NPC.g
NvADAMTS-1 : NV2.22459	0	0	-0.223602	pSC.PGC.PGC
NvADAMTS-1 : NV2.22459	0	0	-0.223602	pSC.PGC.primary.oocyte
NvADAMTS-1 : NV2.22459	0	0	-0.223602	pSC.PGC.spermatagonia
NvADAMTS-1 : NV2.22459	0	0	-0.223602	pSC.PGC.maturing.sperm
NvADAMTS-1 : NV2.22459	0	0	-0.223602	pSC.PGC.maturing.sperm.2
NvADAMTS-1 : NV2.22459	0	0	-0.223602	neurogland.all.S1.L1
NvADAMTS-1 : NV2.22459	0	0	-0.223602	neurogland.all.N1.L1
NvADAMTS-1 : NV2.22459	0	0	-0.223602	neurogland.all.N1.L2
NvADAMTS-1 : NV2.22459	0	0	-0.223602	neurogland.all.N1.L3
NvADAMTS-1 : NV2.22459	0	0	-0.223602	neurogland.all.N1.g.early
NvADAMTS-1 : NV2.22459	0	0	-0.223602	neurogland.all.N1.g1
NvADAMTS-1 : NV2.22459	0	0	-0.223602	neurogland.all.N1.g2
NvADAMTS-1 : NV2.22459	0.030158	1.14943	1.43018	neurogland.all.N1.g3
NvADAMTS-1 : NV2.22459	0	0	-0.223602	neurogland.all.N1.g4
NvADAMTS-1 : NV2.22459	0	0	-0.223602	neurogland.all.N1.g5
NvADAMTS-1 : NV2.22459	0	0	-0.223602	neurogland.all.N1.early.1
NvADAMTS-1 : NV2.22459	0	0	-0.223602	neurogland.all.N1.early.2
NvADAMTS-1 : NV2.22459	0	0	-0.223602	neurogland.all.N1.1
NvADAMTS-1 : NV2.22459	0	0	-0.223602	neurogland.all.N1.2
NvADAMTS-1 : NV2.22459	0	0	-0.223602	neurogland.all.N1.3
NvADAMTS-1 : NV2.22459	0	0	-0.223602	neurogland.all.N1.4
NvADAMTS-1 : NV2.22459	0	0	-0.223602	neurogland.all.N1.5
NvADAMTS-1 : NV2.22459	0	0	-0.223602	neurogland.all.N1.6
NvADAMTS-1 : NV2.22459	0	0	-0.223602	neurogland.all.N1S.1
NvADAMTS-1 : NV2.22459	0	0	-0.223602	neurogland.all.N1S.2
NvADAMTS-1 : NV2.22459	0	0	-0.223602	neurogland.all.N1S.3
NvADAMTS-1 : NV2.22459	0	0	-0.223602	neurogland.all.N1S.4.early
NvADAMTS-1 : NV2.22459	0	0	-0.223602	neurogland.all.N1S.4
NvADAMTS-1 : NV2.22459	0	0	-0.223602	neurogland.all.NGD.early
NvADAMTS-1 : NV2.22459	0	0	-0.223602	neurogland.all.NGD.1
NvADAMTS-1 : NV2.22459	0.000364223	0.203666	-0.203629	neurogland.all.SGD.early
NvADAMTS-1 : NV2.22459	0	0	-0.223602	neurogland.all.S1.1
NvADAMTS-1 : NV2.22459	0	0	-0.223602	neurogland.all.S1.2
NvADAMTS-1 : NV2.22459	0	0	-0.223602	neurogland.all.S2.tll.1
NvADAMTS-1 : NV2.22459	0	0	-0.223602	neurogland.all.S2.tll.2
NvADAMTS-1 : NV2.22459	0	0	-0.223602	neurogland.all.S2.tll.3
NvADAMTS-1 : NV2.22459	0	0	-0.223602	neurogland.all.S2.tll.4
NvADAMTS-1 : NV2.22459	0.00743606	1.0989	0.184172	neurogland.all.GD.1
NvADAMTS-1 : NV2.22459	0	0	-0.223602	neurogland.all.GD.2
NvADAMTS-1 : NV2.22459	0	0	-0.223602	neurogland.all.GD.3
NvADAMTS-1 : NV2.22459	0	0	-0.223602	neurogland.all.GD.4
NvADAMTS-1 : NV2.22459	0	0	-0.223602	neurogland.all.GD.5
NvADAMTS-1 : NV2.22459	0	0	-0.223602	neurogland.all.S3
NvADAMTS-1 : NV2.22459	0.0402363	0.671141	1.98285	neurogland.all.N2.g1
NvADAMTS-1 : NV2.22459	0	0	-0.223602	neurogland.all.N2.1
NvADAMTS-1 : NV2.22459	0	0	-0.223602	neurogland.all.N2.2
NvADAMTS-1 : NV2.22459	0.00935121	0.42735	0.289193	neurogland.all.N2.3
NvADAMTS-1 : NV2.22459	0	0	-0.223602	neurogland.all.N2.4
NvADAMTS-1 : NV2.22459	0	0	-0.223602	neurogland.all.N2.5
NvADAMTS-1 : NV2.22459	0	0	-0.223602	neurogland.all.N2.6
NvADAMTS-1 : NV2.22459	0	0	-0.223602	neurogland.all.N2.7
NvADAMTS-1 : NV2.22459	0	0	-0.223602	neurogland.all.immune
NvADAMTS-1 : NV2.22459	0	0	-0.223602	gland.mucous.1.dev.aboral
NvADAMTS-1 : NV2.22459	0.00193334	0.78125	-0.117583	gland.mucous.2.dev
NvADAMTS-1 : NV2.22459	0	0	-0.223602	gland.mucous.3.dev
NvADAMTS-1 : NV2.22459	0	0	-0.223602	gland.mucous.4.dev
NvADAMTS-1 : NV2.22459	0	0	-0.223602	gland.mucous.5.adult
NvADAMTS-1 : NV2.22459	0	0	-0.223602	gland.mucous.6.adult
NvADAMTS-1 : NV2.22459	0.0486362	1.28205	2.44348	gland.mucous.7.adult
NvADAMTS-1 : NV2.22459	0.00873717	1.32701	0.255521	unchar.immune.1.early.gastrula
NvADAMTS-1 : NV2.22459	0	0	-0.223602	unchar.immune.2.mid.gastrula
NvADAMTS-1 : NV2.22459	0.00309938	0.195695	-0.0536401	unchar.immune.3.planula
NvADAMTS-1 : NV2.22459	0.00683527	0.12987	0.151226	unchar.immune.4.mature
NvADAMTS-1 : NV2.22459	0	0	-0.223602	cnidocyte.pSC
NvADAMTS-1 : NV2.22459	0.000260476	0.13587	-0.209318	cnidocyte.gast.1
NvADAMTS-1 : NV2.22459	0	0	-0.223602	cnidocyte.nem.2
NvADAMTS-1 : NV2.22459	0	0	-0.223602	cnidocyte.early
NvADAMTS-1 : NV2.22459	0	0	-0.223602	cnidocyte.nep.8
NvADAMTS-1 : NV2.22459	0	0	-0.223602	cnidocyte.planula.spir
NvADAMTS-1 : NV2.22459	0	0	-0.223602	cnidocyte.spirocyte
NvADAMTS-1 : NV2.22459	0	0	-0.223602	cnidocyte.planula.nem
NvADAMTS-1 : NV2.22459	0	0	-0.223602	cnidocyte.spirocyte.maturing
NvADAMTS-1 : NV2.22459	0	0	-0.223602	cnidocyte.maturing.1
NvADAMTS-1 : NV2.22459	0	0	-0.223602	cnidocyte.planula.mat
NvADAMTS-1 : NV2.22459	0	0	-0.223602	cnidocyte.nem.1
NvADAMTS-1 : NV2.22459	0.000482604	0.162734	-0.197137	cnidocyte.mature
NvADAMTS-1 : NV2.22459	0	0	-0.223602	retractor muscle.RM.1
NvADAMTS-1 : NV2.22459	0	0	-0.223602	retractor muscle.TR.2
NvADAMTS-1 : NV2.22459	0	0	-0.223602	retractor muscle.TR.1
NvADAMTS-1 : NV2.22459	0	0	-0.223602	retractor muscle.MR.1
NvADAMTS-1 : NV2.22459	0.0019762	1.2685	-0.115232	all.gastrodermis.gastrula.1
NvADAMTS-1 : NV2.22459	0	0	-0.223602	all.gastrodermis.gastrula.2
NvADAMTS-1 : NV2.22459	0.00179803	0.424628	-0.125002	all.gastrodermis.gastrula.3
NvADAMTS-1 : NV2.22459	0	0	-0.223602	all.gastrodermis.early.1
NvADAMTS-1 : NV2.22459	0.00130472	0.298805	-0.152054	all.gastrodermis.early.2
NvADAMTS-1 : NV2.22459	0.00116466	0.0798722	-0.159735	all.gastrodermis.CM
NvADAMTS-1 : NV2.22459	0	0	-0.223602	all.gastrodermis.MR/PM
NvADAMTS-1 : NV2.22459	0	0	-0.223602	all.gastrodermis.gastrodermis
NvADAMTS-1 : NV2.22459	0.00971651	0.0800641	0.309225	all.gastrodermis.pharyngeal
NvADAMTS-1 : NV2.22459	0.175707	5.97015	2.5	all.gastrodermis.ImM
NvADAMTS-1 : NV2.22459	0.0105483	0.146199	0.354836	all.gastrodermis.non-muscle
NvADAMTS-1 : NV2.22459	0.0154034	0.323625	0.621077	all.gastrodermis.mesentery
NvADAMTS-1 : NV2.22459	0	0	-0.223602	all.gastrodermis.neuron
NvADAMTS-1 : NV2.22459	0	0	-0.223602	all.gastrodermis.immune
NvADAMTS-1 : NV2.22459	0.0025049	0.487805	-0.0862395	all.gastrodermis.gland
NvADAMTS-1 : NV2.22459	0	0	-0.223602	all.gastrodermis.ciliated
NvADAMTS-1 : NV2.22459	0.00188875	0.290698	-0.120028	all.ectoderm.apical organ
NvADAMTS-1 : NV2.22459	0.0045433	0.943599	0.0255407	all.ectoderm.early.ect.1
NvADAMTS-1 : NV2.22459	0.00107193	0.174607	-0.16482	all.ectoderm.early.ect.2
NvADAMTS-1 : NV2.22459	0.00169814	0.0804829	-0.13048	all.ectoderm.early.ect.2b
NvADAMTS-1 : NV2.22459	0.000930072	0.253807	-0.172599	all.ectoderm.lip
NvADAMTS-1 : NV2.22459	0.0376486	0.957447	1.84095	all.ectoderm.pharyng.
NvADAMTS-1 : NV2.22459	0.00913653	0.127226	0.277421	all.ectoderm.epith.1
NvADAMTS-1 : NV2.22459	0.00256642	0.120127	-0.0828662	all.ectoderm.epith.2
NvADAMTS-1 : NV2.22459	0.00419211	0.114811	0.00628224	all.ectoderm.epith.3
NvADAMTS-1 : NV2.22459	0.00322634	0.0618812	-0.0466779	all.ectoderm.epith.4
NvADAMTS-10 : NV2.21229	0.00102899	0.151745	-0.140083	pSC.PGC.Mitotic.1
NvADAMTS-10 : NV2.21229	0	0	-0.142028	pSC.PGC.Mitotic.2
NvADAMTS-10 : NV2.21229	0.00957514	0.286716	-0.123928	pSC.PGC.NPC
NvADAMTS-10 : NV2.21229	0	0	-0.142028	pSC.PGC.NPC.g
NvADAMTS-10 : NV2.21229	0.0213254	2.17391	-0.101718	pSC.PGC.PGC
NvADAMTS-10 : NV2.21229	0	0	-0.142028	pSC.PGC.primary.oocyte
NvADAMTS-10 : NV2.21229	0	0	-0.142028	pSC.PGC.spermatagonia
NvADAMTS-10 : NV2.21229	0.00804259	0.434783	-0.126825	pSC.PGC.maturing.sperm
NvADAMTS-10 : NV2.21229	0	0	-0.142028	pSC.PGC.maturing.sperm.2
NvADAMTS-10 : NV2.21229	2.56428	55.0562	2.5	neurogland.all.S1.L1
NvADAMTS-10 : NV2.21229	0	0	-0.142028	neurogland.all.N1.L1
NvADAMTS-10 : NV2.21229	0	0	-0.142028	neurogland.all.N1.L2
NvADAMTS-10 : NV2.21229	0.0729528	5.2356	-0.00413015	neurogland.all.N1.L3
NvADAMTS-10 : NV2.21229	0.0104317	1.53846	-0.122309	neurogland.all.N1.g.early
NvADAMTS-10 : NV2.21229	0.00449802	0.714286	-0.133525	neurogland.all.N1.g1
NvADAMTS-10 : NV2.21229	0	0	-0.142028	neurogland.all.N1.g2
NvADAMTS-10 : NV2.21229	0	0	-0.142028	neurogland.all.N1.g3
NvADAMTS-10 : NV2.21229	0.0110306	1.08696	-0.121177	neurogland.all.N1.g4
NvADAMTS-10 : NV2.21229	0	0	-0.142028	neurogland.all.N1.g5
NvADAMTS-10 : NV2.21229	0	0	-0.142028	neurogland.all.N1.early.1
NvADAMTS-10 : NV2.21229	0.00178366	0.315457	-0.138656	neurogland.all.N1.early.2
NvADAMTS-10 : NV2.21229	0	0	-0.142028	neurogland.all.N1.1
NvADAMTS-10 : NV2.21229	0	0	-0.142028	neurogland.all.N1.2
NvADAMTS-10 : NV2.21229	0.0577206	0.46729	-0.0329225	neurogland.all.N1.3
NvADAMTS-10 : NV2.21229	0.0175431	1.72414	-0.108867	neurogland.all.N1.4
NvADAMTS-10 : NV2.21229	0	0	-0.142028	neurogland.all.N1.5
NvADAMTS-10 : NV2.21229	0	0	-0.142028	neurogland.all.N1.6
NvADAMTS-10 : NV2.21229	0	0	-0.142028	neurogland.all.N1S.1
NvADAMTS-10 : NV2.21229	4.94771	17.7419	2.5	neurogland.all.N1S.2
NvADAMTS-10 : NV2.21229	0	0	-0.142028	neurogland.all.N1S.3
NvADAMTS-10 : NV2.21229	0	0	-0.142028	neurogland.all.N1S.4.early
NvADAMTS-10 : NV2.21229	0.00754196	0.995025	-0.127772	neurogland.all.N1S.4
NvADAMTS-10 : NV2.21229	0.0853201	3.07692	0.0192468	neurogland.all.NGD.early
NvADAMTS-10 : NV2.21229	0	0	-0.142028	neurogland.all.NGD.1
NvADAMTS-10 : NV2.21229	0.0123374	1.222	-0.118707	neurogland.all.SGD.early
NvADAMTS-10 : NV2.21229	0.0633097	2.34742	-0.0223579	neurogland.all.S1.1
NvADAMTS-10 : NV2.21229	0.0223921	0.460829	-0.0997014	neurogland.all.S1.2
NvADAMTS-10 : NV2.21229	0	0	-0.142028	neurogland.all.S2.tll.1
NvADAMTS-10 : NV2.21229	0	0	-0.142028	neurogland.all.S2.tll.2
NvADAMTS-10 : NV2.21229	0	0	-0.142028	neurogland.all.S2.tll.3
NvADAMTS-10 : NV2.21229	0	0	-0.142028	neurogland.all.S2.tll.4
NvADAMTS-10 : NV2.21229	0.0100891	1.0989	-0.122957	neurogland.all.GD.1
NvADAMTS-10 : NV2.21229	0	0	-0.142028	neurogland.all.GD.2
NvADAMTS-10 : NV2.21229	0	0	-0.142028	neurogland.all.GD.3
NvADAMTS-10 : NV2.21229	0	0	-0.142028	neurogland.all.GD.4
NvADAMTS-10 : NV2.21229	0	0	-0.142028	neurogland.all.GD.5
NvADAMTS-10 : NV2.21229	0	0	-0.142028	neurogland.all.S3
NvADAMTS-10 : NV2.21229	0	0	-0.142028	neurogland.all.N2.g1
NvADAMTS-10 : NV2.21229	0.0408497	0.520833	-0.0648124	neurogland.all.N2.1
NvADAMTS-10 : NV2.21229	0	0	-0.142028	neurogland.all.N2.2
NvADAMTS-10 : NV2.21229	0	0	-0.142028	neurogland.all.N2.3
NvADAMTS-10 : NV2.21229	0	0	-0.142028	neurogland.all.N2.4
NvADAMTS-10 : NV2.21229	0	0	-0.142028	neurogland.all.N2.5
NvADAMTS-10 : NV2.21229	0	0	-0.142028	neurogland.all.N2.6
NvADAMTS-10 : NV2.21229	0	0	-0.142028	neurogland.all.N2.7
NvADAMTS-10 : NV2.21229	0.219713	1.5873	0.27328	neurogland.all.immune
NvADAMTS-10 : NV2.21229	0	0	-0.142028	gland.mucous.1.dev.aboral
NvADAMTS-10 : NV2.21229	0	0	-0.142028	gland.mucous.2.dev
NvADAMTS-10 : NV2.21229	0	0	-0.142028	gland.mucous.3.dev
NvADAMTS-10 : NV2.21229	0	0	-0.142028	gland.mucous.4.dev
NvADAMTS-10 : NV2.21229	0	0	-0.142028	gland.mucous.5.adult
NvADAMTS-10 : NV2.21229	0	0	-0.142028	gland.mucous.6.adult
NvADAMTS-10 : NV2.21229	0	0	-0.142028	gland.mucous.7.adult
NvADAMTS-10 : NV2.21229	0	0	-0.142028	unchar.immune.1.early.gastrula
NvADAMTS-10 : NV2.21229	0.0034275	0.486618	-0.135549	unchar.immune.2.mid.gastrula
NvADAMTS-10 : NV2.21229	0.00295909	0.391389	-0.136434	unchar.immune.3.planula
NvADAMTS-10 : NV2.21229	0.0159044	0.25974	-0.111965	unchar.immune.4.mature
NvADAMTS-10 : NV2.21229	0	0	-0.142028	cnidocyte.pSC
NvADAMTS-10 : NV2.21229	0.00156095	0.271739	-0.139077	cnidocyte.gast.1
NvADAMTS-10 : NV2.21229	0	0	-0.142028	cnidocyte.nem.2
NvADAMTS-10 : NV2.21229	0.000544428	0.362319	-0.140999	cnidocyte.early
NvADAMTS-10 : NV2.21229	0	0	-0.142028	cnidocyte.nep.8
NvADAMTS-10 : NV2.21229	0	0	-0.142028	cnidocyte.planula.spir
NvADAMTS-10 : NV2.21229	0	0	-0.142028	cnidocyte.spirocyte
NvADAMTS-10 : NV2.21229	0	0	-0.142028	cnidocyte.planula.nem
NvADAMTS-10 : NV2.21229	0	0	-0.142028	cnidocyte.spirocyte.maturing
NvADAMTS-10 : NV2.21229	0	0	-0.142028	cnidocyte.maturing.1
NvADAMTS-10 : NV2.21229	0	0	-0.142028	cnidocyte.planula.mat
NvADAMTS-10 : NV2.21229	0	0	-0.142028	cnidocyte.nem.1
NvADAMTS-10 : NV2.21229	0	0	-0.142028	cnidocyte.mature
NvADAMTS-10 : NV2.21229	0.00643612	0.298507	-0.129862	retractor muscle.RM.1
NvADAMTS-10 : NV2.21229	0	0	-0.142028	retractor muscle.TR.2
NvADAMTS-10 : NV2.21229	0	0	-0.142028	retractor muscle.TR.1
NvADAMTS-10 : NV2.21229	0	0	-0.142028	retractor muscle.MR.1
NvADAMTS-10 : NV2.21229	0.00322829	1.2685	-0.135925	all.gastrodermis.gastrula.1
NvADAMTS-10 : NV2.21229	0	0	-0.142028	all.gastrodermis.gastrula.2
NvADAMTS-10 : NV2.21229	0	0	-0.142028	all.gastrodermis.gastrula.3
NvADAMTS-10 : NV2.21229	0	0	-0.142028	all.gastrodermis.early.1
NvADAMTS-10 : NV2.21229	0.00859539	0.199203	-0.12578	all.gastrodermis.early.2
NvADAMTS-10 : NV2.21229	0	0	-0.142028	all.gastrodermis.CM
NvADAMTS-10 : NV2.21229	0.0163079	0.142857	-0.111202	all.gastrodermis.MR/PM
NvADAMTS-10 : NV2.21229	0	0	-0.142028	all.gastrodermis.gastrodermis
NvADAMTS-10 : NV2.21229	0	0	-0.142028	all.gastrodermis.pharyngeal
NvADAMTS-10 : NV2.21229	0	0	-0.142028	all.gastrodermis.ImM
NvADAMTS-10 : NV2.21229	0.00252677	0.146199	-0.137251	all.gastrodermis.non-muscle
NvADAMTS-10 : NV2.21229	0	0	-0.142028	all.gastrodermis.mesentery
NvADAMTS-10 : NV2.21229	0	0	-0.142028	all.gastrodermis.neuron
NvADAMTS-10 : NV2.21229	0	0	-0.142028	all.gastrodermis.immune
NvADAMTS-10 : NV2.21229	0.00271425	0.487805	-0.136897	all.gastrodermis.gland
NvADAMTS-10 : NV2.21229	0	0	-0.142028	all.gastrodermis.ciliated
NvADAMTS-10 : NV2.21229	0.00315017	0.145349	-0.136073	all.ectoderm.apical organ
NvADAMTS-10 : NV2.21229	0.000163756	0.0214454	-0.141718	all.ectoderm.early.ect.1
NvADAMTS-10 : NV2.21229	0.000144787	0.0249439	-0.141754	all.ectoderm.early.ect.2
NvADAMTS-10 : NV2.21229	0.00311949	0.0402414	-0.136131	all.ectoderm.early.ect.2b
NvADAMTS-10 : NV2.21229	0	0	-0.142028	all.ectoderm.lip
NvADAMTS-10 : NV2.21229	0.0018945	0.0425532	-0.138447	all.ectoderm.pharyng.
NvADAMTS-10 : NV2.21229	0.000456992	0.0127226	-0.141164	all.ectoderm.epith.1
NvADAMTS-10 : NV2.21229	0.00147912	0.0436824	-0.139232	all.ectoderm.epith.2
NvADAMTS-10 : NV2.21229	0	0	-0.142028	all.ectoderm.epith.3
NvADAMTS-10 : NV2.21229	0.00107395	0.0618812	-0.139998	all.ectoderm.epith.4
NvADAMTS-11 : NV2.21230	0.0205951	0.986343	-0.101252	pSC.PGC.Mitotic.1
NvADAMTS-11 : NV2.21230	0.0113713	0.671141	-0.101939	pSC.PGC.Mitotic.2
NvADAMTS-11 : NV2.21230	0.0272681	1.36986	-0.100754	pSC.PGC.NPC
NvADAMTS-11 : NV2.21230	0.0159708	0.759494	-0.101597	pSC.PGC.NPC.g
NvADAMTS-11 : NV2.21230	0.0102225	2.17391	-0.102025	pSC.PGC.PGC
NvADAMTS-11 : NV2.21230	0	0	-0.102787	pSC.PGC.primary.oocyte
NvADAMTS-11 : NV2.21230	0.00240561	0.1287	-0.102608	pSC.PGC.spermatagonia
NvADAMTS-11 : NV2.21230	0	0	-0.102787	pSC.PGC.maturing.sperm
NvADAMTS-11 : NV2.21230	0	0	-0.102787	pSC.PGC.maturing.sperm.2
NvADAMTS-11 : NV2.21230	140.717	84.2697	2.5	neurogland.all.S1.L1
NvADAMTS-11 : NV2.21230	0.113473	4.25532	-0.0943262	neurogland.all.N1.L1
NvADAMTS-11 : NV2.21230	0.106088	5.88235	-0.0948769	neurogland.all.N1.L2
NvADAMTS-11 : NV2.21230	2.88204	54.9738	0.112113	neurogland.all.N1.L3
NvADAMTS-11 : NV2.21230	0.214509	7.69231	-0.0867925	neurogland.all.N1.g.early
NvADAMTS-11 : NV2.21230	0.0359858	1.42857	-0.100104	neurogland.all.N1.g1
NvADAMTS-11 : NV2.21230	0	0	-0.102787	neurogland.all.N1.g2
NvADAMTS-11 : NV2.21230	0.0486637	0.766284	-0.0991588	neurogland.all.N1.g3
NvADAMTS-11 : NV2.21230	0.014047	1.08696	-0.10174	neurogland.all.N1.g4
NvADAMTS-11 : NV2.21230	0	0	-0.102787	neurogland.all.N1.g5
NvADAMTS-11 : NV2.21230	0	0	-0.102787	neurogland.all.N1.early.1
NvADAMTS-11 : NV2.21230	0.0918103	1.89274	-0.0959415	neurogland.all.N1.early.2
NvADAMTS-11 : NV2.21230	0.102395	1.3289	-0.0951523	neurogland.all.N1.1
NvADAMTS-11 : NV2.21230	0.0201706	0.909091	-0.101283	neurogland.all.N1.2
NvADAMTS-11 : NV2.21230	0.0600188	0.934579	-0.0983121	neurogland.all.N1.3
NvADAMTS-11 : NV2.21230	0.0877156	1.72414	-0.0962469	neurogland.all.N1.4
NvADAMTS-11 : NV2.21230	0	0	-0.102787	neurogland.all.N1.5
NvADAMTS-11 : NV2.21230	0	0	-0.102787	neurogland.all.N1.6
NvADAMTS-11 : NV2.21230	0.0737871	0.512821	-0.0972854	neurogland.all.N1S.1
NvADAMTS-11 : NV2.21230	0.0241664	0.806452	-0.100985	neurogland.all.N1S.2
NvADAMTS-11 : NV2.21230	0	0	-0.102787	neurogland.all.N1S.3
NvADAMTS-11 : NV2.21230	0	0	-0.102787	neurogland.all.N1S.4.early
NvADAMTS-11 : NV2.21230	0.552856	3.48259	-0.0615635	neurogland.all.N1S.4
NvADAMTS-11 : NV2.21230	0.0341779	1.53846	-0.100239	neurogland.all.NGD.early
NvADAMTS-11 : NV2.21230	0	0	-0.102787	neurogland.all.NGD.1
NvADAMTS-11 : NV2.21230	0.40445	5.70265	-0.0726294	neurogland.all.SGD.early
NvADAMTS-11 : NV2.21230	1.29472	6.10329	-0.00624615	neurogland.all.S1.1
NvADAMTS-11 : NV2.21230	0.024617	0.460829	-0.100952	neurogland.all.S1.2
NvADAMTS-11 : NV2.21230	0	0	-0.102787	neurogland.all.S2.tll.1
NvADAMTS-11 : NV2.21230	0.00224235	0.540541	-0.10262	neurogland.all.S2.tll.2
NvADAMTS-11 : NV2.21230	0	0	-0.102787	neurogland.all.S2.tll.3
NvADAMTS-11 : NV2.21230	0	0	-0.102787	neurogland.all.S2.tll.4
NvADAMTS-11 : NV2.21230	0	0	-0.102787	neurogland.all.GD.1
NvADAMTS-11 : NV2.21230	0.0529978	0.966184	-0.0988356	neurogland.all.GD.2
NvADAMTS-11 : NV2.21230	0.00686549	0.588235	-0.102275	neurogland.all.GD.3
NvADAMTS-11 : NV2.21230	0.0562973	0.990099	-0.0985896	neurogland.all.GD.4
NvADAMTS-11 : NV2.21230	0	0	-0.102787	neurogland.all.GD.5
NvADAMTS-11 : NV2.21230	0.00920597	0.763359	-0.102101	neurogland.all.S3
NvADAMTS-11 : NV2.21230	0	0	-0.102787	neurogland.all.N2.g1
NvADAMTS-11 : NV2.21230	0.129279	2.08333	-0.0931477	neurogland.all.N2.1
NvADAMTS-11 : NV2.21230	0.207998	0.671141	-0.0872779	neurogland.all.N2.2
NvADAMTS-11 : NV2.21230	0.00975689	0.854701	-0.10206	neurogland.all.N2.3
NvADAMTS-11 : NV2.21230	0	0	-0.102787	neurogland.all.N2.4
NvADAMTS-11 : NV2.21230	0	0	-0.102787	neurogland.all.N2.5
NvADAMTS-11 : NV2.21230	0	0	-0.102787	neurogland.all.N2.6
NvADAMTS-11 : NV2.21230	0	0	-0.102787	neurogland.all.N2.7
NvADAMTS-11 : NV2.21230	0.261161	5.55556	-0.0833138	neurogland.all.immune
NvADAMTS-11 : NV2.21230	0.0500364	3.8943	-0.0990564	gland.mucous.1.dev.aboral
NvADAMTS-11 : NV2.21230	0.0466708	4.29688	-0.0993074	gland.mucous.2.dev
NvADAMTS-11 : NV2.21230	0.113464	7.55287	-0.0943269	gland.mucous.3.dev
NvADAMTS-11 : NV2.21230	0.148295	2.77778	-0.0917297	gland.mucous.4.dev
NvADAMTS-11 : NV2.21230	0.0083823	0.621118	-0.102162	gland.mucous.5.adult
NvADAMTS-11 : NV2.21230	0.0228647	0.719424	-0.101082	gland.mucous.6.adult
NvADAMTS-11 : NV2.21230	0	0	-0.102787	gland.mucous.7.adult
NvADAMTS-11 : NV2.21230	0.028297	1.99052	-0.100677	unchar.immune.1.early.gastrula
NvADAMTS-11 : NV2.21230	0.266517	15.0852	-0.0829145	unchar.immune.2.mid.gastrula
NvADAMTS-11 : NV2.21230	0.0648246	3.5225	-0.0979537	unchar.immune.3.planula
NvADAMTS-11 : NV2.21230	0.0585767	1.55844	-0.0984196	unchar.immune.4.mature
NvADAMTS-11 : NV2.21230	0.0108608	0.776699	-0.101978	cnidocyte.pSC
NvADAMTS-11 : NV2.21230	0.0430636	2.03804	-0.0995763	cnidocyte.gast.1
NvADAMTS-11 : NV2.21230	0.0333646	0.554529	-0.1003	cnidocyte.nem.2
NvADAMTS-11 : NV2.21230	0.0385359	3.01932	-0.099914	cnidocyte.early
NvADAMTS-11 : NV2.21230	0	0	-0.102787	cnidocyte.nep.8
NvADAMTS-11 : NV2.21230	0.0655436	8.40336	-0.0979001	cnidocyte.planula.spir
NvADAMTS-11 : NV2.21230	0	0	-0.102787	cnidocyte.spirocyte
NvADAMTS-11 : NV2.21230	0	0	-0.102787	cnidocyte.planula.nem
NvADAMTS-11 : NV2.21230	0	0	-0.102787	cnidocyte.spirocyte.maturing
NvADAMTS-11 : NV2.21230	0.0190768	0.91954	-0.101365	cnidocyte.maturing.1
NvADAMTS-11 : NV2.21230	0.0184178	2.77778	-0.101414	cnidocyte.planula.mat
NvADAMTS-11 : NV2.21230	0.0410168	1.51771	-0.099729	cnidocyte.nem.1
NvADAMTS-11 : NV2.21230	0.00716678	0.488202	-0.102253	cnidocyte.mature
NvADAMTS-11 : NV2.21230	0	0	-0.102787	retractor muscle.RM.1
NvADAMTS-11 : NV2.21230	0	0	-0.102787	retractor muscle.TR.2
NvADAMTS-11 : NV2.21230	0	0	-0.102787	retractor muscle.TR.1
NvADAMTS-11 : NV2.21230	0	0	-0.102787	retractor muscle.MR.1
NvADAMTS-11 : NV2.21230	0.0458674	9.09091	-0.0993673	all.gastrodermis.gastrula.1
NvADAMTS-11 : NV2.21230	0.0133046	0.315457	-0.101795	all.gastrodermis.gastrula.2
NvADAMTS-11 : NV2.21230	0.0242164	4.4586	-0.100982	all.gastrodermis.gastrula.3
NvADAMTS-11 : NV2.21230	0.0763148	0.999286	-0.097097	all.gastrodermis.early.1
NvADAMTS-11 : NV2.21230	0.0155324	3.08765	-0.101629	all.gastrodermis.early.2
NvADAMTS-11 : NV2.21230	0.026482	0.479233	-0.100813	all.gastrodermis.CM
NvADAMTS-11 : NV2.21230	0.0329878	1.85714	-0.100328	all.gastrodermis.MR/PM
NvADAMTS-11 : NV2.21230	0.841693	13.5503	-0.0400262	all.gastrodermis.gastrodermis
NvADAMTS-11 : NV2.21230	0.0662728	1.28102	-0.0978457	all.gastrodermis.pharyngeal
NvADAMTS-11 : NV2.21230	0.224072	5.67164	-0.0860794	all.gastrodermis.ImM
NvADAMTS-11 : NV2.21230	0.088252	1.75439	-0.0962069	all.gastrodermis.non-muscle
NvADAMTS-11 : NV2.21230	0.51882	7.44337	-0.0641014	all.gastrodermis.mesentery
NvADAMTS-11 : NV2.21230	0.0797995	1.1976	-0.0968371	all.gastrodermis.neuron
NvADAMTS-11 : NV2.21230	0.175311	1.52672	-0.0897153	all.gastrodermis.immune
NvADAMTS-11 : NV2.21230	0.00865953	0.97561	-0.102142	all.gastrodermis.gland
NvADAMTS-11 : NV2.21230	0.374506	11.2782	-0.0748622	all.gastrodermis.ciliated
NvADAMTS-11 : NV2.21230	0.074964	4.65116	-0.0971977	all.ectoderm.apical organ
NvADAMTS-11 : NV2.21230	0.0208412	3.64572	-0.101233	all.ectoderm.early.ect.1
NvADAMTS-11 : NV2.21230	0.0164712	1.89573	-0.101559	all.ectoderm.early.ect.2
NvADAMTS-11 : NV2.21230	0.0177187	0.442656	-0.101466	all.ectoderm.early.ect.2b
NvADAMTS-11 : NV2.21230	0.00834543	1.52284	-0.102165	all.ectoderm.lip
NvADAMTS-11 : NV2.21230	0.0142923	0.319149	-0.101722	all.ectoderm.pharyng.
NvADAMTS-11 : NV2.21230	0.0356984	0.43257	-0.100126	all.ectoderm.epith.1
NvADAMTS-11 : NV2.21230	0.0163354	0.458666	-0.101569	all.ectoderm.epith.2
NvADAMTS-11 : NV2.21230	0.00209742	0.153081	-0.102631	all.ectoderm.epith.3
NvADAMTS-11 : NV2.21230	0.00335539	0.123762	-0.102537	all.ectoderm.epith.4
NvADAMTS-12 : NV2.21636	0.00388529	0.151745	-0.150157	pSC.PGC.Mitotic.1
NvADAMTS-12 : NV2.21636	0.00990672	0.33557	-0.147651	pSC.PGC.Mitotic.2
NvADAMTS-12 : NV2.21636	0.00671388	0.318573	-0.14898	pSC.PGC.NPC
NvADAMTS-12 : NV2.21636	0.00308252	0.168776	-0.150491	pSC.PGC.NPC.g
NvADAMTS-12 : NV2.21636	0	0	-0.151774	pSC.PGC.PGC
NvADAMTS-12 : NV2.21636	0	0	-0.151774	pSC.PGC.primary.oocyte
NvADAMTS-12 : NV2.21636	0	0	-0.151774	pSC.PGC.spermatagonia
NvADAMTS-12 : NV2.21636	0	0	-0.151774	pSC.PGC.maturing.sperm
NvADAMTS-12 : NV2.21636	0	0	-0.151774	pSC.PGC.maturing.sperm.2
NvADAMTS-12 : NV2.21636	3.81909	24.7191	1.43745	neurogland.all.S1.L1
NvADAMTS-12 : NV2.21636	0	0	-0.151774	neurogland.all.N1.L1
NvADAMTS-12 : NV2.21636	0	0	-0.151774	neurogland.all.N1.L2
NvADAMTS-12 : NV2.21636	0.144491	8.37696	-0.0916474	neurogland.all.N1.L3
NvADAMTS-12 : NV2.21636	0	0	-0.151774	neurogland.all.N1.g.early
NvADAMTS-12 : NV2.21636	0	0	-0.151774	neurogland.all.N1.g1
NvADAMTS-12 : NV2.21636	0	0	-0.151774	neurogland.all.N1.g2
NvADAMTS-12 : NV2.21636	0.0157801	0.383142	-0.145207	neurogland.all.N1.g3
NvADAMTS-12 : NV2.21636	0	0	-0.151774	neurogland.all.N1.g4
NvADAMTS-12 : NV2.21636	0.552442	3.50877	0.0781114	neurogland.all.N1.g5
NvADAMTS-12 : NV2.21636	0.0363112	1.04712	-0.136664	neurogland.all.N1.early.1
NvADAMTS-12 : NV2.21636	0.0017649	0.315457	-0.151039	neurogland.all.N1.early.2
NvADAMTS-12 : NV2.21636	0	0	-0.151774	neurogland.all.N1.1
NvADAMTS-12 : NV2.21636	0.0440878	0.909091	-0.133428	neurogland.all.N1.2
NvADAMTS-12 : NV2.21636	0.019456	0.934579	-0.143677	neurogland.all.N1.3
NvADAMTS-12 : NV2.21636	0.165214	3.44828	-0.0830238	neurogland.all.N1.4
NvADAMTS-12 : NV2.21636	0.0676429	2.7027	-0.123626	neurogland.all.N1.5
NvADAMTS-12 : NV2.21636	0	0	-0.151774	neurogland.all.N1.6
NvADAMTS-12 : NV2.21636	0.026984	1.02564	-0.140545	neurogland.all.N1S.1
NvADAMTS-12 : NV2.21636	0.0587928	0.806452	-0.127308	neurogland.all.N1S.2
NvADAMTS-12 : NV2.21636	0.164809	4.34783	-0.0831927	neurogland.all.N1S.3
NvADAMTS-12 : NV2.21636	0.0192889	2.94118	-0.143747	neurogland.all.N1S.4.early
NvADAMTS-12 : NV2.21636	0.0889135	1.99005	-0.114775	neurogland.all.N1S.4
NvADAMTS-12 : NV2.21636	0	0	-0.151774	neurogland.all.NGD.early
NvADAMTS-12 : NV2.21636	0	0	-0.151774	neurogland.all.NGD.1
NvADAMTS-12 : NV2.21636	0.295375	8.14664	-0.0288606	neurogland.all.SGD.early
NvADAMTS-12 : NV2.21636	10.0535	49.7653	2.5	neurogland.all.S1.1
NvADAMTS-12 : NV2.21636	22.9674	64.5161	2.5	neurogland.all.S1.2
NvADAMTS-12 : NV2.21636	0.0101864	0.724638	-0.147535	neurogland.all.S2.tll.1
NvADAMTS-12 : NV2.21636	0.00179177	0.540541	-0.151028	neurogland.all.S2.tll.2
NvADAMTS-12 : NV2.21636	0.112962	1.26582	-0.104767	neurogland.all.S2.tll.3
NvADAMTS-12 : NV2.21636	0	0	-0.151774	neurogland.all.S2.tll.4
NvADAMTS-12 : NV2.21636	0	0	-0.151774	neurogland.all.GD.1
NvADAMTS-12 : NV2.21636	0.0139461	0.483092	-0.14597	neurogland.all.GD.2
NvADAMTS-12 : NV2.21636	0.0685867	1.17647	-0.123233	neurogland.all.GD.3
NvADAMTS-12 : NV2.21636	0.0117199	0.49505	-0.146897	neurogland.all.GD.4
NvADAMTS-12 : NV2.21636	0	0	-0.151774	neurogland.all.GD.5
NvADAMTS-12 : NV2.21636	0	0	-0.151774	neurogland.all.S3
NvADAMTS-12 : NV2.21636	0.0261348	0.671141	-0.140898	neurogland.all.N2.g1
NvADAMTS-12 : NV2.21636	0	0	-0.151774	neurogland.all.N2.1
NvADAMTS-12 : NV2.21636	0	0	-0.151774	neurogland.all.N2.2
NvADAMTS-12 : NV2.21636	0.0607772	0.42735	-0.126483	neurogland.all.N2.3
NvADAMTS-12 : NV2.21636	0.0268632	1.3245	-0.140595	neurogland.all.N2.4
NvADAMTS-12 : NV2.21636	0	0	-0.151774	neurogland.all.N2.5
NvADAMTS-12 : NV2.21636	0	0	-0.151774	neurogland.all.N2.6
NvADAMTS-12 : NV2.21636	0	0	-0.151774	neurogland.all.N2.7
NvADAMTS-12 : NV2.21636	0.641763	2.38095	0.11528	neurogland.all.immune
NvADAMTS-12 : NV2.21636	0.00135967	0.417246	-0.151208	gland.mucous.1.dev.aboral
NvADAMTS-12 : NV2.21636	0	0	-0.151774	gland.mucous.2.dev
NvADAMTS-12 : NV2.21636	0.0238594	2.41692	-0.141845	gland.mucous.3.dev
NvADAMTS-12 : NV2.21636	0	0	-0.151774	gland.mucous.4.dev
NvADAMTS-12 : NV2.21636	0.0343543	0.828157	-0.137478	gland.mucous.5.adult
NvADAMTS-12 : NV2.21636	0.0558843	1.19904	-0.128519	gland.mucous.6.adult
NvADAMTS-12 : NV2.21636	0	0	-0.151774	gland.mucous.7.adult
NvADAMTS-12 : NV2.21636	0.000189308	0.0947867	-0.151695	unchar.immune.1.early.gastrula
NvADAMTS-12 : NV2.21636	0	0	-0.151774	unchar.immune.2.mid.gastrula
NvADAMTS-12 : NV2.21636	0	0	-0.151774	unchar.immune.3.planula
NvADAMTS-12 : NV2.21636	0.0297479	0.25974	-0.139395	unchar.immune.4.mature
NvADAMTS-12 : NV2.21636	0.00199604	0.194175	-0.150943	cnidocyte.pSC
NvADAMTS-12 : NV2.21636	0.000298064	0.13587	-0.15165	cnidocyte.gast.1
NvADAMTS-12 : NV2.21636	0.0116373	0.554529	-0.146931	cnidocyte.nem.2
NvADAMTS-12 : NV2.21636	0.000415484	0.120773	-0.151601	cnidocyte.early
NvADAMTS-12 : NV2.21636	0.0496826	1.45631	-0.131099	cnidocyte.nep.8
NvADAMTS-12 : NV2.21636	0	0	-0.151774	cnidocyte.planula.spir
NvADAMTS-12 : NV2.21636	0	0	-0.151774	cnidocyte.spirocyte
NvADAMTS-12 : NV2.21636	0	0	-0.151774	cnidocyte.planula.nem
NvADAMTS-12 : NV2.21636	0	0	-0.151774	cnidocyte.spirocyte.maturing
NvADAMTS-12 : NV2.21636	0	0	-0.151774	cnidocyte.maturing.1
NvADAMTS-12 : NV2.21636	0	0	-0.151774	cnidocyte.planula.mat
NvADAMTS-12 : NV2.21636	0.00116273	0.168634	-0.15129	cnidocyte.nem.1
NvADAMTS-12 : NV2.21636	0.0115654	0.406835	-0.146961	cnidocyte.mature
NvADAMTS-12 : NV2.21636	0.0261365	1.49254	-0.140898	retractor muscle.RM.1
NvADAMTS-12 : NV2.21636	0	0	-0.151774	retractor muscle.TR.2
NvADAMTS-12 : NV2.21636	0.0261128	0.970874	-0.140907	retractor muscle.TR.1
NvADAMTS-12 : NV2.21636	0.00334897	0.414938	-0.15038	retractor muscle.MR.1
NvADAMTS-12 : NV2.21636	0.00120028	0.211416	-0.151274	all.gastrodermis.gastrula.1
NvADAMTS-12 : NV2.21636	0	0	-0.151774	all.gastrodermis.gastrula.2
NvADAMTS-12 : NV2.21636	0	0	-0.151774	all.gastrodermis.gastrula.3
NvADAMTS-12 : NV2.21636	0.027575	0.356888	-0.140299	all.gastrodermis.early.1
NvADAMTS-12 : NV2.21636	0.0070842	0.199203	-0.148826	all.gastrodermis.early.2
NvADAMTS-12 : NV2.21636	0	0	-0.151774	all.gastrodermis.CM
NvADAMTS-12 : NV2.21636	0.00777809	0.571429	-0.148537	all.gastrodermis.MR/PM
NvADAMTS-12 : NV2.21636	0.0825718	0.681302	-0.117413	all.gastrodermis.gastrodermis
NvADAMTS-12 : NV2.21636	0.0157116	0.480384	-0.145236	all.gastrodermis.pharyngeal
NvADAMTS-12 : NV2.21636	0.0600255	1.79104	-0.126796	all.gastrodermis.ImM
NvADAMTS-12 : NV2.21636	0.0170814	0.584795	-0.144666	all.gastrodermis.non-muscle
NvADAMTS-12 : NV2.21636	0	0	-0.151774	all.gastrodermis.mesentery
NvADAMTS-12 : NV2.21636	0	0	-0.151774	all.gastrodermis.neuron
NvADAMTS-12 : NV2.21636	0	0	-0.151774	all.gastrodermis.immune
NvADAMTS-12 : NV2.21636	0	0	-0.151774	all.gastrodermis.gland
NvADAMTS-12 : NV2.21636	0	0	-0.151774	all.gastrodermis.ciliated
NvADAMTS-12 : NV2.21636	0.00154036	0.145349	-0.151133	all.ectoderm.apical organ
NvADAMTS-12 : NV2.21636	0.000621876	0.0857817	-0.151515	all.ectoderm.early.ect.1
NvADAMTS-12 : NV2.21636	0	0	-0.151774	all.ectoderm.early.ect.2
NvADAMTS-12 : NV2.21636	0	0	-0.151774	all.ectoderm.early.ect.2b
NvADAMTS-12 : NV2.21636	0	0	-0.151774	all.ectoderm.lip
NvADAMTS-12 : NV2.21636	0.0376029	0.734043	-0.136126	all.ectoderm.pharyng.
NvADAMTS-12 : NV2.21636	0.00375946	0.0508906	-0.150209	all.ectoderm.epith.1
NvADAMTS-12 : NV2.21636	0.0066768	0.163809	-0.148995	all.ectoderm.epith.2
NvADAMTS-12 : NV2.21636	0.0138454	0.535783	-0.146012	all.ectoderm.epith.3
NvADAMTS-12 : NV2.21636	0.019892	0.247525	-0.143496	all.ectoderm.epith.4
NvADAMTS-13 : NV2.21638	0.0033329	0.455235	-0.185373	pSC.PGC.Mitotic.1
NvADAMTS-13 : NV2.21638	0.00874495	0.894855	-0.17304	pSC.PGC.Mitotic.2
NvADAMTS-13 : NV2.21638	0.0087477	1.43358	-0.173033	pSC.PGC.NPC
NvADAMTS-13 : NV2.21638	0.00728805	0.590717	-0.17636	pSC.PGC.NPC.g
NvADAMTS-13 : NV2.21638	0	0	-0.192968	pSC.PGC.PGC
NvADAMTS-13 : NV2.21638	0	0	-0.192968	pSC.PGC.primary.oocyte
NvADAMTS-13 : NV2.21638	0.00159638	0.1287	-0.18933	pSC.PGC.spermatagonia
NvADAMTS-13 : NV2.21638	0	0	-0.192968	pSC.PGC.maturing.sperm
NvADAMTS-13 : NV2.21638	0	0	-0.192968	pSC.PGC.maturing.sperm.2
NvADAMTS-13 : NV2.21638	4.00762	42.6966	2.5	neurogland.all.S1.L1
NvADAMTS-13 : NV2.21638	0.0143068	2.12766	-0.160365	neurogland.all.N1.L1
NvADAMTS-13 : NV2.21638	0	0	-0.192968	neurogland.all.N1.L2
NvADAMTS-13 : NV2.21638	0.0618428	4.71204	-0.0520367	neurogland.all.N1.L3
NvADAMTS-13 : NV2.21638	0	0	-0.192968	neurogland.all.N1.g.early
NvADAMTS-13 : NV2.21638	0	0	-0.192968	neurogland.all.N1.g1
NvADAMTS-13 : NV2.21638	0.0203998	1.31579	-0.14648	neurogland.all.N1.g2
NvADAMTS-13 : NV2.21638	0.0114576	0.383142	-0.166858	neurogland.all.N1.g3
NvADAMTS-13 : NV2.21638	0.081274	4.34783	-0.00775539	neurogland.all.N1.g4
NvADAMTS-13 : NV2.21638	0.0140869	1.75439	-0.160866	neurogland.all.N1.g5
NvADAMTS-13 : NV2.21638	0	0	-0.192968	neurogland.all.N1.early.1
NvADAMTS-13 : NV2.21638	0.0337027	1.89274	-0.116164	neurogland.all.N1.early.2
NvADAMTS-13 : NV2.21638	0	0	-0.192968	neurogland.all.N1.1
NvADAMTS-13 : NV2.21638	0	0	-0.192968	neurogland.all.N1.2
NvADAMTS-13 : NV2.21638	0	0	-0.192968	neurogland.all.N1.3
NvADAMTS-13 : NV2.21638	0	0	-0.192968	neurogland.all.N1.4
NvADAMTS-13 : NV2.21638	0	0	-0.192968	neurogland.all.N1.5
NvADAMTS-13 : NV2.21638	0.0348202	0.917431	-0.113618	neurogland.all.N1.6
NvADAMTS-13 : NV2.21638	1.75084	36.4103	2.5	neurogland.all.N1S.1
NvADAMTS-13 : NV2.21638	0.0588779	0.806452	-0.0587933	neurogland.all.N1S.2
NvADAMTS-13 : NV2.21638	0	0	-0.192968	neurogland.all.N1S.3
NvADAMTS-13 : NV2.21638	0.0426134	2.94118	-0.0958579	neurogland.all.N1S.4.early
NvADAMTS-13 : NV2.21638	0.00297555	0.497512	-0.186187	neurogland.all.N1S.4
NvADAMTS-13 : NV2.21638	0	0	-0.192968	neurogland.all.NGD.early
NvADAMTS-13 : NV2.21638	0.208678	7.84314	0.282581	neurogland.all.NGD.1
NvADAMTS-13 : NV2.21638	0.0378675	2.44399	-0.106673	neurogland.all.SGD.early
NvADAMTS-13 : NV2.21638	0	0	-0.192968	neurogland.all.S1.1
NvADAMTS-13 : NV2.21638	1.5399	21.659	2.5	neurogland.all.S1.2
NvADAMTS-13 : NV2.21638	0.0241442	1.44928	-0.137947	neurogland.all.S2.tll.1
NvADAMTS-13 : NV2.21638	0.00926203	2.16216	-0.171861	neurogland.all.S2.tll.2
NvADAMTS-13 : NV2.21638	0.0110581	1.26582	-0.167768	neurogland.all.S2.tll.3
NvADAMTS-13 : NV2.21638	0	0	-0.192968	neurogland.all.S2.tll.4
NvADAMTS-13 : NV2.21638	0	0	-0.192968	neurogland.all.GD.1
NvADAMTS-13 : NV2.21638	0	0	-0.192968	neurogland.all.GD.2
NvADAMTS-13 : NV2.21638	0.00378481	0.588235	-0.184343	neurogland.all.GD.3
NvADAMTS-13 : NV2.21638	0.0833327	0.990099	-0.00306396	neurogland.all.GD.4
NvADAMTS-13 : NV2.21638	0.0165069	1.19048	-0.155351	neurogland.all.GD.5
NvADAMTS-13 : NV2.21638	0	0	-0.192968	neurogland.all.S3
NvADAMTS-13 : NV2.21638	0.387406	10.7383	0.689879	neurogland.all.N2.g1
NvADAMTS-13 : NV2.21638	0	0	-0.192968	neurogland.all.N2.1
NvADAMTS-13 : NV2.21638	0.00559564	0.671141	-0.180217	neurogland.all.N2.2
NvADAMTS-13 : NV2.21638	0.0189665	0.854701	-0.149746	neurogland.all.N2.3
NvADAMTS-13 : NV2.21638	0	0	-0.192968	neurogland.all.N2.4
NvADAMTS-13 : NV2.21638	0	0	-0.192968	neurogland.all.N2.5
NvADAMTS-13 : NV2.21638	0	0	-0.192968	neurogland.all.N2.6
NvADAMTS-13 : NV2.21638	0	0	-0.192968	neurogland.all.N2.7
NvADAMTS-13 : NV2.21638	0.0367945	1.5873	-0.109118	neurogland.all.immune
NvADAMTS-13 : NV2.21638	0.0203291	0.556328	-0.146641	gland.mucous.1.dev.aboral
NvADAMTS-13 : NV2.21638	0.0444928	7.03125	-0.0915749	gland.mucous.2.dev
NvADAMTS-13 : NV2.21638	0.00686255	0.906344	-0.177329	gland.mucous.3.dev
NvADAMTS-13 : NV2.21638	0	0	-0.192968	gland.mucous.4.dev
NvADAMTS-13 : NV2.21638	0.0239268	0.621118	-0.138442	gland.mucous.5.adult
NvADAMTS-13 : NV2.21638	0.158312	1.43885	0.167805	gland.mucous.6.adult
NvADAMTS-13 : NV2.21638	0	0	-0.192968	gland.mucous.7.adult
NvADAMTS-13 : NV2.21638	0.00642281	1.23223	-0.178332	unchar.immune.1.early.gastrula
NvADAMTS-13 : NV2.21638	0.00914451	0.973236	-0.172129	unchar.immune.2.mid.gastrula
NvADAMTS-13 : NV2.21638	0.00284514	0.587084	-0.186485	unchar.immune.3.planula
NvADAMTS-13 : NV2.21638	0.134153	0.779221	0.112748	unchar.immune.4.mature
NvADAMTS-13 : NV2.21638	0	0	-0.192968	cnidocyte.pSC
NvADAMTS-13 : NV2.21638	0.0193933	2.17391	-0.148774	cnidocyte.gast.1
NvADAMTS-13 : NV2.21638	0	0	-0.192968	cnidocyte.nem.2
NvADAMTS-13 : NV2.21638	0.00718297	0.724638	-0.176599	cnidocyte.early
NvADAMTS-13 : NV2.21638	0.0101556	0.485437	-0.169825	cnidocyte.nep.8
NvADAMTS-13 : NV2.21638	0.00602139	1.68067	-0.179246	cnidocyte.planula.spir
NvADAMTS-13 : NV2.21638	0.000954578	0.387597	-0.190793	cnidocyte.spirocyte
NvADAMTS-13 : NV2.21638	0	0	-0.192968	cnidocyte.planula.nem
NvADAMTS-13 : NV2.21638	0.00869189	2.1978	-0.173161	cnidocyte.spirocyte.maturing
NvADAMTS-13 : NV2.21638	0.020932	0.45977	-0.145267	cnidocyte.maturing.1
NvADAMTS-13 : NV2.21638	0	0	-0.192968	cnidocyte.planula.mat
NvADAMTS-13 : NV2.21638	0.00165067	0.337268	-0.189207	cnidocyte.nem.1
NvADAMTS-13 : NV2.21638	0.0652929	3.01058	-0.0441744	cnidocyte.mature
NvADAMTS-13 : NV2.21638	0.0206794	0.597015	-0.145843	retractor muscle.RM.1
NvADAMTS-13 : NV2.21638	0.0396972	1.22449	-0.102504	retractor muscle.TR.2
NvADAMTS-13 : NV2.21638	0	0	-0.192968	retractor muscle.TR.1
NvADAMTS-13 : NV2.21638	0	0	-0.192968	retractor muscle.MR.1
NvADAMTS-13 : NV2.21638	0.0266349	9.93658	-0.132271	all.gastrodermis.gastrula.1
NvADAMTS-13 : NV2.21638	0.00377182	0.157729	-0.184373	all.gastrodermis.gastrula.2
NvADAMTS-13 : NV2.21638	0.00581595	1.4862	-0.179715	all.gastrodermis.gastrula.3
NvADAMTS-13 : NV2.21638	0.012179	0.214133	-0.165214	all.gastrodermis.early.1
NvADAMTS-13 : NV2.21638	0.0022114	0.498008	-0.187929	all.gastrodermis.early.2
NvADAMTS-13 : NV2.21638	0	0	-0.192968	all.gastrodermis.CM
NvADAMTS-13 : NV2.21638	0.00428879	0.428571	-0.183195	all.gastrodermis.MR/PM
NvADAMTS-13 : NV2.21638	0.00228679	0.1514	-0.187757	all.gastrodermis.gastrodermis
NvADAMTS-13 : NV2.21638	0.00269768	0.160128	-0.186821	all.gastrodermis.pharyngeal
NvADAMTS-13 : NV2.21638	0.0064654	0.298507	-0.178235	all.gastrodermis.ImM
NvADAMTS-13 : NV2.21638	0.0134031	0.292398	-0.162424	all.gastrodermis.non-muscle
NvADAMTS-13 : NV2.21638	0.0183461	0.323625	-0.15116	all.gastrodermis.mesentery
NvADAMTS-13 : NV2.21638	0	0	-0.192968	all.gastrodermis.neuron
NvADAMTS-13 : NV2.21638	0	0	-0.192968	all.gastrodermis.immune
NvADAMTS-13 : NV2.21638	0	0	-0.192968	all.gastrodermis.gland
NvADAMTS-13 : NV2.21638	0	0	-0.192968	all.gastrodermis.ciliated
NvADAMTS-13 : NV2.21638	0.00318276	0.290698	-0.185715	all.ectoderm.apical organ
NvADAMTS-13 : NV2.21638	0.018183	4.16041	-0.151532	all.ectoderm.early.ect.1
NvADAMTS-13 : NV2.21638	0.00918953	1.57146	-0.172027	all.ectoderm.early.ect.2
NvADAMTS-13 : NV2.21638	0.00158431	0.0402414	-0.189358	all.ectoderm.early.ect.2b
NvADAMTS-13 : NV2.21638	0.00478533	1.01523	-0.182063	all.ectoderm.lip
NvADAMTS-13 : NV2.21638	0.00879365	0.255319	-0.172929	all.ectoderm.pharyng.
NvADAMTS-13 : NV2.21638	0.00541562	0.101781	-0.180627	all.ectoderm.epith.1
NvADAMTS-13 : NV2.21638	0.00249756	0.207492	-0.187277	all.ectoderm.epith.2
NvADAMTS-13 : NV2.21638	0.00599397	0.267891	-0.179309	all.ectoderm.epith.3
NvADAMTS-13 : NV2.21638	0.00179433	0.123762	-0.188879	all.ectoderm.epith.4
NvADAMTS13-related : NV2.18541	0	0	-0.175574	pSC.PGC.Mitotic.1
NvADAMTS13-related : NV2.18541	0	0	-0.175574	pSC.PGC.Mitotic.2
NvADAMTS13-related : NV2.18541	0.000866289	0.0637146	-0.128466	pSC.PGC.NPC
NvADAMTS13-related : NV2.18541	0.00169318	0.0843882	-0.0835012	pSC.PGC.NPC.g
NvADAMTS13-related : NV2.18541	0	0	-0.175574	pSC.PGC.PGC
NvADAMTS13-related : NV2.18541	0	0	-0.175574	pSC.PGC.primary.oocyte
NvADAMTS13-related : NV2.18541	0	0	-0.175574	pSC.PGC.spermatagonia
NvADAMTS13-related : NV2.18541	0	0	-0.175574	pSC.PGC.maturing.sperm
NvADAMTS13-related : NV2.18541	0	0	-0.175574	pSC.PGC.maturing.sperm.2
NvADAMTS13-related : NV2.18541	0	0	-0.175574	neurogland.all.S1.L1
NvADAMTS13-related : NV2.18541	0	0	-0.175574	neurogland.all.N1.L1
NvADAMTS13-related : NV2.18541	0	0	-0.175574	neurogland.all.N1.L2
NvADAMTS13-related : NV2.18541	0	0	-0.175574	neurogland.all.N1.L3
NvADAMTS13-related : NV2.18541	0	0	-0.175574	neurogland.all.N1.g.early
NvADAMTS13-related : NV2.18541	0	0	-0.175574	neurogland.all.N1.g1
NvADAMTS13-related : NV2.18541	0	0	-0.175574	neurogland.all.N1.g2
NvADAMTS13-related : NV2.18541	0	0	-0.175574	neurogland.all.N1.g3
NvADAMTS13-related : NV2.18541	0	0	-0.175574	neurogland.all.N1.g4
NvADAMTS13-related : NV2.18541	0	0	-0.175574	neurogland.all.N1.g5
NvADAMTS13-related : NV2.18541	0	0	-0.175574	neurogland.all.N1.early.1
NvADAMTS13-related : NV2.18541	0	0	-0.175574	neurogland.all.N1.early.2
NvADAMTS13-related : NV2.18541	0	0	-0.175574	neurogland.all.N1.1
NvADAMTS13-related : NV2.18541	0	0	-0.175574	neurogland.all.N1.2
NvADAMTS13-related : NV2.18541	0	0	-0.175574	neurogland.all.N1.3
NvADAMTS13-related : NV2.18541	0	0	-0.175574	neurogland.all.N1.4
NvADAMTS13-related : NV2.18541	0	0	-0.175574	neurogland.all.N1.5
NvADAMTS13-related : NV2.18541	0	0	-0.175574	neurogland.all.N1.6
NvADAMTS13-related : NV2.18541	0	0	-0.175574	neurogland.all.N1S.1
NvADAMTS13-related : NV2.18541	0	0	-0.175574	neurogland.all.N1S.2
NvADAMTS13-related : NV2.18541	0	0	-0.175574	neurogland.all.N1S.3
NvADAMTS13-related : NV2.18541	0	0	-0.175574	neurogland.all.N1S.4.early
NvADAMTS13-related : NV2.18541	0	0	-0.175574	neurogland.all.N1S.4
NvADAMTS13-related : NV2.18541	0	0	-0.175574	neurogland.all.NGD.early
NvADAMTS13-related : NV2.18541	0	0	-0.175574	neurogland.all.NGD.1
NvADAMTS13-related : NV2.18541	0.0120182	0.407332	0.477956	neurogland.all.SGD.early
NvADAMTS13-related : NV2.18541	0	0	-0.175574	neurogland.all.S1.1
NvADAMTS13-related : NV2.18541	0.0133034	0.460829	0.547844	neurogland.all.S1.2
NvADAMTS13-related : NV2.18541	0.0197582	0.724638	0.898848	neurogland.all.S2.tll.1
NvADAMTS13-related : NV2.18541	0.00225413	0.540541	-0.0529977	neurogland.all.S2.tll.2
NvADAMTS13-related : NV2.18541	0	0	-0.175574	neurogland.all.S2.tll.3
NvADAMTS13-related : NV2.18541	0	0	-0.175574	neurogland.all.S2.tll.4
NvADAMTS13-related : NV2.18541	0	0	-0.175574	neurogland.all.GD.1
NvADAMTS13-related : NV2.18541	0	0	-0.175574	neurogland.all.GD.2
NvADAMTS13-related : NV2.18541	0.000949042	0.588235	-0.123966	neurogland.all.GD.3
NvADAMTS13-related : NV2.18541	0	0	-0.175574	neurogland.all.GD.4
NvADAMTS13-related : NV2.18541	0	0	-0.175574	neurogland.all.GD.5
NvADAMTS13-related : NV2.18541	0	0	-0.175574	neurogland.all.S3
NvADAMTS13-related : NV2.18541	0	0	-0.175574	neurogland.all.N2.g1
NvADAMTS13-related : NV2.18541	0.18847	3.125	2.5	neurogland.all.N2.1
NvADAMTS13-related : NV2.18541	0.0211583	0.671141	0.974982	neurogland.all.N2.2
NvADAMTS13-related : NV2.18541	0.0244687	0.854701	1.155	neurogland.all.N2.3
NvADAMTS13-related : NV2.18541	0	0	-0.175574	neurogland.all.N2.4
NvADAMTS13-related : NV2.18541	0	0	-0.175574	neurogland.all.N2.5
NvADAMTS13-related : NV2.18541	0	0	-0.175574	neurogland.all.N2.6
NvADAMTS13-related : NV2.18541	0	0	-0.175574	neurogland.all.N2.7
NvADAMTS13-related : NV2.18541	0	0	-0.175574	neurogland.all.immune
NvADAMTS13-related : NV2.18541	0	0	-0.175574	gland.mucous.1.dev.aboral
NvADAMTS13-related : NV2.18541	0	0	-0.175574	gland.mucous.2.dev
NvADAMTS13-related : NV2.18541	0	0	-0.175574	gland.mucous.3.dev
NvADAMTS13-related : NV2.18541	0	0	-0.175574	gland.mucous.4.dev
NvADAMTS13-related : NV2.18541	0	0	-0.175574	gland.mucous.5.adult
NvADAMTS13-related : NV2.18541	0	0	-0.175574	gland.mucous.6.adult
NvADAMTS13-related : NV2.18541	0	0	-0.175574	gland.mucous.7.adult
NvADAMTS13-related : NV2.18541	0.000421687	0.0947867	-0.152643	unchar.immune.1.early.gastrula
NvADAMTS13-related : NV2.18541	0.00539928	0.486618	0.118031	unchar.immune.2.mid.gastrula
NvADAMTS13-related : NV2.18541	0	0	-0.175574	unchar.immune.3.planula
NvADAMTS13-related : NV2.18541	0.0151627	0.38961	0.648948	unchar.immune.4.mature
NvADAMTS13-related : NV2.18541	0	0	-0.175574	cnidocyte.pSC
NvADAMTS13-related : NV2.18541	0	0	-0.175574	cnidocyte.gast.1
NvADAMTS13-related : NV2.18541	0.0117435	0.184843	0.46302	cnidocyte.nem.2
NvADAMTS13-related : NV2.18541	0	0	-0.175574	cnidocyte.early
NvADAMTS13-related : NV2.18541	0.002998	0.485437	-0.012547	cnidocyte.nep.8
NvADAMTS13-related : NV2.18541	0.00304359	0.840336	-0.0100679	cnidocyte.planula.spir
NvADAMTS13-related : NV2.18541	0	0	-0.175574	cnidocyte.spirocyte
NvADAMTS13-related : NV2.18541	0	0	-0.175574	cnidocyte.planula.nem
NvADAMTS13-related : NV2.18541	0	0	-0.175574	cnidocyte.spirocyte.maturing
NvADAMTS13-related : NV2.18541	0	0	-0.175574	cnidocyte.maturing.1
NvADAMTS13-related : NV2.18541	0	0	-0.175574	cnidocyte.planula.mat
NvADAMTS13-related : NV2.18541	0	0	-0.175574	cnidocyte.nem.1
NvADAMTS13-related : NV2.18541	0	0	-0.175574	cnidocyte.mature
NvADAMTS13-related : NV2.18541	0	0	-0.175574	retractor muscle.RM.1
NvADAMTS13-related : NV2.18541	0	0	-0.175574	retractor muscle.TR.2
NvADAMTS13-related : NV2.18541	0	0	-0.175574	retractor muscle.TR.1
NvADAMTS13-related : NV2.18541	0	0	-0.175574	retractor muscle.MR.1
NvADAMTS13-related : NV2.18541	0	0	-0.175574	all.gastrodermis.gastrula.1
NvADAMTS13-related : NV2.18541	0	0	-0.175574	all.gastrodermis.gastrula.2
NvADAMTS13-related : NV2.18541	0.00173081	0.424628	-0.0814548	all.gastrodermis.gastrula.3
NvADAMTS13-related : NV2.18541	0	0	-0.175574	all.gastrodermis.early.1
NvADAMTS13-related : NV2.18541	0.00225259	0.896414	-0.0530816	all.gastrodermis.early.2
NvADAMTS13-related : NV2.18541	0	0	-0.175574	all.gastrodermis.CM
NvADAMTS13-related : NV2.18541	0	0	-0.175574	all.gastrodermis.MR/PM
NvADAMTS13-related : NV2.18541	0	0	-0.175574	all.gastrodermis.gastrodermis
NvADAMTS13-related : NV2.18541	0.00601985	0.0800641	0.151777	all.gastrodermis.pharyngeal
NvADAMTS13-related : NV2.18541	0	0	-0.175574	all.gastrodermis.ImM
NvADAMTS13-related : NV2.18541	0.0014322	0.146199	-0.0976931	all.gastrodermis.non-muscle
NvADAMTS13-related : NV2.18541	0	0	-0.175574	all.gastrodermis.mesentery
NvADAMTS13-related : NV2.18541	0	0	-0.175574	all.gastrodermis.neuron
NvADAMTS13-related : NV2.18541	0.0157915	0.763359	0.683141	all.gastrodermis.immune
NvADAMTS13-related : NV2.18541	0	0	-0.175574	all.gastrodermis.gland
NvADAMTS13-related : NV2.18541	0	0	-0.175574	all.gastrodermis.ciliated
NvADAMTS13-related : NV2.18541	0	0	-0.175574	all.ectoderm.apical organ
NvADAMTS13-related : NV2.18541	0	0	-0.175574	all.ectoderm.early.ect.1
NvADAMTS13-related : NV2.18541	0	0	-0.175574	all.ectoderm.early.ect.2
NvADAMTS13-related : NV2.18541	0	0	-0.175574	all.ectoderm.early.ect.2b
NvADAMTS13-related : NV2.18541	0.000319302	0.0846024	-0.158211	all.ectoderm.lip
NvADAMTS13-related : NV2.18541	0.0014458	0.0319149	-0.0969533	all.ectoderm.pharyng.
NvADAMTS13-related : NV2.18541	0.00246086	0.0127226	-0.0417561	all.ectoderm.epith.1
NvADAMTS13-related : NV2.18541	0	0	-0.175574	all.ectoderm.epith.2
NvADAMTS13-related : NV2.18541	0	0	-0.175574	all.ectoderm.epith.3
NvADAMTS13-related : NV2.18541	0	0	-0.175574	all.ectoderm.epith.4
NvADAMTS-14 : NV2.22465	0.000147767	0.0758725	-0.109246	pSC.PGC.Mitotic.1
NvADAMTS-14 : NV2.22465	0	0	-0.109567	pSC.PGC.Mitotic.2
NvADAMTS-14 : NV2.22465	0.000517077	0.0637146	-0.108445	pSC.PGC.NPC
NvADAMTS-14 : NV2.22465	0	0	-0.109567	pSC.PGC.NPC.g
NvADAMTS-14 : NV2.22465	0	0	-0.109567	pSC.PGC.PGC
NvADAMTS-14 : NV2.22465	0	0	-0.109567	pSC.PGC.primary.oocyte
NvADAMTS-14 : NV2.22465	0.00993057	0.1287	-0.0880249	pSC.PGC.spermatagonia
NvADAMTS-14 : NV2.22465	0	0	-0.109567	pSC.PGC.maturing.sperm
NvADAMTS-14 : NV2.22465	0	0	-0.109567	pSC.PGC.maturing.sperm.2
NvADAMTS-14 : NV2.22465	0	0	-0.109567	neurogland.all.S1.L1
NvADAMTS-14 : NV2.22465	0	0	-0.109567	neurogland.all.N1.L1
NvADAMTS-14 : NV2.22465	0	0	-0.109567	neurogland.all.N1.L2
NvADAMTS-14 : NV2.22465	0	0	-0.109567	neurogland.all.N1.L3
NvADAMTS-14 : NV2.22465	0	0	-0.109567	neurogland.all.N1.g.early
NvADAMTS-14 : NV2.22465	0	0	-0.109567	neurogland.all.N1.g1
NvADAMTS-14 : NV2.22465	0	0	-0.109567	neurogland.all.N1.g2
NvADAMTS-14 : NV2.22465	0	0	-0.109567	neurogland.all.N1.g3
NvADAMTS-14 : NV2.22465	0	0	-0.109567	neurogland.all.N1.g4
NvADAMTS-14 : NV2.22465	0	0	-0.109567	neurogland.all.N1.g5
NvADAMTS-14 : NV2.22465	0	0	-0.109567	neurogland.all.N1.early.1
NvADAMTS-14 : NV2.22465	0.021395	0.315457	-0.063156	neurogland.all.N1.early.2
NvADAMTS-14 : NV2.22465	0	0	-0.109567	neurogland.all.N1.1
NvADAMTS-14 : NV2.22465	0.0191872	0.909091	-0.0679452	neurogland.all.N1.2
NvADAMTS-14 : NV2.22465	0	0	-0.109567	neurogland.all.N1.3
NvADAMTS-14 : NV2.22465	0	0	-0.109567	neurogland.all.N1.4
NvADAMTS-14 : NV2.22465	0	0	-0.109567	neurogland.all.N1.5
NvADAMTS-14 : NV2.22465	0	0	-0.109567	neurogland.all.N1.6
NvADAMTS-14 : NV2.22465	0.104104	1.53846	0.116257	neurogland.all.N1S.1
NvADAMTS-14 : NV2.22465	0	0	-0.109567	neurogland.all.N1S.2
NvADAMTS-14 : NV2.22465	0	0	-0.109567	neurogland.all.N1S.3
NvADAMTS-14 : NV2.22465	0	0	-0.109567	neurogland.all.N1S.4.early
NvADAMTS-14 : NV2.22465	0	0	-0.109567	neurogland.all.N1S.4
NvADAMTS-14 : NV2.22465	0	0	-0.109567	neurogland.all.NGD.early
NvADAMTS-14 : NV2.22465	0	0	-0.109567	neurogland.all.NGD.1
NvADAMTS-14 : NV2.22465	0	0	-0.109567	neurogland.all.SGD.early
NvADAMTS-14 : NV2.22465	0	0	-0.109567	neurogland.all.S1.1
NvADAMTS-14 : NV2.22465	4.83564	10.5991	2.5	neurogland.all.S1.2
NvADAMTS-14 : NV2.22465	0	0	-0.109567	neurogland.all.S2.tll.1
NvADAMTS-14 : NV2.22465	0	0	-0.109567	neurogland.all.S2.tll.2
NvADAMTS-14 : NV2.22465	0	0	-0.109567	neurogland.all.S2.tll.3
NvADAMTS-14 : NV2.22465	0	0	-0.109567	neurogland.all.S2.tll.4
NvADAMTS-14 : NV2.22465	0	0	-0.109567	neurogland.all.GD.1
NvADAMTS-14 : NV2.22465	0	0	-0.109567	neurogland.all.GD.2
NvADAMTS-14 : NV2.22465	0	0	-0.109567	neurogland.all.GD.3
NvADAMTS-14 : NV2.22465	0	0	-0.109567	neurogland.all.GD.4
NvADAMTS-14 : NV2.22465	0	0	-0.109567	neurogland.all.GD.5
NvADAMTS-14 : NV2.22465	0	0	-0.109567	neurogland.all.S3
NvADAMTS-14 : NV2.22465	0.00443231	0.671141	-0.0999518	neurogland.all.N2.g1
NvADAMTS-14 : NV2.22465	0	0	-0.109567	neurogland.all.N2.1
NvADAMTS-14 : NV2.22465	0	0	-0.109567	neurogland.all.N2.2
NvADAMTS-14 : NV2.22465	0	0	-0.109567	neurogland.all.N2.3
NvADAMTS-14 : NV2.22465	0	0	-0.109567	neurogland.all.N2.4
NvADAMTS-14 : NV2.22465	0	0	-0.109567	neurogland.all.N2.5
NvADAMTS-14 : NV2.22465	0	0	-0.109567	neurogland.all.N2.6
NvADAMTS-14 : NV2.22465	0	0	-0.109567	neurogland.all.N2.7
NvADAMTS-14 : NV2.22465	0.119199	0.396825	0.149003	neurogland.all.immune
NvADAMTS-14 : NV2.22465	0.00197296	0.278164	-0.105287	gland.mucous.1.dev.aboral
NvADAMTS-14 : NV2.22465	0	0	-0.109567	gland.mucous.2.dev
NvADAMTS-14 : NV2.22465	0	0	-0.109567	gland.mucous.3.dev
NvADAMTS-14 : NV2.22465	0	0	-0.109567	gland.mucous.4.dev
NvADAMTS-14 : NV2.22465	0.0118664	0.207039	-0.0838256	gland.mucous.5.adult
NvADAMTS-14 : NV2.22465	0	0	-0.109567	gland.mucous.6.adult
NvADAMTS-14 : NV2.22465	0	0	-0.109567	gland.mucous.7.adult
NvADAMTS-14 : NV2.22465	0.00101987	0.0947867	-0.107354	unchar.immune.1.early.gastrula
NvADAMTS-14 : NV2.22465	0	0	-0.109567	unchar.immune.2.mid.gastrula
NvADAMTS-14 : NV2.22465	0	0	-0.109567	unchar.immune.3.planula
NvADAMTS-14 : NV2.22465	0.110157	0.25974	0.129389	unchar.immune.4.mature
NvADAMTS-14 : NV2.22465	0	0	-0.109567	cnidocyte.pSC
NvADAMTS-14 : NV2.22465	0	0	-0.109567	cnidocyte.gast.1
NvADAMTS-14 : NV2.22465	0	0	-0.109567	cnidocyte.nem.2
NvADAMTS-14 : NV2.22465	0.000419089	0.120773	-0.108657	cnidocyte.early
NvADAMTS-14 : NV2.22465	0	0	-0.109567	cnidocyte.nep.8
NvADAMTS-14 : NV2.22465	0	0	-0.109567	cnidocyte.planula.spir
NvADAMTS-14 : NV2.22465	0.0566517	1.93798	0.0133235	cnidocyte.spirocyte
NvADAMTS-14 : NV2.22465	0	0	-0.109567	cnidocyte.planula.nem
NvADAMTS-14 : NV2.22465	0.134066	2.1978	0.181253	cnidocyte.spirocyte.maturing
NvADAMTS-14 : NV2.22465	0	0	-0.109567	cnidocyte.maturing.1
NvADAMTS-14 : NV2.22465	0	0	-0.109567	cnidocyte.planula.mat
NvADAMTS-14 : NV2.22465	0.000753436	0.168634	-0.107932	cnidocyte.nem.1
NvADAMTS-14 : NV2.22465	0.0175804	0.244101	-0.0714308	cnidocyte.mature
NvADAMTS-14 : NV2.22465	0	0	-0.109567	retractor muscle.RM.1
NvADAMTS-14 : NV2.22465	0.00312386	0.408163	-0.10279	retractor muscle.TR.2
NvADAMTS-14 : NV2.22465	0	0	-0.109567	retractor muscle.TR.1
NvADAMTS-14 : NV2.22465	0	0	-0.109567	retractor muscle.MR.1
NvADAMTS-14 : NV2.22465	0	0	-0.109567	all.gastrodermis.gastrula.1
NvADAMTS-14 : NV2.22465	0	0	-0.109567	all.gastrodermis.gastrula.2
NvADAMTS-14 : NV2.22465	0.00764729	0.424628	-0.0929778	all.gastrodermis.gastrula.3
NvADAMTS-14 : NV2.22465	0.0152968	0.214133	-0.0763844	all.gastrodermis.early.1
NvADAMTS-14 : NV2.22465	0.00050003	0.298805	-0.108482	all.gastrodermis.early.2
NvADAMTS-14 : NV2.22465	0	0	-0.109567	all.gastrodermis.CM
NvADAMTS-14 : NV2.22465	0.0017641	0.142857	-0.10574	all.gastrodermis.MR/PM
NvADAMTS-14 : NV2.22465	0.00775617	0.0757002	-0.0927417	all.gastrodermis.gastrodermis
NvADAMTS-14 : NV2.22465	0	0	-0.109567	all.gastrodermis.pharyngeal
NvADAMTS-14 : NV2.22465	0	0	-0.109567	all.gastrodermis.ImM
NvADAMTS-14 : NV2.22465	0.0139776	0.877193	-0.0792461	all.gastrodermis.non-muscle
NvADAMTS-14 : NV2.22465	0	0	-0.109567	all.gastrodermis.mesentery
NvADAMTS-14 : NV2.22465	0.0253515	0.598802	-0.0545735	all.gastrodermis.neuron
NvADAMTS-14 : NV2.22465	0.023259	0.763359	-0.0591127	all.gastrodermis.immune
NvADAMTS-14 : NV2.22465	0	0	-0.109567	all.gastrodermis.gland
NvADAMTS-14 : NV2.22465	0	0	-0.109567	all.gastrodermis.ciliated
NvADAMTS-14 : NV2.22465	0	0	-0.109567	all.ectoderm.apical organ
NvADAMTS-14 : NV2.22465	0.000759918	0.0857817	-0.107918	all.ectoderm.early.ect.1
NvADAMTS-14 : NV2.22465	0.000143405	0.0249439	-0.109255	all.ectoderm.early.ect.2
NvADAMTS-14 : NV2.22465	0	0	-0.109567	all.ectoderm.early.ect.2b
NvADAMTS-14 : NV2.22465	0.00102648	0.0846024	-0.10734	all.ectoderm.lip
NvADAMTS-14 : NV2.22465	0.001427	0.0106383	-0.106471	all.ectoderm.pharyng.
NvADAMTS-14 : NV2.22465	0.000810528	0.0254453	-0.107808	all.ectoderm.epith.1
NvADAMTS-14 : NV2.22465	0.0032535	0.0436824	-0.102509	all.ectoderm.epith.2
NvADAMTS-14 : NV2.22465	0	0	-0.109567	all.ectoderm.epith.3
NvADAMTS-14 : NV2.22465	0.000921674	0.0618812	-0.107567	all.ectoderm.epith.4
NvADAMTS-15 : NV2.25184	0.000896014	0.151745	-0.236872	pSC.PGC.Mitotic.1
NvADAMTS-15 : NV2.25184	0.0033862	0.33557	-0.225327	pSC.PGC.Mitotic.2
NvADAMTS-15 : NV2.25184	0.00504197	0.286716	-0.217651	pSC.PGC.NPC
NvADAMTS-15 : NV2.25184	0.0028701	0.421941	-0.22772	pSC.PGC.NPC.g
NvADAMTS-15 : NV2.25184	0	0	-0.241027	pSC.PGC.PGC
NvADAMTS-15 : NV2.25184	0.161249	5.88235	0.506556	pSC.PGC.primary.oocyte
NvADAMTS-15 : NV2.25184	0.0136147	0.772201	-0.177906	pSC.PGC.spermatagonia
NvADAMTS-15 : NV2.25184	0.0125157	0.869565	-0.183001	pSC.PGC.maturing.sperm
NvADAMTS-15 : NV2.25184	0.0362447	0.917431	-0.0729888	pSC.PGC.maturing.sperm.2
NvADAMTS-15 : NV2.25184	0	0	-0.241027	neurogland.all.S1.L1
NvADAMTS-15 : NV2.25184	0	0	-0.241027	neurogland.all.N1.L1
NvADAMTS-15 : NV2.25184	0.00631855	1.47059	-0.211732	neurogland.all.N1.L2
NvADAMTS-15 : NV2.25184	0.00146606	0.52356	-0.23423	neurogland.all.N1.L3
NvADAMTS-15 : NV2.25184	0.0962742	1.53846	0.20532	neurogland.all.N1.g.early
NvADAMTS-15 : NV2.25184	0	0	-0.241027	neurogland.all.N1.g1
NvADAMTS-15 : NV2.25184	0	0	-0.241027	neurogland.all.N1.g2
NvADAMTS-15 : NV2.25184	0.0259066	0.766284	-0.120918	neurogland.all.N1.g3
NvADAMTS-15 : NV2.25184	0	0	-0.241027	neurogland.all.N1.g4
NvADAMTS-15 : NV2.25184	0	0	-0.241027	neurogland.all.N1.g5
NvADAMTS-15 : NV2.25184	0.0198128	1.04712	-0.14917	neurogland.all.N1.early.1
NvADAMTS-15 : NV2.25184	0.00609772	0.630915	-0.212756	neurogland.all.N1.early.2
NvADAMTS-15 : NV2.25184	0	0	-0.241027	neurogland.all.N1.1
NvADAMTS-15 : NV2.25184	0	0	-0.241027	neurogland.all.N1.2
NvADAMTS-15 : NV2.25184	0.0507488	0.934579	-0.00574478	neurogland.all.N1.3
NvADAMTS-15 : NV2.25184	0	0	-0.241027	neurogland.all.N1.4
NvADAMTS-15 : NV2.25184	0	0	-0.241027	neurogland.all.N1.5
NvADAMTS-15 : NV2.25184	0.0104682	0.458716	-0.192494	neurogland.all.N1.6
NvADAMTS-15 : NV2.25184	0	0	-0.241027	neurogland.all.N1S.1
NvADAMTS-15 : NV2.25184	0.00988299	0.403226	-0.195207	neurogland.all.N1S.2
NvADAMTS-15 : NV2.25184	0	0	-0.241027	neurogland.all.N1S.3
NvADAMTS-15 : NV2.25184	0	0	-0.241027	neurogland.all.N1S.4.early
NvADAMTS-15 : NV2.25184	0	0	-0.241027	neurogland.all.N1S.4
NvADAMTS-15 : NV2.25184	0	0	-0.241027	neurogland.all.NGD.early
NvADAMTS-15 : NV2.25184	0	0	-0.241027	neurogland.all.NGD.1
NvADAMTS-15 : NV2.25184	0.00188265	0.610998	-0.232298	neurogland.all.SGD.early
NvADAMTS-15 : NV2.25184	0.0219407	1.40845	-0.139305	neurogland.all.S1.1
NvADAMTS-15 : NV2.25184	0	0	-0.241027	neurogland.all.S1.2
NvADAMTS-15 : NV2.25184	0	0	-0.241027	neurogland.all.S2.tll.1
NvADAMTS-15 : NV2.25184	0	0	-0.241027	neurogland.all.S2.tll.2
NvADAMTS-15 : NV2.25184	0	0	-0.241027	neurogland.all.S2.tll.3
NvADAMTS-15 : NV2.25184	0	0	-0.241027	neurogland.all.S2.tll.4
NvADAMTS-15 : NV2.25184	0	0	-0.241027	neurogland.all.GD.1
NvADAMTS-15 : NV2.25184	0	0	-0.241027	neurogland.all.GD.2
NvADAMTS-15 : NV2.25184	0	0	-0.241027	neurogland.all.GD.3
NvADAMTS-15 : NV2.25184	0.00327847	0.49505	-0.225827	neurogland.all.GD.4
NvADAMTS-15 : NV2.25184	0	0	-0.241027	neurogland.all.GD.5
NvADAMTS-15 : NV2.25184	0.00560881	0.763359	-0.215023	neurogland.all.S3
NvADAMTS-15 : NV2.25184	0	0	-0.241027	neurogland.all.N2.g1
NvADAMTS-15 : NV2.25184	0.0177299	1.04167	-0.158827	neurogland.all.N2.1
NvADAMTS-15 : NV2.25184	0	0	-0.241027	neurogland.all.N2.2
NvADAMTS-15 : NV2.25184	0	0	-0.241027	neurogland.all.N2.3
NvADAMTS-15 : NV2.25184	0.0307738	0.662252	-0.098353	neurogland.all.N2.4
NvADAMTS-15 : NV2.25184	0	0	-0.241027	neurogland.all.N2.5
NvADAMTS-15 : NV2.25184	0	0	-0.241027	neurogland.all.N2.6
NvADAMTS-15 : NV2.25184	0	0	-0.241027	neurogland.all.N2.7
NvADAMTS-15 : NV2.25184	0.00973725	0.793651	-0.195883	neurogland.all.immune
NvADAMTS-15 : NV2.25184	0.00687643	0.417246	-0.209146	gland.mucous.1.dev.aboral
NvADAMTS-15 : NV2.25184	0.00253356	0.390625	-0.22928	gland.mucous.2.dev
NvADAMTS-15 : NV2.25184	0.00317963	0.60423	-0.226285	gland.mucous.3.dev
NvADAMTS-15 : NV2.25184	0	0	-0.241027	gland.mucous.4.dev
NvADAMTS-15 : NV2.25184	0.00222479	0.207039	-0.230712	gland.mucous.5.adult
NvADAMTS-15 : NV2.25184	0.00146421	0.239808	-0.234238	gland.mucous.6.adult
NvADAMTS-15 : NV2.25184	0	0	-0.241027	gland.mucous.7.adult
NvADAMTS-15 : NV2.25184	0.00647196	0.56872	-0.211021	unchar.immune.1.early.gastrula
NvADAMTS-15 : NV2.25184	0.0114405	0.973236	-0.187986	unchar.immune.2.mid.gastrula
NvADAMTS-15 : NV2.25184	0	0	-0.241027	unchar.immune.3.planula
NvADAMTS-15 : NV2.25184	0.000699807	0.12987	-0.237782	unchar.immune.4.mature
NvADAMTS-15 : NV2.25184	0.016452	0.776699	-0.164752	cnidocyte.pSC
NvADAMTS-15 : NV2.25184	0.0106744	0.407609	-0.191538	cnidocyte.gast.1
NvADAMTS-15 : NV2.25184	1.42294	26.0628	2.5	cnidocyte.nem.2
NvADAMTS-15 : NV2.25184	0.0453528	1.93237	-0.0307617	cnidocyte.early
NvADAMTS-15 : NV2.25184	0.362979	16.0194	1.44182	cnidocyte.nep.8
NvADAMTS-15 : NV2.25184	0.0684223	9.2437	0.0761933	cnidocyte.planula.spir
NvADAMTS-15 : NV2.25184	0.411842	18.9922	1.66836	cnidocyte.spirocyte
NvADAMTS-15 : NV2.25184	0.962015	25.3165	2.5	cnidocyte.planula.nem
NvADAMTS-15 : NV2.25184	0.0638855	4.3956	0.0551599	cnidocyte.spirocyte.maturing
NvADAMTS-15 : NV2.25184	0.134464	11.954	0.382375	cnidocyte.maturing.1
NvADAMTS-15 : NV2.25184	0	0	-0.241027	cnidocyte.planula.mat
NvADAMTS-15 : NV2.25184	1.42772	64.2496	2.5	cnidocyte.nem.1
NvADAMTS-15 : NV2.25184	0.0607796	1.95281	0.0407602	cnidocyte.mature
NvADAMTS-15 : NV2.25184	0	0	-0.241027	retractor muscle.RM.1
NvADAMTS-15 : NV2.25184	0	0	-0.241027	retractor muscle.TR.2
NvADAMTS-15 : NV2.25184	0	0	-0.241027	retractor muscle.TR.1
NvADAMTS-15 : NV2.25184	0.00330997	0.414938	-0.225681	retractor muscle.MR.1
NvADAMTS-15 : NV2.25184	0.00821995	3.17125	-0.202917	all.gastrodermis.gastrula.1
NvADAMTS-15 : NV2.25184	0	0	-0.241027	all.gastrodermis.gastrula.2
NvADAMTS-15 : NV2.25184	0.00764505	1.69851	-0.205583	all.gastrodermis.gastrula.3
NvADAMTS-15 : NV2.25184	0.00977164	0.142755	-0.195723	all.gastrodermis.early.1
NvADAMTS-15 : NV2.25184	0.00996818	0.896414	-0.194812	all.gastrodermis.early.2
NvADAMTS-15 : NV2.25184	0.00110017	0.0798722	-0.235926	all.gastrodermis.CM
NvADAMTS-15 : NV2.25184	0	0	-0.241027	all.gastrodermis.MR/PM
NvADAMTS-15 : NV2.25184	0.00988254	0.0757002	-0.195209	all.gastrodermis.gastrodermis
NvADAMTS-15 : NV2.25184	0.0131442	0.160128	-0.180087	all.gastrodermis.pharyngeal
NvADAMTS-15 : NV2.25184	0	0	-0.241027	all.gastrodermis.ImM
NvADAMTS-15 : NV2.25184	0.0233937	0.730994	-0.132569	all.gastrodermis.non-muscle
NvADAMTS-15 : NV2.25184	0.03439	1.61812	-0.0815873	all.gastrodermis.mesentery
NvADAMTS-15 : NV2.25184	0	0	-0.241027	all.gastrodermis.neuron
NvADAMTS-15 : NV2.25184	0	0	-0.241027	all.gastrodermis.immune
NvADAMTS-15 : NV2.25184	0.00358786	0.487805	-0.224393	all.gastrodermis.gland
NvADAMTS-15 : NV2.25184	0	0	-0.241027	all.gastrodermis.ciliated
NvADAMTS-15 : NV2.25184	0.000156168	0.145349	-0.240303	all.ectoderm.apical organ
NvADAMTS-15 : NV2.25184	0.00299882	0.557581	-0.227123	all.ectoderm.early.ect.1
NvADAMTS-15 : NV2.25184	0.000661273	0.124719	-0.237961	all.ectoderm.early.ect.2
NvADAMTS-15 : NV2.25184	0	0	-0.241027	all.ectoderm.early.ect.2b
NvADAMTS-15 : NV2.25184	0.000562618	0.169205	-0.238418	all.ectoderm.lip
NvADAMTS-15 : NV2.25184	0.00399985	0.106383	-0.222482	all.ectoderm.pharyng.
NvADAMTS-15 : NV2.25184	0.00528425	0.0890585	-0.216528	all.ectoderm.epith.1
NvADAMTS-15 : NV2.25184	0.00386675	0.18565	-0.2231	all.ectoderm.epith.2
NvADAMTS-15 : NV2.25184	0.000566966	0.0382702	-0.238398	all.ectoderm.epith.3
NvADAMTS-15 : NV2.25184	0	0	-0.241027	all.ectoderm.epith.4
NvADAMTS-17 : NV2.23275	0.000770123	0.0758725	-0.339711	pSC.PGC.Mitotic.1
NvADAMTS-17 : NV2.23275	0.00553452	0.33557	-0.109241	pSC.PGC.Mitotic.2
NvADAMTS-17 : NV2.23275	0.000801824	0.0637146	-0.338177	pSC.PGC.NPC
NvADAMTS-17 : NV2.23275	0.000350158	0.0843882	-0.360026	pSC.PGC.NPC.g
NvADAMTS-17 : NV2.23275	0	0	-0.376964	pSC.PGC.PGC
NvADAMTS-17 : NV2.23275	0	0	-0.376964	pSC.PGC.primary.oocyte
NvADAMTS-17 : NV2.23275	0	0	-0.376964	pSC.PGC.spermatagonia
NvADAMTS-17 : NV2.23275	0	0	-0.376964	pSC.PGC.maturing.sperm
NvADAMTS-17 : NV2.23275	0	0	-0.376964	pSC.PGC.maturing.sperm.2
NvADAMTS-17 : NV2.23275	0	0	-0.376964	neurogland.all.S1.L1
NvADAMTS-17 : NV2.23275	0	0	-0.376964	neurogland.all.N1.L1
NvADAMTS-17 : NV2.23275	0	0	-0.376964	neurogland.all.N1.L2
NvADAMTS-17 : NV2.23275	0	0	-0.376964	neurogland.all.N1.L3
NvADAMTS-17 : NV2.23275	0	0	-0.376964	neurogland.all.N1.g.early
NvADAMTS-17 : NV2.23275	0	0	-0.376964	neurogland.all.N1.g1
NvADAMTS-17 : NV2.23275	0	0	-0.376964	neurogland.all.N1.g2
NvADAMTS-17 : NV2.23275	0	0	-0.376964	neurogland.all.N1.g3
NvADAMTS-17 : NV2.23275	0	0	-0.376964	neurogland.all.N1.g4
NvADAMTS-17 : NV2.23275	0	0	-0.376964	neurogland.all.N1.g5
NvADAMTS-17 : NV2.23275	0	0	-0.376964	neurogland.all.N1.early.1
NvADAMTS-17 : NV2.23275	0.0152986	0.315457	0.363081	neurogland.all.N1.early.2
NvADAMTS-17 : NV2.23275	0	0	-0.376964	neurogland.all.N1.1
NvADAMTS-17 : NV2.23275	0	0	-0.376964	neurogland.all.N1.2
NvADAMTS-17 : NV2.23275	0	0	-0.376964	neurogland.all.N1.3
NvADAMTS-17 : NV2.23275	0	0	-0.376964	neurogland.all.N1.4
NvADAMTS-17 : NV2.23275	0	0	-0.376964	neurogland.all.N1.5
NvADAMTS-17 : NV2.23275	0	0	-0.376964	neurogland.all.N1.6
NvADAMTS-17 : NV2.23275	0	0	-0.376964	neurogland.all.N1S.1
NvADAMTS-17 : NV2.23275	0	0	-0.376964	neurogland.all.N1S.2
NvADAMTS-17 : NV2.23275	0	0	-0.376964	neurogland.all.N1S.3
NvADAMTS-17 : NV2.23275	0	0	-0.376964	neurogland.all.N1S.4.early
NvADAMTS-17 : NV2.23275	0	0	-0.376964	neurogland.all.N1S.4
NvADAMTS-17 : NV2.23275	0	0	-0.376964	neurogland.all.NGD.early
NvADAMTS-17 : NV2.23275	0	0	-0.376964	neurogland.all.NGD.1
NvADAMTS-17 : NV2.23275	0.00763766	0.407332	-0.00750533	neurogland.all.SGD.early
NvADAMTS-17 : NV2.23275	0	0	-0.376964	neurogland.all.S1.1
NvADAMTS-17 : NV2.23275	0	0	-0.376964	neurogland.all.S1.2
NvADAMTS-17 : NV2.23275	0	0	-0.376964	neurogland.all.S2.tll.1
NvADAMTS-17 : NV2.23275	0	0	-0.376964	neurogland.all.S2.tll.2
NvADAMTS-17 : NV2.23275	0	0	-0.376964	neurogland.all.S2.tll.3
NvADAMTS-17 : NV2.23275	0	0	-0.376964	neurogland.all.S2.tll.4
NvADAMTS-17 : NV2.23275	0	0	-0.376964	neurogland.all.GD.1
NvADAMTS-17 : NV2.23275	0	0	-0.376964	neurogland.all.GD.2
NvADAMTS-17 : NV2.23275	0	0	-0.376964	neurogland.all.GD.3
NvADAMTS-17 : NV2.23275	0	0	-0.376964	neurogland.all.GD.4
NvADAMTS-17 : NV2.23275	0	0	-0.376964	neurogland.all.GD.5
NvADAMTS-17 : NV2.23275	0	0	-0.376964	neurogland.all.S3
NvADAMTS-17 : NV2.23275	0	0	-0.376964	neurogland.all.N2.g1
NvADAMTS-17 : NV2.23275	0	0	-0.376964	neurogland.all.N2.1
NvADAMTS-17 : NV2.23275	0	0	-0.376964	neurogland.all.N2.2
NvADAMTS-17 : NV2.23275	0	0	-0.376964	neurogland.all.N2.3
NvADAMTS-17 : NV2.23275	0	0	-0.376964	neurogland.all.N2.4
NvADAMTS-17 : NV2.23275	0.085955	2.38095	2.5	neurogland.all.N2.5
NvADAMTS-17 : NV2.23275	0	0	-0.376964	neurogland.all.N2.6
NvADAMTS-17 : NV2.23275	0	0	-0.376964	neurogland.all.N2.7
NvADAMTS-17 : NV2.23275	0.00228586	0.396825	-0.26639	neurogland.all.immune
NvADAMTS-17 : NV2.23275	0.000210246	0.139082	-0.366794	gland.mucous.1.dev.aboral
NvADAMTS-17 : NV2.23275	0	0	-0.376964	gland.mucous.2.dev
NvADAMTS-17 : NV2.23275	0.00530935	0.906344	-0.120133	gland.mucous.3.dev
NvADAMTS-17 : NV2.23275	0	0	-0.376964	gland.mucous.4.dev
NvADAMTS-17 : NV2.23275	0	0	-0.376964	gland.mucous.5.adult
NvADAMTS-17 : NV2.23275	0.0234188	0.239808	0.755879	gland.mucous.6.adult
NvADAMTS-17 : NV2.23275	0	0	-0.376964	gland.mucous.7.adult
NvADAMTS-17 : NV2.23275	0.00155848	0.379147	-0.301576	unchar.immune.1.early.gastrula
NvADAMTS-17 : NV2.23275	0.00142753	0.243309	-0.30791	unchar.immune.2.mid.gastrula
NvADAMTS-17 : NV2.23275	0	0	-0.376964	unchar.immune.3.planula
NvADAMTS-17 : NV2.23275	0	0	-0.376964	unchar.immune.4.mature
NvADAMTS-17 : NV2.23275	0.00204696	0.194175	-0.277946	cnidocyte.pSC
NvADAMTS-17 : NV2.23275	0.00144756	0.271739	-0.306941	cnidocyte.gast.1
NvADAMTS-17 : NV2.23275	0	0	-0.376964	cnidocyte.nem.2
NvADAMTS-17 : NV2.23275	0.00053411	0.120773	-0.351128	cnidocyte.early
NvADAMTS-17 : NV2.23275	0	0	-0.376964	cnidocyte.nep.8
NvADAMTS-17 : NV2.23275	0.00143114	0.840336	-0.307735	cnidocyte.planula.spir
NvADAMTS-17 : NV2.23275	0	0	-0.376964	cnidocyte.spirocyte
NvADAMTS-17 : NV2.23275	0	0	-0.376964	cnidocyte.planula.nem
NvADAMTS-17 : NV2.23275	0	0	-0.376964	cnidocyte.spirocyte.maturing
NvADAMTS-17 : NV2.23275	0	0	-0.376964	cnidocyte.maturing.1
NvADAMTS-17 : NV2.23275	0	0	-0.376964	cnidocyte.planula.mat
NvADAMTS-17 : NV2.23275	0.000488681	0.168634	-0.353325	cnidocyte.nem.1
NvADAMTS-17 : NV2.23275	0.00271404	0.081367	-0.245677	cnidocyte.mature
NvADAMTS-17 : NV2.23275	0	0	-0.376964	retractor muscle.RM.1
NvADAMTS-17 : NV2.23275	0	0	-0.376964	retractor muscle.TR.2
NvADAMTS-17 : NV2.23275	0.0174806	0.970874	0.468632	retractor muscle.TR.1
NvADAMTS-17 : NV2.23275	0	0	-0.376964	retractor muscle.MR.1
NvADAMTS-17 : NV2.23275	0.00894611	2.537	0.0557887	all.gastrodermis.gastrula.1
NvADAMTS-17 : NV2.23275	0.042258	0.394322	1.6672	all.gastrodermis.gastrula.2
NvADAMTS-17 : NV2.23275	0.0415021	9.76645	1.63063	all.gastrodermis.gastrula.3
NvADAMTS-17 : NV2.23275	0.0733511	1.49893	2.5	all.gastrodermis.early.1
NvADAMTS-17 : NV2.23275	0.0998635	19.4223	2.5	all.gastrodermis.early.2
NvADAMTS-17 : NV2.23275	0.00625317	0.159744	-0.0744777	all.gastrodermis.CM
NvADAMTS-17 : NV2.23275	0.0555101	2.57143	2.30825	all.gastrodermis.MR/PM
NvADAMTS-17 : NV2.23275	0.0161829	0.832702	0.405859	all.gastrodermis.gastrodermis
NvADAMTS-17 : NV2.23275	0.0793688	2.32186	2.5	all.gastrodermis.pharyngeal
NvADAMTS-17 : NV2.23275	0.0254611	0.597015	0.854672	all.gastrodermis.ImM
NvADAMTS-17 : NV2.23275	0.0071938	0.438596	-0.0289764	all.gastrodermis.non-muscle
NvADAMTS-17 : NV2.23275	0.0315366	0.970874	1.14856	all.gastrodermis.mesentery
NvADAMTS-17 : NV2.23275	0.10403	1.79641	2.5	all.gastrodermis.neuron
NvADAMTS-17 : NV2.23275	0	0	-0.376964	all.gastrodermis.immune
NvADAMTS-17 : NV2.23275	0.0580155	10.2439	2.42944	all.gastrodermis.gland
NvADAMTS-17 : NV2.23275	0	0	-0.376964	all.gastrodermis.ciliated
NvADAMTS-17 : NV2.23275	0.00242815	0.145349	-0.259507	all.ectoderm.apical organ
NvADAMTS-17 : NV2.23275	0.000179444	0.0643363	-0.368284	all.ectoderm.early.ect.1
NvADAMTS-17 : NV2.23275	0.000780281	0.0498878	-0.339219	all.ectoderm.early.ect.2
NvADAMTS-17 : NV2.23275	0.00223257	0.0804829	-0.268967	all.ectoderm.early.ect.2b
NvADAMTS-17 : NV2.23275	0.00174841	0.169205	-0.292388	all.ectoderm.lip
NvADAMTS-17 : NV2.23275	0.00450312	0.117021	-0.159134	all.ectoderm.pharyng.
NvADAMTS-17 : NV2.23275	0.00573084	0.0636132	-0.0997443	all.ectoderm.epith.1
NvADAMTS-17 : NV2.23275	0.00227912	0.0982855	-0.266715	all.ectoderm.epith.2
NvADAMTS-17 : NV2.23275	0.00540205	0.153081	-0.115649	all.ectoderm.epith.3
NvADAMTS-17 : NV2.23275	0.00575104	0.0618812	-0.0987673	all.ectoderm.epith.4
NvADAMTS-18 : NV2.20821	0.00492422	0.455235	-0.305199	pSC.PGC.Mitotic.1
NvADAMTS-18 : NV2.20821	0.00779127	0.223714	-0.270466	pSC.PGC.Mitotic.2
NvADAMTS-18 : NV2.20821	0.00611979	0.446002	-0.290715	pSC.PGC.NPC
NvADAMTS-18 : NV2.20821	0.00885806	0.590717	-0.257542	pSC.PGC.NPC.g
NvADAMTS-18 : NV2.20821	0	0	-0.364854	pSC.PGC.PGC
NvADAMTS-18 : NV2.20821	0	0	-0.364854	pSC.PGC.primary.oocyte
NvADAMTS-18 : NV2.20821	0.00177812	0.1287	-0.343313	pSC.PGC.spermatagonia
NvADAMTS-18 : NV2.20821	0	0	-0.364854	pSC.PGC.maturing.sperm
NvADAMTS-18 : NV2.20821	0	0	-0.364854	pSC.PGC.maturing.sperm.2
NvADAMTS-18 : NV2.20821	0	0	-0.364854	neurogland.all.S1.L1
NvADAMTS-18 : NV2.20821	0.00198202	1.06383	-0.340843	neurogland.all.N1.L1
NvADAMTS-18 : NV2.20821	0	0	-0.364854	neurogland.all.N1.L2
NvADAMTS-18 : NV2.20821	0	0	-0.364854	neurogland.all.N1.L3
NvADAMTS-18 : NV2.20821	0	0	-0.364854	neurogland.all.N1.g.early
NvADAMTS-18 : NV2.20821	0	0	-0.364854	neurogland.all.N1.g1
NvADAMTS-18 : NV2.20821	0	0	-0.364854	neurogland.all.N1.g2
NvADAMTS-18 : NV2.20821	0	0	-0.364854	neurogland.all.N1.g3
NvADAMTS-18 : NV2.20821	0	0	-0.364854	neurogland.all.N1.g4
NvADAMTS-18 : NV2.20821	0	0	-0.364854	neurogland.all.N1.g5
NvADAMTS-18 : NV2.20821	0	0	-0.364854	neurogland.all.N1.early.1
NvADAMTS-18 : NV2.20821	0.00241397	0.315457	-0.33561	neurogland.all.N1.early.2
NvADAMTS-18 : NV2.20821	0	0	-0.364854	neurogland.all.N1.1
NvADAMTS-18 : NV2.20821	0	0	-0.364854	neurogland.all.N1.2
NvADAMTS-18 : NV2.20821	0.0173585	0.46729	-0.154563	neurogland.all.N1.3
NvADAMTS-18 : NV2.20821	0	0	-0.364854	neurogland.all.N1.4
NvADAMTS-18 : NV2.20821	0	0	-0.364854	neurogland.all.N1.5
NvADAMTS-18 : NV2.20821	0.0404511	0.458716	0.125194	neurogland.all.N1.6
NvADAMTS-18 : NV2.20821	0	0	-0.364854	neurogland.all.N1S.1
NvADAMTS-18 : NV2.20821	0	0	-0.364854	neurogland.all.N1S.2
NvADAMTS-18 : NV2.20821	0	0	-0.364854	neurogland.all.N1S.3
NvADAMTS-18 : NV2.20821	0	0	-0.364854	neurogland.all.N1S.4.early
NvADAMTS-18 : NV2.20821	0.0776088	1.49254	0.575344	neurogland.all.N1S.4
NvADAMTS-18 : NV2.20821	0	0	-0.364854	neurogland.all.NGD.early
NvADAMTS-18 : NV2.20821	0	0	-0.364854	neurogland.all.NGD.1
NvADAMTS-18 : NV2.20821	0.0117695	0.610998	-0.222272	neurogland.all.SGD.early
NvADAMTS-18 : NV2.20821	0.0242252	0.469484	-0.0713762	neurogland.all.S1.1
NvADAMTS-18 : NV2.20821	0	0	-0.364854	neurogland.all.S1.2
NvADAMTS-18 : NV2.20821	0.0103166	0.362319	-0.239873	neurogland.all.S2.tll.1
NvADAMTS-18 : NV2.20821	0	0	-0.364854	neurogland.all.S2.tll.2
NvADAMTS-18 : NV2.20821	0	0	-0.364854	neurogland.all.S2.tll.3
NvADAMTS-18 : NV2.20821	0	0	-0.364854	neurogland.all.S2.tll.4
NvADAMTS-18 : NV2.20821	0	0	-0.364854	neurogland.all.GD.1
NvADAMTS-18 : NV2.20821	0.0584922	1.44928	0.343755	neurogland.all.GD.2
NvADAMTS-18 : NV2.20821	0	0	-0.364854	neurogland.all.GD.3
NvADAMTS-18 : NV2.20821	0.0479822	0.990099	0.21643	neurogland.all.GD.4
NvADAMTS-18 : NV2.20821	0	0	-0.364854	neurogland.all.GD.5
NvADAMTS-18 : NV2.20821	0	0	-0.364854	neurogland.all.S3
NvADAMTS-18 : NV2.20821	0	0	-0.364854	neurogland.all.N2.g1
NvADAMTS-18 : NV2.20821	0.0102004	0.520833	-0.24128	neurogland.all.N2.1
NvADAMTS-18 : NV2.20821	0	0	-0.364854	neurogland.all.N2.2
NvADAMTS-18 : NV2.20821	0.0150383	1.28205	-0.182671	neurogland.all.N2.3
NvADAMTS-18 : NV2.20821	0.00916738	0.662252	-0.253795	neurogland.all.N2.4
NvADAMTS-18 : NV2.20821	0	0	-0.364854	neurogland.all.N2.5
NvADAMTS-18 : NV2.20821	0	0	-0.364854	neurogland.all.N2.6
NvADAMTS-18 : NV2.20821	0	0	-0.364854	neurogland.all.N2.7
NvADAMTS-18 : NV2.20821	0.00470953	0.396825	-0.3078	neurogland.all.immune
NvADAMTS-18 : NV2.20821	0.0317313	0.69541	0.019558	gland.mucous.1.dev.aboral
NvADAMTS-18 : NV2.20821	0.0242123	1.5625	-0.0715315	gland.mucous.2.dev
NvADAMTS-18 : NV2.20821	0	0	-0.364854	gland.mucous.3.dev
NvADAMTS-18 : NV2.20821	0	0	-0.364854	gland.mucous.4.dev
NvADAMTS-18 : NV2.20821	0.00672911	0.414079	-0.283334	gland.mucous.5.adult
NvADAMTS-18 : NV2.20821	0	0	-0.364854	gland.mucous.6.adult
NvADAMTS-18 : NV2.20821	0	0	-0.364854	gland.mucous.7.adult
NvADAMTS-18 : NV2.20821	0.000493065	0.0947867	-0.358881	unchar.immune.1.early.gastrula
NvADAMTS-18 : NV2.20821	0.00346782	0.486618	-0.322843	unchar.immune.2.mid.gastrula
NvADAMTS-18 : NV2.20821	0.0120543	0.391389	-0.218822	unchar.immune.3.planula
NvADAMTS-18 : NV2.20821	0.0113372	0.25974	-0.227509	unchar.immune.4.mature
NvADAMTS-18 : NV2.20821	0.00323039	0.582524	-0.325719	cnidocyte.pSC
NvADAMTS-18 : NV2.20821	0.0118724	1.7663	-0.221025	cnidocyte.gast.1
NvADAMTS-18 : NV2.20821	0.0186566	0.739372	-0.138837	cnidocyte.nem.2
NvADAMTS-18 : NV2.20821	0.0197034	1.3285	-0.126155	cnidocyte.early
NvADAMTS-18 : NV2.20821	0	0	-0.364854	cnidocyte.nep.8
NvADAMTS-18 : NV2.20821	0	0	-0.364854	cnidocyte.planula.spir
NvADAMTS-18 : NV2.20821	0	0	-0.364854	cnidocyte.spirocyte
NvADAMTS-18 : NV2.20821	0	0	-0.364854	cnidocyte.planula.nem
NvADAMTS-18 : NV2.20821	0	0	-0.364854	cnidocyte.spirocyte.maturing
NvADAMTS-18 : NV2.20821	0.019607	0.689655	-0.127324	cnidocyte.maturing.1
NvADAMTS-18 : NV2.20821	0	0	-0.364854	cnidocyte.planula.mat
NvADAMTS-18 : NV2.20821	0.00829131	0.674536	-0.264408	cnidocyte.nem.1
NvADAMTS-18 : NV2.20821	0	0	-0.364854	cnidocyte.mature
NvADAMTS-18 : NV2.20821	0.0130137	0.597015	-0.207198	retractor muscle.RM.1
NvADAMTS-18 : NV2.20821	0.0217438	0.816327	-0.101437	retractor muscle.TR.2
NvADAMTS-18 : NV2.20821	0.0246665	0.970874	-0.0660295	retractor muscle.TR.1
NvADAMTS-18 : NV2.20821	0	0	-0.364854	retractor muscle.MR.1
NvADAMTS-18 : NV2.20821	0.253467	37.6321	2.5	all.gastrodermis.gastrula.1
NvADAMTS-18 : NV2.20821	0.154516	3.47003	1.50705	all.gastrodermis.gastrula.2
NvADAMTS-18 : NV2.20821	0.357383	50.1062	2.5	all.gastrodermis.gastrula.3
NvADAMTS-18 : NV2.20821	0.217849	3.06924	2.2743	all.gastrodermis.early.1
NvADAMTS-18 : NV2.20821	0.207207	26.992	2.14538	all.gastrodermis.early.2
NvADAMTS-18 : NV2.20821	0.304529	3.51438	2.5	all.gastrodermis.CM
NvADAMTS-18 : NV2.20821	0.0335306	1.57143	0.0413556	all.gastrodermis.MR/PM
NvADAMTS-18 : NV2.20821	0.152493	5.52612	1.48253	all.gastrodermis.gastrodermis
NvADAMTS-18 : NV2.20821	0.19856	4.80384	2.04062	all.gastrodermis.pharyngeal
NvADAMTS-18 : NV2.20821	0.00342325	0.298507	-0.323383	all.gastrodermis.ImM
NvADAMTS-18 : NV2.20821	0.0755795	2.33918	0.55076	all.gastrodermis.non-muscle
NvADAMTS-18 : NV2.20821	0.029783	0.970874	-0.00404574	all.gastrodermis.mesentery
NvADAMTS-18 : NV2.20821	0.0261765	1.79641	-0.0477365	all.gastrodermis.neuron
NvADAMTS-18 : NV2.20821	0	0	-0.364854	all.gastrodermis.immune
NvADAMTS-18 : NV2.20821	0.590064	39.0244	2.5	all.gastrodermis.gland
NvADAMTS-18 : NV2.20821	0.0644149	3.7594	0.415506	all.gastrodermis.ciliated
NvADAMTS-18 : NV2.20821	0.0072992	0.581395	-0.276427	all.ectoderm.apical organ
NvADAMTS-18 : NV2.20821	0.000702889	0.171563	-0.356339	all.ectoderm.early.ect.1
NvADAMTS-18 : NV2.20821	0.000414794	0.0748316	-0.359829	all.ectoderm.early.ect.2
NvADAMTS-18 : NV2.20821	0.00460428	0.0402414	-0.309075	all.ectoderm.early.ect.2b
NvADAMTS-18 : NV2.20821	0.0022969	0.592217	-0.337028	all.ectoderm.lip
NvADAMTS-18 : NV2.20821	0.00853358	0.234043	-0.261473	all.ectoderm.pharyng.
NvADAMTS-18 : NV2.20821	0.0109387	0.139949	-0.232336	all.ectoderm.epith.1
NvADAMTS-18 : NV2.20821	0.00841985	0.251174	-0.262851	all.ectoderm.epith.2
NvADAMTS-18 : NV2.20821	0.00300811	0.229621	-0.328412	all.ectoderm.epith.3
NvADAMTS-18 : NV2.20821	0.00566983	0.309406	-0.296166	all.ectoderm.epith.4
NvADAMTS-19 : NV2.87	0.00591042	0.682853	-0.256507	pSC.PGC.Mitotic.1
NvADAMTS-19 : NV2.87	0.00402079	0.559284	-0.332862	pSC.PGC.Mitotic.2
NvADAMTS-19 : NV2.87	0.00620297	0.382287	-0.244685	pSC.PGC.NPC
NvADAMTS-19 : NV2.87	0.00794366	0.675105	-0.174348	pSC.PGC.NPC.g
NvADAMTS-19 : NV2.87	0	0	-0.495333	pSC.PGC.PGC
NvADAMTS-19 : NV2.87	0	0	-0.495333	pSC.PGC.primary.oocyte
NvADAMTS-19 : NV2.87	0.0183102	1.0296	0.244541	pSC.PGC.spermatagonia
NvADAMTS-19 : NV2.87	0	0	-0.495333	pSC.PGC.maturing.sperm
NvADAMTS-19 : NV2.87	0	0	-0.495333	pSC.PGC.maturing.sperm.2
NvADAMTS-19 : NV2.87	0	0	-0.495333	neurogland.all.S1.L1
NvADAMTS-19 : NV2.87	0	0	-0.495333	neurogland.all.N1.L1
NvADAMTS-19 : NV2.87	0	0	-0.495333	neurogland.all.N1.L2
NvADAMTS-19 : NV2.87	0	0	-0.495333	neurogland.all.N1.L3
NvADAMTS-19 : NV2.87	0	0	-0.495333	neurogland.all.N1.g.early
NvADAMTS-19 : NV2.87	0	0	-0.495333	neurogland.all.N1.g1
NvADAMTS-19 : NV2.87	0	0	-0.495333	neurogland.all.N1.g2
NvADAMTS-19 : NV2.87	0	0	-0.495333	neurogland.all.N1.g3
NvADAMTS-19 : NV2.87	0	0	-0.495333	neurogland.all.N1.g4
NvADAMTS-19 : NV2.87	0	0	-0.495333	neurogland.all.N1.g5
NvADAMTS-19 : NV2.87	0	0	-0.495333	neurogland.all.N1.early.1
NvADAMTS-19 : NV2.87	0	0	-0.495333	neurogland.all.N1.early.2
NvADAMTS-19 : NV2.87	0	0	-0.495333	neurogland.all.N1.1
NvADAMTS-19 : NV2.87	0	0	-0.495333	neurogland.all.N1.2
NvADAMTS-19 : NV2.87	0	0	-0.495333	neurogland.all.N1.3
NvADAMTS-19 : NV2.87	0	0	-0.495333	neurogland.all.N1.4
NvADAMTS-19 : NV2.87	0	0	-0.495333	neurogland.all.N1.5
NvADAMTS-19 : NV2.87	0.0134207	0.917431	0.0469658	neurogland.all.N1.6
NvADAMTS-19 : NV2.87	0	0	-0.495333	neurogland.all.N1S.1
NvADAMTS-19 : NV2.87	0.0152853	0.403226	0.12231	neurogland.all.N1S.2
NvADAMTS-19 : NV2.87	0	0	-0.495333	neurogland.all.N1S.3
NvADAMTS-19 : NV2.87	0.0305355	2.94118	0.738534	neurogland.all.N1S.4.early
NvADAMTS-19 : NV2.87	0.00551077	0.497512	-0.272655	neurogland.all.N1S.4
NvADAMTS-19 : NV2.87	0	0	-0.495333	neurogland.all.NGD.early
NvADAMTS-19 : NV2.87	0.098631	1.96078	2.5	neurogland.all.NGD.1
NvADAMTS-19 : NV2.87	0.00334015	0.610998	-0.360365	neurogland.all.SGD.early
NvADAMTS-19 : NV2.87	0	0	-0.495333	neurogland.all.S1.1
NvADAMTS-19 : NV2.87	0.00159689	0.460829	-0.430806	neurogland.all.S1.2
NvADAMTS-19 : NV2.87	0	0	-0.495333	neurogland.all.S2.tll.1
NvADAMTS-19 : NV2.87	0	0	-0.495333	neurogland.all.S2.tll.2
NvADAMTS-19 : NV2.87	0	0	-0.495333	neurogland.all.S2.tll.3
NvADAMTS-19 : NV2.87	0	0	-0.495333	neurogland.all.S2.tll.4
NvADAMTS-19 : NV2.87	0	0	-0.495333	neurogland.all.GD.1
NvADAMTS-19 : NV2.87	0	0	-0.495333	neurogland.all.GD.2
NvADAMTS-19 : NV2.87	0.0196078	0.588235	0.296974	neurogland.all.GD.3
NvADAMTS-19 : NV2.87	0.0276873	0.49505	0.623447	neurogland.all.GD.4
NvADAMTS-19 : NV2.87	0	0	-0.495333	neurogland.all.GD.5
NvADAMTS-19 : NV2.87	0	0	-0.495333	neurogland.all.S3
NvADAMTS-19 : NV2.87	0	0	-0.495333	neurogland.all.N2.g1
NvADAMTS-19 : NV2.87	0.056925	2.08333	1.80487	neurogland.all.N2.1
NvADAMTS-19 : NV2.87	0	0	-0.495333	neurogland.all.N2.2
NvADAMTS-19 : NV2.87	0	0	-0.495333	neurogland.all.N2.3
NvADAMTS-19 : NV2.87	0.0132239	0.662252	0.039013	neurogland.all.N2.4
NvADAMTS-19 : NV2.87	0	0	-0.495333	neurogland.all.N2.5
NvADAMTS-19 : NV2.87	0	0	-0.495333	neurogland.all.N2.6
NvADAMTS-19 : NV2.87	0	0	-0.495333	neurogland.all.N2.7
NvADAMTS-19 : NV2.87	0.00472067	0.793651	-0.304582	neurogland.all.immune
NvADAMTS-19 : NV2.87	0	0	-0.495333	gland.mucous.1.dev.aboral
NvADAMTS-19 : NV2.87	0.00036726	0.390625	-0.480493	gland.mucous.2.dev
NvADAMTS-19 : NV2.87	0	0	-0.495333	gland.mucous.3.dev
NvADAMTS-19 : NV2.87	0	0	-0.495333	gland.mucous.4.dev
NvADAMTS-19 : NV2.87	0.00359069	0.207039	-0.350241	gland.mucous.5.adult
NvADAMTS-19 : NV2.87	0	0	-0.495333	gland.mucous.6.adult
NvADAMTS-19 : NV2.87	0	0	-0.495333	gland.mucous.7.adult
NvADAMTS-19 : NV2.87	0.000333827	0.0947867	-0.481844	unchar.immune.1.early.gastrula
NvADAMTS-19 : NV2.87	0.00622719	0.729927	-0.243707	unchar.immune.2.mid.gastrula
NvADAMTS-19 : NV2.87	0.0042635	0.195695	-0.323055	unchar.immune.3.planula
NvADAMTS-19 : NV2.87	0.000885156	0.12987	-0.459566	unchar.immune.4.mature
NvADAMTS-19 : NV2.87	0.00726499	0.970874	-0.201772	cnidocyte.pSC
NvADAMTS-19 : NV2.87	0.00351938	0.407609	-0.353123	cnidocyte.gast.1
NvADAMTS-19 : NV2.87	0.0206386	1.47874	0.338626	cnidocyte.nem.2
NvADAMTS-19 : NV2.87	0.0266625	3.38164	0.582036	cnidocyte.early
NvADAMTS-19 : NV2.87	0.0037855	0.970874	-0.34237	cnidocyte.nep.8
NvADAMTS-19 : NV2.87	0.0239173	4.20168	0.471109	cnidocyte.planula.spir
NvADAMTS-19 : NV2.87	0	0	-0.495333	cnidocyte.spirocyte
NvADAMTS-19 : NV2.87	0	0	-0.495333	cnidocyte.planula.nem
NvADAMTS-19 : NV2.87	0	0	-0.495333	cnidocyte.spirocyte.maturing
NvADAMTS-19 : NV2.87	0	0	-0.495333	cnidocyte.maturing.1
NvADAMTS-19 : NV2.87	0	0	-0.495333	cnidocyte.planula.mat
NvADAMTS-19 : NV2.87	0.00279032	0.84317	-0.382583	cnidocyte.nem.1
NvADAMTS-19 : NV2.87	0.000130517	0.081367	-0.490059	cnidocyte.mature
NvADAMTS-19 : NV2.87	0.0261352	0.895522	0.560728	retractor muscle.RM.1
NvADAMTS-19 : NV2.87	0.0183261	1.63265	0.245181	retractor muscle.TR.2
NvADAMTS-19 : NV2.87	0.0265266	0.970874	0.576545	retractor muscle.TR.1
NvADAMTS-19 : NV2.87	0.0114636	1.24481	-0.032115	retractor muscle.MR.1
NvADAMTS-19 : NV2.87	0.0102503	2.537	-0.0811429	all.gastrodermis.gastrula.1
NvADAMTS-19 : NV2.87	0	0	-0.495333	all.gastrodermis.gastrula.2
NvADAMTS-19 : NV2.87	0.0105999	2.9724	-0.0670162	all.gastrodermis.gastrula.3
NvADAMTS-19 : NV2.87	0.0900337	1.2848	2.5	all.gastrodermis.early.1
NvADAMTS-19 : NV2.87	0.0563184	10.8566	1.78036	all.gastrodermis.early.2
NvADAMTS-19 : NV2.87	0.0890174	0.798722	2.5	all.gastrodermis.CM
NvADAMTS-19 : NV2.87	0.0792602	3.71429	2.5	all.gastrodermis.MR/PM
NvADAMTS-19 : NV2.87	0.0408922	1.96821	1.15703	all.gastrodermis.gastrodermis
NvADAMTS-19 : NV2.87	0.0448282	1.44115	1.31607	all.gastrodermis.pharyngeal
NvADAMTS-19 : NV2.87	0.143396	5.67164	2.5	all.gastrodermis.ImM
NvADAMTS-19 : NV2.87	0.0241549	0.877193	0.48071	all.gastrodermis.non-muscle
NvADAMTS-19 : NV2.87	0.07104	1.94175	2.37523	all.gastrodermis.mesentery
NvADAMTS-19 : NV2.87	0	0	-0.495333	all.gastrodermis.neuron
NvADAMTS-19 : NV2.87	0	0	-0.495333	all.gastrodermis.immune
NvADAMTS-19 : NV2.87	0.076264	11.7073	2.5	all.gastrodermis.gland
NvADAMTS-19 : NV2.87	0.0398549	1.50376	1.11511	all.gastrodermis.ciliated
NvADAMTS-19 : NV2.87	0.000999786	0.145349	-0.454934	all.ectoderm.apical organ
NvADAMTS-19 : NV2.87	0.00157913	0.27879	-0.431524	all.ectoderm.early.ect.1
NvADAMTS-19 : NV2.87	0.00291746	0.399102	-0.377445	all.ectoderm.early.ect.2
NvADAMTS-19 : NV2.87	0.00500237	0.0804829	-0.293199	all.ectoderm.early.ect.2b
NvADAMTS-19 : NV2.87	0.0121497	1.18443	-0.00439209	all.ectoderm.lip
NvADAMTS-19 : NV2.87	0.00994366	0.361702	-0.0935328	all.ectoderm.pharyng.
NvADAMTS-19 : NV2.87	0.00370247	0.0763359	-0.345725	all.ectoderm.epith.1
NvADAMTS-19 : NV2.87	0.00428295	0.196571	-0.322269	all.ectoderm.epith.2
NvADAMTS-19 : NV2.87	0.00629284	0.191351	-0.241054	all.ectoderm.epith.3
NvADAMTS-19 : NV2.87	0.00594129	0.185644	-0.255259	all.ectoderm.epith.4
NvADAMTS-2 : NV2.17494	0.00839298	0.0758725	-0.150001	pSC.PGC.Mitotic.1
NvADAMTS-2 : NV2.17494	0.0117606	0.223714	-0.14166	pSC.PGC.Mitotic.2
NvADAMTS-2 : NV2.17494	0.0309255	1.75215	-0.0941913	pSC.PGC.NPC
NvADAMTS-2 : NV2.17494	0.0132225	1.01266	-0.138039	pSC.PGC.NPC.g
NvADAMTS-2 : NV2.17494	0	0	-0.170789	pSC.PGC.PGC
NvADAMTS-2 : NV2.17494	0	0	-0.170789	pSC.PGC.primary.oocyte
NvADAMTS-2 : NV2.17494	0	0	-0.170789	pSC.PGC.spermatagonia
NvADAMTS-2 : NV2.17494	0	0	-0.170789	pSC.PGC.maturing.sperm
NvADAMTS-2 : NV2.17494	0	0	-0.170789	pSC.PGC.maturing.sperm.2
NvADAMTS-2 : NV2.17494	0.0574285	6.74157	-0.0285475	neurogland.all.S1.L1
NvADAMTS-2 : NV2.17494	0.0152411	1.06383	-0.133039	neurogland.all.N1.L1
NvADAMTS-2 : NV2.17494	0.0201305	2.45098	-0.120929	neurogland.all.N1.L2
NvADAMTS-2 : NV2.17494	0.00661395	0.52356	-0.154407	neurogland.all.N1.L3
NvADAMTS-2 : NV2.17494	0	0	-0.170789	neurogland.all.N1.g.early
NvADAMTS-2 : NV2.17494	0	0	-0.170789	neurogland.all.N1.g1
NvADAMTS-2 : NV2.17494	0	0	-0.170789	neurogland.all.N1.g2
NvADAMTS-2 : NV2.17494	0.0257104	0.766284	-0.107108	neurogland.all.N1.g3
NvADAMTS-2 : NV2.17494	0	0	-0.170789	neurogland.all.N1.g4
NvADAMTS-2 : NV2.17494	0	0	-0.170789	neurogland.all.N1.g5
NvADAMTS-2 : NV2.17494	0	0	-0.170789	neurogland.all.N1.early.1
NvADAMTS-2 : NV2.17494	0	0	-0.170789	neurogland.all.N1.early.2
NvADAMTS-2 : NV2.17494	0.0041549	0.332226	-0.160498	neurogland.all.N1.1
NvADAMTS-2 : NV2.17494	0.311874	5.45455	0.601672	neurogland.all.N1.2
NvADAMTS-2 : NV2.17494	0.069932	0.934579	0.00242162	neurogland.all.N1.3
NvADAMTS-2 : NV2.17494	0.0311892	1.72414	-0.0935382	neurogland.all.N1.4
NvADAMTS-2 : NV2.17494	0	0	-0.170789	neurogland.all.N1.5
NvADAMTS-2 : NV2.17494	0.00952878	0.458716	-0.147188	neurogland.all.N1.6
NvADAMTS-2 : NV2.17494	0	0	-0.170789	neurogland.all.N1S.1
NvADAMTS-2 : NV2.17494	0.0134858	0.403226	-0.137387	neurogland.all.N1S.2
NvADAMTS-2 : NV2.17494	0	0	-0.170789	neurogland.all.N1S.3
NvADAMTS-2 : NV2.17494	0	0	-0.170789	neurogland.all.N1S.4.early
NvADAMTS-2 : NV2.17494	0	0	-0.170789	neurogland.all.N1S.4
NvADAMTS-2 : NV2.17494	0	0	-0.170789	neurogland.all.NGD.early
NvADAMTS-2 : NV2.17494	0	0	-0.170789	neurogland.all.NGD.1
NvADAMTS-2 : NV2.17494	0.0118015	0.814664	-0.141558	neurogland.all.SGD.early
NvADAMTS-2 : NV2.17494	2.44393	7.98122	2.5	neurogland.all.S1.1
NvADAMTS-2 : NV2.17494	3.47835	22.5806	2.5	neurogland.all.S1.2
NvADAMTS-2 : NV2.17494	0.00641159	0.362319	-0.154908	neurogland.all.S2.tll.1
NvADAMTS-2 : NV2.17494	0	0	-0.170789	neurogland.all.S2.tll.2
NvADAMTS-2 : NV2.17494	0	0	-0.170789	neurogland.all.S2.tll.3
NvADAMTS-2 : NV2.17494	0	0	-0.170789	neurogland.all.S2.tll.4
NvADAMTS-2 : NV2.17494	0	0	-0.170789	neurogland.all.GD.1
NvADAMTS-2 : NV2.17494	0	0	-0.170789	neurogland.all.GD.2
NvADAMTS-2 : NV2.17494	0.00883748	1.17647	-0.1489	neurogland.all.GD.3
NvADAMTS-2 : NV2.17494	0	0	-0.170789	neurogland.all.GD.4
NvADAMTS-2 : NV2.17494	0.136098	3.57143	0.166303	neurogland.all.GD.5
NvADAMTS-2 : NV2.17494	0	0	-0.170789	neurogland.all.S3
NvADAMTS-2 : NV2.17494	0	0	-0.170789	neurogland.all.N2.g1
NvADAMTS-2 : NV2.17494	0.230942	6.77083	0.401217	neurogland.all.N2.1
NvADAMTS-2 : NV2.17494	0.136091	3.3557	0.166288	neurogland.all.N2.2
NvADAMTS-2 : NV2.17494	0.0565493	0.854701	-0.0307252	neurogland.all.N2.3
NvADAMTS-2 : NV2.17494	0	0	-0.170789	neurogland.all.N2.4
NvADAMTS-2 : NV2.17494	0	0	-0.170789	neurogland.all.N2.5
NvADAMTS-2 : NV2.17494	0	0	-0.170789	neurogland.all.N2.6
NvADAMTS-2 : NV2.17494	0	0	-0.170789	neurogland.all.N2.7
NvADAMTS-2 : NV2.17494	0.0884301	3.57143	0.0482385	neurogland.all.immune
NvADAMTS-2 : NV2.17494	0	0	-0.170789	gland.mucous.1.dev.aboral
NvADAMTS-2 : NV2.17494	0.0265989	2.73438	-0.104908	gland.mucous.2.dev
NvADAMTS-2 : NV2.17494	0.00997836	1.51057	-0.146074	gland.mucous.3.dev
NvADAMTS-2 : NV2.17494	0	0	-0.170789	gland.mucous.4.dev
NvADAMTS-2 : NV2.17494	0	0	-0.170789	gland.mucous.5.adult
NvADAMTS-2 : NV2.17494	0.0122727	0.239808	-0.140391	gland.mucous.6.adult
NvADAMTS-2 : NV2.17494	0	0	-0.170789	gland.mucous.7.adult
NvADAMTS-2 : NV2.17494	0	0	-0.170789	unchar.immune.1.early.gastrula
NvADAMTS-2 : NV2.17494	0.00543276	0.729927	-0.157333	unchar.immune.2.mid.gastrula
NvADAMTS-2 : NV2.17494	0.0235915	0.391389	-0.112356	unchar.immune.3.planula
NvADAMTS-2 : NV2.17494	0.000650782	0.12987	-0.169177	unchar.immune.4.mature
NvADAMTS-2 : NV2.17494	0	0	-0.170789	cnidocyte.pSC
NvADAMTS-2 : NV2.17494	0.0137263	0.271739	-0.136791	cnidocyte.gast.1
NvADAMTS-2 : NV2.17494	0	0	-0.170789	cnidocyte.nem.2
NvADAMTS-2 : NV2.17494	0.000137173	0.120773	-0.170449	cnidocyte.early
NvADAMTS-2 : NV2.17494	0.0302508	0.970874	-0.0958625	cnidocyte.nep.8
NvADAMTS-2 : NV2.17494	0.0112758	1.68067	-0.14286	cnidocyte.planula.spir
NvADAMTS-2 : NV2.17494	0.0304954	0.387597	-0.0952565	cnidocyte.spirocyte
NvADAMTS-2 : NV2.17494	0	0	-0.170789	cnidocyte.planula.nem
NvADAMTS-2 : NV2.17494	0	0	-0.170789	cnidocyte.spirocyte.maturing
NvADAMTS-2 : NV2.17494	0.034954	0.689655	-0.0842135	cnidocyte.maturing.1
NvADAMTS-2 : NV2.17494	0.015313	2.77778	-0.132861	cnidocyte.planula.mat
NvADAMTS-2 : NV2.17494	0	0	-0.170789	cnidocyte.nem.1
NvADAMTS-2 : NV2.17494	0.00224832	0.406835	-0.16522	cnidocyte.mature
NvADAMTS-2 : NV2.17494	0	0	-0.170789	retractor muscle.RM.1
NvADAMTS-2 : NV2.17494	0	0	-0.170789	retractor muscle.TR.2
NvADAMTS-2 : NV2.17494	0	0	-0.170789	retractor muscle.TR.1
NvADAMTS-2 : NV2.17494	0	0	-0.170789	retractor muscle.MR.1
NvADAMTS-2 : NV2.17494	0	0	-0.170789	all.gastrodermis.gastrula.1
NvADAMTS-2 : NV2.17494	0	0	-0.170789	all.gastrodermis.gastrula.2
NvADAMTS-2 : NV2.17494	0.000744805	0.212314	-0.168944	all.gastrodermis.gastrula.3
NvADAMTS-2 : NV2.17494	0	0	-0.170789	all.gastrodermis.early.1
NvADAMTS-2 : NV2.17494	0.000249703	0.0996016	-0.17017	all.gastrodermis.early.2
NvADAMTS-2 : NV2.17494	0	0	-0.170789	all.gastrodermis.CM
NvADAMTS-2 : NV2.17494	0.0271653	0.714286	-0.103505	all.gastrodermis.MR/PM
NvADAMTS-2 : NV2.17494	0.00993623	0.378501	-0.146178	all.gastrodermis.gastrodermis
NvADAMTS-2 : NV2.17494	0.00301048	0.160128	-0.163332	all.gastrodermis.pharyngeal
NvADAMTS-2 : NV2.17494	0.0202241	0.298507	-0.120697	all.gastrodermis.ImM
NvADAMTS-2 : NV2.17494	0.0079232	0.146199	-0.151164	all.gastrodermis.non-muscle
NvADAMTS-2 : NV2.17494	0	0	-0.170789	all.gastrodermis.mesentery
NvADAMTS-2 : NV2.17494	0	0	-0.170789	all.gastrodermis.neuron
NvADAMTS-2 : NV2.17494	0.0270599	0.763359	-0.103766	all.gastrodermis.immune
NvADAMTS-2 : NV2.17494	0	0	-0.170789	all.gastrodermis.gland
NvADAMTS-2 : NV2.17494	0	0	-0.170789	all.gastrodermis.ciliated
NvADAMTS-2 : NV2.17494	0	0	-0.170789	all.ectoderm.apical organ
NvADAMTS-2 : NV2.17494	0.000403754	0.107227	-0.169789	all.ectoderm.early.ect.1
NvADAMTS-2 : NV2.17494	0.000570821	0.0748316	-0.169375	all.ectoderm.early.ect.2
NvADAMTS-2 : NV2.17494	0	0	-0.170789	all.ectoderm.early.ect.2b
NvADAMTS-2 : NV2.17494	0	0	-0.170789	all.ectoderm.lip
NvADAMTS-2 : NV2.17494	0.0189117	0.340426	-0.123948	all.ectoderm.pharyng.
NvADAMTS-2 : NV2.17494	0.00315252	0.0381679	-0.162981	all.ectoderm.epith.1
NvADAMTS-2 : NV2.17494	0.00309169	0.0655236	-0.163131	all.ectoderm.epith.2
NvADAMTS-2 : NV2.17494	0.0185767	0.344432	-0.124777	all.ectoderm.epith.3
NvADAMTS-2 : NV2.17494	0	0	-0.170789	all.ectoderm.epith.4
NvADAMTS-20 : NV2.22999	0.153203	13.0501	0.220841	pSC.PGC.Mitotic.1
NvADAMTS-20 : NV2.22999	0.111438	10.8501	0.0815119	pSC.PGC.Mitotic.2
NvADAMTS-20 : NV2.22999	0.0650251	4.93788	-0.0733228	pSC.PGC.NPC
NvADAMTS-20 : NV2.22999	0.0255896	2.27848	-0.204881	pSC.PGC.NPC.g
NvADAMTS-20 : NV2.22999	0.0385582	2.17391	-0.161617	pSC.PGC.PGC
NvADAMTS-20 : NV2.22999	0	0	-0.290248	pSC.PGC.primary.oocyte
NvADAMTS-20 : NV2.22999	0.0168547	1.1583	-0.23402	pSC.PGC.spermatagonia
NvADAMTS-20 : NV2.22999	0.00393682	0.434783	-0.277115	pSC.PGC.maturing.sperm
NvADAMTS-20 : NV2.22999	0	0	-0.290248	pSC.PGC.maturing.sperm.2
NvADAMTS-20 : NV2.22999	0	0	-0.290248	neurogland.all.S1.L1
NvADAMTS-20 : NV2.22999	0	0	-0.290248	neurogland.all.N1.L1
NvADAMTS-20 : NV2.22999	0.0246	1.47059	-0.208182	neurogland.all.N1.L2
NvADAMTS-20 : NV2.22999	0	0	-0.290248	neurogland.all.N1.L3
NvADAMTS-20 : NV2.22999	0	0	-0.290248	neurogland.all.N1.g.early
NvADAMTS-20 : NV2.22999	0.0663441	2.14286	-0.0689226	neurogland.all.N1.g1
NvADAMTS-20 : NV2.22999	0	0	-0.290248	neurogland.all.N1.g2
NvADAMTS-20 : NV2.22999	0.0185524	0.766284	-0.228357	neurogland.all.N1.g3
NvADAMTS-20 : NV2.22999	0	0	-0.290248	neurogland.all.N1.g4
[truncated: 89,302 more rows]

## Sheet: MatrisomeExpression.lifecycle
Table S4. Gene expression profiles indicating the average expression (avg.exp), the percentage of the cells with gene expression (pct.exp), and the relative expression levels (avg.exp.scaled) for all ECM genes across all cell state identities (cell.state.id) in Cole et al. 2024 Frontiers in Zoology, with the cell states separated by life cycle stages used in the current paper: larva, primary poly…
gene	avg.exp	pct.exp	avg.exp.scaled	cell.state.id
NvCol4b : NV2.21409	0.283456	25.084	7	pSC.PGC.Mitotic.1_larvae
NvNCol-3 : NV2.10686	0.166936	11.6461	6	pSC.PGC.Mitotic.1_larvae
NvTSPEAR : NV2.8096	0.199137	21.6125	8	pSC.PGC.Mitotic.1_larvae
NvCol6-like-1 : NV2.23164	0	0	7	pSC.PGC.Mitotic.1_larvae
NvCol6-like-2 : NV2.23710	0	0	7	pSC.PGC.Mitotic.1_larvae
NvCol6-like-3 : NV2.24229	0.00456531	0.447928	7	pSC.PGC.Mitotic.1_larvae
NvCol6-like-4 : NV2.14089	0	0	7	pSC.PGC.Mitotic.1_larvae
NvCol18 : NV2.11420	0.0695502	8.51064	11	pSC.PGC.Mitotic.1_larvae
NvColIg : NV2.9101	0.00645703	0.671892	7	pSC.PGC.Mitotic.1_larvae
NvCTHRC : NV2.2667	0	0	7	pSC.PGC.Mitotic.1_larvae
NvCol4 : NV2.21411	0.0122385	1.34378	6	pSC.PGC.Mitotic.1_larvae
NvCol-7 : NV2.24375	0.00490014	0.447928	6	pSC.PGC.Mitotic.1_larvae
NvCol-like-1 : NV2.5987	0	0	6	pSC.PGC.Mitotic.1_larvae
NvCol-like-10 : NV2.13883	0	0	7	pSC.PGC.Mitotic.1_larvae
NvCol-like-2 : NV2.19801	0.00580789	1.00784	9	pSC.PGC.Mitotic.1_larvae
NvCol-like-3 : NV2.21821	0	0	6	pSC.PGC.Mitotic.1_larvae
NvCol-like-4 : NV2.21793	0.000506248	0.111982	7	pSC.PGC.Mitotic.1_larvae
NvCol-like-5 : NV2.19798	0.130295	14.1097	20	pSC.PGC.Mitotic.1_larvae
NvCol-like-6 : NV2.19811	0.0202045	2.91153	8	pSC.PGC.Mitotic.1_larvae
NvCol-like-7 : NV2.20296	0	0	6	pSC.PGC.Mitotic.1_larvae
NvCol-like-8 : NV2.7052	0	0	7	pSC.PGC.Mitotic.1_larvae
NvCol-like-9 : NV2.8768	0	0	7	pSC.PGC.Mitotic.1_larvae
NvCol1a : NV2.24535	0.00314983	0.447928	6	pSC.PGC.Mitotic.1_larvae
NvCol1b : NV2.11872	0.00146076	0.111982	6	pSC.PGC.Mitotic.1_larvae
NvCol1c : NV2.12027	0.0268986	3.1355	6	pSC.PGC.Mitotic.1_larvae
NvCol2a : NV2.12159	0.0305649	3.69541	8	pSC.PGC.Mitotic.1_larvae
NvCol2b : NV2.12104	0.0152307	2.23964	6	pSC.PGC.Mitotic.1_larvae
NvCol5 : NV2.24536	0.122585	11.5342	8	pSC.PGC.Mitotic.1_larvae
NvCol2c : NV2.10959	0.00504567	0.55991	6	pSC.PGC.Mitotic.1_larvae
NvNCol-7 : NV2.11814	0.0152306	1.79171	6	pSC.PGC.Mitotic.1_larvae
NvNCol1 : NV2.12621	0.0327535	3.69541	7	pSC.PGC.Mitotic.1_larvae
NvNCol4 : NV2.11801	0.0488258	4.59127	7	pSC.PGC.Mitotic.1_larvae
NvNCol5 : NV2.11802	0.173781	18.2531	7	pSC.PGC.Mitotic.1_larvae
NvNCol6 : NV2.11815	0.207021	17.5812	7	pSC.PGC.Mitotic.1_larvae
NvNCol-like 1 : NV2.363	0.0250925	1.34378	7	pSC.PGC.Mitotic.1_larvae
NvNCol-like 3 : NV2.11816	0.0742524	7.61478	7	pSC.PGC.Mitotic.1_larvae
NvNCol-like 4 : NV2.11818	0	0	7	pSC.PGC.Mitotic.1_larvae
NvSpongin-like-1 : NV2.7278	0.000551582	0.111982	7	pSC.PGC.Mitotic.1_larvae
NvSpongin-like-2 : NV2.7899	0.00171315	0.223964	6	pSC.PGC.Mitotic.1_larvae
NvSpongin-like-3 : NV2.8393	0.0692162	7.83875	10	pSC.PGC.Mitotic.1_larvae
NvSpongin-like-4 : NV2.8836	0.000607278	0.111982	7	pSC.PGC.Mitotic.1_larvae
NvLpxACol : NV2.11419	0.053613	5.15118	14	pSC.PGC.Mitotic.1_larvae
NvvWFAGGP : NV2.8259	0	0	7	pSC.PGC.Mitotic.1_larvae
NvvWFA-1 : NV2.856	0.00886157	0.895857	8	pSC.PGC.Mitotic.1_larvae
NvArgn-1 : NV2.14093	0	0	6	pSC.PGC.Mitotic.1_larvae
NvArgn-2 : NV2.13522	0	0	7	pSC.PGC.Mitotic.1_larvae
NvDSLvWFA : NV2.9243	0	0	7	pSC.PGC.Mitotic.1_larvae
NvDMBT-1 : NV2.14958	0.198206	19.5969	7	pSC.PGC.Mitotic.1_larvae
NvDMBT-2 : NV2.24741	0.0123774	1.67973	10	pSC.PGC.Mitotic.1_larvae
NvDSPP : NV2.13059	0.0093499	0.895857	7	pSC.PGC.Mitotic.1_larvae
NvDisc-Ig : NV2.1116	0	0	7	pSC.PGC.Mitotic.1_larvae
NvDisc-SEA : NV2.12171	0.0313174	3.58343	8	pSC.PGC.Mitotic.1_larvae
NvDisc-Sushi-1 : NV2.25722	0	0	7	pSC.PGC.Mitotic.1_larvae
NvDisc-Sushi-2 : NV2.25724	0.0193917	2.23964	10	pSC.PGC.Mitotic.1_larvae
NvDisc : NV2.997	0.00450162	0.335946	8	pSC.PGC.Mitotic.1_larvae
EGF-triLpxA : NV2.12181	0.00329248	0.55991	8	pSC.PGC.Mitotic.1_larvae
NvPolyEGF-PTX-1 : NV2.5962	0.00182575	0.223964	7	pSC.PGC.Mitotic.1_larvae
NvPolyEGF-PTX-2 : NV2.23171	0.00067835	0.111982	7	pSC.PGC.Mitotic.1_larvae
NvPolyEGF-Sushi-Ig : NV2.17270	0.00331622	0.335946	6	pSC.PGC.Mitotic.1_larvae
NvEGF-1 : NV2.10398	0	0	7	pSC.PGC.Mitotic.1_larvae
NvAdhGPCR-E1 : NV2.20524	0.00146272	0.335946	7	pSC.PGC.Mitotic.1_larvae
NvPolyEGF-Disc-1 : NV2.10636	0.00164871	0.335946	7	pSC.PGC.Mitotic.1_larvae
NvPolyEGF-Disc-3 : NV2.13422	0.00175217	0.335946	7	pSC.PGC.Mitotic.1_larvae
NvPolyEGF-Disc-4 : NV2.13802	0.00218834	0.447928	7	pSC.PGC.Mitotic.1_larvae
NvPolyEGF-Disc-8 : NV2.9055	0.0121062	1.79171	8	pSC.PGC.Mitotic.1_larvae
NvPolyEGF-5 : NV2.6022	0.00168495	0.111982	7	pSC.PGC.Mitotic.1_larvae
NvPolyEGF-6 : NV2.24285	0.000327644	0.111982	7	pSC.PGC.Mitotic.1_larvae
NvPolyEGF-7 : NV2.24286	0	0	7	pSC.PGC.Mitotic.1_larvae
NvPolyEGF-8 : NV2.23400	0	0	8	pSC.PGC.Mitotic.1_larvae
NvPolyEGF-9 : NV2.19497	0	0	7	pSC.PGC.Mitotic.1_larvae
NvPolyEGF-10 : NV2.3706	0.00978849	0.783875	7	pSC.PGC.Mitotic.1_larvae
NvPolyEGF-11 : NV2.6897	0.00577333	0.223964	7	pSC.PGC.Mitotic.1_larvae
NvPolyEGF-12 : NV2.7683	0.0110081	1.11982	7	pSC.PGC.Mitotic.1_larvae
NvPolyEGF-13 : NV2.11904	0	0	7	pSC.PGC.Mitotic.1_larvae
NvPolyEGF-14 : NV2.17951	0.00809189	1.00784	8	pSC.PGC.Mitotic.1_larvae
NvPolyEGF-15 : NV2.23650	0	0	7	pSC.PGC.Mitotic.1_larvae
NvPolyEGF-17 : NV2.6034	0	0	7	pSC.PGC.Mitotic.1_larvae
NvPolyEGF-18 : NV2.6437	0	0	7	pSC.PGC.Mitotic.1_larvae
NvPolyEGF-20 : NV2.24543	0.00148321	0.111982	7	pSC.PGC.Mitotic.1_larvae
NvEmilin1 : NV2.10668	0.00148719	0.223964	7	pSC.PGC.Mitotic.1_larvae
NvFbn : NV2.22931	0.00206626	0.223964	8	pSC.PGC.Mitotic.1_larvae
NvFbn-1 : NV2.22930	0.00154033	0.111982	7	pSC.PGC.Mitotic.1_larvae
NvFbn-2 : NV2.22932	0	0	7	pSC.PGC.Mitotic.1_larvae
NvFbn-3 : NV2.14812	0.0161246	1.67973	6	pSC.PGC.Mitotic.1_larvae
NvFib-like : NV2.10397	0	0	7	pSC.PGC.Mitotic.1_larvae
NvFp-like-1 : NV2.3028	0	0	7	pSC.PGC.Mitotic.1_larvae
NvFp-like-10 : NV2.25686	0.0255431	2.91153	9	pSC.PGC.Mitotic.1_larvae
NvFp-like-2 : NV2.6439	0	0	7	pSC.PGC.Mitotic.1_larvae
NvFp-like-3 : NV2.10691	0	0	7	pSC.PGC.Mitotic.1_larvae
NvFp-like-4 : NV2.5916	0.000621459	0.223964	7	pSC.PGC.Mitotic.1_larvae
NvFp-like-5 : NV2.5917	0.00641145	1.11982	7	pSC.PGC.Mitotic.1_larvae
NvFp-like-6 : NV2.5918	0.000904563	0.335946	7	pSC.PGC.Mitotic.1_larvae
NvFp-like-7 : NV2.6438	0.000597556	0.111982	7	pSC.PGC.Mitotic.1_larvae
NvFp-like-8 : NV2.6441	0.0115121	1.67973	7	pSC.PGC.Mitotic.1_larvae
NvFp-like-9 : NV2.13189	0.00215267	0.111982	7	pSC.PGC.Mitotic.1_larvae
NvFbln : NV2.3768	0.0133813	1.56775	6	pSC.PGC.Mitotic.1_larvae
NvHmcn1-like 1 : NV2.23125	0.0247888	3.02352	8	pSC.PGC.Mitotic.1_larvae
NvHncn1 : NV2.24790	0.00437388	0.223964	7	pSC.PGC.Mitotic.1_larvae
NvMFGE-like-1 : NV2.10243	0	0	7	pSC.PGC.Mitotic.1_larvae
NvMFGE-like-2 : NV2.10407	0	0	7	pSC.PGC.Mitotic.1_larvae
NvMFGE-like-3 : NV2.15715	0	0	7	pSC.PGC.Mitotic.1_larvae
NvMFGE-like-4 : NV2.15716	0.00056942	0.111982	7	pSC.PGC.Mitotic.1_larvae
NvMFGE-like-5 : NV2.5960	0	0	7	pSC.PGC.Mitotic.1_larvae
NvLamA1 : NV2.24158	0	0	7	pSC.PGC.Mitotic.1_larvae
NvLamA1-like : NV2.22840	0.0287297	2.68757	7	pSC.PGC.Mitotic.1_larvae
NvLamA5 : NV2.17119	0.00348957	0.447928	7	pSC.PGC.Mitotic.1_larvae
NvLamA-like : NV2.15819	0.00186948	0.223964	7	pSC.PGC.Mitotic.1_larvae
NvLamB1-1 : NV2.1719	0	0	7	pSC.PGC.Mitotic.1_larvae
NvLamB1-2 : NV2.24496	0.118077	12.9899	9	pSC.PGC.Mitotic.1_larvae
NvLamB1-3 : NV2.24823	0.189714	18.3651	16	pSC.PGC.Mitotic.1_larvae
NvLamB2-1 : NV2.25732	0.111776	10.6383	9	pSC.PGC.Mitotic.1_larvae
NvLamB2-2 : NV2.25734	0.00616277	0.671892	9	pSC.PGC.Mitotic.1_larvae
NvLamG : NV2.25737	0.00644241	0.783875	7	pSC.PGC.Mitotic.1_larvae
NvMatn-1 : NV2.836	0.0228498	1.9037	7	pSC.PGC.Mitotic.1_larvae
NvMatn-2 : NV2.840	0	0	7	pSC.PGC.Mitotic.1_larvae
NvMatn-3 : NV2.841	0.00811863	0.671892	9	pSC.PGC.Mitotic.1_larvae
NvMatn-4 : NV2.842	0.00372512	0.447928	7	pSC.PGC.Mitotic.1_larvae
NvMatn-5 : NV2.843	0.0051144	0.671892	7	pSC.PGC.Mitotic.1_larvae
NvMatn-6 : NV2.845	0.00467533	0.55991	7	pSC.PGC.Mitotic.1_larvae
NvMatn-7 : NV2.18428	0	0	7	pSC.PGC.Mitotic.1_larvae
NvMTSP : NV2.14418	0.137086	13.3259	10	pSC.PGC.Mitotic.1_larvae
NvMfap4-1 : NV2.7038	0	0	7	pSC.PGC.Mitotic.1_larvae
NvMfap4-2 : NV2.25470	0	0	7	pSC.PGC.Mitotic.1_larvae
NvMfap4-3 : NV2.16067	0.00713007	1.11982	9	pSC.PGC.Mitotic.1_larvae
NvMfap4-4 : NV2.25464	0	0	7	pSC.PGC.Mitotic.1_larvae
NvMfap4-5 : NV2.5873	0.0481151	6.15901	8	pSC.PGC.Mitotic.1_larvae
NvMfap4-6 : NV2.8818	0	0	7	pSC.PGC.Mitotic.1_larvae
NvMfap4-7 : NV2.17967	0.0258413	2.35162	9	pSC.PGC.Mitotic.1_larvae
NvMfap1 : NV2.13515	0.271862	26.3158	8	pSC.PGC.Mitotic.1_larvae
NvNetr : NV2.7734	0.0607543	7.16685	8	pSC.PGC.Mitotic.1_larvae
NvNid : NV2.20722	0.345489	31.467	17	pSC.PGC.Mitotic.1_larvae
NvNtA : NV2.12221	0.0066456	0.335946	7	pSC.PGC.Mitotic.1_larvae
NvOto-like-1 : NV2.6495	0	0	7	pSC.PGC.Mitotic.1_larvae
NvPtx-1 : NV2.18957	0	0	7	pSC.PGC.Mitotic.1_larvae
NvPtx-2 : NV2.3861	0	0	7	pSC.PGC.Mitotic.1_larvae
NvPtx-related : NV2.23776	0	0	7	pSC.PGC.Mitotic.1_larvae
NvPostn : NV2.20449	0.000427054	0.111982	6	pSC.PGC.Mitotic.1_larvae
NvPxdn : NV2.13306	0	0	7	pSC.PGC.Mitotic.1_larvae
NvPika : NV2.707	0.0516297	6.60694	20	pSC.PGC.Mitotic.1_larvae
NvPolydom-like-1 : NV2.3561	0.00243475	0.111982	7	pSC.PGC.Mitotic.1_larvae
NvPolydom-like-2 : NV2.2755	0.073304	7.95073	7	pSC.PGC.Mitotic.1_larvae
NvPolydom-like-3 : NV2.2824	0.00162316	0.111982	7	pSC.PGC.Mitotic.1_larvae
NvPolydom-like-4 : NV2.13340	0.048073	5.93505	8	pSC.PGC.Mitotic.1_larvae
NvPolydom-related : NV2.11255	0.00414406	0.55991	7	pSC.PGC.Mitotic.1_larvae
NvPolydom1 : NV2.3792	0.00560765	0.671892	7	pSC.PGC.Mitotic.1_larvae
NvPolydom2 : NV2.3300	0	0	7	pSC.PGC.Mitotic.1_larvae
NvPolydom3 : NV2.3560	0.00619256	0.447928	7	pSC.PGC.Mitotic.1_larvae
NvProFnt : NV2.24561	0	0	7	pSC.PGC.Mitotic.1_larvae
NvCFP-1 : NV2.23465	0.0133639	1.2318	6	pSC.PGC.Mitotic.1_larvae
NvCFP-10 : NV2.17239	0.0153991	1.9037	7	pSC.PGC.Mitotic.1_larvae
NvCFP-11 : NV2.17421	0	0	7	pSC.PGC.Mitotic.1_larvae
NvCFP-12 : NV2.19412	0.00207656	0.335946	6	pSC.PGC.Mitotic.1_larvae
NvCFP-13 : NV2.23447	0.199173	16.6853	8	pSC.PGC.Mitotic.1_larvae
NvCFP-14 : NV2.24746	0.0086559	1.2318	7	pSC.PGC.Mitotic.1_larvae
NvCFP-15 : NV2.25346	0	0	6	pSC.PGC.Mitotic.1_larvae
NvCFP-2 : NV2.15937	0.000331976	0.111982	7	pSC.PGC.Mitotic.1_larvae
NvCFP-3 : NV2.10038	0.000760438	0.111982	7	pSC.PGC.Mitotic.1_larvae
NvCFP-4 : NV2.11945	0.00103687	0.111982	7	pSC.PGC.Mitotic.1_larvae
NvCFP-5 : NV2.13338	0.0137166	1.56775	8	pSC.PGC.Mitotic.1_larvae
NvCFP-6 : NV2.13919	0.596037	49.0482	13	pSC.PGC.Mitotic.1_larvae
NvCFP-7 : NV2.13920	0.30635	29.5633	13	pSC.PGC.Mitotic.1_larvae
NvCFP-8 : NV2.15932	0.00198804	0.223964	7	pSC.PGC.Mitotic.1_larvae
NvCFP-9 : NV2.15933	0.000165988	0.111982	7	pSC.PGC.Mitotic.1_larvae
NvCrumbsh-1 : NV2.25658	0.0649303	8.28667	8	pSC.PGC.Mitotic.1_larvae
NvCrumbsh-2 : NV2.25685	0.0630791	5.71109	8	pSC.PGC.Mitotic.1_larvae
NvEys : NV2.6047	0.0864228	9.96641	8	pSC.PGC.Mitotic.1_larvae
NvSAMEGF : NV2.2046	0	0	6	pSC.PGC.Mitotic.1_larvae
NvSCP-TSP-1 : NV2.17517	0.00113139	0.223964	7	pSC.PGC.Mitotic.1_larvae
NvSCP-TSP-2 : NV2.17827	0.00532565	0.447928	7	pSC.PGC.Mitotic.1_larvae
NvSPARC-related : NV2.11433	0.00599134	0.783875	7	pSC.PGC.Mitotic.1_larvae
NvSPARC : NV2.21613	0.00165462	0.223964	6	pSC.PGC.Mitotic.1_larvae
NvCUB-EGF : NV2.18054	0.00301475	0.55991	7	pSC.PGC.Mitotic.1_larvae
NvSlit-like-1 : NV2.7952	0.0116129	1.11982	7	pSC.PGC.Mitotic.1_larvae
NvSlit-like-2 : NV2.12458	0.00771539	1.34378	8	pSC.PGC.Mitotic.1_larvae
NvSlit-like-3 : NV2.20861	0	0	7	pSC.PGC.Mitotic.1_larvae
NvSushi-1 : NV2.25124	0.0143215	1.56775	8	pSC.PGC.Mitotic.1_larvae
NvSushi-2 : NV2.25727	0.00126377	0.223964	7	pSC.PGC.Mitotic.1_larvae
NvSushi-3 : NV2.25725	0.0107922	1.34378	9	pSC.PGC.Mitotic.1_larvae
NvSushi-4 : NV2.24979	0.00319912	0.335946	7	pSC.PGC.Mitotic.1_larvae
NvSushi-6 : NV2.24371	0.131647	15.0056	7	pSC.PGC.Mitotic.1_larvae
NvSushiTSP : NV2.15519	0.0228945	2.91153	7	pSC.PGC.Mitotic.1_larvae
NvTSR : NV2.14919	0	0	7	pSC.PGC.Mitotic.1_larvae
NvTSPd-3 : NV2.17583	0.00222788	0.335946	7	pSC.PGC.Mitotic.1_larvae
NvTSRDisc : NV2.10387	0.00872661	1.00784	7	pSC.PGC.Mitotic.1_larvae
NvTSR-1 : NV2.737	0	0	7	pSC.PGC.Mitotic.1_larvae
NvTSR-2 : NV2.2780	0.00264818	0.223964	7	pSC.PGC.Mitotic.1_larvae
NvTSR-3 : NV2.3202	0.00518692	0.447928	7	pSC.PGC.Mitotic.1_larvae
NvTens : NV2.23274	0.025946	2.68757	8	pSC.PGC.Mitotic.1_larvae
NvTSP-1 : NV2.23884	0.0539356	6.94289	8	pSC.PGC.Mitotic.1_larvae
NvTSP-2 : NV2.23886	0.00316183	0.223964	6	pSC.PGC.Mitotic.1_larvae
NvThyrd : NV2.17626	0.00457806	0.223964	7	pSC.PGC.Mitotic.1_larvae
NvThyr-1 : NV2.14419	0.00111826	0.111982	8	pSC.PGC.Mitotic.1_larvae
NvThyr-2 : NV2.14040	0.00051003	0.111982	7	pSC.PGC.Mitotic.1_larvae
NvThyr-3 : NV2.19319	0.160555	17.8052	6	pSC.PGC.Mitotic.1_larvae
NvTGFbIP-1 : NV2.3437	0.00470872	0.671892	7	pSC.PGC.Mitotic.1_larvae
NvTGFbIP-2 : NV2.2361	0.00654405	1.00784	6	pSC.PGC.Mitotic.1_larvae
NvUsh : NV2.20013	0.00371618	0.335946	7	pSC.PGC.Mitotic.1_larvae
NvUsh-like : NV2.20014	0.0932297	11.3102	12	pSC.PGC.Mitotic.1_larvae
NvvWFA-WAP : NV2.11346	0.0106876	1.45577	7	pSC.PGC.Mitotic.1_larvae
NvLamA2 : NV2.15818	0.0113806	1.79171	7	pSC.PGC.Mitotic.1_larvae
NvvWFAPA : NV2.3759	0.00873925	0.671892	7	pSC.PGC.Mitotic.1_larvae
NvvWFA-WSC : NV2.21576	0.000370115	0.111982	7	pSC.PGC.Mitotic.1_larvae
NvPolyvWFA : NV2.8635	0.00203672	0.223964	7	pSC.PGC.Mitotic.1_larvae
NvvWFA-TSR : NV2.14005	0	0	7	pSC.PGC.Mitotic.1_larvae
NvvWFA-10 : NV2.9760	0	0	7	pSC.PGC.Mitotic.1_larvae
NvvWFA-11 : NV2.9856	0	0	6	pSC.PGC.Mitotic.1_larvae
NvvWFA-12 : NV2.10017	0	0	7	pSC.PGC.Mitotic.1_larvae
NvvWFA-13 : NV2.10983	0	0	7	pSC.PGC.Mitotic.1_larvae
NvvWFA-14 : NV2.11796	0.00378925	0.55991	6	pSC.PGC.Mitotic.1_larvae
NvvWFA-15 : NV2.14073	0	0	7	pSC.PGC.Mitotic.1_larvae
NvvWFA-16 : NV2.14625	0	0	7	pSC.PGC.Mitotic.1_larvae
NvvWFA-17 : NV2.19051	0.225605	24.1881	8	pSC.PGC.Mitotic.1_larvae
NvvWFA-18 : NV2.20167	0.00715124	0.895857	7	pSC.PGC.Mitotic.1_larvae
NvvWFA-19 : NV2.20559	0.0016983	0.335946	7	pSC.PGC.Mitotic.1_larvae
NvvWFA-2 : NV2.10551	0	0	7	pSC.PGC.Mitotic.1_larvae
NvvWFA-20 : NV2.20560	0	0	7	pSC.PGC.Mitotic.1_larvae
NvvWFA-21 : NV2.21578	0	0	7	pSC.PGC.Mitotic.1_larvae
NvvWFA-22 : NV2.24204	0	0	7	pSC.PGC.Mitotic.1_larvae
NvvWFA-23 : NV2.24227	0	0	7	pSC.PGC.Mitotic.1_larvae
NvvWFA-24 : NV2.24228	0.00474099	0.111982	7	pSC.PGC.Mitotic.1_larvae
NvvWFA-3 : NV2.14076	0	0	7	pSC.PGC.Mitotic.1_larvae
NvvWFA-4 : NV2.14087	0	0	7	pSC.PGC.Mitotic.1_larvae
NvvWFA-5 : NV2.1044	0.00147577	0.335946	7	pSC.PGC.Mitotic.1_larvae
NvvWFA-6 : NV2.1047	0.000774748	0.111982	7	pSC.PGC.Mitotic.1_larvae
NvvWFA-7 : NV2.8413	0	0	7	pSC.PGC.Mitotic.1_larvae
NvvWFA-8 : NV2.8558	0.00686163	0.223964	7	pSC.PGC.Mitotic.1_larvae
NvvWFA-9 : NV2.8618	0	0	7	pSC.PGC.Mitotic.1_larvae
NvvWFA-EGF-Disc-1 : NV2.855	0.0981746	8.51064	8	pSC.PGC.Mitotic.1_larvae
NvvWFA-EGF-Disc-2 : NV2.857	0.0108175	1.2318	8	pSC.PGC.Mitotic.1_larvae
NvvWFA-EGF-Disc-3 : NV2.861	0.000633741	0.111982	8	pSC.PGC.Mitotic.1_larvae
NvvWFD-1 : NV2.9287	0.069859	6.94289	7	pSC.PGC.Mitotic.1_larvae
NvvWFD-2 : NV2.21786	0	0	7	pSC.PGC.Mitotic.1_larvae
NvHspg : NV2.14905	0.00297781	0.447928	7	pSC.PGC.Mitotic.1_larvae
NvBcan-like : NV2.12169	0.00083995	0.111982	7	pSC.PGC.Mitotic.1_larvae
NvCspd-like : NV2.11760	0	0	7	pSC.PGC.Mitotic.1_larvae
NvLecc-like-1 : NV2.22624	0.00467378	0.447928	7	pSC.PGC.Mitotic.1_larvae
NvLecc-like-2 : NV2.22626	0	0	7	pSC.PGC.Mitotic.1_larvae
NvPlc : NV2.14907	0.00365373	0.447928	7	pSC.PGC.Mitotic.1_larvae
NvPlc-like : NV2.14904	0.00357997	0.223964	7	pSC.PGC.Mitotic.1_larvae
NvPG-like : NV2.22783	0.0936641	10.3024	8	pSC.PGC.Mitotic.1_larvae
NvVers : NV2.25674	0	0	7	pSC.PGC.Mitotic.1_larvae
NvADAM-1 : NV2.24729	0.668573	49.4961	17	pSC.PGC.Mitotic.1_larvae
NvADAM-2 : NV2.6771	0.15375	16.2374	14	pSC.PGC.Mitotic.1_larvae
NvADAM-3 : NV2.13893	0.364168	34.6025	9	pSC.PGC.Mitotic.1_larvae
NvADAM-4 : NV2.18385	0.0431947	4.92721	7	pSC.PGC.Mitotic.1_larvae
NvADAM-like : NV2.20818	0	0	7	pSC.PGC.Mitotic.1_larvae
NvADAMTS-1 : NV2.22459	0.000635973	0.111982	7	pSC.PGC.Mitotic.1_larvae
NvADAMTS-10 : NV2.21229	0.00151871	0.223964	7	pSC.PGC.Mitotic.1_larvae
NvADAMTS-11 : NV2.21230	0.0303968	1.45577	7	pSC.PGC.Mitotic.1_larvae
NvADAMTS-12 : NV2.21636	0	0	7	pSC.PGC.Mitotic.1_larvae
NvADAMTS-13 : NV2.21638	0.00382553	0.55991	7	pSC.PGC.Mitotic.1_larvae
NvADAMTS-14 : NV2.22465	0.000218093	0.111982	7	pSC.PGC.Mitotic.1_larvae
NvADAMTS-15 : NV2.25184	0.00132245	0.223964	7	pSC.PGC.Mitotic.1_larvae
NvADAMTS-2 : NV2.17494	0	0	7	pSC.PGC.Mitotic.1_larvae
NvADAMTS-3 : NV2.24253	0.00137664	0.335946	7	pSC.PGC.Mitotic.1_larvae
NvADAMTS-4 : NV2.9914	0.00932711	1.11982	7	pSC.PGC.Mitotic.1_larvae
NvADAMTS-5 : NV2.1123	0.0825578	9.85442	9	pSC.PGC.Mitotic.1_larvae
NvADAMTS-6 : NV2.1120	0.0556136	5.93505	7	pSC.PGC.Mitotic.1_larvae
NvADAMTS-7 : NV2.88	0.000916384	0.111982	7	pSC.PGC.Mitotic.1_larvae
NvADAMTS-8 : NV2.1124	0.0165598	2.23964	7	pSC.PGC.Mitotic.1_larvae
NvADAMTS-9 : NV2.17536	0	0	7	pSC.PGC.Mitotic.1_larvae
NvADAMTS13-related : NV2.18541	0	0	7	pSC.PGC.Mitotic.1_larvae
NvADAMTS-17 : NV2.23275	0.00113664	0.111982	7	pSC.PGC.Mitotic.1_larvae
NvADAMTS-18 : NV2.20821	0.00125589	0.223964	6	pSC.PGC.Mitotic.1_larvae
NvADAMTS-19 : NV2.87	0.00615795	0.783875	7	pSC.PGC.Mitotic.1_larvae
NvADAMTS-20 : NV2.22999	0.109457	12.542	8	pSC.PGC.Mitotic.1_larvae
NvADAMTS-21 : NV2.24070	0.00908287	0.783875	7	pSC.PGC.Mitotic.1_larvae
NvNaglu : NV2.4033	0.00827883	1.00784	8	pSC.PGC.Mitotic.1_larvae
NvAstacin-10 : NV2.23064	0.0254542	3.47144	8	pSC.PGC.Mitotic.1_larvae
NvAstacin-11 : NV2.4041	0.0334015	3.1355	8	pSC.PGC.Mitotic.1_larvae
NvAstacin-12 : NV2.21687	0	0	7	pSC.PGC.Mitotic.1_larvae
NvAstacin-13 : NV2.18310	0.00515341	0.55991	7	pSC.PGC.Mitotic.1_larvae
NvAstacin-14 : NV2.18077	0.00242698	0.335946	7	pSC.PGC.Mitotic.1_larvae
NvAstacin-15 : NV2.3279	0.0107	1.34378	7	pSC.PGC.Mitotic.1_larvae
NvAstacin-16 : NV2.3953	0.00577027	1.00784	7	pSC.PGC.Mitotic.1_larvae
NvAstacin-17 : NV2.5152	0.00501949	0.447928	7	pSC.PGC.Mitotic.1_larvae
NvAstacin-18 : NV2.8552	0.0419319	3.47144	8	pSC.PGC.Mitotic.1_larvae
NvAstacin-19 : NV2.10155	0.00278818	0.223964	7	pSC.PGC.Mitotic.1_larvae
NvAstacin-1 : NV2.16729	0.00936254	0.335946	7	pSC.PGC.Mitotic.1_larvae
NvAstacin-2 : NV2.24546	2.90902	80.2912	20	pSC.PGC.Mitotic.1_larvae
NvAstacin-20 : NV2.11168	0.00267086	0.335946	7	pSC.PGC.Mitotic.1_larvae
NvAstacin-21 : NV2.11169	0.00446385	0.335946	7	pSC.PGC.Mitotic.1_larvae
NvAstacin-22 : NV2.11270	0.00303356	0.335946	7	pSC.PGC.Mitotic.1_larvae
NvAstacin-23 : NV2.13964	0.00242139	0.223964	7	pSC.PGC.Mitotic.1_larvae
NvAstacin-24 : NV2.14830	0.00698037	0.895857	8	pSC.PGC.Mitotic.1_larvae
NvAstacin-25 : NV2.15018	0.00155781	0.223964	7	pSC.PGC.Mitotic.1_larvae
NvAstacin-26 : NV2.17332	0	0	7	pSC.PGC.Mitotic.1_larvae
NvAstacin-27 : NV2.17973	0.00198867	0.111982	7	pSC.PGC.Mitotic.1_larvae
NvAstacin-28 : NV2.18104	0.00888583	1.00784	7	pSC.PGC.Mitotic.1_larvae
NvAstacin-29 : NV2.21385	0.00219548	0.223964	7	pSC.PGC.Mitotic.1_larvae
NvAstacin-3 : NV2.10250	0.00275606	0.447928	7	pSC.PGC.Mitotic.1_larvae
NvAstacin-4 : NV2.13745	0	0	7	pSC.PGC.Mitotic.1_larvae
NvAstacin-5 : NV2.2486	0	0	7	pSC.PGC.Mitotic.1_larvae
NvAstacin-6 : NV2.15011	0.000703847	0.111982	7	pSC.PGC.Mitotic.1_larvae
NvAstacin-7 : NV2.19110	0.00172001	0.335946	7	pSC.PGC.Mitotic.1_larvae
NvAstacin-8 : NV2.5141	0.00136922	0.335946	7	pSC.PGC.Mitotic.1_larvae
NvAstacin-9 : NV2.2433	0.0194715	1.67973	6	pSC.PGC.Mitotic.1_larvae
NvAstacin-like-1 : NV2.14828	0.00091072	0.111982	6	pSC.PGC.Mitotic.1_larvae
NvAstacin-like-2 : NV2.8027	0.00564758	0.55991	7	pSC.PGC.Mitotic.1_larvae
NvBMP/Toll-1 : NV2.25693	0.189453	20.3807	14	pSC.PGC.Mitotic.1_larvae
NvBMP/Toll-2 : NV2.25692	0.0677035	8.06271	10	pSC.PGC.Mitotic.1_larvae
NvCoag-like 1 : NV2.19953	0	0	7	pSC.PGC.Mitotic.1_larvae
NvCoag-like 2 : NV2.1113	0	0	7	pSC.PGC.Mitotic.1_larvae
NvCoag-like 3 : NV2.19396	0	0	7	pSC.PGC.Mitotic.1_larvae
NvCoag-like 4 : NV2.1635	0	0	7	pSC.PGC.Mitotic.1_larvae
NvCoag-like 5 : NV2.3648	0	0	7	pSC.PGC.Mitotic.1_larvae
NvCoag-like 6 : NV2.19400	0	0	7	pSC.PGC.Mitotic.1_larvae
NvCoag-related 1 : NV2.14492	0.00329863	0.335946	8	pSC.PGC.Mitotic.1_larvae
NvCoag-related 2 : NV2.581	0.0033872	0.447928	7	pSC.PGC.Mitotic.1_larvae
NvCoag-related 3 : NV2.593	0	0	7	pSC.PGC.Mitotic.1_larvae
NvCoag-related 4 : NV2.1284	0	0	7	pSC.PGC.Mitotic.1_larvae
NvCystat-1 : NV2.8996	0.70297	41.7693	8	pSC.PGC.Mitotic.1_larvae
NvCystat-2 : NV2.12344	0.248339	25.084	6	pSC.PGC.Mitotic.1_larvae
NvCystat-3 : NV2.17628	1.14503	70.4367	7	pSC.PGC.Mitotic.1_larvae
NvCRELD2 : NV2.1170	0.119668	13.9978	5	pSC.PGC.Mitotic.1_larvae
NvHspe-1 : NV2.17717	0.0618083	7.83875	11	pSC.PGC.Mitotic.1_larvae
NvHspe-2 : NV2.18651	0.00410773	0.671892	7	pSC.PGC.Mitotic.1_larvae
NvHyal-1 : NV2.14428	0.00107003	0.223964	6	pSC.PGC.Mitotic.1_larvae
NvHyal-2 : NV2.14444	0.0976112	11.8701	15	pSC.PGC.Mitotic.1_larvae
NvIGFKz : NV2.6476	0	0	6	pSC.PGC.Mitotic.1_larvae
NvItih : NV2.22463	0.107175	10.8623	6	pSC.PGC.Mitotic.1_larvae
NvItih-hC : NV2.15230	0.00213951	0.111982	6	pSC.PGC.Mitotic.1_larvae
NvKSI : NV2.14070	0	0	7	pSC.PGC.Mitotic.1_larvae
NvKusi-1 : NV2.10172	0.028791	3.24748	6	pSC.PGC.Mitotic.1_larvae
NvKusi-2 : NV2.320	0.00312891	0.335946	6	pSC.PGC.Mitotic.1_larvae
NvKusi-3 : NV2.3373	0.361841	29.7872	6	pSC.PGC.Mitotic.1_larvae
NvKusi-4 : NV2.21204	0.0120062	1.56775	7	pSC.PGC.Mitotic.1_larvae
NvLDTFM : NV2.20815	0.00120463	0.111982	6	pSC.PGC.Mitotic.1_larvae
NvLox : NV2.19165	0.000681488	0.111982	7	pSC.PGC.Mitotic.1_larvae
NvLox2-like : NV2.19166	0.00114314	0.111982	6	pSC.PGC.Mitotic.1_larvae
NvM28MMP : NV2.13120	0.50478	42.8891	14	pSC.PGC.Mitotic.1_larvae
NvMASP : NV2.3735	0.00131404	0.111982	6	pSC.PGC.Mitotic.1_larvae
NvMMP-2 : NV2.20474	0.0351788	2.12766	6	pSC.PGC.Mitotic.1_larvae
NvMMP-3 : NV2.807	0	0	7	pSC.PGC.Mitotic.1_larvae
NvMMP-4 : NV2.10833	0	0	7	pSC.PGC.Mitotic.1_larvae
NvMMP-5 : NV2.14297	0.000919544	0.111982	7	pSC.PGC.Mitotic.1_larvae
NvMMP-6 : NV2.1647	0	0	7	pSC.PGC.Mitotic.1_larvae
NvMMP-7 : NV2.3582	0	0	8	pSC.PGC.Mitotic.1_larvae
NvMMP-8 : NV2.14820	0.00298152	0.447928	8	pSC.PGC.Mitotic.1_larvae
NvMMP-9 : NV2.16880	0	0	6	pSC.PGC.Mitotic.1_larvae
NvMMP-1 : NV2.8375	0.00704441	0.783875	7	pSC.PGC.Mitotic.1_larvae
NvMMP-10 : NV2.19146	0.00213441	0.335946	7	pSC.PGC.Mitotic.1_larvae
NvMMP-11 : NV2.19316	0.0139063	1.67973	7	pSC.PGC.Mitotic.1_larvae
NvMMP-12 : NV2.20475	0.261197	9.74244	5	pSC.PGC.Mitotic.1_larvae
NvMep-1 : NV2.25961	0.0182598	1.79171	8	pSC.PGC.Mitotic.1_larvae
NvMep-10 : NV2.5698	0.178201	16.5733	11	pSC.PGC.Mitotic.1_larvae
NvMep-11 : NV2.8948	0.000234233	0.111982	7	pSC.PGC.Mitotic.1_larvae
NvMep-12 : NV2.13368	0.00508255	0.671892	7	pSC.PGC.Mitotic.1_larvae
NvMep-13 : NV2.14862	0	0	7	pSC.PGC.Mitotic.1_larvae
NvMep-14 : NV2.15924	0	0	7	pSC.PGC.Mitotic.1_larvae
NvMep-15 : NV2.15925	0.00141364	0.223964	7	pSC.PGC.Mitotic.1_larvae
NvMep-16 : NV2.16035	0.000708478	0.111982	7	pSC.PGC.Mitotic.1_larvae
NvMep-17 : NV2.16036	0	0	7	pSC.PGC.Mitotic.1_larvae
NvMep-18 : NV2.23644	0.000524408	0.111982	7	pSC.PGC.Mitotic.1_larvae
NvMep-2 : NV2.16572	0.00637929	0.671892	7	pSC.PGC.Mitotic.1_larvae
NvMep-3 : NV2.20641	0.0250542	2.57559	8	pSC.PGC.Mitotic.1_larvae
NvMep-4 : NV2.16574	0	0	8	pSC.PGC.Mitotic.1_larvae
NvMep-5 : NV2.17022	0	0	7	pSC.PGC.Mitotic.1_larvae
NvMep-6 : NV2.16080	0	0	7	pSC.PGC.Mitotic.1_larvae
NvMep-7 : NV2.16077	0.00151916	0.223964	7	pSC.PGC.Mitotic.1_larvae
NvMep-8 : NV2.17021	0.00807552	1.00784	7	pSC.PGC.Mitotic.1_larvae
NvMep-9 : NV2.6019	0.00602237	1.11982	7	pSC.PGC.Mitotic.1_larvae
NvPappa : NV2.25632	0	0	7	pSC.PGC.Mitotic.1_larvae
NvPLG : NV2.7036	0.00067007	0.111982	7	pSC.PGC.Mitotic.1_larvae
NvGGGtfK : NV2.9869	0.0270289	3.02352	20	pSC.PGC.Mitotic.1_larvae
NvSerpin-1 : NV2.3266	0.00670601	0.783875	6	pSC.PGC.Mitotic.1_larvae
NvSerpin-2 : NV2.21103	0.157948	19.4849	6	pSC.PGC.Mitotic.1_larvae
NvSVMP-like-1 : NV2.14357	0.000988717	0.111982	6	pSC.PGC.Mitotic.1_larvae
NvSVMP-like-2 : NV2.14356	0	0	6	pSC.PGC.Mitotic.1_larvae
NvTIMP-1 : NV2.3671	0.000642173	0.111982	7	pSC.PGC.Mitotic.1_larvae
NvTIMP-2 : NV2.3669	0	0	7	pSC.PGC.Mitotic.1_larvae
NvTIMP-3 : NV2.17964	0.0320467	1.67973	6	pSC.PGC.Mitotic.1_larvae
NvTIMP-4 : NV2.2779	0	0	7	pSC.PGC.Mitotic.1_larvae
NvToll : NV2.3100	0.00348948	0.55991	6	pSC.PGC.Mitotic.1_larvae
NvToll-like : NV2.21954	0	0	6	pSC.PGC.Mitotic.1_larvae
NvTryI-like : NV2.3632	0.00266399	0.55991	6	pSC.PGC.Mitotic.1_larvae
NvTyr : NV2.12418	0	0	7	pSC.PGC.Mitotic.1_larvae
NvvWFAIg : NV2.21577	0	0	7	pSC.PGC.Mitotic.1_larvae
NvvWFAKz-1 : NV2.14043	0	0	6	pSC.PGC.Mitotic.1_larvae
NvnWFAGonKz : NV2.14092	0	0	7	pSC.PGC.Mitotic.1_larvae
NvAnnexin-1 : NV2.19402	0.0235148	2.35162	6	pSC.PGC.Mitotic.1_larvae
NvAnnexin-2 : NV2.9562	0.400382	36.5062	10	pSC.PGC.Mitotic.1_larvae
NvAnnexin-3 : NV2.10289	0.141505	15.5655	9	pSC.PGC.Mitotic.1_larvae
NvAnnexin-4 : NV2.19403	0.00462907	0.335946	7	pSC.PGC.Mitotic.1_larvae
NvAnnexin-5 : NV2.19404	0.00859931	1.00784	7	pSC.PGC.Mitotic.1_larvae
NvAnos1 : NV2.6365	0.0895377	10.4143	10	pSC.PGC.Mitotic.1_larvae
NvCreact : NV2.11374	0	0	7	pSC.PGC.Mitotic.1_larvae
NvCTLDvWFA-1 : NV2.20956	0	0	7	pSC.PGC.Mitotic.1_larvae
NvCTLDvWFA-2 : NV2.20522	0.000622123	0.111982	7	pSC.PGC.Mitotic.1_larvae
NvCTLDvWFA-3 : NV2.20957	0	0	7	pSC.PGC.Mitotic.1_larvae
NvCTLD-1 : NV2.7430	0	0	7	pSC.PGC.Mitotic.1_larvae
NvCTLD-2 : NV2.18171	0	0	7	pSC.PGC.Mitotic.1_larvae
NvCTLD-3 : NV2.1101	0	0	7	pSC.PGC.Mitotic.1_larvae
NvCTLD-4 : NV2.5627	0	0	7	pSC.PGC.Mitotic.1_larvae
NvCTLD-5 : NV2.5851	0	0	7	pSC.PGC.Mitotic.1_larvae
NvCTLD-6 : NV2.8276	0.00124591	0.111982	7	pSC.PGC.Mitotic.1_larvae
NvCTLD-7 : NV2.8278	0.0962074	11.8701	9	pSC.PGC.Mitotic.1_larvae
NvCTLD-8 : NV2.18585	0.00280784	0.55991	7	pSC.PGC.Mitotic.1_larvae
NvCUB-Ig : NV2.10732	0.00266984	0.55991	5	pSC.PGC.Mitotic.1_larvae
NvCUB-TSP : NV2.3253	0.10158	6.60694	8	pSC.PGC.Mitotic.1_larvae
NvCUB-ZP-1 : NV2.21283	0.68626	53.0795	20	pSC.PGC.Mitotic.1_larvae
NvCUB-ZP-2 : NV2.21285	0.000595713	0.111982	7	pSC.PGC.Mitotic.1_larvae
NvCUB-misc-1 : NV2.17853	0	0	7	pSC.PGC.Mitotic.1_larvae
NvCUB-misc-5 : NV2.3067	0.69141	53.0795	10	pSC.PGC.Mitotic.1_larvae
NvNgalectin-like : NV2.4511	0.0115392	1.56775	7	pSC.PGC.Mitotic.1_larvae
NvNgalectin-2 : NV2.5188	0.0020581	0.335946	7	pSC.PGC.Mitotic.1_larvae
NvNgalectin-3 : NV2.5196	0	0	7	pSC.PGC.Mitotic.1_larvae
NvNgalectin-1 : NV2.5200	0.0808832	8.28667	7	pSC.PGC.Mitotic.1_larvae
NvCollectin : NV2.23165	0.000962542	0.111982	7	pSC.PGC.Mitotic.1_larvae
NvComplC : NV2.11502	0.00121734	0.223964	7	pSC.PGC.Mitotic.1_larvae
NvNADPH1-1 : NV2.27	0.00328084	0.335946	7	pSC.PGC.Mitotic.1_larvae
NvNADPH1-2 : NV2.21	0.265372	25.4199	13	pSC.PGC.Mitotic.1_larvae
NvFras : NV2.19212	0.00303557	0.111982	7	pSC.PGC.Mitotic.1_larvae
NvHLecAg : NV2.5939	0	0	7	pSC.PGC.Mitotic.1_larvae
NvIntL-like-1 : NV2.7079	0.0072203	0.55991	7	pSC.PGC.Mitotic.1_larvae
NvIntL-like-2 : NV2.22909	0.000754901	0.111982	7	pSC.PGC.Mitotic.1_larvae
NvMAMCTLD-1 : NV2.23818	0	0	7	pSC.PGC.Mitotic.1_larvae
NvMAMCTLD-2 : NV2.23715	0.00553085	0.55991	8	pSC.PGC.Mitotic.1_larvae
NvManR : NV2.19044	0	0	7	pSC.PGC.Mitotic.1_larvae
NvMuc4-1 : NV2.16270	0.0803453	8.62262	9	pSC.PGC.Mitotic.1_larvae
NvMuc4-2 : NV2.16273	0.585534	41.7693	15	pSC.PGC.Mitotic.1_larvae
NvMuc-like-1 : NV2.12620	0.0041769	0.671892	8	pSC.PGC.Mitotic.1_larvae
NvMuc-like-10 : NV2.17784	0	0	7	pSC.PGC.Mitotic.1_larvae
NvMuc-like-11 : NV2.19027	0.000696753	0.111982	7	pSC.PGC.Mitotic.1_larvae
NvMuc-like-2 : NV2.24863	0.00228879	0.223964	7	pSC.PGC.Mitotic.1_larvae
NvMuc-like-3 : NV2.1129	0.00318066	0.55991	7	pSC.PGC.Mitotic.1_larvae
NvMuc-like-4 : NV2.2216	0.00137075	0.223964	7	pSC.PGC.Mitotic.1_larvae
NvMuc-like-5 : NV2.6919	0.0176646	1.67973	8	pSC.PGC.Mitotic.1_larvae
NvMuc-like-6 : NV2.12174	0.0277988	3.47144	7	pSC.PGC.Mitotic.1_larvae
NvMuc-like-7 : NV2.12741	0	0	7	pSC.PGC.Mitotic.1_larvae
NvMuc-like-8 : NV2.12902	0.00622177	0.671892	7	pSC.PGC.Mitotic.1_larvae
NvMuc-like-9 : NV2.16210	0	0	7	pSC.PGC.Mitotic.1_larvae
NvNOWA-1 : NV2.15872	0.00309378	0.55991	7	pSC.PGC.Mitotic.1_larvae
NvNOWA-2 : NV2.10392	0	0	7	pSC.PGC.Mitotic.1_larvae
NvNOWA-3 : NV2.10388	0.0237643	2.91153	7	pSC.PGC.Mitotic.1_larvae
NvNOWA-4 : NV2.10390	0.000608731	0.111982	7	pSC.PGC.Mitotic.1_larvae
NvNOWA-related : NV2.10391	0	0	7	pSC.PGC.Mitotic.1_larvae
NvNat-like : NV2.5928	0.00158746	0.223964	7	pSC.PGC.Mitotic.1_larvae
NvPAN-App-EGF-1 : NV2.5576	0.00138232	0.111982	7	pSC.PGC.Mitotic.1_larvae
NvPAN-App-EGF-2 : NV2.20124	0.00072042	0.111982	7	pSC.PGC.Mitotic.1_larvae
NvPALec-1 : NV2.18114	0.00210177	0.111982	7	pSC.PGC.Mitotic.1_larvae
NvMesh : NV2.16433	0.000790164	0.111982	7	pSC.PGC.Mitotic.1_larvae
NvSEA-WSC-1 : NV2.13381	0.00501687	0.783875	7	pSC.PGC.Mitotic.1_larvae
NvSEA-WSC-2 : NV2.15283	0.0107475	1.34378	7	pSC.PGC.Mitotic.1_larvae
NvSEAR : NV2.14509	0.00324116	0.111982	7	pSC.PGC.Mitotic.1_larvae
NvSel-related-1 : NV2.3407	0.00146038	0.111982	7	pSC.PGC.Mitotic.1_larvae
NvSel-related-2 : NV2.17145	0	0	7	pSC.PGC.Mitotic.1_larvae
NvSEMA5B : NV2.11758	0.086858	10.7503	9	pSC.PGC.Mitotic.1_larvae
NvSEMA-like-1 : NV2.7220	0	0	6	pSC.PGC.Mitotic.1_larvae
NvSEMA-like-2 : NV2.22863	0.066127	7.72676	7	pSC.PGC.Mitotic.1_larvae
NvSnaclec-like-2 : NV2.22444	0.00871265	0.895857	7	pSC.PGC.Mitotic.1_larvae
NvSnaclec-like-3 : NV2.13847	0.000715449	0.111982	7	pSC.PGC.Mitotic.1_larvae
NvSnaclec-like-4 : NV2.14543	0.00310896	0.223964	7	pSC.PGC.Mitotic.1_larvae
NvSynd : NV2.6659	1.67089	79.1713	6	pSC.PGC.Mitotic.1_larvae
NvvWFAConA-1 : NV2.16335	0.00225117	0.447928	7	pSC.PGC.Mitotic.1_larvae
NvvWFAConA-2 : NV2.16336	0.00221795	0.223964	7	pSC.PGC.Mitotic.1_larvae
NvvWFAConA-3 : NV2.16343	0.0189615	1.56775	9	pSC.PGC.Mitotic.1_larvae
NvvWFAConA-4 : NV2.16338	0.0442945	4.81523	9	pSC.PGC.Mitotic.1_larvae
NvAdmp-1 : NV2.2978	0.0804726	9.40649	8	pSC.PGC.Mitotic.1_larvae
NvBMP2 : NV2.19847	0.0332209	2.91153	8	pSC.PGC.Mitotic.1_larvae
NvBMP7 : NV2.6269	0.112958	11.1982	8	pSC.PGC.Mitotic.1_larvae
NvCUB-misc-2 : NV2.14699	0.0165462	2.01568	7	pSC.PGC.Mitotic.1_larvae
NvCUB-misc-3 : NV2.3898	0.0569133	6.71892	8	pSC.PGC.Mitotic.1_larvae
NvCUB-misc-4 : NV2.2661	0.244853	26.2038	15	pSC.PGC.Mitotic.1_larvae
NvChrd : NV2.14185	0.490336	13.4378	20	pSC.PGC.Mitotic.1_larvae
NvChrd-like : NV2.22735	0.000692958	0.111982	7	pSC.PGC.Mitotic.1_larvae
NvDllR-1 : NV2.5910	0.00331298	0.447928	7	pSC.PGC.Mitotic.1_larvae
NvDllR-2 : NV2.22236	0.157545	16.9093	9	pSC.PGC.Mitotic.1_larvae
NvDll-like 1 : NV2.20618	0.234996	22.7324	13	pSC.PGC.Mitotic.1_larvae
NvDll-like 2 : NV2.20616	0.341128	31.355	9	pSC.PGC.Mitotic.1_larvae
NvDhhA : NV2.128	0.00460935	0.671892	7	pSC.PGC.Mitotic.1_larvae
NvEGF-Ig : NV2.16522	0	0	7	pSC.PGC.Mitotic.1_larvae
NvPolyEGF-1 : NV2.14162	0	0	7	pSC.PGC.Mitotic.1_larvae
NvPolyEGF-2 : NV2.25193	0	0	7	pSC.PGC.Mitotic.1_larvae
NvEda-like-1 : NV2.22707	0.221885	23.0683	14	pSC.PGC.Mitotic.1_larvae
NvEda-like-2 : NV2.22131	0.00152939	0.111982	7	pSC.PGC.Mitotic.1_larvae
NvEda-like-3 : NV2.22054	0.143739	17.2452	8	pSC.PGC.Mitotic.1_larvae
NvEda-like-4 : NV2.22056	0.0700425	7.61478	19	pSC.PGC.Mitotic.1_larvae
NvEda-like-5 : NV2.22058	0.000657712	0.111982	7	pSC.PGC.Mitotic.1_larvae
NvEGF-like : NV2.25171	0.0436838	5.71109	7	pSC.PGC.Mitotic.1_larvae
NvFREP-1 : NV2.1244	0	0	7	pSC.PGC.Mitotic.1_larvae
NvFREP-10 : NV2.19426	0	0	8	pSC.PGC.Mitotic.1_larvae
NvFREP-11 : NV2.22115	0.00305555	0.335946	7	pSC.PGC.Mitotic.1_larvae
NvFREP-12 : NV2.24719	0	0	7	pSC.PGC.Mitotic.1_larvae
NvFREP-13 : NV2.7282	0.00472	0.335946	7	pSC.PGC.Mitotic.1_larvae
NvFREP-14 : NV2.25466	0	0	7	pSC.PGC.Mitotic.1_larvae
NvFREP-15 : NV2.22910	0	0	7	pSC.PGC.Mitotic.1_larvae
NvFREP-16 : NV2.566	0.00083995	0.111982	7	pSC.PGC.Mitotic.1_larvae
NvFREP-17 : NV2.2132	0.00109894	0.111982	7	pSC.PGC.Mitotic.1_larvae
NvFREP-18 : NV2.2698	0.025036	2.35162	8	pSC.PGC.Mitotic.1_larvae
NvFREP-19 : NV2.4753	0.00156525	0.223964	7	pSC.PGC.Mitotic.1_larvae
NvFREP-2 : NV2.1985	0	0	7	pSC.PGC.Mitotic.1_larvae
NvFREP-20 : NV2.5688	0.00088776	0.111982	7	pSC.PGC.Mitotic.1_larvae
NvFREP-21 : NV2.6010	0	0	7	pSC.PGC.Mitotic.1_larvae
NvFREP-22 : NV2.7679	0.00311789	0.223964	7	pSC.PGC.Mitotic.1_larvae
NvFREP-23 : NV2.9815	0	0	7	pSC.PGC.Mitotic.1_larvae
NvFREP-24 : NV2.11287	0	0	7	pSC.PGC.Mitotic.1_larvae
NvFREP-25 : NV2.12036	0.00145356	0.111982	7	pSC.PGC.Mitotic.1_larvae
NvFREP-26 : NV2.13457	0	0	7	pSC.PGC.Mitotic.1_larvae
NvFREP-27 : NV2.22610	0.0061223	0.895857	7	pSC.PGC.Mitotic.1_larvae
NvFREP-28 : NV2.25688	0	0	7	pSC.PGC.Mitotic.1_larvae
NvFREP-29 : NV2.11749	0	0	7	pSC.PGC.Mitotic.1_larvae
NvFREP-3 : NV2.6245	0.004281	0.335946	7	pSC.PGC.Mitotic.1_larvae
NvFREPd-4 : NV2.24006	0	0	7	pSC.PGC.Mitotic.1_larvae
NvFREP-5 : NV2.17198	0	0	7	pSC.PGC.Mitotic.1_larvae
NvFREP-6 : NV2.24867	0	0	7	pSC.PGC.Mitotic.1_larvae
NvFREP-7 : NV2.14110	0.000760025	0.111982	6	pSC.PGC.Mitotic.1_larvae
NvFREP-8 : NV2.24484	0.0826101	9.96641	12	pSC.PGC.Mitotic.1_larvae
NvFREP-9 : NV2.10046	0.000733251	0.111982	7	pSC.PGC.Mitotic.1_larvae
NvFst : NV2.23832	0.010851	1.11982	7	pSC.PGC.Mitotic.1_larvae
NvFst-like 1 : NV2.13423	0.0261023	2.68757	6	pSC.PGC.Mitotic.1_larvae
NvFst-like 2 : NV2.23229	0.0184908	2.35162	6	pSC.PGC.Mitotic.1_larvae
NvFst-like 3 : NV2.23230	0.165693	14.2217	6	pSC.PGC.Mitotic.1_larvae
NvGDF : NV2.6489	0.107094	10.6383	8	pSC.PGC.Mitotic.1_larvae
NvHH1 : NV2.10760	0.00361757	0.671892	6	pSC.PGC.Mitotic.1_larvae
NvIhh : NV2.23188	0.0399813	4.70325	7	pSC.PGC.Mitotic.1_larvae
NvInbb : NV2.173	0.00138312	0.223964	7	pSC.PGC.Mitotic.1_larvae
NvJag : NV2.19817	0.032453	3.24748	7	pSC.PGC.Mitotic.1_larvae
NvKcp-like-1 : NV2.3424	0.000456548	0.111982	7	pSC.PGC.Mitotic.1_larvae
NvKcp-like-2 : NV2.12484	0.00162058	0.111982	7	pSC.PGC.Mitotic.1_larvae
NvKcp-like-3 : NV2.12730	0.0414729	4.70325	10	pSC.PGC.Mitotic.1_larvae
NvLTBP : NV2.20944	0.000510448	0.111982	8	pSC.PGC.Mitotic.1_larvae
NvPolyEGF-3 : NV2.13872	0.00192873	0.111982	6	pSC.PGC.Mitotic.1_larvae
NvPolyEGF-4 : NV2.14163	0.012584	1.11982	7	pSC.PGC.Mitotic.1_larvae
NvPolyEGF-21 : NV2.21926	0.0722497	8.28667	8	pSC.PGC.Mitotic.1_larvae
NvPALec-2 : NV2.21307	0.000642541	0.111982	7	pSC.PGC.Mitotic.1_larvae
NvPALec-3 : NV2.21375	0	0	7	pSC.PGC.Mitotic.1_larvae
NvPAN-1 : NV2.6411	0	0	7	pSC.PGC.Mitotic.1_larvae
NvPAN-2 : NV2.7825	0.000792962	0.111982	7	pSC.PGC.Mitotic.1_larvae
NvPAN-3 : NV2.8000	0	0	7	pSC.PGC.Mitotic.1_larvae
NvSFRP : NV2.14654	0.0645356	5.48712	7	pSC.PGC.Mitotic.1_larvae
NvSOM-TSP : NV2.16600	0.054074	5.15118	7	pSC.PGC.Mitotic.1_larvae
NvTNF : NV2.22057	0.00464292	0.447928	6	pSC.PGC.Mitotic.1_larvae
NvVEGF : NV2.2923	0.141231	15.5655	11	pSC.PGC.Mitotic.1_larvae
NvVgt-1 : NV2.914	0.00217055	0.223964	6	pSC.PGC.Mitotic.1_larvae
NvVgt-2 : NV2.1922	0.00147144	0.223964	7	pSC.PGC.Mitotic.1_larvae
NvVgt-like : NV2.74	0.000599964	0.223964	6	pSC.PGC.Mitotic.1_larvae
NvWnt1 : NV2.12225	0.00179695	0.223964	7	pSC.PGC.Mitotic.1_larvae
NvWnt10a : NV2.11032	0	0	7	pSC.PGC.Mitotic.1_larvae
NvWnt11 : NV2.22664	0.0635034	8.06271	8	pSC.PGC.Mitotic.1_larvae
NvWnt16 : NV2.2707	0.000728671	0.111982	6	pSC.PGC.Mitotic.1_larvae
NvWnt2b : NV2.3168	1.4364	54.9832	20	pSC.PGC.Mitotic.1_larvae
NvWnt3a : NV2.12463	0.00180838	0.335946	7	pSC.PGC.Mitotic.1_larvae
NvWint5a : NV2.3611	0.0620483	8.17469	8	pSC.PGC.Mitotic.1_larvae
NvWnt6 : NV2.11033	0.0854015	10.1904	17	pSC.PGC.Mitotic.1_larvae
NvWnt7b-3 : NV2.23407	0.0245894	3.1355	8	pSC.PGC.Mitotic.1_larvae
NvWnt7b-1 : NV2.3609	0.0101402	0.783875	7	pSC.PGC.Mitotic.1_larvae
NvWnt8a : NV2.4522	0.0043716	0.783875	7	pSC.PGC.Mitotic.1_larvae
NvWnt8a-like : NV2.3689	0.0149325	1.34378	7	pSC.PGC.Mitotic.1_larvae
NvWnt8b-2 : NV2.5661	0.00339058	0.447928	7	pSC.PGC.Mitotic.1_larvae
NvvWFC : NV2.12328	0	0	7	pSC.PGC.Mitotic.1_larvae
NvGTF2 : NV2.14946	0.0135512	1.67973	10	pSC.PGC.Mitotic.1_larvae
NvPFnt : NV2.24348	0.00299097	0.111982	7	pSC.PGC.Mitotic.1_larvae
NvPtprq-1 : NV2.600	0.00623051	0.335946	7	pSC.PGC.Mitotic.1_larvae
NvPtprq-2 : NV2.599	0.00109422	0.111982	7	pSC.PGC.Mitotic.1_larvae
NvPtprq-3 : NV2.12753	0	0	7	pSC.PGC.Mitotic.1_larvae
NvPtprq-4 : NV2.13521	0	0	7	pSC.PGC.Mitotic.1_larvae
NvAeGly-1 : NV2.23295	0.00630281	0.783875	7	pSC.PGC.Mitotic.1_larvae
NvBr3-like-1 : NV2.21872	0	0	7	pSC.PGC.Mitotic.1_larvae
NvBr3-like-2 : NV2.16661	0	0	6	pSC.PGC.Mitotic.1_larvae
NvCAdh-like 1 : NV2.25851	0.0462963	5.93505	8	pSC.PGC.Mitotic.1_larvae
NvCAdh-like 2 : NV2.1610	0.0638779	7.27884	7	pSC.PGC.Mitotic.1_larvae
NvCAdh-like 3 : NV2.16479	0.0013834	0.335946	7	pSC.PGC.Mitotic.1_larvae
NvCAdh-like 4 : NV2.12411	0	0	7	pSC.PGC.Mitotic.1_larvae
NvCAdh-like 5 : NV2.21271	0.0146451	2.01568	7	pSC.PGC.Mitotic.1_larvae
NvCrumbs-like-1 : NV2.14808	0.000506248	0.111982	6	pSC.PGC.Mitotic.1_larvae
NvCrumbs-like-2 : NV2.6021	0.000455471	0.111982	7	pSC.PGC.Mitotic.1_larvae
NvCrumbs-like-3 : NV2.6444	0.0013583	0.223964	7	pSC.PGC.Mitotic.1_larvae
NvCrumbs-like-4 : NV2.10727	0.00431645	0.335946	7	pSC.PGC.Mitotic.1_larvae
NvCrumbs-like-5 : NV2.11903	0.0149418	0.783875	7	pSC.PGC.Mitotic.1_larvae
NvCrumbs-like-6 : NV2.19821	0.0371431	4.3673	13	pSC.PGC.Mitotic.1_larvae
NvCub-1 : NV2.2825	0.00731386	1.00784	7	pSC.PGC.Mitotic.1_larvae
NvCub-2 : NV2.3736	0.00562863	0.55991	6	pSC.PGC.Mitotic.1_larvae
NvCub-3 : NV2.3026	0	0	7	pSC.PGC.Mitotic.1_larvae
NvCub-4 : NV2.2814	0.0330942	4.47928	9	pSC.PGC.Mitotic.1_larvae
NvCub-5 : NV2.5224	0.0012268	0.111982	6	pSC.PGC.Mitotic.1_larvae
NvCub-6 : NV2.13183	0.611146	48.1523	10	pSC.PGC.Mitotic.1_larvae
NvFnt-3 : NV2.16585	0	0	7	pSC.PGC.Mitotic.1_larvae
NvFnt-1 : NV2.24355	0.013253	1.34378	8	pSC.PGC.Mitotic.1_larvae
NvFnt-ShKT : NV2.20323	0.00273608	0.335946	7	pSC.PGC.Mitotic.1_larvae
NvFnt-SEA2 : NV2.19078	0	0	7	pSC.PGC.Mitotic.1_larvae
NvFnt-3B-like : NV2.22291	0.02995	4.14334	5	pSC.PGC.Mitotic.1_larvae
NvFnt-2 : NV2.12498	0.0620312	7.05487	11	pSC.PGC.Mitotic.1_larvae
NvFnt-CalX : NV2.23270	0.030985	3.47144	7	pSC.PGC.Mitotic.1_larvae
NvFrzCub-1 : NV2.24045	0	0	7	pSC.PGC.Mitotic.1_larvae
NvFrzCub-2 : NV2.24249	0.0120774	1.11982	6	pSC.PGC.Mitotic.1_larvae
NvHml-like 1 : NV2.3375	0	0	7	pSC.PGC.Mitotic.1_larvae
NvHml-like 2 : NV2.5728	0.00185442	0.223964	7	pSC.PGC.Mitotic.1_larvae
NvHml-like 3 : NV2.244	0.00442967	0.55991	6	pSC.PGC.Mitotic.1_larvae
NvHgfA-like : NV2.1272	0.00173489	0.223964	16	pSC.PGC.Mitotic.1_larvae
NvHetC-like : NV2.2146	0.00063046	0.223964	6	pSC.PGC.Mitotic.1_larvae
NvHCF1 : NV2.3399	0.171445	17.8052	15	pSC.PGC.Mitotic.1_larvae
NvIgCub : NV2.7762	0.000645653	0.111982	6	pSC.PGC.Mitotic.1_larvae
NvLeuIg-1 : NV2.988	0.108727	12.318	8	pSC.PGC.Mitotic.1_larvae
NvLRPCub : NV2.24145	0.00439411	0.335946	7	pSC.PGC.Mitotic.1_larvae
NvMAMCUB : NV2.23484	0.000442058	0.111982	7	pSC.PGC.Mitotic.1_larvae
NvMAMFnt : NV2.14399	0.000657712	0.111982	7	pSC.PGC.Mitotic.1_larvae
NvMLR : NV2.6810	0	0	7	pSC.PGC.Mitotic.1_larvae
NvNep8 : NV2.20322	0.000857443	0.111982	7	pSC.PGC.Mitotic.1_larvae
NvPNtx1 : NV2.23160	0	0	NA	pSC.PGC.Mitotic.1_larvae
NvPIPlc : NV2.23846	0	0	6	pSC.PGC.Mitotic.1_larvae
NvPk : NV2.24201	0.000939447	0.111982	7	pSC.PGC.Mitotic.1_larvae
NvTDA6-1 : NV2.21336	0	0	7	pSC.PGC.Mitotic.1_larvae
NvTDA6-2 : NV2.2896	0.408157	24.1881	8	pSC.PGC.Mitotic.1_larvae
NvRyn1 : NV2.17096	0	0	7	pSC.PGC.Mitotic.1_larvae
NvRyn4 : NV2.4953	0.0312669	4.25532	12	pSC.PGC.Mitotic.1_larvae
NvShoc2 : NV2.890	0.128816	14.7816	12	pSC.PGC.Mitotic.1_larvae
NvScrib : NV2.5524	1.04881	58.1187	13	pSC.PGC.Mitotic.1_larvae
NvSIntN : NV2.650	0	0	7	pSC.PGC.Mitotic.1_larvae
NvSPP-like-1 : NV2.16360	0.000604549	0.223964	7	pSC.PGC.Mitotic.1_larvae
NvSPP-like-2 : NV2.14010	0.00422616	0.335946	7	pSC.PGC.Mitotic.1_larvae
NvSPP-like-3 : NV2.24359	0	0	7	pSC.PGC.Mitotic.1_larvae
NvTLDcP-1 : NV2.23765	0	0	7	pSC.PGC.Mitotic.1_larvae
NvTLDcP-2 : NV2.6705	0	0	6	pSC.PGC.Mitotic.1_larvae
NvTLDcP-3 : NV2.14920	0	0	7	pSC.PGC.Mitotic.1_larvae
NvTLDcP-5 : NV2.14921	0.00331387	0.335946	7	pSC.PGC.Mitotic.1_larvae
NvTSPd-2 : NV2.21289	0.0245629	3.1355	9	pSC.PGC.Mitotic.1_larvae
NvUru-like-1 : NV2.12183	0.0534345	5.15118	8	pSC.PGC.Mitotic.1_larvae
NvUru-like-2 : NV2.23645	0	0	6	pSC.PGC.Mitotic.1_larvae
NvVef1-1 : NV2.3941	0.00370556	0.111982	9	pSC.PGC.Mitotic.1_larvae
NvVef1-2 : NV2.3719	0	0	7	pSC.PGC.Mitotic.1_larvae
NvVef1-3 : NV2.4600	0	0	6	pSC.PGC.Mitotic.1_larvae
NvvWFAShKT-1 : NV2.8258	0.00134033	0.223964	7	pSC.PGC.Mitotic.1_larvae
NvvWFAShKT-2 : NV2.8260	0.00359766	0.55991	7	pSC.PGC.Mitotic.1_larvae
NvvThy : NV2.14046	0.0231122	2.35162	7	pSC.PGC.Mitotic.1_larvae
NvPkd1-like-1 : NV2.4979	0.00389179	0.223964	7	pSC.PGC.Mitotic.1_larvae
NvPkd1-like-2 : NV2.20778	0.588248	46.9205	12	pSC.PGC.Mitotic.1_larvae
NvPkd-like : NV2.18257	0.00419204	0.55991	7	pSC.PGC.Mitotic.1_larvae
NvTRP : NV2.10225	0.309044	27.3236	19	pSC.PGC.Mitotic.1_larvae
NvVgccA2-1 : NV2.16117	0.101121	11.4222	10	pSC.PGC.Mitotic.1_larvae
NvVgccA2-2 : NV2.3042	0.0843481	9.18253	6	pSC.PGC.Mitotic.1_larvae
NvCapcl-like-1 : NV2.3951	0	0	7	pSC.PGC.Mitotic.1_larvae
NvCapcl-like-2 : NV2.3157	0.00119252	0.335946	7	pSC.PGC.Mitotic.1_larvae
NvAdh-like-1 : NV2.21728	0.00215267	0.111982	7	pSC.PGC.Mitotic.1_larvae
NvAdh-like-2 : NV2.570	0	0	7	pSC.PGC.Mitotic.1_larvae
NvAdhGPCR-1 : NV2.21788	0.0519906	5.37514	8	pSC.PGC.Mitotic.1_larvae
NvAdhGPCR-2 : NV2.1634	0.0329417	3.58343	8	pSC.PGC.Mitotic.1_larvae
NvAdhGPCR-3 : NV2.502	0.0349783	4.03135	9	pSC.PGC.Mitotic.1_larvae
NvAdhGPCR-4 : NV2.743	0.0174296	1.79171	6	pSC.PGC.Mitotic.1_larvae
NvAntxR-1 : NV2.5700	0.0493892	6.271	6	pSC.PGC.Mitotic.1_larvae
NvAntxR-2 : NV2.8769	0	0	7	pSC.PGC.Mitotic.1_larvae
NvAntxR-3 : NV2.8406	0.00238998	0.223964	7	pSC.PGC.Mitotic.1_larvae
NvAntxR-4 : NV2.8980	0	0	7	pSC.PGC.Mitotic.1_larvae
NvAntxR-5 : NV2.21936	0.00329141	0.335946	7	pSC.PGC.Mitotic.1_larvae
NvApex-1 : NV2.7757	0.00255673	0.447928	7	pSC.PGC.Mitotic.1_larvae
NvApex-2 : NV2.893	0	0	6	pSC.PGC.Mitotic.1_larvae
NvApex-3 : NV2.6315	0.00266311	0.223964	7	pSC.PGC.Mitotic.1_larvae
NvApex-4 : NV2.7641	0.00131744	0.111982	6	pSC.PGC.Mitotic.1_larvae
NvAtrn : NV2.18302	0.120474	13.4378	9	pSC.PGC.Mitotic.1_larvae
NvBai-1 : NV2.10733	0	0	7	pSC.PGC.Mitotic.1_larvae
NvCD34-1 : NV2.17446	0	0	6	pSC.PGC.Mitotic.1_larvae
NvCD34-2 : NV2.17449	0	0	7	pSC.PGC.Mitotic.1_larvae
NvClsr-like-1 : NV2.4191	0.00172759	0.111982	7	pSC.PGC.Mitotic.1_larvae
NvClsr-like-2 : NV2.8347	0.0830913	9.07055	10	pSC.PGC.Mitotic.1_larvae
NvClsr-like-3 : NV2.13293	0.00407484	0.447928	7	pSC.PGC.Mitotic.1_larvae
NvCadSeaEGF : NV2.5727	0.00158176	0.223964	7	pSC.PGC.Mitotic.1_larvae
NvCDH-1 : NV2.4715	0.0646321	5.48712	6	pSC.PGC.Mitotic.1_larvae
NvCDH-2 : NV2.11625	0	0	7	pSC.PGC.Mitotic.1_larvae
NvCDH-3 : NV2.4921	0.29195	25.9798	14	pSC.PGC.Mitotic.1_larvae
NvCntcP-like-1 : NV2.16567	0	0	7	pSC.PGC.Mitotic.1_larvae
NvCntcP-like-2 : NV2.4683	0.00331778	0.447928	7	pSC.PGC.Mitotic.1_larvae
NvCntcP-like-3 : NV2.4704	0	0	7	pSC.PGC.Mitotic.1_larvae
NvCntc-like : NV2.360	0.0344898	3.02352	7	pSC.PGC.Mitotic.1_larvae
NvCpne-1 : NV2.137	0.123517	14.4457	10	pSC.PGC.Mitotic.1_larvae
NvCpne-2 : NV2.4625	0.12541	13.3259	11	pSC.PGC.Mitotic.1_larvae
NvCykR-1 : NV2.21729	0	0	7	pSC.PGC.Mitotic.1_larvae
NvCykR-10 : NV2.16931	0	0	8	pSC.PGC.Mitotic.1_larvae
NvCykR-11 : NV2.22551	0	0	7	pSC.PGC.Mitotic.1_larvae
NvCykR-12 : NV2.12207	0	0	NA	pSC.PGC.Mitotic.1_larvae
NvCykR-13 : NV2.1800	0.00198084	0.223964	8	pSC.PGC.Mitotic.1_larvae
NvCykR-14 : NV2.11900	0	0	7	pSC.PGC.Mitotic.1_larvae
NvCykR-15 : NV2.12582	0	0	7	pSC.PGC.Mitotic.1_larvae
NvCykR-2 : NV2.3810	0.00990781	1.00784	7	pSC.PGC.Mitotic.1_larvae
NvCykR-3 : NV2.22951	0	0	7	pSC.PGC.Mitotic.1_larvae
NvCykR-4 : NV2.14182	0.0128524	1.2318	6	pSC.PGC.Mitotic.1_larvae
NvCykR-5 : NV2.2940	0	0	7	pSC.PGC.Mitotic.1_larvae
NvCykR-6 : NV2.3577	0	0	7	pSC.PGC.Mitotic.1_larvae
NvCykR-7 : NV2.9493	0.0515669	6.271	12	pSC.PGC.Mitotic.1_larvae
NvCykR-8 : NV2.10456	0.117628	14.3337	11	pSC.PGC.Mitotic.1_larvae
NvCykR-9 : NV2.17701	0.00663157	1.00784	11	pSC.PGC.Mitotic.1_larvae
NvFrazz : NV2.14222	0.198035	20.0448	7	pSC.PGC.Mitotic.1_larvae
NvDomCykR-1 : NV2.12653	0.135903	14.6697	12	pSC.PGC.Mitotic.1_larvae
NvDomCykR-2 : NV2.20188	0	0	7	pSC.PGC.Mitotic.1_larvae
NvDomCykR-3 : NV2.20819	0.0181698	1.79171	8	pSC.PGC.Mitotic.1_larvae
NvDomCykR-4 : NV2.23796	0.00300317	0.55991	7	pSC.PGC.Mitotic.1_larvae
NvDom : NV2.22950	0	0	7	pSC.PGC.Mitotic.1_larvae
NvDomR : NV2.11373	0.00229948	0.447928	7	pSC.PGC.Mitotic.1_larvae
NvDscaml : NV2.22749	0.00179024	0.223964	6	pSC.PGC.Mitotic.1_larvae
NvEGF-2 : NV2.10370	0	0	8	pSC.PGC.Mitotic.1_larvae
NvPolyEGF-PANApp : NV2.16090	0	0	7	pSC.PGC.Mitotic.1_larvae
NvPolyEGF-Disc-2 : NV2.3396	0.00728756	0.447928	6	pSC.PGC.Mitotic.1_larvae
NvPolyEGF-Disc-5 : NV2.19905	0	0	7	pSC.PGC.Mitotic.1_larvae
NvPolyEGF-Disc-6 : NV2.24544	0.00143163	0.111982	7	pSC.PGC.Mitotic.1_larvae
NvPolyEGF-Disc-7 : NV2.24611	0	0	7	pSC.PGC.Mitotic.1_larvae
NvPolyEGF-Hint : NV2.12346	0.00292648	0.447928	6	pSC.PGC.Mitotic.1_larvae
NvPolyEGF-16 : NV2.24533	0.0325181	3.69541	10	pSC.PGC.Mitotic.1_larvae
NvPolyEGF-19 : NV2.5536	0	0	8	pSC.PGC.Mitotic.1_larvae
NvEphr-like 1 : NV2.13270	0.0930701	9.85442	12	pSC.PGC.Mitotic.1_larvae
NvEphr-like 2 : NV2.19863	0.000552561	0.111982	7	pSC.PGC.Mitotic.1_larvae
NvFAT : NV2.3227	0.0781281	8.95857	8	pSC.PGC.Mitotic.1_larvae
NvFat-like : NV2.3144	0.424829	32.8108	17	pSC.PGC.Mitotic.1_larvae
NvFatCad-1 : NV2.17172	0.00752327	0.895857	7	pSC.PGC.Mitotic.1_larvae
NvFatCad-2 : NV2.4933	0	0	6	pSC.PGC.Mitotic.1_larvae
NvEGF-repeat-35 : NV2.4783	0.0132621	1.56775	7	pSC.PGC.Mitotic.1_larvae
NvGFR-1 : NV2.25188	0	0	7	pSC.PGC.Mitotic.1_larvae
NvGFR-2 : NV2.13801	0.00159413	0.223964	7	pSC.PGC.Mitotic.1_larvae
NvIgSushi : NV2.17065	0.00126748	0.223964	7	pSC.PGC.Mitotic.1_larvae
NvIg-Thyr : NV2.21898	0	0	7	pSC.PGC.Mitotic.1_larvae
NvIgCam-1 : NV2.361	0.0322615	4.03135	4	pSC.PGC.Mitotic.1_larvae
NvIgCam-2 : NV2.14189	0.0218976	2.01568	7	pSC.PGC.Mitotic.1_larvae
NvIgCam-3 : NV2.15289	0.0796753	8.7346	8	pSC.PGC.Mitotic.1_larvae
NvIgCam-4 : NV2.15862	0.00499319	0.335946	6	pSC.PGC.Mitotic.1_larvae
NvIgCam-5 : NV2.21828	0.000456883	0.111982	7	pSC.PGC.Mitotic.1_larvae
NvIgCam-6 : NV2.21855	0.211127	23.5162	14	pSC.PGC.Mitotic.1_larvae
NvIgCam-7 : NV2.21994	0.0897799	9.63046	8	pSC.PGC.Mitotic.1_larvae
NvIgCam-8 : NV2.22319	0.00330079	0.447928	7	pSC.PGC.Mitotic.1_larvae
NvIgCam-9 : NV2.22600	0.0360818	5.15118	9	pSC.PGC.Mitotic.1_larvae
NvIgCamZP : NV2.21903	0.238137	24.972	17	pSC.PGC.Mitotic.1_larvae
NvIgCam-related-1 : NV2.22270	0	0	7	pSC.PGC.Mitotic.1_larvae
NvIgCam-related-2 : NV2.325	0.00822469	0.55991	7	pSC.PGC.Mitotic.1_larvae
NvIGF : NV2.23604	0.0250204	2.46361	8	pSC.PGC.Mitotic.1_larvae
NvL1Cam-1 : NV2.1171	0.632592	46.1366	12	pSC.PGC.Mitotic.1_larvae
NvL1Cam-2 : NV2.702	0.0274946	3.35946	8	pSC.PGC.Mitotic.1_larvae
NvLRP-Polydom : NV2.788	0.00381608	0.447928	6	pSC.PGC.Mitotic.1_larvae
NvLeuGPCR-like-1 : NV2.2571	0	0	7	pSC.PGC.Mitotic.1_larvae
NvLeuGPCR-like-2 : NV2.7502	0	0	7	pSC.PGC.Mitotic.1_larvae
NvLeuGPCR-like-3 : NV2.17941	0	0	7	pSC.PGC.Mitotic.1_larvae
NvLeuGPCR-like-4 : NV2.20131	0.00309733	0.223964	6	pSC.PGC.Mitotic.1_larvae
NvLeuGPCR-like-5 : NV2.15921	0.0028557	0.223964	8	pSC.PGC.Mitotic.1_larvae
NvLeuGPCR-like-6 : NV2.22026	0.00133024	0.223964	7	pSC.PGC.Mitotic.1_larvae
NvLeu : NV2.12452	0.00210256	0.111982	7	pSC.PGC.Mitotic.1_larvae
NvLeuIg-2 : NV2.24051	0.00167588	0.111982	6	pSC.PGC.Mitotic.1_larvae
NvLRP-like : NV2.14749	0	0	6	pSC.PGC.Mitotic.1_larvae
NvLRP1/2 : NV2.12145	0.0495316	5.15118	12	pSC.PGC.Mitotic.1_larvae
NvMANSCR-1 : NV2.5949	0.0460566	5.15118	7	pSC.PGC.Mitotic.1_larvae
NvMANSCR-2 : NV2.22155	0.00319487	0.335946	7	pSC.PGC.Mitotic.1_larvae
NvMmanR-1 : NV2.12165	0.00650086	0.671892	7	pSC.PGC.Mitotic.1_larvae
NvMmanR-2 : NV2.9511	0.000813587	0.111982	7	pSC.PGC.Mitotic.1_larvae
NvMmanR-3 : NV2.12172	0.0030296	0.447928	7	pSC.PGC.Mitotic.1_larvae
NvNCAM-1 : NV2.21158	0.0468746	5.48712	7	pSC.PGC.Mitotic.1_larvae
NvNCAM1-1 : NV2.21902	1.28137	69.9888	14	pSC.PGC.Mitotic.1_larvae
NvNCAM-2 : NV2.21211	0.00877376	1.11982	10	pSC.PGC.Mitotic.1_larvae
NvNCAM-6 : NV2.21924	0.00436986	0.895857	5	pSC.PGC.Mitotic.1_larvae
NvNCAM-like-1 : NV2.18115	0.0025085	0.335946	7	pSC.PGC.Mitotic.1_larvae
NvNCAM-like-2 : NV2.20308	0.288441	28.3315	8	pSC.PGC.Mitotic.1_larvae
NvNCAM-like-3 : NV2.21151	0.10992	13.2139	9	pSC.PGC.Mitotic.1_larvae
NvNCAM-related-1 : NV2.22495	0.376912	34.0426	10	pSC.PGC.Mitotic.1_larvae
NvNCAM-related-2 : NV2.22081	0.0291307	3.35946	8	pSC.PGC.Mitotic.1_larvae
NvNCAM-related-3 : NV2.25565	0.0477957	4.92721	9	pSC.PGC.Mitotic.1_larvae
NvUNC5 : NV2.14588	0.00946014	1.2318	8	pSC.PGC.Mitotic.1_larvae
NvNrxn : NV2.11326	1.13699	67.3012	20	pSC.PGC.Mitotic.1_larvae
NvNrxn-like-1 : NV2.16569	0	0	7	pSC.PGC.Mitotic.1_larvae
NvNrxn-like-2 : NV2.17148	0	0	7	pSC.PGC.Mitotic.1_larvae
NvNrxn-like-3 : NV2.19653	0.00287213	0.447928	6	pSC.PGC.Mitotic.1_larvae
NvNrxn-like-4 : NV2.9601	0.729321	53.3035	10	pSC.PGC.Mitotic.1_larvae
NvNrxn-like-5 : NV2.17038	0	0	7	pSC.PGC.Mitotic.1_larvae
NvNrxn-like-6 : NV2.17107	0.00139978	0.111982	7	pSC.PGC.Mitotic.1_larvae
NvNrpTol1l-like : NV2.14795	0.115091	13.1019	8	pSC.PGC.Mitotic.1_larvae
NvNrp-related : NV2.6344	0.0466319	6.04703	6	pSC.PGC.Mitotic.1_larvae
NvHedgeling : NV2.2229	0	0	6	pSC.PGC.Mitotic.1_larvae
NvOIT3-1 : NV2.24478	0	0	7	pSC.PGC.Mitotic.1_larvae
NvOIT3-2 : NV2.25392	0	0	7	pSC.PGC.Mitotic.1_larvae
NvOIT3-3 : NV2.25393	0.00075725	0.111982	8	pSC.PGC.Mitotic.1_larvae
NvPINLabA : NV2.11073	0	0	6	pSC.PGC.Mitotic.1_larvae
NvPlxn : NV2.2812	0.0107518	1.11982	8	pSC.PGC.Mitotic.1_larvae
NvSdk1 : NV2.6892	0.0254821	2.12766	8	pSC.PGC.Mitotic.1_larvae
NvTlpB : NV2.21328	0.0252469	2.68757	5	pSC.PGC.Mitotic.1_larvae
NvFATPCad4-like-1 : NV2.8636	0.0755252	8.7346	13	pSC.PGC.Mitotic.1_larvae
NvFATPCad4-like-2 : NV2.23593	0	0	7	pSC.PGC.Mitotic.1_larvae
NvFATPCad4-like-3 : NV2.23594	0	0	7	pSC.PGC.Mitotic.1_larvae
NvPCad : NV2.4934	0.00413579	0.335946	6	pSC.PGC.Mitotic.1_larvae
NvROR2-like : NV2.6768	0.00312123	0.447928	7	pSC.PGC.Mitotic.1_larvae
NvPTypPF-like : NV2.12583	0.00102491	0.111982	7	pSC.PGC.Mitotic.1_larvae
NvPTypP-like : NV2.601	0.0013925	0.223964	7	pSC.PGC.Mitotic.1_larvae
NvPTypP-related : NV2.11797	0.0159257	1.9037	7	pSC.PGC.Mitotic.1_larvae
NvRobo-like : NV2.21353	0.102837	11.9821	7	pSC.PGC.Mitotic.1_larvae
NvScaraA : NV2.24984	0.004592	0.447928	7	pSC.PGC.Mitotic.1_larvae
NvScara1-like-1 : NV2.12749	0	0	7	pSC.PGC.Mitotic.1_larvae
NvScara1-like-2 : NV2.22574	0.12339	12.318	12	pSC.PGC.Mitotic.1_larvae
NvScara1-like-3 : NV2.17488	0.0101787	1.79171	9	pSC.PGC.Mitotic.1_larvae
NvScara1-like-4 : NV2.24169	0.289398	30.5711	8	pSC.PGC.Mitotic.1_larvae
NvScara-like : NV2.6127	0.00055169	0.111982	7	pSC.PGC.Mitotic.1_larvae
NvSThrR : NV2.14724	0.0289627	1.11982	7	pSC.PGC.Mitotic.1_larvae
NvSEF-like : NV2.2939	0.0622325	6.04703	8	pSC.PGC.Mitotic.1_larvae
NvSnaclec-like-1 : NV2.25143	0.0909197	10.7503	10	pSC.PGC.Mitotic.1_larvae
NvSortR : NV2.16213	0.260502	25.7559	16	pSC.PGC.Mitotic.1_larvae
NvSpadh-like-1 : NV2.20657	0.000506248	0.111982	7	pSC.PGC.Mitotic.1_larvae
NvSpadh-like-2 : NV2.3538	0.117749	12.8779	17	pSC.PGC.Mitotic.1_larvae
NvSpadh-like-3 : NV2.3539	0.00253813	0.111982	8	pSC.PGC.Mitotic.1_larvae
NvSpadh-like-4 : NV2.14569	0.00833886	1.11982	7	pSC.PGC.Mitotic.1_larvae
NvStab2 : NV2.1696	0.143191	13.6618	8	pSC.PGC.Mitotic.1_larvae
NvSOL-like-1 : NV2.14373	0.043178	4.92721	5	pSC.PGC.Mitotic.1_larvae
NvSOL-like-10 : NV2.16314	0.00139889	0.335946	7	pSC.PGC.Mitotic.1_larvae
NvSOL-like-11 : NV2.16315	0.24124	15.6775	20	pSC.PGC.Mitotic.1_larvae
NvSOL-like-2 : NV2.22311	0.000924555	0.111982	8	pSC.PGC.Mitotic.1_larvae
NvSOL-like-3 : NV2.1288	0.387501	36.2822	11	pSC.PGC.Mitotic.1_larvae
NvSOL-like-4 : NV2.3066	0	0	7	pSC.PGC.Mitotic.1_larvae
NvSOL-like-5 : NV2.3167	0.113093	13.2139	11	pSC.PGC.Mitotic.1_larvae
NvSOL-like-6 : NV2.3169	0.156657	18.477	7	pSC.PGC.Mitotic.1_larvae
NvSOL-like-7 : NV2.3625	0.527981	44.9048	10	pSC.PGC.Mitotic.1_larvae
NvSOL-like-8 : NV2.3699	0.0357766	3.24748	6	pSC.PGC.Mitotic.1_larvae
NvSOL-like-9 : NV2.13356	0.0909374	10.4143	8	pSC.PGC.Mitotic.1_larvae
NvSRPX-like : NV2.1314	0	0	7	pSC.PGC.Mitotic.1_larvae
NvSushiEGFZP-1 : NV2.12863	0.0115343	1.45577	6	pSC.PGC.Mitotic.1_larvae
NvSushiEGFZP-2 : NV2.12864	0.00668458	0.671892	6	pSC.PGC.Mitotic.1_larvae
NvTGFbR : NV2.5822	0.100023	12.766	6	pSC.PGC.Mitotic.1_larvae
NvTNF-R : NV2.21120	0.0539446	6.71892	10	pSC.PGC.Mitotic.1_larvae
NvTSP-SEA-1 : NV2.18776	0.00324389	0.223964	12	pSC.PGC.Mitotic.1_larvae
NvTSP-SEA-2 : NV2.19022	0	0	7	pSC.PGC.Mitotic.1_larvae
NvTSPd-1 : NV2.24334	0.0346155	4.14334	7	pSC.PGC.Mitotic.1_larvae
NvTSPd-4 : NV2.18394	0.0142901	1.56775	6	pSC.PGC.Mitotic.1_larvae
NvTSPd-5 : NV2.22114	0.119824	13.6618	8	pSC.PGC.Mitotic.1_larvae
NvTSPDiscEGF : NV2.1784	0	0	7	pSC.PGC.Mitotic.1_larvae
NvTSP-TLD : NV2.8772	0	0	7	pSC.PGC.Mitotic.1_larvae
NvThyr-TSP-EGF : NV2.4066	0.0168851	2.01568	7	pSC.PGC.Mitotic.1_larvae
NvTyrRor2-like : NV2.12077	0	0	6	pSC.PGC.Mitotic.1_larvae
NvvLDL-1 : NV2.1025	0.11517	12.43	7	pSC.PGC.Mitotic.1_larvae
NvvLDL-2 : NV2.1337	0.325892	27.7716	5	pSC.PGC.Mitotic.1_larvae
NvvLDL-3 : NV2.9849	0.0304077	2.23964	6	pSC.PGC.Mitotic.1_larvae
NvVgtR-like-1 : NV2.12147	0.0129933	1.45577	8	pSC.PGC.Mitotic.1_larvae
NvVgtR-like-2 : NV2.18927	0	0	7	pSC.PGC.Mitotic.1_larvae
NvWAPIgZP-1 : NV2.11345	0.113601	11.7581	13	pSC.PGC.Mitotic.1_larvae
NvWAPIgZP-2 : NV2.11632	0.0015416	0.111982	7	pSC.PGC.Mitotic.1_larvae
NvZP-1 : NV2.5824	2.1964	78.0515	12	pSC.PGC.Mitotic.1_larvae
NvZP-2 : NV2.11069	0.11233	13.3259	13	pSC.PGC.Mitotic.1_larvae
NvZP-3 : NV2.21905	0.00705035	0.671892	9	pSC.PGC.Mitotic.1_larvae
NvZP-4 : NV2.22367	0	0	7	pSC.PGC.Mitotic.1_larvae
NvvWFAc1-1 : NV2.628	0.000501892	0.111982	7	pSC.PGC.Mitotic.1_larvae
NvvWFAc1-2 : NV2.903	0.0274173	2.91153	18	pSC.PGC.Mitotic.1_larvae
NvvWFAc1-3 : NV2.1994	0.00470984	0.671892	7	pSC.PGC.Mitotic.1_larvae
NvCol4b : NV2.21409	0.557662	22.5464	9	pSC.PGC.Mitotic.1_p.polyp
NvNCol-3 : NV2.10686	0.225793	11.1406	6	pSC.PGC.Mitotic.1_p.polyp
NvTSPEAR : NV2.8096	0.155467	11.9363	8	pSC.PGC.Mitotic.1_p.polyp
NvCol6-like-1 : NV2.23164	0	0	7	pSC.PGC.Mitotic.1_p.polyp
NvCol6-like-2 : NV2.23710	0	0	7	pSC.PGC.Mitotic.1_p.polyp
NvCol6-like-3 : NV2.24229	0.047875	2.65252	9	pSC.PGC.Mitotic.1_p.polyp
NvCol6-like-4 : NV2.14089	0	0	7	pSC.PGC.Mitotic.1_p.polyp
NvCol18 : NV2.11420	0.085021	4.77454	12	pSC.PGC.Mitotic.1_p.polyp
NvColIg : NV2.9101	0.0167968	1.32626	8	pSC.PGC.Mitotic.1_p.polyp
NvCTHRC : NV2.2667	0	0	7	pSC.PGC.Mitotic.1_p.polyp
NvCol4 : NV2.21411	0.0680401	2.91777	6	pSC.PGC.Mitotic.1_p.polyp
NvCol-7 : NV2.24375	0.0231704	1.06101	6	pSC.PGC.Mitotic.1_p.polyp
NvCol-like-1 : NV2.5987	0.00456073	0.265252	7	pSC.PGC.Mitotic.1_p.polyp
NvCol-like-10 : NV2.13883	0	0	7	pSC.PGC.Mitotic.1_p.polyp
NvCol-like-2 : NV2.19801	0.050463	3.71353	20	pSC.PGC.Mitotic.1_p.polyp
NvCol-like-3 : NV2.21821	0	0	6	pSC.PGC.Mitotic.1_p.polyp
NvCol-like-4 : NV2.21793	0	0	7	pSC.PGC.Mitotic.1_p.polyp
NvCol-like-5 : NV2.19798	0.0181639	0.795756	8	pSC.PGC.Mitotic.1_p.polyp
NvCol-like-6 : NV2.19811	0.173488	10.8753	20	pSC.PGC.Mitotic.1_p.polyp
NvCol-like-7 : NV2.20296	0	0	6	pSC.PGC.Mitotic.1_p.polyp
NvCol-like-8 : NV2.7052	0	0	7	pSC.PGC.Mitotic.1_p.polyp
NvCol-like-9 : NV2.8768	0	0	7	pSC.PGC.Mitotic.1_p.polyp
NvCol1a : NV2.24535	0.0514951	3.18302	7	pSC.PGC.Mitotic.1_p.polyp
NvCol1b : NV2.11872	0.0239909	1.06101	7	pSC.PGC.Mitotic.1_p.polyp
NvCol1c : NV2.12027	0.116709	6.89655	6	pSC.PGC.Mitotic.1_p.polyp
NvCol2a : NV2.12159	0.0654135	4.50928	9	pSC.PGC.Mitotic.1_p.polyp
NvCol2b : NV2.12104	0.152622	7.69231	7	pSC.PGC.Mitotic.1_p.polyp
NvCol5 : NV2.24536	0.0817801	5.83554	8	pSC.PGC.Mitotic.1_p.polyp
NvCol2c : NV2.10959	0.144373	6.89655	7	pSC.PGC.Mitotic.1_p.polyp
NvNCol-7 : NV2.11814	0.0348948	2.12202	7	pSC.PGC.Mitotic.1_p.polyp
NvNCol1 : NV2.12621	0.114869	3.71353	7	pSC.PGC.Mitotic.1_p.polyp
NvNCol4 : NV2.11801	0.0933138	3.71353	7	pSC.PGC.Mitotic.1_p.polyp
NvNCol5 : NV2.11802	0.0619887	4.77454	7	pSC.PGC.Mitotic.1_p.polyp
NvNCol6 : NV2.11815	0.724657	21.7507	7	pSC.PGC.Mitotic.1_p.polyp
NvNCol-like 1 : NV2.363	0	0	7	pSC.PGC.Mitotic.1_p.polyp
NvNCol-like 3 : NV2.11816	0.0693454	2.12202	7	pSC.PGC.Mitotic.1_p.polyp
NvNCol-like 4 : NV2.11818	0	0	7	pSC.PGC.Mitotic.1_p.polyp
NvSpongin-like-1 : NV2.7278	0	0	7	pSC.PGC.Mitotic.1_p.polyp
NvSpongin-like-2 : NV2.7899	0.0173077	1.06101	7	pSC.PGC.Mitotic.1_p.polyp
NvSpongin-like-3 : NV2.8393	0.0451295	2.91777	8	pSC.PGC.Mitotic.1_p.polyp
NvSpongin-like-4 : NV2.8836	0	0	7	pSC.PGC.Mitotic.1_p.polyp
NvLpxACol : NV2.11419	0.130095	9.01857	20	pSC.PGC.Mitotic.1_p.polyp
NvvWFAGGP : NV2.8259	0	0	7	pSC.PGC.Mitotic.1_p.polyp
NvvWFA-1 : NV2.856	0.0198658	1.32626	8	pSC.PGC.Mitotic.1_p.polyp
NvArgn-1 : NV2.14093	0.00309874	0.265252	7	pSC.PGC.Mitotic.1_p.polyp
NvArgn-2 : NV2.13522	0.0374393	1.59151	7	pSC.PGC.Mitotic.1_p.polyp
NvDSLvWFA : NV2.9243	0.0300739	0.265252	8	pSC.PGC.Mitotic.1_p.polyp
NvDMBT-1 : NV2.14958	0.280841	16.7109	8	pSC.PGC.Mitotic.1_p.polyp
NvDMBT-2 : NV2.24741	0.00631718	0.795756	8	pSC.PGC.Mitotic.1_p.polyp
NvDSPP : NV2.13059	0.0103262	0.530504	7	pSC.PGC.Mitotic.1_p.polyp
NvDisc-Ig : NV2.1116	0	0	7	pSC.PGC.Mitotic.1_p.polyp
NvDisc-SEA : NV2.12171	0.00332063	0.265252	7	pSC.PGC.Mitotic.1_p.polyp
NvDisc-Sushi-1 : NV2.25722	0	0	7	pSC.PGC.Mitotic.1_p.polyp
NvDisc-Sushi-2 : NV2.25724	0.0224357	1.59151	10	pSC.PGC.Mitotic.1_p.polyp
NvDisc : NV2.997	0.0214778	0.795756	9	pSC.PGC.Mitotic.1_p.polyp
EGF-triLpxA : NV2.12181	0.00568964	0.530504	9	pSC.PGC.Mitotic.1_p.polyp
NvPolyEGF-PTX-1 : NV2.5962	0	0	7	pSC.PGC.Mitotic.1_p.polyp
NvPolyEGF-PTX-2 : NV2.23171	0.00433105	0.530504	7	pSC.PGC.Mitotic.1_p.polyp
NvPolyEGF-Sushi-Ig : NV2.17270	0.00992785	0.530504	7	pSC.PGC.Mitotic.1_p.polyp
NvEGF-1 : NV2.10398	0	0	7	pSC.PGC.Mitotic.1_p.polyp
NvAdhGPCR-E1 : NV2.20524	0.00529992	0.530504	7	pSC.PGC.Mitotic.1_p.polyp
NvPolyEGF-Disc-1 : NV2.10636	0.0247836	1.06101	8	pSC.PGC.Mitotic.1_p.polyp
NvPolyEGF-Disc-3 : NV2.13422	0	0	7	pSC.PGC.Mitotic.1_p.polyp
NvPolyEGF-Disc-4 : NV2.13802	0	0	7	pSC.PGC.Mitotic.1_p.polyp
NvPolyEGF-Disc-8 : NV2.9055	0.0364276	2.12202	11	pSC.PGC.Mitotic.1_p.polyp
NvPolyEGF-5 : NV2.6022	0.00989746	0.265252	7	pSC.PGC.Mitotic.1_p.polyp
NvPolyEGF-6 : NV2.24285	0	0	7	pSC.PGC.Mitotic.1_p.polyp
NvPolyEGF-7 : NV2.24286	0	0	7	pSC.PGC.Mitotic.1_p.polyp
NvPolyEGF-8 : NV2.23400	0	0	8	pSC.PGC.Mitotic.1_p.polyp
NvPolyEGF-9 : NV2.19497	0	0	7	pSC.PGC.Mitotic.1_p.polyp
NvPolyEGF-10 : NV2.3706	0	0	7	pSC.PGC.Mitotic.1_p.polyp
NvPolyEGF-11 : NV2.6897	0	0	7	pSC.PGC.Mitotic.1_p.polyp
NvPolyEGF-12 : NV2.7683	0.00479834	0.265252	6	pSC.PGC.Mitotic.1_p.polyp
NvPolyEGF-13 : NV2.11904	0	0	7	pSC.PGC.Mitotic.1_p.polyp
NvPolyEGF-14 : NV2.17951	0.0123135	0.530504	8	pSC.PGC.Mitotic.1_p.polyp
NvPolyEGF-15 : NV2.23650	0	0	7	pSC.PGC.Mitotic.1_p.polyp
NvPolyEGF-17 : NV2.6034	0	0	7	pSC.PGC.Mitotic.1_p.polyp
NvPolyEGF-18 : NV2.6437	0.0106101	0.265252	8	pSC.PGC.Mitotic.1_p.polyp
NvPolyEGF-20 : NV2.24543	0	0	7	pSC.PGC.Mitotic.1_p.polyp
NvEmilin1 : NV2.10668	0.00593015	0.530504	7	pSC.PGC.Mitotic.1_p.polyp
NvFbn : NV2.22931	0	0	7	pSC.PGC.Mitotic.1_p.polyp
NvFbn-1 : NV2.22930	0	0	7	pSC.PGC.Mitotic.1_p.polyp
NvFbn-2 : NV2.22932	0	0	7	pSC.PGC.Mitotic.1_p.polyp
NvFbn-3 : NV2.14812	0.0143626	0.795756	6	pSC.PGC.Mitotic.1_p.polyp
NvFib-like : NV2.10397	0	0	7	pSC.PGC.Mitotic.1_p.polyp
NvFp-like-1 : NV2.3028	0	0	7	pSC.PGC.Mitotic.1_p.polyp
NvFp-like-10 : NV2.25686	0.0111811	0.530504	8	pSC.PGC.Mitotic.1_p.polyp
NvFp-like-2 : NV2.6439	0	0	7	pSC.PGC.Mitotic.1_p.polyp
NvFp-like-3 : NV2.10691	0	0	7	pSC.PGC.Mitotic.1_p.polyp
NvFp-like-4 : NV2.5916	0.00189845	0.265252	7	pSC.PGC.Mitotic.1_p.polyp
NvFp-like-5 : NV2.5917	0.0172789	0.795756	7	pSC.PGC.Mitotic.1_p.polyp
NvFp-like-6 : NV2.5918	0.00964432	0.530504	7	pSC.PGC.Mitotic.1_p.polyp
NvFp-like-7 : NV2.6438	0.0112395	0.265252	7	pSC.PGC.Mitotic.1_p.polyp
NvFp-like-8 : NV2.6441	0.0196279	0.530504	7	pSC.PGC.Mitotic.1_p.polyp
NvFp-like-9 : NV2.13189	0	0	7	pSC.PGC.Mitotic.1_p.polyp
NvFbln : NV2.3768	0	0	6	pSC.PGC.Mitotic.1_p.polyp
NvHmcn1-like 1 : NV2.23125	0.022099	1.32626	8	pSC.PGC.Mitotic.1_p.polyp
NvHncn1 : NV2.24790	0.0235152	0.265252	8	pSC.PGC.Mitotic.1_p.polyp
NvMFGE-like-1 : NV2.10243	0	0	7	pSC.PGC.Mitotic.1_p.polyp
NvMFGE-like-2 : NV2.10407	0	0	7	pSC.PGC.Mitotic.1_p.polyp
NvMFGE-like-3 : NV2.15715	0	0	7	pSC.PGC.Mitotic.1_p.polyp
NvMFGE-like-4 : NV2.15716	0	0	7	pSC.PGC.Mitotic.1_p.polyp
NvMFGE-like-5 : NV2.5960	0	0	7	pSC.PGC.Mitotic.1_p.polyp
NvLamA1 : NV2.24158	0	0	7	pSC.PGC.Mitotic.1_p.polyp
NvLamA1-like : NV2.22840	0.0831539	5.83554	10	pSC.PGC.Mitotic.1_p.polyp
NvLamA5 : NV2.17119	0.017947	0.795756	7	pSC.PGC.Mitotic.1_p.polyp
NvLamA-like : NV2.15819	0	0	7	pSC.PGC.Mitotic.1_p.polyp
NvLamB1-1 : NV2.1719	0.00661872	0.530504	7	pSC.PGC.Mitotic.1_p.polyp
NvLamB1-2 : NV2.24496	0.11458	7.95756	9	pSC.PGC.Mitotic.1_p.polyp
NvLamB1-3 : NV2.24823	0.157814	10.0796	14	pSC.PGC.Mitotic.1_p.polyp
NvLamB2-1 : NV2.25732	0.130842	8.48806	10	pSC.PGC.Mitotic.1_p.polyp
NvLamB2-2 : NV2.25734	0.00156935	0.265252	7	pSC.PGC.Mitotic.1_p.polyp
NvLamG : NV2.25737	0.0377134	1.06101	7	pSC.PGC.Mitotic.1_p.polyp
NvMatn-1 : NV2.836	0.190719	11.6711	16	pSC.PGC.Mitotic.1_p.polyp
NvMatn-2 : NV2.840	0.00383645	0.265252	9	pSC.PGC.Mitotic.1_p.polyp
NvMatn-3 : NV2.841	0.0344986	1.32626	15	pSC.PGC.Mitotic.1_p.polyp
NvMatn-4 : NV2.842	0.0208881	1.59151	9	pSC.PGC.Mitotic.1_p.polyp
NvMatn-5 : NV2.843	0.0734335	4.77454	11	pSC.PGC.Mitotic.1_p.polyp
NvMatn-6 : NV2.845	0	0	7	pSC.PGC.Mitotic.1_p.polyp
NvMatn-7 : NV2.18428	0	0	7	pSC.PGC.Mitotic.1_p.polyp
NvMTSP : NV2.14418	0.266883	14.3236	13	pSC.PGC.Mitotic.1_p.polyp
NvMfap4-1 : NV2.7038	0	0	7	pSC.PGC.Mitotic.1_p.polyp
NvMfap4-2 : NV2.25470	0	0	7	pSC.PGC.Mitotic.1_p.polyp
NvMfap4-3 : NV2.16067	0.00569047	0.530504	8	pSC.PGC.Mitotic.1_p.polyp
NvMfap4-4 : NV2.25464	0	0	7	pSC.PGC.Mitotic.1_p.polyp
NvMfap4-5 : NV2.5873	0.0230754	1.32626	7	pSC.PGC.Mitotic.1_p.polyp
NvMfap4-6 : NV2.8818	0	0	7	pSC.PGC.Mitotic.1_p.polyp
NvMfap4-7 : NV2.17967	0	0	7	pSC.PGC.Mitotic.1_p.polyp
NvMfap1 : NV2.13515	0.23691	13.7931	8	pSC.PGC.Mitotic.1_p.polyp
NvNetr : NV2.7734	0.0194636	1.06101	7	pSC.PGC.Mitotic.1_p.polyp
NvNid : NV2.20722	0.216709	12.7321	12	pSC.PGC.Mitotic.1_p.polyp
NvNtA : NV2.12221	0.00704023	0.530504	7	pSC.PGC.Mitotic.1_p.polyp
NvOto-like-1 : NV2.6495	0	0	7	pSC.PGC.Mitotic.1_p.polyp
NvPtx-1 : NV2.18957	0	0	7	pSC.PGC.Mitotic.1_p.polyp
NvPtx-2 : NV2.3861	0	0	7	pSC.PGC.Mitotic.1_p.polyp
NvPtx-related : NV2.23776	0	0	7	pSC.PGC.Mitotic.1_p.polyp
NvPostn : NV2.20449	0	0	6	pSC.PGC.Mitotic.1_p.polyp
NvPxdn : NV2.13306	0	0	7	pSC.PGC.Mitotic.1_p.polyp
NvPika : NV2.707	0.0389584	2.38727	20	pSC.PGC.Mitotic.1_p.polyp
NvPolydom-like-1 : NV2.3561	0	0	7	pSC.PGC.Mitotic.1_p.polyp
NvPolydom-like-2 : NV2.2755	0.126022	7.1618	7	pSC.PGC.Mitotic.1_p.polyp
NvPolydom-like-3 : NV2.2824	0.00318277	0.265252	7	pSC.PGC.Mitotic.1_p.polyp
NvPolydom-like-4 : NV2.13340	0.0437163	3.18302	8	pSC.PGC.Mitotic.1_p.polyp
NvPolydom-related : NV2.11255	0.0150833	1.06101	7	pSC.PGC.Mitotic.1_p.polyp
NvPolydom1 : NV2.3792	0.00913003	0.795756	7	pSC.PGC.Mitotic.1_p.polyp
NvPolydom2 : NV2.3300	0	0	7	pSC.PGC.Mitotic.1_p.polyp
NvPolydom3 : NV2.3560	0.00905915	0.265252	7	pSC.PGC.Mitotic.1_p.polyp
NvProFnt : NV2.24561	0	0	7	pSC.PGC.Mitotic.1_p.polyp
NvCFP-1 : NV2.23465	0.0258171	1.59151	6	pSC.PGC.Mitotic.1_p.polyp
NvCFP-10 : NV2.17239	0.0375519	2.12202	7	pSC.PGC.Mitotic.1_p.polyp
NvCFP-11 : NV2.17421	0	0	7	pSC.PGC.Mitotic.1_p.polyp
NvCFP-12 : NV2.19412	0.0089899	0.795756	7	pSC.PGC.Mitotic.1_p.polyp
NvCFP-13 : NV2.23447	0.102922	7.42706	7	pSC.PGC.Mitotic.1_p.polyp
NvCFP-14 : NV2.24746	0.029341	1.59151	7	pSC.PGC.Mitotic.1_p.polyp
NvCFP-15 : NV2.25346	0	0	6	pSC.PGC.Mitotic.1_p.polyp
NvCFP-2 : NV2.15937	0	0	7	pSC.PGC.Mitotic.1_p.polyp
NvCFP-3 : NV2.10038	0	0	7	pSC.PGC.Mitotic.1_p.polyp
NvCFP-4 : NV2.11945	0	0	7	pSC.PGC.Mitotic.1_p.polyp
NvCFP-5 : NV2.13338	0.022354	1.85676	9	pSC.PGC.Mitotic.1_p.polyp
NvCFP-6 : NV2.13919	0.504186	27.0557	12	pSC.PGC.Mitotic.1_p.polyp
NvCFP-7 : NV2.13920	0.588763	31.565	19	pSC.PGC.Mitotic.1_p.polyp
NvCFP-8 : NV2.15932	0	0	7	pSC.PGC.Mitotic.1_p.polyp
NvCFP-9 : NV2.15933	0.0024524	0.265252	7	pSC.PGC.Mitotic.1_p.polyp
NvCrumbsh-1 : NV2.25658	0.143299	6.6313	11	pSC.PGC.Mitotic.1_p.polyp
NvCrumbsh-2 : NV2.25685	0.0986307	6.36605	10	pSC.PGC.Mitotic.1_p.polyp
NvEys : NV2.6047	0.107451	7.1618	8	pSC.PGC.Mitotic.1_p.polyp
NvSAMEGF : NV2.2046	0.0321897	1.32626	7	pSC.PGC.Mitotic.1_p.polyp
NvSCP-TSP-1 : NV2.17517	0	0	7	pSC.PGC.Mitotic.1_p.polyp
NvSCP-TSP-2 : NV2.17827	0.013383	0.265252	7	pSC.PGC.Mitotic.1_p.polyp
NvSPARC-related : NV2.11433	0.00807478	0.795756	7	pSC.PGC.Mitotic.1_p.polyp
NvSPARC : NV2.21613	0.0144582	0.795756	7	pSC.PGC.Mitotic.1_p.polyp
NvCUB-EGF : NV2.18054	0.00160022	0.265252	7	pSC.PGC.Mitotic.1_p.polyp
NvSlit-like-1 : NV2.7952	0.0568415	3.71353	12	pSC.PGC.Mitotic.1_p.polyp
NvSlit-like-2 : NV2.12458	0	0	7	pSC.PGC.Mitotic.1_p.polyp
NvSlit-like-3 : NV2.20861	0	0	7	pSC.PGC.Mitotic.1_p.polyp
NvSushi-1 : NV2.25124	0.0187986	0.530504	8	pSC.PGC.Mitotic.1_p.polyp
NvSushi-2 : NV2.25727	0	0	6	pSC.PGC.Mitotic.1_p.polyp
NvSushi-3 : NV2.25725	0.0301668	1.59151	12	pSC.PGC.Mitotic.1_p.polyp
NvSushi-4 : NV2.24979	0.0193788	0.530504	7	pSC.PGC.Mitotic.1_p.polyp
NvSushi-6 : NV2.24371	0.180952	7.69231	7	pSC.PGC.Mitotic.1_p.polyp
NvSushiTSP : NV2.15519	0.0175689	1.32626	7	pSC.PGC.Mitotic.1_p.polyp
NvTSR : NV2.14919	0.00305028	0.265252	7	pSC.PGC.Mitotic.1_p.polyp
NvTSPd-3 : NV2.17583	0.0155413	0.530504	7	pSC.PGC.Mitotic.1_p.polyp
NvTSRDisc : NV2.10387	0.0322263	0.795756	8	pSC.PGC.Mitotic.1_p.polyp
NvTSR-1 : NV2.737	0	0	7	pSC.PGC.Mitotic.1_p.polyp
NvTSR-2 : NV2.2780	0	0	7	pSC.PGC.Mitotic.1_p.polyp
NvTSR-3 : NV2.3202	0.0071382	0.530504	7	pSC.PGC.Mitotic.1_p.polyp
NvTens : NV2.23274	0.0704491	5.57029	10	pSC.PGC.Mitotic.1_p.polyp
NvTSP-1 : NV2.23884	0.168464	9.54907	11	pSC.PGC.Mitotic.1_p.polyp
NvTSP-2 : NV2.23886	0.00542476	0.530504	6	pSC.PGC.Mitotic.1_p.polyp
NvThyrd : NV2.17626	0	0	7	pSC.PGC.Mitotic.1_p.polyp
NvThyr-1 : NV2.14419	0	0	7	pSC.PGC.Mitotic.1_p.polyp
NvThyr-2 : NV2.14040	0	0	7	pSC.PGC.Mitotic.1_p.polyp
NvThyr-3 : NV2.19319	0.438434	21.7507	7	pSC.PGC.Mitotic.1_p.polyp
NvTGFbIP-1 : NV2.3437	0.0154884	0.795756	8	pSC.PGC.Mitotic.1_p.polyp
NvTGFbIP-2 : NV2.2361	0.0136111	1.06101	6	pSC.PGC.Mitotic.1_p.polyp
NvUsh : NV2.20013	0.011232	1.32626	9	pSC.PGC.Mitotic.1_p.polyp
NvUsh-like : NV2.20014	0.102632	5.83554	12	pSC.PGC.Mitotic.1_p.polyp
NvvWFA-WAP : NV2.11346	0.0451969	1.32626	10	pSC.PGC.Mitotic.1_p.polyp
NvLamA2 : NV2.15818	0.0301187	1.06101	7	pSC.PGC.Mitotic.1_p.polyp
NvvWFAPA : NV2.3759	0.00645149	0.530504	7	pSC.PGC.Mitotic.1_p.polyp
NvvWFA-WSC : NV2.21576	0.00399235	0.265252	8	pSC.PGC.Mitotic.1_p.polyp
NvPolyvWFA : NV2.8635	0.00404101	0.265252	7	pSC.PGC.Mitotic.1_p.polyp
NvvWFA-TSR : NV2.14005	0	0	7	pSC.PGC.Mitotic.1_p.polyp
NvvWFA-10 : NV2.9760	0	0	7	pSC.PGC.Mitotic.1_p.polyp
NvvWFA-11 : NV2.9856	0.0462487	1.06101	8	pSC.PGC.Mitotic.1_p.polyp
NvvWFA-12 : NV2.10017	0.0129139	0.265252	8	pSC.PGC.Mitotic.1_p.polyp
NvvWFA-13 : NV2.10983	0.00214258	0.265252	7	pSC.PGC.Mitotic.1_p.polyp
NvvWFA-14 : NV2.11796	0.0187054	1.32626	6	pSC.PGC.Mitotic.1_p.polyp
NvvWFA-15 : NV2.14073	0	0	7	pSC.PGC.Mitotic.1_p.polyp
NvvWFA-16 : NV2.14625	0	0	7	pSC.PGC.Mitotic.1_p.polyp
NvvWFA-17 : NV2.19051	0.156173	9.54907	7	pSC.PGC.Mitotic.1_p.polyp
NvvWFA-18 : NV2.20167	0.001762	0.265252	6	pSC.PGC.Mitotic.1_p.polyp
NvvWFA-19 : NV2.20559	0.00423861	0.265252	7	pSC.PGC.Mitotic.1_p.polyp
NvvWFA-2 : NV2.10551	0	0	7	pSC.PGC.Mitotic.1_p.polyp
NvvWFA-20 : NV2.20560	0	0	7	pSC.PGC.Mitotic.1_p.polyp
NvvWFA-21 : NV2.21578	0.0109714	0.530504	7	pSC.PGC.Mitotic.1_p.polyp
NvvWFA-22 : NV2.24204	0	0	7	pSC.PGC.Mitotic.1_p.polyp
NvvWFA-23 : NV2.24227	0	0	7	pSC.PGC.Mitotic.1_p.polyp
NvvWFA-24 : NV2.24228	0.0140109	0.530504	7	pSC.PGC.Mitotic.1_p.polyp
NvvWFA-3 : NV2.14076	0.00397798	0.265252	11	pSC.PGC.Mitotic.1_p.polyp
NvvWFA-4 : NV2.14087	0	0	7	pSC.PGC.Mitotic.1_p.polyp
NvvWFA-5 : NV2.1044	0	0	7	pSC.PGC.Mitotic.1_p.polyp
NvvWFA-6 : NV2.1047	0	0	7	pSC.PGC.Mitotic.1_p.polyp
NvvWFA-7 : NV2.8413	0	0	7	pSC.PGC.Mitotic.1_p.polyp
NvvWFA-8 : NV2.8558	0.0669065	0.265252	7	pSC.PGC.Mitotic.1_p.polyp
NvvWFA-9 : NV2.8618	0	0	7	pSC.PGC.Mitotic.1_p.polyp
NvvWFA-EGF-Disc-1 : NV2.855	0.236897	12.2016	11	pSC.PGC.Mitotic.1_p.polyp
NvvWFA-EGF-Disc-2 : NV2.857	0.0309907	2.12202	11	pSC.PGC.Mitotic.1_p.polyp
NvvWFA-EGF-Disc-3 : NV2.861	0.0139275	0.530504	19	pSC.PGC.Mitotic.1_p.polyp
NvvWFD-1 : NV2.9287	0.0171688	1.32626	7	pSC.PGC.Mitotic.1_p.polyp
NvvWFD-2 : NV2.21786	0	0	7	pSC.PGC.Mitotic.1_p.polyp
NvHspg : NV2.14905	0	0	7	pSC.PGC.Mitotic.1_p.polyp
NvBcan-like : NV2.12169	0	0	7	pSC.PGC.Mitotic.1_p.polyp
NvCspd-like : NV2.11760	0.00228076	0.265252	7	pSC.PGC.Mitotic.1_p.polyp
NvLecc-like-1 : NV2.22624	0	0	7	pSC.PGC.Mitotic.1_p.polyp
NvLecc-like-2 : NV2.22626	0	0	7	pSC.PGC.Mitotic.1_p.polyp
NvPlc : NV2.14907	0.00268094	0.265252	7	pSC.PGC.Mitotic.1_p.polyp
NvPlc-like : NV2.14904	0	0	7	pSC.PGC.Mitotic.1_p.polyp
NvPG-like : NV2.22783	0.0427361	3.18302	7	pSC.PGC.Mitotic.1_p.polyp
NvVers : NV2.25674	0	0	7	pSC.PGC.Mitotic.1_p.polyp
NvADAM-1 : NV2.24729	0.590346	29.9735	16	pSC.PGC.Mitotic.1_p.polyp
NvADAM-2 : NV2.6771	0.135537	9.01857	13	pSC.PGC.Mitotic.1_p.polyp
NvADAM-3 : NV2.13893	0.425842	22.8117	9	pSC.PGC.Mitotic.1_p.polyp
NvADAM-4 : NV2.18385	0.0599028	2.12202	7	pSC.PGC.Mitotic.1_p.polyp
NvADAM-like : NV2.20818	0	0	7	pSC.PGC.Mitotic.1_p.polyp
NvADAMTS-1 : NV2.22459	0.00156233	0.265252	7	pSC.PGC.Mitotic.1_p.polyp
NvADAMTS-10 : NV2.21229	0	0	7	pSC.PGC.Mitotic.1_p.polyp
NvADAMTS-11 : NV2.21230	0	0	7	pSC.PGC.Mitotic.1_p.polyp
NvADAMTS-12 : NV2.21636	0.0135831	0.530504	7	pSC.PGC.Mitotic.1_p.polyp
NvADAMTS-13 : NV2.21638	0.00259035	0.265252	7	pSC.PGC.Mitotic.1_p.polyp
NvADAMTS-14 : NV2.22465	0	0	7	pSC.PGC.Mitotic.1_p.polyp
NvADAMTS-15 : NV2.25184	0	0	7	pSC.PGC.Mitotic.1_p.polyp
NvADAMTS-2 : NV2.17494	0	0	7	pSC.PGC.Mitotic.1_p.polyp
NvADAMTS-3 : NV2.24253	0.00270224	0.265252	7	pSC.PGC.Mitotic.1_p.polyp
NvADAMTS-4 : NV2.9914	0.0111382	0.795756	7	pSC.PGC.Mitotic.1_p.polyp
NvADAMTS-5 : NV2.1123	0.0619848	3.97878	8	pSC.PGC.Mitotic.1_p.polyp
NvADAMTS-6 : NV2.1120	0.073364	4.50928	8	pSC.PGC.Mitotic.1_p.polyp
NvADAMTS-7 : NV2.88	0.00801868	0.530504	8	pSC.PGC.Mitotic.1_p.polyp
NvADAMTS-8 : NV2.1124	0.0624208	3.71353	8	pSC.PGC.Mitotic.1_p.polyp
NvADAMTS-9 : NV2.17536	0.00312282	0.265252	7	pSC.PGC.Mitotic.1_p.polyp
NvADAMTS13-related : NV2.18541	0	0	7	pSC.PGC.Mitotic.1_p.polyp
NvADAMTS-17 : NV2.23275	0	0	7	pSC.PGC.Mitotic.1_p.polyp
NvADAMTS-18 : NV2.20821	0.0142404	1.06101	7	pSC.PGC.Mitotic.1_p.polyp
NvADAMTS-19 : NV2.87	0.00607662	0.530504	7	pSC.PGC.Mitotic.1_p.polyp
NvADAMTS-20 : NV2.22999	0.276331	15.9151	11	pSC.PGC.Mitotic.1_p.polyp
NvADAMTS-21 : NV2.24070	0	0	6	pSC.PGC.Mitotic.1_p.polyp
NvNaglu : NV2.4033	0.0104187	0.530504	8	pSC.PGC.Mitotic.1_p.polyp
NvAstacin-10 : NV2.23064	0.0248895	1.85676	8	pSC.PGC.Mitotic.1_p.polyp
NvAstacin-11 : NV2.4041	0.157988	8.22281	9	pSC.PGC.Mitotic.1_p.polyp
NvAstacin-12 : NV2.21687	0.00504857	0.265252	8	pSC.PGC.Mitotic.1_p.polyp
NvAstacin-13 : NV2.18310	0.0254355	1.06101	7	pSC.PGC.Mitotic.1_p.polyp
NvAstacin-14 : NV2.18077	0	0	7	pSC.PGC.Mitotic.1_p.polyp
NvAstacin-15 : NV2.3279	0.0224497	1.32626	7	pSC.PGC.Mitotic.1_p.polyp
NvAstacin-16 : NV2.3953	0.0201953	1.06101	7	pSC.PGC.Mitotic.1_p.polyp
NvAstacin-17 : NV2.5152	0	0	6	pSC.PGC.Mitotic.1_p.polyp
NvAstacin-18 : NV2.8552	0.0485752	3.71353	8	pSC.PGC.Mitotic.1_p.polyp
NvAstacin-19 : NV2.10155	0	0	7	pSC.PGC.Mitotic.1_p.polyp
NvAstacin-1 : NV2.16729	0	0	7	pSC.PGC.Mitotic.1_p.polyp
NvAstacin-2 : NV2.24546	1.98619	49.0716	16	pSC.PGC.Mitotic.1_p.polyp
NvAstacin-20 : NV2.11168	0.0112722	0.530504	10	pSC.PGC.Mitotic.1_p.polyp
NvAstacin-21 : NV2.11169	0	0	7	pSC.PGC.Mitotic.1_p.polyp
NvAstacin-22 : NV2.11270	0	0	7	pSC.PGC.Mitotic.1_p.polyp
NvAstacin-23 : NV2.13964	0.0603603	1.85676	7	pSC.PGC.Mitotic.1_p.polyp
NvAstacin-24 : NV2.14830	0.0187724	1.32626	9	pSC.PGC.Mitotic.1_p.polyp
NvAstacin-25 : NV2.15018	0.00132242	0.265252	7	pSC.PGC.Mitotic.1_p.polyp
NvAstacin-26 : NV2.17332	0.0241756	1.06101	7	pSC.PGC.Mitotic.1_p.polyp
NvAstacin-27 : NV2.17973	0.0025658	0.265252	7	pSC.PGC.Mitotic.1_p.polyp
NvAstacin-28 : NV2.18104	0.0810577	2.38727	7	pSC.PGC.Mitotic.1_p.polyp
NvAstacin-29 : NV2.21385	0.00215827	0.265252	7	pSC.PGC.Mitotic.1_p.polyp
NvAstacin-3 : NV2.10250	0.0069251	0.530504	7	pSC.PGC.Mitotic.1_p.polyp
NvAstacin-4 : NV2.13745	0	0	7	pSC.PGC.Mitotic.1_p.polyp
NvAstacin-5 : NV2.2486	0	0	7	pSC.PGC.Mitotic.1_p.polyp
NvAstacin-6 : NV2.15011	0	0	7	pSC.PGC.Mitotic.1_p.polyp
NvAstacin-7 : NV2.19110	0	0	7	pSC.PGC.Mitotic.1_p.polyp
NvAstacin-8 : NV2.5141	0.0300682	1.85676	7	pSC.PGC.Mitotic.1_p.polyp
NvAstacin-9 : NV2.2433	0.0165523	0.795756	6	pSC.PGC.Mitotic.1_p.polyp
NvAstacin-like-1 : NV2.14828	0.0084125	0.530504	6	pSC.PGC.Mitotic.1_p.polyp
NvAstacin-like-2 : NV2.8027	0.00575884	0.265252	7	pSC.PGC.Mitotic.1_p.polyp
NvBMP/Toll-1 : NV2.25693	0.0919378	6.6313	10	pSC.PGC.Mitotic.1_p.polyp
NvBMP/Toll-2 : NV2.25692	0.0406612	2.65252	9	pSC.PGC.Mitotic.1_p.polyp
NvCoag-like 1 : NV2.19953	0	0	7	pSC.PGC.Mitotic.1_p.polyp
NvCoag-like 2 : NV2.1113	0	0	7	pSC.PGC.Mitotic.1_p.polyp
NvCoag-like 3 : NV2.19396	0	0	7	pSC.PGC.Mitotic.1_p.polyp
NvCoag-like 4 : NV2.1635	0	0	7	pSC.PGC.Mitotic.1_p.polyp
NvCoag-like 5 : NV2.3648	0	0	7	pSC.PGC.Mitotic.1_p.polyp
NvCoag-like 6 : NV2.19400	0	0	7	pSC.PGC.Mitotic.1_p.polyp
NvCoag-related 1 : NV2.14492	0.00790645	0.795756	10	pSC.PGC.Mitotic.1_p.polyp
NvCoag-related 2 : NV2.581	0.0139987	0.795756	8	pSC.PGC.Mitotic.1_p.polyp
NvCoag-related 3 : NV2.593	0	0	7	pSC.PGC.Mitotic.1_p.polyp
NvCoag-related 4 : NV2.1284	0	0	7	pSC.PGC.Mitotic.1_p.polyp
NvCystat-1 : NV2.8996	0.895059	40.8488	9	pSC.PGC.Mitotic.1_p.polyp
NvCystat-2 : NV2.12344	0.268489	12.4668	6	pSC.PGC.Mitotic.1_p.polyp
NvCystat-3 : NV2.17628	1.05339	46.9496	7	pSC.PGC.Mitotic.1_p.polyp
NvCRELD2 : NV2.1170	0.148686	9.28382	6	pSC.PGC.Mitotic.1_p.polyp
NvHspe-1 : NV2.17717	0.0541857	3.97878	10	pSC.PGC.Mitotic.1_p.polyp
NvHspe-2 : NV2.18651	0.0133558	1.06101	7	pSC.PGC.Mitotic.1_p.polyp
NvHyal-1 : NV2.14428	0	0	6	pSC.PGC.Mitotic.1_p.polyp
NvHyal-2 : NV2.14444	0.0452749	3.18302	10	pSC.PGC.Mitotic.1_p.polyp
NvIGFKz : NV2.6476	0	0	6	pSC.PGC.Mitotic.1_p.polyp
NvItih : NV2.22463	0.0893881	5.57029	6	pSC.PGC.Mitotic.1_p.polyp
NvItih-hC : NV2.15230	0.00627073	0.265252	6	pSC.PGC.Mitotic.1_p.polyp
NvKSI : NV2.14070	0	0	7	pSC.PGC.Mitotic.1_p.polyp
NvKusi-1 : NV2.10172	0.0648777	3.44828	6	pSC.PGC.Mitotic.1_p.polyp
NvKusi-2 : NV2.320	0.00324984	0.265252	6	pSC.PGC.Mitotic.1_p.polyp
NvKusi-3 : NV2.3373	0.143197	8.75332	5	pSC.PGC.Mitotic.1_p.polyp
NvKusi-4 : NV2.21204	0.00863144	0.530504	7	pSC.PGC.Mitotic.1_p.polyp
NvLDTFM : NV2.20815	0.00537818	0.265252	6	pSC.PGC.Mitotic.1_p.polyp
NvLox : NV2.19165	0.0147286	0.795756	7	pSC.PGC.Mitotic.1_p.polyp
NvLox2-like : NV2.19166	0.012931	0.795756	6	pSC.PGC.Mitotic.1_p.polyp
NvM28MMP : NV2.13120	0.332734	21.2202	11	pSC.PGC.Mitotic.1_p.polyp
NvMASP : NV2.3735	0.0043495	0.530504	7	pSC.PGC.Mitotic.1_p.polyp
NvMMP-2 : NV2.20474	0.155778	5.83554	6	pSC.PGC.Mitotic.1_p.polyp
NvMMP-3 : NV2.807	0.033457	1.59151	7	pSC.PGC.Mitotic.1_p.polyp
NvMMP-4 : NV2.10833	0	0	7	pSC.PGC.Mitotic.1_p.polyp
NvMMP-5 : NV2.14297	0	0	7	pSC.PGC.Mitotic.1_p.polyp
NvMMP-6 : NV2.1647	0	0	7	pSC.PGC.Mitotic.1_p.polyp
NvMMP-7 : NV2.3582	0	0	8	pSC.PGC.Mitotic.1_p.polyp
NvMMP-8 : NV2.14820	0.00206873	0.265252	8	pSC.PGC.Mitotic.1_p.polyp
NvMMP-9 : NV2.16880	0.00282664	0.265252	6	pSC.PGC.Mitotic.1_p.polyp
NvMMP-1 : NV2.8375	0.0381555	1.59151	7	pSC.PGC.Mitotic.1_p.polyp
NvMMP-10 : NV2.19146	0	0	6	pSC.PGC.Mitotic.1_p.polyp
NvMMP-11 : NV2.19316	0.0545378	1.06101	7	pSC.PGC.Mitotic.1_p.polyp
NvMMP-12 : NV2.20475	1.01596	19.6286	7	pSC.PGC.Mitotic.1_p.polyp
NvMep-1 : NV2.25961	0.0129919	0.530504	8	pSC.PGC.Mitotic.1_p.polyp
NvMep-10 : NV2.5698	0.521382	22.5464	20	pSC.PGC.Mitotic.1_p.polyp
NvMep-11 : NV2.8948	0	0	7	pSC.PGC.Mitotic.1_p.polyp
NvMep-12 : NV2.13368	0.0129203	0.795756	7	pSC.PGC.Mitotic.1_p.polyp
NvMep-13 : NV2.14862	0	0	7	pSC.PGC.Mitotic.1_p.polyp
NvMep-14 : NV2.15924	0	0	7	pSC.PGC.Mitotic.1_p.polyp
NvMep-15 : NV2.15925	0	0	7	pSC.PGC.Mitotic.1_p.polyp
NvMep-16 : NV2.16035	0	0	7	pSC.PGC.Mitotic.1_p.polyp
NvMep-17 : NV2.16036	0	0	7	pSC.PGC.Mitotic.1_p.polyp
NvMep-18 : NV2.23644	0.0071651	0.265252	7	pSC.PGC.Mitotic.1_p.polyp
NvMep-2 : NV2.16572	0.125506	5.30504	7	pSC.PGC.Mitotic.1_p.polyp
NvMep-3 : NV2.20641	0.0289509	1.32626	9	pSC.PGC.Mitotic.1_p.polyp
NvMep-4 : NV2.16574	0	0	8	pSC.PGC.Mitotic.1_p.polyp
NvMep-5 : NV2.17022	0	0	7	pSC.PGC.Mitotic.1_p.polyp
NvMep-6 : NV2.16080	0	0	7	pSC.PGC.Mitotic.1_p.polyp
NvMep-7 : NV2.16077	0	0	7	pSC.PGC.Mitotic.1_p.polyp
NvMep-8 : NV2.17021	0.0102132	0.795756	7	pSC.PGC.Mitotic.1_p.polyp
NvMep-9 : NV2.6019	0	0	7	pSC.PGC.Mitotic.1_p.polyp
NvPappa : NV2.25632	0	0	7	pSC.PGC.Mitotic.1_p.polyp
NvPLG : NV2.7036	0	0	7	pSC.PGC.Mitotic.1_p.polyp
NvGGGtfK : NV2.9869	0.0129137	0.795756	17	pSC.PGC.Mitotic.1_p.polyp
NvSerpin-1 : NV2.3266	0.0107043	0.265252	7	pSC.PGC.Mitotic.1_p.polyp
NvSerpin-2 : NV2.21103	0.0961836	5.83554	5	pSC.PGC.Mitotic.1_p.polyp
NvSVMP-like-1 : NV2.14357	0	0	6	pSC.PGC.Mitotic.1_p.polyp
NvSVMP-like-2 : NV2.14356	0	0	6	pSC.PGC.Mitotic.1_p.polyp
NvTIMP-1 : NV2.3671	0	0	7	pSC.PGC.Mitotic.1_p.polyp
NvTIMP-2 : NV2.3669	0	0	7	pSC.PGC.Mitotic.1_p.polyp
NvTIMP-3 : NV2.17964	0.0537186	2.91777	6	pSC.PGC.Mitotic.1_p.polyp
NvTIMP-4 : NV2.2779	0.00671524	0.265252	7	pSC.PGC.Mitotic.1_p.polyp
NvToll : NV2.3100	0.00749283	0.530504	6	pSC.PGC.Mitotic.1_p.polyp
NvToll-like : NV2.21954	0	0	6	pSC.PGC.Mitotic.1_p.polyp
NvTryI-like : NV2.3632	0.0211398	1.06101	6	pSC.PGC.Mitotic.1_p.polyp
NvTyr : NV2.12418	0	0	7	pSC.PGC.Mitotic.1_p.polyp
NvvWFAIg : NV2.21577	0.00248177	0.265252	7	pSC.PGC.Mitotic.1_p.polyp
NvvWFAKz-1 : NV2.14043	0	0	6	pSC.PGC.Mitotic.1_p.polyp
NvnWFAGonKz : NV2.14092	0	0	7	pSC.PGC.Mitotic.1_p.polyp
NvAnnexin-1 : NV2.19402	0.301616	12.9973	8	pSC.PGC.Mitotic.1_p.polyp
NvAnnexin-2 : NV2.9562	0.377336	21.4854	10	pSC.PGC.Mitotic.1_p.polyp
NvAnnexin-3 : NV2.10289	0.128442	8.22281	9	pSC.PGC.Mitotic.1_p.polyp
NvAnnexin-4 : NV2.19403	0.033331	1.59151	8	pSC.PGC.Mitotic.1_p.polyp
NvAnnexin-5 : NV2.19404	0.037094	2.12202	8	pSC.PGC.Mitotic.1_p.polyp
NvAnos1 : NV2.6365	0.0764256	6.89655	9	pSC.PGC.Mitotic.1_p.polyp
NvCreact : NV2.11374	0	0	7	pSC.PGC.Mitotic.1_p.polyp
NvCTLDvWFA-1 : NV2.20956	0	0	7	pSC.PGC.Mitotic.1_p.polyp
NvCTLDvWFA-2 : NV2.20522	0.0019875	0.265252	7	pSC.PGC.Mitotic.1_p.polyp
NvCTLDvWFA-3 : NV2.20957	0	0	7	pSC.PGC.Mitotic.1_p.polyp
NvCTLD-1 : NV2.7430	0	0	7	pSC.PGC.Mitotic.1_p.polyp
NvCTLD-2 : NV2.18171	0	0	7	pSC.PGC.Mitotic.1_p.polyp
NvCTLD-3 : NV2.1101	0	0	7	pSC.PGC.Mitotic.1_p.polyp
NvCTLD-4 : NV2.5627	0.00152479	0.265252	7	pSC.PGC.Mitotic.1_p.polyp
NvCTLD-5 : NV2.5851	0	0	7	pSC.PGC.Mitotic.1_p.polyp
NvCTLD-6 : NV2.8276	0.00163152	0.265252	7	pSC.PGC.Mitotic.1_p.polyp
NvCTLD-7 : NV2.8278	0.107055	6.1008	10	pSC.PGC.Mitotic.1_p.polyp
NvCTLD-8 : NV2.18585	0.00519104	0.530504	7	pSC.PGC.Mitotic.1_p.polyp
NvCUB-Ig : NV2.10732	0.00189845	0.265252	5	pSC.PGC.Mitotic.1_p.polyp
NvCUB-TSP : NV2.3253	0.0933231	5.03979	8	pSC.PGC.Mitotic.1_p.polyp
NvCUB-ZP-1 : NV2.21283	0.644583	32.626	20	pSC.PGC.Mitotic.1_p.polyp
NvCUB-ZP-2 : NV2.21285	0.00789911	0.265252	7	pSC.PGC.Mitotic.1_p.polyp
NvCUB-misc-1 : NV2.17853	0	0	7	pSC.PGC.Mitotic.1_p.polyp
NvCUB-misc-5 : NV2.3067	0.360397	20.4244	7	pSC.PGC.Mitotic.1_p.polyp
NvNgalectin-like : NV2.4511	0.0304624	1.85676	7	pSC.PGC.Mitotic.1_p.polyp
NvNgalectin-2 : NV2.5188	0.00879467	0.530504	7	pSC.PGC.Mitotic.1_p.polyp
NvNgalectin-3 : NV2.5196	0	0	7	pSC.PGC.Mitotic.1_p.polyp
NvNgalectin-1 : NV2.5200	0.133215	7.69231	7	pSC.PGC.Mitotic.1_p.polyp
NvCollectin : NV2.23165	0.0166453	0.795756	8	pSC.PGC.Mitotic.1_p.polyp
NvComplC : NV2.11502	0	0	7	pSC.PGC.Mitotic.1_p.polyp
NvNADPH1-1 : NV2.27	0.00429071	0.265252	7	pSC.PGC.Mitotic.1_p.polyp
NvNADPH1-2 : NV2.21	0.2388	13.7931	12	pSC.PGC.Mitotic.1_p.polyp
NvFras : NV2.19212	0.0245255	0.530504	7	pSC.PGC.Mitotic.1_p.polyp
NvHLecAg : NV2.5939	0	0	7	pSC.PGC.Mitotic.1_p.polyp
NvIntL-like-1 : NV2.7079	0	0	7	pSC.PGC.Mitotic.1_p.polyp
NvIntL-like-2 : NV2.22909	0.00469581	0.530504	8	pSC.PGC.Mitotic.1_p.polyp
NvMAMCTLD-1 : NV2.23818	0	0	7	pSC.PGC.Mitotic.1_p.polyp
NvMAMCTLD-2 : NV2.23715	0	0	7	pSC.PGC.Mitotic.1_p.polyp
NvManR : NV2.19044	0.00770186	0.265252	7	pSC.PGC.Mitotic.1_p.polyp
NvMuc4-1 : NV2.16270	0.35995	19.6286	16	pSC.PGC.Mitotic.1_p.polyp
NvMuc4-2 : NV2.16273	1.05725	35.809	20	pSC.PGC.Mitotic.1_p.polyp
NvMuc-like-1 : NV2.12620	0.00545786	0.265252	8	pSC.PGC.Mitotic.1_p.polyp
NvMuc-like-10 : NV2.17784	0	0	7	pSC.PGC.Mitotic.1_p.polyp
NvMuc-like-11 : NV2.19027	0	0	7	pSC.PGC.Mitotic.1_p.polyp
NvMuc-like-2 : NV2.24863	0	0	7	pSC.PGC.Mitotic.1_p.polyp
NvMuc-like-3 : NV2.1129	0	0	7	pSC.PGC.Mitotic.1_p.polyp
NvMuc-like-4 : NV2.2216	0	0	7	pSC.PGC.Mitotic.1_p.polyp
NvMuc-like-5 : NV2.6919	0.135425	6.36605	14	pSC.PGC.Mitotic.1_p.polyp
NvMuc-like-6 : NV2.12174	0.0784196	4.24403	9	pSC.PGC.Mitotic.1_p.polyp
NvMuc-like-7 : NV2.12741	0	0	7	pSC.PGC.Mitotic.1_p.polyp
NvMuc-like-8 : NV2.12902	0.0343686	1.32626	7	pSC.PGC.Mitotic.1_p.polyp
NvMuc-like-9 : NV2.16210	0	0	7	pSC.PGC.Mitotic.1_p.polyp
NvNOWA-1 : NV2.15872	0.0203971	1.06101	7	pSC.PGC.Mitotic.1_p.polyp
NvNOWA-2 : NV2.10392	0	0	7	pSC.PGC.Mitotic.1_p.polyp
NvNOWA-3 : NV2.10388	0.0558625	2.91777	7	pSC.PGC.Mitotic.1_p.polyp
NvNOWA-4 : NV2.10390	0.0105992	0.530504	8	pSC.PGC.Mitotic.1_p.polyp
NvNOWA-related : NV2.10391	0	0	7	pSC.PGC.Mitotic.1_p.polyp
NvNat-like : NV2.5928	0.00377529	0.265252	7	pSC.PGC.Mitotic.1_p.polyp
NvPAN-App-EGF-1 : NV2.5576	0.00359519	0.530504	7	pSC.PGC.Mitotic.1_p.polyp
NvPAN-App-EGF-2 : NV2.20124	0.00664459	0.265252	7	pSC.PGC.Mitotic.1_p.polyp
NvPALec-1 : NV2.18114	0.0135004	0.530504	8	pSC.PGC.Mitotic.1_p.polyp
NvMesh : NV2.16433	0	0	7	pSC.PGC.Mitotic.1_p.polyp
NvSEA-WSC-1 : NV2.13381	0.0178197	1.32626	7	pSC.PGC.Mitotic.1_p.polyp
NvSEA-WSC-2 : NV2.15283	0.105446	2.12202	7	pSC.PGC.Mitotic.1_p.polyp
NvSEAR : NV2.14509	0.0834975	3.97878	13	pSC.PGC.Mitotic.1_p.polyp
NvSel-related-1 : NV2.3407	0	0	7	pSC.PGC.Mitotic.1_p.polyp
NvSel-related-2 : NV2.17145	0.00215827	0.265252	7	pSC.PGC.Mitotic.1_p.polyp
NvSEMA5B : NV2.11758	0.0942713	6.6313	10	pSC.PGC.Mitotic.1_p.polyp
NvSEMA-like-1 : NV2.7220	0.00756863	0.530504	6	pSC.PGC.Mitotic.1_p.polyp
NvSEMA-like-2 : NV2.22863	0.138036	7.69231	10	pSC.PGC.Mitotic.1_p.polyp
NvSnaclec-like-2 : NV2.22444	0.00349264	0.530504	7	pSC.PGC.Mitotic.1_p.polyp
NvSnaclec-like-3 : NV2.13847	0	0	7	pSC.PGC.Mitotic.1_p.polyp
NvSnaclec-like-4 : NV2.14543	0.0279337	1.06101	7	pSC.PGC.Mitotic.1_p.polyp
NvSynd : NV2.6659	1.5216	58.0902	6	pSC.PGC.Mitotic.1_p.polyp
NvvWFAConA-1 : NV2.16335	0.0176622	1.06101	8	pSC.PGC.Mitotic.1_p.polyp
NvvWFAConA-2 : NV2.16336	0	0	7	pSC.PGC.Mitotic.1_p.polyp
NvvWFAConA-3 : NV2.16343	0.0336073	2.12202	10	pSC.PGC.Mitotic.1_p.polyp
NvvWFAConA-4 : NV2.16338	0.111173	6.36605	11	pSC.PGC.Mitotic.1_p.polyp
NvAdmp-1 : NV2.2978	0.231954	13.5279	11	pSC.PGC.Mitotic.1_p.polyp
NvBMP2 : NV2.19847	0.00725895	0.530504	7	pSC.PGC.Mitotic.1_p.polyp
NvBMP7 : NV2.6269	0.0263927	1.85676	7	pSC.PGC.Mitotic.1_p.polyp
NvCUB-misc-2 : NV2.14699	0.0130314	0.795756	7	pSC.PGC.Mitotic.1_p.polyp
NvCUB-misc-3 : NV2.3898	0.0441081	2.12202	8	pSC.PGC.Mitotic.1_p.polyp
NvCUB-misc-4 : NV2.2661	0.0673892	4.50928	9	pSC.PGC.Mitotic.1_p.polyp
NvChrd : NV2.14185	0.0192453	1.85676	8	pSC.PGC.Mitotic.1_p.polyp
NvChrd-like : NV2.22735	0.00346644	0.265252	8	pSC.PGC.Mitotic.1_p.polyp
NvDllR-1 : NV2.5910	0.00510689	0.265252	7	pSC.PGC.Mitotic.1_p.polyp
NvDllR-2 : NV2.22236	0.0745107	6.1008	7	pSC.PGC.Mitotic.1_p.polyp
NvDll-like 1 : NV2.20618	0.256126	14.0584	14	pSC.PGC.Mitotic.1_p.polyp
NvDll-like 2 : NV2.20616	0.175465	12.2016	7	pSC.PGC.Mitotic.1_p.polyp
NvDhhA : NV2.128	0.0129405	0.795756	7	pSC.PGC.Mitotic.1_p.polyp
NvEGF-Ig : NV2.16522	0	0	7	pSC.PGC.Mitotic.1_p.polyp
NvPolyEGF-1 : NV2.14162	0	0	7	pSC.PGC.Mitotic.1_p.polyp
NvPolyEGF-2 : NV2.25193	0.0118628	0.265252	10	pSC.PGC.Mitotic.1_p.polyp
NvEda-like-1 : NV2.22707	0.350918	19.3634	19	pSC.PGC.Mitotic.1_p.polyp
NvEda-like-2 : NV2.22131	0	0	7	pSC.PGC.Mitotic.1_p.polyp
NvEda-like-3 : NV2.22054	0.211059	12.7321	8	pSC.PGC.Mitotic.1_p.polyp
NvEda-like-4 : NV2.22056	0.0606677	4.50928	17	pSC.PGC.Mitotic.1_p.polyp
NvEda-like-5 : NV2.22058	0	0	7	pSC.PGC.Mitotic.1_p.polyp
NvEGF-like : NV2.25171	0.0749979	5.03979	7	pSC.PGC.Mitotic.1_p.polyp
NvFREP-1 : NV2.1244	0	0	7	pSC.PGC.Mitotic.1_p.polyp
NvFREP-10 : NV2.19426	0	0	8	pSC.PGC.Mitotic.1_p.polyp
NvFREP-11 : NV2.22115	0.00595269	0.265252	8	pSC.PGC.Mitotic.1_p.polyp
NvFREP-12 : NV2.24719	0	0	7	pSC.PGC.Mitotic.1_p.polyp
NvFREP-13 : NV2.7282	0.00501801	0.265252	7	pSC.PGC.Mitotic.1_p.polyp
NvFREP-14 : NV2.25466	0	0	7	pSC.PGC.Mitotic.1_p.polyp
NvFREP-15 : NV2.22910	0	0	7	pSC.PGC.Mitotic.1_p.polyp
NvFREP-16 : NV2.566	0	0	7	pSC.PGC.Mitotic.1_p.polyp
NvFREP-17 : NV2.2132	0	0	7	pSC.PGC.Mitotic.1_p.polyp
NvFREP-18 : NV2.2698	0	0	7	pSC.PGC.Mitotic.1_p.polyp
NvFREP-19 : NV2.4753	0	0	7	pSC.PGC.Mitotic.1_p.polyp
NvFREP-2 : NV2.1985	0	0	7	pSC.PGC.Mitotic.1_p.polyp
NvFREP-20 : NV2.5688	0	0	7	pSC.PGC.Mitotic.1_p.polyp
NvFREP-21 : NV2.6010	0	0	7	pSC.PGC.Mitotic.1_p.polyp
NvFREP-22 : NV2.7679	0	0	7	pSC.PGC.Mitotic.1_p.polyp
NvFREP-23 : NV2.9815	0	0	7	pSC.PGC.Mitotic.1_p.polyp
NvFREP-24 : NV2.11287	0	0	7	pSC.PGC.Mitotic.1_p.polyp
NvFREP-25 : NV2.12036	0	0	7	pSC.PGC.Mitotic.1_p.polyp
NvFREP-26 : NV2.13457	0	0	7	pSC.PGC.Mitotic.1_p.polyp
NvFREP-27 : NV2.22610	0	0	7	pSC.PGC.Mitotic.1_p.polyp
NvFREP-28 : NV2.25688	0	0	7	pSC.PGC.Mitotic.1_p.polyp
NvFREP-29 : NV2.11749	0.00524421	0.265252	7	pSC.PGC.Mitotic.1_p.polyp
NvFREP-3 : NV2.6245	0	0	7	pSC.PGC.Mitotic.1_p.polyp
NvFREPd-4 : NV2.24006	0	0	7	pSC.PGC.Mitotic.1_p.polyp
NvFREP-5 : NV2.17198	0	0	7	pSC.PGC.Mitotic.1_p.polyp
NvFREP-6 : NV2.24867	0	0	7	pSC.PGC.Mitotic.1_p.polyp
NvFREP-7 : NV2.14110	0	0	6	pSC.PGC.Mitotic.1_p.polyp
NvFREP-8 : NV2.24484	0.0142041	1.32626	8	pSC.PGC.Mitotic.1_p.polyp
NvFREP-9 : NV2.10046	0	0	7	pSC.PGC.Mitotic.1_p.polyp
NvFst : NV2.23832	0.0260903	1.32626	7	pSC.PGC.Mitotic.1_p.polyp
NvFst-like 1 : NV2.13423	0.00861187	0.530504	6	pSC.PGC.Mitotic.1_p.polyp
NvFst-like 2 : NV2.23229	0.0832384	3.71353	6	pSC.PGC.Mitotic.1_p.polyp
NvFst-like 3 : NV2.23230	0.345199	13.5279	6	pSC.PGC.Mitotic.1_p.polyp
NvGDF : NV2.6489	0.0464288	3.44828	7	pSC.PGC.Mitotic.1_p.polyp
NvHH1 : NV2.10760	0.00255689	0.265252	6	pSC.PGC.Mitotic.1_p.polyp
NvIhh : NV2.23188	0.0305719	1.59151	7	pSC.PGC.Mitotic.1_p.polyp
NvInbb : NV2.173	0	0	7	pSC.PGC.Mitotic.1_p.polyp
NvJag : NV2.19817	0.046547	2.12202	7	pSC.PGC.Mitotic.1_p.polyp
NvKcp-like-1 : NV2.3424	0	0	7	pSC.PGC.Mitotic.1_p.polyp
NvKcp-like-2 : NV2.12484	0.00159311	0.265252	7	pSC.PGC.Mitotic.1_p.polyp
NvKcp-like-3 : NV2.12730	0.0716686	3.44828	13	pSC.PGC.Mitotic.1_p.polyp
NvLTBP : NV2.20944	0	0	7	pSC.PGC.Mitotic.1_p.polyp
NvPolyEGF-3 : NV2.13872	0.0118628	0.265252	7	pSC.PGC.Mitotic.1_p.polyp
NvPolyEGF-4 : NV2.14163	0.0251526	1.06101	8	pSC.PGC.Mitotic.1_p.polyp
NvPolyEGF-21 : NV2.21926	0.13795	7.95756	9	pSC.PGC.Mitotic.1_p.polyp
NvPALec-2 : NV2.21307	0	0	7	pSC.PGC.Mitotic.1_p.polyp
NvPALec-3 : NV2.21375	0	0	7	pSC.PGC.Mitotic.1_p.polyp
NvPAN-1 : NV2.6411	0.00950043	0.265252	8	pSC.PGC.Mitotic.1_p.polyp
NvPAN-2 : NV2.7825	0	0	7	pSC.PGC.Mitotic.1_p.polyp
NvPAN-3 : NV2.8000	0	0	7	pSC.PGC.Mitotic.1_p.polyp
NvSFRP : NV2.14654	0.119373	4.24403	8	pSC.PGC.Mitotic.1_p.polyp
NvSOM-TSP : NV2.16600	0.031052	1.85676	7	pSC.PGC.Mitotic.1_p.polyp
NvTNF : NV2.22057	0.00704403	0.530504	6	pSC.PGC.Mitotic.1_p.polyp
NvVEGF : NV2.2923	0.0566245	3.97878	8	pSC.PGC.Mitotic.1_p.polyp
NvVgt-1 : NV2.914	0.158668	4.50928	6	pSC.PGC.Mitotic.1_p.polyp
NvVgt-2 : NV2.1922	0.00202978	0.265252	7	pSC.PGC.Mitotic.1_p.polyp
NvVgt-like : NV2.74	0	0	6	pSC.PGC.Mitotic.1_p.polyp
NvWnt1 : NV2.12225	0.0698073	0.795756	8	pSC.PGC.Mitotic.1_p.polyp
NvWnt10a : NV2.11032	0	0	7	pSC.PGC.Mitotic.1_p.polyp
NvWnt11 : NV2.22664	0.1056	6.89655	9	pSC.PGC.Mitotic.1_p.polyp
NvWnt16 : NV2.2707	0	0	6	pSC.PGC.Mitotic.1_p.polyp
NvWnt2b : NV2.3168	1.00077	32.626	20	pSC.PGC.Mitotic.1_p.polyp
NvWnt3a : NV2.12463	0.00723672	0.530504	7	pSC.PGC.Mitotic.1_p.polyp
NvWint5a : NV2.3611	0.00732879	0.795756	6	pSC.PGC.Mitotic.1_p.polyp
NvWnt6 : NV2.11033	0.0219784	2.12202	9	pSC.PGC.Mitotic.1_p.polyp
NvWnt7b-3 : NV2.23407	0.0286193	2.12202	8	pSC.PGC.Mitotic.1_p.polyp
NvWnt7b-1 : NV2.3609	0.0215015	1.59151	7	pSC.PGC.Mitotic.1_p.polyp
NvWnt8a : NV2.4522	0	0	7	pSC.PGC.Mitotic.1_p.polyp
NvWnt8a-like : NV2.3689	0.00667679	0.795756	7	pSC.PGC.Mitotic.1_p.polyp
NvWnt8b-2 : NV2.5661	0.0134008	0.795756	7	pSC.PGC.Mitotic.1_p.polyp
NvvWFC : NV2.12328	0	0	7	pSC.PGC.Mitotic.1_p.polyp
NvGTF2 : NV2.14946	0.0136014	1.06101	10	pSC.PGC.Mitotic.1_p.polyp
NvPFnt : NV2.24348	0.00487237	0.265252	7	pSC.PGC.Mitotic.1_p.polyp
NvPtprq-1 : NV2.600	0	0	6	pSC.PGC.Mitotic.1_p.polyp
NvPtprq-2 : NV2.599	0.00407212	0.530504	7	pSC.PGC.Mitotic.1_p.polyp
NvPtprq-3 : NV2.12753	0	0	7	pSC.PGC.Mitotic.1_p.polyp
NvPtprq-4 : NV2.13521	0	0	7	pSC.PGC.Mitotic.1_p.polyp
NvAeGly-1 : NV2.23295	0.00847982	0.530504	7	pSC.PGC.Mitotic.1_p.polyp
NvBr3-like-1 : NV2.21872	0	0	7	pSC.PGC.Mitotic.1_p.polyp
NvBr3-like-2 : NV2.16661	0.0215022	0.795756	6	pSC.PGC.Mitotic.1_p.polyp
NvCAdh-like 1 : NV2.25851	0.0293172	2.65252	8	pSC.PGC.Mitotic.1_p.polyp
NvCAdh-like 2 : NV2.1610	0.098493	5.30504	7	pSC.PGC.Mitotic.1_p.polyp
NvCAdh-like 3 : NV2.16479	0.0265441	1.32626	8	pSC.PGC.Mitotic.1_p.polyp
NvCAdh-like 4 : NV2.12411	0	0	7	pSC.PGC.Mitotic.1_p.polyp
NvCAdh-like 5 : NV2.21271	0.00888694	0.530504	7	pSC.PGC.Mitotic.1_p.polyp
NvCrumbs-like-1 : NV2.14808	0.00490844	0.265252	6	pSC.PGC.Mitotic.1_p.polyp
NvCrumbs-like-2 : NV2.6021	0.00474851	0.265252	7	pSC.PGC.Mitotic.1_p.polyp
NvCrumbs-like-3 : NV2.6444	0.00514711	0.530504	7	pSC.PGC.Mitotic.1_p.polyp
NvCrumbs-like-4 : NV2.10727	0.00696315	0.530504	7	pSC.PGC.Mitotic.1_p.polyp
NvCrumbs-like-5 : NV2.11903	0.0143181	1.32626	7	pSC.PGC.Mitotic.1_p.polyp
NvCrumbs-like-6 : NV2.19821	0.0167254	1.59151	10	pSC.PGC.Mitotic.1_p.polyp
NvCub-1 : NV2.2825	0.027889	2.12202	8	pSC.PGC.Mitotic.1_p.polyp
NvCub-2 : NV2.3736	0	0	6	pSC.PGC.Mitotic.1_p.polyp
NvCub-3 : NV2.3026	0.00522443	0.530504	14	pSC.PGC.Mitotic.1_p.polyp
NvCub-4 : NV2.2814	0.0633167	2.91777	12	pSC.PGC.Mitotic.1_p.polyp
NvCub-5 : NV2.5224	0.0117108	0.795756	6	pSC.PGC.Mitotic.1_p.polyp
NvCub-6 : NV2.13183	0.623132	33.687	11	pSC.PGC.Mitotic.1_p.polyp
NvFnt-3 : NV2.16585	0	0	7	pSC.PGC.Mitotic.1_p.polyp
NvFnt-1 : NV2.24355	0	0	7	pSC.PGC.Mitotic.1_p.polyp
NvFnt-ShKT : NV2.20323	0.0139604	0.795756	7	pSC.PGC.Mitotic.1_p.polyp
NvFnt-SEA2 : NV2.19078	0	0	7	pSC.PGC.Mitotic.1_p.polyp
NvFnt-3B-like : NV2.22291	0.0317342	2.91777	5	pSC.PGC.Mitotic.1_p.polyp
NvFnt-2 : NV2.12498	0.0676535	3.71353	11	pSC.PGC.Mitotic.1_p.polyp
NvFnt-CalX : NV2.23270	0.0893417	5.03979	9	pSC.PGC.Mitotic.1_p.polyp
NvFrzCub-1 : NV2.24045	0.0043257	0.265252	7	pSC.PGC.Mitotic.1_p.polyp
NvFrzCub-2 : NV2.24249	0.0179137	0.795756	7	pSC.PGC.Mitotic.1_p.polyp
NvHml-like 1 : NV2.3375	0.00312282	0.265252	7	pSC.PGC.Mitotic.1_p.polyp
NvHml-like 2 : NV2.5728	0	0	7	pSC.PGC.Mitotic.1_p.polyp
NvHml-like 3 : NV2.244	0.0061612	0.530504	6	pSC.PGC.Mitotic.1_p.polyp
NvHgfA-like : NV2.1272	0	0	7	pSC.PGC.Mitotic.1_p.polyp
NvHetC-like : NV2.2146	0	0	6	pSC.PGC.Mitotic.1_p.polyp
NvHCF1 : NV2.3399	0.129331	6.36605	13	pSC.PGC.Mitotic.1_p.polyp
NvIgCub : NV2.7762	0.0118628	0.265252	7	pSC.PGC.Mitotic.1_p.polyp
NvLeuIg-1 : NV2.988	0.162642	10.8753	10	pSC.PGC.Mitotic.1_p.polyp
NvLRPCub : NV2.24145	0	0	7	pSC.PGC.Mitotic.1_p.polyp
NvMAMCUB : NV2.23484	0.00217384	0.265252	7	pSC.PGC.Mitotic.1_p.polyp
NvMAMFnt : NV2.14399	0.00306013	0.265252	7	pSC.PGC.Mitotic.1_p.polyp
NvMLR : NV2.6810	0	0	7	pSC.PGC.Mitotic.1_p.polyp
NvNep8 : NV2.20322	0	0	7	pSC.PGC.Mitotic.1_p.polyp
NvPNtx1 : NV2.23160	0	0	NA	pSC.PGC.Mitotic.1_p.polyp
NvPIPlc : NV2.23846	0.00694047	0.530504	7	pSC.PGC.Mitotic.1_p.polyp
NvPk : NV2.24201	0.0120992	1.32626	8	pSC.PGC.Mitotic.1_p.polyp
NvTDA6-1 : NV2.21336	0	0	7	pSC.PGC.Mitotic.1_p.polyp
NvTDA6-2 : NV2.2896	0.431844	12.4668	9	pSC.PGC.Mitotic.1_p.polyp
NvRyn1 : NV2.17096	0.00223126	0.265252	7	pSC.PGC.Mitotic.1_p.polyp
NvRyn4 : NV2.4953	0.020526	1.32626	10	pSC.PGC.Mitotic.1_p.polyp
NvShoc2 : NV2.890	0.085104	5.83554	10	pSC.PGC.Mitotic.1_p.polyp
NvScrib : NV2.5524	0.830619	34.4828	11	pSC.PGC.Mitotic.1_p.polyp
NvSIntN : NV2.650	0.0210052	0.530504	7	pSC.PGC.Mitotic.1_p.polyp
NvSPP-like-1 : NV2.16360	0	0	7	pSC.PGC.Mitotic.1_p.polyp
NvSPP-like-2 : NV2.14010	0.00321674	0.265252	7	pSC.PGC.Mitotic.1_p.polyp
NvSPP-like-3 : NV2.24359	0.0103452	0.265252	7	pSC.PGC.Mitotic.1_p.polyp
NvTLDcP-1 : NV2.23765	0	0	7	pSC.PGC.Mitotic.1_p.polyp
NvTLDcP-2 : NV2.6705	0	0	6	pSC.PGC.Mitotic.1_p.polyp
NvTLDcP-3 : NV2.14920	0	0	7	pSC.PGC.Mitotic.1_p.polyp
NvTLDcP-5 : NV2.14921	0.0125228	0.530504	7	pSC.PGC.Mitotic.1_p.polyp
NvTSPd-2 : NV2.21289	0.0932045	4.50928	16	pSC.PGC.Mitotic.1_p.polyp
NvUru-like-1 : NV2.12183	0.0491604	2.65252	8	pSC.PGC.Mitotic.1_p.polyp
NvUru-like-2 : NV2.23645	0.00355566	0.265252	7	pSC.PGC.Mitotic.1_p.polyp
NvVef1-1 : NV2.3941	0	0	7	pSC.PGC.Mitotic.1_p.polyp
NvVef1-2 : NV2.3719	0	0	7	pSC.PGC.Mitotic.1_p.polyp
NvVef1-3 : NV2.4600	0.0165526	1.32626	7	pSC.PGC.Mitotic.1_p.polyp
NvvWFAShKT-1 : NV2.8258	0	0	7	pSC.PGC.Mitotic.1_p.polyp
NvvWFAShKT-2 : NV2.8260	0.00353952	0.265252	7	pSC.PGC.Mitotic.1_p.polyp
NvvThy : NV2.14046	0.0976678	4.50928	10	pSC.PGC.Mitotic.1_p.polyp
NvPkd1-like-1 : NV2.4979	0.00294006	0.265252	7	pSC.PGC.Mitotic.1_p.polyp
NvPkd1-like-2 : NV2.20778	0.263108	16.1804	9	pSC.PGC.Mitotic.1_p.polyp
NvPkd-like : NV2.18257	0.0148757	1.06101	8	pSC.PGC.Mitotic.1_p.polyp
NvTRP : NV2.10225	0.471872	23.8727	20	pSC.PGC.Mitotic.1_p.polyp
NvVgccA2-1 : NV2.16117	0.0842684	4.77454	9	pSC.PGC.Mitotic.1_p.polyp
NvVgccA2-2 : NV2.3042	0.247967	10.3448	8	pSC.PGC.Mitotic.1_p.polyp
NvCapcl-like-1 : NV2.3951	0	0	7	pSC.PGC.Mitotic.1_p.polyp
NvCapcl-like-2 : NV2.3157	0	0	7	pSC.PGC.Mitotic.1_p.polyp
NvAdh-like-1 : NV2.21728	0.00253927	0.265252	7	pSC.PGC.Mitotic.1_p.polyp
NvAdh-like-2 : NV2.570	0	0	7	pSC.PGC.Mitotic.1_p.polyp
NvAdhGPCR-1 : NV2.21788	0.0930947	5.57029	9	pSC.PGC.Mitotic.1_p.polyp
NvAdhGPCR-2 : NV2.1634	0.0474586	2.91777	8	pSC.PGC.Mitotic.1_p.polyp
NvAdhGPCR-3 : NV2.502	0.0519018	3.71353	10	pSC.PGC.Mitotic.1_p.polyp
NvAdhGPCR-4 : NV2.743	0.0165463	1.06101	6	pSC.PGC.Mitotic.1_p.polyp
NvAntxR-1 : NV2.5700	0.0171925	1.85676	5	pSC.PGC.Mitotic.1_p.polyp
NvAntxR-2 : NV2.8769	0	0	7	pSC.PGC.Mitotic.1_p.polyp
NvAntxR-3 : NV2.8406	0.0346751	1.59151	7	pSC.PGC.Mitotic.1_p.polyp
NvAntxR-4 : NV2.8980	0.0297199	0.530504	7	pSC.PGC.Mitotic.1_p.polyp
NvAntxR-5 : NV2.21936	0	0	7	pSC.PGC.Mitotic.1_p.polyp
NvApex-1 : NV2.7757	0	0	7	pSC.PGC.Mitotic.1_p.polyp
NvApex-2 : NV2.893	0.00481226	0.265252	7	pSC.PGC.Mitotic.1_p.polyp
NvApex-3 : NV2.6315	0	0	7	pSC.PGC.Mitotic.1_p.polyp
NvApex-4 : NV2.7641	0.0041951	0.530504	7	pSC.PGC.Mitotic.1_p.polyp
NvAtrn : NV2.18302	0.131117	6.6313	9	pSC.PGC.Mitotic.1_p.polyp
NvBai-1 : NV2.10733	0	0	7	pSC.PGC.Mitotic.1_p.polyp
NvCD34-1 : NV2.17446	0	0	6	pSC.PGC.Mitotic.1_p.polyp
NvCD34-2 : NV2.17449	0.00429071	0.265252	7	pSC.PGC.Mitotic.1_p.polyp
NvClsr-like-1 : NV2.4191	0	0	7	pSC.PGC.Mitotic.1_p.polyp
NvClsr-like-2 : NV2.8347	0.214431	11.1406	16	pSC.PGC.Mitotic.1_p.polyp
NvClsr-like-3 : NV2.13293	0.00369329	0.265252	7	pSC.PGC.Mitotic.1_p.polyp
NvCadSeaEGF : NV2.5727	0	0	7	pSC.PGC.Mitotic.1_p.polyp
NvCDH-1 : NV2.4715	0.543456	27.321	11	pSC.PGC.Mitotic.1_p.polyp
NvCDH-2 : NV2.11625	0	0	7	pSC.PGC.Mitotic.1_p.polyp
NvCDH-3 : NV2.4921	0.280128	14.8541	13	pSC.PGC.Mitotic.1_p.polyp
NvCntcP-like-1 : NV2.16567	0.00470973	0.265252	7	pSC.PGC.Mitotic.1_p.polyp
NvCntcP-like-2 : NV2.4683	0	0	7	pSC.PGC.Mitotic.1_p.polyp
NvCntcP-like-3 : NV2.4704	0	0	7	pSC.PGC.Mitotic.1_p.polyp
NvCntc-like : NV2.360	0.0538361	3.18302	8	pSC.PGC.Mitotic.1_p.polyp
NvCpne-1 : NV2.137	0.136488	9.81432	11	pSC.PGC.Mitotic.1_p.polyp
NvCpne-2 : NV2.4625	0.151277	9.54907	12	pSC.PGC.Mitotic.1_p.polyp
NvCykR-1 : NV2.21729	0	0	7	pSC.PGC.Mitotic.1_p.polyp
NvCykR-10 : NV2.16931	0	0	8	pSC.PGC.Mitotic.1_p.polyp
NvCykR-11 : NV2.22551	0	0	7	pSC.PGC.Mitotic.1_p.polyp
NvCykR-12 : NV2.12207	0	0	NA	pSC.PGC.Mitotic.1_p.polyp
NvCykR-13 : NV2.1800	0.0321082	1.85676	20	pSC.PGC.Mitotic.1_p.polyp
NvCykR-14 : NV2.11900	0	0	7	pSC.PGC.Mitotic.1_p.polyp
NvCykR-15 : NV2.12582	0	0	7	pSC.PGC.Mitotic.1_p.polyp
NvCykR-2 : NV2.3810	0.00417999	0.530504	7	pSC.PGC.Mitotic.1_p.polyp
NvCykR-3 : NV2.22951	0	0	7	pSC.PGC.Mitotic.1_p.polyp
NvCykR-4 : NV2.14182	0.0198765	1.32626	6	pSC.PGC.Mitotic.1_p.polyp
NvCykR-5 : NV2.2940	0.00253927	0.265252	7	pSC.PGC.Mitotic.1_p.polyp
NvCykR-6 : NV2.3577	0	0	7	pSC.PGC.Mitotic.1_p.polyp
NvCykR-7 : NV2.9493	0.0596999	4.24403	13	pSC.PGC.Mitotic.1_p.polyp
NvCykR-8 : NV2.10456	0.103326	6.89655	11	pSC.PGC.Mitotic.1_p.polyp
NvCykR-9 : NV2.17701	0.012301	1.06101	15	pSC.PGC.Mitotic.1_p.polyp
NvFrazz : NV2.14222	0.214598	14.3236	7	pSC.PGC.Mitotic.1_p.polyp
NvDomCykR-1 : NV2.12653	0.181853	10.0796	13	pSC.PGC.Mitotic.1_p.polyp
NvDomCykR-2 : NV2.20188	0	0	7	pSC.PGC.Mitotic.1_p.polyp
NvDomCykR-3 : NV2.20819	0	0	7	pSC.PGC.Mitotic.1_p.polyp
NvDomCykR-4 : NV2.23796	0	0	7	pSC.PGC.Mitotic.1_p.polyp
NvDom : NV2.22950	0	0	7	pSC.PGC.Mitotic.1_p.polyp
NvDomR : NV2.11373	0	0	7	pSC.PGC.Mitotic.1_p.polyp
NvDscaml : NV2.22749	0	0	6	pSC.PGC.Mitotic.1_p.polyp
NvEGF-2 : NV2.10370	0	0	8	pSC.PGC.Mitotic.1_p.polyp
NvPolyEGF-PANApp : NV2.16090	0	0	7	pSC.PGC.Mitotic.1_p.polyp
NvPolyEGF-Disc-2 : NV2.3396	0	0	6	pSC.PGC.Mitotic.1_p.polyp
NvPolyEGF-Disc-5 : NV2.19905	0	0	7	pSC.PGC.Mitotic.1_p.polyp
NvPolyEGF-Disc-6 : NV2.24544	0.00306013	0.265252	8	pSC.PGC.Mitotic.1_p.polyp
NvPolyEGF-Disc-7 : NV2.24611	0	0	7	pSC.PGC.Mitotic.1_p.polyp
NvPolyEGF-Hint : NV2.12346	0	0	6	pSC.PGC.Mitotic.1_p.polyp
NvPolyEGF-16 : NV2.24533	0.0287555	2.12202	10	pSC.PGC.Mitotic.1_p.polyp
NvPolyEGF-19 : NV2.5536	0.00297635	0.265252	14	pSC.PGC.Mitotic.1_p.polyp
NvEphr-like 1 : NV2.13270	0.0598087	4.77454	10	pSC.PGC.Mitotic.1_p.polyp
NvEphr-like 2 : NV2.19863	0	0	7	pSC.PGC.Mitotic.1_p.polyp
NvFAT : NV2.3227	0.0927065	4.77454	9	pSC.PGC.Mitotic.1_p.polyp
NvFat-like : NV2.3144	0.389004	19.8939	16	pSC.PGC.Mitotic.1_p.polyp
NvFatCad-1 : NV2.17172	0.0187568	1.06101	8	pSC.PGC.Mitotic.1_p.polyp
NvFatCad-2 : NV2.4933	0	0	6	pSC.PGC.Mitotic.1_p.polyp
NvEGF-repeat-35 : NV2.4783	0.0289701	2.12202	8	pSC.PGC.Mitotic.1_p.polyp
NvGFR-1 : NV2.25188	0	0	7	pSC.PGC.Mitotic.1_p.polyp
NvGFR-2 : NV2.13801	0.00542438	0.265252	7	pSC.PGC.Mitotic.1_p.polyp
NvIgSushi : NV2.17065	0	0	7	pSC.PGC.Mitotic.1_p.polyp
NvIg-Thyr : NV2.21898	0	0	7	pSC.PGC.Mitotic.1_p.polyp
NvIgCam-1 : NV2.361	0.0174273	1.06101	4	pSC.PGC.Mitotic.1_p.polyp
NvIgCam-2 : NV2.14189	0.0120468	0.795756	6	pSC.PGC.Mitotic.1_p.polyp
NvIgCam-3 : NV2.15289	0.0754219	5.30504	8	pSC.PGC.Mitotic.1_p.polyp
NvIgCam-4 : NV2.15862	0.00645142	0.530504	6	pSC.PGC.Mitotic.1_p.polyp
NvIgCam-5 : NV2.21828	0	0	7	pSC.PGC.Mitotic.1_p.polyp
NvIgCam-6 : NV2.21855	0.329552	19.3634	19	pSC.PGC.Mitotic.1_p.polyp
NvIgCam-7 : NV2.21994	0.0843809	5.57029	8	pSC.PGC.Mitotic.1_p.polyp
NvIgCam-8 : NV2.22319	0	0	7	pSC.PGC.Mitotic.1_p.polyp
NvIgCam-9 : NV2.22600	0.0698244	4.77454	11	pSC.PGC.Mitotic.1_p.polyp
NvIgCamZP : NV2.21903	0.210449	12.7321	16	pSC.PGC.Mitotic.1_p.polyp
NvIgCam-related-1 : NV2.22270	0	0	7	pSC.PGC.Mitotic.1_p.polyp
NvIgCam-related-2 : NV2.325	0.00206873	0.265252	7	pSC.PGC.Mitotic.1_p.polyp
NvIGF : NV2.23604	0.0303872	2.38727	9	pSC.PGC.Mitotic.1_p.polyp
NvL1Cam-1 : NV2.1171	0.731106	31.8302	13	pSC.PGC.Mitotic.1_p.polyp
NvL1Cam-2 : NV2.702	0.064527	3.44828	9	pSC.PGC.Mitotic.1_p.polyp
NvLRP-Polydom : NV2.788	0	0	6	pSC.PGC.Mitotic.1_p.polyp
NvLeuGPCR-like-1 : NV2.2571	0.00223804	0.265252	9	pSC.PGC.Mitotic.1_p.polyp
NvLeuGPCR-like-2 : NV2.7502	0	0	7	pSC.PGC.Mitotic.1_p.polyp
NvLeuGPCR-like-3 : NV2.17941	0	0	7	pSC.PGC.Mitotic.1_p.polyp
NvLeuGPCR-like-4 : NV2.20131	0	0	6	pSC.PGC.Mitotic.1_p.polyp
NvLeuGPCR-like-5 : NV2.15921	0.00286697	0.265252	8	pSC.PGC.Mitotic.1_p.polyp
NvLeuGPCR-like-6 : NV2.22026	0	0	7	pSC.PGC.Mitotic.1_p.polyp
NvLeu : NV2.12452	0	0	7	pSC.PGC.Mitotic.1_p.polyp
NvLeuIg-2 : NV2.24051	0	0	6	pSC.PGC.Mitotic.1_p.polyp
NvLRP-like : NV2.14749	0.0167035	0.265252	9	pSC.PGC.Mitotic.1_p.polyp
NvLRP1/2 : NV2.12145	0.0465256	2.91777	12	pSC.PGC.Mitotic.1_p.polyp
NvMANSCR-1 : NV2.5949	0.107082	5.03979	8	pSC.PGC.Mitotic.1_p.polyp
NvMANSCR-2 : NV2.22155	0.0024524	0.265252	7	pSC.PGC.Mitotic.1_p.polyp
NvMmanR-1 : NV2.12165	0	0	7	pSC.PGC.Mitotic.1_p.polyp
NvMmanR-2 : NV2.9511	0.0112395	0.265252	7	pSC.PGC.Mitotic.1_p.polyp
NvMmanR-3 : NV2.12172	0.0151879	0.530504	8	pSC.PGC.Mitotic.1_p.polyp
NvNCAM-1 : NV2.21158	0.0563546	3.97878	8	pSC.PGC.Mitotic.1_p.polyp
NvNCAM1-1 : NV2.21902	0.856348	37.931	11	pSC.PGC.Mitotic.1_p.polyp
NvNCAM-2 : NV2.21211	0.00331316	0.265252	8	pSC.PGC.Mitotic.1_p.polyp
NvNCAM-6 : NV2.21924	0.0288853	0.795756	5	pSC.PGC.Mitotic.1_p.polyp
NvNCAM-like-1 : NV2.18115	0.0119807	0.265252	8	pSC.PGC.Mitotic.1_p.polyp
NvNCAM-like-2 : NV2.20308	0.2336	14.0584	8	pSC.PGC.Mitotic.1_p.polyp
NvNCAM-like-3 : NV2.21151	0.0685617	4.24403	8	pSC.PGC.Mitotic.1_p.polyp
NvNCAM-related-1 : NV2.22495	0.612783	30.504	13	pSC.PGC.Mitotic.1_p.polyp
NvNCAM-related-2 : NV2.22081	0.058513	4.77454	10	pSC.PGC.Mitotic.1_p.polyp
NvNCAM-related-3 : NV2.25565	0.0683002	5.03979	10	pSC.PGC.Mitotic.1_p.polyp
NvUNC5 : NV2.14588	0.0183651	0.530504	8	pSC.PGC.Mitotic.1_p.polyp
NvNrxn : NV2.11326	1.35659	50.9284	20	pSC.PGC.Mitotic.1_p.polyp
NvNrxn-like-1 : NV2.16569	0	0	7	pSC.PGC.Mitotic.1_p.polyp
NvNrxn-like-2 : NV2.17148	0	0	7	pSC.PGC.Mitotic.1_p.polyp
NvNrxn-like-3 : NV2.19653	0.00926701	0.795756	7	pSC.PGC.Mitotic.1_p.polyp
NvNrxn-like-4 : NV2.9601	0.917427	38.7268	11	pSC.PGC.Mitotic.1_p.polyp
NvNrxn-like-5 : NV2.17038	0	0	7	pSC.PGC.Mitotic.1_p.polyp
NvNrxn-like-6 : NV2.17107	0	0	7	pSC.PGC.Mitotic.1_p.polyp
NvNrpTol1l-like : NV2.14795	0.0494749	2.91777	6	pSC.PGC.Mitotic.1_p.polyp
NvNrp-related : NV2.6344	0.0623822	3.71353	6	pSC.PGC.Mitotic.1_p.polyp
NvHedgeling : NV2.2229	0.00502562	0.265252	7	pSC.PGC.Mitotic.1_p.polyp
NvOIT3-1 : NV2.24478	0	0	7	pSC.PGC.Mitotic.1_p.polyp
NvOIT3-2 : NV2.25392	0	0	7	pSC.PGC.Mitotic.1_p.polyp
NvOIT3-3 : NV2.25393	0	0	7	pSC.PGC.Mitotic.1_p.polyp
NvPINLabA : NV2.11073	0	0	6	pSC.PGC.Mitotic.1_p.polyp
NvPlxn : NV2.2812	0.0160665	0.530504	8	pSC.PGC.Mitotic.1_p.polyp
NvSdk1 : NV2.6892	0.0763303	2.91777	12	pSC.PGC.Mitotic.1_p.polyp
NvTlpB : NV2.21328	0.0434849	1.85676	6	pSC.PGC.Mitotic.1_p.polyp
NvFATPCad4-like-1 : NV2.8636	0.14	8.75332	19	pSC.PGC.Mitotic.1_p.polyp
NvFATPCad4-like-2 : NV2.23593	0	0	7	pSC.PGC.Mitotic.1_p.polyp
NvFATPCad4-like-3 : NV2.23594	0	0	7	pSC.PGC.Mitotic.1_p.polyp
NvPCad : NV2.4934	0	0	6	pSC.PGC.Mitotic.1_p.polyp
NvROR2-like : NV2.6768	0.0152437	0.795756	7	pSC.PGC.Mitotic.1_p.polyp
NvPTypPF-like : NV2.12583	0.00637625	0.265252	7	pSC.PGC.Mitotic.1_p.polyp
NvPTypP-like : NV2.601	0.00317135	0.265252	8	pSC.PGC.Mitotic.1_p.polyp
NvPTypP-related : NV2.11797	0.0355904	2.12202	7	pSC.PGC.Mitotic.1_p.polyp
NvRobo-like : NV2.21353	0.161223	9.81432	9	pSC.PGC.Mitotic.1_p.polyp
NvScaraA : NV2.24984	0	0	7	pSC.PGC.Mitotic.1_p.polyp
NvScara1-like-1 : NV2.12749	0	0	7	pSC.PGC.Mitotic.1_p.polyp
NvScara1-like-2 : NV2.22574	0.0381613	2.38727	8	pSC.PGC.Mitotic.1_p.polyp
NvScara1-like-3 : NV2.17488	0.0223392	1.32626	12	pSC.PGC.Mitotic.1_p.polyp
NvScara1-like-4 : NV2.24169	0.282297	20.1592	8	pSC.PGC.Mitotic.1_p.polyp
NvScara-like : NV2.6127	0	0	7	pSC.PGC.Mitotic.1_p.polyp
NvSThrR : NV2.14724	0.0166628	0.795756	7	pSC.PGC.Mitotic.1_p.polyp
NvSEF-like : NV2.2939	0.14618	8.48806	10	pSC.PGC.Mitotic.1_p.polyp
NvSnaclec-like-1 : NV2.25143	0.0813732	5.03979	10	pSC.PGC.Mitotic.1_p.polyp
NvSortR : NV2.16213	0.359141	19.0981	20	pSC.PGC.Mitotic.1_p.polyp
NvSpadh-like-1 : NV2.20657	0.0407055	0.795756	7	pSC.PGC.Mitotic.1_p.polyp
NvSpadh-like-2 : NV2.3538	0.0918466	6.89655	14	pSC.PGC.Mitotic.1_p.polyp
NvSpadh-like-3 : NV2.3539	0	0	7	pSC.PGC.Mitotic.1_p.polyp
NvSpadh-like-4 : NV2.14569	0	0	6	pSC.PGC.Mitotic.1_p.polyp
NvStab2 : NV2.1696	0.384723	18.5676	12	pSC.PGC.Mitotic.1_p.polyp
NvSOL-like-1 : NV2.14373	0.0299666	2.38727	5	pSC.PGC.Mitotic.1_p.polyp
NvSOL-like-10 : NV2.16314	0.00821772	0.795756	7	pSC.PGC.Mitotic.1_p.polyp
NvSOL-like-11 : NV2.16315	0.177272	7.1618	18	pSC.PGC.Mitotic.1_p.polyp
NvSOL-like-2 : NV2.22311	0	0	7	pSC.PGC.Mitotic.1_p.polyp
NvSOL-like-3 : NV2.1288	0.362428	21.7507	11	pSC.PGC.Mitotic.1_p.polyp
NvSOL-like-4 : NV2.3066	0	0	7	pSC.PGC.Mitotic.1_p.polyp
NvSOL-like-5 : NV2.3167	0.0915175	6.36605	10	pSC.PGC.Mitotic.1_p.polyp
NvSOL-like-6 : NV2.3169	0.143493	8.75332	7	pSC.PGC.Mitotic.1_p.polyp
NvSOL-like-7 : NV2.3625	0.533447	32.0955	11	pSC.PGC.Mitotic.1_p.polyp
NvSOL-like-8 : NV2.3699	0.122536	6.1008	7	pSC.PGC.Mitotic.1_p.polyp
NvSOL-like-9 : NV2.13356	0.0865347	5.03979	7	pSC.PGC.Mitotic.1_p.polyp
NvSRPX-like : NV2.1314	0.00386314	0.530504	7	pSC.PGC.Mitotic.1_p.polyp
NvSushiEGFZP-1 : NV2.12863	0.0159305	0.795756	6	pSC.PGC.Mitotic.1_p.polyp
NvSushiEGFZP-2 : NV2.12864	0.0415941	1.59151	7	pSC.PGC.Mitotic.1_p.polyp
NvTGFbR : NV2.5822	0.164086	9.28382	7	pSC.PGC.Mitotic.1_p.polyp
NvTNF-R : NV2.21120	0.0138857	1.06101	7	pSC.PGC.Mitotic.1_p.polyp
NvTSP-SEA-1 : NV2.18776	0	0	7	pSC.PGC.Mitotic.1_p.polyp
NvTSP-SEA-2 : NV2.19022	0	0	7	pSC.PGC.Mitotic.1_p.polyp
NvTSPd-1 : NV2.24334	0.0336504	2.65252	7	pSC.PGC.Mitotic.1_p.polyp
NvTSPd-4 : NV2.18394	0.0247656	1.32626	6	pSC.PGC.Mitotic.1_p.polyp
NvTSPd-5 : NV2.22114	0.0508417	4.77454	7	pSC.PGC.Mitotic.1_p.polyp
NvTSPDiscEGF : NV2.1784	0	0	7	pSC.PGC.Mitotic.1_p.polyp
NvTSP-TLD : NV2.8772	0	0	7	pSC.PGC.Mitotic.1_p.polyp
NvThyr-TSP-EGF : NV2.4066	0.0448262	3.44828	7	pSC.PGC.Mitotic.1_p.polyp
NvTyrRor2-like : NV2.12077	0.00226479	0.265252	7	pSC.PGC.Mitotic.1_p.polyp
NvvLDL-1 : NV2.1025	0.137634	8.22281	8	pSC.PGC.Mitotic.1_p.polyp
NvvLDL-2 : NV2.1337	0.685227	33.9523	7	pSC.PGC.Mitotic.1_p.polyp
NvvLDL-3 : NV2.9849	0.0492959	2.38727	6	pSC.PGC.Mitotic.1_p.polyp
NvVgtR-like-1 : NV2.12147	0.0194408	1.59151	8	pSC.PGC.Mitotic.1_p.polyp
NvVgtR-like-2 : NV2.18927	0	0	7	pSC.PGC.Mitotic.1_p.polyp
NvWAPIgZP-1 : NV2.11345	0.151122	10.0796	16	pSC.PGC.Mitotic.1_p.polyp
NvWAPIgZP-2 : NV2.11632	0	0	7	pSC.PGC.Mitotic.1_p.polyp
NvZP-1 : NV2.5824	1.73536	57.8249	11	pSC.PGC.Mitotic.1_p.polyp
NvZP-2 : NV2.11069	0.0651108	5.30504	10	pSC.PGC.Mitotic.1_p.polyp
NvZP-3 : NV2.21905	0.00233867	0.265252	8	pSC.PGC.Mitotic.1_p.polyp
NvZP-4 : NV2.22367	0	0	7	pSC.PGC.Mitotic.1_p.polyp
NvvWFAc1-1 : NV2.628	0	0	7	pSC.PGC.Mitotic.1_p.polyp
NvvWFAc1-2 : NV2.903	0.0673846	3.44828	20	pSC.PGC.Mitotic.1_p.polyp
NvvWFAc1-3 : NV2.1994	0.00944814	0.795756	7	pSC.PGC.Mitotic.1_p.polyp
NvCol4b : NV2.21409	0.712527	10.4167	10	pSC.PGC.Mitotic.1_AdultSubset
NvNCol-3 : NV2.10686	0.26764	12.5	6	pSC.PGC.Mitotic.1_AdultSubset
NvTSPEAR : NV2.8096	0.0567666	2.08333	7	pSC.PGC.Mitotic.1_AdultSubset
NvCol6-like-1 : NV2.23164	0	0	7	pSC.PGC.Mitotic.1_AdultSubset
NvCol6-like-2 : NV2.23710	0	0	7	pSC.PGC.Mitotic.1_AdultSubset
NvCol6-like-3 : NV2.24229	0	0	7	pSC.PGC.Mitotic.1_AdultSubset
NvCol6-like-4 : NV2.14089	0	0	7	pSC.PGC.Mitotic.1_AdultSubset
NvCol18 : NV2.11420	0	0	6	pSC.PGC.Mitotic.1_AdultSubset
NvColIg : NV2.9101	0	0	6	pSC.PGC.Mitotic.1_AdultSubset
NvCTHRC : NV2.2667	0.0917768	2.08333	8	pSC.PGC.Mitotic.1_AdultSubset
NvCol4 : NV2.21411	0.114049	4.16667	7	pSC.PGC.Mitotic.1_AdultSubset
NvCol-7 : NV2.24375	0	0	6	pSC.PGC.Mitotic.1_AdultSubset
NvCol-like-1 : NV2.5987	0	0	6	pSC.PGC.Mitotic.1_AdultSubset
NvCol-like-10 : NV2.13883	0.0638488	4.16667	10	pSC.PGC.Mitotic.1_AdultSubset
NvCol-like-2 : NV2.19801	0	0	7	pSC.PGC.Mitotic.1_AdultSubset
NvCol-like-3 : NV2.21821	0	0	6	pSC.PGC.Mitotic.1_AdultSubset
NvCol-like-4 : NV2.21793	0	0	7	pSC.PGC.Mitotic.1_AdultSubset
NvCol-like-5 : NV2.19798	0	0	6	pSC.PGC.Mitotic.1_AdultSubset
NvCol-like-6 : NV2.19811	0.0617566	4.16667	12	pSC.PGC.Mitotic.1_AdultSubset
NvCol-like-7 : NV2.20296	0	0	6	pSC.PGC.Mitotic.1_AdultSubset
NvCol-like-8 : NV2.7052	0.0215755	2.08333	8	pSC.PGC.Mitotic.1_AdultSubset
NvCol-like-9 : NV2.8768	0	0	7	pSC.PGC.Mitotic.1_AdultSubset
NvCol1a : NV2.24535	0.0284686	2.08333	6	pSC.PGC.Mitotic.1_AdultSubset
NvCol1b : NV2.11872	0	0	6	pSC.PGC.Mitotic.1_AdultSubset
NvCol1c : NV2.12027	0.342586	10.4167	7	pSC.PGC.Mitotic.1_AdultSubset
NvCol2a : NV2.12159	0	0	6	pSC.PGC.Mitotic.1_AdultSubset
NvCol2b : NV2.12104	0.109881	4.16667	6	pSC.PGC.Mitotic.1_AdultSubset
NvCol5 : NV2.24536	0.0222721	2.08333	7	pSC.PGC.Mitotic.1_AdultSubset
NvCol2c : NV2.10959	0.0397886	2.08333	6	pSC.PGC.Mitotic.1_AdultSubset
NvNCol-7 : NV2.11814	0	0	6	pSC.PGC.Mitotic.1_AdultSubset
NvNCol1 : NV2.12621	0.0293924	2.08333	7	pSC.PGC.Mitotic.1_AdultSubset
NvNCol4 : NV2.11801	0	0	7	pSC.PGC.Mitotic.1_AdultSubset
NvNCol5 : NV2.11802	0.387343	8.33333	7	pSC.PGC.Mitotic.1_AdultSubset
NvNCol6 : NV2.11815	0.0633165	4.16667	7	pSC.PGC.Mitotic.1_AdultSubset
NvNCol-like 1 : NV2.363	0	0	7	pSC.PGC.Mitotic.1_AdultSubset
NvNCol-like 3 : NV2.11816	0.0876086	2.08333	7	pSC.PGC.Mitotic.1_AdultSubset
NvNCol-like 4 : NV2.11818	0.0594898	2.08333	7	pSC.PGC.Mitotic.1_AdultSubset
NvSpongin-like-1 : NV2.7278	0	0	7	pSC.PGC.Mitotic.1_AdultSubset
NvSpongin-like-2 : NV2.7899	0	0	6	pSC.PGC.Mitotic.1_AdultSubset
NvSpongin-like-3 : NV2.8393	0.0315084	2.08333	8	pSC.PGC.Mitotic.1_AdultSubset
NvSpongin-like-4 : NV2.8836	0	0	7	pSC.PGC.Mitotic.1_AdultSubset
NvLpxACol : NV2.11419	0	0	7	pSC.PGC.Mitotic.1_AdultSubset
NvvWFAGGP : NV2.8259	0	0	7	pSC.PGC.Mitotic.1_AdultSubset
NvvWFA-1 : NV2.856	0.0284686	2.08333	9	pSC.PGC.Mitotic.1_AdultSubset
NvArgn-1 : NV2.14093	0	0	6	pSC.PGC.Mitotic.1_AdultSubset
NvArgn-2 : NV2.13522	0	0	7	pSC.PGC.Mitotic.1_AdultSubset
NvDSLvWFA : NV2.9243	0.118456	4.16667	11	pSC.PGC.Mitotic.1_AdultSubset
NvDMBT-1 : NV2.14958	0.0397886	2.08333	5	pSC.PGC.Mitotic.1_AdultSubset
NvDMBT-2 : NV2.24741	0	0	6	pSC.PGC.Mitotic.1_AdultSubset
NvDSPP : NV2.13059	0	0	7	pSC.PGC.Mitotic.1_AdultSubset
NvDisc-Ig : NV2.1116	0	0	7	pSC.PGC.Mitotic.1_AdultSubset
NvDisc-SEA : NV2.12171	0.0917768	2.08333	10	pSC.PGC.Mitotic.1_AdultSubset
NvDisc-Sushi-1 : NV2.25722	0	0	7	pSC.PGC.Mitotic.1_AdultSubset
NvDisc-Sushi-2 : NV2.25724	0	0	6	pSC.PGC.Mitotic.1_AdultSubset
NvDisc : NV2.997	0	0	7	pSC.PGC.Mitotic.1_AdultSubset
EGF-triLpxA : NV2.12181	0	0	7	pSC.PGC.Mitotic.1_AdultSubset
NvPolyEGF-PTX-1 : NV2.5962	0	0	7	pSC.PGC.Mitotic.1_AdultSubset
NvPolyEGF-PTX-2 : NV2.23171	0	0	7	pSC.PGC.Mitotic.1_AdultSubset
NvPolyEGF-Sushi-Ig : NV2.17270	0	0	6	pSC.PGC.Mitotic.1_AdultSubset
NvEGF-1 : NV2.10398	0	0	7	pSC.PGC.Mitotic.1_AdultSubset
NvAdhGPCR-E1 : NV2.20524	0.0227736	2.08333	8	pSC.PGC.Mitotic.1_AdultSubset
NvPolyEGF-Disc-1 : NV2.10636	0	0	7	pSC.PGC.Mitotic.1_AdultSubset
NvPolyEGF-Disc-3 : NV2.13422	0	0	7	pSC.PGC.Mitotic.1_AdultSubset
NvPolyEGF-Disc-4 : NV2.13802	0	0	7	pSC.PGC.Mitotic.1_AdultSubset
NvPolyEGF-Disc-8 : NV2.9055	0	0	7	pSC.PGC.Mitotic.1_AdultSubset
NvPolyEGF-5 : NV2.6022	0	0	7	pSC.PGC.Mitotic.1_AdultSubset
NvPolyEGF-6 : NV2.24285	0	0	7	pSC.PGC.Mitotic.1_AdultSubset
NvPolyEGF-7 : NV2.24286	0	0	7	pSC.PGC.Mitotic.1_AdultSubset
NvPolyEGF-8 : NV2.23400	0	0	8	pSC.PGC.Mitotic.1_AdultSubset
NvPolyEGF-9 : NV2.19497	0	0	7	pSC.PGC.Mitotic.1_AdultSubset
NvPolyEGF-10 : NV2.3706	0	0	7	pSC.PGC.Mitotic.1_AdultSubset
NvPolyEGF-11 : NV2.6897	0	0	7	pSC.PGC.Mitotic.1_AdultSubset
NvPolyEGF-12 : NV2.7683	0	0	6	pSC.PGC.Mitotic.1_AdultSubset
NvPolyEGF-13 : NV2.11904	0	0	7	pSC.PGC.Mitotic.1_AdultSubset
NvPolyEGF-14 : NV2.17951	0	0	7	pSC.PGC.Mitotic.1_AdultSubset
NvPolyEGF-15 : NV2.23650	0	0	7	pSC.PGC.Mitotic.1_AdultSubset
NvPolyEGF-17 : NV2.6034	0	0	7	pSC.PGC.Mitotic.1_AdultSubset
NvPolyEGF-18 : NV2.6437	0	0	7	pSC.PGC.Mitotic.1_AdultSubset
NvPolyEGF-20 : NV2.24543	0	0	7	pSC.PGC.Mitotic.1_AdultSubset
NvEmilin1 : NV2.10668	0	0	7	pSC.PGC.Mitotic.1_AdultSubset
NvFbn : NV2.22931	0	0	7	pSC.PGC.Mitotic.1_AdultSubset
NvFbn-1 : NV2.22930	0	0	7	pSC.PGC.Mitotic.1_AdultSubset
NvFbn-2 : NV2.22932	0	0	7	pSC.PGC.Mitotic.1_AdultSubset
NvFbn-3 : NV2.14812	0	0	5	pSC.PGC.Mitotic.1_AdultSubset
NvFib-like : NV2.10397	0	0	7	pSC.PGC.Mitotic.1_AdultSubset
NvFp-like-1 : NV2.3028	0	0	7	pSC.PGC.Mitotic.1_AdultSubset
NvFp-like-10 : NV2.25686	0	0	7	pSC.PGC.Mitotic.1_AdultSubset
NvFp-like-2 : NV2.6439	0	0	7	pSC.PGC.Mitotic.1_AdultSubset
NvFp-like-3 : NV2.10691	0	0	7	pSC.PGC.Mitotic.1_AdultSubset
NvFp-like-4 : NV2.5916	0	0	7	pSC.PGC.Mitotic.1_AdultSubset
NvFp-like-5 : NV2.5917	0	0	7	pSC.PGC.Mitotic.1_AdultSubset
NvFp-like-6 : NV2.5918	0	0	7	pSC.PGC.Mitotic.1_AdultSubset
NvFp-like-7 : NV2.6438	0	0	7	pSC.PGC.Mitotic.1_AdultSubset
NvFp-like-8 : NV2.6441	0.266674	4.16667	9	pSC.PGC.Mitotic.1_AdultSubset
NvFp-like-9 : NV2.13189	0	0	7	pSC.PGC.Mitotic.1_AdultSubset
NvFbln : NV2.3768	0	0	6	pSC.PGC.Mitotic.1_AdultSubset
NvHmcn1-like 1 : NV2.23125	0	0	6	pSC.PGC.Mitotic.1_AdultSubset
NvHncn1 : NV2.24790	0	0	7	pSC.PGC.Mitotic.1_AdultSubset
NvMFGE-like-1 : NV2.10243	0	0	7	pSC.PGC.Mitotic.1_AdultSubset
NvMFGE-like-2 : NV2.10407	0	0	7	pSC.PGC.Mitotic.1_AdultSubset
NvMFGE-like-3 : NV2.15715	0	0	7	pSC.PGC.Mitotic.1_AdultSubset
NvMFGE-like-4 : NV2.15716	0.126416	2.08333	10	pSC.PGC.Mitotic.1_AdultSubset
NvMFGE-like-5 : NV2.5960	0	0	7	pSC.PGC.Mitotic.1_AdultSubset
NvLamA1 : NV2.24158	0	0	7	pSC.PGC.Mitotic.1_AdultSubset
NvLamA1-like : NV2.22840	0	0	6	pSC.PGC.Mitotic.1_AdultSubset
NvLamA5 : NV2.17119	0	0	6	pSC.PGC.Mitotic.1_AdultSubset
NvLamA-like : NV2.15819	0	0	7	pSC.PGC.Mitotic.1_AdultSubset
NvLamB1-1 : NV2.1719	0	0	7	pSC.PGC.Mitotic.1_AdultSubset
NvLamB1-2 : NV2.24496	0.252701	8.33333	13	pSC.PGC.Mitotic.1_AdultSubset
NvLamB1-3 : NV2.24823	0.0205376	2.08333	7	pSC.PGC.Mitotic.1_AdultSubset
NvLamB2-1 : NV2.25732	0	0	6	pSC.PGC.Mitotic.1_AdultSubset
NvLamB2-2 : NV2.25734	0	0	7	pSC.PGC.Mitotic.1_AdultSubset
NvLamG : NV2.25737	0.0917768	2.08333	8	pSC.PGC.Mitotic.1_AdultSubset
NvMatn-1 : NV2.836	0.191483	2.08333	16	pSC.PGC.Mitotic.1_AdultSubset
NvMatn-2 : NV2.840	0	0	7	pSC.PGC.Mitotic.1_AdultSubset
NvMatn-3 : NV2.841	0	0	7	pSC.PGC.Mitotic.1_AdultSubset
NvMatn-4 : NV2.842	0	0	7	pSC.PGC.Mitotic.1_AdultSubset
NvMatn-5 : NV2.843	0	0	7	pSC.PGC.Mitotic.1_AdultSubset
NvMatn-6 : NV2.845	0	0	7	pSC.PGC.Mitotic.1_AdultSubset
NvMatn-7 : NV2.18428	0	0	7	pSC.PGC.Mitotic.1_AdultSubset
NvMTSP : NV2.14418	0.144452	6.25	10	pSC.PGC.Mitotic.1_AdultSubset
NvMfap4-1 : NV2.7038	0	0	7	pSC.PGC.Mitotic.1_AdultSubset
NvMfap4-2 : NV2.25470	0	0	7	pSC.PGC.Mitotic.1_AdultSubset
NvMfap4-3 : NV2.16067	0	0	7	pSC.PGC.Mitotic.1_AdultSubset
NvMfap4-4 : NV2.25464	0	0	7	pSC.PGC.Mitotic.1_AdultSubset
NvMfap4-5 : NV2.5873	0	0	5	pSC.PGC.Mitotic.1_AdultSubset
NvMfap4-6 : NV2.8818	0	0	7	pSC.PGC.Mitotic.1_AdultSubset
NvMfap4-7 : NV2.17967	0	0	7	pSC.PGC.Mitotic.1_AdultSubset
NvMfap1 : NV2.13515	0.292428	10.4167	9	pSC.PGC.Mitotic.1_AdultSubset
NvNetr : NV2.7734	0	0	6	pSC.PGC.Mitotic.1_AdultSubset
NvNid : NV2.20722	0.0254873	2.08333	6	pSC.PGC.Mitotic.1_AdultSubset
NvNtA : NV2.12221	0	0	6	pSC.PGC.Mitotic.1_AdultSubset
NvOto-like-1 : NV2.6495	0	0	7	pSC.PGC.Mitotic.1_AdultSubset
NvPtx-1 : NV2.18957	0	0	7	pSC.PGC.Mitotic.1_AdultSubset
NvPtx-2 : NV2.3861	0	0	7	pSC.PGC.Mitotic.1_AdultSubset
NvPtx-related : NV2.23776	0	0	7	pSC.PGC.Mitotic.1_AdultSubset
NvPostn : NV2.20449	0	0	6	pSC.PGC.Mitotic.1_AdultSubset
NvPxdn : NV2.13306	0	0	7	pSC.PGC.Mitotic.1_AdultSubset
NvPika : NV2.707	0	0	6	pSC.PGC.Mitotic.1_AdultSubset
NvPolydom-like-1 : NV2.3561	0	0	7	pSC.PGC.Mitotic.1_AdultSubset
NvPolydom-like-2 : NV2.2755	0	0	7	pSC.PGC.Mitotic.1_AdultSubset
NvPolydom-like-3 : NV2.2824	0	0	7	pSC.PGC.Mitotic.1_AdultSubset
NvPolydom-like-4 : NV2.13340	0	0	7	pSC.PGC.Mitotic.1_AdultSubset
NvPolydom-related : NV2.11255	0	0	7	pSC.PGC.Mitotic.1_AdultSubset
NvPolydom1 : NV2.3792	0.0226844	2.08333	7	pSC.PGC.Mitotic.1_AdultSubset
NvPolydom2 : NV2.3300	0	0	7	pSC.PGC.Mitotic.1_AdultSubset
NvPolydom3 : NV2.3560	0	0	7	pSC.PGC.Mitotic.1_AdultSubset
NvProFnt : NV2.24561	0	0	7	pSC.PGC.Mitotic.1_AdultSubset
NvCFP-1 : NV2.23465	2.24813	22.9167	19	pSC.PGC.Mitotic.1_AdultSubset
NvCFP-10 : NV2.17239	0	0	7	pSC.PGC.Mitotic.1_AdultSubset
NvCFP-11 : NV2.17421	0.0567666	2.08333	9	pSC.PGC.Mitotic.1_AdultSubset
NvCFP-12 : NV2.19412	0	0	6	pSC.PGC.Mitotic.1_AdultSubset
NvCFP-13 : NV2.23447	0	0	5	pSC.PGC.Mitotic.1_AdultSubset
NvCFP-14 : NV2.24746	0	0	7	pSC.PGC.Mitotic.1_AdultSubset
NvCFP-15 : NV2.25346	0	0	6	pSC.PGC.Mitotic.1_AdultSubset
NvCFP-2 : NV2.15937	0	0	7	pSC.PGC.Mitotic.1_AdultSubset
NvCFP-3 : NV2.10038	0.356873	4.16667	8	pSC.PGC.Mitotic.1_AdultSubset
NvCFP-4 : NV2.11945	0	0	7	pSC.PGC.Mitotic.1_AdultSubset
NvCFP-5 : NV2.13338	0	0	7	pSC.PGC.Mitotic.1_AdultSubset
NvCFP-6 : NV2.13919	0.309893	14.5833	9	pSC.PGC.Mitotic.1_AdultSubset
NvCFP-7 : NV2.13920	0.192194	8.33333	11	pSC.PGC.Mitotic.1_AdultSubset
NvCFP-8 : NV2.15932	0	0	7	pSC.PGC.Mitotic.1_AdultSubset
NvCFP-9 : NV2.15933	0	0	7	pSC.PGC.Mitotic.1_AdultSubset
NvCrumbsh-1 : NV2.25658	0	0	6	pSC.PGC.Mitotic.1_AdultSubset
NvCrumbsh-2 : NV2.25685	0.0567666	2.08333	8	pSC.PGC.Mitotic.1_AdultSubset
NvEys : NV2.6047	0	0	5	pSC.PGC.Mitotic.1_AdultSubset
NvSAMEGF : NV2.2046	0	0	6	pSC.PGC.Mitotic.1_AdultSubset
NvSCP-TSP-1 : NV2.17517	0	0	7	pSC.PGC.Mitotic.1_AdultSubset
NvSCP-TSP-2 : NV2.17827	0	0	7	pSC.PGC.Mitotic.1_AdultSubset
NvSPARC-related : NV2.11433	0	0	7	pSC.PGC.Mitotic.1_AdultSubset
NvSPARC : NV2.21613	0.0270774	2.08333	7	pSC.PGC.Mitotic.1_AdultSubset
NvCUB-EGF : NV2.18054	0	0	7	pSC.PGC.Mitotic.1_AdultSubset
NvSlit-like-1 : NV2.7952	0.248982	6.25	20	pSC.PGC.Mitotic.1_AdultSubset
NvSlit-like-2 : NV2.12458	0	0	7	pSC.PGC.Mitotic.1_AdultSubset
NvSlit-like-3 : NV2.20861	0	0	7	pSC.PGC.Mitotic.1_AdultSubset
NvSushi-1 : NV2.25124	0	0	7	pSC.PGC.Mitotic.1_AdultSubset
NvSushi-2 : NV2.25727	0	0	6	pSC.PGC.Mitotic.1_AdultSubset
NvSushi-3 : NV2.25725	0	0	7	pSC.PGC.Mitotic.1_AdultSubset
NvSushi-4 : NV2.24979	0.0270774	2.08333	7	pSC.PGC.Mitotic.1_AdultSubset
NvSushi-6 : NV2.24371	0.24415	8.33333	7	pSC.PGC.Mitotic.1_AdultSubset
NvSushiTSP : NV2.15519	0.0254873	2.08333	8	pSC.PGC.Mitotic.1_AdultSubset
NvTSR : NV2.14919	0	0	7	pSC.PGC.Mitotic.1_AdultSubset
NvTSPd-3 : NV2.17583	0	0	7	pSC.PGC.Mitotic.1_AdultSubset
NvTSRDisc : NV2.10387	0	0	7	pSC.PGC.Mitotic.1_AdultSubset
NvTSR-1 : NV2.737	0	0	7	pSC.PGC.Mitotic.1_AdultSubset
NvTSR-2 : NV2.2780	0	0	7	pSC.PGC.Mitotic.1_AdultSubset
NvTSR-3 : NV2.3202	0	0	7	pSC.PGC.Mitotic.1_AdultSubset
NvTens : NV2.23274	0	0	6	pSC.PGC.Mitotic.1_AdultSubset
NvTSP-1 : NV2.23884	0.0552608	2.08333	8	pSC.PGC.Mitotic.1_AdultSubset
NvTSP-2 : NV2.23886	0.230457	2.08333	14	pSC.PGC.Mitotic.1_AdultSubset
NvThyrd : NV2.17626	0	0	7	pSC.PGC.Mitotic.1_AdultSubset
NvThyr-1 : NV2.14419	0	0	7	pSC.PGC.Mitotic.1_AdultSubset
NvThyr-2 : NV2.14040	0	0	7	pSC.PGC.Mitotic.1_AdultSubset
NvThyr-3 : NV2.19319	0.366214	12.5	7	pSC.PGC.Mitotic.1_AdultSubset
NvTGFbIP-1 : NV2.3437	0	0	7	pSC.PGC.Mitotic.1_AdultSubset
NvTGFbIP-2 : NV2.2361	0.0279192	2.08333	6	pSC.PGC.Mitotic.1_AdultSubset
NvUsh : NV2.20013	0	0	6	pSC.PGC.Mitotic.1_AdultSubset
NvUsh-like : NV2.20014	0.0677727	2.08333	10	pSC.PGC.Mitotic.1_AdultSubset
NvvWFA-WAP : NV2.11346	0	0	6	pSC.PGC.Mitotic.1_AdultSubset
NvLamA2 : NV2.15818	0.0315084	2.08333	7	pSC.PGC.Mitotic.1_AdultSubset
NvvWFAPA : NV2.3759	0	0	7	pSC.PGC.Mitotic.1_AdultSubset
NvvWFA-WSC : NV2.21576	0	0	7	pSC.PGC.Mitotic.1_AdultSubset
NvPolyvWFA : NV2.8635	0	0	7	pSC.PGC.Mitotic.1_AdultSubset
NvvWFA-TSR : NV2.14005	0	0	7	pSC.PGC.Mitotic.1_AdultSubset
NvvWFA-10 : NV2.9760	0	0	7	pSC.PGC.Mitotic.1_AdultSubset
NvvWFA-11 : NV2.9856	0.0995455	4.16667	11	pSC.PGC.Mitotic.1_AdultSubset
NvvWFA-12 : NV2.10017	0	0	7	pSC.PGC.Mitotic.1_AdultSubset
NvvWFA-13 : NV2.10983	0.322286	6.25	10	pSC.PGC.Mitotic.1_AdultSubset
NvvWFA-14 : NV2.11796	0.339252	10.4167	9	pSC.PGC.Mitotic.1_AdultSubset
NvvWFA-15 : NV2.14073	0	0	7	pSC.PGC.Mitotic.1_AdultSubset
NvvWFA-16 : NV2.14625	0	0	7	pSC.PGC.Mitotic.1_AdultSubset
NvvWFA-17 : NV2.19051	0.313569	8.33333	10	pSC.PGC.Mitotic.1_AdultSubset
NvvWFA-18 : NV2.20167	0.0287833	2.08333	11	pSC.PGC.Mitotic.1_AdultSubset
NvvWFA-19 : NV2.20559	0	0	7	pSC.PGC.Mitotic.1_AdultSubset
NvvWFA-2 : NV2.10551	0	0	7	pSC.PGC.Mitotic.1_AdultSubset
NvvWFA-20 : NV2.20560	0	0	7	pSC.PGC.Mitotic.1_AdultSubset
NvvWFA-21 : NV2.21578	0	0	7	pSC.PGC.Mitotic.1_AdultSubset
NvvWFA-22 : NV2.24204	0	0	7	pSC.PGC.Mitotic.1_AdultSubset
NvvWFA-23 : NV2.24227	0	0	7	pSC.PGC.Mitotic.1_AdultSubset
NvvWFA-24 : NV2.24228	0	0	7	pSC.PGC.Mitotic.1_AdultSubset
NvvWFA-3 : NV2.14076	0	0	7	pSC.PGC.Mitotic.1_AdultSubset
NvvWFA-4 : NV2.14087	0	0	7	pSC.PGC.Mitotic.1_AdultSubset
NvvWFA-5 : NV2.1044	0	0	7	pSC.PGC.Mitotic.1_AdultSubset
NvvWFA-6 : NV2.1047	0	0	7	pSC.PGC.Mitotic.1_AdultSubset
NvvWFA-7 : NV2.8413	0	0	7	pSC.PGC.Mitotic.1_AdultSubset
NvvWFA-8 : NV2.8558	0.0284686	2.08333	7	pSC.PGC.Mitotic.1_AdultSubset
NvvWFA-9 : NV2.8618	0.967444	4.16667	9	pSC.PGC.Mitotic.1_AdultSubset
NvvWFA-EGF-Disc-1 : NV2.855	0.445803	8.33333	14	pSC.PGC.Mitotic.1_AdultSubset
NvvWFA-EGF-Disc-2 : NV2.857	0	0	7	pSC.PGC.Mitotic.1_AdultSubset
NvvWFA-EGF-Disc-3 : NV2.861	0	0	7	pSC.PGC.Mitotic.1_AdultSubset
NvvWFD-1 : NV2.9287	0.600766	6.25	13	pSC.PGC.Mitotic.1_AdultSubset
NvvWFD-2 : NV2.21786	0	0	7	pSC.PGC.Mitotic.1_AdultSubset
NvHspg : NV2.14905	0	0	7	pSC.PGC.Mitotic.1_AdultSubset
NvBcan-like : NV2.12169	0	0	7	pSC.PGC.Mitotic.1_AdultSubset
NvCspd-like : NV2.11760	0	0	7	pSC.PGC.Mitotic.1_AdultSubset
NvLecc-like-1 : NV2.22624	0	0	7	pSC.PGC.Mitotic.1_AdultSubset
NvLecc-like-2 : NV2.22626	0	0	7	pSC.PGC.Mitotic.1_AdultSubset
NvPlc : NV2.14907	0	0	7	pSC.PGC.Mitotic.1_AdultSubset
NvPlc-like : NV2.14904	0	0	7	pSC.PGC.Mitotic.1_AdultSubset
NvPG-like : NV2.22783	0.22519	4.16667	10	pSC.PGC.Mitotic.1_AdultSubset
NvVers : NV2.25674	0	0	7	pSC.PGC.Mitotic.1_AdultSubset
NvADAM-1 : NV2.24729	0.341481	14.5833	11	pSC.PGC.Mitotic.1_AdultSubset
NvADAM-2 : NV2.6771	0.045458	4.16667	7	pSC.PGC.Mitotic.1_AdultSubset
NvADAM-3 : NV2.13893	0.463312	16.6667	10	pSC.PGC.Mitotic.1_AdultSubset
NvADAM-4 : NV2.18385	0.0226844	2.08333	7	pSC.PGC.Mitotic.1_AdultSubset
NvADAM-like : NV2.20818	0	0	7	pSC.PGC.Mitotic.1_AdultSubset
NvADAMTS-1 : NV2.22459	0	0	7	pSC.PGC.Mitotic.1_AdultSubset
NvADAMTS-10 : NV2.21229	0	0	7	pSC.PGC.Mitotic.1_AdultSubset
NvADAMTS-11 : NV2.21230	0	0	7	pSC.PGC.Mitotic.1_AdultSubset
NvADAMTS-12 : NV2.21636	0	0	7	pSC.PGC.Mitotic.1_AdultSubset
NvADAMTS-13 : NV2.21638	0	0	7	pSC.PGC.Mitotic.1_AdultSubset
NvADAMTS-14 : NV2.22465	0	0	7	pSC.PGC.Mitotic.1_AdultSubset
NvADAMTS-15 : NV2.25184	0	0	7	pSC.PGC.Mitotic.1_AdultSubset
NvADAMTS-2 : NV2.17494	0.230457	2.08333	9	pSC.PGC.Mitotic.1_AdultSubset
NvADAMTS-3 : NV2.24253	0	0	6	pSC.PGC.Mitotic.1_AdultSubset
NvADAMTS-4 : NV2.9914	0	0	7	pSC.PGC.Mitotic.1_AdultSubset
NvADAMTS-5 : NV2.1123	0.0977954	6.25	9	pSC.PGC.Mitotic.1_AdultSubset
NvADAMTS-6 : NV2.1120	0	0	5	pSC.PGC.Mitotic.1_AdultSubset
NvADAMTS-7 : NV2.88	0	0	7	pSC.PGC.Mitotic.1_AdultSubset
NvADAMTS-8 : NV2.1124	0	0	7	pSC.PGC.Mitotic.1_AdultSubset
NvADAMTS-9 : NV2.17536	0	0	7	pSC.PGC.Mitotic.1_AdultSubset
NvADAMTS13-related : NV2.18541	0	0	7	pSC.PGC.Mitotic.1_AdultSubset
NvADAMTS-17 : NV2.23275	0	0	7	pSC.PGC.Mitotic.1_AdultSubset
NvADAMTS-18 : NV2.20821	0	0	6	pSC.PGC.Mitotic.1_AdultSubset
NvADAMTS-19 : NV2.87	0	0	6	pSC.PGC.Mitotic.1_AdultSubset
NvADAMTS-20 : NV2.22999	0	0	7	pSC.PGC.Mitotic.1_AdultSubset
NvADAMTS-21 : NV2.24070	0	0	6	pSC.PGC.Mitotic.1_AdultSubset
NvNaglu : NV2.4033	0.0594898	2.08333	20	pSC.PGC.Mitotic.1_AdultSubset
NvAstacin-10 : NV2.23064	0.0517907	4.16667	9	pSC.PGC.Mitotic.1_AdultSubset
NvAstacin-11 : NV2.4041	0	0	7	pSC.PGC.Mitotic.1_AdultSubset
NvAstacin-12 : NV2.21687	0	0	7	pSC.PGC.Mitotic.1_AdultSubset
NvAstacin-13 : NV2.18310	0	0	7	pSC.PGC.Mitotic.1_AdultSubset
NvAstacin-14 : NV2.18077	0	0	7	pSC.PGC.Mitotic.1_AdultSubset
NvAstacin-15 : NV2.3279	0	0	7	pSC.PGC.Mitotic.1_AdultSubset
NvAstacin-16 : NV2.3953	0	0	7	pSC.PGC.Mitotic.1_AdultSubset
NvAstacin-17 : NV2.5152	0	0	6	pSC.PGC.Mitotic.1_AdultSubset
NvAstacin-18 : NV2.8552	0.0677727	2.08333	9	pSC.PGC.Mitotic.1_AdultSubset
NvAstacin-19 : NV2.10155	0	0	7	pSC.PGC.Mitotic.1_AdultSubset
NvAstacin-1 : NV2.16729	0	0	7	pSC.PGC.Mitotic.1_AdultSubset
NvAstacin-2 : NV2.24546	0.0855578	2.08333	6	pSC.PGC.Mitotic.1_AdultSubset
NvAstacin-20 : NV2.11168	0	0	7	pSC.PGC.Mitotic.1_AdultSubset
NvAstacin-21 : NV2.11169	0	0	7	pSC.PGC.Mitotic.1_AdultSubset
NvAstacin-22 : NV2.11270	0	0	7	pSC.PGC.Mitotic.1_AdultSubset
NvAstacin-23 : NV2.13964	0	0	7	pSC.PGC.Mitotic.1_AdultSubset
NvAstacin-24 : NV2.14830	0	0	7	pSC.PGC.Mitotic.1_AdultSubset
NvAstacin-25 : NV2.15018	0	0	7	pSC.PGC.Mitotic.1_AdultSubset
NvAstacin-26 : NV2.17332	0	0	7	pSC.PGC.Mitotic.1_AdultSubset
NvAstacin-27 : NV2.17973	0	0	6	pSC.PGC.Mitotic.1_AdultSubset
NvAstacin-28 : NV2.18104	0	0	7	pSC.PGC.Mitotic.1_AdultSubset
NvAstacin-29 : NV2.21385	0	0	7	pSC.PGC.Mitotic.1_AdultSubset
NvAstacin-3 : NV2.10250	0	0	7	pSC.PGC.Mitotic.1_AdultSubset
NvAstacin-4 : NV2.13745	0	0	7	pSC.PGC.Mitotic.1_AdultSubset
NvAstacin-5 : NV2.2486	0	0	7	pSC.PGC.Mitotic.1_AdultSubset
NvAstacin-6 : NV2.15011	0	0	7	pSC.PGC.Mitotic.1_AdultSubset
NvAstacin-7 : NV2.19110	0	0	7	pSC.PGC.Mitotic.1_AdultSubset
NvAstacin-8 : NV2.5141	0.357906	6.25	13	pSC.PGC.Mitotic.1_AdultSubset
NvAstacin-9 : NV2.2433	0	0	6	pSC.PGC.Mitotic.1_AdultSubset
NvAstacin-like-1 : NV2.14828	0.148714	4.16667	7	pSC.PGC.Mitotic.1_AdultSubset
NvAstacin-like-2 : NV2.8027	0	0	7	pSC.PGC.Mitotic.1_AdultSubset
NvBMP/Toll-1 : NV2.25693	0	0	6	pSC.PGC.Mitotic.1_AdultSubset
NvBMP/Toll-2 : NV2.25692	0.0232049	2.08333	8	pSC.PGC.Mitotic.1_AdultSubset
NvCoag-like 1 : NV2.19953	0	0	7	pSC.PGC.Mitotic.1_AdultSubset
NvCoag-like 2 : NV2.1113	0	0	7	pSC.PGC.Mitotic.1_AdultSubset
NvCoag-like 3 : NV2.19396	0	0	7	pSC.PGC.Mitotic.1_AdultSubset
NvCoag-like 4 : NV2.1635	0	0	7	pSC.PGC.Mitotic.1_AdultSubset
NvCoag-like 5 : NV2.3648	0	0	7	pSC.PGC.Mitotic.1_AdultSubset
NvCoag-like 6 : NV2.19400	0	0	7	pSC.PGC.Mitotic.1_AdultSubset
NvCoag-related 1 : NV2.14492	0	0	7	pSC.PGC.Mitotic.1_AdultSubset
NvCoag-related 2 : NV2.581	0	0	6	pSC.PGC.Mitotic.1_AdultSubset
NvCoag-related 3 : NV2.593	0.0397886	2.08333	20	pSC.PGC.Mitotic.1_AdultSubset
NvCoag-related 4 : NV2.1284	0	0	7	pSC.PGC.Mitotic.1_AdultSubset
NvCystat-1 : NV2.8996	0.410931	20.8333	6	pSC.PGC.Mitotic.1_AdultSubset
NvCystat-2 : NV2.12344	0.493108	14.5833	9	pSC.PGC.Mitotic.1_AdultSubset
NvCystat-3 : NV2.17628	2.15696	52.0833	11	pSC.PGC.Mitotic.1_AdultSubset
NvCRELD2 : NV2.1170	0.139332	4.16667	5	pSC.PGC.Mitotic.1_AdultSubset
NvHspe-1 : NV2.17717	0	0	6	pSC.PGC.Mitotic.1_AdultSubset
NvHspe-2 : NV2.18651	0	0	7	pSC.PGC.Mitotic.1_AdultSubset
NvHyal-1 : NV2.14428	0	0	6	pSC.PGC.Mitotic.1_AdultSubset
NvHyal-2 : NV2.14444	0.0732392	4.16667	12	pSC.PGC.Mitotic.1_AdultSubset
NvIGFKz : NV2.6476	0	0	6	pSC.PGC.Mitotic.1_AdultSubset
NvItih : NV2.22463	0.363437	14.5833	10	pSC.PGC.Mitotic.1_AdultSubset
NvItih-hC : NV2.15230	0	0	6	pSC.PGC.Mitotic.1_AdultSubset
NvKSI : NV2.14070	0	0	7	pSC.PGC.Mitotic.1_AdultSubset
NvKusi-1 : NV2.10172	0.723435	20.8333	7	pSC.PGC.Mitotic.1_AdultSubset
NvKusi-2 : NV2.320	0.0436026	2.08333	8	pSC.PGC.Mitotic.1_AdultSubset
NvKusi-3 : NV2.3373	1.02168	22.9167	10	pSC.PGC.Mitotic.1_AdultSubset
NvKusi-4 : NV2.21204	0.0287833	2.08333	7	pSC.PGC.Mitotic.1_AdultSubset
NvLDTFM : NV2.20815	0.256946	6.25	15	pSC.PGC.Mitotic.1_AdultSubset
NvLox : NV2.19165	0	0	7	pSC.PGC.Mitotic.1_AdultSubset
NvLox2-like : NV2.19166	0	0	6	pSC.PGC.Mitotic.1_AdultSubset
NvM28MMP : NV2.13120	0.390808	8.33333	12	pSC.PGC.Mitotic.1_AdultSubset
NvMASP : NV2.3735	0	0	6	pSC.PGC.Mitotic.1_AdultSubset
NvMMP-2 : NV2.20474	0.806385	10.4167	8	pSC.PGC.Mitotic.1_AdultSubset
NvMMP-3 : NV2.807	0.0542706	4.16667	7	pSC.PGC.Mitotic.1_AdultSubset
NvMMP-4 : NV2.10833	0	0	7	pSC.PGC.Mitotic.1_AdultSubset
NvMMP-5 : NV2.14297	0	0	7	pSC.PGC.Mitotic.1_AdultSubset
NvMMP-6 : NV2.1647	0	0	7	pSC.PGC.Mitotic.1_AdultSubset
NvMMP-7 : NV2.3582	0	0	8	pSC.PGC.Mitotic.1_AdultSubset
[truncated: 251,152+ more rows]
