# Supplementary material for: Molecular dynamics of the matrisome across sea anemone life history
Source: eLife. 2025 Oct 23;14:RP105319. doi: 10.7554/eLife.105319 (PMC12549020; doi:10.7554/eLife.105319)
Supplement: Supplementary file 6. — Related to Figure 3. [file elife-105319-supp6.xlsx]

## Sheet: AllCnidocyteECMGenesSorted
Supplementary file 6. Matrix of average expression values for all cnidocyte-specific genes (rows) across all cell state identities in Cole et al. 2024 Frontiers in Zoology (columns). Related to Fig. 3.
	pSC.PGC.Mitotic.1	pSC.PGC.Mitotic.2	pSC.PGC.NPC	pSC.PGC.NPC.g	pSC.PGC.PGC	pSC.PGC.primary.oocyte	pSC.PGC.spermatagonia	pSC.PGC.maturing.sperm	pSC.PGC.maturing.sperm.2	neurogland.all.S1.L1	neurogland.all.N1.L1	neurogland.all.N1.L2	neurogland.all.N1.L3	neurogland.all.N1.g.early	neurogland.all.N1.g1	neurogland.all.N1.g2	neurogland.all.N1.g3	neurogland.all.N1.g4	neurogland.all.N1.g5	neurogland.all.N1.early.1	neurogland.all.N1.early.2	neurogland.all.N1.1	neurogland.all.N1.2	neurogland.all.N1.3	neurogland.all.N1.4	neurogland.all.N1.5	neurogland.all.N1.6	neurogland.all.N1S.1	neurogland.all.N1S.2	neurogland.all.N1S.3	neurogland.all.N1S.4.early	neurogland.all.N1S.4	neurogland.all.NGD.early	neurogland.all.NGD.1	neurogland.all.SGD.early	neurogland.all.S1.1	neurogland.all.S1.2	neurogland.all.S2.tll.1	neurogland.all.S2.tll.2	neurogland.all.S2.tll.3	neurogland.all.S2.tll.4	neurogland.all.GD.1	neurogland.all.GD.2	neurogland.all.GD.3	neurogland.all.GD.4	neurogland.all.GD.5	neurogland.all.S3	neurogland.all.N2.g1	neurogland.all.N2.1
NvAeGly-1 : NV2.23295	0.00669598	0.000615748	0.00106192	0	0	0	0	0	0.0262022	0.00662575	0	0	0	0	0	0.0203998	0	0	0	0.0501494	0	0.121582	0.020633	0	0	0.0795049	0.0369979	0	0.29134	0	0.109135	0.0302413	0	0	0.0162743	0	0.00866873	0	0.0166379	0.237429	0	0	0	0	0.0166453	0	0	0.00892237	0.0589178
NvCFP-2 : NV2.15937	0.000224927	0	0.000275964	0.00257753	0	0	0	0	0	0	0	0.00177427	0	0	0	0	0	0	0	0	0	0.00662597	0.0860882	0	0	0	0	0	0	0	0	0.00408802	0	0	0.019001	0.0265846	0	0.00486334	0	0	0	0	0	0	0	0	0	0	0
NvComplC : NV2.11502	0.000824799	0	0.00144787	0	0	0	0	0	0	0	0	0	0.00463492	0	0	0	0.0249235	0	0	0.0104838	0	0.00880207	0	0	0	0	0	0	0.00641466	0	0	0	0	0	0.00190372	0	0	0.0208292	0.00377204	0	0	0	0	0.00123829	0	0.00640523	0	0	0
NvCTLD-2 : NV2.18171	0	0	0	0	0	0	0	0	0	0	0	0	0	0	0	0	0	0	0	0	0	0	0	0	0	0	0	0	0	0	0	0	0	0	0	0	0	0	0	0	0	0.00231357	0	0	0	0	0	0	0
NvCykR-15 : NV2.12582	0	0.00199587	0.00423191	0.0154431	0	0	0.00212885	0.0990622	0	0	0	0.0892537	0	0	0	0.0181839	0	0	0	0	0	0.00137397	0	0.0212598	0	0	0.00559137	0	0	0	0	0	0	0.116043	0.00236913	0	0	0	0.00936974	0	0	0	0	0	0	0	0	0.00892237	0.102709
NvFp-like-9 : NV2.13189	0.00145853	0.00155559	0.00316454	0	0	0	0	0	0.00513909	0	0	0	0	0	0	0	0	0	0	0	0	0	0	0	0	0	0	0	0	0	0	0	0	0	0.00126062	0	0	0	0	0	0	0	0	0	0	0	0	0	0.0439168
NvFREP-14 : NV2.25466	0	0	0.000670962	0	0	0	0	0	0	0	0	0	0	0	0	0	0	0	0	0	0	0	0	0	0	0	0	0	0	0	0	0	0	0	0	0	0	0	0	0	0	0	0	0	0	0	0	0.00892237	0
NvFREP-19 : NV2.4753	0.00106052	0	0.000614003	0.00565788	0.0159917	0	0.00437161	0	0	0.0089902	0	0.0138045	0	0	0	0	0	0	0	0	0.0217857	0.0285666	0	0	0	0	0	0	0.0305938	0	0	0.00271568	0	0	0.0019592	0	0	0	0.0198436	0	0	0	0	0	0	0	0	0	0.0530559
NvFREP-21 : NV2.6010	0	0	0.000366007	0.000251695	0	0	0	0	0	0	0	0	0	0	0	0	0	0	0	0	0	0.00376759	0	0.0353472	0	0	0.0810356	0	0.0381843	0	0	0	0	0	0.00178863	0	0	0	0	0	0	0	0	0	0	0	0	0.0524951	0.246436
NvFREP-24 : NV2.11287	0	0	0.00317725	0.00093619	0	0	0	0	0	0	0	0	0	0	0	0	0	0	0	0	0.0154651	0	0	0.0140496	0	0	0.00700971	0	0	0	0	0	0	0	0.000522676	0	0	0.00136077	0.006939	0	0	0	0	0	0	0	0	0.00892237	0
NvFREP-25 : NV2.12036	0.000984846	0.000968793	0.00142935	0.0041061	0	0	0	0	0.0981525	0	0.0386081	0.015469	0.0192869	0	0	0	0	0	0	0	0	0	0	0	0	0	0	0	0	0	0	0.00184168	0	0	0.00548204	0	0	0	0	0	0	0	0	0	0	0	0	0.00892237	0.077499
NvFREP-29 : NV2.11749	0.00150005	0.00489695	0	0.0015021	0	0	0	0	0	0	0.0116814	0.00810912	0	0	0	0	0	0	0	0	0	0.0125814	0	0.0634792	0	0	0	0	0	0	0	0	0	0	0.017445	0.00498602	0	0.00530637	0.00468487	0.0164649	0	0	0	0	0	0	0	0.071379	0
NvFREP-6 : NV2.24867	0	0.00147646	0.000710759	0	0	0	0	0	0	0.021529	0.00578609	0.0754495	0	0	0	0.0203998	0	0	0	0	0.00249295	0	0	0	0	0	0.00797212	0.00891862	0	0	0	0	0	0	0.00349937	0	0	0.00414837	0.0976054	0	0	0.00728231	0.00937678	0	0.000830759	0	0	0	0.142682
NvIhh : NV2.23188	0.0358338	0.0179347	0.0157537	0.0176003	0	0.0500711	0.00528365	0	0	0	0.0828359	0.0480363	0.0168318	0.0647599	0.0303314	0	0.00503736	0	0.145189	0.0143756	0.00504893	0.0241662	0.0624376	0.0353479	0	0	0.0225539	0.0235888	0	0	0	0	0.0614066	0.0949073	0.0156288	0.013371	0	0.00651418	0	0	0	0.0172169	0	0.00123829	0.00831151	0	0	0.0029113	0
NvIntL-like-1 : NV2.7079	0.00489205	0.0173977	0.0258231	0.0072207	0	0	0.0176508	0	0	0	0.0096994	0.0122945	0.0228485	0.0112609	0	0	0.0229152	0	0	0	0.00955888	0.0398359	0	0	0	0	0.0177659	0	0.030161	0	0	0	0.0301305	0	0.00704606	0	0.00930593	0.0322215	0.00271874	0	0	0	0.00529242	0.0249252	0.0725459	0	0.0496978	0.00443231	0
NvLamA1 : NV2.24158	0	0	0.00116571	0	0	0	0	0	0	0	0	0	0	0	0	0	0.0196483	0	0	0	0.0509242	0	0	0	0.0427614	0	0	0	0	0	0	0	0	0	0	0	0	0	0	0	0	0	0	0	0	0	0	0	0
NvPALec-1 : NV2.18114	0.00528569	0	0.00301966	0.000847782	0	0	0	0	0	0	0	0.00300218	0	0	0	0	0.0548224	0	0	0	0.00787364	0	0.00511933	0	0	0.0463109	0	0	0	0	0	0	0.012377	0	0.00435416	0	0	0	0.00936974	0	0	0	0	0	0	0	0	0.0356895	0
NvPAN-2 : NV2.7825	0.000537265	0.00389745	0.00122264	0.000670234	0	0	0.0161741	0.115371	0	0	0.00548253	0.184971	0	0.0466315	0	0	0	0	0	0	0	0.0559066	0.110327	0.105621	0	0	0	0	0	0	0	0.00953454	0	0	0.0205172	0	0.0183597	0	0	0	0	0.00231357	0	0	0.00164951	0	0	0.0178447	0.0776259
NvPAN-App-EGF-1 : NV2.5576	0.00196495	0.000772919	0.00253902	0.00135636	0	0	0.0123512	0	0	0.0334478	0	0.00811071	0	0	0.018997	0	0.0073035	0	0	0.0320025	0.0993616	0.0520005	0	0	0.20905	0.115056	0.039839	0	0.00266648	0	0	0.0238164	0.0419428	0.050373	0.0114418	0.0638351	0.0792367	0.00594941	0.00730066	0.00414861	0	0	0.00991975	0	0	0	0	0.0178447	0.318265
NvPAN-App-EGF-2 : NV2.20124	0.00238873	0.0119382	0.00934652	0.0168884	0	0	0.00100109	0	0.0293993	0.0408878	0.00937873	0.0297531	0.0563503	0.0120494	0.113232	0	0	0	0	0.443924	0	0	0.617279	0.0307732	2.19034	1.55072	1.08929	0.0260347	1.44942	0	0	0.0254723	0.00732252	0	0.148559	0	0	0.483636	1.12108	6.08607	0	1.4794	0.0103534	0	0	0	0.599189	0.0731743	0.680439
NvPTypP-related : NV2.11797	0.0209706	0.0151858	0.0089552	0.0115113	0.0270253	0	0.0453171	0.0176655	0	0	0.0195755	0.00343756	0.00899073	0	0	0	0	0	0	0	0.033687	0	0.00902772	0.029157	0	0	0	0.0113456	0	0	0	0	0	0	0.0315484	0.0051535	0	0	0.00468487	0.014899	0	0	0.0112492	0.00624369	0	0	0	0.00405013	0.0739718
NvPTypPF-like : NV2.12583	0.00251828	0	0.000374087	0	0	0	0.0128164	0.213348	0.045432	0.0623527	0	0.0245434	0.00146606	0	0	0	0.00641349	0	0	0	0	0	0	0	0	0	0	0.0266086	0	0	0	0.0189466	0	0	0.0387726	0	0	0	0	0	0	0	0	0	0	0	0	0.00892237	0.102534
NvTSR-SEA-2 : NV2.19022	0	0	0	0	0	0	0	0	0	0	0	0.00589036	0	0	0	0	0	0	0	0	0.0119064	0	0	0	0.0280804	0	0	0	0.0139428	0	0	0	0	0	0.00477217	0.0279455	0.00909652	0	0	0	0.0216657	0	0	0.0039127	0	0	0	0.00145565	0.051648
NvADAMTS-15 : NV2.25184	0.000896014	0.0033862	0.00504197	0.0028701	0	0.161249	0.0136147	0.0125157	0.0362447	0	0	0.00631855	0.00146606	0.0962742	0	0	0.0259066	0	0	0.0198128	0.00609772	0	0	0.0507488	0	0	0.0104682	0	0.00988299	0	0	0	0	0	0.00188265	0.0219407	0	0	0	0	0	0	0	0	0.00327847	0	0.00560881	0	0.0177299
NvAstacin-13 : NV2.18310	0.0107672	0.00345828	0.0203355	0.0242068	0	0	0	0	0	0	0.00523075	0	0	0	0	0	0	0.0247598	0	0	0	0.045083	0	0	0	0	0	0	0	0	0	0	0.01481	0	0.00284665	0.0467613	0	0	0	0	0	0	0.00528445	0.0342973	0	0	0	0.00439286	0
NvAstacin-14 : NV2.18077	0.00164438	0.00907211	0.00957125	0.0104204	0	0	0	0	0	0	0.0071648	0.00298463	0	0	0	0	0	0	0.0183092	0	0.00333888	0.0060736	0	0	0	0	0.0477829	0	0	0	0	0	0	0	0.00129415	0	0	0.00622969	0.00114125	0	0	0	0	0.00137323	0	0	0	0	0
NvAstacin-7 : NV2.19110	0.00116538	0.00194134	0.00497755	0.00595005	0	0	0	0	0	0.0191351	0.0047093	0.0336443	0.00358505	0	0	0	0	0	0	0	0.0215233	0.0571093	0.00511933	0.0112654	0	0	0	0.261126	0	0	0.0284667	0.00368337	0	0	0.0372129	0.170558	0	0	0	0.0451711	0	0	0	0	0	0	0	0	0
NvCAdh-like 5 : NV2.21271	0.0124647	0.005749	0.0127467	0.0131518	0.0102225	0	0.00824571	0	0	0.114213	0.0552926	0.0550025	0.0081419	0	0	0	0	0.00732549	0	0.00325881	0	0	0	0	0	0	0.0478826	0	0	0	0	0.00304215	0.00534559	0	0.00201327	0.0492121	0	0	0.00471018	0.00890171	0	0	0	0	0.00345995	0	0	0.00588796	0
NvCapcl-like-1 : NV2.3951	0	0	0	0	0	0	0	0	0	0	0	0	0	0	0	0	0	0	0	0	0	0	0	0	0	0	0	0	0	0	0	0	0	0	0	0	0	0	0	0	0	0	0	0	0	0	0	0	0
NvCapcl-like-2 : NV2.3157	0.000807981	0	0	0.00532082	0	0	0	0	0	0	0	0	0.00422362	0	0	0	0	0	0	0	0.00235874	0	0	0	0	0	0.0060057	0	0.0635719	0	0	0.0307991	0.00849228	0	0.000452169	0	0	0	0	0.0163206	0	0.0167073	0	0	0	0	0	0	0
NvCFP-10 : NV2.17239	0.0211748	0.016212	0.0177405	0.0143758	0.0276861	0	0.0239536	0	0.0883544	0.00748864	0.00280649	0.00615431	0	0.111339	0	0	0	0	0	0.0186056	0.0173842	0	0	0.0318367	0	0	0	0	0.00774541	0	0	0.0156254	0.0248059	0	0.0105863	0.00948069	0.0178427	0.0202816	0.00345548	0.0235791	0	0	0.0297559	0.00341344	0.00318835	0.0203084	0	0.0127364	0
NvCFP-8 : NV2.15932	0.00134698	0.00294051	0.000576885	0	0	0	0	0	0	0	0	0	0	0.140115	0	0	0	0	0	0.0263096	0	0	0	0.00860254	0	0	0	0	0	0	0	0	0	0	0.00144917	0	0	0	0	0	0	0	0	0	0	0	0	0	0
NvCFP-9 : NV2.15933	0.000813948	0	0.00133301	0.00326267	0	0	0	0	0	0.00820982	0	0.0096915	0	0.316938	0	0	0	0	0.128057	0	0	0	0	0	0	0.0190331	0	0	0	0	0.0504221	0.0377843	0	0.0174075	0.00135651	0.0170734	0.00159689	0	0	0	0	0	0	0	0	0	0	0	0
NvCrumbs-like-2 : NV2.6021	0.00166686	0	0.00447715	0	0	0	0	0.0110183	0.0108649	0.109576	0	0	0	0.106542	0	0	0	0	0	0	0.0041366	0.00886882	0	0	0	0	0	0	0	0	0	0	0	0	0.00179753	0	0	0	0	0	0	0	0	0	0.00282434	0	0	0.0449826	0
NvCrumbs-like-3 : NV2.6444	0.00239258	0.00145231	0.00435063	0.0079092	0	0	0.00215146	0	0	0	0.0552926	0.00644644	0.00303936	0	0	0	0.00628307	0.0540237	0	0	0.011323	0.0227602	0.0160108	0.0293155	0	0	0.00242296	0	0	0	0	0.00328088	0	0	0.00867773	0.0455809	0	0.00596901	0	0.0116259	0	0.0060827	0.0734241	0.00895351	0.192948	0.00884718	0	0	0.0744048
NvCTLD-8 : NV2.18585	0.00657252	0.00623802	0.011484	0.0191715	0	0	0	0	0	0	0	0.0446805	0	0.0905622	0	0	0	0	0	0.0115322	0.0133895	0	0	0.0249354	0	0.177809	0	0	0	0	0	0.0125634	0.0402097	0	0.00227146	0.0238606	0	0	0	0	0.0366126	0	0.0114735	0	0.0352599	0	0	0.00475481	0.132528
NvDllR-1 : NV2.5910	0.00370546	0.00297133	0.00325981	0.00965536	0	0	0.00394524	0.0926497	0	0	0	0.0408348	0.0522515	0	0	0	0	0	0	0	0.0149648	0.0299292	0.0191872	0	0	0	0	0	0.0283835	0	0	0.0263234	0.00678514	0	0.0384291	0.035755	0	0.00558617	0.0352979	0	0	0	0.00606442	0.238175	0.315727	0.116281	0	0.0449826	0
NvDSPP : NV2.13059	0.00928864	0.00682014	0.0115966	0.0356525	0	0	0	0	0	0	0.0767554	0.0337112	0	0	0	0	0.00640063	0	0	0	0.00178366	0	0	0	0	0	0	0	0	0	0	0	0.00938086	0.226419	0.0129303	0.0549733	0	0.0211334	0.0141305	0	0	0	0	0	0	0	0.0793512	0.027802	0.00619155
NvEda-like-2 : NV2.22131	0.00103623	0.00267369	0	0	0	0	0	0	0	0	0	0	0	0	0	0	0	0	0	0	0	0	0	0	0	0	0.00978489	0	0.00675873	0	0	0	0	0	0	0	0	0	0	0	0	0	0	0	0	0	0	0	0
NvFnt-3 : NV2.16585	0	0	0.00342533	0.00369152	0	0	0	0.0288317	0	0.842959	0.00745919	0	0.0168023	0	0.0237147	0	0.0529367	0.0198061	0.136528	0.0356313	0.0173871	0	0.0247372	0	0	0	0.00984368	0.0154	0	0	0	0	0	0	0.00393481	0.0108326	0	0	0	0	0	0	0.00222952	0	0	0	0	0	0
NvFnt-ShKT : NV2.20323	0.00584703	0	0	0.00028581	0	0	0	0	0	0	0	0	0	0	0	0	0.0384095	0	0	0	0	0	0	0	0	0	0.071346	0	0	0	0	0	0	0	0.0139363	0	0	0	0	0	0	0	0	0	0	0.0205822	0.0218727	0	0.0208917
NvFp-like-2 : NV2.6439	0	0	0.00200358	0.00175088	0	0	0	0	0	0	0	0	0.020293	0	0	0	0.00503736	0	0	0	0.0152986	0	0	0	0	0	0	0	0	0	0	0	0	0	0	0	0	0	0	0	0	0	0	0	0.00143893	0	0	0	0
NvFp-like-4 : NV2.5916	0.000964097	0	0.000608038	0.000362492	0	0	0	0	0	0.0148212	0	0.0023649	0	0	0	0	0.0124155	0	0	0	0	0	0	0	0	0	0	0	0	0	0	0	0	0	0.0134654	0	0	0	0	0	0	0	0	0	0	0	0	0	0
NvFp-like-5 : NV2.5917	0.00928647	0.00186796	0.00353482	0.00431944	0	0	0	0	0	0	0	0.00618856	0	0	0	0	0.0109986	0	0	0	0.0542956	0.0122593	0	0.00595122	0	0	0	0	0	0	0	0.0501273	0	0	0.0024697	0	0	0	0	0	0	0.0107883	0.00207567	0.00528513	0.0749028	0	0.0144193	0	0.0113769
NvFp-like-6 : NV2.5918	0.00337153	0.00167512	0.000911346	0.000467056	0.0298041	0	0	0	0	0	0.02491	0	0	0	0	0	0	0.130959	0	0	0	0.0503373	0	0	0	0	0.0187537	0	0	0	0	0	0	0.105291	0.00105221	0.00316023	0	0	0	0	0	0	0.0267054	0.00710258	0.0173248	0	0	0.00145565	0
NvFp-like-7 : NV2.6438	0.00361981	0	0.00613563	0	0	0	0	0	0	0	0	0.0222412	0	0	0	0	0.00369044	0.052919	0	0	0	0	0	0.0457231	0.0876086	0	0	0	0	0	0	0	0	0	0.00199884	0.00351884	0	0	0	0.025812	0	0	0	0	0	0	0	0	0
NvFp-like-8 : NV2.6441	0.0231262	0.00179591	0.000816582	0.00975826	0	0	0.00482068	0	0	0	0	0	0	0	0.00757943	0	0.0635681	0	0	0.00978617	0	0.0241795	0	0	0	0	0.0125538	0	0	0	0	0	0	0	0.00645778	0.0110675	0	0	0.00471018	0.0530077	0	0.0174095	0	0.00244976	0.0163707	0	0	0.0652349	0
NvGFR-2 : NV2.13801	0.00263167	0.00761724	0.00406664	0.00203712	0.0158333	0	0.00544087	0.101082	0.0444062	0.0129052	0	0	0	0	0	0	0	0.00732549	0	0.0104838	0.0292306	0	0	0.0127258	0.0690207	0	0.033859	0.00337871	0.0231606	0	0	0.00408802	0.012723	0	0.00128886	0.0274274	0	0.0409195	0	0.00446467	0.0216657	0.0454843	0.00372986	0	0.00497938	0.0812057	0	0	0
NvMANSCR-1 : NV2.5949	0.061835	0.0223472	0.00686302	0.0201192	0.0385582	0	0.0911331	0.043138	0.0511244	0	0.0460532	0.00532282	0	0	0	0	0	0	0	0	0.00276863	0	0	0	0	0	0	0	0	0	0	0.0093377	0	0	0.0113892	0.0161341	0	0	0	0.00266354	0	0	0	0.00909736	0	0	0	0.00145565	0
NvMANSCR-2 : NV2.22155	0.00286614	0.00162202	0	0.000718771	0	0	0.0054079	0	0	0	0	0.0541886	0	0	0	0	0	0	0	0	0.00456127	0	0	0	0	0	0	0	0	0	0	0	0	0	0.0077712	0	0	0	0	0.00266354	0	0	0	0.00137323	0	0	0	0	0
NvNCol-3 : NV2.10686	0.187439	0.195685	0.498875	0.220234	0	0	0.000795722	0	0	0.961988	0.402642	0.562094	0.495103	0.521935	0.274495	0.302626	0.158179	0.320836	0.300067	0.283452	0.410462	0.476751	0.158971	0.187157	0.540025	0.219386	0.55417	0.150919	0.321732	0.202499	0.108202	0.352098	0.207669	0.324924	0.329044	0.696473	0.296145	0.217524	0.20728	0.316306	0.446794	0.377017	0.504602	0.271111	0.153623	0.0790749	0.178747	0.323784	0.377969
NvNCol-7 : NV2.11814	0.0203006	0.015091	0.0228466	0.047245	0	0	0.0064479	0.11053	0.0612648	0.145898	0.132381	0.0356749	0.00162254	0.25628	0	0.00658487	0.0392365	0.141163	0	0.0279925	0.0665744	0.0239071	0.0708545	0	0	0	0.0126069	0	0	0	0	0.0181312	0.0397594	0.0174075	0.0310683	0.120818	0.00159689	0.0228249	0	0.0419481	0	0.0222593	0	0.00155371	0.0550055	0	0	0	0.0597566
NvNCol-like 1 : NV2.363	0.0170012	0.0377256	0.421656	0.179499	0	0	0.00429	0	0	0.37044	0.0774214	0.239688	0.561844	0.233033	0.0881827	0	0.0162074	0	0.0348092	0.121993	0.057742	0.310039	0.0306974	0.0752825	0.0280804	0.155799	0.0678592	0.0358927	0.0866796	0	0.483933	0.330487	0.632024	0.0220909	0.188935	0.0402561	0.0209849	0	0.00743132	0.0254837	0.0398724	0.0633656	0.0368652	0.0368323	0.0522428	0.006761	0	0.253609	0
NvNCol-like 3 : NV2.11816	0.0733352	0.0684092	0.0510338	0.133449	0	0	0	0	0	0.167362	0.162449	0.711101	0.262511	0.187258	0.18739	0.0164186	0.0957895	0	0.0378427	0.0392783	0.03901	0.304802	0.1638	0	0.181107	0.0891393	0.0703043	0.0391427	0.180081	0	0	0.0966927	0.0208048	0.0174075	0.0433834	0.31121	0.0211132	0.0512669	0.0331811	0.0582357	0.887947	0.0599818	0.0700958	0.0250859	0.0123396	0	0.0443298	0.0542551	0.0409043
NvNCol-like 4 : NV2.11818	0.00216655	0	0.0215778	0	0	0	0	0	0	0	0	0.00177427	0.0475964	0	0	0	0	0	0	0	0	0.0139123	0	0.0164307	0	0.0219375	0.00844158	0	0.0474727	0	0.0284007	0	0	0	0.00355686	0.0694888	0	0	0	0	0.451598	0	0.0102544	0	0	0.15873	0	0	0.0556736
NvNCol1 : NV2.12621	0.0561193	0.0508225	0.0568202	0.0790245	0	0.124521	0	0.00952635	0	0.111547	0.0110529	0.186896	0.118013	0.106247	0.11943	0.041325	0.101724	0.0989927	0.10006	0.221416	0.151302	0.222035	0.259179	0.142185	0.14261	0.298171	0.165159	0.124517	0.105474	0.143425	0	0.0903659	0.0121218	0.335109	0.0970243	0.128403	0.13946	0.0995969	0.171704	0.0853375	0.0905469	0.0327106	0.180085	0.114204	0.0914825	0.0618638	0.00463653	0.244298	0.0451439
NvNCol4 : NV2.11801	0.0597729	0.0456172	0.0769239	0.11222	0.0225323	0	0.00149895	0	0	0.0423836	0.0153593	0.087776	0.0767148	0.516465	0.221844	0.0571447	0.176562	0.0359482	0.388885	0.187268	0.139228	0.325306	0.143707	0.0823605	0.183279	0.146582	0.0701055	0.00863916	0.0333628	0	0.0775344	0.286317	0.190888	0.0650991	0.105087	0.191806	0.0685519	0.0660676	0.104427	0.0481155	0.133103	0.237496	0.0341513	0.0770902	0.290559	0.125665	0	0.113599	0.0308538
NvNCol5 : NV2.11802	0.149582	0.0795384	0.0776257	0.10266	0.0571543	0	0.0436932	0	0	0	0.0146818	0.268271	0	0.076715	0	0.0157542	0.0208181	0	0.0431689	0.117683	0.0391159	0.0464805	0	0.0253582	0	0	0.0349631	0.0329031	0.0172549	0.163873	0	0	0.0392505	0	0.0476526	0.0566404	0.0763455	0.00703532	0.0716958	0.0536306	0.31097	0.0107883	0.128531	0.0416583	0.0130636	0.01473	0	0.0297543	0.0324709
NvNCol6 : NV2.11815	0.349852	0.319333	0.521938	0.514103	0.0630356	0	0	0.00834836	0.0115024	1.11052	0.617835	1.25831	0.720176	1.01343	0.445825	0.366838	1.00652	0.315619	0.814415	0.634966	0.953019	1.97835	0.928542	0.285283	1.28347	1.7172	0.739713	0.382425	0.378974	0.395261	0.362549	0.729842	0.278858	1.00648	0.826511	1.05792	0.361024	0.192515	0.269783	0.741378	0.0366126	0.414692	0.334943	0.346439	0.750266	0.662914	0.668411	1.05966	0.383084
NvNep8 : NV2.20322	0.000580954	0.000463022	0.00494124	0.00845432	0	0	0	0	0	0.00464181	0	0	0	0	0.0349398	0	0.0431355	0	0	0.0206126	0	0.00200184	0	0	0	0	0	0.0137781	0.00814598	0	0	0.015067	0	0	0.0155796	0.0454926	0	0.00498512	0.0165404	0.008725	0	0	0	0	0	0.0488701	0	0	0
NvNgalectin-1 : NV2.5200	0.0990952	0.0613101	0.100996	0.118371	0	0.316047	0.0261796	0.00228568	0	0.0850745	0.144267	0.30053	0.0889588	0.201176	0.139566	0.0595488	0.158097	0.209409	0.0695677	0.202733	0.0993108	0.216309	0.0721874	0.0921228	0.269163	0.263077	0.225032	0.0415663	0.0915397	0.0903994	0	0.185198	0.0460211	0.253023	0.063397	0.0948997	0.135395	0.0510083	0.143077	0.0733762	0	0.0863776	0.107006	0.150302	0.148518	0.0575644	0.193626	0.153731	0.0993486
NvNgalectin-2 : NV2.5188	0.00391007	0.00871417	0.0077686	0.0120075	0	0	0	0	0	0	0	0.0474156	0	0	0	0	0.0103718	0	0	0	0.00305203	0.0176716	0	0	0	0	0.0366972	0	0.00940359	0	0	0	0	0	0.00962412	0.0466683	0.0164935	0	0.00471018	0.0530077	0	0	0.00414244	0	0.00585382	0	0	0	0
NvNgalectin-3 : NV2.5196	0	0	0.00016423	0.00877216	0	0	0	0	0	0	0	0	0	0	0	0	0	0.037611	0	0	0	0	0	0	0	0	0	0	0	0	0	0	0	0	0	0.00316023	0	0	0	0	0	0	0.00812465	0	0	0	0	0	0
NvNgalectin-like : NV2.4511	0.0185991	0.0253559	0.0125669	0.0100351	0.0159917	0	0.0212984	0.23261	0.17118	0.0280268	0	0.0136317	0.00255895	0.00847544	0.0145291	0	0.0400421	0	0.0237657	0	0.017643	0.0212965	0	0.0363802	0.0608376	0.0239942	0.0280061	0.0241896	0.00773946	0	0	0.00739126	0	0	0.0399721	0.0537848	0.0390248	0	0.00179177	0	0.0681477	0.0124882	0.00207567	0.00522411	0	0	0	0	0.0431367
NvNOWA-1 : NV2.15872	0.00793054	0.00325822	0.00817889	0.0281434	0	0	0	0	0	0	0	0.123914	0.0478574	0	0	0	0.0475534	0	0	0.0341096	0.0404368	0	0	0	0	0.0517759	0.0221571	0	0.0126721	0	0	0	0	0	0.00216167	0.0244523	0	0	0.00471018	0	0	0.24639	0.00606442	0	0.0360823	0	0	0.00614598	0.0124126
NvNOWA-2 : NV2.10392	0	0	0	0.000697776	0	0	0	0	0	0	0	0	0	0	0	0	0	0	0	0.0426352	0	0	0	0	0	0	0	0	0.0369932	0	0	0	0.012377	0	0.0218996	0	0	0	0	0	0.0632631	0	0	0	0	0	0	0	0
NvNOWA-3 : NV2.10388	0.0320802	0.0284777	0.0167564	0.0319199	0.0276861	0	0.0515017	0	0	0.0213125	0.0142719	0.00676319	0.0564181	0	0	0	0.00984434	0	0	0.0102098	0.0287603	0.0314608	0	0	0.150186	0.0855286	0	0	0.0460303	0	0	0.0483765	0.0301305	0	0.0381842	0.00632046	0	0	0.0437064	0	0.05973	0.0612505	0.00613216	0	0.00327516	0.00320262	0	0	0.00468544
NvNOWA-4 : NV2.10390	0.00344422	0.00295196	0.00427692	0	0	0	0.00637088	0	0	0	0	0	0	0	0	0	0	0	0	0	0	0	0	0	0	0	0	0	0	0	0	0	0	0	0.00212462	0	0	0	0	0	0	0	0	0	0	0	0	0	0.00419688
NvNOWA-related : NV2.10391	0	0	0	0	0	0	0.00222203	0	0	0	0	0	0	0	0	0	0	0	0	0	0	0	0	0	0	0	0	0	0	0	0	0	0	0	0	0	0	0	0	0	0	0	0	0	0	0	0	0	0
NvPFnt : NV2.24348	0.0034202	0.00182326	0.0043882	0	0	0	0	0	0	0.00920376	0	0.0578154	0	0.00761765	0.0162204	0	0	0	0	0	0	0	0	0	0	0	0	0	0	0	0	0.00472921	0	0	0.00220997	0.00316023	0	0	0	0	0	0	0	0	0	0	0	0	0
NvPolyEGF-18 : NV2.6437	0.0030349	0	0	0	0	0	0	0	0	0.0100681	0	0	0.0115119	0	0	0	0	0	0	0	0	0	0	0	0	0	0	0	0	0	0	0	0	0	0	0	0	0	0	0	0	0	0	0	0	0	0	0	0
NvPolyEGF-5 : NV2.6022	0.00397269	0.00159295	0.00208371	0.0058895	0	0	0	0	0.0210807	0	0	0.00366146	0	0.0187709	0.028503	0	0.0237258	0	0.11948	0.00993473	0.0226653	0	0	0	0.181107	0	0	0	0	0	0	0	0.0471198	0	0.000364223	0	0.0268786	0.051282	0	0	0	0.029477	0	0	0	0	0	0	0
NvPolyvWFA : NV2.8635	0.00253585	0.000453339	0.000778488	0.00593182	0	0	0	0	0	0	0	0	0	0	0	0	0.0028533	0	0	0	0	0	0	0	0	0	0	0	0	0	0	0.00408802	0	0	0.0187545	0	0	0	0	0	0	0	0.00583444	0	0	0	0	0	0.00765031
NvProFnt : NV2.24561	0	0	0.000214759	0.000230066	0	0	0	0	0	0	0	0	0	0	0	0	0	0	0	0	0	0	0	0	0	0	0	0	0	0	0	0	0	0	0	0	0	0	0	0	0	0	0	0	0	0	0	0	0
NvSCP-TSR-1 : NV2.17517	0.000766565	0.000466614	0.00406953	0.000669943	0	0	0	0.0121405	0	0	0	0.00698086	0	0.0110792	0	0	0	0	0	0.0119534	0	0	0	0	0	0	0	0	0.020222	0	0	0	0	0	0	0	0	0	0	0	0	0.0921897	0	0	0	0	0	0	0
NvSCP-TSR-2 : NV2.17827	0.00743643	0.00410183	0.00235104	0.00369961	0.055344	0	0.0116595	0.00463422	0.025684	0.0210727	0.00914682	0.00647297	0	0	0	0	0	0.0141457	0	0.00851041	0	0	0	0	0.362214	0	0.0112754	0	0	0	0	0	0	0	0.0166558	0	0	0	0.0108238	0	0	0	0	0	0	0	0	0	0.0046503
NvSEA-WSC-1 : NV2.13381	0.0100542	0.00185087	0.00656766	0.0134756	0	0	0.00412752	0	0	0.0871004	0	0	0	0	0.0244954	0	0.021231	0	0	0	0.00608521	0	0	0	0	0	0	0	0	0	0	0	0	0	0.00316518	0.0405948	0	0.0303105	0	0	0	0.00363345	0	0	0.0349611	0	0	0	0
NvSEA-WSC-2 : NV2.15283	0.0374435	0.0434646	0.0289749	0.0555579	0	0	0.00182969	0.0161552	0	0.00933715	0	0.0525655	0.0501763	0	0.00472599	0	0.0247651	0.0302195	0	0.0136771	0.0158512	0	0.0601251	0.097972	0.0229824	0.116741	0.0353015	0.0241896	0.0946075	0	0	0.0551492	0.0397741	0.0174075	0.0163679	0.102819	0	0.0499062	0.0292252	0	0.0155294	0.0250188	0.0233718	0.0793068	0.00230878	0	0.0886596	0.0339303	0.00663482
NvSPP-like-1 : NV2.16360	0.000409607	0.00213859	0.00136234	0.00410152	0	0	0	0	0	0	0	0	0	0	0	0.0164186	0.0028533	0	0	0.00325881	0.00305203	0	0	0	0	0	0.0793795	0	0	0	0	0.00184168	0	0	0.00105962	0	0	0	0	0	0	0	0	0	0.00525642	0	0	0	0
NvSPP-like-2 : NV2.14010	0.00378352	0.000545643	0.00494123	0.00028581	0	0	0	0	0	0	0.00615714	0.0069988	0.00374078	0.0999001	0	0	0.0131664	0	0	0	0	0.00837685	0	0	0	0	0	0.0322935	0	0	0	0.00297555	0	0.0229654	0.00462265	0	0	0	0	0	0	0	0	0	0.00102372	0	0	0.00892237	0.00472969
NvSPP-like-3 : NV2.24359	0.00295915	0	0.00158537	0.00206085	0	0	0	0	0	0.0842275	0.00928792	0.00670384	0	0.0197441	0	0	0	0	0	0	0	0	0	0	0	0	0.00559137	0	0	0	0	0	0	0	0.0103805	0	0	0	0	0	0	0	0	0	0	0	0	0	0
NvThyr-TSR-EGF : NV2.4066	0.0242624	0.000678249	0.00412312	0.0055629	0.0385582	0	0.0876632	0	0	0	0	0.00259693	0	0	0	0	0.00674308	0	0	0	0	0	0.0100853	0	0	0	0	0	0	0	0	0	0	0	0.00132725	0.00948069	0	0	0	0	0	0	0.00829379	0	0	0	0	0	0
NvThyrd : NV2.17626	0.00310183	0.000483016	0.00453212	0.00424225	0	0	0	0	0	0	0	0.00354855	0.00162254	0	0	0	0	0	0	0	0	0	0	0	0	0	0.00613256	0	0	0	0	0	0	0	0	0	0	0	0	0	0	0	0	0.00127788	0	0	0.0142311	0	0
NvTSRd-1 : NV2.24334	0.0342263	0.0266441	0.0339606	0.0305782	0	0	0.0518989	0.0129209	0	0.0132515	0.00468937	0.0555619	0.0553559	0.174106	0.012125	0.0511469	0.0393552	0.0224578	0.0140869	0.107627	0.0169628	0.0725996	0.0921602	0.00863433	0.151674	0.043875	0.00860849	0.0631012	0	0	0	0.0465165	0.0556615	0	0.0297462	0.0110675	0.0178119	0.00808387	0.00289214	0.00858534	0	0	0.0530449	0.0451785	0.0772495	0	0	0.0119002	0.00619155
NvTSR-1 : NV2.737	0	0	0	0	0	0	0.00722599	0	0	0	0	0	0	0	0	0	0	0	0	0	0	0.0081628	0	0.00860254	0	0	0	0	0	0	0	0	0	0	0.00240569	0.00948069	0	0	0	0	0	0	0	0	0	0	0	0	0
NvTSR-2 : NV2.2780	0.00179425	0	0.005026	0.000181246	0	0	0	0	0	0	0	0	0	0	0	0	0.00610903	0.130959	0	0.0417123	0.0591774	0	0	0	0.0564921	0	0	0	0	0	0	0	0	0	0.00196844	0.0163242	0	0	0	0.0818749	0	0	0	0	0	0	0	0	0
NvTSR-3 : NV2.3202	0.00555616	0.00447908	0.00383376	0.00539055	0	0	0.00163159	0	0	0.0140134	0	0.0205622	0.014463	0	0.0166356	0	0.0028533	0.0247598	0	0	0	0	0	0.0457231	0	0	0	0	0.00670925	0	0	0.00297555	0.00849228	0	0.0141286	0	0	0	0.00596895	0	0	0	0	0	0	0	0	0	0
NvTSRDisc : NV2.10387	0.0151306	0.00140395	0.00675538	0.0069452	0	0	0.00620272	0	0	0	0	0	0	0	0	0	0	0	0	0	0	0	0	0	0	0	0	0	0	0	0	0	0	0	0.000904338	0.00316023	0	0	0	0	0	0	0.0039507	0	0.00174942	0	0	0	0
NvvWFA-16 : NV2.14625	0	0	0	0	0	0	0	0	0	0	0	0	0.00299348	0	0	0	0	0	0	0	0	0	0	0	0	0	0	0	0	0	0	0	0	0	0	0	0	0	0	0	0	0	0	0	0	0	0	0	0
NvvWFA-21 : NV2.21578	0.00313825	0.00121162	0.000733025	0.0229732	0	0	0	0	0	0	0.137268	0	0	0	0	0	0	0	0	0	0.0716434	0.0216858	0	0	0	0	0	0	0	0	0	0	0	0.0329654	0	0	0	0	0	0	0	0	0	0	0	0	0	0	0
NvvWFA-5 : NV2.1044	0.000999894	0	0.00149565	0.00598813	0	0	0.0046766	0	0	0.0215166	0	0.0288232	0	0	0	0	0.00562451	0	0	0.0110924	0.0132763	0	0	0.00903499	0	0	0	0	0	0.0263186	0	0.00203865	0.0198572	0.0949073	0.0186041	0.016672	0	0.00757355	0.0244334	0	0	0.474878	0.00246174	0.018641	0.0309293	0.0488701	0	0	0
NvvWFA-6 : NV2.1047	0.000524924	0.00295371	0	0	0	0.144388	0	0	0	0	0	0.00532282	0	0	0	0	0	0	0	0	0	0	0	0	0	0	0	0	0	0	0	0	0	0	0	0	0	0	0	0	0	0	0	0	0	0	0	0	0
NvvWFA-7 : NV2.8413	0	0	0.000438323	0	0	0	0	0	0	0	0	0	0	0	0	0	0.0175271	0	0	0	0	0	0	0.0097271	0	0	0.00825028	0	0	0	0	0	0	0	0	0	0	0	0	0	0	0	0	0	0	0	0	0	0
NvvWFA-TSR : NV2.14005	0	0	0.00191777	0	0	0	0.0110857	0.026256	0.0360821	0.0140134	0.00468937	0	0.00661395	0	0	0	0	0	0	0	0	0	0	0	0	0	0	0	0	0	0	0	0	0	0	0.0189614	0.0101908	0	0	0	0	0	0	0	0	0	0	0	0
NvvWFA-WSC : NV2.21576	0.00139274	0.00116469	0.00124423	0	0	0	0	0	0	0	0	0.00259693	0	0	0	0	0	0	0	0	0	0	0	0	0	0	0	0	0	0	0	0.00274323	0	0	0	0	0	0	0	0	0	0	0	0	0	0	0	0	0.085941
NvvWFAConA-1 : NV2.16335	0.00657735	0	0.00379636	0.000852777	0.055344	0	0.0205137	0	0.00460928	0	0	0	0.0615953	0	0	0	0	0	0	0	0	0	0	0	0	0	0	0	0	0	0	0	0	0	0.000989342	0	0	0.0210896	0	0	0	0	0.04094	0	0	0	0	0	0
NvvWFAConA-2 : NV2.16336	0.00150275	0.00144846	0.000955098	0.000674168	0	0	0	0	0	0	0	0	0	0	0	0	0	0	0	0	0	0.0146484	0	0	0	0	0	0	0	0	0	0	0	0	0	0	0	0	0	0	0	0	0	0	0	0	0	0	0
NvvWFAGGP : NV2.8259	0	0	0.000865217	0.00030756	0	0	0.00580834	0	0	0	0	0	0	0	0	0	0	0	0	0	0	0	0	0	0	0	0	0	0	0	0	0	0	0	0	0	0	0	0	0	0	0	0	0	0	0	0	0	0
NvvWFAIg : NV2.21577	0.000709885	0	0.0031342	0.000462959	0	0	0	0.0371645	0.0213356	0	0.0063909	0	0	0	0	0	0	0	0	0	0	0	0	0	0	0	0	0	0	0.0879415	0	0.00408802	0	0	0.0119479	0	0	0	0.00225413	0	0	0	0	0	0	0	0	0	0
NvvWFAShKT-1 : NV2.8258	0.00090813	0	0.000377171	0	0	0	0	0	0	0	0	0	0	0	0	0.0255891	0	0	0	0	0.00192118	0	0	0	0.0545268	0	0	0	0	0	0	0	0	0	0	0	0	0	0	0.0452726	0.0623092	0	0	0	0	0	0	0	0
NvvWFAShKT-2 : NV2.8260	0.00345001	0.00454098	0.014972	0.00104088	0.0710922	0.163854	0.0496334	0.00487315	0	0	0	0	0	0	0	0	0	0	0	0	0.0499141	0	0	0	0	0	0	0	0	0	0	0	0	0	0.048915	0	0	0	0.00114125	0	0	0	0	0	0.00221578	0	0	0	0
NvMfap4-7 : NV2.17967	0.0175086	0.0196931	0.00654957	0.0172409	0.138402	0	0	0	0	0	0	0	0.00684661	0	0	0	0	0	0	0	0	0	0	0	0	0	0	0	0	0	0	0.00472921	0.109649	0	0.00482243	0	0.00643617	0	0	0	0	0	0	0	0.0016904	0	0.187685	0	0
NvSushiTSP : NV2.15519	0.0214656	0.0142663	0.00565877	0.0157928	0.0278635	0	0.0189369	0.0374461	0.169952	0.0240151	0.00698234	0.0170368	0.00756553	0.0231906	0.00386853	0.0169473	0	0	0	0.0169767	0.0218346	0	0	0	0	0	0.032754	0	0	0.0644695	0	0	0	0	0.0167193	0.0278791	0.0229519	0.00414837	0	0.0199279	0	0.0505292	0.0282663	0.0039127	0	0.0205822	0.00924835	0.0646354	0
NvCTLD-7 : NV2.8278	0.0958065	0.0574774	0.0292301	0.0728158	0.0187892	0	0.0327642	0.00243303	0	0.0251589	0.0363561	0.0392259	0.00924132	0.00761765	0.026138	0.0575261	0.00551283	0	0	0.00328787	0.043363	0.0533652	0.0465925	0.0553025	0	0	0.00617431	0.0504311	0.10522	0	0	0.0245322	0.178592	0	0.0243898	0.0466683	0.0676219	0.0339506	0.0459184	0	0.05973	0.0133442	0.0421531	0.0797137	0.0365918	0.00534853	0	0.0697711	0.152726
NvNat-like : NV2.5928	0.00215545	0.000534586	0.00188462	0.000305223	0	0	0.000758398	0.00486606	0	0.098131	0	0.0190381	0	0.496922	0	0	0	0.0886588	0	0.00686726	0.0360708	0.0136022	0.00511933	0	0.0440921	0.0563533	0.152496	0.0377652	0.0181144	0	0	0.0156769	0.0380273	0	0.00996833	0.00452645	0.0988893	0.00534867	0.00672705	0	0	0.143698	0.00125537	0.240462	0.00928009	0.0494417	0	0	0.0725145
NvBMP7 : NV2.6269	0.0883601	0.0951629	0.167643	0.0386838	0.0102225	0.0500711	0	0	0	0.108527	0	0.0300588	0.0835478	0.0575009	0	0.0254899	0.00898129	0.052919	0.102001	0	0.00192118	0.00359906	0.0945305	0.0215341	0.150186	0	0.0586894	0.0382811	0.0317356	0.0918814	0	0	0.0508731	0.234311	0.0591287	0.0873937	0.0426329	0.0268377	0.00271874	0.0255257	0	0	0.0380026	0.0264177	0	0.00622634	0.100973	0.0245631	0.00663482
NvCUB-misc-3 : NV2.3898	0.0547164	0.0547156	0.0332903	0.0278556	0	0.45041	0.0136426	0.00256056	0	0.0381663	0.0717078	0.0620141	0.0193032	0.0195547	0.0552597	0.0712884	0.0301051	0.00732549	0	0.00363483	0.0156117	0.0294229	0.122267	0.131276	0.0605386	0.0134142	0.0833787	0.0562216	0.0466273	0.245236	0	0.0121686	0.0395677	0.171722	0.0306846	0.00351884	0.0211348	0.0626365	0.038031	0.00389676	0	0.0188431	0.0122295	0.033762	0.0351277	0.0216913	0.0320365	0.14998	0.0300706
NvJag : NV2.19817	0.0374691	0.0603672	0.172284	0.129534	0.0385582	0	0.00426602	0.00820654	0	0.0452487	0.00496513	0.0781348	0.00223305	0.847583	0.156247	0	0.00365314	0.232162	0.188008	0.0927249	0.191045	0.25874	0.0924543	0.0280631	0	0	0.0115694	0.0187846	0.21446	0	0.0385779	0.0348114	0.0191211	0.0342077	0.0341994	0.368076	0.0166524	0.00877285	0	0.150796	0	0	0.0300198	0.00595036	0.0287787	0.033408	0	0.00971542	0.0459866
NvWnt11 : NV2.22664	0.0762194	0.04888	0.144096	0.00677092	0	0.228885	0.0020592	0	0	0	0	0	0.00742007	0	0	0	0	0	0	0.0319049	0.119715	0	0	0.0476865	0.0427614	0.00836646	0	0.0136822	0	0	0.0226175	0.00312673	0	0	0.0339575	0	0.00325123	0.00520125	0	0	0.0293919	0	0	0.00400215	0	0	0	0.0164013	0.0587495
NvPtprq-1 : NV2.600	0.00422143	0.00218468	0.00483396	0.000402193	0	0	0	0	0	0	0.010702	0.0100521	0.00422362	0	0	0.0679643	0	0	0	0.019122	0.0101033	0.0141133	0	0.0276517	0	0	0	0	0.0237343	0	0	0	0	0	0.0193919	0.0959734	0.0582003	0.00892851	0.0106448	0	0.143616	0	0.00858372	0.0122075	0.0031914	0.0356219	0	0	0.157651
NvHCF1 : NV2.3399	0.153155	0.0770971	0.0772129	0.101255	0.0102225	0.52521	0.0719397	0.0803907	0.0131137	0.0467604	0.0498789	0.0514211	0.0432197	0.0694483	0.037125	0.00658487	0.0641006	0.0141457	0	0.130837	0.0797399	0.16908	0.123211	0.0124674	0.0633408	0.0582479	0.092604	0	0.011571	0	0	0.0171674	0.0300442	0.281305	0.0615974	0.0359036	0.0323724	0.00579896	0.0101631	0	0	0	0.00975634	0.00537935	0.0249649	0.00622634	0.0664024	0.047881	0
NvVgccA2-1 : NV2.16117	0.0967862	0.148305	0.0642958	0.063974	0.0379086	0	0.064808	0	0.00808737	0.0107013	0.0810063	0.122831	0.0585207	0.0189438	0.143956	0	0.0138318	0.121382	0	0.0188428	0.078216	0.0529878	0.105463	0.097555	0.0828906	0	0.0179888	0.0292173	0.0675247	0.0842602	0	0.0127628	0.081453	0.0299998	0.0344038	0	0.0282343	0.017013	0.0804448	0.00347105	0.0324328	0.0767828	0.00109381	0.0181546	0.00367281	0	0.0332187	0.00813613	0.0228309
NvCykR-4 : NV2.14182	0.0221701	0.0159462	0.102435	0.140833	0.193879	0	0.0159757	0	0.00848217	0	0.00698234	0	0	0	0.0468184	0.0243575	0	0.0368386	0.113626	0.0176283	0.00777372	0.00378045	0.137898	0	0	0	0.00616388	0.0141578	0.0372183	0	0	0.00902599	0.065505	0	0.0114976	0.00768386	0.040644	0.0546978	0.0118958	0	0	0.0060827	0.0112654	0.00693678	0.00379707	0	0.0793512	0	0.00845234
NvDomCykR-1 : NV2.12653	0.14611	0.254995	0.0811637	0.039391	0.0851568	0	0.0339734	0.0696187	0.0139512	0.124437	0.0305718	0.063712	0.0596651	0.00707664	0.0166889	0	0.0033138	0	0.150145	0.0717323	0.12951	0.0677857	0.0248114	0.0243751	0	0.0652356	0.0395782	0.0172491	0.0516738	0	0	0.0559626	0.0578957	0	0.0416364	0.0202793	0.0514384	0.00808387	0.0650121	0	0	0.00388195	0.00887307	0.0348073	0.00467292	0.085034	0.00547996	0.0928646	0.097912
NvIgCam-2 : NV2.14189	0.0208031	0.0201361	0.0370619	0.0194778	0.030972	0.158242	0.16764	0.0242686	0.432856	0	0.00408819	0.0268928	0	0	0.117792	0.103605	0	0	0	0.026496	0.0058181	0	0.0160787	0.0565649	0.122977	0	0.0202224	0.0538035	0.0353591	0.0891679	0.179936	0	0.0355877	0	0.0120675	0	0.0119077	0.00578414	0.0250672	0.0136403	0.0366126	0.0186191	0.0376533	0.00169062	0.0326452	0	0.0654778	0.0452711	0.031327
NvNCAM-like-3 : NV2.21151	0.0968643	0.0733635	0.0607342	0.0604348	0.0388031	0	0.1368	0.0334638	0.057478	0.025119	0.0129407	0.0692804	0.073149	0.0521512	0.0745599	0.0304299	0.0882027	0	0.0188725	0.0432991	0.0560651	0.0190776	0.203981	0.0426939	0	0	0.0438538	0.0152172	0.0854502	0.0809953	0.0284667	0.0335082	0.076079	0	0.0400391	0.0296464	0.0177019	0.0489817	0.0188174	0	0	0.00957029	0.00372986	0.0274177	0.0636101	0.0974762	0	0.1019	0.048854
NvNCAM-related-2 : NV2.22081	0.0364743	0.0127282	0.0142604	0.0148406	0.0468544	0.161249	0.0025833	0	0	0	0.0106663	0.0123947	0.00304573	0	0	0	0	0	0.0793122	0	0	0	0	0.048894	0.0608376	0	0.00999816	0.00299825	0	0	0	0.00333543	0.0305415	0	0.0125179	0	0.0353105	0.0147019	0.0318781	0	0.0657808	0.148285	0.0538563	0.0742418	0.174746	0.00320262	0.0544856	0	0
NvNrp-related : NV2.6344	0.0529082	0.0670373	0.0656821	0.126122	0.187556	0	0.141271	0	0	0.0239367	0.0623122	0.175278	0.0436913	0.262655	0.105713	0.138559	0.12152	0.0352478	0.0758379	0.0914702	0.11242	0.12117	0.309561	0.122941	0.0814001	0.0620176	0.0849101	0.224722	0.0271869	0.0577247	0.0589338	0.033601	0.09117	0.0229654	0.109491	0.125066	0.14266	0.0390898	0.0584584	0.100073	0.237342	0.050162	0.10764	0.0446806	0.0285558	0.0773072	0.05466	0.0640839	0.159062
NvSortR : NV2.16213	0.287781	0.162737	0.153243	0.173491	0.0799424	0	0.103992	0.00224764	0.0605078	0.0616386	0.0423988	0.153114	0.0181677	0.0544855	0.00412167	0	0.102539	0.0477475	0.0331963	0.118085	0.0683864	0.07338	0.0336175	0.0396911	0	0.0785262	0.158983	0.101281	0.0537933	0.047259	0.128007	0.0994477	0.127978	0.240364	0.0782931	0.0393274	0.034019	0.0408789	0.053309	0.0579505	0	0.0974427	0.0450357	0.0641757	0.0143748	0.0148624	0.170282	0.0486289	0.0706415
NvSOL-like-1 : NV2.14373	0.0378266	0.010444	0.316056	0.109649	0.0247937	0	0	0	0	0.127856	0.148854	0.0920096	0.0567502	0.109032	0.0349643	0.0367181	0.168867	0.236703	0.0547202	0.318519	0.294976	0.33404	0.0993271	0.14048	0.683541	0.368012	0.0875433	0.144721	0.201151	0.158659	0.0427543	0.197954	0.866991	0.0746965	0.169133	0.052429	0.232251	0.146453	0.162646	0.173031	0.0373958	0.392345	0.639327	0.26311	0.319756	0.52625	0.114275	0.5151	0.124169
NvTSRd-4 : NV2.18394	0.0188334	0.00930379	0.300452	0.0477569	0	0	0	0	0	0.041867	0.00630679	0.0971287	0.05511	0	0.164761	0	0.0288946	0.0902364	0.0237657	0.00236884	0.0412657	0.0486238	0	0.0578414	0	0.052995	0.0502545	0.00892793	0.0267747	0	0.0854	0.0447482	0.0864045	0.0473162	0.037065	0.0136478	0.0186571	0.00574744	0.00688236	0.0847574	0	0	0.157597	0.0271368	0.00120088	0.0165069	0.00397293	0	0.0128353
NvNid : NV2.20722	0.296999	0.171546	0.207834	0.213763	0.045271	0.0500711	0.0206869	0.253253	0.250907	0.0321328	0.0351507	0.0723078	0.0324767	0.112601	0.0756413	0	0.0551244	0.0322865	0.0334042	0.0566932	0.00192118	0.0178312	0	0.0414166	0.172723	0.0997665	0.029016	0.0577137	0.102256	0.0756407	0.070422	0.00906901	0.118879	0	0.0697427	0	0.0506857	0.0124938	0.0726863	0.0226786	0	0.00834397	0.0314584	0.0304439	0.0636686	0.0224873	0.0730561	0.130596	0.0382966
NvCUB-ZP-1 : NV2.21283	0.654311	0.451142	0.289102	0.0805597	0.347164	0.0500711	0	0	0	0	0.00503326	0.0669291	0.0298639	0.0211676	0	0	0.0591432	0.0531267	0.0140869	0.0322411	0.0153526	0.0113428	0.0160108	0.0249739	0.0330929	0.0414779	0.0168442	0.0704276	0.0265561	0	0.092334	0.0325369	0.0211922	0	0.241984	0.00707906	0.0299994	0.0486689	0.0180074	0.00522808	0.0366126	0.0194732	0.0146108	0.00953955	0.0182552	0.0144901	0.00463653	0.00145565	0.0448105
NvNADPH1-2 : NV2.21	0.251677	0.352001	0.185217	0.0883617	0	0	0.0304931	0.0128372	0.0162896	0.00464181	0.0127786	0	0.0282297	0.0646637	0.00572803	0	0.00808339	0.063409	0.0183092	0.0335187	0.0405706	0.0043729	0.0624204	0.0231237	0	0	0.0126335	0.161772	0.0498496	0.258799	0.0414659	0.0126532	0.0762485	0.097921	0.214021	0.0487354	0.0902685	0.0816037	0.0389957	0.0242286	0	0.0044591	0.00846162	0.0255532	0.0140154	0.0315776	0	0.0167711	0.0388102
NvFREP-13 : NV2.7282	0.00463334	0.0063206	0.0454047	0	0	0.158242	0	0	0.570681	0	0	0	0.0214581	0	0	0	0	0	0	0	0.00429427	0.00274794	0	0.0164307	0	0.043875	0.00272688	0	0	0	0	0	0	0	0.0273987	0	0	0	0	0	0	0	0	0	0	0	0.208568	0	1.10473
NvPkd1-like-2 : NV2.20778	0.473822	0.556122	0.328045	0.0543056	0.0102225	0.452489	0.00600584	0	0.0052044	0.157987	0.0937096	0.121949	0.0485485	0.100403	0.013543	0.0123155	0.0236507	0	0	0.02446	0.0310798	0	0	0	0	0.0558872	0.00484593	0.0799723	0.0986787	0.064203	0.0284667	0.0149505	0.0439363	0.0663773	0.0911923	0.00486008	0.0438055	0.00539005	0.00805254	0.00583006	0	0	0.0183965	0.0342395	0	0	0.0156812	0	0.160696
NvFat-like : NV2.3144	0.413817	0.402349	0.216725	0.087087	0.0208709	0	0.0557542	0.022224	0.0958007	0.00748864	0.00594606	0.0481576	0.0296213	0.234522	0.0151911	0.103605	0	0	0.178229	0.019122	0.0177171	0	0.114913	0	0	0.0166259	0.0187787	0.0550842	0.00962353	0	0.195417	0.00177912	0.335739	0.0949073	0.162489	0.120149	0.0326794	0.00492549	0.011341	0.0614901	0.149768	0.0584575	0.0067668	0.00558374	0.0304365	0	0	0	0.0124126
NvIgCam-7 : NV2.21994	0.0849659	0.224292	0.138512	0.0476128	0.053229	0	0.0379064	0.0319471	0	0.0331511	0.043528	0.0761186	0.150132	0.10589	0.0325724	0.0650239	0.0265249	0	0.224891	0.0891444	0.143054	0.10097	0.018455	0.0470728	0.11131	0.177242	0.143467	0.0832203	0.041327	0.258799	0.0878488	0.0554067	0.0180803	0.0967874	0.0743488	0.0354081	0.114123	0.0201574	0.00972671	0	0.110193	0.0175429	0.0685043	0.0461636	0.0109209	0.0375834	0.0663574	0.0155417	0.0930205
NvHyal-1 : NV2.14428	0.000724989	0.00332062	0.0207572	0.000478582	0.0158333	0	0.000831934	0	0	0.0734731	0.0144254	0.0250401	0.0086201	0	0	0	0.0324147	0	0	0	0	0.0403734	0	0.00218156	0	0	0	0	0	0	0.0284667	0.0666908	0	0	0.0154675	0	0	0	0	0	0	0	0.00536292	0	0	0	0	0	0
NvLDTFM : NV2.20815	0.0117122	0.00282329	0.0169492	0.00591761	0	0.100142	0	0	0.0275009	0	0	0	0	0	0.00669434	0	0.0173997	0	0.0279985	0.0300378	0.0115215	0.0114878	0	0.117975	0	0	0.125928	0.0633264	0.134014	0	0	0.00134761	0.0316157	0.0345817	0.0231831	0	0.0835657	0.00701353	0.0205425	0.0253563	0	0	0.0419476	0.0528915	0	0.0789596	0	0.0129965	0.0451347
NvMuc-like-3 : NV2.1129	0.00215503	0.00502566	0.017283	0.00856196	0	0	0.00795349	0.0166151	0.170929	0.0233908	0.103021	0.126085	0.161327	0.231682	0	0	0.0197187	0	0.0378427	0.0919387	0.0162891	0.149939	0.147341	0.0260376	0	0.0814115	0.131119	0.0161162	0.241152	0.0644695	0	0	0.0165881	0.0135059	0.00457728	0.0175052	0.00245619	0.0101608	0.0135512	0	0	0.00939874	0.0154837	0.0121302	0.0213014	0	0	0.0132302	0.10083
NvFREP-17 : NV2.2132	0.000744578	0	0.000555586	0.00111264	0	0	0	0	0.0147592	0.00748864	0.0210826	0	0.0217293	0	0	0	0.0121171	0	0	0	0	0	0.0100853	0	0	0.0240797	0	0	0.0101722	0	0	0.00184168	0	0	0	0	0.00773463	0	0	0	0	0	0	0	0	0	0	0	0.00375619
NvCAdh-like 3 : NV2.16479	0.00852996	0.00213836	0.00105624	0.00741898	0.055344	0	0.404498	0.0162485	0	0.0302309	0	0	0	0	0	0	0	0	0	0	0	0.0310455	0	0	0	0	0	0.0187846	0	0	0	0	0	0	0.0177509	0	0.024617	0	0	0	0	0	0	0.0084468	0.0010159	0	0	0.00292054	0
NvPolyEGF-16 : NV2.24533	0.0302576	0.11792	0.00955809	0	0	0	0.00131006	0	0	0	0	0.00311236	0	0	0	0	0	0	0.0237657	0	0	0	0	0	0	0	0.0158615	0	0	0	0.0220214	0	0	0	0.0060495	0	0	0	0.00271874	0	0	0	0	0.00178124	0	0	0.0200042	0	0
NvCol-7 : NV2.24375	0.00994771	0.0057219	0.02697	0.0133982	0.0182498	0.20487	0.0990773	0.179919	0.841998	0.0179804	0	0.00709709	0	0.015083	0.0134873	0	0.0605762	0	0.0577861	0	0.0641854	0.0481003	0.0208603	0.112609	0	0.166843	0.13508	0.0846844	0.0806298	0.145666	0	0.0395541	0	0	0.0540629	0.0343231	0.0283596	0.0344613	0.00473909	0	0.125083	0.0060827	0.0185321	0	0	0	0	0.0799833	0.0219324
NvNetr : NV2.7734	0.0467309	0.0664371	0.0567404	0.0471331	0	0	0.000882717	0	0	0.0174255	0.0126136	0.00481907	0	0	0.00669434	0	0	0.39174	0	0.049958	0.00943279	0.119782	0.288827	0.0387278	0	0	0.0900805	0.0175501	0.0377311	0	0	0.0272101	0.0818974	0	0.0451097	0	0.0210424	0	0.00751056	0	0	0	0.052635	0.000949042	0	0	0	0	0
NvLamA2 : NV2.15818	0.0174734	0.00779769	0.0123101	0.0420794	0.0385582	0.318653	0.0293492	0	0	0.00600596	0.0138741	0.00914138	0.0293805	0	0	0	0.0154244	0.0708577	0.0507929	0	0.0027662	0	0	0	0	0.0749086	0.0763715	0.00312049	0	0	0	0	0	0	0.0265471	0.0222747	0.00159689	0.017559	0	0.00414861	0	0.00231357	0	0.00189808	0.0059811	0	0	0.0485507	0.0124126
NvvWFD-1 : NV2.9287	0.0741225	0.018307	0.0302927	0.0193898	0	0	0.0659795	0.109659	0.0471706	0.00663593	0.0142796	0.011454	0.00734045	0.113324	0.0252868	0	0.0221988	0	0	0.0163282	0.0353419	0.0269525	0.0107661	0.0328932	0	0	0.145198	0.0664037	0.044624	0	0	0.0110053	0.00716163	0.0345817	0.060141	0	0.0529311	0.0135723	0.00358354	0.0709789	0.136295	0.0912833	0.0341163	0.0176672	0.124706	0.0514678	0.394615	0.0164093	0.0263157
NvPlc : NV2.14907	0.00324241	0.00494504	0.00195623	0.00297403	0.0276861	0	0.00156722	0	0	0	0.0093302	0.0103707	0.0122931	0	0	0	0	0	0	0	0.00199127	0	0.0819001	0	0	0	0	0	0	0	0	0	0	0	0	0	0	0	0	0	0	0.00787912	0	0	0	0	0	0	0
NvPlc-like : NV2.14904	0.00242558	0.0054676	0.00614929	0.00686763	0	0	0.00127401	0	0	0	0.00198202	0	0	0	0.00449802	0	0.0108909	0.0480954	0	0.059631	0	0	0	0	0	0	0	0.0316166	0.0646886	0	0	0.0132106	0	0	0.00497173	0	0	0	0	0	0	0	0	0	0	0	0.0119874	0.00145565	0
NvCoag-like 5 : NV2.3648	0	0	0.000317557	0	0	1.98788	0	0	0	0	0	0	0	0	0	0	0	0	0	0	0	0	0	0	0	0	0	0	0	0	0	0	0	0	0.0104337	0	0	0	0	0	0	0	0	0	0	0	0	0	0
NvItih-hC : NV2.15230	0.00324329	0.00163418	0.00209351	0.00415018	0	0	0	0	0	0.0618039	0.197647	0.451944	0.240086	0.265369	0.0513999	0.931148	0.505409	0.764462	0	0.182705	0.440553	0.199558	0.182501	0.173819	0.237696	0.548817	0.330575	0	0.19636	0.436716	0	0.0227135	0	0.0325495	0.112428	0.0440984	0.00379596	0	0.00467111	0	0	0	0.0394683	0	0	0	0	0.0743444	0.178337
NvDllR-2 : NV2.22236	0.129073	0.531968	0.187033	0.0941968	0.267723	0	0.0363187	0.318555	0.0538351	0.0570334	0.273564	0.135858	0.0414753	0.14233	0.02449	0.0914177	0.0385663	0.0467603	0.19131	0.093915	0.0424467	0.126285	0.0586991	0.0769011	0.0175431	0.0240797	0.0681518	0.0705634	0.0852018	0	0	0.044551	0.00844566	0.398055	0.120338	0.127907	0.0661285	0.0128368	0.0238606	0.0664832	0	0.034085	0.0019918	0.0436384	0.0600935	0	0.0340033	0.0528996	0.121413
NvWnt8a : NV2.4522	0.00296194	0.00403843	0.0204084	0.00507052	0.0562106	0	0	0	0	0	0	0	0.0667806	0	0.0408637	0	0.0100747	0	0	0	0	0	0	0	0	0	0	0	0.00504916	0	0	0	0	0	0.0066369	0	0.0259245	0.00492549	0	0	0	0	0	0.0037282	0	0	0	0	0.00705354
NvFnt-1 : NV2.24355	0.00897948	0.00352058	0.00424149	0.00504175	0	0	0.0221634	0.0301904	0.185226	0	0	0.00518796	0.00543217	0.0164612	0	0	0	0	0	0	0	0.00679677	0	0.0146211	0	0	0	0.00494142	0	0	0	0	0.024975	0	0.00570048	0	0.00159689	0.00546814	0	0	0	0	0	0	0.00154452	0	0	0	0
NvPIPlc : NV2.23846	0.00198525	0	0.00564597	0	0.114537	0	0	0	0	0.113824	0	0	0	0	0.037125	0.0646262	0	0.077529	0	0	0	0	0	0	0	0	0.00964499	0	0	0	0	0	0	0	0.00103227	0	0	0	0	0	0	0.0121891	0.0355701	0.00454573	0	0.0514986	0	0	0
NvMmanR-2 : NV2.9511	0.00376618	0	0.00618167	0.000536384	0	0	0.0530711	0.0200242	0.0167414	0.0698248	0.262276	0.073213	0.0296404	0.253609	0.379627	0.0428242	0.0190703	0.282817	0.0188725	0.0893599	0.277056	0.126964	0.3416	0.167414	0	0.186401	0.109665	0.28552	0.134673	0.229938	0.0426134	0	0.00479929	0.0882732	0.0421143	0	0.0257159	0.0144181	0.0899858	0.0356862	0	0.140129	0.0338711	0.0499237	0.0580497	0.0649429	0	0	0.15091
NvSOL-like-11 : NV2.16315	0.214157	0.0976454	0.0129648	0.00597341	0.0520033	0	0.291433	0.0999698	0.0349116	0	0	0.00177427	0.00255895	0	0	0	0.032074	0	0	0.0533157	0	0	0.0128839	0	0	0	0.00272461	0.0187846	0	0	0	0.00355824	0.033098	0	0.0202744	0.0084959	0.00592936	0.00577125	0.0317219	0	0	0	0	0.128038	0.00744189	0	0	0	0
NvPtprq-4 : NV2.13521	0	0	0	0	0	0	0	0.0363349	0.122932	0	0.00651059	0.0566574	0	0	0	0	0	0	0	0	0	0	0	0	0	0	0	0	0	0	0	0	0	0	0.00634558	0.0113065	0	0	0	0	0	0	0	0	0	0	0	0.00145565	0.0133547
NvDomCykR-3 : NV2.20819	0.0123108	0.00250073	0.00182128	0.00106832	0.0135261	0	0.0110577	0.0375026	0.0429195	0	0	0.00311236	0.0638488	0	0	0	0	0	0	0	0	0	0.0113184	0	0	0	0	0	0	0	0	0	0	0	0.000275009	0	0	0	0.00471018	0	0	0	0.00399414	0	0.0168578	0	0	0	0.0040494
NvEGF-repeat-35 : NV2.4783	0.0172722	0.0128065	0.0244897	0.00572017	0	0.216343	0.00855572	0.0104214	0.0171932	0.0255935	0.0232618	0.0303031	0.00303971	0.00707664	0.0111156	0	0	0	0	0.00761431	0.00592194	0.0442015	0	0	0.0175431	0	0.00344743	0.0095143	0.0218669	0	0	0.0154768	0	0	0.0355818	0.00938653	0.00589749	0.00382274	0	0.00266354	0	0	0	0.00347451	0.00174942	0	0	0.00818465	0.0647379
NvTlpB : NV2.21328	0.0328418	0.0854283	0.0485705	0.0161063	0	0	0	0.0194515	0	0.0516814	0.237014	0.132483	0.0694538	0.157534	0.121218	0.193096	0.0626002	0.311731	0.422579	0.117095	0.166521	0.208838	0.151697	0.0485338	0.172751	0.384425	0.0730613	0.0382285	0.109911	0.0708115	0.0989131	0.025321	0.156493	0.0375773	0.0581129	0.091569	0.070471	0.0551044	0.0425602	0.109148	0.0582377	0.0627606	0.184985	0.115294	0.0644868	0.0211258	0.107949	0.282205	0.0869393
NvFATPCad4-like-1 : NV2.8636	0.0912171	0.0770584	0.00982725	0.00624543	0	0	0	0	0	0	0	0	0	0	0	0	0	0	0	0	0	0	0	0	0	0	0.0274102	0	0	0	0	0.00134761	0	0	0.0373322	0.00498602	0	0	0	0.0106372	0	0	0	0	0	0	0	0	0.0388102
NvPolyEGF-Disc-4 : NV2.13802	0.00148269	0.00126144	0.000538926	0	0	0	0.00931056	1.50131	6.73175	0	0	0.00278331	0	0	0	0	0.0449697	0	0.0226841	0	0.00410645	0	0	0	0	0	0	0	0	0	0	0	0	0	0.0125103	0	0.00615424	0	0	0	0	0	0	0	0	0	0.0156554	0	0
NvWnt7b-1 : NV2.3609	0.0155948	0.0140717	0.0206123	0.0054759	0	0	0.00567186	0	0.359263	0	0	0.0172361	0.0615953	0	0.030525	0	0.00551283	0	0	0.156247	0.0834809	0.0159383	0.0113184	0.0490653	0	0	0.0448623	0.0169911	0.0458497	0	0	0.00271568	0	0	0.146522	0	0.0118428	0.0302126	0.0191661	0.00706059	0	0	0.0238899	0	0.0294672	0	0	0.00217974	0.0935714
NvCFP-1 : NV2.23465	0.0983135	0.0458313	0.27113	0.33878	0.105668	0	0.0172317	0.0162577	0	0.0917752	0.00683256	0.0326797	0	0.0104317	0.0946309	0	0.163138	0.212918	0.258946	0.304131	0.0815046	0.167784	0.0786094	0.232546	0.181226	0.0529186	0.25093	0.634217	0.291541	0.159566	0.045235	0.0441221	0.376107	0.290305	0.990752	0.0756352	0.774241	0.679025	0.185114	0.496134	0	0.291778	0.33249	0.0684346	0.191171	0.312312	0.0440167	0.475588	0.132329
NvPINLabA : NV2.11073	0.00126328	0	0.00481717	0.0619279	0	0	0.00967365	0	0.017297	0	0	0.0304249	0.00745386	0	0.206573	0.103605	0	0	0	0.0354854	0.0164554	0	0.0191872	0.0427406	0.0633408	0	0.0243436	0	0.0144009	0	0	0.0130239	0	0	0.00753153	0	0	0.00578414	0	0	0	0	0.0286491	0.0107537	0	0	0.0163811	0	0
NvSushiEGFZP-1 : NV2.12863	0.0186879	0.00990301	0.053619	0.0615651	0.120533	0	0	0	0	0	0.00683256	0	0.0283125	0	0.0256016	0	0.0498825	0	0.0140869	0.0563959	0.0343559	0.00828494	0.0820827	0.0504579	0.148297	0	0.0880175	0.129818	0.10383	0	0	0.00824081	0.0457634	0	0.274983	0.0213112	0.26953	0.235046	0.108349	0.122307	0	0.218479	0.0762477	0.0413829	0.00604085	0.0646648	0	0.00424719	0.0320859
NvSushiEGFZP-2 : NV2.12864	0.0426673	0.0299196	0.0834974	0.0523074	0.0186698	0	0	0	0	0	0	0	0	0	0.0165497	0	0.0623769	0.026602	0.0905997	0.0987946	0.0298363	0.0244284	0.0798721	0.0967279	0.145236	0.0690001	0.0568334	0.332552	0.135821	0.189036	0	0	0.0782802	0.098631	0.391987	0.0236297	0.279086	0.189676	0.117935	0.359404	0	0.105837	0.074061	0.0193813	0.00317545	0.0995593	0.0430852	0.138714	0.0325284
NvMfap4-5 : NV2.5873	0.0392005	0.0222562	0.013045	0.0273273	0.0182498	0.321792	0.0155273	0	0	0	0.0605034	0.167716	0.0286477	0.0143594	0.0512388	0.128962	0.0409872	0	0.233124	0.261569	0.0168149	0.313225	0.441628	0.10232	0.0605386	0.220312	0.110144	0.169949	0	0	0.0766916	0	0.0165926	0	0.0871598	0	0.00918613	0.222752	0.179136	0.0116259	0.0672405	0.0153552	0.0345467	0.0153217	0.0227359	0	0.00621223	0.034115	0.0981744
NvCFP-6 : NV2.13919	0.559343	0.959399	0.218629	0.0213852	0.0408899	0.390098	0	0	0	0.389345	0.0975808	0.508508	0.118621	0.276106	0.133742	0	0.00519444	0.037611	0.0577861	0.215985	0.120569	0.122803	0.184884	0.159189	0.171487	0.0922087	0.175039	0.194488	0.267678	0.414638	0.18817	0.0403497	0.0674836	0.0594391	0.328399	0.154083	0.173979	0.136643	0.155968	0.171582	0.107395	0.00393956	0.150867	0.0255231	0.03325	0.0780565	0	0.115423	0.508823
NvCoag-like 3 : NV2.19396	0	0.000859908	0.00614291	0	0	0	0	0	0.0161747	0	0.0946361	0.0166474	0.0472174	0	0	0	0.00628307	0	0	0	0	0	0.0186366	0	0	0	0	0	0.00675873	0	0	0.00842956	0	0	0.0130896	0	0	0	0	0	0	0	0	0	0	0	0	0	0.0781189
NvMep-17 : NV2.16036	0	0	0.000140168	0.000889045	0	0	0	0	0	0	0	0	0	0	0	0	0	0	0	0	0	0.0120722	0	0	0	0	0	0	0.460917	0	0	0	0	0	0.00734196	0	1.3837	0	0	0	0	0	0	0	0.166155	0	0	0	0
NvCpne-1 : NV2.137	0.130229	0.107439	0.0329917	0.0522317	0.0610993	0.172213	0.0274261	0.0107134	0.451718	0.0144935	0.0176938	0.0194162	0.0151784	0	0.136703	0.0152467	0.00421127	0.0159713	0.0588684	0.138035	0.053774	0.0391928	0.0584172	0.0445938	0.199387	0	0.0378215	0.0190202	0.117686	0.0861297	0.0851364	0.0363659	0.0607055	0.110138	0.121826	0.0186869	0.11573	0.106149	0.0407975	0.121577	0.416144	0.107732	0.0789649	0.157377	0.115073	0.0360259	0.308305	0.0860028	0.0381381
NvDomR : NV2.11373	0.00155799	0.000844457	0.000428996	0.0107663	0	0	0.00129686	0	0.0199414	0	0	0.00386224	0	0.00761765	0	0	0.0232138	0	0	0	0	0.0340013	0	0.0236634	0	0	0.0187231	0	0.20912	0	0.0171778	0	0.101874	0	0.0451561	0	0.109841	0.188757	0.113008	0.168984	0	0.0841508	0.0122116	0.0711504	0.0346326	0.376781	0	0.040691	0.0629854
NvDisc : NV2.997	0.00919352	0.000647245	0.00643885	0.00804155	0	0	0	0	0	0.00464181	0	0	0	0	0	0	0	0	0	0	0	0	0	0	0	0	0	0	0	0	0	0	0	0	0	0	0	0	0	0	0	0	0	0	0	0	0	0.0472019	0
NvCoag-related 4 : NV2.1284	0	0	0.0011178	0	0.055344	0	0.0131301	0	0	0	0	0	0.00330322	0	0	0	0	0	0	0	0	0	0	0	0	0	0	0	0	0	0	0	0	0	0	0	0.00246961	0	0.00885175	0	0	0	0	0	0.0102665	0	0	0	0
NvvWFAConA-3 : NV2.16343	0.0224602	0.00363567	0.00385809	0.0133422	0	0	0.0440431	0	0	0	0	0	0	0	0	0	0	0	0	0	0	0	0	0	0	0	0	0	0	0	0	0	0	0	0.000468047	0	0	0	0	0	0	0	0	0	0.0569415	0	0	0	0
NvvWFAConA-4 : NV2.16338	0.0618111	0.01611	0.0100086	0.0126878	0.389944	0	0.0382899	0.0516698	0	0.00920376	0	0	0	0	0	0	0	0	0	0	0	0	0	0	0	0	0	0	0	0	0	0	0	0	0.00534772	0	0	0	0	0	0	0	0	0	0.0111834	0	0	0	0
NvM28MMP : NV2.13120	0.451417	0.214973	0.194029	0.147323	0.0306674	0	0	0	0	0.0461706	0.0813127	0.227498	0.0925837	0.0697911	0.0386029	0.0456271	0.0404035	0.135903	0.034252	0.0998785	0.138663	0.0577887	0.0420097	0.0541646	0.0913718	0.0324461	0.113651	0.0944435	0.0479753	0.254405	0.0653718	0.0783822	0.0435631	0.0481529	0.202539	0.132762	0.106174	0.0185545	0.0520435	0.0257132	0.0371951	0.0578585	0.0427162	0.0666116	0.0295845	0.0210035	0	0.13638	0.288124
NvvWFAKz-1 : NV2.14043	0	0.00159499	0.00065068	0.00580928	0	0	0	0	0	0	0.12089	0.0136317	0	0	0	0	0	0	0	0.0204408	0	0.0561192	0	0.0250961	0	0	0.0721251	0	0	0	0	0	0	0	0.00102273	0.0657267	0	0.055965	0.0064519	0.00896729	0	0	0	0	0	0	0	0	0.0124126
NvPolyEGF-21 : NV2.21926	0.090424	0.0809107	0.0431786	0.0268248	0.055344	0	0.0343885	0	0.00513909	0.309692	0.0815504	0.238847	0.120128	0.124072	0.00713287	0	0.0708413	0.0476735	0	0.0120692	0.0746663	0.0831575	0.090811	0.0609994	0.0160117	0.0842171	0.0852507	0.0382134	0.0972267	0	0	0.0397233	0.0125173	0	0.0603237	0.0259023	0.118501	0.0525649	0.0352687	0.0948071	0.0293919	0.0613529	0.0187186	0.0305945	0.0517513	0.0107774	0.0482254	0.00290211	0.0965239
NvFnt-SEA2 : NV2.19078	0	0	0.00571121	0.0112846	0	0	0	0	0	0	0	0	0.140989	0	1.041	0.38908	0.0169158	1.04695	0.116252	0.0277693	0.190856	0.0438872	0.164689	0	0.099223	0	0.0944247	0.141204	0.0725983	0	0.0761794	0	0	0	0.00477588	0	0	0	0	0.00449639	0.147193	0	0	0	0	0	0	0.145169	0
NvLeuIg-1 : NV2.988	0.124746	0.108546	0.116337	0.182617	0.0328485	0	0.0212392	0.015606	0	0	0.0106663	0.0647751	0.00917606	0.0910195	0.130275	0.361445	0.260747	0.0847952	0.297186	0.0622439	0.341458	0.148991	0.0208603	0.0576686	0.0633408	0	0.0637898	0.073508	0.0366372	0	0	0.0465605	0.0316068	0	0.0896399	0.0493599	0.027855	0.0230349	0.0412369	0.0444222	0	0	0.113691	0.0439183	0.00802249	0	0.0155534	0.136792	0.112247
NvAdh-like-1 : NV2.21728	0.00218486	0.00181645	0.00387739	0.000586273	0	0	0	0	0	0	0.012626	0	0.0215602	0.0267405	0	0	0	0	0	0	0	0.00329197	0.0191872	0	0	0.199652	0.0122324	0.027826	0.0439244	0	0.0426134	0	0	0	0.00114545	0	0.00159689	0.0101947	0.0712799	0.0241754	0	0	0	0	0	0	0.0053337	0.196183	0.118184
NvAtrn : NV2.18302	0.120179	0.121643	0.0653361	0.0770311	0.109908	0.108171	0.0947935	0.0324755	0	0.0861963	0.0704974	0.187118	0.127359	0.158848	0.0533454	0.095249	0.168067	0.011215	0.293594	0.110858	0.0973034	0.11886	0.157326	0.0417706	0.228542	0.253811	0.16078	0.145464	0.0294494	0.0747049	0.0662904	0.040433	0.02391	0.0135059	0.0726841	0.125154	0.0458113	0.0280541	0.0885847	0.128629	0.220575	0.254838	0.0553081	0.00980944	0.0916664	0.0174598	0.0605667	0.217061	0.126359
NvBai-1 : NV2.10733	0	0	0.000573282	0.000502849	0	0	0	0	0.246897	0	0	0	0.00324507	0.0208633	0	0.0164186	0.415284	0	0.128057	0.112721	0.0324862	0.029735	0	0	0	0	0	0	0	0	0.0189119	0	0	0	0.0243537	0	0	0	0	0	0	0	0	0	0	0	0	0.00145565	0.0378826
NvWAPIgZP-2 : NV2.11632	0.0010445	0	0.00497322	0.00244175	0	0	0	0	0	0	0	0	0.00299348	0.0146912	0	0	0	0	0	0	0	0	0	0	0	0	0	0.00312049	0.00432275	0	0	0	0	0	0.0055172	0	0	0	0	0	0	0	0	0	0	0	0	0	0.0145322
NvPolyEGF-Disc-8 : NV2.9055	0.0186222	0.0128836	0.0101623	0.0054712	0.0385582	0	0.0212329	0.00861783	0	0.00749164	0.0194841	0.00892564	0.00691691	0	0	0	0	0	0.0140869	0	0.00777524	0.00221189	0	0	0	0	0	0	0	0	0	0.00177912	0.00716163	0.0135059	0.00342903	0.00703768	0.0161017	0	0.0253537	0.00522808	0	0.0110265	0	0.00204022	0.00611172	0	0	0.00439286	0.0071543
NvLamA1-like : NV2.22840	0.0432508	0.330943	0.0357858	0.00499567	0	0	0.0187144	0.0213934	0.0226414	0	0.120052	0.0216243	0.00748853	0	0.00451052	0.0246403	0.00785448	0	0	0.0179995	0.0230598	0.0438795	0	0.0349255	0	0.0689613	0	0.00639906	0.00332585	0	0	0	0	0	0.0294473	0.0204518	0.0192742	0	0	0.0264153	0.193013	0	0	0.0129139	0	0.023453	0.0881477	0.00439286	0.0040494
NvLamB1-3 : NV2.24823	0.174428	0.152297	0.0768147	0.030095	0.045271	0	0.0517534	0.00234233	0	0.0892973	0.0368072	0.0196554	0.00204244	0.0755977	0.0102982	0	0.0566192	0	0	0.0373141	0.0368217	0.0951192	0.0399733	0.00218156	0.103884	0.244024	0.0510565	0.123587	0.0909169	0	0	0.024022	0.0352161	0.0299998	0.0528466	0.0537651	0.0822349	0.0399167	0.00973947	0.0284756	0	0.00728231	0.0447987	0.0123494	0.00198242	0	0.016144	0.0857206	0.0231728
NvMfap4-6 : NV2.8818	0	0	0	0.00236912	0	0	0	0	0	0	0	1.57369	0	0	0	0	0	0	0	0.0255146	0	0.0678486	0	0	0	0	0	0	0	0	0	0.00694365	0	0	0.0373387	0	0	0	0.0298972	0	0	0	0	0	0	0	0	0.0169053	0
NvEys : NV2.6047	0.0892903	0.650045	0.100237	0.0433016	0.0946636	0.495983	0.0395743	0.369833	0.0193194	0.131571	0.118353	0.107024	0.0328722	0.0223088	0.00713287	0.0116174	0.0221078	0.0758461	0.0954508	0.102359	0.0335069	0.0767963	0.0115837	0.0581249	0.0175431	0.0975057	0.0097279	0.0315006	0.0580502	0.18296	0	0.0325744	0.00878619	0.154334	0.103406	0.197078	0.114421	0.0321248	0.0184108	0.0592934	0	0.123293	0.0355202	0.0358215	0.0722989	0	0.0413741	0	0.143434
NvPG-like : NV2.22783	0.0838867	0.0549157	0.0431862	0.0299786	0.142683	0	0.484318	0.0313659	0.0145163	0.0270519	0.0109964	0.142857	0.103912	0.503483	0	0.133225	0.0193621	0.0709286	0	0.0465672	0.129582	0.00778855	0.0950067	0.0483367	0.371512	0.0572122	0.0499379	0.0313899	0.013123	0	0	0	0.0141802	0.0708013	0.015371	0.0352347	0	0.244912	0.0616743	0.00389676	2.88735	0.0557818	0.198475	0.00602908	0.0121504	0	0.132942	0.00570284	0.129865
NvADAMTS-6 : NV2.1120	0.0586655	0.06378	0.0197394	0.034414	0	0.108171	0.00862818	0	0	0.034613	0.269725	0.23095	0.12099	0.0752513	0.0498941	0.123733	0.0114718	0.149719	0.129545	0.0746993	0.0987703	0.155493	0.233584	0.215468	0	0.320078	0.0454995	0.0607708	0.0945149	0.0462141	0	0.00987511	0.0323506	0.0566726	0.0333497	0.0984724	0.0188934	0.0478098	0.0222592	0.0145551	0.136497	0.0376031	0.0634821	0.00447668	0.0332412	0.0142333	0.122601	0.134835	0.0832539
NvAstacin-17 : NV2.5152	0.00340091	0.000239041	0.00122629	0.00155068	0.0264466	0	0.0158506	0.0162285	0.0172709	0.00662575	0	0	0	0	0.0263716	0	0.00551283	0	0	0	0	0.0141728	0	0	0	0	0.00688349	0.0187846	0	0	0	0	0	0	0.0125845	0	0.0180293	0	0	0	0.0672405	0	0.0135093	0.0115002	0	0	0	0	0
NvSEMA5B : NV2.11758	0.0917989	0.117122	0.0556274	0.0211931	0.0521615	0.108171	0.0719889	0	0	0.0466609	0.0261428	0.0264128	0.0538527	0.00847544	0.0151911	0.141826	0.143806	0.159496	0	0.1002	0.146205	0.0663613	0.208342	0.0527294	0.241476	0.348384	0.0621928	0.0845275	0.0339411	0.0756407	0	0.0156374	0.0815964	0.187888	0.0771066	0.0641877	0.0830282	0.0247577	0.0417975	0.0357474	0.0216657	0.0044591	0.0488073	0.0624935	0	0.0619394	0.0127593	0.19695	0.167531
NvSEMA-like-2 : NV2.22863	0.0842876	0.146623	0.0710407	0.0942155	0.162954	0.371863	0.0870187	0	0.00885551	0	0.154385	0.0948191	0.0677081	0.140972	0.116718	0	0.0787939	0.0674652	0	0.083488	0.0480404	0.0297563	0.0331671	0.0780023	0.30013	0.0808949	0.04739	0.0362351	0.0585118	0.230776	0	0.092139	0.0311859	0.0953416	0.0576842	0.00623456	0.0692012	0.0240264	0.0211176	0.0200255	0	0.022134	0.0397367	0.0830664	0.039536	0.0213271	0.114322	0.216791	0.0873238
NvFREP-9 : NV2.10046	0.000496808	0.00362668	0.00325239	0.000652654	0	0	0	0	0	0	0.00648519	0.0108324	0	0	0	0.0488234	0	0	0	0	0.00348803	0.0354185	0.233059	0	0	0	0.00688349	0	0.215343	0.0495874	0	0	0	0	0.0242161	0	0	0.0460214	0.00387373	0	0	0.102574	0	0.0226803	0.00390448	0	0	0	0.0115895
NvGDF : NV2.6489	0.0858413	0.197507	0.130675	0.0153695	0.020445	0	0.00482384	0	0.022464	0.0144943	0.0415834	0.0229147	0.0172116	0	0	0	0.0186812	0	0	0	0.00239928	0	0	0.0486728	0	0	0.0259585	0.044585	0.0391145	0	0.0700439	0.00637757	0	0	0.0671515	0	0.0837835	0.0185778	0	0.00744251	0	0.00387292	0.00606442	0.00189808	0.00102372	0	0	0	0.101258
NvFnt-2 : NV2.12498	0.0640708	0.089822	0.0149674	0.04844	0.175098	0.144388	0.0524616	0	0	0	0.00494391	0.0146594	0.0276361	0.123077	0.00412167	0	0	0.011215	0	0	0.0582299	0.0530273	0	0	0.150186	0	0.0158725	0	0.0128293	0	0.020733	0	0.011279	0	0.0305733	0	0.00572175	0.00851713	0.00449926	0.00583006	0	0.0683396	0.0394683	0.000949042	0.00402087	0	0.0083046	0.102958	0.0276353
NvCDH-3 : NV2.4921	0.298344	0.482579	0.140115	0.0319183	0	0.228885	0.00360423	0	0.0136198	0.106151	0.0500578	0.0784453	0.0243608	0.0160931	0.00412167	0	0	0.015712	0	0.0138655	0.0117657	0.12127	0.0662714	0.137102	0.0349582	0	0.0199197	0.0401246	0.0879201	0	0	0.0180981	0.0247311	0	0.130051	0.0375381	0.0879547	0.068872	0.101603	0.102831	0.0556836	0.0185637	0.102822	0.051202	0.0442918	0.0921357	0.00463653	0.0029113	0.024135
NvCpne-2 : NV2.4625	0.129737	0.13818	0.0413148	0.0991927	0.0290561	0	0.114891	0.0162408	0.0251765	0.027699	0.136833	0.0422229	0.0445039	0.0401169	0.0301285	0.0685307	0.0264547	0.0988937	0.034252	0.151514	0.0942708	0.0746581	0.104802	0.0850747	0.3294	0	0.0596229	0.0413399	0.0135584	0	0.0220214	0.0607926	0.0237152	0.0650991	0.0676651	0.0775301	0.054574	0.0328998	0.00806111	0.0104562	0.217008	0.0217448	0.0224587	0.024898	0.0365162	0.0115222	0.0619462	0.109886	0.171453
NvDomCykR-4 : NV2.23796	0.00510405	0.00215498	0.00493746	0.0144312	0.023609	0	0	0	0	0	0	0.0119249	0.00399299	0	0.00669434	0	0	0	0	0	0	0	0	0.0133435	0	0	0	0.0121234	0.0456724	0	0	0	0	0	0.023526	0	0.0614428	0.0520078	0	0.0274498	0	0	0.0265287	0	0	0.0142949	0	0.0278842	0.0145728
NvDscaml : NV2.22749	0.00121296	0	0.00997207	0.102291	0.0916078	0	0.0933144	0.0130097	0	0	0	0	0.00299691	0	0.0779222	0.0426141	0.256409	0.696784	0.132516	0	0.102084	0.0263253	0	0.0164897	0	0	0	0.406259	0.0799397	0	0	0.119109	0.0471422	1.2198	0.0261231	0.00351884	0.0338823	0.19928	0.151398	0.18058	0.26649	0.419784	0.58566	0.303487	0.185028	0.0312844	0.103069	1.10158	0.0441318
NvROR2-like : NV2.6768	0.011079	0.00111656	0.00667491	0.00180786	0.0385582	0	0	0	0.0128348	0	0.0279811	0.00347657	0	0	0	0	0	0	0	0	0.00483534	0	0	0	0	0	0	0	0.00348811	0	0	0	0	0	0.0104854	0	0.00863623	0.0139041	0.0101567	0	0	0.0214002	0	0	0	0	0	0	0
NvSpadh-like-2 : NV2.3538	0.108742	0.0701943	0.0389328	0.00733358	0.0462888	0	0	0	0	0.00990301	0.0348677	0.0512182	0.0024903	0.0290505	0.0251332	0	0.0064192	0	0.0709703	0.114615	0.0304946	0.00882124	0	0.0344304	0.0427614	0.0219375	0.0312018	0.00205704	0	0.0861297	0.0177607	0.0381792	0.00519751	0	0.0558232	0.0291967	0.0540012	0.0382458	0.0245875	0.00796115	0	0.00387292	0.00975634	0.000949042	0.00267334	0.0145999	0	0	0.0555557
NvStab2 : NV2.1696	0.216778	0.135934	0.0539335	0.0731181	0	0	0.386204	0.137604	0.0370261	0.103815	0.0330156	0.688778	0.116302	0.839152	0.0793532	0.25814	0.0332261	0	0.100908	0.171313	0.0502824	0.0680289	0.198737	0.138429	0.0976296	0.0236913	0.165263	0.181259	0.123221	0.153742	0.174948	0.126849	0.0413114	0.135588	0.0879604	0.0279455	0.0424407	0.1568	0.0593079	0.128875	0.0324328	0.0571122	0.222928	0.307067	0.202047	0.109433	0.186594	0.00764223	0.28481
NvSOL-like-5 : NV2.3167	0.103629	0.0828422	0.113198	0.0547051	0.0349899	0.781978	0.0281112	0.00355273	0	0.0144135	0.029887	0.0896127	0.0517118	0	0.0135281	0.082225	0.0549653	0.0720501	0.0661533	0.0536542	0.104902	0.0484021	0.0743973	0.0482232	0	0.0207326	0.0473235	0.0621715	0.0319395	0.0874462	0.0426134	0.010503	0.0201212	0.286353	0.047796	0.0338242	0.0259148	0.0182657	0.0223149	0.0294171	0.0293919	0.0485016	0.0483041	0.0131961	0.0403449	0.0432462	0.0750664	0	0.0783029
NvSOL-like-9 : NV2.13356	0.100255	0.0762638	0.119468	0.117762	0.0887936	0	0.0443871	0.00355273	0.00885551	0.0267561	0.0583488	0.115733	0.116121	0.0467105	0.17314	0.0321739	0.165469	0.195971	0.0334042	0.115364	0.157351	0.0667086	0.0459698	0.0121239	0.187575	0.0910949	0.127871	0.0692374	0.156861	0	0.0419064	0.0367602	0.046071	0.136042	0.103974	0.0484094	0.101606	0.197284	0.021373	0.079311	0.233551	0.00363345	0.0470228	0.0789506	0.0430983	0.0455382	0.111611	0.204666	0.0791851
NvLpxACol : NV2.11419	0.0735374	0.029685	0.00744932	0.0239112	0	0	0.144774	0.00808854	0	0	0	0	0	0	0	0	0	0	0	0	0.00178366	0	0	0	0	0	0.00829204	0	0.0619394	0	0.0401581	0	0	0	0.00553623	0.0300951	0	0.00753262	0	0	0	0	0	0	0	0	0	0.0017879	0
NvEGF-1 : NV2.10398	0	0	0.00302631	0	0	0	0	0	0	0.0563894	0	0.0792294	0.0302465	0	0	0	0	0	0	0	0.000904149	0.0245232	0	0	0	0	0.00272688	0	0	0	0	0	0.00878619	0	0.00592419	0	0.00554148	0.271169	0.0586131	0	0	0	0	0	0	0	0	0	0.0837189
NvAdhGPCR-E1 : NV2.20524	0.00333643	0.000952459	0.0142341	0.0113647	0	0	0.00492726	0	0	0.00718595	0.441929	0	0.00365054	0	0.0174046	0	0	0	0	0	0.00432046	0.224385	0	0.00214412	0	0	0.0216989	0.0500689	0	0	0	0.0122835	0.0265802	0	0.0703816	0.0327385	0	0	0.00956607	0	0.175261	0	0	0.02562	0.00486679	0	0	0	0.0308871
NvFib-like : NV2.10397	0	0	0.00446963	0.00421801	0	0	0	0	0	0.0143707	0	0.0705848	0.00963322	0	0	0	0	0	0	0.00236884	0	0.00256505	0.00511933	0	0	0	0	0	0.012051	0	0	0	0.00878619	0	0.00651696	0	0	0.0384606	0.0246952	0	0	0	0	0	0	0	0	0	0.0460686
NvMFGE-like-3 : NV2.15715	0	0.00195371	0.00467282	0.000693412	0	0	0	0	0	0.0205976	0	0.166281	0	0.0611958	0	0	0	0	0	0.0845816	0.000904149	0.0826517	0	0.46855	0.0311892	0	0.244532	0	0.657855	0.0702168	0	0	0.00519751	0	0.107984	0	0	0.0141752	0.00819497	0	0.090009	0	0	0	0	0	0	0.010415	1.72507
NvMFGE-like-4 : NV2.15716	0.00498972	0.00067932	0.00324073	0.00162002	0	0	0	0	0	0	0	0.00478801	0.0997337	0	0	0.0199665	0	0	0	0	0	0.106256	0	0.0558803	0	0	0	0	0.273458	0	0	0.00327656	0	0	0.0016128	0	0.00572175	0	0	0	0	0	0	0	0	0	0	0	0.315987
NvLamB1-2 : NV2.24496	0.121979	0.673141	0.110274	0.0813639	0.18574	0.154799	0.00729593	0	0.0509281	0	0.0692573	0.114349	0.098846	0.383889	0.077871	0.0558618	0.00586921	0.218849	0.0637125	0.0797259	0.0389989	0.082175	0.204683	0.159173	0.0160117	0.0190331	0.0882735	0.112844	0.0824112	0	0.230771	0.0346832	0.0267652	0	0.135046	0.10539	0.140396	0.0611805	0.0122077	0.00388289	0	0.19532	0.0371734	0.0295052	0.0517482	0.0328493	0.0237396	0.0895136	0.121712
NvMfap4-2 : NV2.25470	0	0.00174449	0.00207946	0	0	0	0.00146483	0	0	0	0	0	0	0	0	0	0	0	0	0	0	0	0	0	0	0	0	0	0	0	0	0	0	0	0	0	0	0	0	0	0	0	0	0	0	0	0	0	0
NvvWFA-WAP : NV2.11346	0.0201694	0.00756329	0.00445349	0.00725525	0	0	0	0	0	0	0	0	0	0	0.02925	0	0	0	0.066656	0	0	0.036914	0	0.0590012	0	0.0134142	0.0049071	0.0156348	0	0	0	0.0102285	0	0	0.00738907	0	0.0366612	0.0104475	0	0.0220135	0	0.0357154	0.00125537	0	0	0.0142572	0.0646511	0.00217974	0.0334733
NvvWFA-14 : NV2.11796	0.020273	0.0169198	0.0378906	0.017478	0.0786568	0	0.00275944	0	0	0.076803	0.0285592	0.0370964	0.0226392	0.0962742	0.118871	0.146349	0.101294	0.641727	0.109532	0.106367	0.0635502	0.10263	0	0.0435058	0.130658	0.270387	0.123318	0.186658	0.131053	0	0	0.119875	0	0.0418971	0.0381554	0.0542259	0.066043	0.075676	0.0179503	0.0748973	0	0.120385	0.0891778	0.0463304	0.0371389	0.130078	0.0230066	0.0572388	0.0843036
NvLecc-like-1 : NV2.22624	0.00316668	0.00305453	0.00626427	0	0.0132024	0	0	0	0	0.0137177	0	0.522755	0.0087124	0.261812	0.222724	0.137029	0.0242495	0	0	0	0	0.0570294	0.088556	0.0150933	0.0175431	0	0.248637	0	0.0442098	0.0626127	0	0.0113763	0	0	0.0396836	0	0	0	0	0	0	0	0	0	0	0	0	0	0.713484
NvLecc-like-2 : NV2.22626	0	0	0.000667588	0	0	0	0	0	0.0264506	0	0	0	0	0	0	0	0	0	0	0	0	0	0	0	0	0	0	0	0	0	0	0	0	0	0	0	0	0	0	0	0	0	0	0	0	0	0	0	0.0954229
NvADAM-2 : NV2.6771	0.144597	0.124893	0.0618717	0.0825556	0.232389	0.163854	0.0417671	0.00393326	0	0.0390808	0.117546	0.160573	0.14372	0.0553192	0.0102386	0.0638684	0.0773174	0.0846879	0.1992	0.100328	0.0532005	0.0456364	0.118239	0.0431317	0	0.0643246	0.0879955	0.0323802	0.0380878	0.047259	0.0464788	0.0568428	0.0496248	0.0687465	0.0509105	0.0465977	0.0300465	0.0265227	0.018238	0.029434	0	0.0193004	0.0164128	0.00941457	0.0476966	0	0.0294757	0.191538	0.0452804
NvADAM-4 : NV2.18385	0.0472269	0.033373	0.0417721	0.0552247	0	0.144388	0.0499949	0.0131628	0.0160054	0.0286211	0.104023	0.283953	0.179042	0.0695603	0.00390747	0.104984	0.118168	0.00732549	0.0652903	0.155902	0.179128	0.148786	0.1241	0.0576068	0.0565662	0.00836646	0.0870553	0.0800005	0.0545428	0	0.0189119	0.109187	0.034605	0.0725357	0.0479166	0.162422	0.022305	0.10947	0.0350413	0.0536181	0.0457519	0.154692	0.130238	0.0756965	0.0699361	0.00622634	0.364245	0.178319	0.00877908
NvCoag-like 4 : NV2.1635	0	0	0.00344637	0	0	0	0	0	0	0.00718595	0.00726065	0.00793787	0.020293	0	0	0	0	0	0	0.0211454	0	0.0274138	0	0.0225673	0	0	0.0293013	0	0.0146415	0	0	0	0	0.0299998	0.00713011	0	0	0	0	0	0	0	0	0	0	0.0148624	0	0.0184989	0.0623832
NvSerpin-1 : NV2.3266	0.0137941	0.0104292	0.00733183	0.00644627	0	0	0.00741954	0	0	0	0.0171586	0.00769482	0	0	0.0329396	0	0	0	0	0.0175456	0	0.0829746	0.0274318	0.0130237	0	0.0329759	0	0.035377	0	0.0809953	0	0.0114757	0	0	0.00613861	0	0.0187481	0.0203613	0	0	0	0	0	0.0168511	0.02616	0	0	0	0
NvAnnexin-1 : NV2.19402	0.110374	0.075223	0.0996463	0.0140725	0.0761156	0	0.0088686	0	0	0.352647	0.0142056	0.0348101	0.0988313	0.0404173	0.0602526	0.232516	0.156475	0	0.22245	0.156255	0.0646745	0.240362	0.391936	0.483536	0.281447	0.14956	0.490386	0.120241	0.952005	0.380178	0.296454	0.375486	0.0533454	0.292215	0.323334	1.08066	0.390859	0.0934648	0.00741059	0.0805897	0	0.220842	0.0266662	0.184764	0.187151	0.277106	0.305831	0	0.813249
NvAnnexin-3 : NV2.10289	0.133401	0.141616	0.0625505	0.104364	0.0627367	0.521249	0.128963	0.0526292	0.0669066	0.302909	0.00888301	0.0657409	0.0160157	0.254473	0.081219	0.0514382	0.10473	0.0499178	0.0939618	0.0548714	0.0845134	0.134808	0.0142535	0.17356	0.0894607	0.109608	0.0742436	0.0403808	0.0839725	0	0.107843	0.0377443	0.0621371	0.0650991	0.0762031	0.18655	0.0869782	0.133377	0.154401	0.138634	0.224902	0.112437	0.207437	0.114866	0.0843441	0.0307848	0.0145397	0.214991	0.0433682
NvAnnexin-4 : NV2.19403	0.0126704	0.00313916	0.0096522	0.000824306	0	0	0.0151659	0	0	0.0246455	0.0204038	0.0252666	0.0392474	0	0	0.0244026	0.038391	0	0	0.0247429	0.0074541	0	0.105369	0.0814551	0	0	0.0276236	0.0115241	0.104018	0	0.0305355	0.0255867	0	0.172301	0.0368608	0.0911001	0.0776287	0.00596115	0.0214596	0	0.0155294	0	0.0702495	0.0333467	0.0153505	0.0153928	0.0251476	0	0.107228
NvAnnexin-5 : NV2.19404	0.0172629	0.012042	0.0140951	0.00475907	0	0.124521	0.00669583	0	0	0.107051	0.0152552	0.00212611	0	0	0	0	0.012827	0	0	0	0	0.0723947	0	0.11299	0.165791	0	0.0965216	0.00563168	0.143032	0.140252	0.0189119	0.00955652	0	0	0.0410447	0.126077	0.120893	0	0	0.063418	0	0	0.00222952	0.00412681	0.0337591	0.0384871	0.0313109	0	0.0599792
NvCTLD-1 : NV2.7430	0	0.000687504	0.00268645	0.00460132	0	0	0	0	0	0	0	0.154958	0.00661395	0	0	0	0	0	0	0.106636	0	0.101817	0.0089707	0	0.0633408	0	0.0814991	0	0.641591	0.21065	0.506004	1.71978	0	0	0.0777225	0	0	0.0123386	0.242177	0.460223	0	0	0	0	0.0278823	0	0	0.0468375	0.360289
NvNADPH1-1 : NV2.27	0.00345022	0.00258982	0.00311433	0.122156	0	0	0.00715001	0	0	0	0	0	0	0	0	0.0191304	0.00810025	0.0283223	0	0	0.0102195	0.0193389	0	0	0	0	0.0192576	0.0119874	0.044462	0.0879415	0	0.00588076	0	0.13195	0.0350198	0	0.0306514	0.0116501	0	0.0199279	0	0	0	0.0109094	0	0.036075	0	0.048618	0.0248727
NvMAMCTLD-2 : NV2.23715	0.00374738	0.000235806	0.000133149	0.00627253	0	0	0.00678751	0.00552596	0	0	0.0914155	0	0.0763207	0	0.0737551	0	0	0.0425923	0	0	0	0	0	0	0	0	0	0	0.0958723	0	0	0	0.00479929	0	0.00234692	0	0	0.0122488	0	0	0	0	0	0	0	0.00320262	0	0	0
NvSel-related-2 : NV2.17145	0.000617352	0	0.000106596	0	0.023609	0	0	0	0	0.0172251	0.0144299	0.00724873	0.00794329	0	0	0.0402875	0.0181412	0	0	0.0924263	0	0.0335895	0.0107661	0.0164307	0	0	0.00242296	0.0314614	0.00879254	0.214601	0	0.0441881	0	0	0.00961667	0.0841792	0	0	0	0	0	0	0	0	0	0	0	0	0.0418614
NvFREP-1 : NV2.1244	0	0	0.00241675	0.00022893	0	0	0	0	0	0.0062554	0.0304471	0.208142	0	0	0	0	0	0	0	0	0.000904149	0.0927194	0.273125	0	0	0	0	0	0.0033352	0	0	0.0302866	0	0	0.0110635	0.0100136	0.0259794	0.0129091	0.00598149	0.0229316	0	0	0	0	0	0	0	0	0.203002
NvFREP-22 : NV2.7679	0.0021125	0	0.000248226	0	0	0	0	0	0	0	0.00929168	0.0378135	0.00252318	0.0306339	0	0.0827541	0	0	0	0	0	0	0	0.0127258	0	0	0	0	0	0	0	0	0	0	0.00800165	0	0	0.00361163	0	0	0	0	0	0	0	0	0	0.0256549	0.170266
NvFREP-28 : NV2.25688	0	0	0.000540934	0	0	0	0	0	0	0	0	0.0150664	0.00621918	0	0	0	0	0	0	0	0.0110146	0	0	0	0	0	0	0.0181209	0.0128293	0	0	0	0	0	0	0	0	0	0	0	0	0	0	0	0	0	0	0.00259448	0.0924787
NvFREP-3 : NV2.6245	0.00290056	0	0	0	0.156848	0	0.00324345	0.00437407	0	0	0	0.00381773	0	0	0.0312735	0	0.0126366	0	0	0	0	0	0.096526	0.156616	0	0	0	0	0.107763	0	0	0	0	0	0.00645668	0	0.446422	0.302006	0.122823	0	0	0.00393956	0.0170704	0	0	0.006761	0	0	0.0156972
NvWnt8b-2 : NV2.5661	0.00613041	0.00261114	0.00809211	0.0203649	0	0	0	0.00956407	0	0	0	0.012866	0	0.0386937	0.0948982	0.105758	0.010136	0	0.212025	0.0173693	0.0653386	0.0289395	0.0107661	0	0	0.036523	0	0.0114367	0	0	0	0	0	0	0.00169807	0	0	0	0	0	0	0	0	0.0154231	0.0193681	0	0	0.0924437	0.0447067
NvCrumbs-like-4 : NV2.10727	0.00491631	0	0.010158	0.0038725	0.058835	0	0.0340529	0.00770891	0.0156879	0	0.0460532	0	0.0475964	0.0146912	0.0513039	0.120054	0.0473151	0	0	0.0219983	0.00487004	0.0182682	0	0.0111259	0	0	0.0299383	0.00604599	0.00637008	0	0	0	0	0	0.00430914	0.0154537	0	0	0	0	0	0	0.00868558	0	0	0	0	0	0.0186679
NvCub-1 : NV2.2825	0.015401	0.0241197	0.00900534	0.0121426	0	0.161249	0.00245517	0.012978	0	0.0438568	0	0.00883102	0.00805927	0	0.00713287	0	0	0	0	0.0387631	0.00900118	0	0.0304859	0.0199696	0	0	0.0242939	0.0448347	0	0	0	0.00347182	0	0	0.0139865	0.0329446	0.032957	0.00136077	0	0.0452726	0	0.318572	0.0161246	0	0.00549933	0	0	0.0169494	0.284863
NvRyn1 : NV2.17096	0.000638228	0	0.00585242	0.0158931	0.0186698	0.154799	0.0170465	0.0278259	0	0.57352	0	0.106871	0.35377	0.232162	0	0.422519	0.284175	0	2.19152	0.0463295	0.110766	0.151334	0.456804	0	0	0.110711	0.411202	0.0200758	0.0482905	0	0	0	0	0.114827	0.197895	0.0191607	0	0	0	0	0	0	0.00950594	0	0	0	18.0921	0	0.0810188
NvRyn4 : NV2.4953	0.0270559	0.0488673	0.0129821	0.00294669	0	0	0.00956203	0.0160409	0	0	0	0.00355369	0.013467	0.0278606	0	0	0.0131845	0	0	0.0253529	0.0183628	0	0	0	0	0	0	0.00599369	0.00892487	0	0	0	0	0	0.00376523	0.0220208	0	0.0137434	0	0	0	0	0	0.00617316	0	0	0	0	0.0104957
NvTRP : NV2.10225	0.345175	0.201596	0.121238	0.0634158	0	0	0.00748926	0.0838257	0	0.0140134	0.12089	0	0.0368515	0.0104317	0	0.198409	0.143062	0.299096	0	0.145979	0.12471	0.0396646	0.076478	0.0198299	0.0229824	0.0666347	0.0665656	0.0378249	0.0202862	0	0.0545673	0.0682974	0	0.0791015	0.158447	0.0883722	0.00870475	0.00539005	0.0644895	0.00924498	0	0	0.0131418	0.00265111	0.0241684	0.118788	0.0081036	0.0841823	0.0242472
NvAdhGPCR-2 : NV2.1634	0.0358944	0.0231252	0.00691985	0.00611586	0.0524087	0.228885	0	0.322764	0.0742104	0.0062554	0.0185031	0.034125	0	0	0	0	0.014691	0.029682	0	0	0	0.0648274	0.0464996	0.089226	0	0	0.0331728	0.00539017	0.0183451	0	0	0.00432394	0	0.0949073	0.0447883	0	0.0442062	0.00708761	0.0273102	0	0	0.00387292	0.0107612	0	0	0	0	0	0.0808945
NvAdhGPCR-4 : NV2.743	0.0275751	0.013714	0.0396997	0.00399151	0	0.228885	0.0238795	0.0061436	0	0.42443	0.161308	0.130847	0.272487	0.00707664	0.103393	0	0.129641	0.0264209	0.0143239	0.0803899	0.031519	0.146177	0.360415	0.208051	0.552582	0.450309	0.256061	0.2595	0.441194	0.249114	0.063515	0.262487	0.0453009	0.196589	0.104971	0.0626364	0.260018	0.53866	0.276501	0.243892	0.0975396	0.19111	0.0485767	0.359454	0.207342	0	0	0.123022	0.389435
NvAntxR-1 : NV2.5700	0.0428121	0.0323517	0.0500218	0.174796	0.033548	0	0.0185076	0.00961908	0.0154971	0.0290837	0.00698938	0.0188133	0.0213739	0.0169883	0.0552064	0.158572	0.0862554	0.206956	0.263129	0.0902849	0.144044	0.0465849	0.121757	0.13561	0.0311892	0.0478185	0.199937	0.0718658	0.0991527	0.117763	0	0.0674875	0.162476	0.094538	0.0709557	0.0203404	0.1011	0.118388	0.0425507	0.170151	0.34392	0.152304	0.225706	0.107149	0.120276	0.0491876	0.070782	0.335801	0.205139
NvCD34-1 : NV2.17446	0	0.00162441	0.00429733	0.00180875	0	0	0	0	0	0.123697	0.0263547	0.0728398	0.0189573	0	0.0312735	0	0	0.0676609	0.0140869	0.0302381	0	0.0154387	0.0208603	0.115988	0	0.0552926	0.0125309	0.113992	0.0300556	0.13803	0.137432	0.081361	0	0	0.0212463	0.0408634	0.108065	0.130214	0.138751	0.179083	0.0894775	0	0.0536591	0.0107755	0	0	0	0.0339303	0.0337881
NvCykR-7 : NV2.9493	0.0549182	0.036276	0.0206112	0.0159307	0.0464224	0.154799	0.038456	0.0580496	0	0.0627692	0.0710373	0.0508987	0.00347096	0	0.0270563	0.0203998	0.05701	0.0239629	0	0.0387991	0.0399594	0.0186043	0.0387837	0.0145482	0	0.122405	0.0657822	0	0.0330642	0	0	0.0287817	0.00534559	0.0754731	0.0184391	0.0416772	0.0809203	0.00956423	0.0260376	0.0621034	0	0	0.0275423	0.0308127	0.0169354	0	0.00593315	0.0904763	0.0067923
NvPolyEGF-Disc-2 : NV2.3396	0.00493762	0.00644372	0.00929026	0.0104127	0	0	0.0155239	0.0183988	0.04822	0	0.00683256	0	0	0.0304646	0.0195588	0	0.00593834	0	0	0.0219178	0	0.0141133	0.0191872	0	0	0	0.0278603	0.0378408	0.00900058	0.12269	0	0	0	0.0566046	0.00866482	0.0052751	0.00364465	0.00991568	0.00316402	0.045553	0	0.00779031	0.0525113	0	0.00294007	0	0.00621223	0.0513151	0.0101054
NvPolyEGF-19 : NV2.5536	0.000851352	0	0	0	0	0	0	0	0	0	0	0	0	0	0	0	0	0	0	0	0	0	0	0	0	0	0	0	0	0	0	0	0	0	0	0	0	0	0	0	0	0	0	0	0	0	0	0	0
NvIgCam-3 : NV2.15289	0.0800477	0.061236	0.0373499	0.0435346	0.123345	0	0.135597	0.0416873	0	0.0567032	0.0572242	0.0977916	0.0518823	0.0756498	0.0444536	0.0393241	0.097578	0.220535	0.153366	0.192371	0.104788	0.0485487	0.105833	0.0873699	0.215178	0.149915	0.0710348	0.0619013	0.128625	0	0.0737506	0.0950386	0.0825896	0.11541	0.0888286	0.123033	0.015616	0.0906527	0.020346	0.0380226	0.0457519	0.0119341	0.0807536	0.0267891	0.106132	0.0594832	0.0321481	0.0249639	0.205748
NvIgCam-6 : NV2.21855	0.258185	0.112417	0.0487482	0.00996577	0.033548	0	0	0	0	0.00881528	0.00651059	0.0334706	0	0.0331302	0.0135281	0.0488234	0.0405082	0.0355215	0.0338685	0.0349341	0.00378337	0.0338316	0.0441326	0.0363978	0.241553	0.159876	0.0077329	0.00299825	0.00263995	0.0879415	0.169723	0.0731872	0.0159845	0	0.0518507	0.247092	0.00660782	0.0036851	0.0255679	0.00266354	0.0324328	0	0.0152877	0	0	0	0	0	0.0613408
NvIgCamZP : NV2.21903	0.22436	0.216208	0.0688317	0.0318537	0.0736827	0.108171	0.0906572	0	0	0	0	0.00929031	0	0	0.0134873	0.0181839	0.00924326	0.0840521	0	0.0274518	0.0457473	0.0375966	0.031795	0.0226362	0	0.0289245	0.0180597	0.0394827	0	0	0.0525569	0	0	0.0266049	0.0743064	0	0.0160233	0.023455	0.00643413	0.0569077	0	0	0.0903101	0	0	0.0315776	0	0.0296508	0
NvLRP-Polydom : NV2.788	0.00258555	0.000494854	0.00248138	0	0	0	0.0249058	0	0.017232	0	0	0	0.011497	0.0992556	0.00449802	0.0181839	0.00751848	0	0.0453681	0.0441444	0.116212	0.0577786	0.472239	0.010782	0	0	0.0897812	0	0.0160137	0	0	0	0.0284584	0.0473162	0.03038	0.0136557	0.0226208	0.016469	0.00426832	0	0.0623092	0	0	0.00408043	0	0.006761	0	0.0136466	0.506073
NvLRP1/2 : NV2.12145	0.0482719	0.0417595	0.0352396	0.0580437	0.0264466	0	0.0396893	0.00221331	0	0	0	0.0159392	0.00378295	0	0.02925	0	0	0	0	0	0.00422452	0.00195565	0	0	0	0	0	0	0.0202423	0	0.0571128	0.00491516	0.034306	0.0229654	0.0203682	0.0459377	0.0533061	0.0125283	0.0147948	0.00424887	0	0	0	0.00904896	0.0193681	0	0.00634651	0.0934737	0
NvNCAM-1 : NV2.21158	0.0522121	0.0276113	0.0314369	0.0654095	0	0	0.202523	0.0766931	0.581555	0.0547584	0.0240055	0.0650018	0.00965921	0.0415953	0.00974735	0.0408183	0.0319184	0.210423	0	0.04647	0.0407627	0.0753688	0.0353201	0.00742201	0.181107	0.0572122	0.0796464	0.0328469	0.0542332	0	0.0608184	0.00667086	0.046673	0	0.0610034	0.0648435	0.0208278	0.0251962	0.0619439	0.0599075	0.162338	0.0778259	0.0308068	0.0352063	0.0155593	0.0987128	0.132615	0.0866337	0.0703788
NvNrxn-like-2 : NV2.17148	0.000928218	0.000662031	0.00015627	0.0263841	0	0	0	0.00490101	0	0	0	0	0	0	0	0	0	0	0	0	0.0103147	0	0	0	0	0	0	0	0	0	0	0	0	0	0.0221665	0.00556656	0	0	0	0	0	0	0	0	0	0	0	1.22997	0
NvNrpTol1l-like : NV2.14795	0.104076	0.106458	0.138264	0.0846667	0.0647766	0	0.0239632	0	0	0.280124	0.146848	0.11082	0.117688	0.0222988	0.0457197	0.142333	0.229554	0	0.106125	0.317562	0.187135	0.145346	0.155594	0.0963867	0.0605386	0.0380234	0.259913	0.159126	0.101696	0.195674	0	0.0148782	0.124813	0.575279	0.0896265	0.0179209	0.184328	0.0783805	0.0721774	0.15923	0.0672405	0.0520939	0.062903	0.0615912	0.0367674	0.0229379	0.0230066	0.0667807	0.155209
NvSnaclec-like-1 : NV2.25143	0.0848779	0.0586877	0.0833914	0.0247863	0.0159917	0.163854	0.00266129	0	0	0.0664095	0.0453147	0.255287	0.038901	0.148416	0.0601506	0.0556277	0.00346296	0.0426795	0	0.143388	0.0366313	0.0465367	0.0505739	0.0145482	0.170403	0	0.124808	0.0176895	0.00920925	0	0.158867	0.107245	0.0119594	0.163085	0.0822598	0.205307	0	0	0	0.056813	0	0	0.0214024	0	0	0.0987128	0.0352533	0.00806733	0.0349658
NvSOL-like-4 : NV2.3066	0	0	0.00052071	0	0	0	0	0	0.00747825	0.0109507	0	0.00539742	0	0.022887	0	0	0	0.109689	0	0	0	0.0529767	0	0	0	0	0	0.015102	0.0151361	0	0	0.00794913	0	0	0.0106687	0	0	0	0	0	0.0266752	0	0	0	0	0	0	0	0.26437
NvVgtR-like-1 : NV2.12147	0.0143644	0.0299112	0.0279248	0.0445457	0	0.321792	0.0246504	0	0	0	0	0	0.00156184	0.0259437	0	0	0.00541467	0.0269182	0	0	0.00927499	0	0	0	0	0	0	0	0.0301365	0	0	0.0047527	0.011279	0.222383	0.0021346	0	0	0.0273486	0	0	0	0	0	0.00123829	0.00315694	0.0107289	0.0793512	0.00897968	0
NvPolyEGF-10 : NV2.3706	0.00663211	0.0154102	0.00591893	0.0132834	0	0	0	0	0	0	0.0138741	0.00310133	0	0	0	0	0.00862155	0.011215	0.0709703	0.0573107	0.0240842	0	0.0191872	0	0	0.0528698	0.0497656	0	0.0107744	0	0	0.0484905	0.0133385	0	0.0299112	0.0395482	0	0.0358805	0.0124549	0.00439705	0	0.0475143	0.0077925	0	0.0016904	0.01473	0	0.0136772	0.0324709
NvCFP-4 : NV2.11945	0.000702523	0.000786616	0.00299655	0.0137481	0	0	0	0	0	0.0199432	0.0999926	0.140066	0.0335186	0.260971	0.17213	0.10324	0.143814	0.120093	0.0668083	0.367374	0.439335	0.246215	0.274414	0.106726	0.235607	0	0.389932	0.0675169	0.114786	0.50505	0.0652676	0.0617586	0.0328208	0	0.201095	1.40125	0.109088	0.00574744	0.0203971	0.0296053	0.0999004	0.188781	0.134282	0.140428	0.130541	0.0710946	0.0167919	0.386842	0.136769
NvCspd-like : NV2.11760	0.000652386	0.00244644	0.0136593	0.000493729	0	0	0	0	0	0	0	0	0	0.0999001	0	0.0244117	0	0	0	0.0840042	0.00811779	0.0120634	0.0442174	0	0	0	0.0517828	0.0649306	0.0236337	0.443404	0	0	0	0	0.0316936	0	0.00963272	0	0.00676239	0	0	0	0	0	0	0	0	0	1.44155
NvMMP-11 : NV2.19316	0.0250221	0.0133684	0.0280551	0.0354028	0.0102225	0	0	0	0	0.276442	1.38192	0.759416	0.11357	0.0253537	0.0282502	0	0.0418074	0	0	0.294132	0.0308636	0.303538	0.203342	0.430867	0	0.0170798	0.25444	0.180352	0.302158	0.175101	0.0284667	0.141091	2.39155	0	0.443147	0.0147511	0.158338	0.605767	0.744111	0.196418	0	0.641536	0.829125	35.8771	11.4207	1.17325	0	0.0178447	0.039905
NvPkd1-like-1 : NV2.4979	0.00347782	0.00122355	0.00239247	0.00130632	0	0	0	0.0204573	0	0.812128	0	0	0.00962291	0.00761765	0	0	0	0	0	0	0.0055324	0.00335446	0.0274318	0.00616966	0.0605386	0.556391	0.0731966	0.0137781	0.00281229	0	0	0	0.0490564	0	0.00851631	0.00811993	0.636888	0.0113512	0	0	0	0	0.0216268	0.251955	0.0054171	0.0782787	0	0	0.014736
NvCRELD2 : NV2.1170	0.128684	0.327433	0.250277	0.237386	0.386354	0.163854	0.294606	0.171235	0	0.944624	0.231251	0.235222	0.324456	0.937974	0.223371	0.0681039	0.0389417	0.07284	0.0648798	0.121391	0.250518	0.304188	0.120609	0.376943	0.180343	0.0764152	0.244765	0.441582	0.595979	0	0.201875	0.328446	0.684205	0.231617	0.266679	0.342428	0.737991	0.555413	0.727549	0.240119	0.180765	2.16107	0.242249	0.906492	0.927483	1.6549	0.462877	0.196896	1.06506
NvFnt-3B-like : NV2.22291	0.0293696	0.0351841	0.0717912	0.0970421	0.0833951	0	0.216348	0.239575	0.0837733	0.670466	0.360848	0.324452	0.380641	0.135294	0.265535	0.20637	0.209629	0.203321	0.59836	0.127382	0.164364	0.474506	0.230406	0.261291	0.499019	0.0654726	0.274057	0.192535	0.200651	0.229018	0.0511331	0.170672	0.255941	0.0135059	0.122982	0.399892	0.311709	0.101894	0.254856	0.219731	0	0.268776	0.240612	0.243511	0.345852	0.169545	0.242793	0.231484	0.203595
NvvLDL-1 : NV2.1025	0.118302	0.08682	0.0968774	0.080413	0.204508	0	0.270537	0.176447	0	0.0594375	0.105027	0.0789241	0.0883848	0.299757	0.0874792	0.124103	0.194806	0.101629	0.138535	0.21873	0.201584	0.211092	0.25194	0.14218	0.0897047	0.232389	0.113653	0.201554	0.228688	0.225664	0.168483	0.117104	0.132084	0.0588734	0.0820223	0.0911606	0.109675	0.157892	0.0517485	0.135261	0.32789	0.231089	0.11355	0.0695683	0.102718	0.0231339	0.436207	0.235795	0.225696
NvvLDL-3 : NV2.9849	0.0437219	0.0298393	0.20576	0.330027	0.131562	0.252559	0.173919	0.0600807	0.00848217	0.430976	0.150245	0.209449	0.0995682	0.0960282	0.102244	0.327134	0.211673	0.0368759	0.310827	0.158256	0.296774	0.302403	0.137373	0.168397	0.133006	0.263089	0.132799	0.292582	0.17449	0.194647	0.371598	0.37647	0.0690672	0.06744	0.19397	0.10862	0.263789	0.0701366	0.185354	0.219588	0.331487	0.286852	0.224436	0.332655	0.134568	0.0950439	0.186245	0.344381	0.240306
NvAnnexin-2 : NV2.9562	0.403672	0.374616	0.161676	0.154609	0.0569984	0.108171	0.210048	0.13641	0.0960864	0.381447	0.729803	0.633234	0.371691	0.607962	0.357651	0.43116	0.512202	0.0638754	0.381845	0.617221	0.364561	0.332699	0.378481	0.317133	0.37026	0.527417	0.653158	0.326477	0.386909	0.50181	0.208775	0.379707	0.162394	0.153132	0.377808	0.262927	0.244563	0.148845	0.220305	0.313178	0.38174	0.0835037	0.271533	0.135396	0.15395	0.0401993	0.0906645	0.582385	0.357577
NvCol4b : NV2.21409	0.377516	0.273291	0.201189	0.280058	0.415466	0	0.304456	0.082221	0.106786	0.0420728	0.195079	0.485492	0.300271	0.538407	0.329969	0.295923	0.328026	0.0817651	0.419606	0.421253	0.314381	0.455843	0.436912	0.225777	0.354883	0.117142	0.29352	0.205576	0.237401	0.0747049	0.271742	0.182737	0.23505	0.292697	0.197027	0.150315	0.305473	0.256708	0.187124	0.258937	0.129351	0.328185	0.295171	0.340077	0.195888	0.132939	0.445371	0.332205	0.362685
NvCUB-Ig : NV2.10732	0.00854058	0.00629636	0.0285263	0.0210224	0.0771165	0	0.0822935	0.00677654	0	0.247904	0.316718	0.687044	0.454451	0.516101	0.331678	0.186632	0.519931	0.245434	0.139956	0.430447	0.544527	0.671701	0.572325	0.355407	0.416653	0.693285	0.443911	0.449172	0.468695	0.956879	0.0517798	0.283113	0.0787371	0.635981	0.238421	0.139468	0.255236	0.181561	0.175714	0.361939	0.241198	0.114009	0.381294	0.130861	0.103407	0.199978	0.158746	0.729252	1.17524
NvCUB-misc-5 : NV2.3067	0.589579	0.55952	0.36033	0.278623	0.34573	0.108171	0.0927143	0.0137331	0	0.305689	0.318504	0.75883	0.642611	0.93911	0.448565	0.67756	0.650282	0.758491	0.669824	0.638734	0.811103	0.410271	0.921199	0.530204	0.96476	0.600707	0.885439	0.558875	0.407759	0.68009	0.351209	0.520251	0.272209	0.255428	0.601419	0.313503	0.787916	0.499353	0.368778	0.507451	0.290226	0.636144	0.413352	0.296173	0.14048	0.183365	0.124066	1.13527	0.701967
NvDll-like 2 : NV2.20616	0.291316	0.227985	0.814902	0.406915	0.184516	0.226244	0.108562	0	0.022464	0.118374	0.210963	0.179615	0.241789	0.261225	0.113276	0.0235322	0.201875	0.0998155	0.155814	0.420054	0.168105	0.177309	0.20834	0.20556	0.0876812	0.267729	0.265663	0.0807632	0.326993	0.139634	0.649186	1.74507	0.129165	0.145814	0.260448	1.88487	0.24743	0.254627	0.0940961	0.212644	0.471206	0.0661177	0.101539	0.10744	0.0280786	0.386409	0.0662025	0.168326	0.36084
NvDMBT-1 : NV2.14958	0.216074	0.239542	0.0611261	0.0892857	0.0102225	0	0.119282	0.149661	0.812124	0.170822	0.343718	0.740412	0.443073	0.354659	0.282605	0.407502	0.207837	0.819464	0.340134	0.271458	0.335859	0.232308	0.184193	0.413662	0.324179	0.384571	0.387001	0.282966	0.244608	0	0.0480899	0.0848556	0.0822654	0.295584	0.125835	0.163297	0.25013	0.0858004	0.111909	0.203563	0.0366126	0.282448	0.199933	0.33123	0.136449	0.135357	0.504137	0.133813	0.329223
NvFrazz : NV2.14222	0.204753	0.230323	0.203605	0.337906	0.033548	0	0.0948828	0.016498	0.022464	0.310622	0.434551	0.400269	0.413237	0.50704	0.213884	0.375054	0.367511	0.402431	0.72516	0.646666	0.623448	0.785237	0.563591	0.374143	0.750939	0.0922229	0.432494	0.400446	0.243543	0.580146	0.180428	0.168078	0.235794	0.302162	0.351351	0.474021	0.216563	0.172212	0.223921	0.271491	0.0951727	0.355603	0.135642	0.179277	0.149312	0.274686	0.3236	1.40697	0.234516
NvNCAM-like-2 : NV2.20308	0.263178	0.369778	0.40226	0.339088	0	0	0.00530917	0.0275502	0.0370358	0.388188	0.241511	0.230393	0.242283	0.185184	0.504078	0.214586	0.252888	0.285168	0.328393	0.258675	0.416453	0.294691	0.294264	0.0741959	0	0.358476	0.261993	0.340399	0.244058	0.160616	0.145028	0.0678368	0.447012	0.359233	0.198248	0.29673	0.27957	0.11856	0.0648385	0.366685	0.128041	0.104298	0.242458	0.0846208	0.184265	0.126063	0.237944	0.0998708	0.138506
NvNCAM-related-1 : NV2.22495	0.459712	0.478109	0.2044	0.0534343	0.233512	0	0.252008	0.0815903	0.04103	0.0490451	0.112853	0.37069	0.187778	0.187614	0.329252	0.0321739	0.183425	0.357474	0.159961	0.291426	0.202447	0.150632	0.144448	0.115387	0.177588	0.223659	0.223272	0.0889313	0.165428	0	0.109052	0.192679	0.079476	0.194843	0.188051	0.322498	0.134478	0.0970594	0.112748	0.192091	0.366252	0.129492	0.119621	0.083628	0.0410769	0.0403869	0.0956158	0.00600794	0.185688
NvNrxn : NV2.11326	1.18107	1.07342	0.453069	0.18029	0.0132024	0.228885	0.00948423	0.00227064	0	0.258663	0.0713064	0.229449	0.0745438	0.19959	0.113906	0.2895	0.13237	0.197659	0.169965	0.229412	0.197204	0.215944	0.067388	0.0982683	0.331169	0.0900039	0.163212	0.215839	0.031267	0.108655	0.389291	0.15165	0.0937292	0.215952	0.371553	0.150137	0.204656	0.0405355	0.045876	0.127844	0.0293919	0.160545	0.0499991	0.000949042	0.0633086	0.01473	0.107755	0.0966741	0.0741852
NvScara1-like-4 : NV2.24169	0.280281	1.00814	0.349196	0.259584	0.05978	0.585396	0.289119	1.04427	0.0910999	0.374323	0.168828	0.0843465	0.111681	0.142367	0.262861	0.253138	0.283298	0.223229	0.35652	0.416318	0.22531	0.203744	0.309502	0.374235	0.450116	0.331883	0.601887	0.471151	0.259821	0.573993	0.362875	0.180229	0.183281	0.14836	0.298556	0.307667	0.377799	0.259209	0.323908	0.478989	0.40436	0.511598	0.47223	0.380853	0.239064	0.191732	0.310205	0.117518	0.139838
NvSOL-like-3 : NV2.1288	0.38228	0.310597	0.30315	0.158529	0.154899	0.669598	0.168063	0.0684917	0.0279092	0.22808	0.357771	0.186025	0.250429	0.369958	0.158965	0.374523	0.363336	0.197235	0.419666	0.391271	0.260282	0.204413	0.224947	0.225039	0.265031	0.11499	0.306325	0.26247	0.298381	0.189717	0.146277	0.155393	0.113223	0.867979	0.301971	0.194934	0.0834021	0.107007	0.0721515	0.135593	0.330957	0.159176	0.208267	0.177457	0.0505166	0.124622	0.0116041	0.267886	0.4487
NvSOL-like-7 : NV2.3625	0.524665	0.767007	0.328553	0.0464556	0.154734	0.124521	0.38854	0.231534	0.0990188	0.239092	0.371897	0.738264	0.244133	0.312211	0.093974	0.20399	0.298309	0.0770482	0.447216	0.492226	0.393927	0.287935	0.552631	0.62295	0.164103	0.334011	0.658933	0.32233	0.634641	0.804705	0.164959	0.226444	0.044817	0.114468	0.513458	0.434473	0.560244	0.177426	0.0720783	0.262747	0.128041	0.107558	0.167968	0.0844879	0.0116969	0.210852	0.170094	0.169071	1.53771
NvVgccA2-2 : NV2.3042	0.133484	0.161506	0.108083	0.0970802	0	0.228885	0.0605881	0	0.0172709	0.713064	0.328887	0.813843	0.466361	0.460632	0.0953246	0.0495997	0.401179	0.318888	0.117323	0.316545	0.302696	0.354315	0.349409	0.174679	0.344913	0.536171	0.195152	0.277025	0.0648287	0.425784	0.0464788	0.133137	0.0889139	0.331311	0.226841	0.490689	0.273879	0.172078	0.114688	0.186825	0.416329	0.324793	0.413348	0.208232	0.213348	0.114325	0.19948	1.0829	0.509525
NvADAM-1 : NV2.24729	0.634285	0.688722	0.317193	0.160846	0.0877658	0.0500711	0.0645573	0	0	0.246813	0.133959	0.192598	0.141109	0.152541	0.219147	0.180613	0.174435	0.225084	0.197257	0.277681	0.141646	0.226407	0.444694	0.245856	0.0979624	0.243045	0.215906	0.155041	0.213821	0.382862	0.215753	0.190701	0.184509	0.407014	0.256554	0.255084	0.149884	0.0843674	0.0564819	0.0960045	0.26686	0.0369206	0.0492263	0.0830298	0.105045	0.161986	0.0530529	0.454537	0.114325
NvADAM-3 : NV2.13893	0.38542	0.312525	0.260707	0.135492	0.0102225	0.321792	0.155201	0.00224926	0	0.215769	0.166931	0.293927	0.177322	0.162589	0.132405	0.0190528	0.124567	0.0981194	0.0522761	0.0894529	0.178564	0.359341	0.0702964	0.134407	0.0459648	0.167519	0.204336	0.22069	0.109947	0.156636	0.227998	0.297989	0.371575	0.156627	0.254458	0.0659725	0.282236	0.131335	0.0893194	0.101733	0.248416	0.136312	0.123529	0.0832907	0.122072	0.0755408	0.0327501	0.0935506	0.158996
NvCDH-1 : NV2.4715	0.201952	0.338896	0.104145	0.40851	0	0.360881	0.034404	0	0.0327126	0.00800966	0.114418	0.171081	0.105451	0.294728	0.234903	0.307594	0.291186	0.328148	0.444023	0.0895481	0.407382	0.261445	0.172327	0.0825385	0.10362	0.313955	0.106474	0.0543133	0.0187826	0.0747049	1.0123	0.206193	0.0480792	0.0921288	0.211087	0.189712	0.035188	0.0281974	0.0349509	0.0621511	0.0906705	0.0121654	0.026191	0.0899121	0.0340912	0	0.272872	0.0148059	0.013273
NvCFP-13 : NV2.23447	0.164388	0.151164	0.109629	0.0888703	0	0.965034	0.0468093	0.070447	0.0652851	0.121243	0.170001	0.140203	0.140439	0.102303	0.00390747	0.106628	0.115322	0.237525	0.137098	0.0755823	0.0788997	0.131153	0.101469	0.0939411	0.050636	0.0289245	0.120319	0.0545249	0.100157	0	0	0.0704272	0.0533412	0.108691	0.097454	0.0248479	0.0734648	0.0754359	0.0380351	0.0303182	0.12221	0.153802	0.084318	0.0609038	0.190937	0.0394821	0.107334	0.0106943	0.0659266
NvCub-6 : NV2.13183	0.620594	0.824346	0.450944	0.409855	0.189286	0.232692	0.264812	1.00576	0.128608	0.439523	0.306633	0.55294	0.723462	0.507618	0.244592	0.194397	0.344925	0.323846	0.238252	0.38443	0.292301	0.27158	0.38548	0.484392	0.206717	0.412699	0.3728	0.473639	0.567558	0.556019	0.0409333	0.182091	0.363028	0.421569	0.456664	0.13944	0.426925	0.467052	0.247914	0.377015	0.140319	0.351849	0.457994	0.219732	0.16054	0.303539	0.271627	0.349411	0.426409
NvCystat-1 : NV2.8996	0.747279	0.729437	0.955982	0.412469	0.462542	0.853463	0.691241	0.0726428	0.0556658	0.76129	0.559329	0.860549	0.79158	0.165427	0.405305	0.12886	0.318195	0.200754	0.100084	0.467847	0.347905	0.672787	0.3724	0.46493	0.626154	0.368271	0.522984	0.429648	0.560984	0.286788	0.306791	0.454851	0.904672	0.129629	0.703048	0.428528	0.806668	0.53055	0.407491	0.646496	0.103467	0.331812	0.452032	0.200272	0.219334	0.727743	0.526677	0.186919	0.555269
NvCystat-2 : NV2.12344	0.263017	0.349104	0.297979	0.206877	0.392232	0.721761	0.54327	1.88917	3.38391	0.463844	0.159127	0.88686	0.364196	0.188531	0.329875	0.500646	0.346246	0.621069	0.53483	0.41129	0.577058	0.287194	0.557789	0.537284	0.805165	0.279456	0.539612	0.763435	0.422401	0.406278	0.714027	0.490915	0.455715	0.380851	0.436439	0.195089	0.515802	0.298738	0.254763	0.605802	0.0582377	0.45302	0.292818	0.240189	0.298735	0.200127	0.0787897	0.84326	0.493225
NvCystat-3 : NV2.17628	1.15567	1.28605	0.889332	0.905025	0.908928	0.910852	0.185388	0.318025	0.187449	0.79321	0.377927	0.612065	0.406294	0.299031	1.08791	1.04612	0.889754	0.809823	1.00211	0.818219	0.630456	0.768995	1.07962	0.942854	0.587561	1.19027	0.853816	1.33858	1.30766	0.754874	0.756746	0.621984	0.642979	0.684288	1.41176	0.704058	1.62015	1.32236	0.736173	1.08828	1.47116	1.00235	1.05713	0.768692	0.432367	0.827034	0.348684	1.84463	1.10242
NvIgCam-1 : NV2.361	0.0282925	0.039189	0.43797	0.677414	1.01108	0.0500711	0.00124613	0	0.0475613	0.169331	0.814858	1.4632	1.19355	0.438724	0.613937	1.99549	1.42549	1.20208	0.713978	0.908772	1.1685	0.503785	0.589748	0.753515	0.185208	0.248647	0.812264	0.395349	0.833062	1.26531	0.275734	0.328075	0.383917	0.813334	0.511449	0.174549	0.469364	0.241449	0.29287	0.293811	0.12298	0.434182	0.277487	0.163692	0.179183	0.26759	0.0348526	1.94521	0.728529
NvKusi-3 : NV2.3373	0.323331	0.253708	0.399393	0.277254	0.387317	0.0500711	0.262705	0.0573821	0.10199	0.524552	0.425617	0.528211	0.234477	0.249607	0.388833	0.620225	0.513187	0.701299	0.501838	0.786515	0.49579	0.35713	0.528264	0.422664	0.798736	0.477894	0.56933	0.571264	0.514611	0.689227	1.75533	0.461872	0.230471	0.581992	0.80819	0.343803	0.657004	0.284836	0.235419	0.273459	0.248973	0.132399	0.326034	0.137652	0.0927387	0.16874	0.357212	0.574616	1.30984
NvL1Cam-1 : NV2.1171	0.658647	0.811745	0.314477	0.293265	0.194888	0.794118	0.130925	0.00820654	0.00808737	0.337599	0.141076	0.383574	0.165956	0.299584	0.0764908	0.210423	0.148737	0.29872	0.354244	0.338155	0.191992	0.392814	0.239775	0.201215	0.306253	0.0842781	0.147225	0.180608	0.300504	0.186058	0.66194	0.201944	0.0821473	0.305787	0.344964	0.226833	0.268464	0.137356	0.148289	0.120981	0.0310588	0.424804	0.197153	0.166116	0.12926	0.0150247	0.202685	0.285704	0.214482
NvMfap1 : NV2.13515	0.262613	0.27348	0.376092	0.384087	0.466477	0.163854	0.218428	0.0199731	0.00948936	0.284974	0.169981	0.354674	0.320936	0.339197	0.0500413	0.078985	0.245417	0.0466776	0.167854	0.1956	0.155213	0.448396	0.104909	0.171703	0	0.470676	0.304532	0.177561	0.165482	0.0756407	0.0415773	0.157589	0.286301	0.7385	0.170436	0.270545	0.16075	0.105915	0.0940259	0.130422	0.342698	0.124867	0.176413	0.137974	0.106248	0.172992	0.085752	0.231941	0.242914
NvNCAM1-1 : NV2.21902	1.12327	1.37157	1.27314	0.333801	0.0511124	0	0.0115011	0	0	0.253505	0.602386	0.573134	0.195725	1.01056	0.178919	0.521653	0.5204	0.688132	0.296156	0.522288	0.485024	0.517492	0.64982	0.382451	0.0850324	0.780426	0.508455	0.262703	0.43856	0.703431	0.422435	0.213573	0.500229	1.25591	0.470744	0.079764	0.157941	0.198459	0.141688	0.272946	0.0767668	0.0907239	0.293746	0.157378	0.130554	0.251175	0.171118	0.37172	0.278579
NvRobo-like : NV2.21353	0.115792	0.0608114	0.174421	0.290878	0.197962	0.100142	0.258825	0.212181	0	0.238057	0.294821	0.187158	0.434879	0.121895	0.236337	0.0652906	0.157051	0.28568	0.277908	0.389121	0.429423	0.59516	0.127923	0.176296	0.171261	0.25218	0.169538	0.10527	0.0588966	0.0914442	0.12804	0.0782555	0.161861	0.560711	0.206403	0.211117	0.0842242	0.0137948	0.0855818	0.0628306	0.140612	0.0864109	0.0719725	0.0170716	0.0436867	0.0259308	0.0753556	0.0831003	0.119641
NvScrib : NV2.5524	0.964332	0.895299	0.51354	0.168093	0.0976509	0.548036	0.377557	0.786565	0.660234	0.32916	0.431091	0.950042	0.397318	0.584288	0.0469862	0.334727	0.309193	0.269047	0.248054	0.334116	0.301123	0.130732	0.34667	0.236947	0.430371	0.255686	0.334562	0.274188	0.204304	0.0728523	0.325717	0.254497	0.0565726	0.706156	0.475219	0.474236	0.141988	0.173681	0.0939669	0.142879	0	0.027323	0.151979	0.046998	0.113725	0.0445853	0.230291	0.178344	0.333722
NvSerpin-2 : NV2.21103	0.164948	0.113047	0.242729	0.23391	0.340293	0.546054	0.0369438	0.00393326	0	0.269576	0.240533	0.285067	0.114667	0.04793	0.230762	0.514934	0.412923	0.12815	0.296818	0.229555	0.107488	0.272276	0.126127	0.10163	0.354864	0.155399	0.284002	0.288016	0.278258	0.545101	0.546326	0.303858	0.294068	0.292974	0.23637	0.118768	0.317794	0.306483	0.0880522	0.18082	0	0.437677	0.191576	0.198468	0.205172	0.157458	0.0441563	0.344664	0.304853
NvSOL-like-6 : NV2.3169	0.152854	0.437233	0.222404	0.158632	0.0723435	0.144388	0.00615916	0.00629937	0.0248259	0.374495	0	0.209049	0.114258	0.398884	0.393514	0.254054	0.273365	0.327388	0.295732	0.29891	0.362552	0.398292	0.367426	0.428836	0.145435	0.305801	0.371937	0.273394	0.469315	0.314109	0.107248	0.131232	0.42007	0.283638	0.281331	0.234856	0.375916	0.184778	0.181232	0.267361	0.064071	0.444879	0.383498	0.274533	0.221085	0.267564	0.056255	0.196548	0.112705
NvSynd : NV2.6659	1.65079	1.59371	2.61984	1.34603	0.764565	0.483826	0.0447927	0.0200814	0.181912	2.03802	2.33857	2.60375	1.64269	1.69314	1.95746	2.61912	1.84077	2.00942	2.1312	2.5937	2.49891	2.12534	2.95281	2.02618	1.57772	1.51987	3.19419	2.04012	2.55965	3.68996	2.32058	1.42812	1.55955	3.49285	2.56164	1.56769	2.08275	1.11865	0.900184	1.17818	0.868808	0.900093	0.877268	0.718096	0.421451	0.873504	0.849424	0.512455	3.10232
NvTGFbR : NV2.5822	0.131855	0.0619372	0.160968	0.175237	0.0282547	0	0.012952	0	0.0258249	0.64892	0.229834	0.328431	0.36705	0.536878	0.396631	0.807691	0.659907	0.489167	0.685505	0.545798	0.788455	0.318799	0.778471	0.123147	0.477013	1.51505	0.474618	0.257351	0.297177	0.132148	0.222965	0.125453	0.183431	1.41051	0.283142	0.428311	0.235373	0.0805869	0.0445924	0.0591994	0.210404	0.0765564	0.0915398	0.151609	0.0644824	0.133388	0	1.4854	0.720095
NvThyr-3 : NV2.19319	0.247529	0.218523	0.13353	0.162052	0.403371	0.330455	0.202433	0.0796783	0.170556	0.275584	0.00767665	0.029218	0.172171	0.204246	0.275369	0	0.111728	0.106908	0.437727	0.126487	0.0904532	0.0719713	0.29825	0.283118	0.0517448	0.0396032	0.269762	0.567908	0.382465	0.143664	0.330095	0.120683	0.155602	0.105526	0.233775	0.0533957	0.507886	0.357452	0.185923	0.256204	0.0266752	0.361386	0.342379	0.362872	0.130805	0.230043	0.284784	0.126204	0.0673196
NvvLDL-2 : NV2.1337	0.473627	0.596193	0.508163	0.645227	0.49719	0.360881	0.398067	0.246436	0.0153109	0.459835	0.965654	0.608212	0.397023	0.876374	1.37293	0.933157	1.40696	1.51863	1.35743	1.69868	1.12096	1.23534	1.46519	2.15246	0.453892	0.504471	1.48607	1.38559	1.89828	2.62658	0.620049	0.477754	0.186942	1.25354	1.09111	0.643955	1.2349	1.97708	0.836975	1.27512	0.847298	1.00284	2.05053	0.712202	0.370666	0.901275	0.194872	1.69608	1.5587
NvvWFA-17 : NV2.19051	0.208948	0.207128	0.234515	0.183137	0.792514	0	0.46552	0.350302	0.0306038	0.0889957	0.191488	0.279001	0.159052	0.288801	0.0110403	0.0909691	0.058476	0.0196414	0	0.116646	0.0761998	0.146878	0.315948	0.101614	0.122802	0.0906947	0.164092	0.127582	0.173008	0.0708115	0.172275	0.117515	0.157003	0.0637426	0.199574	0.209059	0.188282	0.0983675	0.07963	0.236244	0.05973	0.0482636	0.0942006	0.116801	0.0588346	0	0.103263	0.2705	0.193798
NvZP-1 : NV2.5824	2.04114	1.50661	2.39244	0.289258	0.101319	2.05344	0.00238717	0.00487643	0.0128708	0.0917745	0.061949	0.143631	0.249465	0.287459	0.107957	0.06332	0.097836	0.0872809	0.209917	0.235105	0.225926	0.233143	0.145873	0.33629	0.24622	0.0513158	0.206644	0.501295	0.207348	0.1317	0.412219	0.104753	0.377037	0.165783	1.22394	0.0931911	0.499119	0.279937	0.128514	0.313577	0.136295	0.187501	0.218431	0.095709	0.0407755	0.145732	0.0458242	0.0745186	0.0779533
[truncated: 61 more columns]
